# Supplementary material for: Evidence for cable bacteria inhabiting deep in anoxic sediment reveals a novel ecological niche
Source: Research Square preprint supplement (doi:10.21203/rs.3.rs-6914568/v1), 2025-07-02
Supplement: Supplementary file 1 [file 14b9d7f61085aab0b78572e5.docx]

Supplementary Materials for

**Evidence for cable bacteria inhabiting deep in anoxic sediment reveals a novel ecological niche**

Alexis Fonseca1,2*, Martijn Hermans1*,Francisco J.A. Nascimento1,2, Christian Stranne1,3,4, Alf Norkko5, Bo G. Gustafsson1,6 & Christoph Humborg1

1Baltic Sea Centre, Stockholm University, Stockholm, Sweden

2Department of Ecology, Environment and Plant Sciences, Stockholm University, Stockholm, Sweden

3Department of Geological Sciences, Stockholm University, Stockholm, Sweden

4Bolin Centre for Climate Research, Stockholm University, Stockholm, Sweden

5Tvärminne Zoological Station, University of Helsinki, Hanko, Finland

6Baltic Nest Institute, Stockholm University, Stockholm, Sweden

*Corresponding authors. Email: [alexis.fonseca@su.se](mailto:alexis.fonseca@su.se) and [martijn.hermans@su.se](mailto:martijn.hermans@su.se)

[francisco.nascimento@su.se](mailto:francisco.nascimento@su.se)

[christian.stranne@geo.su.se](mailto:christian.stranne@geo.su.se)

[alf.norkko@helsinki.fi](mailto:alf.norkko@helsinki.fi)

[bo.gustafsson@su.se](mailto:bo.gustafsson@su.se)

[christoph.humborg@su.se](mailto:christoph.humborg@su.se)

## Taxonomic identification and quantification of cable bacteria in Koljö Fjord

Cable bacteria identification and abundance was further analysed in Koljö Fjord, assembling the rRNA gene reads (obtained by SortMeRNA ) using rnaSPAdes (spades V 4.0.0; Bushmanova et al., 2019) with “-k 31,55,77,97,127”. 16S rRNA gene sequences were identified with Barrnap V0.9 (https://github.com/tseemann/barrnap) and aligned against the SILVA_138.1_SSURef_NR99 database, augmented with 34 *Ca*. Electrothrix spp. 16S rRNA gene sequences, using BLASTN V2.15.0+ (Chen et al., 2015) with “-max_target_seqs 1.” 16S rRNA gene sequence matching with *Ca*. Electrothrix spp. with >90% identity, e-value < 1x10e-10 and query cover > 95% were selected and quantified using CoverM (Aroney et al., 2025) with the mode “contig” and method transcripts per million “-m  tpm,” previous mapping of original rRNA gene reads against the assembled and annotated *Ca*. Electrothrix spp. 16S rRNA sequences. Thirteen partial 16S rRNA *Ca*. Electrothrix gene sequences ranging from 411 bp to 941 base pairs (bp) were obtained (Supplementary Data 2).


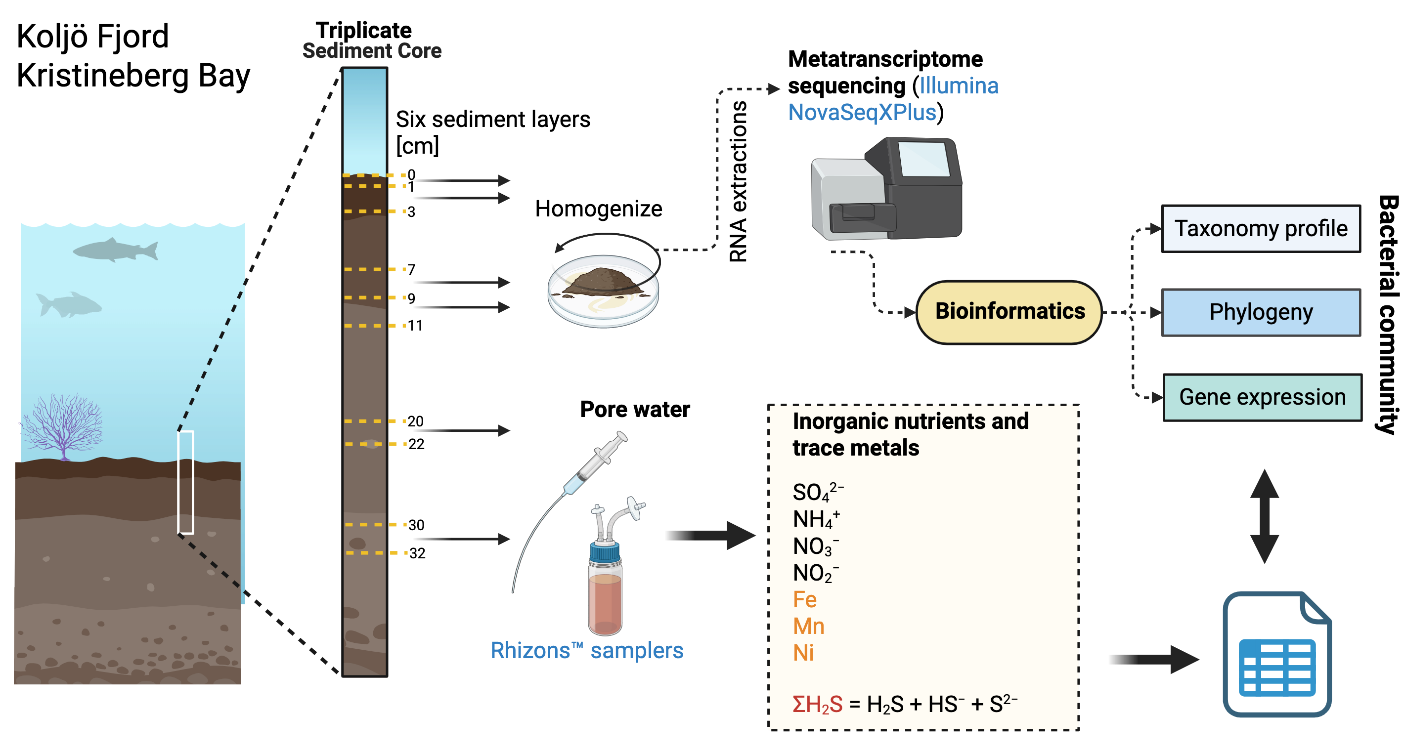


Figure S1 | Scheme of the workflow for the collection and analysis of samples from Koljö Fjord and Kristineberg Bay. In the case of core 2 from Kristineberg Bay, a sediment sample was obtained from the 0 to 2 cm layer, in contrast to the 0–1 cm layer sampled from cores 1 and 3.


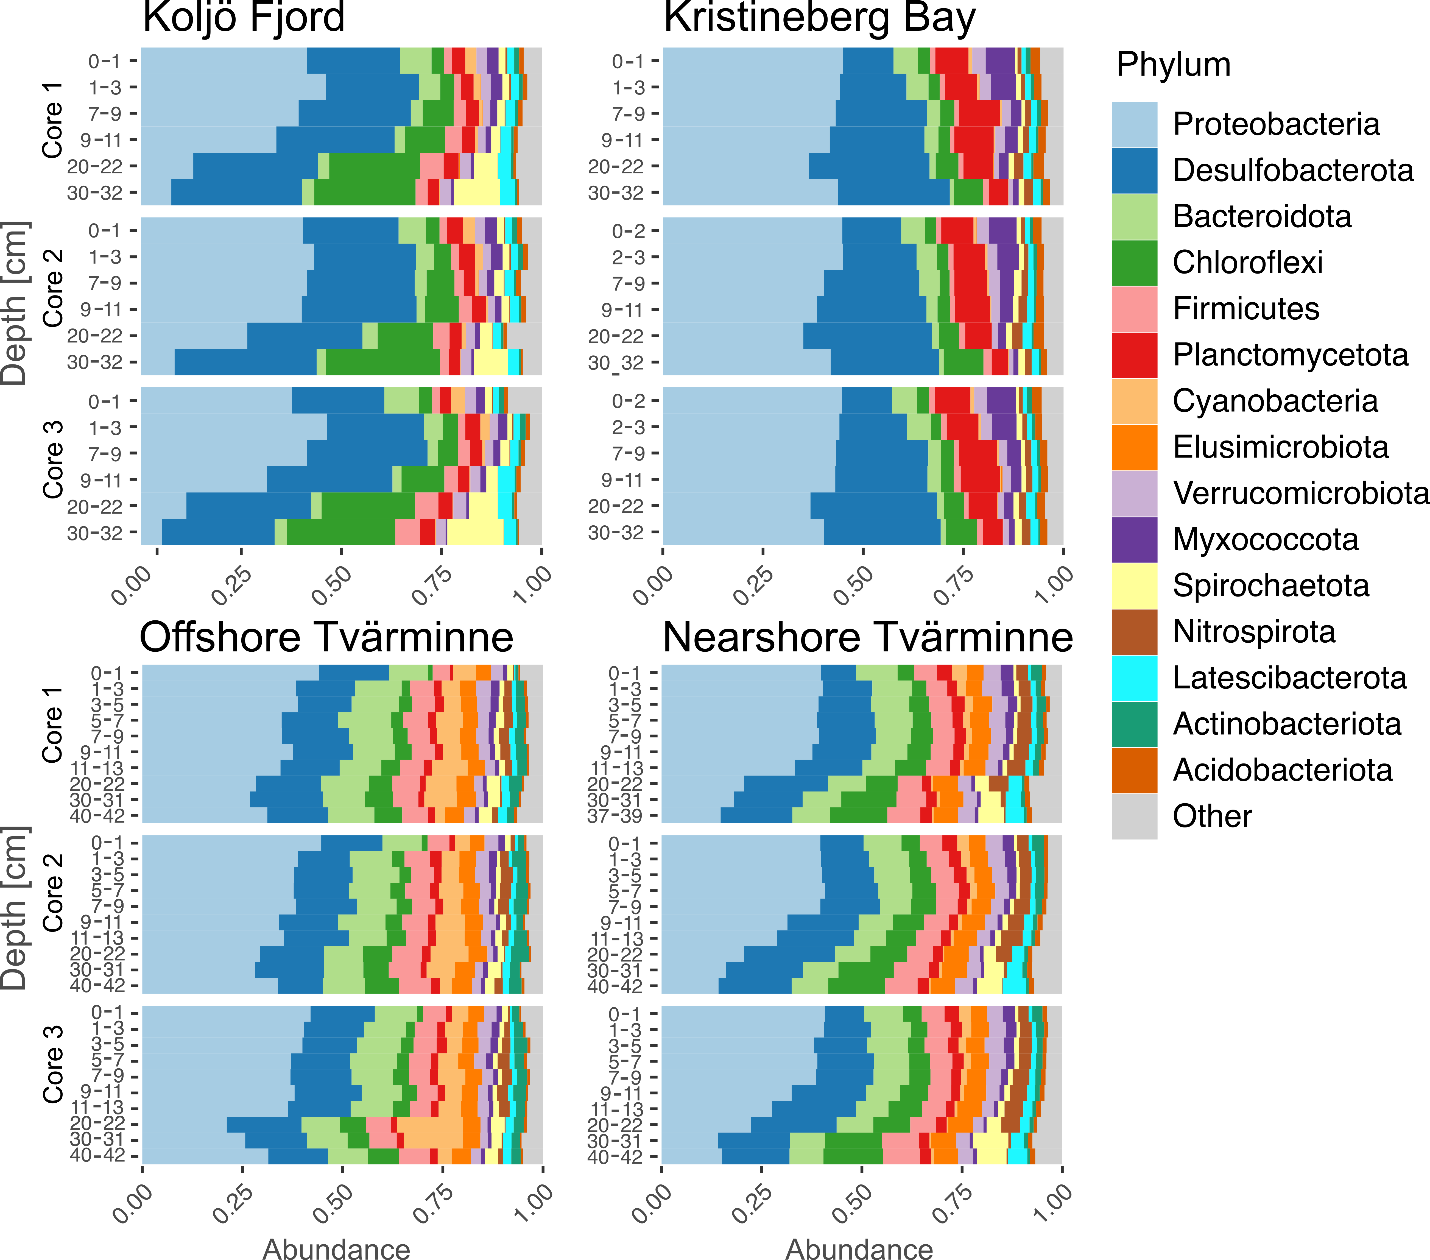


Figure S2 | The 15 most abundant phyla by depth and location. The taxa are ranking from the most abundant to less and deploy in relative abundance.


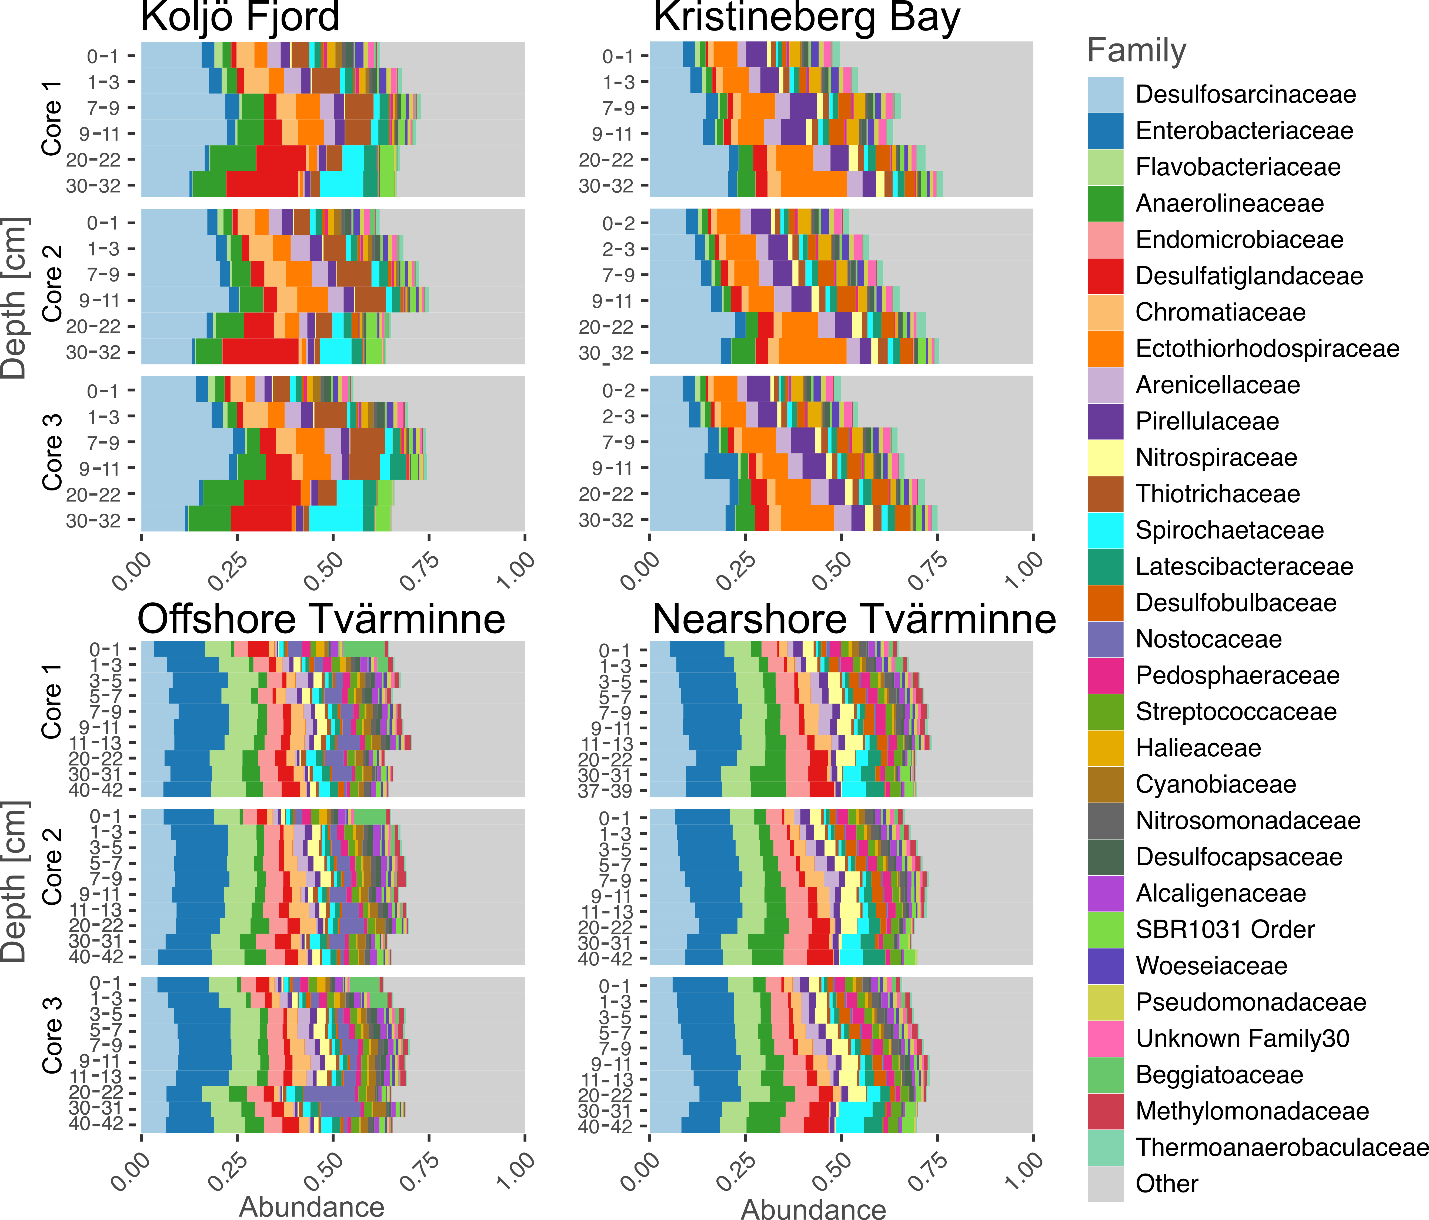


Figure S3 | The 30 most abundant families by depth and location. The taxa are ranking from the most abundant to less and deploy in relative abundance.


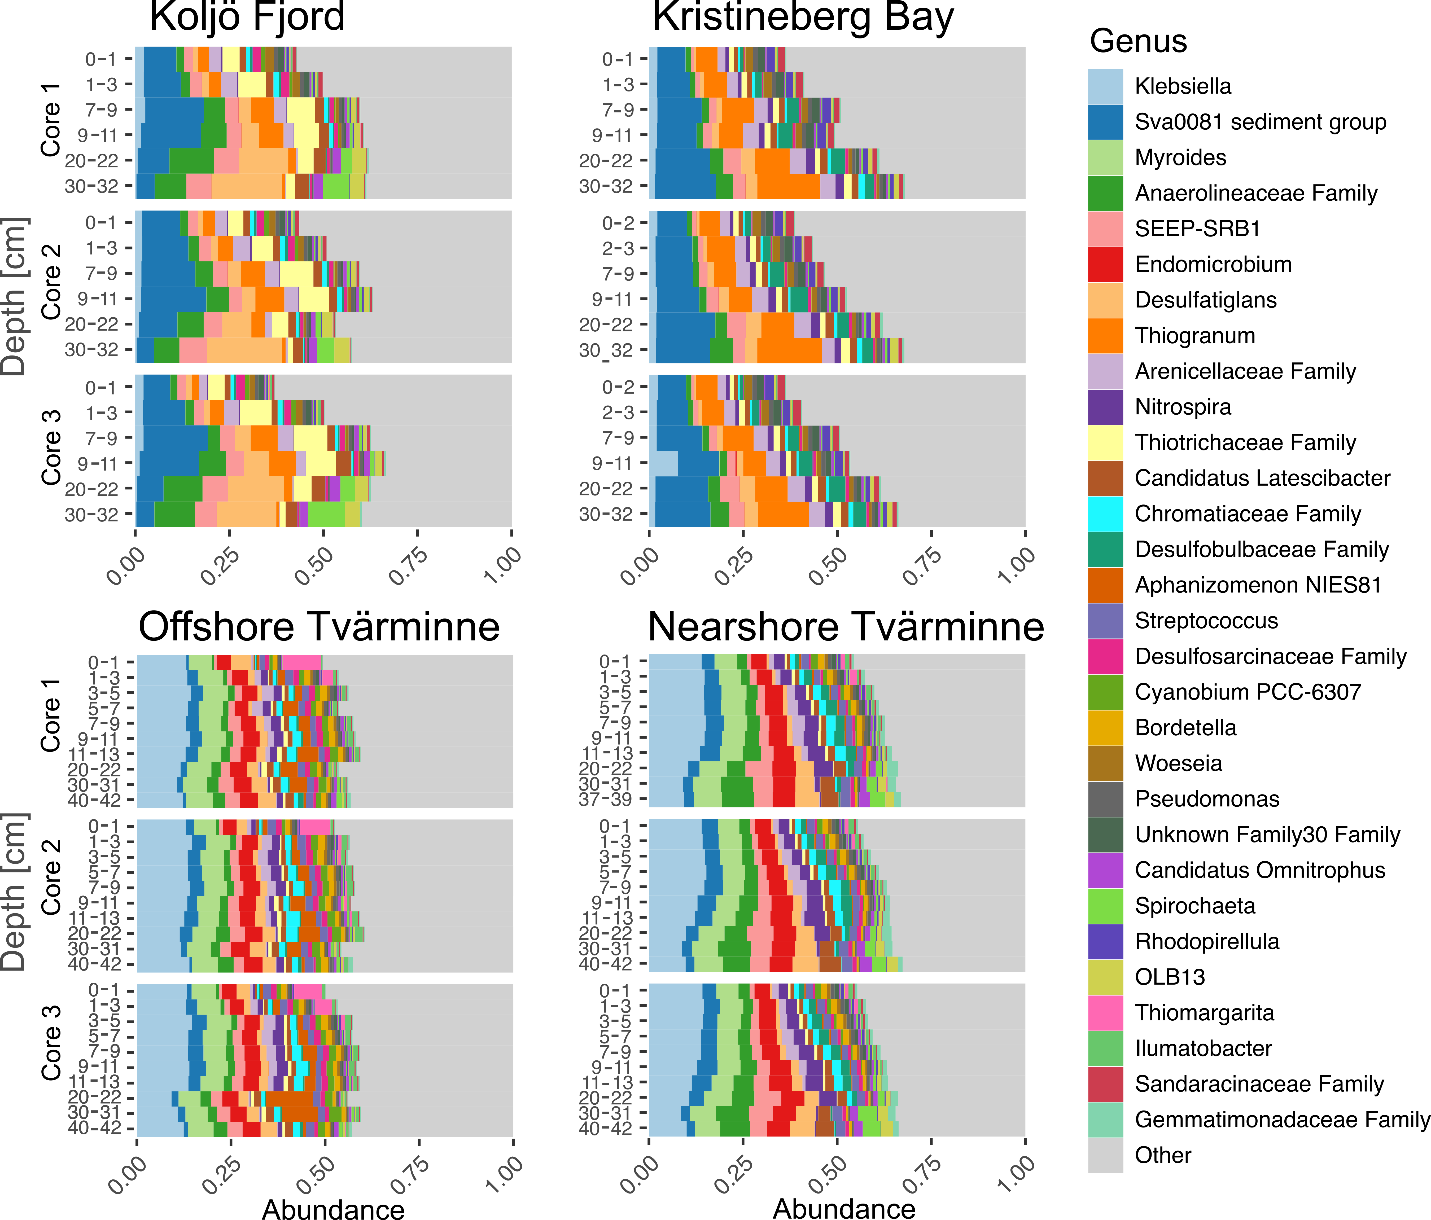


Figure S4 | The 30 most abundant genera by depth and location. The taxa are ranking from the most abundant to less and deploy in relative abundance.


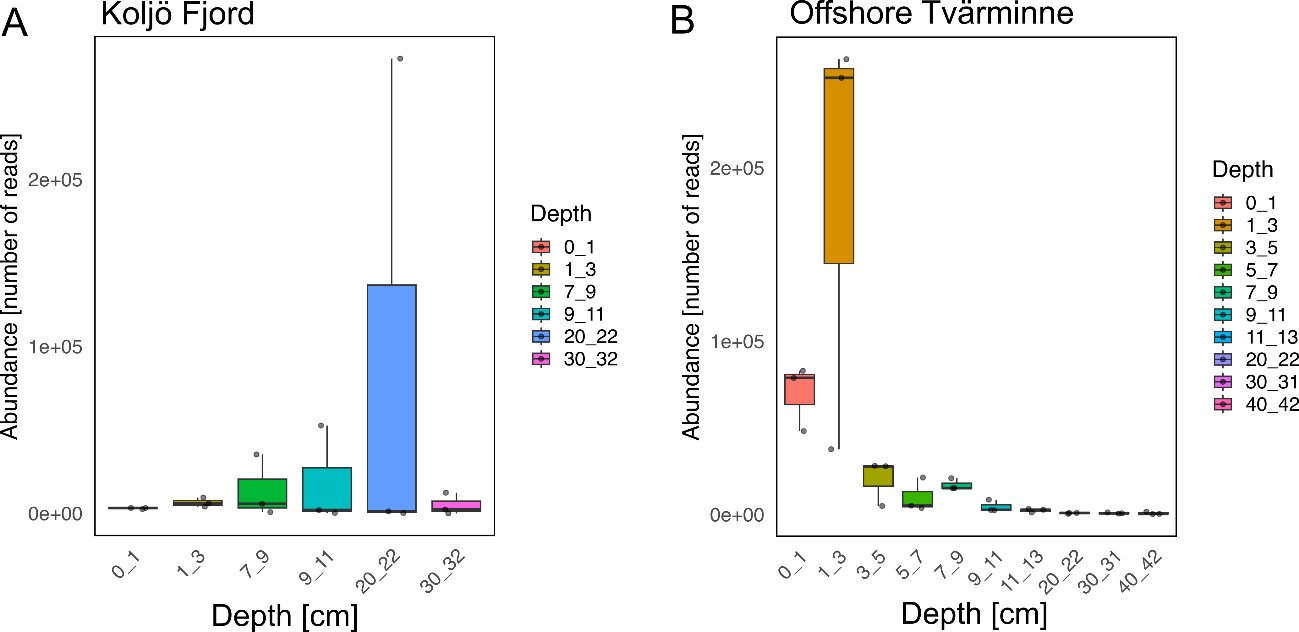


Figure S5 | *Candidatus* Electrothrix abundance as assigned by Kraken2 and Bracken in Köljo Fjord and Offshore Tvärminne. The 16S rRNA gene sequences were identified through total SSU rRNA using Kraken2 and Bracken programmes at (A) Koljö Fjord and (B) the Offshore Tvärminne station.


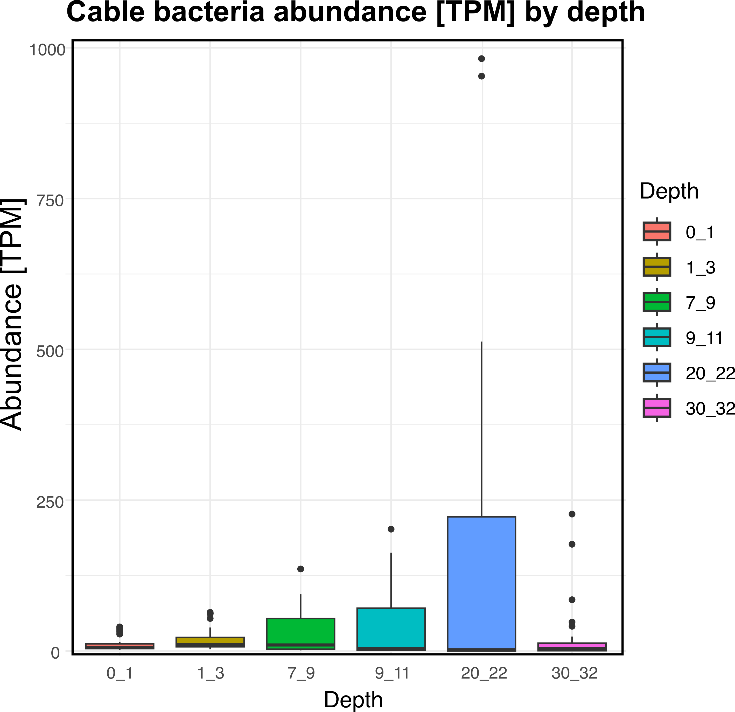


Figure S6 | Abundance of partial 16S rRNA genes of *Candidatus* Electrothrix in Köljo Fjord. Thirteen partial 16S rRNA gene sequences were obtained and quantified. rRNA sequences were previously separated using SortMeRNA and subsequently assembled using rnaSpades.py. 16S rRNA genes were identified using Barrnap V0.9, annotated using BLASTN and the SILVA_138.1_SSURef_NR99 database as a reference, and augmented with 34 *Ca*. Electrothrix. Abundance was quantified using CoverM in transcripts per million (TPM) by depth.


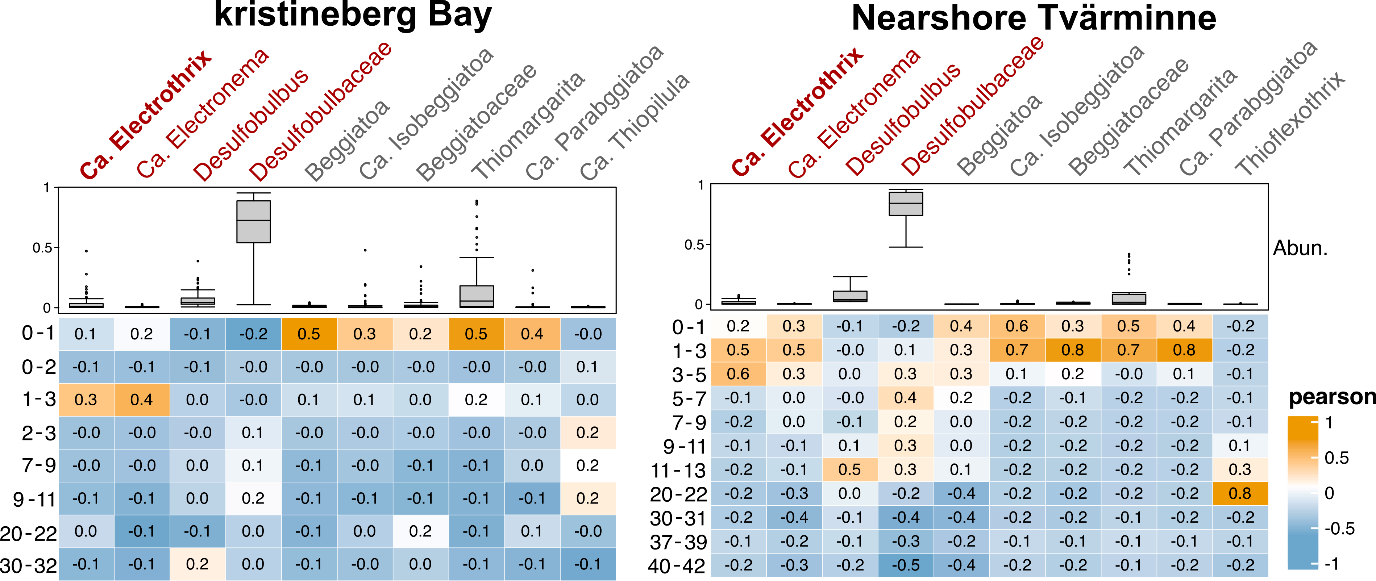


Figure S7 | Pearson correlations. Correlations among depths and the abundance of *Candidatus* Electrothrix and three other genera from the Desulfobulbaceae family (indicated in red) and the six most abundant genera from the Beggiatoaceae family in Kristineberg Bay and the Nearshore Tvärminne station.


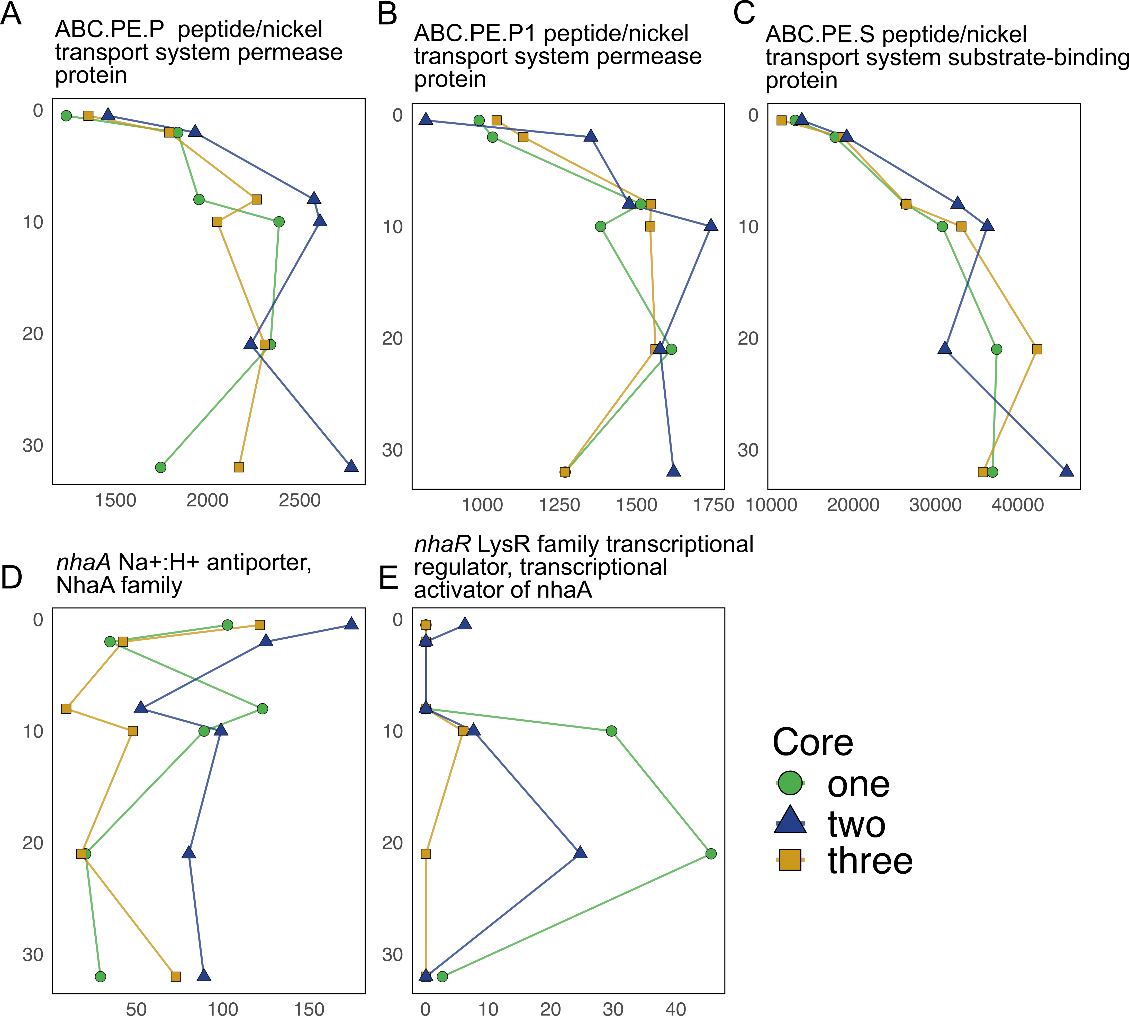


Figure S8 | Gene expression profiles linked to nickel and marine adaptation in Köljo Fjord. A-C) Gene expression profiles by depth of genes associated with sulfur, D-F) nickel metabolism and G-H) marine adaptation.


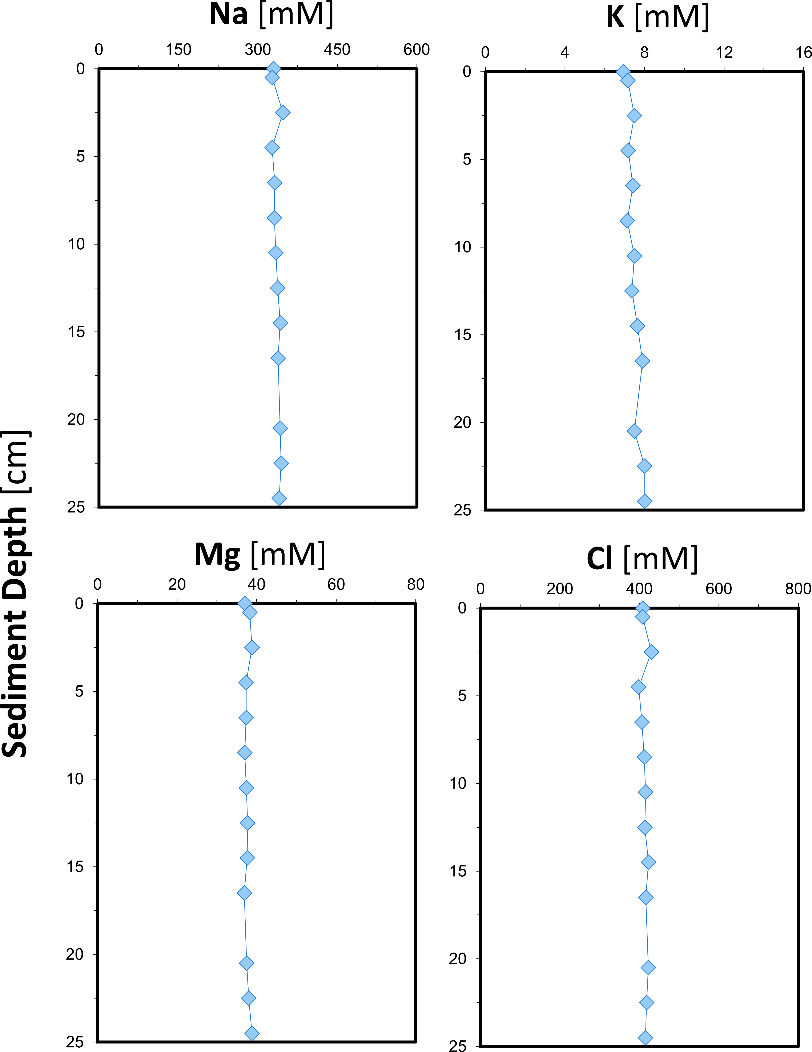


Figure S9 | Porewater profiles of Sodium (Na), potassium (K), magnesium (Mg), and chloride (Cl) concentrations (mM) by sediment depth in Koljö Fjord.


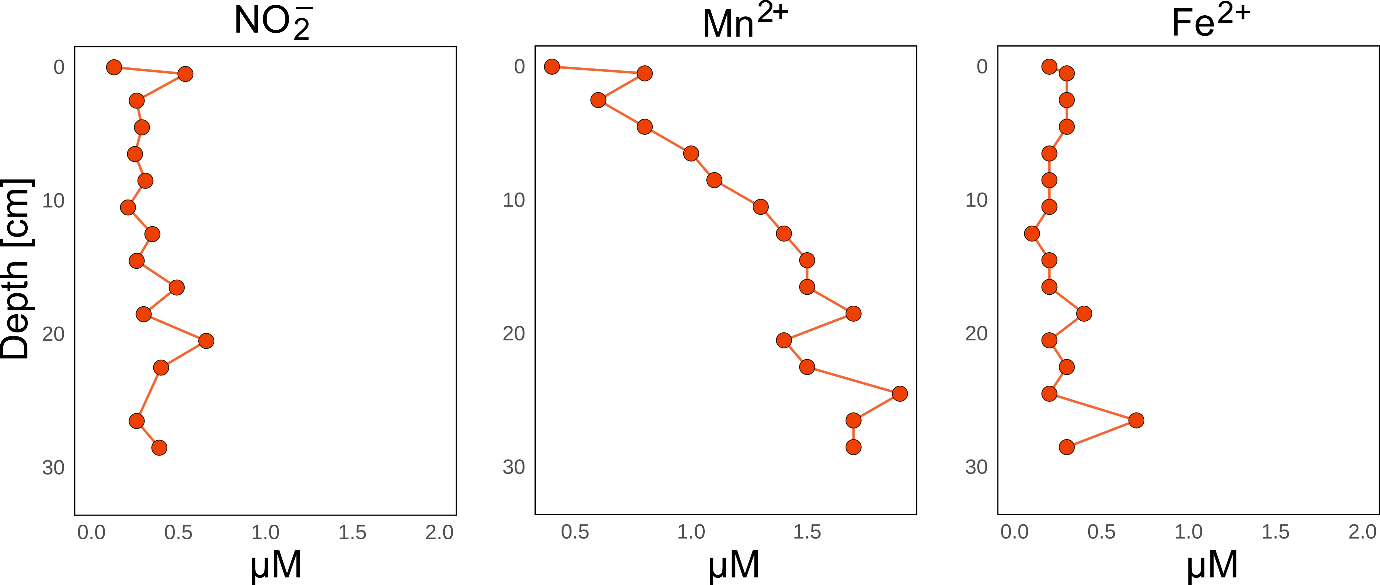


Figure S10 | Porewater profiles of nitrate (NO2−), manganese (Mn2+) and iron (Fe2+) concentrations in Koljö Fjord.


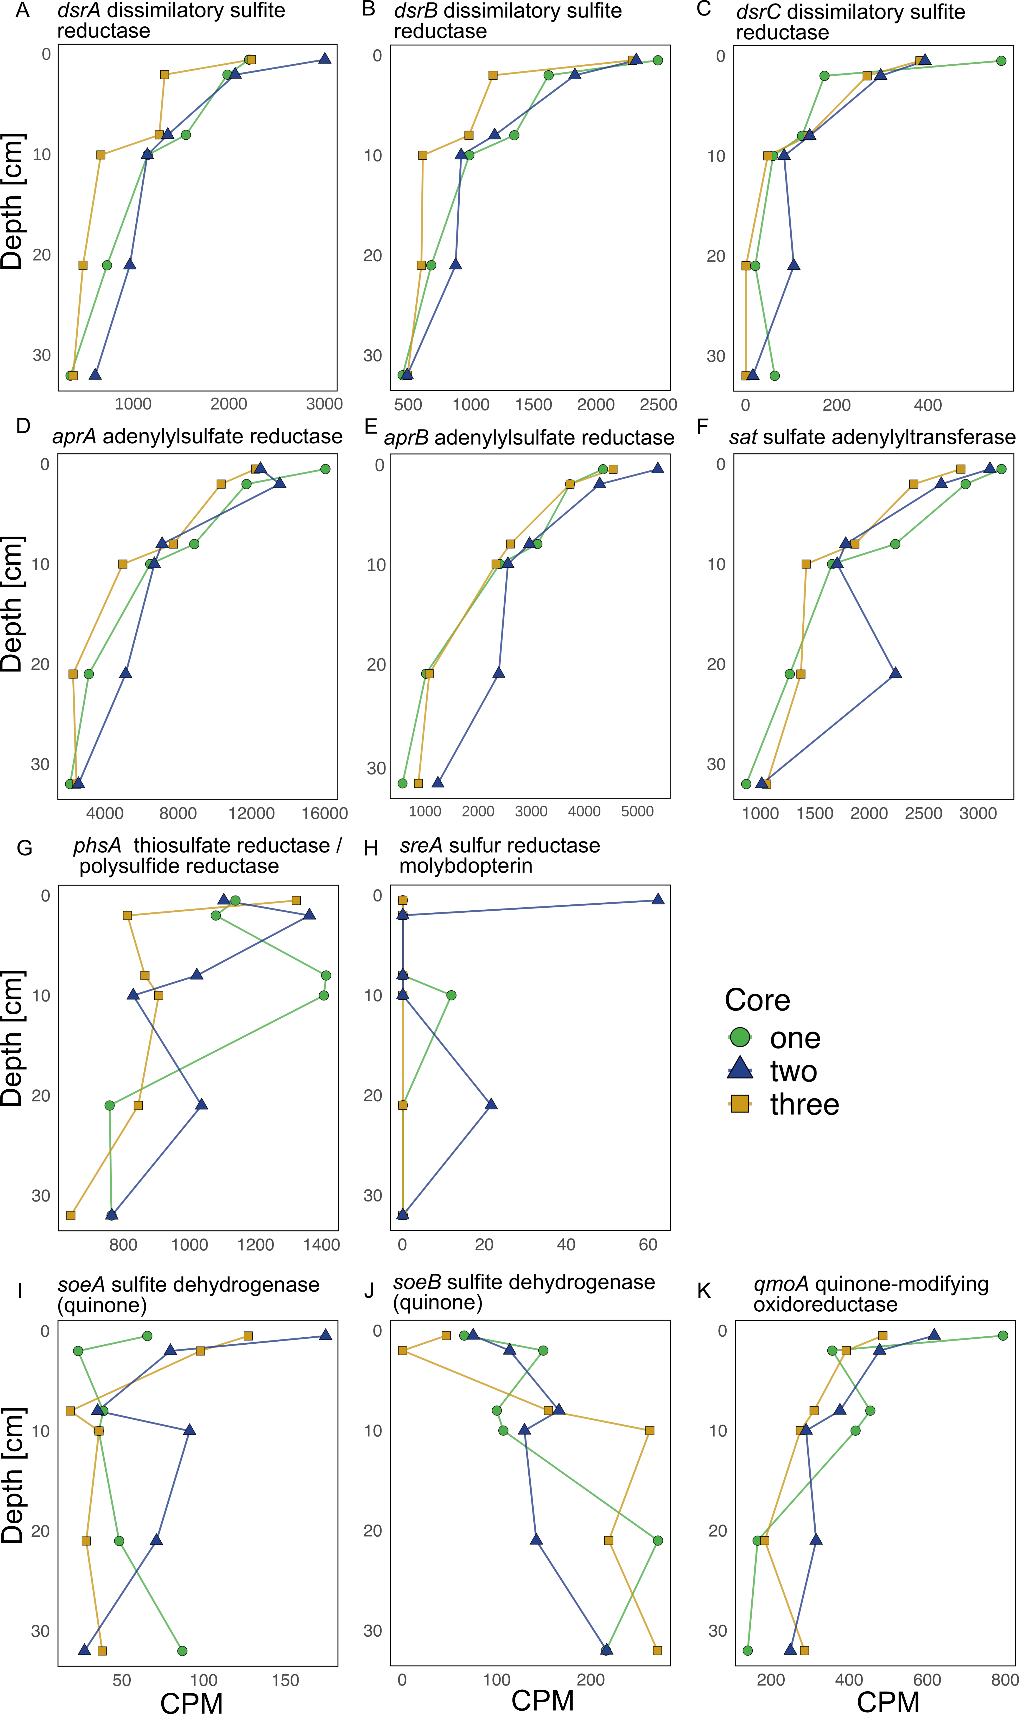


Figure S11 | Gene expression profiles linked to sulfur in Köljo Fjord. Gene expression profiles by depth of genes associated with sulfur metabolism.


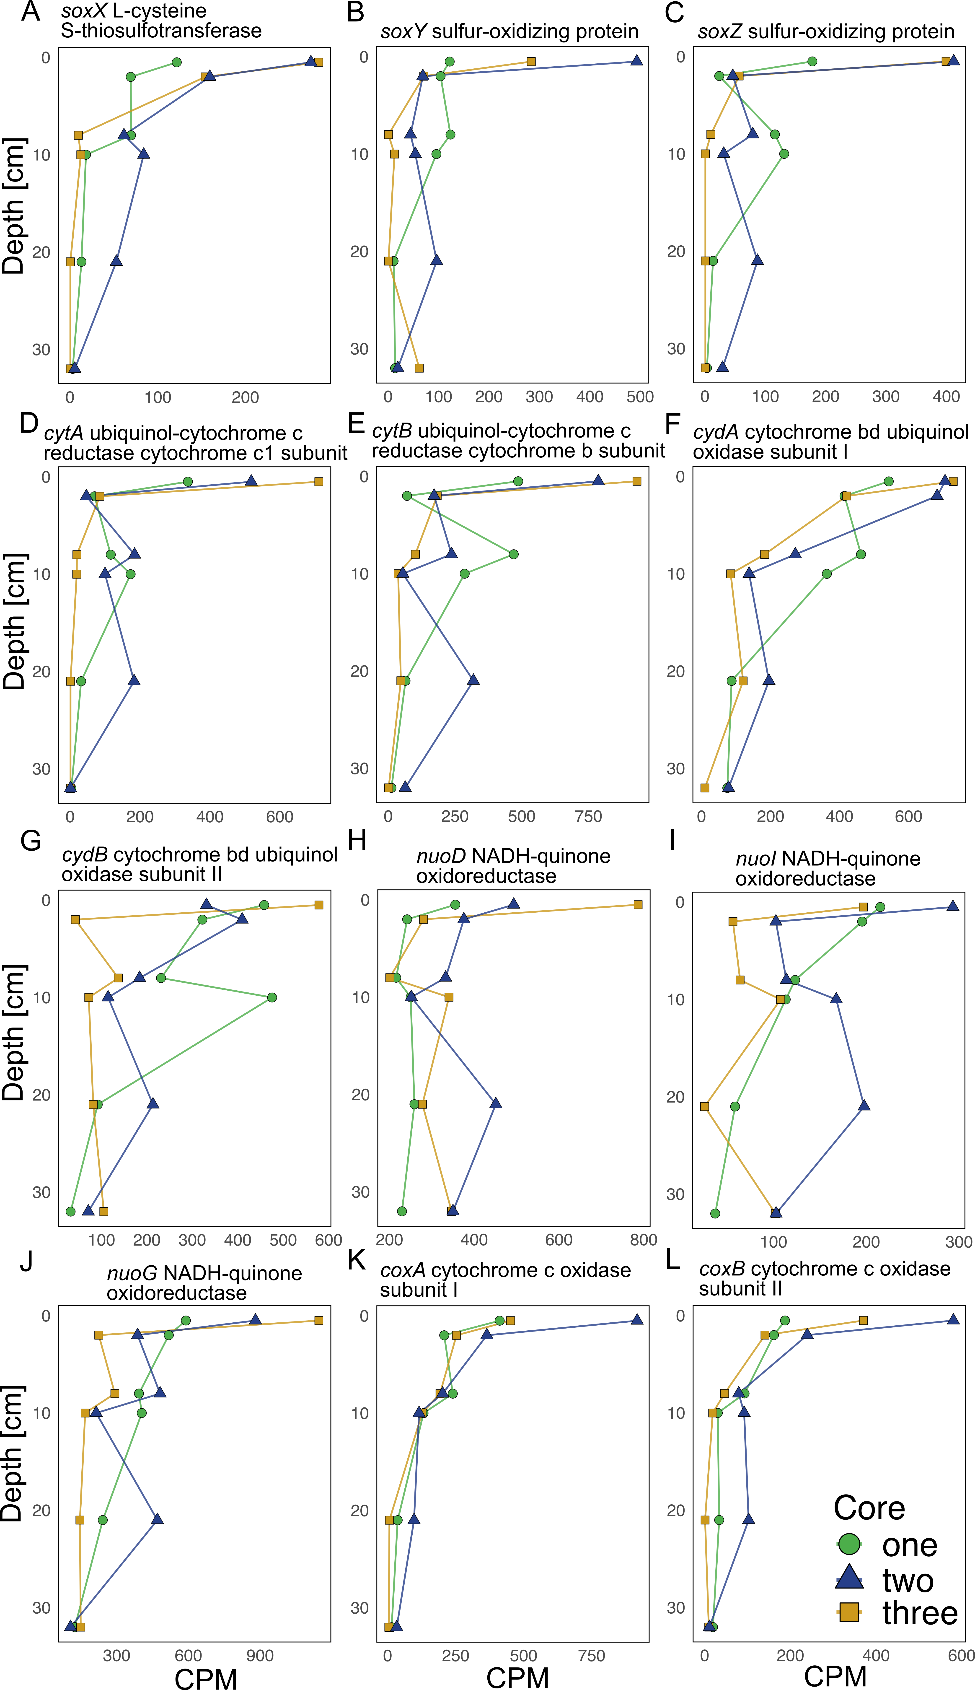


Figure S12 | Gene expression profiles linked to sulfur and electron transfer in Köljo Fjord. A-C) Gene expression profiles by depth of genes associated with sulfur metabolism and D-L) electron transfer

Table S1 | Characteristics of the stations studied. Stations on the west coast of Sweden (SE) and the Tvärminne archipelago in southern Finland (FI). BW = Bottom water.

| **Station** | **Water depth [m]** | **Latitude** | **Longitude** | **BW salinity** | **BW O2 [mg/L]** | **BW redox conditions** |
| --- | --- | --- | --- | --- | --- | --- |
| Koljö Fjord (SE) | 12 | 58°15'28" | 11°34'5" | 32.7 | 1.4 | hypoxic |
| Kristineberg Bay (SE) | 40 | 58°14'58" | 11°26'32" | 24.0 | 4.4 | oxic |
| Nearshore (FI)* | 13.5 | 59°55'22" | 23°20'18" | 5.9 | 4.2 | oxic |
| Offshore (FI)* | 22.5 | 59°51'28" | 23°22'31" | 6.2 | 1.7 | hypoxic |

*Sampling and data reported by Hermans *et al*. (2024)

Table S2 | Kruskal-Wallis test of *Candidatus* Electrothrix abundance in Offshore Tvärminne station samples. Chi-squared = 26.385, df = 9, p-value = 0.001767. Duncan’s test on Kruskal-Wallis multiple comparison p-values adjusted with the Benjamini-Hochberg method.

| **Depth Comparison [cm]** | | **Z** | **P.unadj** | **P.adj** |
| --- | --- | --- | --- | --- |
| 0-1 | 1-3 | -0.13912167 | 0.889354006 | 0.9095666 |
| 0-1 | 11-13 | 2.13319892 | 0.032908412 | 0.13462532 |
| 1-3 | 11-13 | 2.27232059 | 0.023067154 | 0.12975274 |
| 0-1 | 20-22 | 3.01430282 | 0.002575706 | **0.02318135** |
| 1-3 | 20-22 | 3.15342449 | 0.00161367 | **0.02420505** |
| 11-13 | 20-22 | 0.8811039 | 0.378261586 | 0.50064033 |
| 0-1 | 3-5 | 0.83473001 | 0.403869739 | 0.51926109 |
| 1-3 | 3-5 | 0.97385168 | 0.330130188 | 0.47922124 |
| 11-13 | 3-5 | -1.29846891 | 0.194126254 | 0.41598483 |
| 20-22 | 3-5 | -2.17957281 | 0.029289142 | 0.13180114 |
| 0-1 | 30-31 | 2.92155504 | 0.003482887 | **0.02612165** |
| 1-3 | 30-31 | 3.06067671 | 0.002208374 | **0.02484421** |
| 11-13 | 30-31 | 0.78835612 | 0.430488428 | 0.53811054 |
| 20-22 | 30-31 | -0.09274778 | 0.926103938 | 0.92610394 |
| 3-5 | 30-31 | 2.08682503 | 0.036903954 | 0.13838983 |
| 0-1 | 40-42 | 3.15342449 | 0.00161367 | **0.03630757** |
| 1-3 | 40-42 | 3.29254616 | 0.000992846 | **0.04467807** |
| 11-13 | 40-42 | 1.02022557 | 0.307621493 | 0.4773437 |
| 20-22 | 40-42 | 0.13912167 | 0.889354006 | 0.93071931 |
| 3-5 | 40-42 | 2.31869448 | 0.020411608 | 0.13121748 |
| 30-31 | 40-42 | 0.23186945 | 0.816639415 | 0.89631155 |
| 0-1 | 5-7 | 1.25209502 | 0.210535243 | 0.41191678 |
| 1-3 | 5-7 | 1.39121669 | 0.164159728 | 0.36935939 |
| 11-13 | 5-7 | -0.8811039 | 0.378261586 | 0.51581125 |
| 20-22 | 5-7 | -1.7622078 | 0.078034194 | 0.19508549 |
| 3-5 | 5-7 | 0.41736501 | 0.676411447 | 0.80101356 |
| 30-31 | 5-7 | -1.66946002 | 0.095026246 | 0.22506216 |
| 40-42 | 5-7 | -1.90132947 | 0.057258871 | 0.16104057 |
| 0-1 | 7-9 | 0.97385168 | 0.330130188 | 0.49519528 |
| 1-3 | 7-9 | 1.11297335 | 0.265719875 | 0.45989978 |
| 11-13 | 7-9 | -1.15934724 | 0.246314673 | 0.46184001 |
| 20-22 | 7-9 | -2.04045114 | 0.041305413 | 0.14298027 |
| 3-5 | 7-9 | 0.13912167 | 0.889354006 | 0.95287929 |
| 30-31 | 7-9 | -1.94770336 | 0.051450468 | 0.1543514 |
| 40-42 | 7-9 | -2.17957281 | 0.029289142 | 0.14644571 |
| 5-7 | 7-9 | -0.27824334 | 0.780825569 | 0.87842877 |
| 0-1 | 9-11 | 1.85495558 | 0.06360257 | 0.16835974 |
| 1-3 | 9-11 | 1.99407725 | 0.046143613 | 0.14831876 |
| 11-13 | 9-11 | -0.27824334 | 0.780825569 | 0.90095258 |
| 20-22 | 9-11 | -1.15934724 | 0.246314673 | 0.44336641 |
| 3-5 | 9-11 | 1.02022557 | 0.307621493 | 0.49439169 |
| 30-31 | 9-11 | -1.06659946 | 0.286152744 | 0.47692124 |
| 40-42 | 9-11 | -1.29846891 | 0.194126254 | 0.39707643 |
| 5-7 | 9-11 | 0.60286056 | 0.546601452 | 0.66478555 |
| 7-9 | 9-11 | 0.8811039 | 0.378261586 | 0.53193035 |

Table S3 | **Results of the Kruskal-Wallis test performed on the abundance of *Candidatus* Electrotrhix, based on the 13 partial 16S rRNA gene sequences identified in samples from Koljö Fjord stratified by depth. Duncan's test was conducted on Kruskal-Wallis multiple comparison p-values, which were adjusted using the Benjamini-Hochberg method.**

| **Depth** | **Comparison [cm]** | **Z** | **P.unadj** | **P.adj** |
| --- | --- | --- | --- | --- |
| 0-1 | 1-3 | -1.5802906 | 0.1140403312 | 0.285100828 |
| 0-1 | 20-22 | 0.837068 | 0.4025543276 | 0.503192909 | |
| 1-3 | 20-22 | 2.4173586 | **0.0156336053** | **0.078168026** |
| 0-1 | 30-32 | 1.9523208 | **0.0509001249** | 0.152700375 |
| 1-3 | 30-32 | 3.5326114 | **0.0004114768** | **0.006172151** |
| 20-22 | 30-32 | 1.1152528 | 0.2647421033 | 0.397113155 |
| 0-1 | 7-9 | -0.6845692 | 0.4936158383 | 0.569556736 |
| 1-3 | 7-9 | 0.8957214 | 0.3704015517 | 0.505093025 |
| 20-22 | 7-9 | -1.5216372 | 0.1281000146 | 0.274500031 |
| 30-32 | 7-9 | -2.63689 | **0.0083669961** | **0.062752471** |
| 0-1 | 9-11 | 0.5865342 | 0.5575166144 | 0.59733923 |
| 1-3 | 9-11 | 2.1668248 | **0.0302482188** | 0.11343082 |
| 20-22 | 9-11 | -0.2505339 | 0.8021745106 | 0.802174511 |
| 30-32 | 9-11 | -1.3657867 | 0.172005928 | 0.322511115 |
| 7-9 | 9-11 | 1.2711033 | 0.2036918979 | 0.339486497 |

**References**

Bushmanova, E., Antipov, D., Lapidus, A., Prjibelski, A.D., 2019. rnaSPAdes: a *de novo* transcriptome assembler and its application to RNA-Seq data. GigaScience 8, giz100. <https://doi.org/10.1093/gigascience/giz100>

Chen, Y.-L., Lee, C.-C., Lin, Y.-L., Yin, K.-M., Ho, C.-L., Liu, T., 2015. Obtaining long 16S rDNA sequences using multiple primers and its application on dioxin-containing samples. BMC Bioinformatics 16, S13. https://doi.org/10.1186/1471-2105-16-S18-S13

Aroney, S.T.N., Newell, R.J.P., Nissen, J.N., Camargo, A.P., Tyson, G.W., Woodcroft, B.J., 2025. CoverM: read alignment statistics for metagenomics. Bioinformatics 41, btaf147. https://doi.org/10.1093/bioinformatics/btaf147

Hermans, M., Stranne, C., Broman, E., Sokolov, A., Roth, F., Nascimento, F.J.A., Mörth, C.-M., Ten Hietbrink, S., Sun, X., Gustafsson, E., Gustafsson, B.G., Norkko, A., Jilbert, T., Humborg, C., 2024. Ebullition dominates methane emissions in stratified coastal waters. Science of The Total Environment 945, 174183. https://doi.org/10.1016/j.scitotenv.2024.174183
