# Supplementary material for: Evidence for cable bacteria inhabiting deep in anoxic sediment reveals a novel ecological niche
Source: Research Square preprint supplement (doi:10.21203/rs.3.rs-6914568/v1), 2025-07-02
Supplement: Supplementary file 2 [file 50fb6c35e0ee14808e0f2adb.xlsx]

## Sheet: List_16s_rRNA_Phylogenetic_tree
	Cable bacteria	ID	Origin	Clusters
1	Bacterium_enrichment_culture_clone_WH1-20	KF771006.1	Little Sippewissett salt marsh	VI
2	C_Electrothrix__rattekaaiensis_isolate_Rat3	GCA_032595675.1	Rattekaai	VI
3	C_Electrothrix_aarhusensis_isolate_MCF	GCA_004028505.1	Aarhus Bay	VI
4	C_Electrothrix_communis_isolate_A1	GCA_004028485.1	Aarhus Bay cable garden enrichment	VI
5	C_Electrothrix_communis_RB	GCA_030644725.1	MIMAG Metagenome-assembled Genome sample from Candidatus Electrothrix communis	VI
6	C_Electrothrix_gigas_isolate_AS4_5	GCA_022765825.1	Netherlands: Oude Bietenhaven	VI
7	C_Electrothrix_gigas_isolate_AUS3	GCA_022765875.1	Australia: Yarra River	VI
8	C_Electrothrix_gigas_isolate_AW1	GCA_022765985.1	Netherlands: Mokbaai	VI
9	C_Electrothrix_gigas_isolate_AW2	GCA_022765945.1	Netherlands: Mokbaai	VI
10	C_Electrothrix_gigas_isolate_AW3_4	GCA_022766005.1	Netherlands: Mokbaai	VI
11	C_Electrothrix_gigas_isolate_AW5	GCA_022766025.1	Mokbaai	VI
12	C_Electrothrix_gigas_isolate_AX2	GCA_022766065.1	De Cocksdorp, Texel	VI
13	C_Electrothrix_gigas_isolateHY10-6	GCA_037901825.1	Rattekaai, Eastern Scheldt river, Netherlands	VI
14	C_Electrothrix japonica	KR912349	Tokyo Bay	VI
15	C_Electrothrix_laxa_HOU	GCA_942492895.1	Hou	VI
16	C_Electrothrix_marina_isolate_A2	GCA_004028515.1	Aarhus Bay 2	VI
17	C_Electrothrix_marina_isolate_A3	GCA_004028525.1	Aarhus Bay 2	VI
18	C_Electrothrix_marina_isolate_A5	GCA_004028495.1	Aarhus Bay 2	VI
19	C_Electrothrix_scaldis_GW3-3	GCF_033584155.1	Rattekaai	VI
20	C_Electrothrix_sp._AR1	GCA_022765785.1	St. 130, North Sea	VI
21	C_Electrothrix_sp._AR3	GCA_022765765.1	St. 130, North Sea	V
22	C_Electrothrix_sp._AR4	GCA_022765725.1	St. 130, North Sea	IV
23	C_Electrothrix_sp._AR5	GCA_022765745.1	St. 130, North Sea	VI
24	C_Electrothrix_sp._ATG1	GCA_022765905.1	Lake Grevelingen	VI
25	C_Electrothrix_sp._ATG2	GCA_022765965.1	Lake Grevelingen	VI
26	C_Electrothrix_sp._AUS1_2	GCA_022765865.1	Yarra river	VI
27	C_Electrothrix_sp._AUS4	GCA_022765925.1	Yarra river	VI
28	C_Electrothrix_sp._AX1	GCA_022766045.1	De Cocksdorp, Texel	VI
29	C_Electrothrix_sp._EH2	GCA_022765845.1	Elkhorn Slough	VI
30	C_Electrothrix_sp._GM3_4	GCA_022765805.1	Gulf of Mexico (Geelhoed)	VI
31	C_Electrothrix_sp_AX5	GCA_022766085.1	De Cocksdorp, Texel	VI
32	C_Electrothrix_sp_gigas_isolate_AU1_5	GCA_022766165.1	Rattekaai	VI
33	C_Electrothrix_sp_LOE2	GCA_022766145.1	Loegten strand, Central Jutland	VI
34	C_Electrothrix_sp_MAN1_4	GCA_022766125.1	Western Port, Victoria	VI
35	C_Electrothrix_aestuarii_isolate_Rat1	GCA_032595685.2	Rattekaai	VI
36	C_Electrothrix_sp.GW3-4	GCF_037902255.1	Rattekaai	VI
37	Unc_bacterium_New_Zealand_cold_seep_clone_NZ_309_Bac60	JF268391.1	JF268391	V
38	Uncultured_bacterium_clone_EzlYyy25	KX172796.1	Gulf of Mexico (Yang)	VI
39	Uncultured_bacterium_clone_SIP12C_2I	KF741578.1	Huntington Beach, CA, USA	VI
40	Uncultured_bacterium_cloneSZB64	AM176869.1	Futian mangrove swamp	VI
41	Uncultured_delta_proteobacterium_clone_A33	GQ249497.1	Bay of Cadiz	VI
42	Uncultured_Desulfobulbaceae_Ar-cDNA-16S-P1-48	KR814256.1	Mud volcano, Mound 12	V
43	Uncultured_Desulfobulbaceae_bacterium_clone_CH4-cDNA-16S-P1-95	KR814208.1	Mud volcano, Mound 12	IV
44	FN396626	FM179901	Smeerenburgfjorden, Svalbard	V
45	FN396640	FN396640	Smeerenburgfjorden, Svalbard	V
46	FN396662	FN396640	Smeerenburgfjorden, Svalbard	V
47	FN554120	FN554120	Logatchev hydrothermal vent field, Anya's garden	V
48	FN554128	FN554128	Logatchev hydrothermal vent field, Anya's garden	V
49	Ca. Electrothrix communis	KR912344	Aarhus Bay 2	VI
50	Ca. Electrothrix aarhusiensis	KR912338	Aarhus Bay 2	VI
51	Ca. Electrothrix marina	KR912340	Aarhus Bay 2	VI
52	Uncultured bacterium clone New_Zealand_cold_seep	JF268345	Hikurangi margin, Wairarapa - Takahae	VI
53	Uncultured bacterium clone New_Zealand_cold_seep	JF268348	Hikurangi margin, Wairarapa - Takahae	VI
54	Candidatus Electronema halotolerans isolate LOGT-cMAG	GCA_942493095	Loegten strand, Central Jutland, Denmark	II
55	Candidatus Electronema sp. clone SI1	PQ214940 / SI1	Magazzolo river, Sicily S=2.4	II
56	Candidatus Electronema sp. clone YR	PQ214942 / YR	Yarra River	II
57	OR244131	FQ658831	Mungi Lake	I
58	OR244071	GA_A6_ccs1517	Ballona wetland, LA	I
59	Candidatus Electronema palustre_Gib-F4		Giber river, Eastern Jutland, Denmark	I
60	Candidatus Electronema aureum isolate ENR-cMAG	GCA_942492785.1	Laboratory enrichment culture, Denmark	I
61	Uncultured Desulfobulbaceae bacterium clone SI2	PQ214939 / SI2	Magazzolo river, Sicily S=3	III
62	Desulfobulbus alkaliphilus DSM24258	GCA_016918545		Desulfobulbaceae
63	Desulfocapsa sulfexigens DSM 10523	CP003985		Desulfobulbaceae
64	Desulfotalea psychrophila LSv54	CR522870.1		Desulfobulbaceae
65	Desulforhopalus singaporensis	AF118453.1		Desulfobulbaceae
66	Desulfobulbus elongatus strain FP	NR_029305.1		Desulfobulbaceae
67	Desulfobulbus propionicus DSM 2032	CP002364.1		Desulfobulbaceae
68	Desulfogranum marinum_DSM 2058	GCA_016918565.1		Desulfobulbaceae
69	Desulfogranum japonicum strain Pro1	NR_040977.1		Desulfobulbaceae
70	Desulfurivibrio alkaliphilus strain AHT	NR_044206.1		Desulfobulbaceae
71	Desulfopila aestuarii strain MSL86	NR_040976.1		Desulfobulbaceae
72	Desulfomarina profundi_KT2	NR_179352.1		Desulfobulbaceae
73	Desulfolithobacter dissulfuricans_GF1	NR_184634.1		Desulfobulbaceae
74	Desulfobulbus oligotrophicus_Prop6	NR_156089.1		Desulfobulbaceae
75	Geobacter sulfurreducens_PCA	NR_075009.1		Desulfobulbaceae
