# Supplementary material for: Evidence for cable bacteria inhabiting deep in anoxic sediment reveals a novel ecological niche
Source: Research Square preprint supplement (doi:10.21203/rs.3.rs-6914568/v1), 2025-07-02
Supplement: Supplementary file 3 [file 7b22657351e80fc73b00310f.xlsx]

## Sheet: KEGG_Genes
Genes	Kristineberg_0–1	Kristineberg_1–3	Kristineberg_7–9	Kristineberg_9–11	Kristineberg_20–22	Kristineberg_30–32	Kristineberg_0–2	Kristineberg_2–3	Kristineberg_7–9	Kristineberg_9–11	Kristineberg_20–22	Kristineberg_30–32	Kristineberg_0–2	Kristineberg_2–3	Kristineberg_7–9	Kristineberg_9–11	Kristineberg_20–22	Kristineberg_30–32	Koljö.Fjord_0–1	Koljö.Fjord_1–3	Koljö.Fjord_7–9	Koljö.Fjord_9–11	Koljö.Fjord_20–22	Koljö.Fjord_30–32	Koljö.Fjord_0–1	Koljö.Fjord_1–3	Koljö.Fjord_7–9	Koljö.Fjord_9–11	Koljö.Fjord_20-22	Koljö.Fjord_30-32	Koljö.Fjord_0–1	Koljö.Fjord_1–3	Koljö.Fjord_7–9	Koljö.Fjord_9–11	Koljö.Fjord_20-22	Koljö.Fjord_30-32	Offshore_1_0-1	Offshore_1_1-3	Offshore_1_3-5	Offshore_1_5-7	Offshore_1_7-9	Offshore_1_9-11	Offshore_1_11-13	Offshore_1_20-22	Offshore_1_30-31	Offshore_1_40-42	Offshore_2_0-1	Offshore_2_1-3	Offshore_2_3-5
K15632 23S rRNA (adenine-C8)-methyltransferase [EC:2.1.1.224]	0	0	0	0	0	0	0	0	0	0	0	0	0	0	0	0	0	0	0	0	0	0	0	0	0	0	0	0	0	0	0	0	0	0	0	0	0	0	0	0	0	0	0	0	0	0	0	0	0
K18471 methylglyoxal reductase [EC:1.1.1.-]	29	7	6	3	11	7	4	6	8	5	3	21	13	6	4	10	26	11	7	5	4	15	33	29	5	10	21	13	31	23	14	9	17	5	25	21	7	4	7	1	3	3	4	2	6	8	3	7	4
K13489 chemotaxis-related protein WspD	0	0	0	0	1	0	0	1	0	0	0	0	0	0	0	0	0	0	1	0	0	0	0	0	2	0	2	0	0	0	0	0	0	0	0	0	4	0	0	0	0	0	2	0	0	1	0	0	0
K13658 beta-1,4-mannosyltransferase [EC:2.4.1.251]	1	0	0	0	0	0	0	1	0	0	0	0	1	1	0	0	0	1	0	0	1	0	0	0	0	0	0	0	0	0	0	0	0	0	0	0	0	0	0	0	0	0	0	0	0	2	0	0	0
K21804 protein N-lysine methyltransferase METTL21A [EC:2.1.1.-]	0	0	0	0	0	0	0	0	0	0	0	0	0	0	0	0	0	0	1	0	1	0	0	0	0	0	0	0	0	0	2	0	0	0	0	0	0	0	0	0	0	0	0	0	0	0	1	1	1
K19449 XRE family transcriptional regulator, master regulator for biofilm formation	0	0	0	0	0	0	0	0	0	0	0	0	0	0	0	0	0	0	0	0	0	2	0	0	0	0	0	0	2	0	0	0	3	0	0	0	0	2	3	0	1	0	0	0	0	0	0	0	1
K14578 naphthalene 1,2-dioxygenase ferredoxin component	1	0	0	0	0	1	1	2	0	0	2	0	3	4	1	0	0	3	0	0	0	0	0	0	1	0	0	1	1	0	0	0	0	0	0	0	0	0	1	1	1	0	0	0	1	0	0	0	0
K10009 L-cystine transport system permease protein	1	2	3	0	4	5	1	5	0	1	3	9	1	2	4	0	0	2	5	0	3	0	16	23	2	2	1	3	10	27	0	0	0	4	39	26	0	1	2	1	0	2	2	3	0	9	0	2	2
K01197 hyaluronoglucosaminidase [EC:3.2.1.35]	1	0	1	0	0	7	1	0	2	1	0	0	0	0	0	0	1	0	1	0	0	0	3	1	2	0	0	0	0	0	1	0	8	0	0	0	1	0	0	0	0	0	0	0	0	0	0	0	0
K21146 vitamin D 1,25-hydroxylase [EC:1.14.15.22]	0	0	0	0	0	0	1	0	0	0	0	0	1	0	0	0	0	0	0	0	0	0	0	0	0	0	0	0	0	0	0	0	0	0	0	0	0	0	0	0	0	0	0	0	0	0	0	0	0
K13892 glutathione transport system ATP-binding protein	8	2	1	1	0	0	1	5	0	0	0	0	3	2	0	0	0	1	0	1	0	1	4	0	0	3	0	1	5	19	1	0	0	0	0	0	3	1	0	0	0	0	0	0	0	0	0	0	0
K09911 uncharacterized protein	0	0	0	0	0	0	0	0	0	0	0	0	2	0	0	0	0	0	0	0	0	0	0	0	0	0	0	0	0	0	0	0	0	0	0	0	0	0	0	0	0	0	0	0	0	0	0	0	0
K09496 T-complex protein 1 subunit delta	16	9	6	12	55	128	9	7	20	16	74	134	0	10	2	24	97	85	7	14	29	52	149	243	10	5	25	43	190	351	11	8	40	61	207	49	7	14	23	8	69	39	53	28	43	96	7	8	14
K04035 magnesium-protoporphyrin IX monomethyl ester (oxidative) cyclase [EC:1.14.13.81]	0	4	0	0	0	0	0	0	0	0	0	0	2	0	3	0	0	0	0	5	4	4	0	0	7	5	0	0	0	0	7	1	0	0	0	0	10	4	9	2	3	2	5	2	2	0	5	3	6
K02594 homocitrate synthase NifV [EC:2.3.3.14]	6	13	7	5	19	18	14	8	13	5	16	22	6	12	12	6	41	20	6	7	7	13	79	76	14	0	5	20	32	78	4	3	6	24	60	27	8	6	6	2	9	10	8	10	8	4	6	7	3
K21159 epoxide hydrolase	5	7	2	0	1	5	1	1	1	0	0	0	12	2	3	4	0	2	0	0	1	1	0	6	0	0	0	2	2	0	4	3	0	0	1	4	1	1	0	0	0	0	0	0	0	0	0	1	2
K22705 hopanoid C-2 methylase [EC:2.1.1.-]	0	0	2	0	0	0	0	0	0	0	0	0	0	0	0	0	0	0	0	0	0	0	0	0	0	0	0	0	0	0	0	0	0	3	0	0	0	1	0	0	0	0	0	0	0	0	0	0	0
K13606 chlorophyll(ide) b reductase [EC:1.1.1.294]	0	0	0	0	0	0	0	1	0	0	2	5	0	0	1	12	0	1	0	0	0	0	5	10	2	0	0	1	4	0	0	0	0	3	0	0	0	0	0	0	0	0	2	1	1	0	0	0	0
K18244 acyl-CoA dehydrogenase [EC:1.3.99.-]	69	145	85	56	122	138	58	76	83	63	121	149	84	105	82	92	157	160	100	53	139	149	391	343	83	68	109	126	323	419	81	52	109	190	425	289	90	59	85	30	91	74	72	62	56	59	48	57	53
K01529 inosine/xanthosine triphosphatase [EC:3.6.1.73]	0	0	0	1	0	0	0	0	0	0	0	0	0	0	0	0	0	0	0	0	0	0	0	0	1	0	0	1	0	0	1	0	0	0	0	0	0	0	0	0	0	0	0	0	0	0	0	0	0
K03644 lipoyl synthase [EC:2.8.1.8]	57	22	25	13	17	13	26	23	10	16	19	11	38	29	18	8	30	22	8	12	25	23	62	75	25	18	24	22	62	106	33	15	18	25	100	56	18	24	32	11	20	10	22	14	32	21	20	13	16
K09869 aquaporin-8	0	0	0	1	0	0	2	0	0	0	0	0	0	1	0	0	0	0	0	0	0	0	0	0	1	1	0	0	0	0	0	0	0	0	0	0	0	0	0	0	0	0	0	0	0	0	0	0	0
K07103 uncharacterized protein	0	0	0	0	0	2	0	0	0	1	0	1	0	0	0	0	0	0	0	0	2	4	9	5	0	0	0	0	5	8	0	0	0	0	12	12	0	0	0	2	3	1	2	0	1	3	0	0	0
K02933 large subunit ribosomal protein L6	242	133	59	44	108	97	124	147	76	55	120	119	204	133	75	53	177	104	105	47	89	106	192	236	233	71	71	74	266	459	227	29	57	98	296	145	218	73	95	36	105	62	62	48	61	64	106	77	50
K21831 cholinesterase	2	0	0	0	1	0	0	0	0	1	0	0	0	0	1	0	0	0	0	0	0	0	0	0	0	0	0	0	0	0	0	1	0	0	0	0	3	0	0	0	0	0	0	0	0	0	0	0	0
K09733 (5-formylfuran-3-yl)methyl phosphate synthase [EC:4.2.3.153]	0	0	0	0	3	0	0	0	2	0	0	5	0	0	0	0	0	1	1	0	2	0	0	4	0	0	3	2	3	21	0	1	3	1	0	13	0	1	1	3	9	4	2	1	5	1	3	1	0
K06918 uncharacterized protein	0	0	0	0	0	0	0	1	0	1	0	0	0	0	0	0	0	0	0	0	0	0	0	0	0	1	2	0	9	0	1	0	0	0	0	0	38	10	1	1	0	0	0	2	0	0	21	3	4
K21898 ornithine racemase [EC:5.1.1.12]	4	2	1	3	8	14	2	2	0	0	2	13	2	4	1	0	7	7	4	1	4	9	13	7	1	6	2	2	3	8	2	0	13	1	9	8	4	4	0	0	9	0	2	7	4	4	7	0	0
K15229 methylamine dehydrogenase heavy chain [EC:1.4.9.1]	4	0	0	0	0	0	5	0	0	0	0	0	3	1	0	0	0	0	0	0	0	0	0	0	0	0	0	0	0	0	0	1	0	0	0	0	0	0	0	0	0	0	0	0	0	0	0	0	0
K19280 succinyl-CoA:mesaconate CoA transferase [EC:2.8.3.26]	0	7	3	0	2	2	0	4	5	2	10	7	1	6	5	0	0	5	6	0	3	3	4	4	4	0	0	1	13	27	2	1	0	5	7	9	0	0	2	1	2	2	3	3	0	1	1	1	1
K06984 beta-ribofuranosylaminobenzene 5'-phosphate synthase [EC:2.4.2.54]	2	0	0	2	3	8	3	3	1	5	20	1	1	0	1	0	10	10	0	1	11	16	46	32	3	1	6	14	21	76	3	0	5	36	48	18	2	0	2	2	15	5	8	7	10	26	0	3	3
K01200 pullulanase [EC:3.2.1.41]	24	23	8	2	18	15	9	12	7	22	10	9	7	18	7	7	14	24	10	3	5	9	22	7	6	1	8	12	12	3	16	6	3	11	2	0	7	8	6	2	4	4	8	2	6	7	5	5	5
K07060 endoribonuclease Nob1 [EC:3.1.-.-]	0	0	0	0	0	3	0	0	0	0	0	2	0	0	0	0	0	0	0	0	1	0	0	3	0	1	0	0	3	4	0	0	1	0	0	0	0	1	0	0	0	1	0	0	0	1	0	0	0
K01666 4-hydroxy 2-oxovalerate aldolase [EC:4.1.3.39]	29	61	24	32	29	33	32	26	37	16	22	32	13	37	33	20	70	31	15	7	23	26	93	60	22	16	18	21	55	65	29	9	19	22	73	95	16	16	12	4	16	20	9	9	9	19	18	19	13
K17103 CDP-diacylglycerol---serine O-phosphatidyltransferase [EC:2.7.8.8]	21	15	17	13	9	10	18	21	24	9	22	13	13	12	11	18	11	16	11	14	8	7	32	30	25	10	10	23	41	38	31	7	13	18	60	44	9	16	8	7	14	11	12	11	12	14	18	12	5
K13482 xanthine dehydrogenase large subunit [EC:1.17.1.4]	20	15	0	4	4	14	7	6	1	4	10	1	11	5	2	0	0	10	12	12	7	4	21	3	5	1	16	2	15	5	18	0	0	9	29	14	2	4	3	1	7	1	5	5	3	0	3	8	1
K00067 dTDP-4-dehydrorhamnose reductase [EC:1.1.1.133]	25	18	15	8	22	21	10	35	23	8	45	40	21	18	15	14	70	34	25	7	32	38	123	81	25	12	36	28	43	80	30	10	27	26	82	94	48	15	14	7	20	21	21	14	19	16	9	24	18
K13650 MqsR-controlled colanic acid and biofilm protein A	1	0	0	0	0	0	0	0	0	0	0	0	0	0	0	0	0	0	0	0	0	0	0	0	0	0	0	0	0	0	0	0	0	0	0	0	0	1	0	0	0	0	0	1	0	0	0	0	0
K09935 N-glycosidase YbiA [EC:3.2.2.-]	4	1	1	1	5	2	2	6	0	1	2	2	0	0	1	0	0	1	2	2	0	1	0	0	0	0	0	0	0	0	4	0	0	1	0	0	10	2	1	0	0	0	1	0	0	0	12	6	1
K08155 MFS transporter, DHA1 family, solute carrier family 18 (vesicular amine transporter), member 1/2	0	0	0	0	0	4	0	0	0	0	0	0	0	0	0	0	12	0	0	0	0	0	0	0	0	0	0	0	0	0	0	0	0	0	0	0	0	0	0	0	0	0	0	0	0	0	0	0	0
K21886 ArsR family transcriptional regulator, nickel/cobalt-responsive transcriptional repressor	2	0	1	0	0	0	0	0	0	0	0	0	1	1	0	0	0	0	0	0	0	1	0	0	2	0	0	0	1	0	0	0	0	0	0	0	0	0	0	0	0	0	0	0	0	2	0	1	0
K08478 phosphoglycerate transport regulatory protein PgtC	11	10	3	1	5	3	2	10	7	1	4	5	9	5	2	0	0	13	0	1	3	3	5	3	2	2	2	2	0	7	2	0	1	0	14	0	0	1	1	0	0	0	0	0	1	2	0	0	0
K02385 flagellar protein FlbD	0	0	1	3	0	4	2	5	0	6	1	4	0	1	2	20	0	0	4	2	3	0	3	5	1	0	0	6	5	7	3	0	2	8	15	4	1	1	5	0	2	0	0	3	4	4	1	1	1
K09984 uncharacterized protein	1	5	0	0	0	0	1	0	0	0	0	0	3	0	0	0	0	0	1	0	0	0	0	0	0	0	0	0	0	0	0	0	0	0	0	0	0	0	0	0	0	0	0	0	0	0	0	0	0
K15396 tRNA (cytidine32/uridine32-2'-O)-methyltransferase [EC:2.1.1.200]	8	6	1	0	0	2	3	8	0	3	0	0	3	5	9	5	0	0	2	0	0	0	12	2	3	0	5	1	3	9	2	1	0	2	9	0	4	1	5	1	2	2	0	1	0	0	1	2	7
K11418 histone deacetylase 11 [EC:3.5.1.98]	3	1	0	0	1	6	1	0	0	0	1	4	0	0	3	0	0	2	0	0	2	4	15	6	1	4	1	4	9	8	0	0	0	5	7	0	2	0	0	0	8	1	1	0	1	0	0	1	1
K04802 proliferating cell nuclear antigen	0	4	3	2	18	39	0	1	7	2	24	35	0	3	3	7	43	26	0	11	6	8	104	76	6	3	21	27	46	72	10	2	21	24	75	47	2	6	9	11	27	15	14	6	12	17	1	4	6
K15765 toluene monooxygenase electron transfer component [EC:1.18.1.3]	0	1	0	0	0	0	0	0	0	0	0	0	0	0	0	0	0	0	0	0	0	0	0	0	0	0	0	0	0	0	0	0	0	0	0	0	0	0	0	0	0	0	0	0	0	0	0	0	0
K21024 c-di-GMP phosphodiesterase [EC:3.1.4.52]	2	2	0	0	0	0	3	2	1	0	0	2	1	2	1	0	0	0	1	1	0	0	0	15	3	0	1	0	2	0	0	0	0	0	0	0	1	1	0	0	0	0	0	0	1	0	0	0	2
K18361 phenylacetyl-CoA:acceptor oxidoreductase [EC:1.17.5.1 3.1.2.25]	7	12	1	5	5	6	25	15	3	0	4	4	4	20	0	1	0	8	0	2	1	1	8	16	1	3	0	0	5	14	0	2	11	0	33	2	0	1	0	1	0	0	1	0	0	0	0	0	0
K04518 prephenate dehydratase [EC:4.2.1.51]	2	13	1	4	13	4	11	7	6	0	3	15	7	3	1	0	1	6	1	1	7	16	13	36	8	1	3	0	19	25	4	4	1	15	27	12	4	9	6	1	6	3	3	1	6	0	2	2	2
K02568 nitrate reductase (cytochrome), electron transfer subunit	14	24	2	2	6	1	18	17	8	2	2	0	11	24	7	0	0	1	5	0	2	2	0	0	1	0	1	0	5	0	5	0	0	1	0	0	1	0	2	0	0	0	0	0	0	0	0	2	1
K17208 inositol transport system substrate-binding protein	12	2	4	0	5	9	1	3	7	3	9	12	1	4	4	6	7	16	1	0	2	1	7	15	5	0	1	1	15	18	3	2	1	0	13	0	2	2	4	0	0	1	0	0	0	0	0	2	2
K15870 3-oxocholoyl-CoA 4-desaturase [EC:1.3.1.115]	0	2	1	0	0	8	0	1	2	1	6	6	0	1	3	0	16	6	0	2	3	5	35	46	6	0	11	7	16	57	0	1	21	15	41	49	2	1	2	0	4	2	3	4	6	2	0	1	0
K18472 acetyl-CoA/propionyl-CoA carboxylase carboxyl transferase subunit [EC:6.4.1.2 6.4.1.3 2.1.3.15]	0	0	0	0	0	0	0	0	0	0	0	0	0	0	0	0	0	0	0	0	0	0	0	0	0	0	0	0	0	0	0	0	0	0	0	0	0	0	0	0	0	0	0	0	0	0	0	1	0
K14257 tetracycline 7-halogenase / FADH2 O2-dependent halogenase [EC:1.14.19.49 1.14.19.-]	6	0	0	0	0	0	2	3	1	0	0	0	4	1	0	0	0	0	0	0	0	0	3	0	0	0	0	0	0	0	1	0	0	0	0	0	0	1	0	0	0	0	0	0	0	0	0	0	0
K01989 putative tryptophan/tyrosine transport system substrate-binding protein	42	46	31	42	81	58	42	47	43	38	72	27	19	44	48	67	142	74	27	20	54	89	298	541	33	24	60	74	189	573	30	14	36	96	342	463	29	6	15	13	29	14	32	48	33	22	24	22	11
K03470 ribonuclease HII [EC:3.1.26.4]	13	15	14	8	19	15	5	13	9	5	15	8	13	16	13	12	9	15	4	9	20	26	38	78	8	11	12	24	51	96	20	7	11	11	67	60	20	9	16	9	24	13	14	8	12	17	12	2	12
K05577 NAD(P)H-quinone oxidoreductase subunit 5 [EC:7.1.1.2]	26	15	15	11	19	25	16	15	16	18	43	41	18	16	13	8	18	35	6	8	31	32	37	17	20	10	18	22	34	32	18	10	17	63	60	62	28	15	17	6	23	14	41	6	8	15	8	21	9
K11603 manganese transport system ATP-binding protein [EC:7.2.2.5]	2	2	0	2	1	9	1	0	0	0	5	11	0	5	1	0	5	11	0	0	1	0	10	11	0	0	0	0	7	12	0	0	3	5	15	23	2	0	2	0	1	0	1	0	0	3	0	0	1
K04076 ATP-dependent Lon protease [EC:3.4.21.53]	25	32	8	23	31	60	25	23	35	16	79	45	20	41	21	15	20	48	17	34	52	61	137	110	24	43	38	44	164	160	26	5	54	88	175	95	6	11	15	7	31	27	40	25	23	36	7	8	6
K01464 dihydropyrimidinase [EC:3.5.2.2]	43	41	18	21	25	39	33	27	15	28	41	26	43	37	12	12	62	35	18	14	26	41	121	110	22	14	30	32	63	134	27	13	22	21	78	70	21	10	16	6	15	8	13	20	28	29	15	16	14
K16474 intraflagellar transport protein 88	0	0	0	0	0	0	0	0	0	0	0	0	0	0	0	0	0	0	0	0	0	0	0	0	0	0	0	0	0	0	0	0	0	0	0	0	0	0	0	0	0	0	0	0	0	0	0	0	0
K18797 beta-lactamase class A PER [EC:3.5.2.6]	0	0	0	0	0	0	0	0	0	0	0	0	0	0	0	0	0	0	0	0	0	0	0	0	0	0	0	0	0	0	0	0	0	0	0	0	0	0	0	0	0	0	0	0	0	0	0	0	0
K17680 twinkle protein [EC:5.6.2.3]	1	0	2	0	0	0	0	0	0	0	0	0	0	0	0	0	0	0	0	0	0	0	0	0	0	1	0	0	0	0	0	0	0	0	0	0	0	0	0	0	0	0	0	0	0	0	0	0	0
K01829 disulfide reductase [EC:1.8.-.-]	18	3	4	5	3	10	9	19	17	2	1	2	13	9	10	20	9	4	2	1	3	6	0	1	16	4	4	1	4	4	13	1	3	7	7	0	14	13	18	3	2	6	2	7	2	0	4	2	11
K25137 23S rRNA (guanine2445-N2)-methyltransferase [EC:2.1.1.173]	1	1	0	0	0	0	1	0	0	0	1	0	0	2	0	0	0	0	0	3	0	0	0	0	2	1	0	0	0	0	3	0	0	0	0	0	0	2	0	0	2	0	0	3	0	0	0	0	1
K21170 enediyne biosynthesis protein CalE3	0	0	0	0	0	0	0	0	0	0	0	0	0	0	0	0	0	0	0	0	0	0	0	0	0	0	0	0	0	0	0	0	0	0	0	0	0	0	0	0	0	0	0	0	0	0	0	1	0
K01479 formiminoglutamase [EC:3.5.3.8]	3	3	2	1	0	0	2	2	2	0	0	0	5	2	2	0	0	1	1	1	3	12	3	3	5	1	3	0	5	0	1	4	4	0	0	21	2	3	2	0	0	0	2	1	0	1	3	0	1
K11687 poly(ADP-ribose) glycohydrolase ARH3 [EC:3.2.1.143]	4	1	1	3	2	4	2	8	2	0	5	13	5	3	1	2	0	7	2	2	6	8	10	15	2	5	4	4	16	29	3	1	10	12	15	42	2	0	1	2	3	0	15	4	2	1	6	10	1
K03637 cyclic pyranopterin monophosphate synthase [EC:4.6.1.17]	27	23	9	18	29	13	17	21	3	11	23	13	18	27	11	7	18	32	15	16	10	13	66	48	20	5	14	20	41	93	24	9	17	22	43	59	17	11	8	1	14	5	12	11	7	10	7	11	9
K13372 aralkylamine dehydrogenase heavy chain [EC:1.4.9.2]	0	0	0	0	0	0	1	0	0	0	0	0	0	0	0	0	0	0	0	0	0	0	0	0	0	0	0	0	0	0	0	0	0	0	0	0	0	0	2	0	0	0	0	0	0	0	0	0	0
K16515 4-oxalomesaconate hydratase [EC:4.2.1.83]	9	1	2	3	2	4	0	3	1	0	2	0	3	7	1	0	0	0	1	1	2	1	4	6	0	0	2	1	6	6	0	0	0	0	6	0	1	0	0	0	0	0	0	0	1	0	1	1	0
K16304 p-cumate 2,3-dioxygenase ferredoxin component	0	0	0	0	0	0	1	0	0	0	0	0	0	0	0	0	0	0	0	0	1	1	0	0	0	0	1	0	1	0	0	0	0	0	0	0	0	0	1	0	0	0	0	0	2	0	0	0	1
K09122 uncharacterized protein	5	8	5	8	2	4	6	10	4	1	6	4	7	5	5	2	0	7	0	0	3	6	14	15	1	4	6	15	28	43	2	8	0	15	25	37	0	0	2	3	5	3	3	5	10	6	3	1	3
K03653 N-glycosylase/DNA lyase [EC:3.2.2.- 4.2.99.18]	0	1	1	1	0	1	1	5	0	1	0	0	0	1	2	0	0	2	0	0	0	0	2	13	0	0	4	5	3	5	2	0	0	4	5	1	0	1	5	0	0	1	0	1	1	0	0	2	0
K00782 L-lactate dehydrogenase complex protein LldG	2	0	6	1	5	9	6	0	3	1	2	4	6	3	2	2	0	6	2	1	3	8	11	9	8	0	6	7	3	1	2	4	3	7	10	0	14	1	12	3	2	0	3	2	0	0	12	2	2
K21826 AraC family transcriptional regulator, glycine betaine-responsive activator	3	2	0	0	0	0	3	1	0	0	0	0	4	1	0	0	0	0	2	0	0	0	0	0	0	2	0	0	0	0	0	0	0	0	0	0	0	0	0	0	0	0	0	1	0	0	0	0	1
K13829 shikimate kinase / 3-dehydroquinate synthase [EC:2.7.1.71 4.2.3.4]	6	7	2	3	4	3	3	7	13	1	4	6	6	7	6	5	0	9	3	4	1	7	22	26	6	1	6	11	27	16	8	1	0	6	22	27	5	3	3	4	2	1	2	5	2	3	2	2	0
K01129 dGTPase [EC:3.1.5.1]	21	44	19	5	17	27	19	22	22	6	15	46	22	23	31	5	51	33	27	18	18	48	62	79	17	13	16	32	64	85	43	5	12	28	74	59	17	17	11	11	26	12	10	11	9	15	4	15	10
K18049 methylphosphonate synthase [EC:1.13.11.73]	0	0	0	0	0	0	0	0	0	0	0	0	0	0	0	0	0	0	3	0	0	0	0	0	0	0	0	0	0	0	0	0	0	0	0	0	0	0	0	0	0	0	0	0	0	0	0	0	0
K20523 SH3 domain-containing YSC84-like protein 1	33	12	5	6	7	13	12	14	3	4	16	2	29	10	8	28	0	24	6	1	8	4	33	16	14	3	8	17	50	74	10	5	4	5	20	11	19	8	4	0	8	1	4	6	9	2	7	5	6
K05541 tRNA-dihydrouridine synthase C [EC:1.-.-.-]	0	1	0	0	0	0	0	0	0	0	0	0	0	3	0	0	0	0	0	1	0	2	0	0	0	0	0	1	0	0	0	2	0	0	0	0	1	1	5	0	0	0	0	0	1	0	1	2	2
K12684 serine protease autotransporter [EC:3.4.21.-]	0	0	0	0	0	1	0	0	0	0	0	0	0	0	0	0	0	0	0	0	0	0	0	0	0	0	0	0	0	0	0	0	0	0	0	0	0	0	0	0	0	0	0	0	0	0	0	0	0
K03197 type IV secretion system protein VirB2	0	0	0	0	0	0	0	1	0	0	0	0	0	1	0	0	0	0	0	0	0	0	0	0	0	0	0	0	0	0	0	0	0	0	0	0	0	0	0	0	0	0	0	0	0	0	0	0	0
K16382 polyene macrolide polyketide synthase, loading module	2	0	0	0	0	0	0	0	0	0	0	0	0	0	0	0	0	0	0	0	0	0	0	0	0	0	0	2	0	0	0	0	0	0	0	0	0	0	0	0	0	2	0	0	0	0	0	0	0
K05592 ATP-dependent RNA helicase DeaD [EC:3.6.4.13]	73	71	26	25	74	126	42	53	46	52	105	91	68	60	27	7	18	156	23	18	44	33	133	71	80	21	20	28	117	118	91	25	29	34	78	67	136	101	177	194	301	251	691	354	336	66	75	105	148
K10084 ER degradation enhancer, mannosidase alpha-like 1	0	0	0	0	0	0	0	0	0	0	0	0	0	0	0	0	0	0	2	0	0	0	0	0	0	0	0	0	0	0	0	0	0	0	0	0	0	0	0	0	0	0	0	0	0	0	0	0	0
K05275 pyridoxine 4-dehydrogenase [EC:1.1.1.65]	41	35	19	10	29	21	20	21	21	8	20	20	42	33	21	8	22	30	10	14	22	29	53	45	16	15	20	25	26	98	13	9	22	27	50	97	7	13	10	6	11	8	8	17	9	8	10	17	3
K22153 fusarinine C N2-transacetylase	0	0	0	0	0	1	0	0	0	0	4	0	0	0	0	0	0	0	0	0	0	0	0	0	1	0	0	0	0	0	0	0	0	0	0	0	1	0	0	0	1	0	0	0	0	0	0	0	0
K04641 bacteriorhodopsin	2	1	0	0	0	0	0	0	0	0	0	0	0	0	0	0	0	0	0	0	0	0	0	0	0	0	0	0	0	0	0	0	0	0	0	0	0	2	1	1	0	0	0	0	0	0	2	2	1
K13931 malonate decarboxylase delta subunit	0	0	0	0	0	0	0	0	0	0	0	0	0	0	0	0	0	0	0	0	0	0	0	0	0	0	0	0	0	0	0	0	0	0	0	0	0	0	0	0	0	0	0	0	0	0	0	0	0
K01573 oxaloacetate decarboxylase (Na+ extruding) subunit gamma	1	2	1	2	0	0	1	0	0	0	0	0	0	0	1	5	0	0	0	0	0	0	0	0	3	1	0	0	5	0	1	0	1	0	0	0	1	1	0	0	0	0	0	0	0	0	1	0	2
K19099 metallo-beta-lactamase class B GIM [EC:3.5.2.6]	0	0	0	0	0	0	0	0	0	0	0	0	0	0	0	0	0	0	0	0	1	0	0	0	0	0	0	0	0	0	3	0	0	0	0	0	0	0	0	0	0	0	0	0	0	0	0	0	0
K10951 solute carrier family 12 (sodium/potassium/chloride transporter), member 2	5	6	2	4	8	8	2	6	9	2	3	5	6	11	8	2	0	4	5	6	6	7	16	10	13	7	4	10	5	4	12	5	9	21	12	6	8	1	5	3	12	5	2	1	2	3	0	8	8
K00986 RNA-directed DNA polymerase [EC:2.7.7.49]	888	1179	791	599	955	925	826	1081	809	599	960	752	666	957	760	514	880	929	546	628	730	958	1714	1393	756	516	629	707	1194	2109	783	456	702	979	1680	1035	667	580	525	567	617	514	1119	532	547	338	479	543	469
K13472 sulfotransferase	1	0	0	0	0	0	0	0	0	0	0	0	0	0	0	0	0	0	2	0	0	0	1	0	0	0	0	0	0	0	2	0	0	0	0	0	0	0	0	0	0	0	2	0	0	0	0	0	0
K08952 chlorosome envelope protein I	0	0	0	0	0	0	0	0	0	0	0	0	0	0	0	0	0	0	1	0	1	0	0	0	1	0	0	0	0	0	0	0	0	0	0	0	0	0	0	0	0	0	0	0	0	0	0	0	0
K00306 sarcosine oxidase / L-pipecolate oxidase [EC:1.5.3.1 1.5.3.7]	0	1	0	0	0	0	0	1	1	0	0	0	0	1	0	0	0	0	0	1	0	0	2	0	1	0	0	0	0	0	0	0	0	0	0	0	0	0	0	0	0	0	0	0	0	0	0	0	0
K11953 bicarbonate transport system ATP-binding protein [EC:7.3.2.-]	0	0	0	0	0	0	0	0	0	0	0	0	2	0	0	0	0	0	0	0	0	0	0	0	0	0	0	0	0	0	0	0	0	0	0	0	1	0	0	0	2	0	0	0	0	0	0	1	1
K04127 isopenicillin-N epimerase [EC:5.1.1.17]	7	8	4	0	7	3	1	2	7	2	2	1	5	4	8	0	1	3	5	3	3	3	7	20	1	2	4	4	1	23	2	0	6	3	25	1	2	1	2	1	1	3	1	1	2	0	1	0	2
K22969 glucose 1-dehydrogenase [EC:1.1.1.47]	0	1	0	0	7	0	0	0	0	3	1	0	0	0	1	0	0	1	0	0	0	0	0	3	0	0	0	0	0	9	0	0	0	2	5	0	1	0	1	0	0	0	0	1	0	0	1	1	0
K17214 inositol transport system permease protein	2	6	7	0	5	11	12	7	4	4	6	1	4	12	9	3	1	3	7	0	1	7	18	23	9	6	7	18	17	74	17	1	11	18	5	21	4	1	2	2	2	2	1	4	5	12	1	1	2
K10389 tubulin gamma	0	0	0	0	0	0	0	0	0	0	0	0	0	0	0	0	0	0	0	0	0	0	0	0	0	0	0	0	0	0	0	0	0	0	0	0	0	0	0	0	0	0	0	0	0	0	0	0	0
K12357 sialidase-2/3/4 [EC:3.2.1.18]	0	2	0	0	6	6	0	0	0	0	4	0	0	0	1	0	0	0	0	0	0	0	5	1	0	0	0	2	3	0	0	0	0	1	3	0	0	0	0	0	0	0	0	0	0	0	0	0	1
K14469 acrylyl-CoA reductase (NADPH) / 3-hydroxypropionyl-CoA dehydratase / 3-hydroxypropionyl-CoA synthetase [EC:1.3.1.84 4.2.1.116 6.2.1.36]	1	1	0	0	0	0	5	0	0	0	0	0	0	0	0	0	0	0	2	0	1	0	0	0	1	0	0	0	0	0	3	0	0	0	0	0	0	0	0	1	2	0	0	0	0	0	0	0	0
K18429 GDP/UDP-N,N'-diacetylbacillosamine 2-epimerase (hydrolysing) [EC:3.2.1.184]	3	8	0	0	0	6	3	5	1	3	5	1	4	4	0	0	0	12	4	1	1	3	12	14	2	6	0	2	4	16	5	0	1	14	16	10	4	1	2	0	4	4	0	7	0	2	0	1	5
K23508 galactofuranose transport system substrate-binding protein	0	0	1	2	0	0	1	0	0	0	0	1	3	0	0	0	0	0	3	1	3	1	1	0	1	2	0	4	2	4	2	0	0	0	0	0	1	2	1	1	1	1	0	1	0	2	0	1	3
K17994 sulfhydrogenase subunit delta [EC:1.12.1.3 1.12.1.5]	2	4	7	9	8	14	3	6	2	4	7	13	9	8	10	7	5	39	15	2	17	10	29	15	10	6	13	8	18	37	23	12	2	24	35	15	2	6	9	3	14	12	13	9	12	13	6	11	9
K12196 vacuolar protein-sorting-associated protein 4	3	2	1	2	17	21	1	4	3	6	8	14	3	13	0	5	20	27	6	1	10	12	104	80	4	2	4	19	29	175	2	6	10	26	77	82	1	3	2	5	15	13	11	6	3	9	3	1	2
K05574 NAD(P)H-quinone oxidoreductase subunit 3 [EC:7.1.1.2]	15	9	4	9	5	3	3	9	3	0	2	1	4	8	8	0	2	4	5	1	3	3	9	8	5	1	3	3	3	14	8	1	2	3	0	6	2	5	3	4	1	2	5	1	1	0	3	5	3
K23753 AMP-polyphosphate phosphotransferase [EC:2.7.4.33]	4	5	3	6	1	2	1	2	3	0	0	2	6	3	1	0	0	0	0	3	1	7	2	8	2	2	1	2	6	0	6	1	4	2	3	0	2	8	4	1	0	4	5	2	4	3	5	5	13
K21464 penicillin-binding protein 2D [EC:2.4.1.129 3.4.16.4]	7	16	11	9	7	10	11	15	10	13	9	27	12	6	13	7	15	13	6	15	7	17	35	54	12	5	5	12	19	41	17	0	8	5	39	36	4	4	14	7	12	9	16	8	15	6	3	11	13
K11437 type I protein arginine methyltransferase [EC:2.1.1.319]	1	0	0	0	0	2	2	1	0	0	1	0	0	1	0	0	0	0	0	0	0	0	0	3	1	0	0	3	3	3	0	0	0	1	0	0	0	0	0	0	0	0	0	0	0	0	1	1	1
K09833 homogentisate phytyltransferase / homogentisate geranylgeranyltransferase [EC:2.5.1.115 2.5.1.116]	1	0	0	0	0	0	0	0	0	0	0	0	0	0	0	0	0	0	0	0	0	1	0	0	0	0	0	0	0	0	0	0	0	0	0	0	1	0	0	0	0	0	0	0	0	0	0	0	0
K19135 CRISPR-associated protein Csx14	0	0	0	0	0	0	0	0	0	0	0	0	0	0	0	0	0	1	0	0	2	0	0	0	0	0	0	0	0	28	0	0	0	0	1	0	1	0	0	0	0	0	2	0	2	0	0	0	0
K11077 mannopine transport system substrate-binding protein	0	0	0	1	2	1	2	2	0	0	0	0	0	0	0	0	0	8	5	0	0	0	1	5	2	0	1	0	0	0	0	0	0	5	3	0	0	0	0	0	0	0	0	0	0	0	0	0	0
K17317 glucose/mannose transport system permease protein	5	1	0	1	1	9	6	1	1	3	8	13	0	4	1	4	5	1	4	2	4	12	14	9	4	1	3	6	15	42	2	2	13	2	13	1	0	1	2	1	2	1	2	2	2	4	0	3	1
K11753 riboflavin kinase / FMN adenylyltransferase [EC:2.7.1.26 2.7.7.2]	42	27	12	10	16	21	12	27	11	8	22	20	18	16	25	13	25	25	22	7	14	23	64	44	34	11	18	20	60	93	39	4	18	17	45	21	34	18	18	6	17	9	10	14	16	9	17	10	10
K00203 formylmethanofuran dehydrogenase subunit D [EC:1.2.7.12]	3	1	1	1	4	6	1	6	0	0	10	15	1	6	0	0	14	10	8	0	1	17	37	12	1	0	1	11	7	38	0	1	3	18	45	5	0	0	2	1	64	6	16	4	12	8	0	1	2
K06720 L-ectoine synthase [EC:4.2.1.108]	2	0	0	0	0	0	0	0	0	0	0	0	5	1	0	0	0	0	0	0	1	0	3	0	2	0	2	0	1	0	2	0	0	1	0	0	0	0	0	0	0	0	0	2	0	0	0	0	0
K03702 excinuclease ABC subunit B	52	47	25	8	53	40	17	20	20	17	30	47	24	40	17	10	8	48	11	13	33	41	127	90	38	12	37	30	109	197	33	8	34	49	155	164	17	27	32	24	37	22	26	23	24	40	10	30	19
K04103 indolepyruvate decarboxylase [EC:4.1.1.74]	12	8	0	1	0	2	20	3	2	6	1	2	15	6	2	4	0	3	0	0	0	0	0	3	1	0	0	3	8	0	2	1	0	3	40	3	0	8	5	0	2	1	0	0	0	0	6	1	1
K13552 paromamine 6'-oxidase [EC:1.1.3.43]	0	0	0	0	0	0	0	0	0	0	0	0	0	1	0	0	0	0	0	0	0	0	0	0	0	0	0	0	0	0	0	0	0	0	0	0	0	0	0	0	0	0	0	0	0	0	0	0	0
K10550 D-allose transport system permease protein	0	0	0	0	0	0	0	0	1	0	0	1	0	0	0	0	0	0	0	0	0	0	0	2	3	0	0	0	0	0	4	0	0	0	0	0	0	0	0	0	0	0	0	0	1	0	0	0	0
K14468 malonyl-CoA reductase / 3-hydroxypropionate dehydrogenase (NADP+) [EC:1.2.1.75 1.1.1.298]	1	0	0	0	0	0	0	3	0	0	0	0	0	0	0	0	0	0	0	0	0	0	0	0	1	0	0	0	0	0	0	0	0	0	0	0	0	0	0	0	0	0	0	0	0	0	0	0	0
K08321 3-hydroxy-5-phosphonooxypentane-2,4-dione thiolase [EC:2.3.1.245]	26	40	23	25	48	39	19	33	22	21	32	60	19	28	18	31	33	62	19	21	29	59	196	172	33	24	44	46	107	294	19	20	20	56	145	124	11	10	22	10	26	23	18	16	18	26	6	16	16
K06131 cardiolipin synthase A/B [EC:2.7.8.-]	34	17	7	4	7	9	15	15	5	8	0	3	16	10	5	2	0	2	8	2	6	4	6	0	10	7	5	14	5	3	25	10	3	3	3	2	7	5	11	2	7	10	4	2	1	0	9	12	6
K01185 lysozyme [EC:3.2.1.17]	1	8	0	0	1	0	4	5	0	1	0	0	1	2	0	0	0	1	0	0	0	0	1	0	1	0	1	1	1	3	3	0	1	0	0	0	5	0	1	1	1	0	2	1	0	0	0	1	1
K00469 inositol oxygenase [EC:1.13.99.1]	4	0	0	0	0	0	0	1	0	0	0	0	1	1	5	0	0	0	0	0	0	0	0	0	0	0	0	0	0	0	0	0	0	0	0	0	0	0	0	0	0	0	0	0	0	0	0	0	0
K22476 N-acetylglutamate synthase [EC:2.3.1.1]	0	0	0	0	0	0	0	0	0	0	0	0	0	0	0	0	0	0	0	0	0	0	0	0	0	0	0	0	0	0	0	0	1	0	0	0	0	0	0	0	0	0	0	0	0	0	0	1	0
K10819 histidine kinase [EC:2.7.13.3]	21	18	16	10	30	19	14	11	20	21	27	23	16	12	12	30	20	20	53	50	28	54	33	27	73	48	25	33	39	73	42	32	30	22	51	33	64	17	13	5	8	3	3	2	2	3	33	20	12
K03851 taurine-pyruvate aminotransferase [EC:2.6.1.77]	7	8	4	4	2	8	0	3	3	0	3	11	1	3	0	0	17	5	4	1	0	6	18	18	5	2	2	1	10	24	2	1	1	5	23	38	3	2	2	2	1	2	3	3	1	2	0	1	0
K03149 thiazole synthase [EC:2.8.1.10]	17	11	14	2	5	3	19	8	12	9	13	11	12	13	12	9	13	9	11	1	9	15	21	14	17	5	6	5	21	8	56	2	8	6	7	0	32	8	9	9	12	8	7	9	10	4	17	10	12
K01453 6-aminohexanoate-oligomer exohydrolase [EC:3.5.1.46]	11	4	0	3	4	5	2	4	0	1	3	0	12	2	1	0	4	1	0	0	2	7	1	5	5	2	1	1	2	0	1	0	0	2	0	9	0	1	4	0	0	0	1	0	0	0	0	0	0
K18054 2'-deoxymugineic-acid 2'-dioxygenase / mugineic-acid 3-dioxygenase [EC:1.14.11.24 1.14.11.25]	0	0	0	0	0	0	0	0	0	0	0	0	0	0	0	0	0	0	0	0	0	0	0	0	1	0	0	0	0	0	0	0	0	0	0	0	0	0	0	0	0	0	0	0	0	0	0	0	0
K01284 peptidyl-dipeptidase Dcp [EC:3.4.15.5]	32	20	17	12	15	37	26	21	16	9	16	20	40	28	15	9	1	29	11	10	18	17	47	70	24	20	28	19	39	86	22	12	15	17	16	24	33	14	17	8	8	12	8	9	7	4	6	16	10
K00257 acyl-ACP dehydrogenase [EC:1.3.99.-]	2	3	1	0	0	8	1	1	0	1	1	0	2	3	0	6	0	0	0	1	0	0	0	0	0	0	0	0	0	9	0	1	0	0	0	0	1	4	14	3	1	2	3	0	0	0	7	27	7
K07164 uncharacterized protein	30	22	6	18	10	20	22	30	34	15	25	17	23	29	21	4	15	14	13	14	15	14	58	91	21	19	13	17	47	121	31	16	20	18	54	51	24	31	29	11	17	18	12	17	13	14	21	16	9
K00926 carbamate kinase [EC:2.7.2.2]	56	56	73	48	42	56	45	50	45	26	50	80	44	48	91	41	35	48	22	17	22	48	66	112	37	19	26	31	98	118	41	19	23	49	85	119	19	23	29	24	20	10	26	37	17	41	16	29	22
K18289 itaconate CoA-transferase [EC:2.8.3.- 2.8.3.22]	5	9	0	1	4	2	7	5	5	0	1	0	2	1	3	0	0	4	1	3	0	7	13	27	3	1	7	2	8	18	0	2	1	6	10	1	1	0	0	0	1	2	0	0	1	0	0	1	0
K21323 tert-butyl alcohol monooxygenase / tert-amyl alcohol desaturase [EC:1.14.13.229 1.14.19.48]	2	10	1	0	0	0	4	2	2	0	0	0	9	9	0	0	0	0	0	0	0	0	0	0	0	0	0	0	0	0	2	0	0	0	0	0	0	0	0	0	0	0	0	0	0	0	0	1	0
K06420 small acid-soluble spore protein C (minor alpha/beta-type SASP)	0	0	0	1	0	0	0	0	0	0	0	3	0	2	0	0	0	0	3	5	1	6	5	0	2	0	0	1	2	0	0	6	7	2	0	2	0	1	1	3	0	0	0	0	2	0	0	1	2
K07283 putative salt-induced outer membrane protein	6	0	0	0	0	0	0	4	0	0	0	3	2	7	0	0	0	0	1	2	2	3	2	9	6	0	0	0	4	0	1	0	0	1	0	7	2	0	0	1	0	1	0	0	0	0	2	0	2
K21178 O-methyltransferase [EC:2.1.1.-]	0	0	0	0	0	0	0	0	0	0	1	0	0	0	0	0	0	0	0	0	0	1	0	0	0	0	0	0	0	0	0	0	0	0	0	0	2	0	0	0	0	0	0	0	0	0	0	0	0
K07097 uncharacterized protein	0	0	0	0	0	0	0	0	0	0	0	0	3	2	0	0	0	0	4	0	0	0	0	0	0	1	0	4	0	0	6	0	0	0	0	0	1	2	1	0	0	3	2	2	2	0	1	1	2
K22150 mevalonyl-CoA hydratase	0	0	0	0	0	0	0	0	0	0	0	0	0	0	0	0	0	0	0	0	0	0	0	0	0	0	0	0	0	0	0	0	0	0	0	0	0	0	0	0	0	0	0	0	0	0	0	0	1
K02779 glucose PTS system EIICB or EIICBA component [EC:2.7.1.199]	5	0	0	0	0	0	1	0	0	0	0	0	4	0	0	0	0	0	0	0	0	0	0	0	0	0	0	0	0	0	0	0	0	0	0	0	0	1	0	0	0	1	0	0	0	0	0	3	0
K20436 validamine 7-phosphate valienyltransferase [EC:2.5.1.135]	0	0	0	0	0	0	0	0	0	0	0	0	0	0	0	0	0	0	0	0	0	0	0	0	0	0	0	0	0	0	0	0	0	0	0	0	0	0	0	0	0	0	0	0	0	0	0	0	0
K23170 UDP-N-acetyl-alpha-D-muramoyl-L-alanyl-L-glutamate epimerase [EC:5.1.1.23]	0	0	0	0	0	0	0	0	0	0	0	0	0	0	0	0	0	0	0	0	0	0	0	0	1	0	0	1	0	0	1	0	0	0	0	0	0	0	0	0	0	0	0	0	0	0	0	0	0
K14331 fatty aldehyde decarbonylase [EC:4.1.99.5]	0	0	0	0	0	0	1	0	0	0	0	0	1	0	0	0	0	0	0	0	1	1	0	0	1	1	0	0	0	0	1	0	0	0	0	0	8	2	2	1	1	0	0	0	0	0	3	4	1
K02051 NitT/TauT family transport system substrate-binding protein	204	137	63	47	55	93	90	117	68	33	56	70	162	148	77	27	42	56	49	35	72	64	150	131	87	50	56	56	122	156	65	22	34	77	102	129	81	46	32	22	101	46	40	33	35	40	47	41	32
K07029 diacylglycerol kinase (ATP) [EC:2.7.1.107]	13	22	8	5	19	22	18	20	13	14	26	28	13	26	27	17	7	33	2	17	17	8	101	72	12	9	26	34	60	78	15	9	10	28	90	125	8	8	17	4	26	15	17	12	25	29	13	15	16
K03183 demethylmenaquinone methyltransferase / 2-methoxy-6-polyprenyl-1,4-benzoquinol methylase [EC:2.1.1.163 2.1.1.201]	70	30	24	19	28	29	35	43	16	30	35	38	52	33	17	25	75	42	32	28	55	43	79	106	33	20	29	39	83	222	34	23	26	58	145	69	33	40	31	11	31	15	34	33	16	21	22	20	21
K10807 ribonucleoside-diphosphate reductase subunit M1 [EC:1.17.4.1]	22	6	2	1	0	1	4	2	0	2	0	0	6	1	1	6	0	0	0	0	0	0	0	0	3	1	0	0	0	0	1	0	0	0	0	0	1	1	1	0	0	0	0	0	0	0	1	0	0
K05370 phycoerythrobilin:ferredoxin oxidoreductase [EC:1.3.7.3]	2	0	0	0	0	0	0	0	0	1	0	0	0	0	0	0	0	0	0	0	0	0	0	0	0	0	0	0	0	0	0	0	0	0	0	0	0	0	0	0	0	0	0	0	0	0	0	0	0
K00213 7-dehydrocholesterol reductase [EC:1.3.1.21]	1	0	0	0	0	0	0	0	0	0	0	0	1	0	0	0	0	0	0	0	0	1	0	0	0	0	0	0	0	0	0	0	0	0	0	0	0	0	0	0	0	0	0	0	0	0	0	0	0
K16669 protocadherin Fat 4	4	1	1	3	0	1	2	4	0	2	0	1	2	0	0	0	0	3	8	1	0	5	2	3	0	1	0	2	6	4	3	0	1	0	10	0	7	5	2	0	0	2	2	0	0	0	0	4	0
K11947 aldehyde dehydrogenase [EC:1.2.1.-]	0	0	0	0	1	0	0	0	0	0	1	0	1	1	1	5	0	0	0	0	0	0	0	0	0	0	0	0	0	0	0	0	0	0	0	0	0	0	0	0	0	1	0	0	0	0	1	0	0
K25097 alpha-galactoside transport system permease protein	0	0	0	0	0	0	0	0	0	0	0	0	0	0	0	0	0	0	0	0	0	0	0	0	0	0	0	0	0	0	0	0	0	0	0	0	0	0	0	0	0	0	0	0	0	0	0	0	0
K18907 GntR family transcriptional regulator, regulator for abcA and norABC	9	0	2	0	2	5	4	3	0	0	0	11	0	1	1	2	0	2	1	2	1	0	5	1	2	0	0	0	4	0	1	0	0	1	0	0	1	0	2	0	1	0	1	0	2	1	0	1	0
K02479 two-component system, NarL family, response regulator	34	28	9	10	25	39	13	21	13	12	20	19	26	23	27	14	9	20	11	9	17	25	59	102	16	15	36	28	42	121	14	9	23	23	61	42	9	14	11	17	25	13	9	7	7	11	13	14	10
K02201 pantetheine-phosphate adenylyltransferase [EC:2.7.7.3]	0	1	2	0	1	2	1	0	0	1	0	9	1	1	0	0	0	8	0	0	0	2	2	12	0	0	3	6	15	3	0	0	0	3	8	18	0	0	0	1	1	0	1	1	0	2	0	0	0
K16015 oxidoreductase [EC:1.1.1.-]	2	3	0	0	0	0	0	5	3	1	0	2	4	0	0	1	0	2	7	3	1	1	2	5	1	0	1	1	4	0	0	0	1	2	9	0	0	1	1	1	2	1	2	1	0	0	0	3	0
K00991 2-C-methyl-D-erythritol 4-phosphate cytidylyltransferase [EC:2.7.7.60]	7	17	4	9	12	22	6	8	8	2	12	12	8	14	5	5	12	12	11	5	8	14	56	64	17	3	7	10	12	119	10	5	19	18	54	58	32	77	26	37	110	117	685	162	9	14	31	34	71
K09837 carotenoid epsilon hydroxylase [EC:1.14.14.158]	0	0	0	0	0	0	0	0	0	0	0	0	0	0	0	0	0	0	0	0	0	0	0	0	0	0	0	0	0	0	0	0	0	0	0	0	0	0	0	0	0	0	0	0	0	0	0	0	0
K02770 fructose PTS system EIIBC or EIIC component [EC:2.7.1.202]	5	4	6	3	7	8	1	8	5	3	2	0	5	0	6	0	0	10	0	7	5	11	26	9	2	5	4	1	8	25	9	0	2	9	0	31	4	6	8	1	6	4	0	3	1	1	3	7	3
K10229 polyol transport system permease protein	4	6	12	6	5	2	3	12	3	5	4	0	5	4	14	0	0	1	3	2	6	12	6	4	4	10	7	9	16	9	3	9	5	11	12	15	7	3	0	0	0	0	2	2	3	2	2	2	2
K16108 nonribosomal peptide synthetase protein BlmX	0	0	0	0	0	0	0	0	0	0	0	0	0	1	0	0	2	0	0	0	0	0	0	0	0	0	0	0	0	0	0	0	0	2	0	0	0	0	0	0	0	0	0	0	0	0	0	0	0
K19239 predicted membrane protein	0	0	0	0	0	0	0	0	0	0	0	0	0	1	0	0	0	0	0	0	0	0	0	0	7	1	0	0	0	7	8	1	0	0	0	0	0	0	1	0	0	0	0	0	0	0	0	1	1
K13042 dimethylglycine N-methyltransferase [EC:2.1.1.161]	1	0	0	0	0	0	1	0	0	1	0	0	0	0	0	0	0	0	0	0	0	0	0	0	1	0	0	0	1	0	0	0	0	0	0	0	7	1	0	0	0	0	0	0	0	0	4	1	1
K02676 type IV pilus assembly protein PilZ	13	8	1	4	0	0	14	8	3	1	0	1	16	9	3	3	0	0	8	6	1	2	4	0	11	6	0	1	4	1	10	6	4	4	6	3	12	9	0	2	0	3	3	0	0	0	7	8	5
K13640 MerR family transcriptional regulator, heat shock protein HspR	8	12	2	5	14	9	8	11	3	2	2	5	5	6	4	0	3	8	6	1	3	2	42	22	3	4	3	1	29	32	15	2	1	5	19	5	6	3	11	6	8	11	7	5	13	6	1	11	7
K21219 hydroxymethylpyrimidine kinase / phosphomethylpyrimidine kinase / thiamine-phosphate diphosphorylase [EC:2.7.1.49 2.7.4.7 2.5.1.3]	5	0	0	0	1	4	0	2	0	1	6	3	0	0	4	1	0	8	0	1	0	4	9	30	0	0	1	2	12	42	0	0	0	7	0	1	0	0	0	2	13	2	1	2	2	5	0	2	0
K20829 cellulose 1,4-beta-cellobiosidase [EC:3.2.1.176]	8	11	0	0	9	3	7	2	1	5	20	0	11	0	1	20	30	4	0	1	6	12	24	95	0	0	1	4	10	7	0	0	0	2	43	97	0	0	0	1	0	1	0	2	0	3	0	0	0
K02668 two-component system, NtrC family, sensor histidine kinase PilS [EC:2.7.13.3]	15	3	6	7	6	6	5	3	9	6	12	0	2	7	10	1	0	4	3	3	12	8	14	19	4	0	2	4	13	11	0	9	1	2	3	26	10	4	2	3	3	2	2	6	4	3	6	6	1
K15226 arogenate dehydrogenase (NADP+) [EC:1.3.1.78]	3	0	0	0	0	0	0	1	0	0	0	3	3	1	0	0	0	0	0	0	0	0	0	2	0	0	2	0	1	6	0	0	0	0	4	0	0	0	1	0	3	2	0	1	1	1	0	0	2
K03888 menaquinol-cytochrome c reductase cytochrome b/c subunit	0	0	0	0	0	0	0	0	0	0	0	0	0	1	0	0	0	0	0	0	0	0	0	0	0	0	0	0	0	0	0	3	0	0	0	0	0	0	0	0	0	0	0	0	0	0	0	0	0
K00847 fructokinase [EC:2.7.1.4]	14	20	16	12	14	16	7	19	13	10	9	20	9	11	12	9	15	20	8	8	34	31	83	79	24	19	13	26	51	68	23	6	25	42	66	51	13	13	9	11	11	9	16	16	16	20	15	13	17
K16653 decaprenylphospho-beta-D-ribofuranose 2-oxidase [EC:1.1.98.3]	5	5	1	3	4	0	4	4	4	1	0	3	4	3	5	0	4	2	0	2	2	0	0	0	6	0	0	0	0	1	17	2	0	0	0	0	18	2	1	1	0	1	3	0	1	0	13	2	4
K13653 AraC family transcriptional regulator	0	0	0	2	4	0	0	4	2	3	1	3	0	0	0	0	0	6	3	1	1	3	14	11	7	1	5	3	0	9	4	0	3	3	13	34	0	3	1	2	0	1	3	2	1	0	0	0	0
K06974 archaemetzincin [EC:3.4.-.-]	3	2	6	1	10	2	4	9	0	5	14	26	0	2	2	0	7	13	6	32	39	32	46	32	6	33	34	28	27	12	6	17	21	18	27	12	2	8	3	2	4	0	5	1	2	1	1	2	1
K02011 iron(III) transport system permease protein	70	57	53	15	56	102	45	64	40	43	44	72	38	49	62	54	47	53	35	40	64	82	160	169	74	47	47	85	151	256	45	41	56	86	260	212	12	18	24	21	28	15	21	17	37	33	10	22	9
K21353 cycloisomaltooligosaccharide glucanotransferase [EC:2.4.1.248]	0	0	0	0	0	0	0	0	0	0	3	0	0	0	0	0	0	0	0	0	0	0	0	0	0	0	0	0	0	0	0	0	0	0	0	0	0	0	0	0	0	0	0	1	0	3	0	0	0
K03435 LacI family transcriptional regulator, fructose operon transcriptional repressor	0	0	0	0	0	1	0	0	2	0	0	0	0	0	0	0	0	0	0	0	0	0	0	7	0	0	0	0	2	0	0	0	0	2	0	25	0	0	0	0	0	1	0	1	1	0	0	0	0
K11209 GSH-dependent disulfide-bond oxidoreductase [EC:1.8.4.-]	24	9	0	0	0	1	31	11	0	1	0	2	35	21	7	0	0	3	7	2	3	0	0	0	7	0	0	5	6	6	3	2	0	1	0	0	3	3	7	1	3	2	0	0	1	0	5	2	1
K08998 uncharacterized protein	29	10	5	7	9	9	3	8	8	7	11	5	16	15	9	12	12	17	11	2	8	12	38	20	26	7	4	7	27	55	24	7	15	17	17	0	10	9	10	6	8	3	8	4	4	9	8	9	11
K06041 arabinose-5-phosphate isomerase [EC:5.3.1.13]	35	39	21	7	16	21	19	24	18	13	13	28	18	20	17	23	44	25	27	5	29	21	74	45	35	15	10	13	56	60	35	6	19	19	36	27	37	18	19	6	20	11	13	10	10	7	27	18	14
K07677 two-component system, NarL family, capsular synthesis sensor histidine kinase RcsC [EC:2.7.13.3]	2	0	0	0	0	0	1	0	0	0	0	0	1	0	0	0	0	3	0	0	0	0	2	0	1	0	0	0	0	0	0	0	0	0	0	0	0	0	1	0	0	0	0	0	0	0	0	0	0
K01001 UDP-N-acetylglucosamine--dolichyl-phosphate N-acetylglucosaminephosphotransferase [EC:2.7.8.15]	0	0	0	3	2	5	2	0	5	1	1	1	0	1	0	0	0	23	0	1	2	0	23	37	1	2	2	6	4	20	9	0	3	11	19	3	0	0	0	0	5	4	1	1	5	9	0	0	1
K05034 solute carrier family 6 (neurotransmitter transporter, GABA) member 1	0	0	0	0	0	0	0	0	0	0	0	0	0	0	0	0	0	0	0	0	0	0	0	0	0	0	0	0	0	0	0	0	0	0	0	0	0	0	0	0	0	0	0	0	0	0	0	0	0
K19726 serine/homoserine O-acetyltransferase [EC:2.3.1.30 2.3.1.31]	3	2	0	0	0	0	0	0	1	0	0	0	4	1	0	0	0	0	2	0	0	0	0	0	0	0	0	0	0	0	0	0	0	0	0	0	1	0	0	0	0	0	0	2	0	0	0	0	0
K19228 cationic peptide transport system permease protein	0	0	0	0	0	0	0	0	0	0	0	0	0	0	0	0	0	0	0	0	0	0	0	0	0	0	0	0	0	0	0	0	0	0	0	0	0	0	0	0	0	0	0	0	0	0	0	0	0
K03862 vanillate monooxygenase [EC:1.14.13.82]	3	1	0	0	0	0	0	0	0	0	0	0	8	0	0	0	0	0	0	0	0	0	0	0	1	0	0	0	0	0	0	0	0	0	0	0	0	0	0	0	0	0	0	0	0	0	0	0	0
K08977 bisanhydrobacterioruberin hydratase [EC:4.2.1.161]	0	0	0	0	1	2	0	0	0	0	0	0	0	0	0	0	0	0	0	0	0	0	4	0	0	0	0	0	0	0	0	0	0	1	0	2	0	0	1	0	0	0	0	0	0	0	0	0	0
K08688 creatinase [EC:3.5.3.3]	2	0	0	0	0	0	0	1	0	0	0	0	1	0	0	0	0	0	0	0	0	0	0	0	4	0	0	0	0	0	1	0	0	0	0	0	1	0	0	0	0	0	0	0	0	0	0	0	0
K08265 heterodisulfide reductase subunit E [EC:1.8.98.1]	0	0	0	1	0	0	1	0	0	7	0	0	1	0	0	0	0	0	0	0	0	0	0	0	0	0	0	0	0	0	1	0	0	0	0	0	0	0	0	1	38	2	12	3	1	0	0	0	6
K18362 phenylacetyl-CoA:acceptor oxidoreductase 27-kDa subunit	6	8	2	4	3	13	4	7	9	4	6	7	8	5	2	0	12	3	1	1	5	8	14	6	6	0	1	2	9	16	13	0	1	4	14	11	2	4	3	0	1	0	0	0	1	0	2	2	0
K08928 photosynthetic reaction center L subunit	0	0	0	0	0	0	1	0	0	0	0	0	0	0	0	0	0	0	0	0	1	0	0	0	1	0	0	0	2	0	1	0	0	1	0	0	6	0	0	0	0	1	1	0	0	0	0	1	0
K00036 glucose-6-phosphate 1-dehydrogenase [EC:1.1.1.49 1.1.1.363]	50	49	24	11	12	33	33	34	39	7	14	33	38	29	21	26	15	25	7	6	16	27	63	63	34	12	7	13	52	116	15	8	48	18	99	71	52	15	28	15	26	10	40	15	8	16	35	20	25
K21104 poly(ethylene terephthalate) hydrolase [EC:3.1.1.101]	1	0	0	0	0	1	0	1	0	0	0	3	7	1	0	0	0	5	0	3	2	3	3	4	1	1	2	1	0	0	0	0	1	3	1	0	0	0	0	0	0	0	2	2	1	1	1	0	0
K11929 outer membrane pore protein E	0	0	0	0	0	0	1	0	0	0	0	0	0	0	0	0	0	0	0	0	0	0	0	0	2	0	0	0	0	0	0	0	0	0	0	0	0	0	0	0	0	0	0	0	0	0	0	0	0
K02716 photosystem II oxygen-evolving enhancer protein 1	2	1	0	0	0	0	1	0	1	0	0	0	0	1	0	0	0	0	4	0	0	2	0	2	10	0	1	0	0	0	12	0	0	0	0	0	20	1	3	2	0	1	1	0	0	0	0	0	2
K22226 Fe-coproporphyrin III synthase	96	94	36	31	47	58	50	84	43	24	59	68	62	83	53	26	69	75	22	11	48	66	67	77	38	22	44	43	98	85	42	12	32	67	68	86	24	16	15	6	32	14	17	12	9	13	16	16	23
K05569 multicomponent Na+:H+ antiporter subunit E	10	9	4	0	6	10	6	3	6	2	15	12	4	3	12	8	41	16	8	12	14	16	41	45	16	6	6	11	14	113	18	6	9	29	23	49	4	8	4	10	17	17	18	9	11	18	2	0	13
K03750 molybdopterin molybdotransferase [EC:2.10.1.1]	52	52	21	13	33	45	43	41	26	20	34	54	52	46	18	20	13	39	32	25	19	41	124	144	43	19	21	34	100	155	44	17	29	32	93	121	26	11	16	14	25	12	30	20	23	25	17	18	23
K00018 glycerate dehydrogenase [EC:1.1.1.29]	20	19	13	4	9	12	13	8	7	7	16	12	14	17	3	6	0	19	10	3	11	17	24	43	8	8	12	6	27	31	16	3	13	8	27	19	23	5	6	1	4	1	6	4	5	4	14	5	10
K01420 CRP/FNR family transcriptional regulator, anaerobic regulatory protein	48	34	5	5	3	6	32	38	11	12	3	8	55	31	6	4	2	9	12	13	19	12	7	19	28	10	7	10	19	4	29	9	10	7	3	18	7	25	17	7	12	18	21	1	1	3	22	6	22
K06606 2-keto-myo-inositol isomerase [EC:5.3.99.11]	2	10	5	2	6	3	2	4	3	3	9	2	11	3	7	1	0	4	0	1	6	5	21	13	3	3	3	8	18	30	7	1	4	11	17	21	1	1	1	1	3	1	6	2	11	7	1	4	4
K14518 PII interaction protein X	0	0	0	0	0	0	0	0	0	0	0	0	0	0	0	0	0	0	0	0	0	0	0	0	0	0	0	0	0	0	0	0	0	0	0	0	1	1	1	0	0	0	2	1	4	0	0	0	1
K02784 phosphocarrier protein HPr	1	4	0	0	0	0	5	4	1	3	0	2	4	3	0	0	0	1	0	0	1	0	11	5	3	1	0	1	3	6	8	0	3	2	0	0	0	1	1	2	2	1	0	1	2	1	1	2	1
K05544 tRNA-dihydrouridine synthase 3 [EC:1.3.1.89]	0	0	0	0	0	0	0	0	0	0	0	1	0	0	0	0	0	0	0	0	0	0	0	0	0	0	0	0	0	0	0	0	0	0	0	0	0	0	0	0	0	0	0	0	0	0	1	0	0
K03585 membrane fusion protein, multidrug efflux system	60	53	24	5	14	26	37	23	21	32	13	24	37	38	27	21	51	35	23	20	37	34	74	71	60	29	17	23	84	116	46	14	19	30	28	41	49	34	40	13	23	18	13	27	13	12	17	20	18
K13483 xanthine dehydrogenase YagT iron-sulfur-binding subunit	31	17	15	17	30	7	35	15	13	16	30	9	14	21	15	11	25	23	4	4	25	24	45	37	16	9	20	22	84	143	10	5	22	14	79	84	2	4	5	3	4	3	1	0	6	6	2	6	4
K23874 4-amino-4-deoxychorismate mutase [EC:5.4.99.67]	1	0	0	0	0	0	0	0	0	0	0	0	0	0	0	0	0	0	0	0	0	0	0	0	0	0	0	0	0	0	0	0	0	0	0	0	0	0	0	0	0	0	0	0	0	0	0	0	0
K18939 TetR/AcrR family transcriptional regulator, lmrAB and yxaGH operons repressor	1	0	0	3	2	0	2	4	2	2	0	1	0	1	0	0	0	0	0	0	0	0	0	0	0	0	0	0	0	0	0	0	0	0	0	0	2	1	0	0	0	0	1	0	0	0	0	3	0
K23556 4beta-methylsterol monooxygenase [EC:1.14.13.246]	0	0	0	0	0	0	1	0	0	0	0	0	0	0	0	0	0	0	0	0	0	0	0	0	0	0	0	0	0	0	0	0	0	0	0	0	0	0	0	0	0	0	0	0	0	0	0	0	0
K19076 CRISPR-associated protein Cmr2	1	0	0	0	0	0	0	0	0	0	0	0	0	0	0	0	0	0	4	0	1	0	3	0	1	0	0	0	2	9	1	0	0	0	7	0	8	0	2	2	1	2	1	0	0	0	2	2	1
K09565 peptidyl-prolyl isomerase F (cyclophilin D) [EC:5.2.1.8]	0	0	3	0	0	0	0	0	1	0	0	0	0	1	3	0	0	0	0	0	0	0	0	0	0	0	0	0	0	0	0	0	0	0	0	0	0	0	0	1	0	0	0	0	0	0	0	0	0
K17803 methyltransferase OMS1, mitochondrial [EC:2.1.1.-]	1	0	0	1	0	4	0	0	2	0	0	0	0	1	0	0	0	0	0	2	0	2	0	0	0	0	0	0	0	0	0	0	0	0	0	0	0	0	0	0	0	0	0	0	0	0	0	1	0
K15538 glycoprotein endo-alpha-1,2-mannosidase [EC:3.2.1.130]	0	0	2	0	5	1	0	0	0	0	0	1	0	0	0	3	0	3	0	0	0	4	8	10	0	0	4	1	10	1	0	0	1	8	14	8	0	1	0	0	1	1	0	0	0	2	0	1	5
K11620 lia operon protein LiaH	0	0	0	0	0	0	0	0	0	0	0	0	0	0	0	0	0	0	0	0	0	0	0	0	0	0	0	0	0	0	0	0	0	0	0	0	0	0	0	0	0	0	0	1	0	0	0	0	0
K20480 HTH-type transcriptional regulator, quorum sensing regulator NprR	0	0	0	0	0	0	0	0	0	0	0	0	0	0	0	0	0	0	0	0	0	0	0	0	0	0	0	0	0	0	0	0	0	0	0	0	0	0	1	0	0	0	0	0	0	0	0	0	0
K08691 malyl-CoA/(S)-citramalyl-CoA lyase [EC:4.1.3.24 4.1.3.25]	7	5	0	0	0	1	5	3	1	0	1	4	5	4	2	0	18	0	5	1	0	3	0	1	0	0	0	2	7	0	6	0	4	2	0	0	15	2	1	1	0	0	2	0	0	0	6	3	3
K03116 sec-independent protein translocase protein TatA	75	67	19	24	31	46	64	59	24	28	38	43	60	40	26	35	25	49	19	15	44	46	138	88	34	20	25	30	86	110	34	13	32	28	122	134	30	32	35	22	39	28	37	26	33	27	29	32	28
K21780 L-proline---[L-prolyl-carrier protein] ligase [EC:6.2.1.53]	3	2	2	1	4	1	0	4	4	0	0	0	7	4	1	0	0	0	1	0	0	0	1	4	2	0	1	0	2	0	0	0	0	0	0	0	0	2	0	0	0	0	0	0	1	0	1	0	0
K02097 phycobilisome core component	0	0	0	0	0	0	5	1	0	0	0	0	0	2	3	0	0	0	0	0	0	2	0	0	3	0	2	0	0	0	2	0	0	0	0	0	31	7	4	17	9	11	23	11	8	0	11	8	11
K09162 chlorite dismutase [EC:1.13.11.49]	0	0	0	0	0	0	0	0	0	0	0	0	0	0	0	0	0	0	0	0	0	0	0	0	0	1	0	0	0	0	0	0	0	0	0	0	0	0	0	0	0	0	0	0	0	0	1	0	0
K18845 16S rRNA (guanine(1405)-N(7))-methyltransferase [EC:2.1.1.179]	0	0	0	0	0	1	0	0	0	0	0	5	0	0	0	0	0	0	0	0	8	0	0	0	1	0	0	0	0	0	0	0	0	0	0	0	0	0	0	0	0	1	0	2	0	1	0	0	0
K21264 glutathione S-transferase fosA2 [EC:2.5.1.18]	0	0	0	0	0	1	0	0	0	0	0	0	0	0	0	0	0	0	0	0	0	0	0	0	0	0	0	0	0	0	0	0	0	0	0	0	0	0	0	0	0	0	0	1	0	0	0	0	0
K03724 ATP-dependent helicase Lhr and Lhr-like helicase [EC:3.6.4.-]	18	11	8	8	52	61	14	10	6	14	27	82	16	19	7	1	71	73	17	11	20	35	113	70	8	11	31	21	81	157	9	8	29	46	97	64	5	8	3	9	26	15	28	21	27	18	5	6	14
K06193 protein PhnA	1	0	2	0	2	1	1	1	4	0	0	0	1	0	4	2	0	0	4	0	0	3	1	0	4	0	0	3	3	0	17	1	0	0	5	0	3	2	1	0	1	0	0	1	0	0	0	1	2
K04044 molecular chaperone HscA	2	1	1	0	0	0	1	1	0	0	0	0	0	0	1	0	0	3	0	1	2	0	0	0	2	5	0	0	6	0	0	5	4	1	0	0	29	9	5	3	1	3	2	0	0	2	16	5	6
K11607 manganese/iron transport system ATP-binding protein	2	3	0	0	1	5	3	4	0	2	0	1	2	0	2	0	0	0	0	0	0	1	3	4	0	2	0	1	2	1	2	0	0	0	0	0	0	2	0	0	0	2	0	0	0	0	0	2	0
K00883 2-dehydro-3-deoxygalactonokinase [EC:2.7.1.58]	0	0	0	0	0	0	0	0	0	0	0	1	0	0	0	0	0	0	1	0	0	0	0	1	1	2	0	0	0	4	1	0	0	0	4	0	0	1	0	0	0	0	0	0	0	1	0	0	0
K21346 methionine transaminase [EC:2.6.1.88]	0	0	0	0	0	0	0	0	0	0	0	0	0	0	0	0	0	0	0	0	0	0	4	2	0	0	0	0	0	2	0	0	0	0	0	0	0	0	0	0	0	0	0	0	0	0	0	0	1
K22253 glucan 1,4-alpha-maltotetraohydrolase [EC:3.2.1.60]	0	0	0	0	0	0	0	0	0	0	0	0	0	0	0	0	0	0	0	0	0	0	0	0	0	0	0	0	0	0	0	0	0	0	0	0	0	0	0	0	0	0	0	0	0	0	0	0	0
K19594 gold/copper resistance efflux pump	3	2	0	2	5	11	1	1	0	1	2	2	8	2	4	3	0	2	5	0	4	1	4	3	6	5	2	3	4	0	0	6	1	0	2	0	0	2	5	1	0	2	0	0	1	0	1	5	0
K14260 alanine-synthesizing transaminase [EC:2.6.1.66 2.6.1.2]	5	17	10	3	16	54	9	16	8	5	36	34	11	27	15	7	46	28	3	10	7	16	66	45	4	9	9	32	66	39	25	10	22	18	76	141	12	11	6	2	15	12	10	9	8	17	9	9	9
K02291 15-cis-phytoene synthase [EC:2.5.1.32]	8	4	2	2	2	0	1	9	1	0	0	6	7	0	1	2	0	0	7	5	22	25	29	5	21	7	9	1	79	49	5	3	15	7	29	8	11	4	10	5	6	1	3	3	6	0	3	2	5
K09679 [heparan sulfate]-glucosamine 3-sulfotransferase 6 [EC:2.8.2.-]	0	0	0	0	0	0	0	0	0	0	0	0	0	0	0	0	0	0	0	0	0	0	0	0	0	0	0	0	0	0	0	0	0	0	0	0	0	0	0	0	0	0	0	0	0	0	0	0	0
K01518 bis(5'-nucleosidyl)-tetraphosphatase [EC:3.6.1.17]	4	3	0	0	0	1	0	3	0	0	2	1	1	0	0	1	0	0	0	0	0	0	4	0	0	2	0	0	0	0	1	0	0	1	6	0	0	0	1	0	2	1	0	0	1	2	0	0	0
K07540 benzylsuccinate synthase [EC:4.1.99.11]	0	2	2	2	21	9	2	6	3	4	22	26	0	5	3	0	12	18	0	11	8	12	39	26	6	3	5	20	56	48	5	3	14	22	28	16	1	6	3	4	8	2	3	2	0	1	0	1	1
K16202 dipeptide transport system ATP-binding protein	16	31	9	7	24	39	20	24	13	11	26	18	19	14	18	39	48	23	5	7	13	27	40	54	21	5	18	14	61	80	20	4	6	17	59	59	7	8	12	3	6	4	6	5	12	5	5	7	10
K16302 metal transporter CNNM	0	2	0	0	3	0	1	0	0	0	0	0	1	0	1	0	0	0	1	0	0	4	0	7	2	0	7	1	5	3	0	0	0	0	0	0	1	2	1	0	2	0	0	0	1	0	0	1	0
K13613 polyketide synthase PksM	8	10	4	14	9	5	10	3	5	17	6	1	2	12	1	6	1	5	11	7	11	0	15	1	13	6	0	2	8	0	8	3	1	1	12	29	32	10	2	0	3	0	0	0	0	0	19	7	3
K10775 phenylalanine ammonia-lyase [EC:4.3.1.24]	0	0	0	0	0	0	1	0	0	0	0	0	0	0	0	0	0	0	0	0	0	0	0	0	0	0	0	0	4	7	3	0	1	0	0	0	0	1	0	0	0	0	0	0	0	0	0	0	0
K12972 glyoxylate/hydroxypyruvate reductase [EC:1.1.1.79 1.1.1.81]	7	2	0	0	0	0	1	5	1	0	0	1	3	4	5	7	0	0	0	0	2	5	2	6	2	0	1	2	2	3	0	2	0	0	1	15	0	0	0	0	1	0	0	0	0	0	0	1	2
K07182 CBS domain-containing protein	36	41	25	21	13	11	29	48	19	20	11	4	31	43	27	21	13	4	24	19	20	16	19	10	46	19	13	10	25	21	41	16	6	5	3	10	73	26	15	9	21	16	24	8	8	8	33	20	17
K20626 lactoyl-CoA dehydratase subunit alpha [EC:4.2.1.54]	0	3	0	0	1	0	1	0	0	0	2	0	0	6	2	0	0	1	0	2	0	2	2	0	2	2	1	1	0	8	2	0	2	0	0	0	3	1	0	0	1	1	0	2	0	1	1	0	0
K18210 fumarate reductase (CoM/CoB) subunit B [EC:1.3.4.1]	0	0	5	1	11	12	2	8	3	2	9	9	0	1	0	0	0	16	4	1	21	22	73	65	4	8	20	28	25	44	4	4	25	52	87	90	1	2	6	1	14	9	9	5	6	4	1	4	3
K19344 cytochrome c55X	2	0	0	0	4	0	1	1	0	0	0	0	4	2	0	0	0	0	0	0	0	0	0	0	2	0	0	0	0	0	0	0	0	0	0	0	2	0	0	0	0	0	0	0	0	0	1	0	1
K16368 diacylglycerol kinase (CTP) [EC:2.7.1.174]	0	0	0	0	0	0	0	0	0	0	0	0	0	0	1	6	0	1	0	0	0	0	10	4	0	0	0	0	1	14	0	0	0	1	0	0	0	0	0	0	0	0	0	0	0	0	0	0	0
K11149 dehydrogenase/reductase SDR family member 9 [EC:1.1.-.-]	0	0	0	0	0	0	0	0	0	0	1	1	0	1	0	0	0	0	0	0	0	0	2	0	0	0	0	0	0	0	0	0	2	0	0	0	0	0	1	0	0	0	0	0	0	0	0	0	1
K01565 N-sulfoglucosamine sulfohydrolase [EC:3.10.1.1]	41	48	23	22	28	39	18	21	36	20	37	49	36	43	44	13	10	50	19	15	42	44	123	97	7	7	27	27	94	156	25	3	35	62	94	94	4	8	14	5	25	17	21	12	13	35	3	9	9
K07455 recombination protein RecT	0	0	0	0	0	0	0	0	0	0	0	0	0	0	0	0	0	0	0	0	0	5	8	6	0	2	0	0	0	13	0	0	0	0	4	0	1	0	0	1	0	0	1	1	0	0	0	0	0
K13693 glucosyl-3-phosphoglycerate synthase [EC:2.4.1.266]	17	13	8	10	2	21	13	10	4	10	15	16	14	13	9	1	22	21	8	10	21	21	38	43	16	14	16	17	41	87	10	0	12	14	59	25	4	4	5	1	23	3	17	17	8	4	7	4	8
K11312 cupin 2 domain-containing protein	5	0	0	1	3	0	2	2	0	2	0	0	0	5	5	0	0	0	4	1	0	1	8	1	0	4	1	1	0	0	5	0	1	5	0	0	2	1	1	0	1	1	0	0	0	0	2	2	1
K02436 DeoR family transcriptional regulator, galactitol utilization operon repressor	0	0	1	0	1	1	1	3	0	0	0	0	0	0	0	0	0	0	0	2	2	5	5	4	3	0	0	0	5	9	0	0	4	0	0	5	0	0	2	0	0	2	0	0	1	0	0	0	0
K22270 3-hydroxybenzoate 6-monooxygenase [EC:1.14.13.24]	4	1	2	0	0	0	1	0	0	0	0	0	1	1	0	0	0	0	0	0	0	0	0	0	1	0	0	0	0	0	0	0	0	2	0	0	0	0	0	0	0	0	0	0	0	0	0	0	0
K17325 glycerol transport system ATP-binding protein	12	19	3	12	5	2	7	15	2	5	0	8	6	6	10	4	22	5	18	13	11	16	9	9	17	3	5	5	17	9	17	13	23	10	1	0	15	6	11	3	4	1	3	16	5	8	15	8	10
K02535 UDP-3-O-[3-hydroxymyristoyl] N-acetylglucosamine deacetylase [EC:3.5.1.108]	87	72	12	24	22	28	41	53	43	26	26	47	70	56	43	24	60	38	47	26	43	59	77	126	54	36	36	15	120	196	66	39	32	32	69	46	66	52	45	16	21	33	25	43	21	8	40	34	39
K09960 uncharacterized protein	0	0	0	0	0	0	0	0	0	0	0	0	0	0	0	0	0	0	3	0	0	0	0	0	1	0	0	0	0	0	0	0	0	0	0	0	0	0	0	0	0	0	0	0	0	0	0	0	0
K21801 indoleacetamide hydrolase [EC:3.5.1.-]	0	0	0	0	0	0	0	0	0	0	0	0	2	0	1	2	0	0	0	0	0	0	0	0	0	0	0	0	1	0	0	0	0	0	0	0	0	0	2	0	0	0	0	0	0	0	0	0	0
K20541 cellulose synthase operon protein B	2	0	0	0	0	0	0	0	3	0	0	0	1	0	0	0	0	0	0	0	0	0	0	0	0	0	0	0	1	0	2	0	1	0	0	0	0	0	0	1	1	1	0	0	0	0	0	0	0
K22220 dibenzothiophene sulfone monooxygenase [EC:1.14.14.22]	0	0	0	0	0	0	2	0	1	0	0	0	4	0	0	0	0	0	0	0	0	0	0	0	0	1	0	0	0	0	0	0	0	0	0	0	0	0	0	0	0	0	0	0	0	0	0	1	0
K09878 aquaporin-10	0	0	0	0	0	0	0	0	0	0	0	0	0	0	0	0	0	0	0	0	0	1	0	0	0	0	0	0	1	0	0	0	0	0	0	0	0	0	0	0	0	0	0	0	0	0	0	0	0
K03306 inorganic phosphate transporter, PiT family	55	63	26	13	24	15	19	49	27	16	16	23	35	45	29	3	9	28	48	26	47	67	53	66	82	13	30	21	102	115	113	10	16	29	71	80	46	17	25	11	32	16	13	5	11	15	10	15	18
K20420 2-hydroxy-5-methyl-1-naphthoate 7-hydroxylase [EC:1.14.15.31]	0	2	0	0	0	0	4	2	0	1	0	0	5	1	0	0	0	0	0	0	0	0	0	0	0	0	0	1	0	0	0	0	0	0	0	0	0	0	0	0	0	0	0	0	0	0	1	0	0
K18431 CMP-N,N'-diacetyllegionaminic acid synthase [EC:2.7.7.82]	6	13	4	1	2	2	4	10	4	2	0	0	5	6	5	2	12	6	3	3	7	7	20	13	2	4	3	4	6	20	5	0	5	14	13	17	7	3	2	0	1	6	1	2	4	2	1	3	0
K14127 F420-non-reducing hydrogenase iron-sulfur subunit [EC:1.12.99.- 1.8.98.5 1.8.98.6]	33	63	67	55	97	213	31	45	67	62	115	181	14	48	99	24	160	228	106	105	170	284	499	355	103	164	161	140	541	672	113	92	129	213	407	389	106	56	67	44	126	77	74	35	50	55	73	82	59
K02099 AraC family transcriptional regulator, arabinose operon regulatory protein	1	2	1	1	0	0	1	1	0	0	0	0	0	3	0	0	0	0	0	0	0	0	0	0	0	0	0	0	0	0	0	6	0	0	0	0	0	1	0	0	0	0	1	0	3	0	1	0	0
K00453 tryptophan 2,3-dioxygenase [EC:1.13.11.11]	5	6	1	0	0	0	9	3	0	0	1	1	17	0	0	0	0	0	0	0	0	2	0	1	6	2	0	0	0	0	0	0	0	0	0	0	2	1	2	1	0	0	0	0	2	0	2	2	1
K14487 auxin responsive GH3 gene family	0	0	0	0	0	0	0	0	0	0	0	0	0	0	0	0	0	0	0	0	0	0	0	0	0	0	0	0	0	0	0	0	0	0	0	0	0	0	0	0	0	0	0	0	0	0	0	0	0
K23057 putative lysine/arginine/ornithine/histidine/octopine transport system permease protein	0	0	0	0	0	0	0	0	0	0	0	0	0	0	0	0	0	0	0	0	0	0	0	0	0	0	0	0	0	0	0	0	0	0	0	0	0	0	0	0	0	0	0	0	0	0	0	0	0
K03502 DNA polymerase V	0	5	0	0	0	1	1	4	0	1	0	0	1	2	0	1	0	0	5	0	0	2	1	6	2	0	2	2	2	3	0	0	0	1	23	0	1	0	5	0	1	3	2	0	5	8	0	3	2
K01261 glutamyl aminopeptidase [EC:3.4.11.7]	14	5	4	7	9	22	8	6	11	3	17	18	12	8	6	3	22	16	1	3	9	15	58	38	10	0	13	9	30	60	3	1	4	18	81	26	2	4	5	3	17	8	7	3	8	15	2	5	7
K21591 teichoic acid glycerol-phosphate transferase [EC:2.7.8.45]	0	0	0	2	0	0	0	1	0	0	0	0	0	0	3	0	0	0	0	0	0	0	0	0	0	0	0	0	0	0	0	0	0	0	0	0	0	0	1	0	1	0	0	0	0	0	0	0	0
K14742 tRNA threonylcarbamoyladenosine biosynthesis protein TsaB	6	8	5	1	7	11	5	6	4	8	12	5	10	8	6	1	12	10	9	1	7	5	30	38	11	9	1	11	16	32	5	2	7	12	15	5	13	8	4	3	6	8	2	9	5	9	8	2	4
K08105 dermatan 4-sulfotransferase 1 [EC:2.8.2.35]	0	0	0	0	0	0	0	0	0	0	0	0	0	0	0	0	0	0	0	0	0	0	0	0	0	0	0	0	0	0	0	0	0	0	0	0	1	0	0	0	0	0	0	0	0	0	0	1	0
K10770 alkylated DNA repair protein alkB homolog 8 [EC:1.14.11.- 2.1.1.229]	0	1	0	0	0	0	0	0	0	0	0	0	0	0	0	0	0	0	0	0	0	0	0	0	0	0	0	0	0	0	0	0	0	0	0	0	0	0	0	0	0	0	0	0	0	0	0	0	0
K06890 uncharacterized protein	90	62	31	12	45	32	39	52	21	18	22	48	56	56	20	19	22	28	59	14	40	44	69	109	67	43	21	14	75	132	75	27	22	27	76	41	54	67	59	22	18	14	14	10	5	3	18	40	28
K10672 glycine reductase complex component B subunit gamma [EC:1.21.4.2]	0	9	3	0	2	0	0	1	1	0	1	1	2	1	2	0	0	13	1	1	1	1	11	1	0	0	5	3	1	10	2	0	3	1	4	0	0	1	1	0	0	1	0	0	0	1	0	1	0
K18978 glyceraldehyde-3-phosphate dehydrogenase [NAD(P)+] [EC:1.2.1.90]	1	0	0	1	0	2	0	1	1	0	0	0	2	0	0	0	0	0	0	0	0	0	1	4	1	0	0	2	2	1	1	0	1	2	0	0	0	0	1	0	0	0	0	0	2	1	0	0	2
K17105 geranylgeranylglycerol-phosphate geranylgeranyltransferase [EC:2.5.1.42]	1	3	4	4	9	6	3	4	9	1	8	31	0	5	0	3	15	11	0	3	2	16	19	20	1	3	5	8	7	35	0	7	2	8	20	30	0	1	5	0	3	5	2	3	2	1	0	0	2
K07905 Ras-related protein Rab-11B	0	0	0	0	2	2	0	0	0	1	1	2	0	0	0	0	0	0	1	1	0	0	12	9	0	1	0	0	5	3	0	0	0	9	5	9	0	0	2	0	1	1	2	0	0	0	0	0	0
K14743 membrane-anchored mycosin MYCP [EC:3.4.21.-]	0	4	0	0	0	0	0	0	0	0	0	0	0	0	0	0	0	0	0	2	0	0	1	0	0	0	0	0	0	0	0	0	0	1	0	0	0	1	0	0	0	0	0	0	0	0	1	0	0
K05301 sulfite dehydrogenase (cytochrome) subunit A [EC:1.8.2.1]	35	20	4	1	1	0	28	15	1	3	0	0	34	34	6	0	0	1	10	3	2	2	3	0	24	0	1	2	8	0	12	5	1	0	0	0	13	1	0	1	1	0	0	0	1	0	3	2	4
K21481 heme oxygenase (mycobilin-producing) [EC:1.14.99.57]	5	4	0	4	1	0	7	8	0	0	0	3	4	6	0	0	0	0	0	0	0	0	6	0	0	0	1	0	0	0	0	0	3	0	6	10	1	0	0	0	1	0	0	0	0	0	0	0	0
K11689 C4-dicarboxylate transporter, DctQ subunit	21	25	7	7	8	2	13	12	7	4	4	15	15	14	15	2	32	5	9	14	16	28	22	43	16	14	10	15	29	18	28	6	16	21	17	33	28	7	1	3	3	3	6	6	9	5	8	5	5
K18673 beta-glucoside kinase [EC:2.7.1.85]	1	0	0	0	0	0	0	0	0	0	0	0	0	0	0	0	0	0	0	0	0	0	0	0	0	0	0	0	0	0	0	0	0	1	0	0	0	0	0	0	0	0	0	0	0	0	0	0	0
K12823 ATP-dependent RNA helicase DDX5/DBP2 [EC:3.6.4.13]	0	0	0	0	0	0	0	0	0	0	0	0	0	0	0	0	0	0	0	0	0	0	0	0	0	0	0	0	0	0	0	0	0	0	0	0	0	0	0	0	0	0	0	0	0	0	0	0	0
K00290 saccharopine dehydrogenase (NAD+, L-lysine forming) [EC:1.5.1.7]	25	16	8	14	17	4	21	24	11	5	15	20	25	30	13	11	0	9	35	9	23	27	64	48	20	23	31	8	52	62	43	27	17	6	19	92	40	20	29	16	33	11	9	9	15	17	16	31	13
K19433 TasA anchoring/assembly protein	0	0	0	0	0	0	0	0	0	0	0	0	0	0	0	0	0	0	0	0	0	0	0	0	0	0	0	0	0	0	0	0	0	0	0	0	0	0	0	0	0	0	0	0	0	0	0	0	0
K01212 levanase [EC:3.2.1.65]	1	0	2	4	4	6	0	1	4	2	9	0	2	2	0	0	0	0	1	0	6	0	4	1	0	0	1	3	0	0	2	0	0	6	0	0	0	0	1	0	0	0	0	1	1	0	1	0	0
K12834 PHD finger-like domain-containing protein 5A	1	0	0	0	1	3	0	1	0	0	0	0	3	1	0	0	0	0	1	0	0	0	0	0	0	0	0	0	0	4	0	0	2	0	0	0	0	0	0	0	0	0	0	0	0	0	0	0	0
K02585 nitrogen fixation protein NifB	0	0	0	0	2	0	0	1	0	0	3	5	0	0	0	0	0	0	0	0	3	1	0	4	0	0	1	2	0	13	0	0	5	0	2	0	2	0	0	1	6	1	4	2	4	3	0	1	0
K07941 ADP-ribosylation factor 6	0	0	0	0	0	4	0	0	0	0	0	1	0	0	0	0	0	0	0	0	1	0	0	6	0	3	3	0	4	8	0	0	3	0	7	0	0	0	0	0	2	1	0	0	1	0	0	0	0
K05523 D-lactate dehydratase / protein deglycase [EC:4.2.1.130 3.5.1.124]	1	1	0	0	0	0	0	0	1	0	0	0	7	0	0	0	0	0	0	0	0	0	0	0	0	1	0	0	0	0	0	0	0	1	0	0	0	0	0	0	0	0	0	0	0	0	0	0	0
K01592 tyrosine decarboxylase [EC:4.1.1.25]	0	0	0	0	0	1	0	1	0	0	0	1	0	0	0	0	0	0	0	0	0	0	0	0	0	0	0	1	0	0	0	1	0	2	0	0	0	0	0	0	0	0	0	0	0	0	0	0	0
K01411 nardilysin [EC:3.4.24.61]	0	0	0	0	0	0	0	0	0	0	0	0	1	0	0	0	0	0	0	0	0	0	0	0	0	0	0	0	0	0	0	0	0	0	0	0	0	0	0	0	0	0	0	0	0	0	0	0	0
K23176 methylthioxylose transferase	0	0	0	0	0	0	0	0	0	0	0	0	0	0	1	0	0	0	0	0	0	0	0	0	0	0	0	0	0	0	0	0	0	0	0	0	0	0	0	0	0	0	0	0	0	0	0	0	0
K02871 large subunit ribosomal protein L13	273	165	69	47	79	107	171	143	78	90	81	137	227	167	77	55	187	120	121	80	118	145	285	252	241	109	100	86	354	409	266	69	89	136	263	315	164	180	180	57	97	83	103	98	74	75	117	87	125
K16372 niddamycin polyketide synthase 1	3	0	0	0	0	0	0	0	0	0	1	0	0	0	0	0	0	0	0	0	0	0	0	0	1	0	0	2	0	0	0	0	0	0	0	0	1	0	0	0	0	0	0	1	0	0	0	0	0
K00951 GTP pyrophosphokinase [EC:2.7.6.5]	75	62	22	30	16	59	55	60	24	17	33	40	35	40	22	28	42	36	22	19	35	59	139	95	47	31	26	31	142	218	39	14	42	86	146	117	46	33	41	11	31	20	28	27	23	20	28	36	29
K01772 protoporphyrin/coproporphyrin ferrochelatase [EC:4.98.1.1 4.99.1.9]	38	25	3	7	9	2	18	13	5	5	1	6	22	22	10	12	0	14	10	7	9	8	5	6	11	4	2	1	17	9	31	4	1	0	0	6	31	9	12	3	3	2	4	2	1	0	8	13	5
K22332 beta-lactamase class D OXA-548 [EC:3.5.2.6]	0	0	0	0	0	0	0	0	0	0	0	0	0	0	0	0	0	0	0	0	0	0	0	0	0	0	0	0	0	0	0	0	0	0	0	0	0	0	0	0	0	0	0	0	0	0	0	0	0
K02526 2-keto-3-deoxygluconate permease	0	1	0	0	0	0	0	0	0	0	0	0	0	0	0	0	0	0	0	0	0	0	0	0	0	0	0	1	0	0	0	0	0	0	0	0	0	0	0	0	0	0	0	0	0	0	0	0	1
K01885 glutamyl-tRNA synthetase [EC:6.1.1.17]	39	51	11	20	38	47	30	38	25	27	43	45	52	31	24	13	34	51	14	17	41	49	168	141	58	27	19	53	139	151	63	16	23	56	129	149	37	26	36	22	43	26	28	29	29	30	32	27	28
K21759 vanillate/4-hydroxybenzoate decarboxylase subunit D [EC:4.1.1.- 4.1.1.61]	0	5	0	0	0	0	2	0	0	1	0	0	1	0	0	0	0	0	0	0	0	0	0	0	0	0	0	0	0	0	0	0	0	0	0	0	0	0	0	0	0	0	0	0	0	0	0	0	0
K18560 NADH-dependent fumarate reductase subunit E	6	10	0	1	1	9	6	0	1	1	0	5	6	2	0	0	12	4	3	5	7	7	27	7	1	0	5	0	13	17	7	7	1	9	0	37	3	0	4	0	4	3	5	1	0	2	1	4	2
K20831 gellan tetrasaccharide unsaturated glucuronyl hydrolase [EC:3.2.1.179]	0	0	0	0	0	0	0	1	0	0	0	0	0	0	0	0	0	0	1	0	0	0	0	1	0	0	0	0	6	1	0	0	0	0	0	0	0	0	0	0	0	0	1	0	0	0	0	0	0
K21106 isoprene-epoxide---glutathione S-transferase [EC:4.4.1.34]	0	0	0	0	0	0	0	0	0	0	0	0	0	0	0	0	0	0	0	0	0	0	0	0	0	0	0	0	0	0	0	0	0	0	0	0	0	0	0	0	1	0	0	0	0	0	0	0	0
K02009 cobalt/nickel transport protein	3	5	0	3	2	25	2	5	4	5	15	6	2	6	2	0	10	20	5	0	11	5	62	90	12	12	12	6	36	181	20	10	18	18	20	110	5	2	2	1	14	6	9	15	8	3	5	3	2
K15743 carboxylesterase 3/5 [EC:3.1.1.1]	0	0	0	0	0	0	0	0	0	0	0	0	0	2	0	0	0	0	0	0	0	0	0	0	0	0	0	0	0	0	0	0	0	0	0	0	0	0	0	0	0	0	0	0	0	0	0	0	0
K12733 peptidyl-prolyl cis-trans isomerase-like 1 [EC:5.2.1.8]	1	3	0	0	1	1	2	3	3	0	1	0	4	3	0	5	0	0	1	0	0	0	11	3	3	0	2	2	3	12	1	0	1	0	0	6	3	2	2	0	0	2	3	0	0	1	1	0	1
K18562 2-oxoglutarate-dependent dioxygenase [EC:1.14.20.-]	3	6	1	0	0	0	1	1	0	0	0	0	3	0	0	0	0	0	0	0	1	1	0	0	0	0	0	0	0	0	0	0	0	0	0	0	0	1	1	0	0	0	0	0	0	0	1	1	0
K14084 trimethylamine corrinoid protein	93	104	76	39	119	127	52	76	61	76	68	107	63	97	107	40	44	109	76	61	83	117	1027	672	106	64	64	92	456	832	112	41	77	165	924	796	116	56	66	27	69	43	31	16	22	40	60	63	40
K00520 mercuric reductase [EC:1.16.1.1]	41	14	5	3	12	18	19	6	6	11	10	6	28	11	4	0	0	8	6	1	13	12	2	23	11	5	1	7	13	38	3	0	6	3	11	19	7	5	7	1	0	3	5	3	5	10	6	3	6
K23150 N5-(cytidine 5'-diphosphoramidyl)-L-glutamine hydrolase [EC:3.5.1.129]	0	0	0	0	0	0	0	1	0	0	0	0	0	0	0	0	0	0	0	0	0	0	1	0	0	0	0	0	0	0	0	0	0	0	0	0	0	0	0	0	0	0	0	0	0	0	0	0	0
K20777 exonuclease 3'-5' domain-containing protein 2 [EC:3.1.11.1]	1	0	0	0	0	0	0	0	0	0	0	0	0	1	0	0	0	0	0	0	0	0	0	4	0	0	2	0	0	0	0	0	0	0	0	0	0	1	0	0	0	0	1	0	0	0	0	1	0
K18129 TetR/AcrR family transcriptional regulator, mexXY operon repressor	0	0	0	0	0	0	0	0	0	0	0	0	0	0	0	0	4	0	0	0	0	1	0	0	0	0	0	0	0	0	0	0	0	0	0	0	0	0	0	0	0	0	0	0	0	0	0	0	0
K01028 3-oxoacid CoA-transferase subunit A [EC:2.8.3.5]	17	13	9	3	15	13	5	2	6	11	12	4	12	10	2	6	0	19	10	16	5	18	32	30	15	12	11	13	32	40	18	6	7	27	52	49	4	10	7	9	20	23	48	16	53	32	3	14	14
K24042 methionine synthase / methylenetetrahydrofolate reductase (NADH) [EC:2.1.1.13 1.5.1.54]	0	0	0	0	0	0	0	0	0	0	0	0	1	1	0	0	0	0	0	0	0	0	0	0	0	0	0	0	0	0	4	0	0	0	0	0	0	0	0	0	0	0	0	0	0	0	1	0	0
K15836 formate hydrogenlyase transcriptional activator	28	38	16	9	22	26	27	20	10	12	8	33	26	17	6	19	12	23	23	38	20	37	42	13	40	16	18	25	33	37	23	8	14	36	33	28	18	8	16	7	14	5	5	1	4	9	12	22	14
K20025 (R)-2-hydroxyisocaproyl-CoA dehydratase alpha subunit [EC:4.2.1.157]	2	4	1	0	2	6	0	3	2	3	1	4	0	3	1	0	0	10	3	3	0	11	17	5	8	0	5	2	8	13	1	11	2	11	8	0	0	1	1	2	4	4	1	1	2	2	1	3	5
K20021 L-cysteine desulfidase [EC:4.4.1.28]	0	1	1	2	1	0	0	0	0	0	0	0	0	0	0	0	0	0	0	0	1	4	1	0	2	0	2	4	13	0	2	0	2	5	6	0	7	0	1	2	4	1	1	1	0	1	1	0	1
K19795 ureidomalonase [EC:3.5.1.95]	3	2	0	1	0	0	1	1	0	1	0	0	3	0	0	0	0	0	1	1	0	1	2	0	5	1	0	1	0	2	2	0	0	0	0	0	0	0	0	0	0	0	0	0	0	0	0	1	0
K19687 antitoxin VapB	0	1	0	0	1	1	2	1	0	0	0	2	0	1	0	0	0	0	1	0	1	0	6	0	4	0	0	0	3	0	0	0	0	1	7	0	1	0	2	4	0	1	0	0	0	0	2	3	0
K24078 nickel and cobalt resistance protein CnrR	0	0	0	0	0	0	0	0	0	0	2	0	0	0	0	0	0	0	0	0	0	0	0	0	0	0	0	0	0	0	0	0	0	0	0	0	0	0	0	0	0	0	0	0	0	0	0	0	0
K00049 glyoxylate/hydroxypyruvate reductase [EC:1.1.1.79 1.1.1.81]	4	1	1	2	2	0	1	1	0	0	1	3	1	4	1	0	0	1	0	0	0	0	4	6	1	1	0	1	2	0	0	0	0	0	1	0	0	2	3	0	0	0	0	0	0	0	0	0	0
K09388 uncharacterized protein	0	0	0	0	1	0	0	0	0	0	0	0	0	0	0	0	0	0	0	0	0	1	0	1	0	0	0	0	0	0	2	0	0	0	0	2	0	0	0	0	0	0	1	0	0	0	0	0	0
K01673 carbonic anhydrase [EC:4.2.1.1]	187	137	55	33	41	26	91	136	34	22	30	33	135	106	58	15	20	25	19	9	25	12	22	4	28	19	16	8	33	21	34	4	1	6	28	1	49	19	11	9	8	7	11	11	2	6	26	20	14
K23156 mycolipenoyl-CoA---2-(long-chain-fatty acyl)-trehalose mycolipenoyltransferase / long-chain-acyl-CoA---trehalose acyltransferase [EC:2.3.1.278 2.3.1.279]	0	0	0	0	0	0	0	0	0	0	0	0	0	0	0	0	0	0	0	0	0	0	0	0	0	0	0	0	0	0	0	0	0	0	0	0	0	0	0	0	0	0	0	0	0	0	0	0	0
K13912 deleted in malignant brain tumors 1 protein	0	0	0	0	0	0	0	0	0	0	0	0	0	0	0	0	0	0	0	0	0	0	0	0	0	0	0	0	0	0	0	0	0	0	0	0	0	0	0	0	0	0	0	0	0	0	0	0	0
K02335 DNA polymerase I [EC:2.7.7.7]	78	73	21	31	47	53	39	58	48	19	52	84	56	51	39	18	51	89	39	28	66	63	188	195	57	30	52	39	157	334	41	20	43	94	208	140	43	27	35	27	40	32	40	30	27	37	22	33	27
K22090 noroxomaritidine/norcraugsodine reductase [EC:1.3.1.- 1.4.1.-]	0	0	0	0	0	0	0	0	0	0	0	0	0	0	0	0	0	0	0	0	0	0	0	0	0	0	0	0	0	0	0	0	0	0	0	0	0	0	0	0	0	0	0	0	0	0	0	0	0
K15786 aspartate-semialdehyde dehydrogenase [EC:1.2.1.-]	0	0	0	0	0	0	0	0	0	0	0	0	0	0	0	0	0	0	0	0	0	0	0	0	0	0	0	0	0	3	0	0	0	0	0	0	0	0	0	0	0	0	0	0	0	0	0	0	0
K24409 thioglycine synthase [EC:6.2.2.1]	0	0	0	0	0	0	0	0	0	0	0	0	0	0	0	0	0	0	0	0	0	0	0	0	0	0	0	0	0	0	0	0	0	0	0	0	0	0	0	0	0	0	0	0	0	0	0	0	1
K03643 LPS-assembly lipoprotein	0	3	0	0	0	0	1	0	0	0	0	0	2	3	0	0	0	0	0	0	0	0	0	0	2	0	0	0	0	0	0	0	0	1	0	0	2	0	1	0	0	0	1	0	0	0	1	0	1
K07997 matrix metalloproteinase-17 (membrane-inserted) [EC:3.4.24.-]	0	0	0	0	0	0	0	0	0	0	0	0	0	0	0	0	0	0	0	0	0	0	0	0	0	0	0	0	0	0	0	0	0	0	0	0	0	0	0	0	0	0	0	0	0	0	0	0	0
K09020 ureidoacrylate peracid hydrolase [EC:3.5.1.110]	39	17	10	21	25	18	25	18	7	6	17	5	32	19	7	16	12	13	8	8	17	17	33	41	13	12	1	13	31	53	3	4	0	14	17	53	4	5	5	1	3	3	3	4	6	11	3	6	5
K02822 ascorbate PTS system EIIB component [EC:2.7.1.194]	0	0	0	0	0	0	0	0	0	0	0	0	0	0	0	0	0	0	0	0	0	0	5	1	1	0	0	0	3	4	4	0	0	0	8	0	0	0	0	2	0	1	0	0	0	0	0	1	0
K02474 UDP-N-acetyl-D-glucosamine/UDP-N-acetyl-D-galactosamine dehydrogenase [EC:1.1.1.136 1.1.1.-]	31	20	6	6	2	17	12	16	10	2	14	14	21	15	5	0	18	16	15	3	10	18	46	38	33	13	23	10	46	53	28	6	5	18	40	47	31	9	13	6	19	11	7	7	3	6	15	10	18
K14126 F420-non-reducing hydrogenase large subunit [EC:1.12.99.- 1.8.98.5]	16	23	68	59	159	261	9	26	84	61	161	209	3	34	54	70	251	253	85	87	130	150	336	296	118	73	130	195	357	588	45	80	109	179	337	343	61	67	65	35	107	92	67	35	59	68	52	84	51
K13875 L-arabonate dehydrase [EC:4.2.1.25]	2	4	0	0	0	1	0	4	0	1	0	3	1	3	0	0	0	1	0	0	0	1	6	4	2	0	0	0	1	0	1	0	0	0	0	0	0	0	2	0	0	0	1	0	0	0	0	0	2
K09710 ribosome-associated protein	22	18	13	19	12	8	15	18	11	8	9	11	21	25	20	12	2	18	16	7	15	16	67	40	54	16	12	14	46	95	17	11	15	14	61	45	41	55	51	16	22	20	23	22	16	13	28	26	25
K02912 large subunit ribosomal protein L32e	7	7	4	0	14	23	6	2	5	12	14	28	4	3	3	0	29	28	3	3	5	32	37	59	12	1	10	12	53	72	1	2	9	43	89	39	1	2	3	3	12	12	7	7	8	5	1	3	1
K20766 arylacetonitrilase [EC:3.5.5.5]	0	0	0	0	0	0	0	0	0	0	0	0	0	0	0	0	0	0	0	0	3	0	0	0	0	0	0	0	0	0	0	0	0	0	0	0	0	0	0	0	0	0	0	0	0	0	0	0	0
K18298 membrane fusion protein, multidrug efflux system	0	3	0	0	0	4	3	1	0	0	1	8	0	1	2	0	0	2	0	3	0	0	0	1	1	1	0	0	6	0	3	1	0	1	12	0	3	0	2	1	0	1	0	0	0	0	1	1	1
K22397 2-dehydro-3-deoxy-D-pentonate aldolase [EC:4.1.2.28]	0	0	0	1	0	0	0	0	0	0	0	0	0	0	0	1	0	0	0	0	0	0	1	0	0	0	0	0	0	0	0	0	0	0	0	0	0	0	0	0	0	0	0	0	0	0	0	0	0
K19405 protein arginine kinase [EC:2.7.14.1]	20	26	20	18	27	31	16	20	27	16	31	51	16	32	19	12	4	32	8	11	14	33	85	72	26	7	28	9	42	134	10	3	10	29	89	48	2	12	15	4	23	9	16	10	16	23	4	10	10
K16514 4-oxalomesaconate tautomerase [EC:5.3.2.8]	2	1	0	0	0	0	2	1	1	0	2	0	4	0	0	0	0	5	4	4	0	0	0	0	0	0	0	0	0	5	3	2	1	0	4	0	0	1	1	0	0	0	0	0	0	0	0	0	1
K20938 long-chain alkane monooxygenase [EC:1.14.14.28]	1	1	0	0	0	0	0	1	0	0	0	0	0	1	0	0	0	0	0	0	0	0	0	0	0	0	0	0	0	0	0	0	0	0	0	0	0	0	0	0	0	0	0	0	0	0	0	0	0
K11922 GntR family transcriptional regulator, mannosyl-D-glycerate transport/metabolism system repressor	0	0	0	0	0	0	0	0	2	2	0	0	1	0	0	0	0	0	0	0	0	0	5	1	1	0	0	0	0	0	1	0	0	0	0	0	0	1	0	0	0	0	0	1	0	0	0	0	0
K04768 acetoin utilization protein AcuC	8	3	6	6	16	18	8	11	14	11	16	20	11	12	8	8	52	28	3	3	23	36	57	42	27	6	20	27	36	62	24	7	24	29	57	45	19	11	14	6	17	16	13	6	14	18	8	20	9
K17234 arabinooligosaccharide transport system substrate-binding protein	5	4	6	7	6	2	1	3	1	2	5	0	2	6	2	0	17	1	1	1	1	4	3	4	9	0	4	1	6	8	2	0	2	1	12	3	1	4	0	0	2	0	3	3	5	4	0	1	0
K03078 3-dehydro-L-gulonate-6-phosphate decarboxylase [EC:4.1.1.85]	0	0	0	0	0	0	0	0	1	0	0	0	0	0	0	0	0	0	1	0	0	0	0	0	1	0	0	0	0	0	0	0	0	0	0	0	0	0	0	0	0	0	0	0	0	0	0	0	1
K07911 Ras-related protein Rab-20	0	0	0	0	0	0	0	0	0	0	0	0	0	0	0	0	0	0	0	0	0	0	0	0	0	0	0	0	0	0	0	0	0	0	0	0	0	0	0	0	0	0	0	0	0	0	0	0	0
K07073 uncharacterized protein	0	2	0	2	2	15	0	0	3	0	11	22	0	0	0	2	12	17	0	0	0	0	51	20	0	0	1	3	12	33	1	0	1	4	27	8	3	0	1	0	0	3	3	3	4	6	1	0	0
K06965 protein pelota	1	0	0	0	0	8	0	0	0	1	0	5	1	1	0	1	0	1	0	2	0	5	26	8	0	0	3	0	9	23	0	3	3	7	18	0	0	0	2	0	8	4	7	1	0	1	0	2	1
K02979 small subunit ribosomal protein S28e	4	8	1	4	5	15	11	2	2	3	11	6	2	2	6	6	29	13	0	6	8	14	36	32	4	3	19	8	40	37	5	3	0	13	16	18	3	3	6	5	12	5	11	11	8	6	2	4	7
K06888 uncharacterized protein	113	56	14	12	38	78	34	31	26	22	58	60	101	54	14	0	39	44	17	9	30	78	80	61	61	20	23	25	69	205	22	20	20	59	129	80	18	17	14	9	20	7	11	6	16	12	15	15	20
K01259 proline iminopeptidase [EC:3.4.11.5]	28	20	2	10	14	29	15	17	12	9	15	13	14	11	14	13	19	14	8	10	17	13	37	55	18	4	12	14	29	75	10	6	21	18	57	43	29	11	13	3	11	5	2	1	11	4	6	10	9
K17952 cytochrome P450 family 29 subfamily A	0	0	0	0	0	0	0	0	0	0	0	0	1	0	0	0	0	0	0	0	0	0	0	0	0	0	0	0	0	0	0	0	0	0	0	0	0	0	0	0	0	0	0	0	0	0	0	0	0
K19126 CRISPR system Cascade subunit CasE	0	0	0	1	0	0	1	0	2	0	0	0	0	1	0	0	4	2	0	0	0	5	1	0	0	0	1	2	2	4	0	0	4	0	9	0	1	0	1	0	5	3	2	1	1	0	2	1	3
K06943 nucleolar GTP-binding protein	0	0	0	2	3	2	1	1	0	0	0	1	0	1	0	0	0	4	2	0	2	0	3	7	1	0	4	2	6	23	0	0	3	0	33	0	0	2	3	3	18	4	5	4	4	4	3	1	1
K24393 sulfopyruvate decarboxylase [EC:4.1.1.79]	0	0	0	0	0	0	0	0	0	0	0	0	0	0	0	0	0	0	0	0	0	0	0	0	0	0	0	0	0	0	0	0	0	0	0	0	0	0	0	0	0	0	0	0	0	0	0	0	0
K01434 penicillin G amidase [EC:3.5.1.11]	56	50	24	20	73	92	53	45	25	28	54	127	46	41	43	24	43	84	23	38	105	180	473	492	55	29	91	146	279	848	31	35	96	193	505	489	37	24	29	15	57	35	37	36	56	85	27	32	32
K18055 hypoxia-inducible factor 1-alpha inhibitor (HIF hydroxylase) [EC:1.14.11.30]	0	0	0	0	0	0	0	0	0	0	0	0	0	0	0	0	0	0	0	0	0	0	0	0	1	0	0	0	0	0	0	0	0	0	0	0	0	2	1	2	0	0	2	0	0	0	4	0	0
K02990 small subunit ribosomal protein S6	148	76	54	16	19	23	66	52	38	21	14	34	79	76	27	8	35	38	36	25	38	24	113	98	116	30	26	18	99	197	111	18	20	27	140	88	127	91	93	20	30	32	32	48	17	18	64	42	55
K25068 fucose transport system permease protein	0	0	0	0	0	0	0	0	0	0	0	0	0	0	0	0	0	0	0	0	0	0	0	0	0	0	0	0	0	3	0	0	0	0	0	0	0	0	0	0	0	0	0	0	0	0	0	0	0
K03120 transcription initiation factor TFIID TATA-box-binding protein	18	17	10	9	29	51	4	11	14	17	26	49	9	14	10	6	31	57	20	5	33	44	125	57	8	14	22	35	65	136	23	4	66	49	191	101	10	13	13	16	59	40	38	30	24	55	7	14	18
K12436 mycoketide-CoA synthase [EC:2.3.1.295]	6	2	2	0	3	1	3	2	3	2	5	0	2	3	2	5	0	2	1	4	1	2	5	15	3	3	0	2	7	15	3	0	3	1	0	7	14	1	2	1	0	1	0	1	0	0	10	5	6
K22083 methylamine---glutamate N-methyltransferase subunit C [EC:2.1.1.21]	50	39	18	9	10	49	36	28	17	3	33	32	36	30	18	5	36	24	11	16	17	28	25	51	40	19	29	15	51	51	21	7	21	23	56	70	9	6	4	7	9	6	6	5	6	12	9	7	4
K16886 quinone-modifying oxidoreductase, subunit QmoB	24	44	59	61	60	58	21	35	67	64	62	59	24	48	48	47	39	62	130	59	88	85	117	105	202	52	65	64	169	197	207	48	53	66	57	56	404	116	63	33	46	24	9	4	7	6	241	82	63
K11952 bicarbonate transport system ATP-binding protein [EC:7.3.2.-]	0	0	0	0	0	0	0	0	0	0	0	0	0	0	0	0	0	0	0	0	0	0	0	0	0	0	0	0	0	0	0	0	0	0	0	0	0	4	1	11	4	8	19	0	1	0	1	1	2
K09685 purine operon repressor	0	0	0	3	4	0	0	0	0	5	1	12	0	0	4	0	0	0	3	1	0	0	1	6	0	1	0	1	1	6	0	0	0	0	32	2	0	0	0	0	0	0	1	0	0	3	0	0	1
K01068 acyl-coenzyme A thioesterase 1/2/4 [EC:3.1.2.2]	0	0	0	0	0	0	0	0	0	0	0	0	0	0	0	0	0	0	0	0	0	0	0	0	0	0	0	0	1	0	0	0	0	0	0	0	0	0	0	0	0	0	0	0	0	0	0	0	0
K11250 leucine efflux protein	0	0	0	0	0	0	0	1	0	0	0	0	0	2	3	0	0	1	2	0	3	0	0	0	1	1	0	0	0	0	3	0	0	0	0	0	0	2	2	0	0	1	0	1	0	0	0	1	0
K11003 membrane fusion protein, hemolysin D	0	0	0	0	0	0	0	0	0	0	0	0	1	0	0	0	0	0	2	0	0	0	0	0	0	0	0	0	0	0	0	0	0	0	0	0	0	0	0	1	0	0	0	0	1	0	0	1	0
K02689 photosystem I P700 chlorophyll a apoprotein A1	36	35	2	2	0	0	23	22	3	2	0	0	15	35	4	0	5	0	21	16	30	20	0	0	61	7	10	6	25	0	92	6	0	0	0	0	456	81	49	52	29	17	26	7	3	1	84	75	35
K07583 tRNA pseudouridine synthase 10 [EC:5.4.99.25]	0	0	0	0	2	7	0	2	0	1	2	10	0	0	3	0	0	6	0	2	6	8	8	22	3	1	7	3	24	17	0	0	2	17	16	19	2	2	3	4	17	9	17	11	15	15	1	3	4
K01070 S-formylglutathione hydrolase [EC:3.1.2.12]	9	1	1	2	2	0	4	1	1	2	0	0	14	1	1	0	6	2	0	0	0	0	1	1	0	0	1	0	10	0	1	0	5	0	0	0	1	1	1	0	0	0	2	0	0	0	0	1	1
K04799 flap endonuclease-1 [EC:3.1.-.-]	1	2	8	2	13	21	0	2	0	0	11	17	0	4	3	1	24	25	0	3	9	20	53	48	1	2	8	15	35	63	3	4	4	29	79	76	0	1	4	5	8	4	5	3	9	9	1	2	4
K20764 2-nitroimidazole nitrohydrolase [EC:3.5.99.9]	0	0	0	0	0	1	0	0	0	0	0	0	0	0	0	0	0	0	0	0	0	0	0	2	0	0	0	0	0	0	0	0	0	0	0	0	0	0	0	0	0	0	0	0	0	0	0	0	0
K19761 gamma-glutamylaminecyclotransferase [EC:2.3.2.-]	0	1	0	0	0	0	0	0	0	0	0	0	1	0	0	0	0	0	0	0	0	0	0	0	0	0	0	0	0	0	0	0	0	0	0	0	0	0	0	0	0	0	0	0	0	0	2	0	0
K15431 phloroglucinol synthase [EC:2.3.1.253]	0	0	1	0	0	0	0	0	0	0	0	0	0	0	0	0	0	0	0	0	0	0	0	0	0	0	0	0	0	0	0	0	0	0	0	0	0	0	0	0	0	0	0	0	0	0	0	0	0
K10829 ferric hydroxamate transport system ATP-binding protein [EC:7.2.2.16]	9	3	0	1	0	0	5	8	0	2	2	0	4	2	0	0	0	1	0	2	0	2	0	0	2	0	1	0	2	0	9	0	0	0	0	8	8	3	3	0	1	3	1	3	3	1	2	5	2
K03774 FKBP-type peptidyl-prolyl cis-trans isomerase SlpA [EC:5.2.1.8]	23	12	4	0	16	15	11	8	3	5	14	10	21	10	1	0	0	12	8	1	12	12	38	12	8	7	8	11	14	16	12	2	1	6	13	16	0	1	3	1	10	5	7	1	1	1	5	2	2
K17312 trehalose transport system permease protein	0	0	0	0	0	0	1	0	0	0	0	0	0	0	0	0	0	0	0	0	0	0	1	1	0	0	0	0	0	2	0	1	0	3	0	0	0	0	1	0	0	0	0	0	0	0	0	0	1
K03304 tellurite resistance protein	0	0	0	0	0	0	0	0	0	0	0	0	0	0	0	0	0	0	0	0	3	7	5	9	7	0	0	0	7	2	8	3	2	0	0	0	2	6	2	0	3	4	9	4	0	1	4	2	13
K06180 23S rRNA pseudouridine1911/1915/1917 synthase [EC:5.4.99.23]	31	24	16	12	19	28	27	28	10	7	41	29	20	23	15	9	11	17	25	16	32	32	62	32	11	14	16	20	48	86	27	17	23	26	49	43	39	7	21	14	19	16	19	15	10	17	18	24	18
K02035 peptide/nickel transport system substrate-binding protein	3362	3095	1912	1487	3733	4843	1905	2583	2093	2069	3473	4453	2427	2570	2171	1527	3441	5130	1382	1547	3430	5189	14774	14030	2197	1687	3740	4771	10086	27358	1945	1336	2904	5555	16649	12292	1359	1010	1777	1164	3280	2597	3748	2506	3325	3999	821	1854	1376
K20266 type IV secretion system protein TrbJ	0	0	0	0	0	0	0	0	0	0	0	0	0	0	0	0	0	0	0	0	0	0	0	0	0	0	0	0	0	0	1	0	0	0	0	0	0	0	0	0	0	0	0	0	0	0	0	0	0
K14375 dTDP-L-oleandrosyltransferase [EC:2.4.1.-]	0	0	0	0	0	0	0	0	0	0	0	0	0	0	0	0	0	0	0	0	0	0	0	0	0	0	0	0	0	0	0	0	0	0	0	0	0	0	0	0	0	0	0	0	0	0	0	0	0
K00958 sulfate adenylyltransferase [EC:2.7.7.4]	203	249	274	212	365	308	132	224	340	257	311	292	150	263	225	139	413	411	344	251	291	279	501	330	498	234	204	224	726	602	491	172	205	238	539	363	557	297	264	133	268	129	53	30	43	29	366	331	165
K01899 succinyl-CoA synthetase alpha subunit [EC:6.2.1.4 6.2.1.5]	0	4	0	0	0	2	0	4	0	0	0	1	2	6	0	0	0	0	1	0	0	2	0	3	2	0	2	0	1	2	2	4	3	0	0	0	0	0	0	0	0	0	0	0	0	0	0	0	1
K08953 chlorosome envelope protein J	0	0	0	0	0	0	0	0	0	0	0	0	0	0	0	0	0	0	0	0	0	0	0	0	0	2	0	0	0	0	0	0	0	0	0	0	0	0	0	0	0	0	0	0	0	0	0	0	0
K07000 uncharacterized protein	2	0	0	0	0	5	1	2	2	1	0	0	2	1	2	0	0	4	3	0	0	1	1	3	3	2	0	5	16	9	1	0	0	4	8	32	2	0	2	0	2	0	2	0	0	2	0	1	0
K10202 N-acetylglucosamine transport system permease protein	3	5	4	0	3	9	4	6	1	1	0	3	6	8	3	0	0	0	2	6	0	3	7	2	1	1	0	0	4	4	3	5	0	1	8	8	0	0	1	0	0	1	1	1	2	5	0	3	1
K02665 type IV pilus assembly protein PilP	13	15	10	0	6	8	10	19	11	5	3	0	13	11	3	6	19	9	6	10	2	7	9	4	10	1	2	8	17	6	6	9	9	5	14	0	14	6	9	1	3	3	7	8	1	3	6	3	7
K21539 mycinamicin III 3''-O-methyltransferase [EC:2.1.1.237]	0	0	0	0	0	0	0	0	0	0	0	0	0	0	0	0	0	0	0	0	0	0	0	0	0	0	0	0	0	7	0	0	0	0	0	0	1	0	0	0	0	1	1	0	0	0	0	0	0
K08780 carboxypeptidase A3 [EC:3.4.17.1]	0	0	0	0	3	0	0	0	0	0	0	0	0	0	0	0	0	0	0	0	0	0	0	0	0	0	0	0	0	0	0	0	0	0	0	0	0	0	0	0	0	0	0	0	0	0	0	0	0
K06967 tRNA (adenine22-N1)-methyltransferase [EC:2.1.1.217]	0	0	0	0	0	0	0	0	0	0	0	0	0	0	0	0	0	0	0	0	0	0	0	0	0	0	0	0	0	0	0	0	0	0	0	0	1	0	0	1	0	0	0	0	0	0	0	0	0
K18138 multidrug efflux pump	23	28	8	3	12	6	15	28	16	14	18	10	22	12	23	6	11	8	26	7	21	26	23	14	53	23	16	15	45	32	43	9	16	12	19	10	14	17	30	13	15	13	9	12	18	6	21	13	19
K00476 aspartate beta-hydroxylase [EC:1.14.11.16]	2	0	1	0	0	0	2	2	0	2	1	0	2	0	0	0	0	0	0	0	1	0	0	0	1	1	0	0	1	0	1	0	0	0	0	0	0	0	1	0	0	0	0	0	0	0	0	1	0
K04765 nucleoside triphosphate diphosphatase [EC:3.6.1.9]	0	2	0	1	0	4	4	7	0	0	2	4	0	2	0	2	0	1	3	9	1	2	0	5	8	2	1	3	2	0	12	1	2	8	0	28	2	2	2	1	5	0	1	3	2	3	1	2	0
K09958 uncharacterized protein	5	0	0	1	0	0	1	0	0	0	0	0	3	5	1	1	0	0	0	0	0	0	0	0	0	0	0	0	0	0	0	0	0	0	0	0	1	1	0	1	0	0	1	0	0	0	0	0	0
K03735 ethanolamine ammonia-lyase large subunit [EC:4.3.1.7]	4	0	0	0	2	0	3	1	1	1	0	4	1	0	1	6	0	1	5	7	18	11	8	31	0	4	6	3	18	59	8	4	16	15	1	5	3	5	7	5	5	1	0	0	0	0	5	2	4
K04561 nitric oxide reductase subunit B [EC:1.7.2.5]	190	158	65	52	23	15	87	120	119	36	13	13	104	159	64	32	26	25	14	30	9	28	7	0	11	12	10	14	16	3	6	5	8	6	0	0	33	9	9	2	6	2	1	1	2	0	20	20	11
K00972 UDP-N-acetylglucosamine/UDP-N-acetylgalactosamine diphosphorylase [EC:2.7.7.23 2.7.7.83]	3	10	2	4	1	1	4	0	5	5	11	2	11	4	5	3	19	9	4	5	5	9	32	36	14	4	10	11	12	46	6	3	4	7	18	1	5	3	6	1	3	1	4	3	2	3	3	1	2
K14682 amino-acid N-acetyltransferase [EC:2.3.1.1]	7	0	0	1	2	1	3	1	0	1	0	0	4	5	0	0	0	0	3	2	6	3	3	1	3	1	1	3	0	9	6	3	0	2	0	1	2	7	2	1	0	0	1	0	1	0	3	2	1
K23462 flavin-dependent trigonelline monooxygenase, reductase component [EC:1.5.1.36]	0	0	0	0	0	0	0	0	0	0	0	0	0	1	0	0	0	0	0	0	0	0	0	0	0	0	0	0	0	0	0	0	0	0	0	0	0	0	0	0	0	0	0	0	0	0	0	0	0
K13796 tricarballylate dehydrogenase	20	10	8	6	5	3	12	9	2	5	7	3	13	8	2	1	1	5	6	2	3	3	12	22	8	2	2	6	24	10	2	0	3	2	16	0	3	1	0	1	0	0	0	0	1	3	1	3	1
K21576 glycine/sarcosine/betaine reductase complex component C subunit alpha [EC:1.21.4.2 1.21.4.3 1.21.4.4]	0	0	0	0	0	0	0	0	0	0	0	0	0	0	0	0	0	7	0	0	0	0	3	0	0	0	0	0	0	0	0	0	0	0	0	0	0	1	3	0	1	0	0	0	0	0	0	0	0
K16789 thiamine transporter	0	0	3	0	1	3	0	1	0	1	4	11	0	0	0	0	0	4	0	0	0	2	7	24	0	0	4	2	16	32	0	0	4	11	28	9	0	0	0	0	1	1	3	4	6	3	0	0	0
K05606 methylmalonyl-CoA/ethylmalonyl-CoA epimerase [EC:5.1.99.1]	30	36	13	17	36	38	28	35	24	9	43	13	24	33	11	2	53	41	17	17	40	68	119	83	16	22	37	53	75	144	39	7	22	59	119	144	13	9	14	7	16	11	13	13	13	14	13	24	2
K17879 peroxisomal coenzyme A diphosphatase NUDT7 [EC:3.6.1.-]	4	7	0	0	0	3	0	0	0	2	0	0	0	2	1	2	0	0	0	3	3	3	8	5	1	0	1	1	5	2	0	0	3	6	9	0	1	2	1	1	1	0	0	2	1	0	0	1	0
K10810 thiazole tautomerase (transcriptional regulator TenI) [EC:5.3.99.10]	0	0	0	0	0	0	0	0	0	0	0	0	0	0	0	0	0	0	0	0	0	0	0	0	0	0	0	0	0	0	0	0	0	0	0	0	0	0	0	0	0	0	0	0	0	0	0	0	0
K20148 acetylacetone-cleaving enzyme [EC:1.13.11.50]	1	0	0	0	0	0	0	0	0	0	0	0	3	0	0	0	0	0	0	0	0	0	0	0	0	0	0	0	0	0	0	2	0	0	0	0	0	1	0	0	0	0	0	0	0	0	0	0	0
K07398 conserved protein with predicted RNA binding PUA domain	0	0	0	0	0	0	0	0	0	0	0	0	0	0	0	0	0	0	0	0	0	1	3	1	0	0	1	0	0	14	0	0	2	0	9	0	0	0	1	0	0	2	3	0	0	0	0	1	0
K04949 cyclic nucleotide gated channel alpha 2	0	2	0	0	0	0	0	0	0	0	0	0	1	0	0	0	0	0	0	0	0	0	0	0	0	2	0	0	0	0	0	0	0	0	0	0	1	0	0	0	1	0	0	0	0	0	0	0	0
K22169 F420H2 dehydrogenase subunit N [EC:1.5.98.3]	2	6	0	5	8	45	4	2	6	6	8	19	3	3	0	2	18	11	9	1	5	12	13	13	0	1	17	8	35	44	3	2	14	11	19	12	2	2	3	2	9	5	12	3	1	2	2	2	1
K12073 1,4-dihydroxy-2-naphthoyl-CoA hydrolase [EC:3.1.2.28]	0	0	2	1	0	0	0	0	0	0	0	0	0	0	1	0	0	0	0	0	0	0	0	0	0	0	0	0	0	0	0	0	0	1	0	0	0	0	0	1	0	0	0	0	0	0	0	0	0
K03148 sulfur carrier protein ThiS adenylyltransferase [EC:2.7.7.73]	0	11	1	2	1	6	3	1	2	3	6	3	4	8	2	0	0	5	3	8	13	8	28	20	10	2	9	0	7	30	5	6	1	11	33	13	4	1	4	2	3	5	0	1	1	2	3	2	2
K07140 uncharacterized protein	6	9	0	0	1	0	5	1	4	0	0	0	7	2	0	0	0	1	1	3	0	0	0	0	3	0	2	0	0	0	2	0	2	0	0	0	0	2	5	0	1	0	0	0	0	0	0	1	5
K02067 phospholipid/cholesterol/gamma-HCH transport system substrate-binding protein	22	23	14	11	24	18	10	36	17	10	13	7	12	15	6	4	51	21	12	8	9	21	52	41	19	8	5	12	20	19	19	18	17	13	52	36	17	12	22	3	12	11	7	13	6	8	10	19	20
K21232 molybdopterin synthase sulfur carrier subunit	0	0	0	0	0	0	0	0	0	0	0	0	0	0	0	0	0	0	0	0	0	0	0	0	0	0	0	0	0	13	0	0	0	0	0	0	0	0	0	0	0	0	0	0	0	0	0	1	0
K06033 arylmalonate decarboxylase [EC:4.1.1.76]	1	0	2	1	1	0	0	5	1	2	2	0	3	1	0	0	0	1	0	0	1	0	10	8	2	0	0	1	5	3	3	1	0	1	1	14	0	0	0	0	2	0	0	1	0	1	0	0	0
K24454 thiazoline dehydrogenase / protease [EC:1.3.3.16 3.4.-.-]	0	0	0	0	0	0	0	0	0	0	0	0	0	0	0	0	0	0	1	0	0	0	0	0	0	0	0	0	0	0	0	0	0	0	0	0	0	0	0	0	0	0	0	0	0	0	0	0	0
K16033 FADH2-dependent halogenase	1	3	0	3	0	0	0	1	0	0	0	0	0	1	1	0	0	0	0	1	0	0	0	0	0	0	0	0	0	0	0	0	0	0	0	0	1	1	0	0	0	0	0	1	0	0	0	0	0
K13894 microcin C transport system permease protein	19	9	6	1	6	4	5	5	6	6	12	10	2	12	3	0	11	6	10	1	18	7	11	22	12	5	7	3	11	16	23	2	3	14	18	29	32	2	1	2	1	0	2	2	2	2	11	5	6
K07512 mitochondrial enoyl-[acyl-carrier protein] reductase / trans-2-enoyl-CoA reductase [EC:1.3.1.- 1.3.1.38]	0	1	0	0	0	0	0	1	0	0	0	0	0	2	0	0	0	0	0	0	0	3	0	0	1	4	0	0	1	0	0	0	0	0	0	0	1	1	0	0	0	0	0	0	0	0	0	0	0
K20935 hydrazine dehydrogenase [EC:1.7.2.8]	482	496	211	156	6	3	297	341	270	57	2	13	283	444	220	152	10	7	17	4	2	2	3	0	35	3	2	2	0	1	16	2	0	0	0	0	2	1	0	0	0	0	0	0	0	0	0	0	0
K12963 undecaprenyl phosphate-alpha-L-ara4N flippase subunit ArnF	0	2	0	0	0	0	0	1	2	0	0	1	2	0	0	0	0	1	0	0	0	1	0	5	1	2	0	0	0	0	0	0	0	1	1	0	1	0	0	0	2	0	0	1	0	0	0	0	0
K03564 thioredoxin-dependent peroxiredoxin [EC:1.11.1.24]	97	66	17	16	23	39	46	51	44	17	27	42	86	40	38	55	27	40	31	13	58	44	82	73	63	31	29	41	108	129	42	13	45	43	70	55	36	31	38	23	38	33	29	27	24	27	24	27	25
K16962 putative S-methylcysteine transport system permease protein	0	0	0	0	0	0	0	0	0	0	3	0	0	0	0	0	0	0	0	0	0	0	0	0	0	0	0	0	0	0	0	0	0	0	0	0	0	0	0	0	0	0	0	0	0	0	0	0	0
K10530 L-lactate oxidase [EC:1.1.3.2]	0	0	0	0	0	0	0	0	0	0	0	0	0	1	0	0	0	0	1	0	4	6	0	1	0	0	0	0	0	0	1	0	0	0	0	0	0	0	0	0	0	0	0	0	0	1	1	0	0
K09887 dCTP deaminase (dUMP-forming) [EC:3.5.4.30]	0	0	0	0	0	0	0	0	0	0	0	0	1	0	0	0	0	0	0	0	0	0	0	0	0	0	0	0	0	0	0	0	0	0	0	0	0	0	0	0	0	0	0	0	0	0	0	0	0
K11939 inner membrane transporter RhtA	0	0	0	0	0	0	2	0	0	0	0	0	0	0	0	0	0	0	0	0	0	0	0	0	0	0	0	0	0	0	0	0	0	0	0	0	0	1	1	0	0	0	0	0	0	0	0	0	0
K02641 ferredoxin--NADP+ reductase [EC:1.18.1.2]	7	7	2	0	4	0	17	6	0	0	0	1	12	2	1	0	0	1	4	1	0	3	3	0	8	3	0	0	4	3	8	1	0	0	0	0	15	2	2	3	3	2	2	1	3	0	7	7	3
K18218 tetracycline resistance efflux pump	4	2	6	0	7	13	1	5	3	3	2	6	5	5	1	0	19	8	3	2	7	11	52	75	7	3	6	3	19	199	11	2	2	13	40	69	9	7	9	4	2	4	11	15	26	26	5	6	2
K21288 rifampin ADP-ribosylating transferase	0	0	0	0	0	0	0	0	0	0	0	0	0	0	0	0	0	0	0	0	0	0	0	0	0	0	0	0	0	0	0	0	0	0	0	0	0	0	0	0	0	0	0	0	1	0	0	0	0
K02409 flagellar M-ring protein FliF	9	19	13	6	13	19	4	11	11	7	3	14	20	13	14	2	13	13	16	8	16	26	38	33	20	16	10	10	71	69	23	2	9	11	14	37	19	9	13	5	17	16	13	5	14	15	10	10	3
K04062 osmotically inducible lipoprotein OsmB	0	0	0	0	0	0	0	0	0	0	0	0	0	0	0	0	0	0	0	0	0	0	0	0	0	0	0	0	0	0	0	0	0	0	0	0	0	0	0	0	0	0	0	0	0	0	0	0	1
K11049 CylG protein	0	0	0	0	1	0	0	0	1	0	0	0	0	0	0	0	0	0	0	0	0	0	0	0	0	0	0	0	0	0	0	0	2	1	0	0	0	0	0	0	0	0	0	0	0	0	0	0	0
K16788 niacin transporter	0	2	0	0	2	2	0	0	0	0	0	0	0	0	0	0	0	0	0	0	0	0	10	9	0	0	1	0	0	15	0	0	0	0	18	0	1	0	0	0	0	0	0	4	5	0	0	0	1
K00830 alanine-glyoxylate transaminase / serine-glyoxylate transaminase / serine-pyruvate transaminase [EC:2.6.1.44 2.6.1.45 2.6.1.51]	71	46	35	29	53	57	44	55	42	31	63	89	60	63	42	33	51	74	29	22	60	64	171	232	43	25	43	51	156	352	39	24	37	65	186	173	30	25	41	17	40	28	46	52	42	34	29	33	44
K02234 cobalamin biosynthesis protein CobW	60	38	42	30	44	22	14	59	51	32	32	26	49	42	60	101	6	29	60	61	109	138	130	62	91	79	58	116	123	79	47	94	46	38	71	42	47	15	28	10	11	2	6	0	1	7	23	28	16
K19641 two-component system, NtrC family, response regulator HupR/HoxA	0	1	1	0	2	5	3	1	0	0	0	5	4	1	0	0	0	0	0	3	1	2	1	3	6	0	0	0	1	1	1	0	0	0	0	0	6	2	2	1	1	0	2	0	2	0	4	1	0
K12189 ESCRT-II complex subunit VPS25	0	0	0	0	0	0	0	0	0	0	0	0	0	0	0	0	0	0	0	2	0	0	0	0	0	0	0	0	0	0	0	0	0	0	0	0	0	0	0	0	2	0	1	0	1	0	0	0	0
K20026 (R)-2-hydroxyisocaproyl-CoA dehydratase beta subunit [EC:4.2.1.157]	3	2	0	0	0	0	1	2	0	1	0	0	0	0	0	0	0	0	0	0	0	0	0	0	0	0	0	0	2	0	1	0	2	0	0	0	0	0	0	0	0	0	0	0	0	0	0	0	0
K16146 maltokinase [EC:2.7.1.175]	0	0	0	0	0	0	0	0	0	0	0	0	0	0	0	0	0	0	0	0	0	0	0	0	0	0	0	0	0	0	0	0	0	0	0	0	0	0	0	0	0	0	0	0	0	0	0	0	0
K05714 2-hydroxy-6-oxonona-2,4-dienedioate hydrolase [EC:3.7.1.14]	6	2	1	0	1	0	5	3	0	1	0	0	3	3	0	0	0	0	2	2	0	0	2	1	2	0	0	0	0	0	2	0	1	0	9	0	0	0	0	0	0	1	0	1	0	0	2	1	1
K16873 5-(hydroxymethyl)furfural/furfural oxidase [EC:1.1.3.47 1.1.3.-]	3	4	0	0	0	0	4	3	0	0	0	0	1	6	0	0	0	0	0	0	0	0	0	0	0	0	0	0	0	0	0	0	0	0	0	0	0	0	0	0	0	0	0	0	0	0	2	0	0
K10671 glycine reductase complex component B subunit alpha and beta [EC:1.21.4.2]	6	4	4	1	0	3	0	1	3	0	4	0	4	5	2	4	0	12	4	0	0	3	3	4	1	0	0	1	2	0	0	0	0	0	0	0	1	0	1	0	0	0	0	2	0	0	0	3	2
K07904 Ras-related protein Rab-11A	1	0	0	0	2	13	1	1	0	3	6	19	1	0	0	0	6	3	3	4	3	7	11	30	8	2	5	2	27	42	1	1	9	23	26	21	3	1	2	2	9	5	5	6	6	9	1	2	12
K13603 3-vinyl bacteriochlorophyllide hydratase [EC:4.2.1.169]	0	0	0	0	0	0	1	0	0	0	0	0	0	0	0	0	0	0	0	0	1	0	0	0	1	0	0	0	0	0	0	0	0	0	0	0	0	0	0	2	2	7	2	0	0	0	1	1	0
K21307 sulfite dehydrogenase (quinone) subunit SoeA [EC:1.8.5.6]	43	50	8	1	10	15	45	30	10	8	3	6	30	69	9	8	0	10	7	2	5	6	19	33	28	7	4	12	23	16	22	7	2	6	11	13	19	17	5	2	2	7	5	3	0	1	8	6	14
K20583 deacetylase [EC:3.5.1.-]	0	0	0	0	0	0	0	0	0	0	0	5	0	0	0	0	0	0	0	0	0	0	0	0	0	0	0	0	0	0	0	0	0	0	0	0	0	0	0	0	0	0	0	0	0	0	0	0	0
K00322 NAD(P) transhydrogenase [EC:1.6.1.1]	7	9	0	3	0	6	6	9	0	0	1	4	12	12	0	0	0	1	6	0	4	3	2	6	4	0	4	1	11	5	13	0	2	0	17	14	0	2	1	1	1	0	0	0	2	0	3	11	2
K17206 putative xylitol transport system permease protein	14	11	12	5	25	11	8	17	8	7	8	8	6	12	16	0	34	10	13	13	7	16	37	26	14	15	9	21	29	59	7	7	1	5	55	45	7	5	6	4	9	3	7	18	23	9	1	3	4
K03314 Na+:H+ antiporter, NhaB family	9	2	0	0	0	0	3	1	0	1	0	6	7	2	0	0	0	0	0	0	1	0	0	0	9	0	0	0	0	0	0	0	0	0	0	0	1	0	0	0	0	0	0	0	0	0	0	0	0
K01783 ribulose-phosphate 3-epimerase [EC:5.1.3.1]	55	41	24	18	28	30	24	35	26	22	28	27	42	39	42	18	27	35	27	9	37	61	83	118	66	28	15	39	105	147	67	20	39	25	132	104	51	30	36	15	45	27	20	30	22	22	35	37	30
K02063 thiamine transport system permease protein	1	5	5	2	10	13	1	7	1	5	5	27	3	2	2	0	30	26	7	0	7	4	39	37	3	0	6	6	19	31	0	1	7	8	70	16	1	0	1	3	4	1	3	1	2	2	0	0	0
K00817 histidinol-phosphate aminotransferase [EC:2.6.1.9]	54	58	15	13	53	55	28	44	34	18	32	54	57	37	16	17	87	61	19	20	42	40	140	126	62	21	23	36	129	214	44	12	22	52	174	130	64	28	29	13	25	19	34	20	29	23	32	37	14
K02995 small subunit ribosomal protein S8e	2	2	0	0	10	20	2	5	1	6	8	13	1	2	5	0	1	14	4	0	9	5	17	26	7	1	6	2	26	32	10	7	11	4	58	5	2	7	6	5	11	3	12	4	5	20	7	3	5
K13086 mannosylfructose-6-phosphate phosphatase [EC:3.1.3.79]	0	0	0	1	2	0	1	2	0	0	0	0	0	0	0	0	0	0	0	0	0	0	2	0	1	0	0	0	1	0	0	0	0	1	0	0	0	0	1	0	0	0	1	0	0	0	0	1	0
K11892 type VI secretion system protein ImpK	6	7	3	9	7	9	9	3	7	3	6	10	9	8	6	5	0	7	2	8	4	3	10	1	5	2	1	5	7	12	7	3	4	3	5	1	8	2	3	3	1	0	1	0	0	3	6	5	6
K02284 phycocyanin alpha chain	7	6	0	0	0	0	4	4	1	0	0	0	8	5	0	0	0	0	6	1	14	10	0	4	17	0	0	1	2	0	28	3	0	0	0	0	73	13	14	10	10	8	16	1	7	0	22	13	4
K01500 methenyltetrahydrofolate cyclohydrolase [EC:3.5.4.9]	0	0	0	0	0	0	0	0	0	0	0	0	0	0	0	0	0	0	0	0	0	0	0	0	0	0	0	0	0	0	0	0	0	0	4	0	0	0	0	0	0	0	0	0	0	0	0	0	0
K15727 membrane fusion protein, heavy metal efflux system	11	15	19	2	2	8	19	7	10	1	3	6	13	16	14	2	0	4	4	0	5	10	18	24	0	1	3	11	10	8	0	5	8	3	15	38	6	6	8	2	8	3	3	1	1	2	6	4	9
K05525 linalool 8-monooxygenase [EC:1.14.14.84]	9	3	0	0	0	0	6	4	0	0	0	0	7	3	4	0	0	0	0	0	0	0	0	0	0	0	0	2	0	0	2	1	0	0	0	0	0	3	1	0	0	0	0	0	0	0	0	0	0
K11785 1,4-dihydroxy-6-naphthoate synthase [EC:1.14.-.-]	8	11	6	4	2	6	7	5	6	0	1	2	2	6	3	3	0	0	0	1	4	8	10	0	6	4	2	2	8	0	5	2	5	1	5	0	5	5	2	1	1	1	1	0	0	1	3	1	4
K02446 fructose-1,6-bisphosphatase II [EC:3.1.3.11]	12	11	2	4	7	17	13	3	4	5	5	3	8	8	5	6	0	9	5	0	1	8	10	8	3	4	3	6	9	14	6	0	4	3	17	5	17	4	6	6	4	6	5	2	5	9	5	1	4
K23557 3beta-hydroxysteroid-4beta-carboxylate 3-dehydrogenase (decarboxylating) [EC:1.1.1.417]	0	0	0	0	0	0	0	0	0	0	0	0	0	0	0	0	0	0	0	0	0	0	0	0	0	0	0	0	0	0	0	0	0	0	0	0	0	0	0	0	0	0	0	0	0	0	0	0	0
K02670 twitching motility protein PilU	62	40	10	9	5	7	32	35	6	5	15	3	44	19	12	1	13	9	5	5	7	13	29	15	14	10	17	13	23	19	5	8	15	11	42	10	97	20	6	0	5	1	0	1	1	1	35	5	5
K02636 cytochrome b6-f complex iron-sulfur subunit [EC:7.1.1.6]	65	47	24	28	11	8	38	32	24	14	9	3	36	42	47	22	15	10	12	2	7	8	7	11	20	2	7	4	16	0	20	6	3	3	0	8	32	17	19	23	28	21	42	17	29	2	18	19	19
K00919 4-diphosphocytidyl-2-C-methyl-D-erythritol kinase [EC:2.7.1.148]	21	18	19	22	24	19	23	20	14	11	19	24	18	21	12	17	21	30	20	7	17	18	87	53	18	14	12	18	59	91	37	6	6	20	94	102	28	11	27	4	21	10	15	10	15	29	15	11	12
K13548 2-deoxy-scyllo-inosamine dehydrogenase [EC:1.1.1.329]	0	0	0	0	0	2	0	0	2	0	1	0	1	0	0	0	0	0	0	0	0	0	1	1	1	0	1	1	0	0	0	0	0	0	0	0	0	0	0	0	0	0	0	0	0	0	0	0	0
K21758 benzoate transport porin	0	0	0	0	0	0	0	0	0	0	0	0	0	0	0	0	0	0	0	0	0	0	0	0	0	0	0	0	0	0	0	0	0	0	0	0	0	0	0	0	0	0	0	0	0	0	0	0	0
K09720 HTH-type transcriptional regulator, global nitrogen regulator NrpRI	2	2	0	0	1	4	1	0	2	6	0	5	0	3	3	1	0	2	1	0	2	4	27	32	0	0	5	4	12	54	4	1	2	2	17	0	0	2	0	0	9	2	1	3	3	3	1	1	0
K15371 glutamate dehydrogenase [EC:1.4.1.2]	57	36	6	2	14	6	35	15	7	9	3	1	27	17	6	6	0	15	15	2	11	4	14	21	23	7	2	4	47	24	21	5	8	4	9	14	16	11	4	2	2	3	1	2	3	6	4	9	5
K07743 transcriptional regulator	1	0	2	0	0	0	2	1	1	0	0	3	0	3	2	2	0	6	4	0	0	2	3	0	0	0	2	0	3	0	1	0	0	0	0	0	0	1	0	0	1	1	1	0	1	1	0	0	1
K07889 Ras-related protein Rab-5C	1	0	0	0	0	4	0	0	0	0	0	0	3	0	0	0	0	1	0	0	0	1	0	0	1	0	0	1	10	0	0	0	1	0	3	0	0	0	0	0	2	0	0	0	0	2	0	0	0
K01634 sphinganine-1-phosphate aldolase [EC:4.1.2.27]	15	13	5	9	5	4	1	11	9	10	1	4	13	5	5	4	7	5	6	4	4	16	24	12	8	6	17	7	8	33	7	4	11	19	43	29	2	4	7	3	6	6	13	1	2	3	6	10	8
K22071 ferredoxin-2, mitochondrial	0	0	0	0	0	0	0	0	0	0	0	0	0	0	0	0	0	0	0	0	0	0	0	0	1	0	0	0	0	0	0	0	0	0	0	0	0	0	0	0	0	0	0	0	0	0	0	0	1
K00832 aromatic-amino-acid transaminase [EC:2.6.1.57]	7	3	3	5	1	0	2	3	1	2	1	8	8	10	1	0	7	3	0	0	0	0	1	0	0	0	0	3	1	0	7	0	0	0	2	0	3	3	2	1	0	1	0	2	0	2	3	2	1
K01008 selenide, water dikinase [EC:2.7.9.3]	23	20	13	14	29	32	28	22	12	17	29	28	21	11	13	18	17	39	14	31	36	46	168	153	24	15	29	40	93	231	19	13	21	54	157	58	8	9	14	6	28	21	18	14	14	43	4	10	13
K03610 septum site-determining protein MinC	6	14	1	6	3	6	9	9	4	4	9	12	6	7	10	1	14	4	2	2	7	16	8	14	15	2	5	6	11	7	4	3	2	2	3	19	12	0	5	1	4	1	3	1	1	1	7	2	4
K24689 lipoyl synthase	0	0	0	0	0	0	0	0	0	0	0	0	0	0	0	0	0	1	2	0	0	1	0	5	0	3	0	0	0	0	0	0	0	0	0	0	0	0	0	0	0	0	0	0	1	0	0	0	2
K09946 uncharacterized protein	13	16	3	5	4	12	24	14	5	4	18	9	21	8	5	9	0	8	12	5	12	13	40	34	27	3	7	12	43	38	21	11	13	20	16	31	5	7	11	2	10	6	3	4	4	13	4	7	5
K22296 MarR family transcriptional regulator, lower aerobic nicotinate degradation pathway regulator	3	7	0	0	1	0	1	1	1	0	7	1	5	0	0	0	0	0	0	2	0	0	0	0	0	1	1	0	0	11	2	0	4	2	0	0	0	2	1	2	1	1	0	2	1	2	1	3	2
K13694 murein DD-endopeptidase / murein LD-carboxypeptidase [EC:3.4.-.- 3.4.17.13]	5	0	1	0	0	0	0	0	2	0	0	0	1	0	0	0	0	2	1	0	2	2	0	2	1	0	2	0	3	7	6	0	2	0	0	0	1	1	1	1	1	0	1	1	1	0	2	0	0
K16330 pseudouridylate synthase / pseudouridine kinase [EC:4.2.1.70 2.7.1.83]	0	0	0	0	0	0	0	0	0	0	0	0	0	0	0	0	0	0	0	0	0	0	0	0	0	0	0	0	0	0	0	0	0	0	0	0	0	0	0	0	0	0	0	0	0	0	0	0	0
K20024 monoglucosyldiacylglycerol epimerase [EC:5.1.3.34]	0	0	0	0	0	0	0	0	0	0	0	0	0	0	1	0	0	0	0	0	0	0	0	0	0	0	0	0	0	0	3	0	0	0	0	0	1	0	1	0	0	0	0	0	0	0	0	0	1
K18457 L-proline amide hydrolase [EC:3.5.1.101]	4	2	2	0	1	1	0	2	1	1	1	1	0	1	0	0	0	5	0	2	0	1	2	0	1	0	0	0	0	6	6	1	0	0	5	0	1	0	1	1	0	0	0	0	0	2	0	0	1
K20140 2-oxoglutarate carboxylase large subunit [EC:6.4.1.7]	0	0	0	0	0	2	0	0	0	0	0	0	0	0	0	0	4	0	0	0	0	0	0	0	0	0	0	0	0	0	0	0	0	0	0	0	0	0	0	0	0	0	0	0	0	0	0	0	0
K07138 uncharacterized protein	62	159	46	55	54	102	79	119	64	31	64	88	68	103	61	33	72	117	129	92	85	95	158	242	142	65	97	65	172	280	248	76	49	69	143	97	466	194	109	30	49	34	32	13	23	35	244	137	82
K18295 membrane fusion protein, multidrug efflux system	0	2	0	0	0	0	1	0	0	0	0	0	0	0	0	0	0	0	0	0	0	0	0	0	0	0	0	0	0	0	0	0	0	0	0	0	0	0	0	0	0	0	0	0	0	0	0	0	1
K07180 serine protein kinase	200	131	50	35	72	96	112	84	53	54	102	59	146	117	49	43	88	93	81	68	54	77	69	58	81	58	72	81	114	105	85	36	94	62	94	81	37	61	46	26	31	28	52	13	12	6	29	53	42
K16399 epothilone polyketide synthase F	1	0	2	1	1	2	3	0	0	1	3	2	2	6	1	1	0	2	0	2	4	1	0	0	2	3	1	0	1	7	2	0	1	0	0	0	1	0	4	1	1	0	0	0	0	0	1	1	1
K14735 hephaestin [EC:1.16.3.1]	33	56	7	1	1	0	17	37	3	2	0	0	21	23	8	2	0	0	0	0	0	0	3	0	2	0	0	1	0	0	4	0	0	0	0	0	0	1	0	0	0	0	0	0	0	0	0	0	0
K05566 multicomponent Na+:H+ antiporter subunit B	8	17	7	11	9	14	12	6	7	4	10	3	3	22	13	0	3	12	11	4	9	18	30	31	7	13	17	18	26	71	36	2	3	37	37	103	10	7	6	1	12	3	15	5	7	15	4	8	4
K01639 N-acetylneuraminate lyase [EC:4.1.3.3]	3	9	12	7	6	3	3	3	6	3	3	6	3	4	4	1	23	10	2	9	4	12	11	10	12	3	1	1	12	22	1	3	0	3	20	15	2	4	2	1	1	0	1	5	5	0	2	2	2
K15313 polyketide biosynthesis enoyl-CoA hydratase PksI	1	0	0	0	0	0	0	0	0	0	0	0	0	2	0	2	0	4	0	0	0	1	0	0	0	0	0	0	0	0	0	0	0	0	0	0	0	0	0	0	0	0	0	0	1	0	0	0	0
K02703 photosystem II P680 reaction center D1 protein [EC:1.10.3.9]	18	11	3	0	0	0	7	6	2	1	0	0	27	14	5	0	0	0	67	29	24	16	10	0	60	19	2	3	9	0	131	12	2	1	0	13	59	12	9	6	7	3	8	1	0	1	14	17	9
K19114 CRISPR-associated protein Csh1	0	0	0	3	0	2	0	0	2	0	3	2	0	0	0	0	0	0	1	1	0	3	6	4	0	1	0	2	1	4	1	0	4	8	0	20	0	0	0	0	1	1	1	0	0	1	1	0	0
K01733 threonine synthase [EC:4.2.3.1]	132	108	55	33	87	134	71	85	51	34	78	132	102	101	63	40	64	105	41	34	54	110	208	173	74	31	74	87	254	341	106	23	48	144	252	193	90	46	57	39	75	47	55	55	62	58	41	44	45
K08971 putative membrane protein	0	2	0	2	1	2	0	0	0	0	2	5	0	0	0	0	0	0	5	0	0	1	8	5	3	0	0	2	4	0	0	1	2	0	4	0	0	0	1	2	1	0	2	0	1	0	1	0	0
K11153 retinol dehydrogenase 12 [EC:1.1.1.300]	8	5	3	0	2	11	3	14	3	1	7	5	5	5	9	2	0	4	1	2	4	13	26	19	7	2	1	5	14	12	5	1	0	0	17	6	2	3	4	1	1	5	3	2	1	0	1	1	5
K04755 ferredoxin, 2Fe-2S	16	5	1	3	0	0	2	4	0	2	0	2	12	3	0	0	0	5	7	5	0	0	0	0	5	1	1	0	0	0	3	2	2	0	1	0	4	8	1	1	0	0	3	1	0	1	11	9	3
K05616 solute carrier family 1 (neutral amino acid transporter), member 5	0	0	0	0	0	0	0	0	0	0	0	0	0	0	0	0	0	0	0	0	0	3	0	0	0	2	0	0	0	0	0	0	0	0	0	0	0	0	0	0	0	0	0	0	0	2	0	0	0
K10943 two-component system, response regulator FlrC	18	29	17	28	13	31	9	20	10	17	15	13	9	23	19	14	0	14	23	19	29	40	72	45	29	24	20	31	54	83	29	25	15	22	70	32	10	5	12	8	11	3	6	5	4	13	2	5	8
K21471 peptidoglycan DL-endopeptidase CwlO [EC:3.4.-.-]	2	6	2	2	7	4	3	2	4	2	3	3	1	8	0	0	15	9	2	2	5	3	18	36	2	5	2	10	15	25	3	1	3	3	57	12	5	6	11	6	14	3	8	8	7	2	6	17	3
K12701 novobiocin biosynthesis protein NovH	0	0	0	0	0	0	0	0	1	0	0	0	0	0	0	1	0	0	0	0	0	0	0	0	0	0	0	0	0	0	0	0	0	0	0	0	0	0	0	0	0	0	0	0	0	0	0	0	0
K01686 mannonate dehydratase [EC:4.2.1.8]	41	34	13	17	29	34	26	24	20	24	22	44	17	30	25	13	44	13	15	12	31	57	99	81	16	21	24	15	62	161	16	19	25	46	69	71	26	14	13	13	17	23	12	14	14	12	20	16	23
K00663 aminoglycoside 6'-N-acetyltransferase [EC:2.3.1.82]	4	0	0	0	2	4	0	2	1	0	0	0	2	0	3	0	0	2	0	0	7	0	0	1	0	2	0	2	1	0	0	1	0	3	0	0	0	0	0	0	0	1	0	0	0	0	0	2	1
K16110 nonribosomal peptide synthetase protein BlmVIII	6	7	11	1	3	12	5	1	0	1	3	9	7	3	3	0	19	6	3	0	1	1	5	4	2	0	5	5	13	183	5	0	3	1	21	5	4	1	2	0	2	2	0	0	0	0	0	1	0
K06211 HTH-type transcriptional regulator, transcriptional repressor of NAD biosynthesis genes [EC:2.7.7.1 2.7.1.22]	0	0	0	1	0	0	0	3	0	0	0	0	0	5	0	0	0	0	0	0	0	0	1	0	1	0	0	0	0	0	0	0	0	0	0	0	1	0	0	0	1	0	0	0	0	0	0	0	1
K05888 L-gulono-1,4-lactone dehydrogenase [EC:1.1.2.-]	3	0	0	0	0	0	0	0	0	0	0	0	0	0	0	0	0	0	0	0	0	0	0	0	0	0	0	0	0	0	0	0	0	0	0	0	0	0	0	0	0	0	0	0	0	0	0	0	0
K07753 peroxisomal trans-2-enoyl-CoA reductase [EC:1.3.1.38]	1	0	0	0	2	0	0	0	0	1	0	0	0	0	0	0	0	0	0	0	0	0	0	0	2	0	0	0	0	0	0	0	0	0	1	0	0	1	1	0	0	0	0	0	0	0	0	0	0
K14062 outer membrane protein N	0	0	4	0	0	0	0	0	1	0	0	0	0	0	0	0	0	0	0	0	0	0	0	0	2	0	0	0	0	0	2	0	0	0	0	0	0	0	0	0	0	0	0	0	0	0	0	0	0
K08306 membrane-bound lytic murein transglycosylase C [EC:4.2.2.-]	0	2	0	2	0	1	2	0	0	0	1	1	1	0	1	0	0	0	3	0	6	2	4	5	2	0	2	2	11	0	1	1	3	5	5	0	0	0	0	3	3	1	1	0	0	1	2	5	0
K00380 sulfite reductase (NADPH) flavoprotein alpha-component [EC:1.8.1.2]	12	1	0	0	0	4	3	1	2	1	0	2	8	4	2	0	0	1	0	0	3	0	0	0	2	1	0	0	0	2	1	0	0	0	0	0	2	0	0	0	2	0	0	0	0	0	3	0	1
K21402 2-O-methyltransferase [EC:2.1.1.-]	0	4	0	0	0	0	0	0	0	0	0	0	0	0	0	0	0	0	0	0	0	0	0	0	0	0	0	0	0	0	0	0	0	0	0	0	0	0	0	0	0	0	0	0	0	0	0	0	0
K15741 methylthioalkylmalate synthase 1 [EC:2.3.3.17]	0	0	0	0	0	0	0	0	0	0	0	0	0	0	0	0	0	0	0	0	0	0	0	0	0	0	0	0	0	0	0	0	0	0	0	0	0	0	0	0	0	0	0	0	0	0	0	0	0
K02883 large subunit ribosomal protein L18e	1	4	5	4	8	32	7	3	2	6	12	11	9	1	3	0	0	26	1	2	7	15	61	31	4	0	6	20	31	27	4	9	17	28	38	15	1	5	5	4	12	13	9	11	8	7	2	1	6
K18005 [NiFe] hydrogenase diaphorase moiety large subunit [EC:1.12.1.2]	3	13	5	3	1	14	1	10	9	0	2	18	2	25	9	10	0	22	7	8	54	55	44	30	18	4	39	60	51	50	30	28	22	36	37	10	23	17	12	6	10	15	10	4	6	3	29	12	11
K15762 toluene monooxygenase system ferredoxin subunit	1	0	0	0	0	2	1	0	0	0	0	0	0	0	0	0	0	0	0	0	0	0	2	0	0	0	0	0	0	4	2	0	0	0	0	0	2	0	0	0	2	0	0	0	0	0	0	0	0
K14117 energy-converting hydrogenase B subunit H	0	0	0	0	0	0	0	0	0	0	0	0	0	0	0	0	0	0	0	0	0	0	0	0	0	0	0	0	0	3	0	0	0	0	0	0	0	0	0	0	0	0	0	0	0	0	0	0	0
K02547 methicillin resistance protein	0	0	0	0	3	0	0	0	0	0	0	0	0	0	0	0	0	0	0	0	0	0	0	0	0	0	0	0	0	0	0	0	0	0	0	0	0	0	0	0	0	0	0	0	0	0	0	0	0
K00325 H+-translocating NAD(P) transhydrogenase subunit beta [EC:1.6.1.2 7.1.1.1]	36	42	14	8	18	12	28	25	16	14	7	18	59	42	32	15	0	12	25	14	20	14	31	28	39	16	8	10	36	19	23	19	6	21	13	47	34	26	14	7	7	5	9	8	7	5	20	8	13
K24160 sodium/hydrogen antiporter	2	5	2	2	2	0	0	0	4	0	1	0	1	4	5	6	0	0	0	0	0	1	1	0	5	3	0	0	1	7	1	2	4	2	0	0	0	2	1	0	0	0	0	0	0	0	0	3	2
K10896 fanconi anemia group M protein	3	3	2	0	3	26	0	5	1	1	15	9	0	0	0	0	30	10	1	4	11	17	31	50	3	2	6	19	34	71	4	2	8	30	85	39	0	0	1	4	11	12	6	4	6	19	0	4	2
K05838 putative thioredoxin	24	9	4	3	0	0	5	2	5	7	1	2	22	13	1	0	0	7	1	1	4	7	16	1	16	3	6	1	11	0	4	3	2	0	0	5	11	10	15	7	2	3	8	2	1	2	4	6	15
K17326 xylobiose transport system substrate-binding protein	7	0	1	0	3	0	0	0	0	0	0	0	4	0	0	0	0	0	1	0	1	0	9	6	0	1	0	0	2	12	0	0	0	1	11	22	8	0	0	0	0	0	0	0	1	0	1	2	1
K07331 archaeal flagellar protein FlaH	0	3	0	0	1	5	0	0	1	0	0	2	0	0	1	0	0	0	1	0	6	4	4	0	0	0	4	2	1	19	0	0	0	0	0	0	0	0	0	0	3	1	1	1	4	1	0	0	0
K08683 3-hydroxyacyl-CoA dehydrogenase / 3-hydroxy-2-methylbutyryl-CoA dehydrogenase [EC:1.1.1.35 1.1.1.178]	7	19	2	3	1	0	1	7	1	2	0	0	9	14	11	3	0	1	3	5	2	5	0	4	2	0	0	0	4	5	3	0	1	5	1	0	0	1	2	0	0	0	0	0	0	0	0	0	1
K07711 two-component system, NtrC family, sensor histidine kinase GlrK [EC:2.7.13.3]	10	3	3	2	0	0	6	8	0	1	0	0	3	3	0	0	9	2	0	5	2	1	1	0	6	6	0	0	1	0	3	0	5	3	0	0	0	1	2	0	0	0	0	2	0	0	0	0	0
K25155 viologen exporter family transport system permease protein	0	0	0	0	0	0	0	0	0	0	0	0	0	0	0	0	0	0	0	0	0	0	0	0	0	0	0	1	0	0	0	0	0	0	0	0	0	0	0	0	0	0	0	0	0	0	0	0	0
K07451 5-methylcytosine-specific restriction enzyme A [EC:3.1.21.-]	4	6	1	0	10	6	8	5	1	2	1	5	7	8	2	0	12	5	5	6	9	2	11	5	15	7	1	0	17	29	8	4	7	7	19	15	5	3	5	3	1	2	5	3	2	5	5	2	1
K16413 stigmatellin polyketide synthase StiJ	3	10	9	3	6	8	8	6	2	2	1	1	2	2	7	0	1	8	0	3	1	4	7	1	0	0	3	2	4	24	3	1	0	1	11	1	6	0	0	0	0	0	4	1	0	0	5	1	1
K03674 glutaredoxin 1	0	0	0	0	0	0	0	0	0	0	0	0	0	0	0	0	0	0	0	0	0	0	0	0	1	0	0	0	0	0	0	0	0	0	0	0	0	0	0	0	0	0	0	0	0	0	0	0	0
K12992 O-antigen biosynthesis alpha-1,3-rhamnosyltransferase [EC:2.4.1.377]	4	2	2	0	3	4	3	5	4	13	4	4	0	1	4	0	0	5	0	3	6	1	6	4	2	3	0	1	12	14	2	1	6	6	15	1	2	0	2	0	5	2	1	1	0	2	2	1	0
K08968 L-methionine (R)-S-oxide reductase [EC:1.8.4.14]	9	3	0	2	0	0	5	1	3	0	0	1	8	4	2	6	4	1	1	4	4	2	7	11	0	1	1	3	5	8	0	0	0	2	7	4	1	4	3	3	7	4	0	0	2	0	2	3	3
K01698 porphobilinogen synthase [EC:4.2.1.24]	62	41	27	17	32	56	50	53	25	16	38	40	46	44	19	18	83	41	14	15	34	34	70	40	48	13	22	23	66	94	55	11	19	27	21	89	56	25	23	11	17	24	74	26	11	10	36	31	23
K21968 Mat/Ecp fimbriae periplasmic chaperone	0	0	0	0	0	0	0	0	0	0	0	0	0	0	0	0	0	0	0	0	0	0	0	0	0	0	0	0	0	0	0	0	0	0	0	0	1	0	0	0	0	0	0	0	0	0	0	0	0
K14067 malate-CoA ligase subunit beta [EC:6.2.1.9]	2	0	0	3	0	0	1	0	0	0	3	3	4	0	1	0	0	9	0	1	0	0	1	0	3	4	0	0	4	4	8	1	2	0	9	0	2	1	1	0	3	0	0	0	1	0	2	0	0
K13491 two-component system, chemotaxis family, response regulator WspF [EC:3.1.1.61]	0	0	0	0	0	0	0	0	3	0	0	0	2	1	0	5	0	1	0	1	0	0	2	0	0	0	0	1	0	0	1	4	0	0	0	0	3	0	0	1	1	0	0	0	0	0	0	0	1
K19299 aminoglycoside 3'-phosphotransferase III [EC:2.7.1.95]	0	0	0	0	0	0	0	0	0	0	0	0	0	0	0	0	0	0	0	0	0	0	0	0	0	0	0	0	0	0	0	0	0	0	0	0	0	0	0	0	0	0	0	0	0	0	0	0	0
K16878 2-furoyl-CoA dehydrogenase FAD binding subunit [EC:1.3.99.8]	1	0	2	2	3	1	0	3	1	1	0	0	0	0	1	0	8	2	2	0	0	2	12	8	0	0	1	3	1	11	0	0	1	5	12	0	0	0	1	0	2	0	1	1	0	0	2	2	0
K01198 xylan 1,4-beta-xylosidase [EC:3.2.1.37]	10	6	5	4	3	3	3	4	1	5	4	4	7	8	3	0	0	6	4	2	8	12	28	53	2	5	4	6	14	13	3	1	7	21	19	34	3	5	6	3	7	4	5	5	7	1	1	6	4
K09157 uncharacterized protein	10	15	8	2	9	7	12	6	13	6	9	16	7	15	2	3	0	9	10	22	17	17	35	23	18	15	3	17	24	51	13	12	6	18	27	24	11	9	7	4	6	5	4	6	1	8	5	10	4
K07106 N-acetylmuramic acid 6-phosphate etherase [EC:4.2.1.126]	5	4	3	2	4	4	5	10	3	5	3	13	3	5	4	1	11	3	1	5	10	14	25	24	4	6	3	6	16	43	1	0	11	14	21	19	6	6	3	0	5	5	8	2	5	6	3	5	5
K18567 MFS transporter, DHA1 family, purine base/nucleoside efflux pump	0	0	0	0	0	0	0	0	0	0	0	0	0	0	0	0	0	0	0	0	0	0	0	0	0	0	0	0	0	0	1	0	0	0	0	0	0	0	0	0	0	0	0	0	0	0	0	0	0
K01625 2-dehydro-3-deoxyphosphogluconate aldolase / (4S)-4-hydroxy-2-oxoglutarate aldolase [EC:4.1.2.14 4.1.3.42]	10	29	10	11	16	24	16	19	19	6	7	14	16	12	12	1	1	16	4	5	25	21	37	33	11	2	12	12	30	87	23	5	12	17	73	49	10	10	11	10	9	5	7	17	18	18	4	7	7
K02926 large subunit ribosomal protein L4	175	107	55	31	62	53	73	101	67	43	47	50	124	117	52	62	84	84	116	29	57	88	156	129	130	55	68	50	219	344	222	29	49	48	108	109	192	66	97	38	55	43	45	56	50	36	82	66	52
K00661 maltose O-acetyltransferase [EC:2.3.1.79]	3	8	4	4	16	22	11	10	13	4	12	21	8	10	7	3	8	10	17	6	13	22	7	39	13	7	16	8	22	47	11	1	6	12	25	26	8	4	5	4	9	4	7	9	12	9	3	8	6
K03588 cell division protein FtsW	17	26	28	10	16	42	16	20	18	7	18	24	20	21	16	16	26	34	30	5	7	30	76	75	32	10	19	30	53	139	42	13	19	35	86	74	50	23	20	9	20	7	19	21	11	13	34	19	14
K15912 UDP-N-acetylglucosamine 4,6-dehydratase [EC:4.2.1.135]	20	9	6	3	17	14	19	16	6	6	11	25	16	12	0	4	10	18	3	3	3	10	22	12	20	10	3	8	20	45	15	3	13	10	31	35	12	11	11	5	10	5	5	8	15	12	13	5	7
K05901 biliverdin reductase / flavin reductase [EC:1.3.1.24 1.5.1.30]	4	0	5	0	2	0	0	0	1	0	3	0	1	1	1	0	0	0	1	0	0	0	0	0	0	1	0	0	0	0	0	0	0	0	0	4	0	0	0	0	0	0	0	0	0	1	0	0	0
K22409 N-acetylmuramoyl-L-alanine amidase [EC:3.5.1.28]	1	0	0	0	2	1	0	0	0	0	0	0	0	0	0	0	0	1	0	0	2	0	0	0	0	2	2	0	0	0	0	2	0	3	0	0	1	1	1	0	1	0	1	1	0	0	2	1	0
K12721 L-prolyl-[peptidyl-carrier protein] dehydrogenase [EC:1.3.8.14]	1	0	0	0	0	0	0	0	0	0	0	0	0	0	0	0	0	0	0	0	0	2	0	0	0	0	0	0	0	0	0	0	0	0	0	0	0	0	0	0	0	0	0	0	0	0	0	0	0
K11034 non-hemolytic enterotoxin B/C	0	0	0	0	0	0	0	0	0	0	0	0	0	0	0	0	0	0	0	0	0	0	0	0	0	0	0	0	0	0	0	0	0	0	0	0	0	0	0	0	0	0	0	0	0	0	0	0	0
K09952 CRISPR-associated endonuclease Csn1 [EC:3.1.-.-]	3	0	0	1	0	1	0	1	4	2	3	0	3	0	0	0	0	0	0	0	0	1	0	10	1	0	0	0	6	25	0	0	3	0	0	6	3	0	0	1	1	0	0	0	5	3	0	1	0
K03587 cell division protein FtsI (penicillin-binding protein 3) [EC:3.4.16.4]	31	53	16	13	20	21	20	37	21	7	17	14	25	34	23	6	13	17	11	10	20	34	62	97	20	14	14	29	26	141	22	5	12	22	91	85	25	15	22	10	16	14	21	26	17	23	14	14	11
K00846 ketohexokinase [EC:2.7.1.3]	0	0	0	0	0	0	0	0	3	0	0	0	0	0	0	0	0	0	1	0	1	0	0	0	0	0	0	0	0	0	3	0	0	0	0	0	11	0	0	0	0	0	0	0	0	0	2	1	0
K01176 alpha-amylase [EC:3.2.1.1]	19	39	18	15	40	42	13	19	13	22	36	41	19	24	3	15	49	35	52	47	37	40	84	89	36	17	32	28	85	91	34	12	58	38	176	91	36	13	23	16	27	20	31	16	22	29	16	23	15
K19319 beta-lactamase class D OXA-134 [EC:3.5.2.6]	0	0	0	0	0	0	0	2	0	0	0	0	0	0	0	0	0	0	0	0	0	0	0	0	0	0	0	0	0	0	0	0	0	0	0	0	0	0	0	0	0	0	0	0	0	0	0	0	0
K03573 DNA mismatch repair protein MutH	0	0	0	0	0	0	0	0	0	0	0	0	0	0	0	0	0	4	0	2	0	0	0	0	0	0	0	0	1	0	1	0	0	0	0	0	0	0	0	0	1	0	0	0	0	1	0	0	0
K05570 multicomponent Na+:H+ antiporter subunit F	3	2	4	2	1	5	3	3	0	5	0	2	2	7	2	0	0	7	5	1	5	2	6	25	3	3	2	2	17	35	10	4	5	3	15	15	7	3	6	2	4	6	4	6	3	3	2	7	4
K08682 acyl carrier protein phosphodiesterase [EC:3.1.4.14]	1	1	0	0	0	0	0	0	0	0	0	6	0	0	1	0	0	0	4	0	0	0	0	6	3	0	0	0	0	0	0	4	0	0	3	0	1	2	0	0	0	0	0	1	0	0	0	3	0
K11902 type VI secretion system protein ImpA	17	5	9	9	6	18	10	11	7	8	6	9	15	8	8	5	0	4	5	9	12	15	9	11	13	11	1	8	16	4	12	2	3	8	4	31	3	2	1	3	6	2	3	2	2	5	4	6	7
K13772 Rrf2 family transcriptional regulator, iron-responsive regulator	9	13	6	2	2	4	6	13	4	0	2	2	4	14	5	9	0	3	2	0	4	0	3	1	5	1	0	0	1	4	1	0	0	6	4	0	0	3	2	0	2	1	1	0	1	1	1	2	1
K03549 KUP system potassium uptake protein	0	0	1	0	0	0	0	0	0	0	0	0	0	0	0	0	0	1	0	4	7	0	0	0	1	2	3	5	11	0	0	0	0	1	0	0	10	4	2	2	4	4	5	10	2	4	7	4	2
K11916 serine/threonine-protein kinase Stk1 [EC:2.7.11.-]	0	0	0	0	0	0	0	0	0	0	0	0	1	0	0	0	0	0	0	0	0	0	0	0	0	0	0	0	0	0	0	0	0	0	0	0	0	0	0	0	0	0	0	0	0	0	0	0	0
K20573 2'-deamino-2'-hydroxyneamine 1-alpha-D-kanosaminyltransferase [EC:2.4.1.301]	0	0	0	3	0	0	0	0	0	0	0	0	0	0	0	0	0	0	0	0	0	0	0	0	0	0	0	0	0	0	0	0	0	0	0	0	0	0	0	0	0	0	0	0	0	0	0	0	0
K00428 cytochrome c peroxidase [EC:1.11.1.5]	175	231	281	231	187	202	185	217	237	168	141	133	210	231	268	185	188	173	97	102	173	220	183	124	211	98	151	162	266	289	182	98	133	160	180	150	182	106	85	33	61	57	47	29	25	38	110	92	72
K07026 mannosyl-3-phosphoglycerate phosphatase [EC:3.1.3.70]	2	5	2	1	0	3	4	0	1	0	3	0	0	0	1	0	0	0	3	0	0	3	12	9	1	0	3	5	7	16	0	0	1	1	13	1	0	0	0	0	3	1	1	1	0	4	0	1	1
K14163 bifunctional glutamyl/prolyl-tRNA synthetase [EC:6.1.1.17 6.1.1.15]	0	0	0	0	0	0	0	0	0	0	0	0	0	0	0	0	0	0	0	0	0	0	0	0	0	0	0	0	1	0	0	0	0	0	0	0	0	0	0	0	0	1	0	0	0	0	0	0	0
K02617 phenylacetic acid degradation protein	19	4	3	8	4	12	10	4	5	3	9	10	9	3	1	0	58	6	11	16	10	14	22	17	8	7	12	8	30	17	15	3	3	18	45	34	20	7	10	6	9	8	12	9	6	5	8	5	5
K07059 uncharacterized protein	6	7	6	4	10	15	3	6	10	4	7	14	9	4	9	1	11	21	6	4	11	11	46	79	7	3	14	19	23	82	5	4	12	25	25	16	2	5	1	5	12	10	8	9	7	8	4	5	6
K09790 uncharacterized protein	0	2	0	0	0	1	1	0	1	0	0	2	0	3	0	4	0	11	2	0	0	2	19	3	3	0	1	5	0	2	0	0	0	2	13	0	0	2	5	0	0	3	0	0	1	0	0	0	0
K08522 glycoprotein hormones alpha chain	0	0	0	0	0	0	0	0	0	0	0	0	0	0	0	0	0	0	0	0	0	0	0	0	0	0	0	0	0	0	0	0	0	0	0	0	0	0	0	0	0	0	0	0	1	0	0	0	0
K01525 bis(5'-nucleosyl)-tetraphosphatase (symmetrical) [EC:3.6.1.41]	7	1	1	1	0	0	1	2	3	2	0	0	4	3	2	0	0	0	0	3	5	1	0	0	5	0	1	1	1	0	7	1	0	2	0	0	9	3	2	0	0	1	0	0	0	0	3	1	2
K01419 ATP-dependent HslUV protease, peptidase subunit HslV [EC:3.4.25.2]	32	22	9	8	15	22	16	14	14	18	12	15	12	28	12	8	1	12	17	12	24	13	47	49	20	8	18	26	34	82	24	13	17	42	51	92	16	19	21	13	10	12	3	10	14	9	9	10	18
K00367 ferredoxin-nitrate reductase [EC:1.7.7.2]	74	75	7	1	0	0	54	24	4	4	3	0	82	33	8	0	0	5	4	0	0	0	0	0	2	0	0	1	2	7	0	0	0	0	0	0	1	3	0	0	2	0	0	0	0	0	0	2	0
K18151 ureidoglycolate amidohydrolase [EC:3.5.1.116]	0	1	0	0	0	0	0	0	0	0	0	0	0	0	0	0	0	0	0	1	0	0	7	0	0	0	0	0	1	0	0	0	0	1	0	0	0	0	0	0	0	0	0	0	0	0	0	0	0
K16047 3-hydroxy-9,10-secoandrosta-1,3,5(10)-triene-9,17-dione monooxygenase [EC:1.14.14.12]	15	5	0	0	0	0	10	6	2	5	0	0	15	7	1	0	0	0	0	3	0	0	0	0	1	0	1	0	0	0	2	0	0	0	0	0	2	2	0	1	2	0	0	0	0	0	1	0	0
K01044 carboxylesterase 1 [EC:3.1.1.1]	1	0	0	0	0	0	0	0	0	0	0	1	0	1	0	0	2	0	0	3	2	0	0	0	0	0	4	3	1	0	0	0	2	0	0	0	0	0	0	0	0	0	0	1	0	0	0	0	2
K06406 stage V sporulation protein AD	0	0	0	0	0	0	0	0	0	0	0	0	0	0	0	0	0	0	0	0	0	0	0	0	0	0	0	1	0	0	3	0	0	0	0	0	0	0	0	0	0	0	0	0	0	0	0	0	0
K00031 isocitrate dehydrogenase [EC:1.1.1.42]	190	156	46	32	59	105	130	108	60	40	56	73	175	126	74	55	81	86	144	84	174	177	190	158	321	102	151	134	306	321	445	59	119	108	248	72	178	68	93	36	53	49	43	51	50	39	86	78	76
K23773 LysR family transcriptional regulator, flagellar master operon regulator	0	0	0	0	0	0	0	0	0	0	0	0	0	0	0	0	0	0	0	0	0	0	0	0	0	0	0	0	0	0	2	0	0	0	0	0	0	0	0	0	0	0	0	0	0	0	0	0	0
K02710 photosystem II PsbI protein	0	0	0	0	0	0	1	0	0	0	0	0	0	0	0	0	0	0	0	0	0	0	0	0	0	0	0	0	0	0	0	0	0	0	0	0	4	2	0	0	4	0	3	0	0	0	3	1	0
K23977 L-glutamine---4-(methylsulfanyl)-2-oxobutanoate aminotransferase [EC:2.6.1.117]	0	0	0	0	0	0	0	0	1	0	1	0	0	0	0	0	0	0	0	0	0	1	0	0	0	0	0	0	3	0	0	0	1	0	0	0	0	0	0	0	0	0	0	0	0	0	0	0	0
K03813 molybdenum transport protein [EC:2.4.2.-]	0	0	0	0	0	0	0	0	0	0	0	0	0	0	0	0	0	0	2	0	0	0	0	0	0	0	0	0	0	0	0	0	0	0	0	0	0	0	0	0	0	0	1	0	0	0	0	0	0
K07115 23S rRNA (adenine2030-N6)-methyltransferase [EC:2.1.1.266]	1	0	0	0	0	0	0	0	0	0	0	0	0	0	0	0	0	0	0	0	0	0	0	0	3	0	0	0	0	0	0	0	0	0	0	0	4	1	0	0	0	0	0	2	0	0	0	0	0
K21531 tail sheath protein	0	0	0	0	0	1	0	0	0	0	0	0	0	0	0	0	0	0	0	0	0	0	0	0	0	0	0	0	0	0	3	0	0	0	0	0	0	0	0	0	0	0	0	0	0	0	0	0	0
K08315 hydrogenase 3 maturation protease [EC:3.4.23.51]	0	1	1	3	0	0	0	0	0	0	2	4	0	0	0	0	0	1	0	3	0	0	19	58	2	0	1	1	19	40	2	0	1	5	31	12	0	0	2	0	2	2	2	2	3	7	0	3	1
K00752 hyaluronan synthase [EC:2.4.1.212]	1	0	0	2	0	0	0	1	0	0	0	0	0	2	0	0	0	1	0	1	2	0	0	0	0	1	1	0	3	0	0	0	0	0	5	0	4	1	1	2	1	1	2	0	0	0	4	2	5
K01730 oligogalacturonide lyase [EC:4.2.2.6]	1	2	1	5	1	9	0	4	0	5	2	1	2	6	1	0	0	4	4	7	3	6	13	3	7	5	4	8	3	9	3	1	0	7	9	9	1	3	3	1	2	3	5	1	4	4	3	3	3
K01706 glucarate dehydratase [EC:4.2.1.40]	2	7	4	0	5	0	3	1	1	0	5	2	7	2	1	0	0	6	1	1	2	2	6	16	5	0	3	3	5	23	2	0	6	4	11	0	1	0	4	0	2	0	2	1	0	1	1	0	1
K06013 STE24 endopeptidase [EC:3.4.24.84]	25	1	9	1	1	21	10	8	4	7	7	25	15	7	11	8	0	5	2	1	8	25	31	21	32	4	15	5	21	21	36	3	6	2	28	29	24	8	13	4	6	4	9	6	6	6	7	14	9
K00226 dihydroorotate dehydrogenase (fumarate) [EC:1.3.98.1]	84	85	39	22	29	64	34	64	43	21	28	51	51	80	38	37	74	40	38	29	44	76	73	74	86	47	32	41	110	117	78	43	27	39	79	43	42	42	36	17	16	19	19	20	22	22	39	27	34
K02622 topoisomerase IV subunit B [EC:5.6.2.2]	45	25	12	6	11	8	29	32	9	5	7	9	37	13	16	11	0	15	8	8	16	11	25	20	31	7	8	9	22	32	50	7	1	8	34	11	31	20	11	7	5	6	4	2	5	0	18	11	15
K22161 F420H2 dehydrogenase subunit D [EC:1.5.98.3]	0	0	0	1	10	22	0	6	1	3	18	33	1	4	0	0	8	27	0	3	8	8	20	39	3	0	13	1	32	52	7	0	13	13	48	19	2	1	2	11	92	4	12	7	1	1	2	1	3
K08295 2-aminobenzoate-CoA ligase [EC:6.2.1.32]	18	23	25	31	25	35	27	18	33	23	19	23	16	22	39	21	17	31	7	12	12	18	26	13	19	12	35	20	54	71	10	14	13	11	6	16	10	13	29	20	25	16	1	3	1	2	10	22	15
K19335 TetR/AcrR family transcriptional regulator, repressor for divergent bdcA	0	0	0	0	0	0	0	0	0	0	0	0	0	0	0	0	0	0	0	0	0	0	0	0	0	0	0	0	0	0	0	0	0	0	0	0	0	0	0	0	0	0	0	0	0	0	0	0	0
K14052 putrescine importer	0	0	0	0	0	0	0	0	0	0	0	0	0	0	0	0	0	1	0	0	0	1	3	2	0	0	0	0	1	11	0	0	0	2	0	0	0	0	2	2	0	0	1	1	0	1	0	0	0
K10228 polyol transport system permease protein	4	3	2	0	2	3	1	10	2	2	2	0	1	9	4	5	13	2	8	1	6	11	6	15	10	4	7	6	14	29	7	2	4	7	9	25	9	2	0	0	0	1	1	0	1	1	1	3	2
K08695 anthocyanidin reductase [EC:1.3.1.77]	3	0	0	0	0	1	0	0	0	1	0	1	1	1	1	0	0	3	2	0	5	4	17	4	0	0	1	1	3	0	0	2	1	0	1	0	0	0	1	0	0	0	0	0	0	0	2	0	1
K00650 lecithin-cholesterol acyltransferase [EC:2.3.1.43]	0	0	0	0	0	0	0	0	0	0	0	0	0	0	0	0	0	0	0	0	3	1	1	0	0	1	1	0	1	0	0	0	0	5	5	0	0	0	0	0	0	0	0	0	0	0	0	1	0
K03146 cysteine-dependent adenosine diphosphate thiazole synthase [EC:2.4.2.60]	7	11	8	1	13	21	4	9	6	1	12	11	3	6	9	16	87	24	1	2	14	21	57	94	2	6	10	14	39	122	2	2	13	27	45	21	0	1	3	1	17	7	11	4	2	16	0	5	5
K18197 rhamnogalacturonan endolyase [EC:4.2.2.23]	4	7	4	4	15	14	6	2	6	12	13	18	0	3	13	8	51	24	3	5	19	15	83	185	1	1	17	17	41	99	2	7	17	16	124	206	0	2	6	3	7	6	10	10	9	19	0	2	4
K15973 MarR family transcriptional regulator, 2-MHQ and catechol-resistance regulon repressor	24	9	5	8	3	17	8	15	5	10	1	2	12	10	10	0	15	3	8	1	4	14	32	11	3	0	1	2	19	46	6	2	8	2	29	20	6	7	12	4	2	4	1	4	3	4	9	4	5
K25517 mevalonate 5-phosphate dehydratase large subunit [EC:4.2.1.-]	1	1	0	0	0	0	0	0	0	0	0	5	0	0	0	5	7	5	0	0	0	0	3	0	0	0	0	2	0	0	0	0	0	2	1	0	0	0	0	0	0	0	0	0	0	0	0	0	0
K15581 oligopeptide transport system permease protein	40	66	26	13	32	45	21	53	24	24	37	31	31	30	37	9	13	68	18	9	21	25	108	67	29	9	28	28	79	149	12	14	33	47	53	72	12	3	12	3	18	6	15	10	14	10	2	9	4
K05796 electron transport protein HydN	2	4	12	1	8	19	2	6	8	4	17	23	3	6	8	1	18	15	3	9	17	22	57	53	4	4	14	9	44	108	5	10	4	13	39	24	2	3	1	0	6	7	7	2	1	5	4	10	1
K02217 ferritin [EC:1.16.3.2]	80	83	23	24	61	70	62	72	56	48	69	108	64	75	37	31	44	66	58	49	84	123	208	162	131	58	54	69	219	247	111	24	51	83	171	156	41	52	59	29	53	55	44	48	43	57	34	54	57
K12526 bifunctional diaminopimelate decarboxylase / aspartate kinase [EC:4.1.1.20 2.7.2.4]	8	0	0	0	0	0	1	0	1	0	0	0	1	1	0	0	0	0	0	0	0	0	0	0	1	0	0	0	0	0	0	0	0	0	0	0	1	0	1	0	0	0	0	0	2	0	0	0	2
K09727 uncharacterized protein	0	0	0	0	0	0	0	0	0	0	0	0	0	0	0	0	0	0	0	0	0	0	0	0	0	0	0	0	0	0	0	0	0	0	0	0	0	0	0	0	8	4	1	0	0	0	0	0	0
K06566 interferon induced transmembrane protein	1	0	0	0	0	0	0	0	0	0	0	0	0	0	0	0	0	0	0	0	0	0	0	0	0	0	0	0	0	0	0	0	0	0	0	0	0	0	0	0	0	0	0	0	0	0	0	1	0
K00996 undecaprenyl-phosphate galactose phosphotransferase [EC:2.7.8.6]	29	32	23	13	25	28	23	21	19	10	13	20	9	20	31	7	43	23	3	17	30	21	39	46	23	15	17	20	29	55	26	7	11	15	44	55	55	16	22	8	8	12	8	2	4	5	30	17	10
K19165 antitoxin Phd	0	0	1	0	1	0	0	0	2	0	0	0	2	4	0	0	0	0	0	0	0	0	0	0	0	0	0	2	0	2	1	0	0	0	0	0	0	1	1	0	0	0	0	0	0	0	5	1	2
K06160 putative pyoverdin transport system ATP-binding/permease protein	1	0	0	2	4	7	0	2	0	3	4	4	0	1	0	0	0	6	2	5	1	7	0	0	3	0	0	0	9	16	2	0	0	4	11	0	1	1	2	2	2	0	1	2	0	0	1	2	1
K00151 5-carboxymethyl-2-hydroxymuconic-semialdehyde dehydrogenase [EC:1.2.1.60]	6	6	0	0	0	0	2	2	0	0	0	0	1	2	0	1	0	0	0	0	0	0	0	0	0	0	0	1	0	0	0	0	0	0	0	0	0	1	0	0	0	1	0	0	0	0	0	0	0
K04525 serpin A	0	0	0	0	0	0	0	1	0	0	1	0	1	3	2	0	2	4	9	4	0	1	5	0	4	2	4	1	1	6	2	1	5	1	0	0	1	2	1	0	1	1	4	0	0	2	0	0	1
K03242 translation initiation factor 2 subunit 3	9	13	0	8	20	39	5	4	7	4	22	39	6	10	6	0	14	38	0	5	16	30	86	70	10	12	25	21	38	91	7	21	24	40	117	31	0	8	7	8	30	19	28	23	11	19	0	5	8
K01114 phospholipase C [EC:3.1.4.3]	14	2	0	1	1	4	6	5	1	0	0	4	8	3	0	1	6	10	0	5	0	0	1	1	1	1	0	1	0	0	0	0	2	0	0	0	0	0	3	2	0	0	0	0	0	0	0	1	1
K15055 2-nitrobenzoate nitroreductase [EC:1.7.1.-]	5	4	4	1	1	0	0	1	2	1	2	0	1	2	2	0	0	1	0	0	1	1	9	0	2	1	2	4	6	0	1	4	1	1	0	0	1	1	1	3	1	0	0	0	1	0	0	2	0
K07879 Ras-related protein Rab-4A	0	0	0	0	0	0	0	0	0	0	0	0	0	0	0	0	0	0	4	0	0	3	5	1	0	0	0	0	0	0	0	0	0	0	9	0	0	0	0	0	1	0	0	0	2	0	0	0	1
K07899 Ras-related protein Rab-9A	0	0	0	0	0	7	0	0	0	0	1	0	0	0	0	0	0	0	0	1	0	3	0	3	0	0	0	0	0	0	0	0	0	0	4	14	0	0	0	0	1	0	1	0	2	0	0	0	0
K04771 serine protease Do [EC:3.4.21.107]	202	158	61	69	68	87	96	116	63	67	73	111	176	110	101	49	87	106	49	47	85	119	224	238	104	40	62	78	221	380	80	37	64	92	215	134	405	155	112	40	64	42	72	58	44	50	218	110	88
K03929 para-nitrobenzyl esterase [EC:3.1.1.-]	22	13	9	11	21	29	9	11	17	12	27	22	12	6	9	10	25	19	2	14	32	44	44	62	23	13	31	18	30	120	15	11	27	43	72	25	6	6	9	4	14	6	8	6	6	7	5	4	8
K07311 Tat-targeted selenate reductase subunit YnfG	34	35	6	21	3	10	22	23	6	3	7	11	24	31	7	18	27	19	1	2	8	5	10	26	3	4	4	9	10	12	8	4	1	7	25	6	4	0	1	0	1	0	0	1	0	2	5	1	1
K17495 CUB and sushi domain-containing protein	0	0	0	0	0	0	0	0	0	0	0	0	0	2	0	0	0	0	0	0	0	0	0	0	0	0	0	0	0	0	0	0	0	0	0	0	0	0	0	0	0	0	0	0	0	0	0	0	0
K06419 small acid-soluble spore protein B (major beta-type SASP)	4	2	2	2	1	2	5	0	2	0	0	0	5	0	2	3	0	3	16	21	27	20	4	0	21	26	17	38	11	0	11	34	23	9	10	6	1	3	5	24	10	13	15	23	22	2	5	9	3
K00342 NADH-quinone oxidoreductase subunit M [EC:7.1.1.2]	130	98	47	24	52	62	71	77	34	38	46	64	78	70	42	30	24	54	69	34	69	66	96	91	95	53	45	54	114	168	184	40	48	50	108	78	92	31	45	20	39	23	33	20	23	19	52	47	36
K00962 polyribonucleotide nucleotidyltransferase [EC:2.7.7.8]	378	295	138	137	200	321	216	221	183	119	231	242	220	277	115	170	338	340	131	93	142	288	590	651	241	122	126	137	483	991	214	86	109	199	520	421	293	182	219	99	177	146	184	158	170	211	165	183	166
K24967 GntR family transcriptional regulator, N-acetylglucosamine utilization regulator	0	0	0	0	0	1	0	0	0	0	0	0	0	1	1	0	0	0	0	0	0	0	0	4	0	0	0	0	2	2	0	0	0	0	0	0	0	0	0	0	0	0	0	2	1	0	0	0	0
K09934 uncharacterized protein	0	0	0	0	0	0	0	0	0	0	0	0	0	0	0	0	0	0	0	0	0	0	0	0	0	0	0	0	0	0	0	0	0	0	0	0	1	0	1	0	1	0	1	0	0	0	1	0	0
K06402 stage IV sporulation protein FB [EC:3.4.24.-]	2	14	3	1	4	3	6	7	8	1	10	2	16	20	13	0	6	16	3	3	11	20	16	30	8	13	5	8	19	79	13	4	5	12	12	78	18	8	26	9	13	8	22	11	6	7	8	20	12
K03600 stringent starvation protein B	7	5	1	0	0	0	1	2	0	0	0	0	4	1	0	0	0	0	0	0	0	0	0	0	4	1	0	0	1	8	0	0	0	0	0	0	0	2	0	0	0	1	0	0	0	1	0	0	0
K19511 peroxidase [EC:1.11.1.7]	10	6	0	2	0	1	7	8	1	0	1	0	7	2	2	0	0	0	1	2	0	0	0	0	3	1	0	3	0	0	0	2	0	0	0	0	1	1	0	0	0	0	0	0	0	0	0	0	0
K15784 N2-acetyl-L-2,4-diaminobutanoate deacetylase [EC:3.5.1.125]	7	3	1	4	3	1	0	2	2	2	6	1	2	2	0	3	0	6	0	5	2	1	8	25	0	6	3	2	11	24	0	0	1	4	16	40	0	0	0	0	2	1	1	0	1	3	0	1	1
K06898 pyridinium-3,5-biscarboxylic acid mononucleotide synthase [EC:2.5.1.143]	21	35	13	19	28	31	19	16	20	13	25	32	7	17	20	17	33	19	11	20	26	15	58	54	29	19	13	14	42	74	17	12	17	36	75	18	12	4	11	7	16	2	8	10	13	14	7	20	9
K08261 D-sorbitol dehydrogenase (acceptor) [EC:1.1.99.21]	8	4	4	2	4	0	8	2	1	2	0	4	10	4	8	0	16	13	0	2	1	9	3	0	5	0	3	2	9	15	1	0	0	7	0	0	0	0	1	2	1	1	0	2	0	0	1	1	2
K03622 archaea-specific DNA-binding protein	8	8	4	9	23	33	4	15	5	6	35	62	2	6	6	5	13	50	4	11	30	51	191	205	11	8	35	43	101	214	10	1	48	43	151	105	0	9	12	11	54	41	29	22	23	43	2	14	16
K13636 LysR family transcriptional regulator, D-serine deaminase activator	0	0	0	0	0	0	1	0	0	0	0	0	0	1	0	0	0	0	0	0	0	0	0	0	0	0	0	0	0	0	0	0	0	0	0	0	0	0	0	0	0	0	0	0	0	0	0	0	0
K07126 uncharacterized protein	14	1	7	0	0	7	2	8	7	1	0	2	5	3	5	0	0	1	4	1	2	1	0	8	3	2	9	2	2	7	0	0	0	0	0	0	12	7	2	1	2	1	2	0	0	0	3	2	2
K01520 dUTP pyrophosphatase [EC:3.6.1.23]	15	13	20	12	8	9	14	10	9	4	12	11	17	20	5	8	10	14	8	7	4	9	47	23	16	12	17	8	31	62	9	8	13	19	25	42	6	7	15	3	6	4	5	9	10	13	4	10	5
K00854 xylulokinase [EC:2.7.1.17]	60	78	51	49	78	101	43	54	63	45	66	123	37	55	62	50	98	83	29	34	85	143	259	237	52	39	67	88	242	381	51	35	59	99	259	249	29	29	43	30	61	38	59	46	80	107	28	40	43
K18481 Mce-associated membrane protein	0	0	0	0	0	0	0	0	0	0	0	0	0	0	0	0	0	0	0	0	0	0	0	0	0	0	0	0	0	0	0	0	0	0	0	0	0	2	0	0	0	0	0	0	0	0	0	0	0
K00366 ferredoxin-nitrite reductase [EC:1.7.7.1]	29	7	0	2	0	1	14	3	2	0	0	0	6	4	0	8	0	6	0	0	1	2	0	0	0	0	0	0	1	3	0	0	0	0	0	0	2	0	2	2	1	0	0	0	0	0	0	1	2
K10005 glutamate transport system substrate-binding protein	2	1	1	0	0	0	3	0	3	0	0	0	0	1	1	0	0	2	1	0	1	3	0	0	6	0	0	0	0	0	4	0	0	0	0	0	0	0	1	0	0	0	0	0	0	1	0	0	0
K10912 two-component system, repressor protein LuxO	1	1	2	0	0	6	4	1	4	1	0	2	1	4	1	0	0	0	0	0	0	0	1	0	1	1	0	0	0	0	1	0	0	1	0	0	75	8	2	0	2	0	0	0	0	1	20	6	5
K01194 alpha,alpha-trehalase [EC:3.2.1.28]	3	2	5	4	5	11	1	1	4	3	4	5	3	5	0	0	0	10	2	9	2	2	9	7	5	1	9	3	15	7	3	4	4	9	18	41	2	2	7	4	1	0	0	0	0	1	2	3	2
K03410 chemotaxis protein CheC	9	2	0	0	1	6	2	3	1	4	7	12	5	3	5	8	0	4	9	0	0	1	3	7	9	3	3	13	11	3	9	0	2	0	13	26	20	3	3	1	3	2	2	1	1	3	11	5	2
K07749 formyl-CoA transferase [EC:2.8.3.16]	67	57	57	57	693	1088	38	43	64	53	1130	766	54	35	57	17	831	806	167	440	505	625	1393	1094	152	422	685	724	901	1771	144	327	320	539	1321	1323	12	109	363	236	366	85	40	13	19	22	56	242	251
K24310 UDP-N-acetyl-alpha-D-quinovosamine dehydrogenase [EC:1.1.1.426]	1	0	0	0	0	0	0	0	0	0	0	0	0	2	0	0	0	0	0	0	0	3	0	0	0	0	0	0	0	0	1	0	0	0	0	0	0	0	0	0	0	0	0	0	0	0	0	0	1
K17489 methylmalonyl-CoA carboxyltransferase 12S subunit [EC:2.1.3.1]	5	12	7	7	4	7	6	11	6	3	8	3	10	6	8	13	0	8	2	8	6	8	13	6	9	5	7	12	34	26	5	9	8	11	7	22	3	2	5	1	4	4	10	4	12	10	4	9	4
K01502 aliphatic nitrilase [EC:3.5.5.7]	4	7	3	4	1	6	5	6	3	6	7	6	6	5	1	0	0	4	18	0	2	7	27	5	2	3	0	12	16	9	5	1	1	2	0	1	0	2	1	2	0	1	0	0	0	0	2	1	0
K00158 pyruvate oxidase [EC:1.2.3.3]	13	6	1	3	1	3	3	3	0	2	0	1	16	3	4	0	0	0	0	3	6	2	2	0	4	3	0	1	0	1	0	7	0	0	0	12	0	1	0	0	0	0	0	0	0	2	1	0	0
K04486 histidinol-phosphatase (PHP family) [EC:3.1.3.15]	7	11	4	4	1	4	4	4	2	5	2	4	7	11	14	2	0	11	1	6	12	8	23	13	5	4	2	11	28	24	9	5	9	4	19	8	5	1	3	3	3	6	5	1	4	3	3	4	2
K21309 sulfite dehydrogenase (quinone) subunit SoeC	3	2	1	1	0	0	2	1	0	0	0	0	3	3	0	0	0	0	0	0	0	0	4	0	3	1	0	0	1	0	3	0	0	1	0	0	2	2	0	0	0	0	0	0	0	0	1	1	1
K02237 competence protein ComEA	2	13	10	1	14	5	7	17	2	5	16	2	5	4	11	11	0	6	10	18	7	10	45	73	8	10	20	7	41	89	7	11	8	21	62	78	40	8	9	3	14	5	3	18	12	7	28	7	7
K18232 oleandomycin transport system ATP-binding protein	8	0	2	1	0	4	0	0	8	4	2	5	0	0	2	0	0	3	0	2	4	1	9	15	4	0	9	6	5	45	0	0	3	0	54	60	1	0	2	0	0	0	0	0	2	5	1	2	1
K03413 two-component system, chemotaxis family, chemotaxis protein CheY	152	179	83	85	124	110	99	142	77	70	89	86	110	133	93	41	104	105	127	72	118	136	229	164	180	77	112	94	227	290	242	70	108	101	207	166	165	83	59	31	64	58	47	33	40	33	76	80	46
K00421 laccase [EC:1.10.3.2]	0	0	0	0	0	0	0	0	1	0	0	0	0	0	0	0	0	0	0	0	0	0	0	0	0	0	0	0	0	0	0	0	0	0	0	0	0	0	0	0	0	0	0	0	0	0	0	0	0
K09858 SEC-C motif domain protein	4	1	0	0	1	0	0	4	2	1	2	0	11	1	3	0	0	0	0	1	1	1	0	0	5	3	0	3	4	0	12	0	4	2	0	0	6	1	1	2	2	0	0	0	0	0	3	3	6
K09005 uncharacterized protein	6	5	2	5	3	3	4	3	0	0	1	4	2	4	9	4	0	4	4	0	2	8	6	15	3	2	3	5	3	10	1	6	3	1	7	11	1	0	3	1	5	1	3	2	1	7	4	2	1
K16112 nonribosomal peptide synthetase protein BlmIV	0	0	1	0	0	0	0	0	0	0	0	0	0	0	0	0	0	0	0	0	0	0	0	0	0	0	0	3	0	0	0	0	0	0	0	0	0	0	0	0	0	0	0	0	0	0	0	0	0
K06447 succinylglutamic semialdehyde dehydrogenase [EC:1.2.1.71]	12	0	0	0	0	0	0	1	1	1	0	0	2	1	0	0	0	0	0	0	0	0	0	0	0	2	0	0	0	1	1	0	0	1	0	0	1	0	0	0	0	0	0	0	0	0	0	0	0
K02968 small subunit ribosomal protein S20	44	24	18	18	33	7	14	20	20	12	24	27	44	22	16	17	47	27	22	13	16	20	77	60	55	27	17	15	87	89	64	17	12	28	33	23	48	66	57	23	26	25	28	38	18	14	39	26	41
K03324 phosphate:Na+ symporter	42	37	24	18	25	5	26	39	21	22	16	31	35	39	36	28	19	33	16	12	17	34	34	43	67	18	26	26	64	73	65	13	19	17	56	28	25	19	13	7	19	13	20	21	17	26	14	10	18
K21488 antitoxin YobK	0	0	0	0	0	0	0	0	0	0	0	0	0	0	0	0	0	0	0	0	0	0	0	0	0	0	0	1	0	0	0	0	0	0	0	0	0	0	0	0	0	0	0	0	0	0	0	0	0
K01574 acetoacetate decarboxylase [EC:4.1.1.4]	7	10	4	0	7	0	6	16	1	0	4	5	5	6	2	0	0	3	0	1	2	15	31	14	6	4	4	8	7	32	1	0	15	9	21	8	1	4	3	2	5	6	4	5	5	10	2	6	3
K25010 (4-O-methyl)-D-glucuronate---lignin esterase [EC:3.1.1.117]	5	6	4	8	2	3	2	1	9	2	3	4	4	3	5	1	9	2	4	12	3	5	34	13	3	0	3	13	16	39	1	2	16	12	17	26	3	5	10	5	7	4	7	9	13	11	5	3	4
K14057 LysR family transcriptional regulator, regulator of abg operon	0	0	0	0	0	0	0	0	3	0	0	0	0	0	0	0	0	0	0	0	0	0	0	0	0	0	0	0	0	0	0	0	0	0	0	0	0	0	0	0	0	0	0	0	0	0	0	0	1
K04950 cyclic nucleotide gated channel alpha 3	0	1	0	2	0	0	1	0	1	0	0	0	0	4	7	1	0	0	0	0	0	0	0	0	0	0	0	0	0	0	0	0	2	0	0	0	0	0	0	0	0	0	0	0	0	0	0	0	0
K18881 D-lactate dehydratase [EC:4.2.1.130]	0	0	0	0	0	0	0	0	0	0	0	0	0	0	0	0	0	0	0	0	0	0	0	0	0	0	0	0	0	0	0	0	0	0	0	0	0	0	0	0	0	0	0	0	0	0	0	0	0
K16167 alkylresorcinol/alkylpyrone synthase	3	3	1	0	1	0	1	0	0	0	1	3	2	0	0	0	0	0	5	0	2	0	2	0	3	1	0	0	0	1	0	0	0	4	0	0	0	1	0	0	0	0	0	1	0	0	0	0	1
K07647 two-component system, OmpR family, sensor histidine kinase TorS [EC:2.7.13.3]	0	0	0	0	0	0	0	0	0	0	0	0	1	1	0	0	0	0	0	0	0	0	0	0	0	0	0	0	0	0	0	0	0	0	0	0	0	0	0	0	0	1	0	0	0	0	0	0	0
K01146 protein Xni	1	0	0	0	0	0	0	0	0	0	0	0	1	0	0	0	0	0	0	0	0	0	0	0	0	0	0	0	0	0	0	0	0	0	0	0	0	0	0	0	0	0	0	0	1	0	0	0	0
K04013 cytochrome c-type protein NrfB	0	1	0	0	0	0	1	4	0	0	0	0	0	0	0	0	0	0	6	0	0	0	0	0	0	1	0	0	0	0	2	0	0	0	0	0	1	0	0	0	0	0	0	0	0	0	1	0	0
K07320 ribosomal protein L3 glutamine methyltransferase [EC:2.1.1.298]	5	3	0	0	0	0	1	0	0	0	0	0	2	1	1	0	0	0	0	0	0	3	1	0	2	1	0	0	3	0	6	0	0	0	0	0	4	5	3	0	0	4	0	0	0	0	1	4	8
K07061 CRISPR-associated protein Cmr1	0	2	0	0	0	0	0	3	5	0	0	0	1	1	0	0	0	0	0	0	0	0	0	0	6	0	0	0	2	4	0	0	0	1	0	0	4	0	0	0	2	1	0	0	1	0	1	0	0
K02931 large subunit ribosomal protein L5	235	167	75	47	77	129	137	128	102	72	102	96	193	127	69	54	218	117	102	71	94	85	265	204	259	89	78	54	269	391	273	45	62	96	140	239	291	103	118	27	75	55	77	62	84	79	144	108	74
K24867 dihydro-heme d1 dehydrogenase	0	0	0	0	0	0	0	0	0	0	0	0	0	0	0	0	0	0	0	0	0	0	0	0	0	0	0	0	0	0	0	0	0	0	0	0	0	0	0	0	0	0	0	0	0	0	0	0	0
K15094 (-)-menthol dehydrogenase [EC:1.1.1.207]	0	0	0	0	0	0	0	0	0	0	0	0	0	0	0	0	0	0	0	0	0	0	0	0	0	0	0	0	1	0	0	0	0	0	0	0	0	0	0	0	0	0	0	0	0	0	0	0	0
K02093 allophycocyanin beta subunit	1	5	5	0	0	0	4	2	1	0	0	0	0	1	1	0	0	0	3	1	0	4	0	0	6	1	0	0	0	0	9	0	0	0	0	0	75	9	6	4	11	8	14	6	4	2	10	5	14
K09145 uncharacterized protein	0	0	0	0	0	0	0	0	0	0	0	0	1	0	0	0	0	1	0	0	0	0	0	2	0	0	0	0	1	0	1	0	0	0	5	0	0	0	0	0	0	0	0	0	0	0	0	0	0
K20478 golgin subfamily B member 1	0	0	0	0	0	0	0	0	0	0	0	6	0	0	0	0	0	0	0	0	0	0	0	0	0	0	0	0	0	0	0	0	0	1	0	0	0	0	0	0	1	1	0	0	0	3	0	0	0
K08259 lysostaphin [EC:3.4.24.75]	29	26	8	7	12	20	21	21	22	10	21	8	35	25	15	24	6	14	13	10	25	18	52	41	35	8	10	15	43	92	24	15	30	24	51	75	43	30	37	24	53	27	112	25	17	3	25	31	31
K02033 peptide/nickel transport system permease protein	305	362	232	167	266	355	201	309	222	213	287	413	220	285	199	191	302	481	132	160	254	402	924	663	234	170	295	343	724	1655	234	128	249	344	908	746	118	71	110	69	141	102	140	99	119	144	80	101	80
K07716 two-component system, cell cycle sensor histidine kinase PleC [EC:2.7.13.3]	4	2	0	4	2	5	2	1	3	0	4	5	7	7	1	2	26	0	0	3	0	5	10	3	5	1	6	5	5	22	3	1	10	8	6	0	15	7	2	1	16	2	3	4	1	5	12	4	1
K16435 dTDP-4-dehydro-6-deoxy-alpha-D-glucopyranose 2,3-dehydratase [EC:4.2.1.159]	0	0	0	0	0	4	1	4	1	0	0	1	0	0	0	0	0	0	2	1	0	3	0	0	1	0	0	0	0	1	1	0	0	0	0	0	1	0	0	0	0	0	1	1	0	0	0	0	0
K11744 AI-2 transport protein TqsA	10	9	13	9	2	8	14	9	13	2	16	8	10	22	12	1	4	7	3	3	5	6	28	26	19	7	11	5	18	15	16	7	5	17	19	0	4	5	2	3	3	1	3	2	3	0	5	4	5
K12677 clavulanate-9-aldehyde reducatase	0	0	0	0	0	0	0	0	1	0	0	2	2	0	0	0	11	0	0	0	0	0	0	0	0	0	0	0	1	0	0	0	0	0	4	0	1	0	0	1	0	0	0	0	0	0	0	0	0
K01218 mannan endo-1,4-beta-mannosidase [EC:3.2.1.78]	4	0	6	13	11	6	2	6	3	7	5	4	1	6	2	4	7	7	0	3	6	13	33	56	7	0	8	6	25	70	5	9	5	15	27	59	4	3	8	2	5	1	5	7	9	10	1	4	0
K03520 aerobic carbon-monoxide dehydrogenase large subunit [EC:1.2.5.3]	213	117	44	20	45	61	80	79	34	32	54	40	148	72	35	25	34	37	19	25	29	38	171	190	22	19	41	41	124	236	38	20	17	51	165	100	47	23	22	20	30	31	20	19	13	17	21	32	15
K09715 uncharacterized protein	0	0	0	0	0	0	0	0	0	4	0	6	0	1	5	3	0	0	0	0	0	1	0	0	0	0	0	3	0	0	0	0	0	0	0	0	0	0	0	0	0	0	2	0	0	0	0	0	0
K19125 CRISPR system Cascade subunit CasD	0	0	0	0	1	2	0	2	0	0	0	3	1	0	0	0	0	9	1	1	3	2	3	7	0	0	0	0	2	3	2	0	2	7	0	0	2	0	1	1	2	2	5	1	3	2	2	2	1
K15570 naphthyl-2-methylsuccinate CoA transferase subunit [EC:2.8.3.-]	0	1	0	0	0	0	1	1	0	2	0	1	0	0	0	0	0	1	0	0	1	8	6	1	1	0	1	1	13	8	1	0	0	0	26	0	0	0	0	0	2	0	0	0	2	0	0	0	1
K00505 tyrosinase [EC:1.14.18.1]	3	5	0	1	0	0	0	3	0	0	0	0	1	2	1	0	0	0	0	2	0	0	16	12	2	0	0	0	5	10	0	0	0	0	17	0	8	1	0	1	0	0	0	0	0	0	0	0	0
K02618 oxepin-CoA hydrolase / 3-oxo-5,6-dehydrosuberyl-CoA semialdehyde dehydrogenase [EC:3.3.2.12 1.2.1.91]	11	2	1	0	1	0	6	3	4	0	1	1	7	6	1	0	0	1	0	0	0	1	4	0	3	2	0	0	1	0	1	2	0	1	0	0	0	0	0	1	0	0	0	0	0	0	0	3	1
K23684 dolichol-phosphate hexosyltransferase [EC:2.4.1.-]	0	0	0	0	0	0	0	0	0	0	0	0	0	0	0	0	0	0	0	0	0	0	0	2	0	0	0	0	0	0	0	0	0	0	0	0	0	0	0	0	0	0	0	0	0	0	0	0	0
K03049 DNA-directed RNA polymerase subunit E' [EC:2.7.7.6]	13	7	4	5	20	42	12	16	11	7	35	24	4	20	5	7	30	27	4	6	12	16	87	50	9	7	8	9	64	102	5	11	10	18	50	26	4	3	7	5	29	13	21	13	13	20	7	8	11
K01771 1-phosphatidylinositol phosphodiesterase [EC:4.6.1.13]	0	1	0	2	1	8	0	1	0	3	4	6	3	0	1	0	0	5	0	0	0	0	2	0	0	0	0	0	0	0	0	1	0	1	0	1	9	1	1	0	0	0	0	0	0	0	5	0	1
K23270 phosphoribosylformylglycinamidine synthase subunit PurSL [EC:6.3.5.3]	1	2	0	1	0	0	0	1	0	2	4	2	5	4	1	4	9	1	2	8	2	3	1	3	11	0	0	3	8	2	9	2	1	5	15	0	8	0	2	0	1	0	1	0	0	1	4	4	1
K20078 cytochrome P450 StaP [EC:1.13.12.-]	0	1	0	0	0	0	0	0	0	0	0	0	0	0	0	0	0	0	0	0	0	0	0	0	0	0	0	0	0	0	0	0	0	0	0	0	0	0	0	0	0	0	0	0	0	0	0	0	0
K19336 cyclic-di-GMP-binding biofilm dispersal mediator protein	1	0	0	1	0	0	1	4	0	0	0	0	1	0	0	0	0	0	0	0	0	0	0	0	0	0	0	0	0	0	0	0	0	0	0	0	1	1	0	0	0	0	0	0	0	0	0	0	0
K01906 6-carboxyhexanoate--CoA ligase [EC:6.2.1.14]	0	0	0	0	0	0	0	0	0	0	0	0	0	0	0	0	0	0	0	0	0	0	0	0	0	0	0	0	0	0	0	0	0	0	0	0	0	0	0	0	0	0	0	0	0	0	0	0	0
K19266 lactaldehyde dehydrogenase [EC:1.2.1.22]	17	8	1	5	1	1	4	6	4	0	0	0	3	6	1	1	0	1	0	0	0	0	0	5	0	0	0	1	3	5	7	1	1	3	0	0	0	0	0	0	1	1	4	0	0	1	0	1	1
K11529 glycerate 2-kinase [EC:2.7.1.165]	37	22	23	13	8	32	25	20	8	13	6	23	16	11	14	7	32	22	6	6	16	21	56	74	12	9	10	31	51	76	10	3	18	18	54	49	9	9	5	5	11	4	5	16	9	9	3	8	9
K00876 uridine kinase [EC:2.7.1.48]	20	21	14	15	21	31	19	11	17	20	6	15	10	11	7	11	20	14	25	4	16	26	54	27	21	11	8	31	49	77	36	6	10	15	54	43	11	10	18	9	7	8	21	10	18	17	7	8	15
K01811 alpha-D-xyloside xylohydrolase [EC:3.2.1.177]	9	7	3	7	13	10	10	5	9	5	19	17	6	7	8	12	21	10	9	2	20	19	38	95	19	5	13	18	27	71	7	3	12	12	21	117	7	5	10	7	7	10	6	5	10	7	2	11	9
K13077 flavone synthase I [EC:1.14.20.5]	0	0	0	0	0	0	0	1	0	0	0	0	0	0	0	0	0	0	0	0	0	0	0	0	0	0	0	0	0	0	0	0	0	0	0	0	0	0	0	0	0	0	0	0	0	0	0	0	0
K05887 quinate/shikimate dehydrogenase [EC:1.1.1.282]	0	0	0	0	0	0	0	0	0	0	0	0	0	0	0	0	0	0	0	0	0	0	0	0	0	0	0	0	0	0	0	0	0	0	1	0	0	0	0	0	0	0	0	0	0	0	0	0	0
K02825 pyrimidine operon attenuation protein / uracil phosphoribosyltransferase [EC:2.4.2.9]	16	15	5	15	7	21	16	11	10	6	12	9	13	25	17	4	12	13	8	6	14	31	42	48	10	8	6	8	38	47	12	5	18	27	35	48	16	13	8	5	10	9	16	10	11	6	4	11	7
K20487 two-component system, OmpR family, lantibiotic biosynthesis sensor histidine kinase NisK/SpaK [EC:2.7.13.3]	0	0	0	0	0	0	0	0	0	0	0	0	0	0	2	0	0	0	0	0	0	0	0	0	0	0	0	0	0	0	0	0	0	0	0	0	0	0	0	0	0	0	0	1	0	0	0	0	0
K07789 multidrug efflux pump	0	0	0	0	0	0	0	0	0	0	0	0	0	0	0	0	0	0	0	0	0	0	0	0	0	0	0	0	0	0	0	0	0	1	0	0	2	0	2	0	2	1	0	1	0	0	0	0	0
K13854 MFS transporter, SP family, glucose uniporter	2	0	0	0	0	0	1	0	0	0	0	0	0	1	0	0	0	0	0	2	0	7	0	0	2	2	0	0	0	3	0	1	0	0	0	0	0	0	0	0	0	0	0	0	0	0	0	0	0
K00333 NADH-quinone oxidoreductase subunit D [EC:7.1.1.2]	113	67	31	10	14	48	47	41	28	33	22	23	58	44	22	28	38	50	38	21	28	42	102	87	79	33	38	33	146	208	136	20	22	57	109	119	53	30	32	28	50	42	46	20	35	27	26	47	36
K23916 nitrogen fixation regulatory protein	0	0	0	0	0	0	0	0	0	0	0	0	0	0	0	0	0	0	0	0	0	0	0	0	0	0	0	0	0	0	0	0	0	0	0	0	0	0	0	0	0	0	0	0	0	0	0	0	0
K03444 MFS transporter, SP family, ERD6-like sugar transporter	4	0	2	0	0	5	1	0	1	1	0	4	3	0	0	0	15	0	3	0	4	3	0	3	0	0	2	0	4	5	1	0	0	1	0	0	0	1	1	0	0	4	3	0	1	1	1	1	0
K17222 L-cysteine S-thiosulfotransferase [EC:2.8.5.2]	51	13	4	0	1	0	35	21	1	7	0	0	41	31	4	5	0	0	14	7	5	14	1	1	97	14	4	0	9	0	72	9	0	1	0	0	13	19	3	4	0	7	5	0	1	0	7	1	8
K00643 5-aminolevulinate synthase [EC:2.3.1.37]	21	10	0	2	0	0	7	12	0	2	0	0	15	21	4	17	0	1	3	3	4	1	0	0	4	2	2	2	2	0	5	0	0	0	0	0	2	5	0	3	1	2	0	0	0	0	0	0	2
K07750 methylsterol monooxygenase [EC:1.14.18.9]	0	1	0	0	0	0	0	0	0	0	0	0	0	0	0	0	0	0	0	0	0	0	0	0	0	0	0	0	0	0	0	0	0	0	0	0	0	0	0	0	0	0	0	0	0	0	0	0	0
K13893 microcin C transport system substrate-binding protein	54	38	9	7	17	20	24	25	12	10	17	9	31	26	8	8	11	14	13	7	6	25	34	40	23	12	20	14	27	53	15	4	13	23	12	32	7	10	9	3	4	4	4	4	13	3	8	11	11
K19613 leucine-rich repeat protein SHOC2	0	2	0	0	4	0	0	0	0	0	0	0	0	0	0	0	0	0	0	0	0	0	0	0	0	1	0	0	0	0	0	0	0	0	0	0	0	0	1	0	0	0	0	0	0	0	0	0	0
K05692 actin beta/gamma 1	6	7	7	18	96	137	4	6	12	19	88	121	10	12	5	23	75	106	10	29	105	160	407	326	22	29	110	134	231	416	14	28	152	151	426	258	6	3	23	16	70	37	38	27	28	58	9	20	32
K05828 [amino group carrier protein]-L-2-aminoadipate 6-kinase [EC:2.7.2.17]	5	3	0	0	0	0	1	5	0	0	0	0	6	0	0	0	8	2	0	0	0	0	7	12	1	0	0	1	3	11	1	0	0	4	6	0	1	0	2	0	0	0	0	1	0	0	0	2	0
K00008 L-iditol 2-dehydrogenase [EC:1.1.1.14]	56	71	45	42	61	110	52	68	41	52	83	102	48	50	35	65	109	90	9	43	97	119	260	297	51	32	63	68	184	308	30	22	74	122	216	157	30	18	32	12	37	40	48	32	33	34	21	26	25
K12994 O-antigen biosynthesis alpha-1,3-mannosyltransferase [EC:2.4.1.349 2.4.1.-]	24	18	9	4	10	6	5	5	3	9	13	11	16	11	7	1	0	14	5	4	12	5	34	27	11	4	17	14	31	18	14	5	12	9	4	10	16	8	4	3	6	5	11	5	2	4	11	10	9
K02421 flagellar biosynthesis protein FliR	1	4	1	0	0	7	1	1	2	0	1	4	4	0	6	0	9	1	0	0	2	3	7	5	5	7	7	5	1	12	7	3	0	4	17	16	1	1	2	3	4	4	4	4	2	4	0	3	1
K17641 beta-xylosidase	0	0	2	0	0	0	1	0	0	0	1	0	0	0	0	0	0	0	0	0	5	0	2	3	1	2	0	0	0	9	0	0	2	0	0	0	0	0	0	1	0	0	0	0	1	2	0	0	1
K01788 N-acylglucosamine-6-phosphate 2-epimerase [EC:5.1.3.9]	1	0	0	0	0	0	0	0	0	0	0	0	0	1	3	0	0	0	0	0	0	4	0	0	0	0	0	1	0	0	1	2	0	0	0	0	0	0	1	0	0	0	0	2	0	2	0	0	0
K05521 ADP-ribosyl-[dinitrogen reductase] hydrolase [EC:3.2.2.24]	6	5	2	1	4	6	1	11	3	0	10	4	3	1	9	0	0	5	4	4	4	1	2	17	8	3	3	2	13	28	6	4	6	13	6	20	19	7	4	0	5	10	13	6	5	5	6	7	5
K01779 aspartate racemase [EC:5.1.1.13]	21	37	7	9	22	26	15	22	10	14	25	11	16	18	6	1	27	37	11	8	23	18	79	65	23	9	17	36	50	180	19	12	4	27	64	42	13	10	6	4	6	6	8	14	14	21	5	3	3
K24119 NADH-dependent peroxiredoxin subunit C [EC:1.11.1.26]	1	1	0	0	1	0	2	2	1	0	0	0	1	0	0	0	0	1	0	0	0	1	2	0	6	0	0	0	1	0	2	0	0	0	0	0	0	23	12	5	0	3	6	1	1	0	7	8	9
K19670 phosphonoacetate hydrolase [EC:3.11.1.2]	2	6	1	6	0	0	5	3	4	2	0	4	5	4	2	0	0	4	4	1	5	5	0	0	3	4	8	0	1	0	0	0	7	2	0	0	0	0	0	0	0	1	0	0	0	0	1	0	0
K19668 cellulose 1,4-beta-cellobiosidase [EC:3.2.1.91]	4	4	1	3	2	4	6	3	5	2	6	7	7	11	3	2	0	13	4	3	11	10	25	12	1	2	12	1	44	13	1	0	8	8	17	26	0	0	1	2	4	6	6	3	11	1	0	4	5
K19416 modulator of FtsH protease	139	64	23	7	11	5	81	64	25	17	11	8	78	47	39	6	0	9	44	21	38	35	29	13	149	28	31	20	29	45	108	38	18	8	7	0	174	123	62	4	2	19	24	3	2	2	71	34	69
K01382 cathepsin E [EC:3.4.23.34]	0	0	0	0	0	0	0	0	0	0	0	0	0	0	0	0	0	0	0	0	0	0	0	0	0	0	0	0	0	0	0	0	0	0	0	0	0	0	0	0	0	0	0	0	0	0	0	1	0
K14538 nuclear GTP-binding protein	0	0	0	0	0	0	0	0	2	0	0	0	0	0	0	0	0	0	0	1	0	0	0	0	0	0	0	1	0	0	0	0	0	0	0	0	0	1	0	0	0	1	0	0	0	0	0	0	0
K23549 uptake hydrogenase large subunit [EC:1.12.99.6]	4	0	3	6	0	0	0	1	0	0	0	0	1	2	3	0	0	5	0	0	0	0	0	0	5	0	1	0	0	8	0	0	0	0	0	0	1	0	2	3	5	3	8	3	2	2	1	2	2
K21837 zerumbone synthase [EC:1.1.1.326]	0	0	0	0	0	0	1	3	3	0	5	1	0	2	0	0	0	0	0	0	1	0	0	0	1	0	0	1	0	0	0	0	0	0	1	0	0	0	0	0	0	0	0	0	0	0	0	1	0
K01160 crossover junction endodeoxyribonuclease RusA [EC:3.1.21.10]	0	0	0	0	2	4	0	0	0	0	1	0	0	0	0	0	0	0	0	0	0	0	0	0	0	0	0	0	1	5	0	0	0	0	0	0	0	0	0	0	0	0	0	0	0	0	0	0	0
K03675 glutaredoxin 2	1	0	0	0	0	0	0	0	0	0	0	0	0	0	0	0	0	0	0	0	0	0	0	0	0	0	0	0	0	0	0	0	0	0	0	0	0	0	0	0	0	0	0	0	0	0	0	0	0
K00148 glutathione-independent formaldehyde dehydrogenase [EC:1.2.1.46]	16	3	1	0	0	1	1	3	0	0	0	0	9	2	0	0	0	0	0	0	0	2	0	0	1	0	1	0	0	0	0	0	0	4	0	0	0	1	1	0	1	0	1	0	1	0	2	1	0
K00860 adenylylsulfate kinase [EC:2.7.1.25]	51	64	17	12	20	16	32	41	24	12	25	30	41	46	14	13	2	11	25	25	17	15	35	26	18	9	22	25	51	29	28	24	11	12	44	32	30	14	8	8	13	8	14	5	10	8	18	12	12
K16692 tyrosine-protein kinase Etk/Wzc [EC:2.7.10.-]	4	1	3	0	1	3	5	3	4	0	3	0	1	4	1	1	4	4	5	0	9	3	25	15	3	0	8	3	4	25	2	0	6	8	17	12	1	3	4	1	3	3	3	3	5	2	4	4	2
K02167 TetR/AcrR family transcriptional regulator, transcriptional repressor of bet genes	8	2	0	0	0	0	0	1	0	1	0	0	0	3	0	0	0	1	1	0	0	0	0	0	1	0	1	0	0	0	0	0	0	0	0	0	0	0	0	0	0	0	0	0	1	1	0	0	1
K07679 two-component system, NarL family, sensor histidine kinase EvgS [EC:2.7.13.3]	6	6	5	0	3	3	6	5	5	3	11	1	3	7	5	2	0	0	13	0	4	1	0	4	4	3	0	3	5	2	16	5	1	3	11	13	21	8	4	1	2	2	3	3	4	0	15	5	10
K06992 uncharacterized protein	0	0	1	3	0	2	0	2	2	2	11	1	3	2	1	2	10	2	0	2	2	5	4	14	7	1	4	0	7	43	2	1	3	3	1	0	0	0	1	0	0	1	1	3	1	4	2	0	0
K08982 putative membrane protein	3	2	0	2	6	3	2	0	0	0	1	5	1	1	0	0	0	7	0	4	0	0	9	2	0	1	0	0	5	12	0	0	4	3	0	0	0	1	5	2	1	1	2	9	6	3	0	0	1
K16558 succinoglycan biosynthesis protein ExoL [EC:2.-.-.-]	0	0	0	0	0	0	0	0	0	0	0	0	0	0	0	0	0	0	0	0	0	0	0	0	1	0	0	0	0	0	0	0	0	0	0	0	0	0	0	0	0	0	0	0	1	0	0	0	0
K00154 coniferyl-aldehyde dehydrogenase [EC:1.2.1.68]	20	10	3	0	0	2	7	19	7	0	0	0	21	8	4	0	0	0	0	0	5	1	0	1	5	1	0	0	3	0	6	2	0	0	0	0	0	1	1	0	0	0	0	0	0	0	1	1	1
K00220 cyclohexadieny/prephenate dehydrogenase [EC:1.3.1.43 1.3.1.12]	4	9	0	0	3	10	6	3	0	0	2	2	7	5	1	8	0	6	4	0	3	0	14	10	0	3	2	2	5	13	3	0	3	3	11	0	1	1	2	1	1	2	0	0	1	0	2	1	1
K18114 dimethylallylcistransferase [EC:2.5.1.28]	0	0	0	0	1	0	0	0	0	0	0	0	0	0	0	0	0	0	0	0	0	0	0	0	0	0	0	0	0	0	0	0	0	0	0	0	0	0	0	0	0	0	0	0	0	0	0	0	0
K01624 fructose-bisphosphate aldolase, class II [EC:4.1.2.13]	121	160	79	116	111	118	105	109	121	72	136	123	150	160	101	53	136	119	128	94	131	177	338	293	188	92	107	102	313	358	280	78	73	164	282	219	348	124	107	63	147	77	92	91	73	79	176	119	87
K06336 spore coat-associated protein N	0	0	0	0	2	0	0	0	0	0	0	0	0	0	1	0	0	0	0	0	1	19	2	18	0	0	7	1	3	13	1	0	5	14	20	33	0	0	0	1	0	0	1	0	1	2	0	0	0
K06001 tryptophan synthase beta chain [EC:4.2.1.20]	105	144	90	101	210	218	85	107	137	135	202	223	76	115	115	94	143	215	83	96	203	289	1228	1156	151	109	214	247	841	2043	87	62	223	423	1271	1176	109	56	110	66	183	137	147	79	101	111	77	92	77
K03547 DNA repair protein SbcD/Mre11	18	24	12	10	5	32	12	7	11	14	4	16	12	11	13	6	6	18	13	5	36	26	68	75	13	6	13	30	52	94	16	5	21	33	86	67	16	9	8	4	18	10	9	18	8	12	6	14	10
K16044 scyllo-inositol 2-dehydrogenase (NADP+) [EC:1.1.1.371]	6	13	1	10	5	11	3	9	5	6	9	14	15	7	4	16	0	16	2	7	13	19	16	26	18	15	22	18	45	19	15	13	12	20	52	33	3	5	6	2	6	4	7	3	9	2	2	2	3
K14403 cleavage and polyadenylation specificity factor subunit 3 [EC:3.1.27.-]	0	0	0	0	0	0	0	0	0	0	0	0	1	0	0	0	0	0	0	0	0	0	0	0	0	0	0	0	0	0	0	0	0	0	0	0	0	0	0	0	0	0	0	0	0	0	0	0	0
K12214 intracellular multiplication protein IcmL	0	0	0	0	0	0	0	1	0	0	0	0	1	0	0	0	0	0	0	0	0	0	0	0	0	0	0	0	0	0	0	0	0	0	0	0	0	0	0	0	0	0	0	0	0	0	0	0	0
K18222 arylsulfatase E [EC:3.1.6.-]	20	8	6	10	5	6	6	7	7	7	6	19	13	8	5	2	34	2	6	2	9	7	12	30	1	2	5	3	17	11	2	2	7	7	30	27	1	6	2	2	4	4	4	0	7	10	0	3	2
K10747 DNA ligase 1 [EC:6.5.1.1 6.5.1.6 6.5.1.7]	5	7	4	4	27	43	4	10	3	9	54	49	4	5	8	10	44	34	8	9	13	31	83	78	7	1	22	21	53	104	11	2	22	35	94	67	1	2	2	6	10	5	13	2	10	14	3	5	4
K01856 muconate cycloisomerase [EC:5.5.1.1]	1	8	5	7	8	9	6	8	2	3	8	0	5	9	3	22	0	1	4	0	7	3	9	8	2	2	3	7	5	27	3	1	1	14	21	12	5	0	0	2	2	3	2	0	2	3	2	2	1
K19963 6-aminohexanoate-oligomer endohydrolase [EC:3.5.1.117]	1	0	0	0	2	0	0	10	0	1	0	0	1	0	0	0	0	3	0	0	3	0	8	8	0	0	0	0	3	1	0	0	3	0	0	0	0	0	0	1	3	0	0	1	0	0	0	0	0
K16171 fumarylacetoacetate (FAA) hydrolase [EC:3.7.1.2]	8	4	1	2	0	0	2	3	2	6	0	0	2	5	1	0	3	0	0	0	0	2	0	0	0	0	3	1	1	0	5	3	0	0	0	0	0	1	0	0	0	0	0	0	0	0	1	0	0
K03310 alanine or glycine:cation symporter, AGCS family	71	31	18	18	28	35	38	38	19	16	25	33	48	45	13	25	9	28	16	18	36	33	165	255	32	14	21	35	98	480	35	3	17	41	130	299	26	12	16	10	26	38	65	181	194	129	22	18	7
K12290 pilus assembly protein HofO	0	0	0	0	0	0	0	0	0	0	0	0	0	0	0	0	0	0	0	0	0	0	0	0	2	0	0	0	0	0	0	0	0	0	0	0	0	0	0	0	0	0	0	0	0	0	0	0	0
K09820 manganese/iron transport system ATP-binding protein	0	5	1	0	0	4	0	0	0	0	0	0	0	0	0	7	0	0	0	0	0	6	29	34	1	0	1	0	8	32	2	0	0	0	7	74	2	1	0	1	2	2	0	1	1	3	0	2	2
K17993 sulfhydrogenase subunit alpha [EC:1.12.1.3 1.12.1.5]	5	8	10	3	6	16	6	8	11	4	7	13	1	9	9	1	1	16	16	4	10	6	12	7	20	8	12	7	18	62	15	3	2	6	30	16	6	6	4	7	18	9	11	8	11	25	5	7	8
K02827 cytochrome aa3-600 menaquinol oxidase subunit I [EC:7.1.1.5]	0	0	0	0	0	0	0	0	0	0	0	0	0	0	0	0	0	0	0	0	0	0	0	0	0	0	0	0	0	0	0	0	0	0	0	0	0	0	0	0	0	0	0	0	0	0	0	0	0
K01708 galactarate dehydratase [EC:4.2.1.42]	4	2	2	1	2	6	1	1	4	0	4	3	0	2	0	0	0	4	0	1	7	1	15	12	3	3	5	0	18	22	0	0	3	3	21	10	1	0	1	0	1	0	2	0	1	1	0	3	0
K14411 RNA-binding protein Musashi	0	0	0	0	0	0	0	0	1	0	0	0	0	0	0	0	0	0	0	0	0	0	0	0	0	0	0	0	0	0	0	0	0	0	0	0	0	0	0	0	0	0	0	0	0	0	0	0	0
K04042 bifunctional UDP-N-acetylglucosamine pyrophosphorylase / glucosamine-1-phosphate N-acetyltransferase [EC:2.7.7.23 2.3.1.157]	49	20	17	23	40	62	26	24	20	11	56	58	24	29	21	7	70	54	9	13	18	40	177	153	19	9	28	32	68	263	28	10	35	47	161	89	23	10	18	9	29	11	28	25	29	35	10	25	30
K09922 uncharacterized protein	0	0	0	0	0	0	0	0	0	0	0	1	0	0	0	0	0	3	0	0	0	1	0	0	0	0	0	0	0	0	1	0	0	0	0	0	5	1	1	0	4	1	1	0	0	1	0	1	0
K01759 lactoylglutathione lyase [EC:4.4.1.5]	138	78	25	17	30	36	55	72	28	11	51	43	101	76	28	9	52	36	36	12	17	36	91	96	32	21	22	43	58	105	43	14	15	34	33	42	13	20	20	10	13	4	15	12	11	16	18	14	15
K13016 UDP-N-acetyl-2-amino-2-deoxyglucuronate dehydrogenase [EC:1.1.1.335]	3	7	0	3	5	5	3	1	1	11	4	2	6	12	4	6	19	3	9	6	2	7	8	3	4	9	1	3	4	1	3	8	0	4	5	17	5	5	5	2	3	3	3	1	4	1	5	9	4
K11782 chorismate dehydratase [EC:4.2.1.151]	6	4	0	8	0	0	4	1	0	1	0	0	2	0	0	0	0	3	4	2	0	7	0	0	4	0	0	3	0	0	2	0	0	0	5	0	1	1	2	0	0	0	2	1	1	0	2	1	2
K03973 phage shock protein C	37	24	23	19	52	82	21	17	12	38	67	88	17	13	22	22	92	59	36	26	26	46	39	37	48	34	23	17	39	64	26	14	19	29	21	78	15	41	49	17	26	26	30	30	28	19	18	21	26
K06186 outer membrane protein assembly factor BamE	7	4	2	0	0	1	1	3	0	1	0	1	5	5	4	0	0	5	6	5	3	1	13	1	4	3	1	0	0	2	3	0	1	0	0	0	6	2	2	1	1	2	4	0	0	1	2	0	1
K09874 aquaporin NIP	11	4	0	1	0	6	7	13	1	0	0	5	1	2	6	0	0	2	1	6	3	16	2	3	1	9	3	4	21	9	6	1	1	5	12	0	0	1	0	0	0	0	0	0	1	0	0	4	1
K03056 DNA-directed RNA polymerase subunit L [EC:2.7.7.6]	4	1	0	0	2	0	4	3	0	0	0	9	5	5	1	1	0	0	9	0	1	0	5	3	1	0	0	2	3	13	0	0	5	8	25	18	1	0	1	0	6	0	0	0	0	4	1	0	0
K01483 ureidoglycolate lyase [EC:4.3.2.3]	9	4	0	0	4	0	1	1	5	0	0	2	3	11	1	0	0	3	0	0	0	2	0	3	2	0	0	0	0	4	0	1	0	3	0	1	2	0	0	1	2	0	1	3	1	0	0	0	0
K05778 putative thiamine transport system permease protein	0	0	0	0	0	0	0	0	0	0	0	0	0	1	0	0	0	0	0	0	0	0	0	0	0	2	0	0	0	0	0	0	0	0	0	0	0	0	0	0	0	0	0	0	0	0	1	0	0
K01251 adenosylhomocysteinase [EC:3.3.1.1]	248	171	79	60	80	129	132	103	76	83	121	134	138	111	70	78	133	126	65	65	87	115	361	287	203	69	68	87	238	455	144	78	107	136	238	279	171	101	126	42	92	76	87	59	74	63	84	104	95
K25073 1'-hydroxy-gamma-carotene C-4' ketolase	0	0	0	0	0	0	0	0	0	0	0	0	0	0	0	0	0	0	0	0	0	0	0	0	0	0	0	0	0	0	0	0	0	0	0	0	0	2	0	0	0	0	0	0	0	0	0	1	2
K21060 D-hydroxyproline dehydrogenase [EC:1.5.99.-]	1	0	0	0	0	0	1	2	0	0	0	0	4	0	0	0	0	0	0	0	0	0	0	0	1	2	0	0	0	0	0	0	0	0	0	0	0	0	0	0	0	0	0	0	0	0	0	0	0
K18022 glyceraldehyde dehydrogenase small subunit [EC:1.2.99.8]	42	22	9	14	31	20	10	10	10	6	33	36	21	23	6	8	46	17	6	5	20	26	79	152	14	6	13	18	53	115	10	0	11	27	117	94	14	9	2	4	5	6	5	4	7	12	4	4	2
K18013 3-keto-5-aminohexanoate cleavage enzyme [EC:2.3.1.247]	43	51	26	38	38	55	31	42	37	29	48	88	32	40	27	23	73	53	32	25	54	102	180	154	61	18	64	57	97	261	23	19	55	77	217	228	17	15	15	5	48	27	39	31	32	52	18	17	16
K22736 vacuolar iron transporter family protein	1	0	1	3	0	1	1	3	0	0	1	0	0	2	0	0	0	0	2	0	2	3	10	7	2	1	0	0	0	9	2	0	2	1	0	26	2	1	5	1	0	0	1	0	0	0	1	1	3
K06929 uncharacterized protein	21	20	1	2	7	11	12	16	6	5	9	12	17	10	6	13	0	8	9	10	8	19	13	20	22	5	6	4	14	60	22	10	13	24	64	21	6	9	8	5	5	1	8	4	5	7	7	13	8
K02233 adenosylcobinamide-GDP ribazoletransferase [EC:2.7.8.26]	4	3	5	0	5	4	1	5	2	1	0	5	0	1	2	8	2	2	0	2	0	3	6	2	2	1	0	0	12	9	8	1	1	0	4	42	5	3	0	3	0	1	1	3	0	1	4	1	2
K16376 polyketide synthase FkbC	2	0	0	0	0	0	0	0	0	0	0	0	0	0	0	0	0	0	0	1	0	0	0	0	0	1	0	0	0	0	0	0	0	0	0	0	0	0	1	0	0	0	0	0	0	0	0	0	0
K13043 N-succinyl-L-ornithine transcarbamylase [EC:2.1.3.11]	1	1	0	0	0	5	0	1	0	0	0	0	1	0	1	0	0	0	0	1	0	2	11	2	0	0	0	0	1	0	0	2	0	1	7	0	1	0	2	0	1	0	0	0	0	0	0	0	1
K08978 bacterial/archaeal transporter family protein	1	2	0	0	0	0	1	1	0	0	0	0	1	1	0	0	0	0	0	3	1	0	6	4	2	1	2	0	1	3	0	0	3	0	0	26	1	0	0	0	2	2	1	1	0	0	1	3	0
K11130 H/ACA ribonucleoprotein complex subunit 3	0	0	0	0	2	4	0	0	0	0	0	0	0	0	0	0	0	2	2	2	2	4	7	2	1	0	0	0	2	6	0	0	7	0	9	0	1	1	1	0	2	0	6	1	0	3	1	1	1
K07237 tRNA 2-thiouridine synthesizing protein B	11	4	14	0	0	1	7	5	2	3	1	2	4	2	5	1	4	0	4	3	11	3	2	3	35	10	0	0	4	3	19	1	0	1	0	0	94	12	2	0	0	0	1	0	1	1	42	5	9
K21929 uracil-DNA glycosylase [EC:3.2.2.27]	40	26	6	18	18	35	14	12	20	17	29	55	29	28	7	15	17	26	16	20	44	37	128	93	32	6	30	38	71	116	5	13	15	23	105	93	10	9	21	6	22	10	12	13	20	14	16	15	17
K11333 3,8-divinyl chlorophyllide a/chlorophyllide a reductase subunit X [EC:1.3.7.14 1.3.7.15]	0	0	0	0	0	0	0	0	0	0	0	0	0	0	0	0	0	0	0	0	0	0	0	0	0	0	0	0	0	0	0	0	0	0	0	0	0	0	1	1	0	3	1	1	1	0	0	0	0
K07253 phenylpyruvate tautomerase [EC:5.3.2.1]	3	0	1	0	1	0	2	0	0	0	8	1	0	0	1	0	0	9	0	0	3	0	0	1	5	0	1	4	8	0	2	1	0	0	0	0	0	0	0	0	0	0	0	0	0	0	0	2	0
K02969 small subunit ribosomal protein S20e	1	3	0	1	0	0	2	1	0	0	0	0	0	1	0	0	0	0	0	0	0	0	0	0	0	0	0	0	0	0	0	0	0	0	0	0	0	0	0	0	0	0	0	0	0	0	0	0	0
K21676 lupanine 17-hydroxylase (cytochrome c) [EC:1.17.2.2]	0	0	0	0	0	0	0	0	0	0	0	0	0	0	0	0	0	0	0	0	0	0	0	0	0	0	0	0	0	0	0	0	0	0	0	0	0	0	0	0	0	0	0	0	0	0	0	0	0
K21493 toxin YxiD [EC:3.1.-.-]	0	0	0	0	0	0	0	0	0	0	0	0	0	0	0	0	0	4	0	0	0	0	0	0	0	0	0	0	0	0	0	0	0	0	0	0	0	0	0	0	0	0	0	0	0	0	0	0	0
K11954 neutral amino acid transport system substrate-binding protein	27	74	46	50	66	68	30	51	100	36	68	42	20	61	66	34	69	78	17	4	22	48	313	401	23	19	36	35	213	784	9	10	28	59	298	315	21	8	5	10	22	3	8	3	4	4	23	10	5
K09776 uncharacterized protein	0	0	0	0	0	0	0	0	0	0	0	0	0	1	0	0	0	0	0	1	3	0	0	0	0	2	0	0	0	2	1	0	0	1	0	0	0	2	2	0	0	0	0	4	0	4	0	0	0
K16290 xylem cysteine proteinase [EC:3.4.22.-]	0	0	0	0	0	0	0	0	0	0	0	0	0	0	0	0	0	0	0	0	0	0	0	0	0	0	0	0	0	0	0	0	0	0	0	0	0	0	0	0	0	0	0	0	0	0	0	0	0
K02955 small subunit ribosomal protein S14e	1	4	0	0	5	1	2	5	1	0	4	0	5	6	0	0	23	0	0	0	2	1	1	4	1	1	0	2	2	2	0	0	0	0	1	0	0	1	1	1	0	0	2	2	2	0	0	1	0
K05687 protein DJ-1 [EC:3.5.1.124]	0	0	0	0	0	0	0	1	0	0	0	0	0	1	1	4	0	0	0	3	1	1	0	0	0	2	0	2	1	0	3	1	1	0	0	0	25	7	2	0	0	0	2	0	0	1	8	2	2
K01029 3-oxoacid CoA-transferase subunit B [EC:2.8.3.5]	10	10	5	6	2	21	11	8	14	11	12	10	6	8	7	11	7	6	5	3	8	15	16	30	13	2	12	6	14	21	11	3	10	10	45	1	5	2	10	8	7	14	21	21	24	13	1	5	6
K18843 antitoxin HicB	4	2	1	0	2	4	9	1	0	2	5	1	2	4	2	0	14	8	4	2	4	10	19	8	5	0	3	3	5	14	6	0	2	1	11	0	10	5	4	4	4	1	3	2	2	3	8	7	10
K16509 regulatory protein spx	0	0	0	0	0	0	0	0	0	0	0	0	0	0	2	0	0	0	1	0	0	0	0	0	0	0	0	1	0	0	0	0	0	0	0	0	0	1	0	0	0	1	0	0	4	3	0	0	1
K01069 hydroxyacylglutathione hydrolase [EC:3.1.2.6]	128	107	39	46	46	55	99	77	40	40	69	80	84	72	58	19	61	52	87	73	101	90	199	169	228	97	101	55	207	182	177	78	68	69	161	200	175	143	185	53	45	39	52	28	45	61	105	103	72
K04021 aldehyde dehydrogenase	19	22	9	0	10	13	13	6	1	4	4	8	9	7	2	11	16	4	1	1	2	16	21	3	2	3	14	6	8	65	15	9	8	12	12	2	20	3	12	3	10	2	9	14	6	6	5	9	4
K02757 beta-glucoside PTS system EIICBA component [EC:2.7.1.-]	2	0	0	0	0	0	0	0	0	0	0	0	0	0	0	0	0	0	0	0	0	0	0	0	0	0	0	0	0	0	0	0	0	0	0	0	0	0	0	0	0	0	0	0	0	0	0	0	0
K11175 phosphoribosylglycinamide formyltransferase 1 [EC:2.1.2.2]	8	10	17	10	18	26	11	16	11	8	16	19	11	13	14	11	40	21	12	11	20	18	38	61	23	9	11	10	41	129	21	8	26	20	59	90	16	9	9	8	18	6	6	6	15	21	11	12	16
K04099 gallate dioxygenase [EC:1.13.11.57]	0	0	0	0	0	0	2	0	0	0	0	0	0	0	0	0	0	0	0	0	0	0	0	0	0	0	0	0	0	0	0	0	0	0	0	0	0	0	0	0	0	0	0	0	0	0	0	0	0
K02160 acetyl-CoA carboxylase biotin carboxyl carrier protein	26	28	9	13	10	15	16	31	12	5	31	30	15	20	12	8	20	8	5	10	13	16	27	59	31	8	19	15	43	103	15	6	10	18	71	68	18	13	17	4	12	28	18	12	8	15	10	18	16
K09800 translocation and assembly module TamB	2	2	0	3	2	1	1	1	5	1	1	0	0	1	2	7	0	1	6	1	3	3	0	11	4	6	0	4	15	6	3	0	3	2	0	5	13	8	30	31	60	46	85	80	65	4	13	14	37
K02815 sorbose PTS system EIID component	0	0	0	0	0	0	0	0	0	0	0	0	0	0	0	0	0	0	0	0	0	0	0	0	0	0	0	0	0	0	0	0	0	0	0	0	0	0	0	0	0	0	0	0	0	0	0	0	0
K18974 dihydropteroate synthase type 1 [EC:2.5.1.15]	0	0	0	0	0	0	0	0	0	0	0	0	0	0	0	0	0	0	0	0	0	0	0	0	0	0	0	0	0	0	0	0	0	0	0	0	0	0	0	0	0	0	0	0	0	0	0	0	0
K05927 quinone-reactive Ni/Fe-hydrogenase small subunit [EC:1.12.5.1]	2	6	2	11	6	14	0	3	14	13	6	2	1	7	1	0	1	4	22	3	10	33	17	14	26	13	18	11	74	16	28	4	22	15	33	13	18	2	16	1	7	3	1	0	1	2	5	12	5
K04797 prefoldin alpha subunit	1	1	1	0	2	6	0	0	1	0	7	15	1	1	0	0	0	9	0	2	0	3	5	22	1	0	0	1	16	8	0	0	0	8	11	2	0	0	0	0	5	5	3	7	2	1	0	1	2
K00072 sepiapterin reductase [EC:1.1.1.153]	0	0	0	0	0	0	0	0	0	0	0	0	0	0	0	0	0	0	0	0	0	0	0	0	0	0	0	0	0	0	0	0	0	0	0	0	0	0	0	0	0	0	0	0	0	0	0	0	0
K15514 3,4-dehydroadipyl-CoA semialdehyde dehydrogenase [EC:1.2.1.77]	4	0	0	0	0	0	1	0	0	0	0	0	0	0	0	0	0	0	0	0	0	0	0	0	0	0	0	0	0	0	0	0	0	0	0	0	0	0	0	0	0	0	0	0	0	0	0	0	0
K03328 polysaccharide transporter, PST family	2	3	3	4	0	2	1	1	5	6	9	4	1	10	5	0	0	5	1	5	2	1	11	10	15	0	6	3	12	23	2	0	8	6	22	15	3	5	1	2	6	5	4	3	2	5	2	4	3
K07471 probable transcriptional regulator	0	0	0	0	0	0	0	0	0	0	0	0	0	0	0	0	0	0	0	0	0	0	0	0	0	0	0	0	0	0	0	0	0	0	0	0	0	0	0	0	0	0	0	0	0	0	0	0	0
K03199 type IV secretion system protein VirB4 [EC:7.4.2.8]	0	0	0	0	0	0	0	0	0	0	0	0	0	0	0	0	0	0	0	0	0	1	0	0	0	0	0	0	0	0	0	0	0	0	0	0	0	0	0	0	0	0	0	0	0	0	0	0	1
K07023 5'-deoxynucleotidase [EC:3.1.3.89]	6	15	3	0	2	9	3	7	6	1	12	4	9	8	9	0	8	9	8	5	4	13	16	10	2	1	9	12	9	15	7	3	11	8	6	4	5	2	1	3	2	4	5	3	5	2	5	2	1
K03623 ribonuclease inhibitor	0	0	0	0	0	0	0	0	0	0	0	0	0	0	0	0	0	0	0	0	0	0	0	0	0	0	0	0	0	0	0	0	0	0	0	0	0	0	0	0	0	0	0	0	0	0	1	0	0
K20483 lantibiotic biosynthesis protein	1	0	0	0	0	5	0	0	0	0	2	3	0	0	0	0	0	3	2	0	0	0	2	0	0	0	2	1	4	0	0	0	0	0	17	17	0	0	0	0	0	0	1	1	0	0	0	0	0
K05378 phycoerythrin-associated linker protein	1	0	0	0	0	0	1	3	0	0	0	0	2	0	0	0	0	0	5	0	0	2	0	0	5	6	0	0	0	0	6	0	0	0	0	0	28	2	3	1	0	2	0	0	0	0	6	6	1
K00667 fatty acid synthase subunit alpha, fungi type [EC:2.3.1.86]	5	0	0	0	0	0	0	0	0	0	0	0	0	0	0	0	0	0	0	0	0	0	0	0	0	0	0	0	0	0	0	0	0	0	0	0	0	0	0	0	0	0	1	0	0	0	0	0	0
K22408 N,N'-diacetylchitobiose non-reducing end deacetylase [EC:3.5.1.136]	0	0	0	0	0	0	0	0	0	0	0	0	0	0	0	0	0	0	0	0	0	0	0	0	0	0	0	0	0	0	0	0	0	0	0	0	1	0	0	0	0	0	0	0	0	1	0	0	0
K21552 methyl halide transferase [EC:2.1.1.165]	3	0	0	0	1	0	1	2	1	0	0	3	0	2	0	0	0	1	1	0	1	0	4	0	2	0	0	0	0	4	1	0	0	0	0	0	0	0	3	2	0	0	0	0	0	0	0	5	0
K16845 (2R)-sulfolactate sulfo-lyase subunit alpha [EC:4.4.1.24]	5	4	1	1	0	1	0	4	1	1	0	3	5	7	1	0	0	3	5	4	8	4	12	1	6	2	1	1	6	6	11	3	4	1	0	67	7	1	0	2	1	1	1	1	0	0	0	2	1
K19820 nicotine dehydrogenase subunit C [EC:1.5.99.4]	0	1	0	0	0	0	0	0	0	0	0	0	1	0	0	0	0	0	0	2	0	0	4	0	0	0	0	0	0	0	0	0	0	0	0	0	0	0	0	0	0	0	0	0	0	0	1	0	0
K03790 [ribosomal protein S5]-alanine N-acetyltransferase [EC:2.3.1.267]	32	16	10	1	12	20	9	18	11	6	8	14	8	16	3	8	2	13	3	9	13	10	38	35	12	10	12	15	29	51	11	2	7	22	22	25	9	10	7	3	11	7	7	6	10	14	6	10	9
K24083 abhydrolase domain-containing protein 13 [EC:3.-.-.-]	0	1	0	0	2	0	0	0	0	0	0	0	0	0	0	0	0	0	0	0	0	0	0	0	0	0	0	0	0	0	0	0	0	0	0	0	0	0	0	0	0	0	0	0	0	0	0	0	0
K01089 imidazoleglycerol-phosphate dehydratase / histidinol-phosphatase [EC:4.2.1.19 3.1.3.15]	2	10	1	1	0	0	0	2	4	0	0	0	1	6	0	0	0	0	0	0	0	7	9	9	1	0	0	0	6	11	2	0	11	3	5	0	2	0	2	2	0	2	2	2	2	0	0	2	1
K09133 uncharacterized protein	2	2	0	1	4	8	5	1	5	1	8	12	1	1	1	3	26	3	1	0	4	4	22	11	4	2	5	4	23	24	0	0	5	12	17	12	2	2	5	2	2	1	8	0	2	8	4	2	0
K18982 D-galactarolactone isomerase [EC:5.4.1.4]	3	3	0	0	1	0	0	0	1	0	0	0	0	1	0	0	0	0	2	0	1	5	3	0	0	0	0	0	1	0	0	0	0	0	0	0	0	0	0	0	0	0	0	0	0	0	0	0	0
K16134 microcystin synthetase protein McyJ	0	0	0	0	0	0	0	0	0	0	0	0	0	0	0	0	0	0	0	0	0	0	0	0	0	0	0	0	0	0	0	0	0	0	0	0	1	0	0	0	0	0	0	0	0	0	0	0	0
K11018 thermolabile hemolysin	0	0	0	0	0	0	0	0	0	0	0	0	0	1	0	0	0	0	0	0	0	0	0	0	0	0	0	0	0	0	0	0	4	0	0	0	1	0	0	1	0	0	1	0	0	0	0	0	0
K18682 ribonucrease Y [EC:3.1.-.-]	79	112	78	67	155	145	51	69	66	47	114	134	88	78	69	30	99	123	55	39	83	93	415	401	84	37	86	74	218	550	92	37	64	166	363	243	64	52	70	25	102	61	78	67	63	77	45	48	45
K01296 carboxypeptidase M [EC:3.4.17.12]	0	0	1	0	0	0	0	0	0	0	1	2	0	0	0	0	0	4	0	0	0	2	10	0	0	0	0	0	0	0	0	0	0	2	0	0	0	0	0	0	0	1	0	0	0	0	0	0	0
K18446 triphosphatase [EC:3.6.1.25]	0	0	0	0	0	0	0	0	0	0	0	0	0	0	0	0	0	0	0	0	0	0	0	0	0	0	0	0	0	0	0	0	0	0	0	0	21	2	1	0	0	0	0	0	0	0	8	3	0
K09703 uncharacterized protein	16	6	1	4	11	23	2	0	8	12	7	21	2	9	1	3	5	15	4	3	10	10	116	85	3	4	10	11	58	150	0	2	6	22	76	121	0	2	5	0	4	4	4	6	10	7	1	2	2
K18369 alcohol dehydrogenase [EC:1.1.1.-]	15	8	5	5	6	3	9	8	4	6	3	12	8	3	3	5	7	10	6	8	11	15	11	33	4	4	7	8	22	21	2	7	2	22	10	51	2	6	0	1	6	1	5	2	1	6	0	5	4
K05710 3-phenylpropionate/trans-cinnamate dioxygenase ferredoxin component	10	3	0	0	1	4	4	2	0	1	2	2	6	5	0	0	25	3	4	5	3	0	0	2	2	2	1	0	1	0	1	4	10	6	8	6	0	2	3	1	3	2	3	1	0	0	0	7	3
K02058 simple sugar transport system substrate-binding protein	226	252	145	116	170	237	132	165	130	107	166	258	173	166	157	96	219	203	186	125	230	270	680	1025	207	171	162	268	509	2038	206	161	142	203	618	1010	187	123	117	107	156	145	233	444	587	429	136	205	102
K03326 C4-dicarboxylate transporter, DcuC family	0	0	0	0	0	0	0	0	0	0	0	0	0	0	0	0	0	0	0	0	0	0	0	0	0	0	0	0	0	0	0	1	0	0	0	0	0	0	0	0	0	0	0	0	0	0	0	0	0
K21279 3-deoxy-D-glycero-D-galacto-nononate 9-phosphate synthase [EC:2.5.1.132]	0	0	0	0	0	0	0	0	3	0	0	0	0	0	0	0	0	0	0	0	3	0	0	0	0	2	0	0	0	0	0	0	0	1	0	0	0	0	0	0	0	0	0	0	0	0	0	0	0
K18201 hydroxylysine kinase [EC:2.7.1.81]	0	0	1	0	0	0	0	0	0	0	0	0	0	1	0	0	0	0	0	0	0	0	0	5	0	0	0	0	0	0	0	0	0	0	0	0	0	0	0	0	0	0	0	0	0	0	0	0	1
K19342 copper chaperone NosL	17	18	7	5	3	3	1	6	5	9	7	6	8	6	17	3	8	5	4	2	3	8	8	0	17	4	6	1	11	0	9	2	3	1	1	10	8	4	8	1	0	1	1	0	1	0	10	5	7
K03492 GntR family transcriptional regulator, regulator of glucomannan utilization	0	0	0	0	0	0	0	0	0	1	0	0	0	0	1	0	0	0	0	0	0	0	0	0	0	0	0	2	0	0	0	0	0	0	0	0	0	0	0	0	0	0	0	0	0	0	0	0	0
K11749 regulator of sigma E protease [EC:3.4.24.-]	61	38	26	27	40	52	24	47	29	26	38	40	51	29	17	6	23	35	14	24	22	47	71	128	32	27	21	22	112	185	51	20	23	43	135	58	48	45	48	23	37	38	33	13	20	33	31	25	43
K05605 3-hydroxyisobutyryl-CoA hydrolase [EC:3.1.2.4]	1	0	0	0	0	0	2	3	3	0	0	0	0	0	1	0	0	0	0	0	2	1	0	0	0	0	0	1	5	0	0	0	3	0	0	0	0	0	0	0	0	0	0	0	0	0	0	0	0
K01845 glutamate-1-semialdehyde 2,1-aminomutase [EC:5.4.3.8]	122	125	78	53	121	150	76	97	84	68	108	131	110	132	96	31	91	121	62	46	72	122	281	300	98	54	80	82	277	348	107	28	71	89	222	184	73	32	60	27	65	43	48	34	43	64	39	61	35
K11181 dissimilatory sulfite reductase beta subunit [EC:1.8.99.5]	60	97	102	120	132	113	61	115	146	113	130	91	51	130	132	76	146	140	267	141	175	166	269	172	372	161	136	121	284	291	396	84	108	103	237	169	588	182	140	74	207	52	39	15	16	14	310	183	145
K01973 RNA-editing ligase [EC:6.5.1.3]	0	0	0	0	0	1	0	0	0	0	0	0	0	0	0	0	0	0	0	0	0	0	0	0	0	0	0	0	0	0	0	0	0	0	0	0	0	0	0	0	0	0	0	0	0	0	0	0	0
K03722 ATP-dependent DNA helicase DinG [EC:5.6.2.3]	32	30	21	7	23	13	12	17	18	11	13	13	13	19	19	21	1	5	6	13	16	24	35	37	11	5	8	13	22	75	10	4	31	19	28	25	10	4	9	2	12	9	15	5	10	10	7	10	6
K07466 replication factor A1	18	7	6	19	27	168	8	8	15	13	50	122	11	10	16	22	123	101	5	12	36	55	179	164	23	9	47	39	116	299	9	4	17	55	232	238	8	13	16	16	92	45	35	33	42	68	3	18	23
K01602 ribulose-bisphosphate carboxylase small chain [EC:4.1.1.39]	14	8	13	8	0	0	3	9	7	2	0	0	10	18	4	0	0	0	6	4	7	5	12	0	58	11	8	1	7	2	18	3	3	0	0	0	17	16	7	1	1	4	4	0	0	0	4	6	7
K01478 arginine deiminase [EC:3.5.3.6]	12	21	13	11	9	7	18	24	25	4	18	6	13	20	14	34	1	1	0	9	7	1	3	0	0	8	1	5	7	15	15	4	1	1	0	25	4	9	8	4	3	1	1	5	1	1	9	7	3
K07316 adenine-specific DNA-methyltransferase [EC:2.1.1.72]	26	26	15	11	22	36	20	19	6	7	33	19	16	20	17	13	15	31	6	14	24	44	100	107	13	22	26	33	64	213	24	8	39	59	111	91	46	24	21	19	39	25	40	33	47	49	27	30	21
K18539 thienamycin biosynthesis protein ThnO	0	0	0	0	0	0	0	0	0	0	0	0	0	0	0	0	0	0	0	0	0	0	0	0	0	0	0	0	0	0	0	0	0	0	0	0	0	0	0	0	0	0	0	0	0	0	0	0	0
K15745 phytoene desaturase (3,4-didehydrolycopene-forming) [EC:1.3.99.30]	0	0	1	1	0	2	0	1	2	0	1	1	1	0	1	0	0	0	0	0	4	2	6	0	2	0	0	3	11	1	0	0	3	0	0	1	1	0	0	2	2	0	2	0	0	0	0	0	0
K00059 3-oxoacyl-[acyl-carrier protein] reductase [EC:1.1.1.100]	413	360	211	150	285	290	257	327	210	149	283	282	284	344	166	108	256	296	205	157	229	308	937	969	285	166	260	340	800	1348	249	121	284	421	811	713	176	130	156	94	210	95	149	121	115	116	107	153	122
K24120 mycoredoxin-dependent peroxiredoxin [EC:1.11.1.29]	0	0	0	0	0	0	0	0	0	0	0	0	0	0	0	0	0	0	0	0	0	0	0	0	0	0	0	0	0	0	0	0	0	0	0	0	1	0	0	0	0	0	0	0	0	0	0	0	0
K03828 putative acetyltransferase [EC:2.3.1.-]	1	1	3	0	0	3	6	4	2	0	0	3	2	1	2	5	5	1	2	2	0	4	7	10	1	3	5	1	4	0	1	0	1	2	0	0	0	1	1	0	0	2	1	1	1	0	0	2	0
K03679 exosome complex component RRP4	6	5	5	2	41	69	8	9	5	3	44	48	5	3	4	9	33	84	0	6	22	19	70	82	12	2	17	9	43	147	6	6	8	29	86	40	6	2	8	5	22	15	16	8	9	23	6	2	12
K05997 Fe-S cluster assembly protein SufA	2	2	0	0	0	0	0	0	0	0	0	0	0	0	0	0	0	0	0	0	0	0	0	0	0	0	0	0	0	0	0	0	0	0	0	0	0	0	0	0	0	0	1	0	0	0	0	0	0
K20444 O-antigen biosynthesis protein [EC:2.4.1.-]	18	16	8	7	11	16	5	20	8	15	3	18	21	17	19	17	11	23	10	8	8	18	30	30	17	7	15	9	32	20	22	15	6	12	7	6	67	14	8	4	4	12	9	3	4	6	32	25	16
K12309 beta-galactosidase [EC:3.2.1.23]	0	0	0	0	0	0	0	0	0	0	0	0	0	0	0	0	0	0	0	0	1	0	0	0	0	0	0	0	0	0	0	0	0	0	4	0	0	0	0	0	0	0	0	0	0	0	0	0	0
K07300 Ca2+:H+ antiporter	9	2	3	3	0	5	3	2	0	0	2	0	5	1	2	0	0	3	2	2	1	2	6	5	1	0	1	3	9	4	2	0	0	6	4	4	5	4	2	1	4	2	2	0	1	0	1	2	3
K06602 flagellar biosynthesis activator protein FlaF	1	0	0	0	2	6	4	1	2	0	0	0	2	2	2	0	0	1	1	2	2	0	1	2	3	0	0	1	2	0	14	1	2	0	0	0	15	3	0	0	2	0	1	0	0	2	1	0	3
K17837 metallo-beta-lactamase class B [EC:3.5.2.6]	3	1	1	1	1	0	2	1	1	0	0	0	1	0	0	0	0	0	1	0	1	1	8	7	4	3	2	7	9	19	2	1	5	4	5	0	0	2	1	1	7	2	1	1	2	0	0	0	0
K08721 outer membrane protein, multidrug efflux system	0	0	0	0	0	0	0	0	0	0	0	0	1	0	0	0	0	0	0	0	0	0	0	0	0	0	0	0	0	0	0	0	0	0	0	0	0	0	0	0	0	0	0	0	0	0	1	0	0
K23271 erythritol/L-threitol dehydrogenase [EC:1.1.1.-]	0	0	0	0	0	2	0	2	0	0	0	0	0	0	0	0	0	0	0	0	0	0	0	3	0	0	0	0	0	0	0	0	0	0	0	0	0	0	0	0	1	0	0	3	4	0	1	0	0
K13485 2-oxo-4-hydroxy-4-carboxy-5-ureidoimidazoline decarboxylase [EC:4.1.1.97]	0	1	0	0	0	0	0	0	0	0	0	0	0	0	1	0	0	0	0	0	0	0	0	0	0	0	0	0	0	0	0	0	0	0	0	0	0	0	0	0	0	0	0	0	0	0	0	0	0
K07035 uncharacterized protein	0	0	0	0	0	0	0	0	0	0	0	0	0	0	0	0	0	7	0	0	0	0	0	0	0	0	0	0	0	0	0	0	0	0	0	0	0	0	0	0	0	0	0	0	0	0	0	0	0
K02490 two-component system, response regulator, stage 0 sporulation protein F	42	32	21	20	26	37	20	49	22	28	31	62	19	31	31	12	30	58	52	41	54	46	87	136	45	24	50	57	140	192	59	25	64	39	140	49	35	40	31	24	48	22	18	20	21	20	30	28	30
K09578 peptidyl-prolyl cis-trans isomerase NIMA-interacting 1 [EC:5.2.1.8]	0	1	0	2	2	0	1	0	0	0	0	0	0	0	0	0	0	4	0	0	0	0	1	0	0	3	0	1	0	0	0	0	0	3	5	0	0	0	0	0	0	0	0	0	0	0	0	0	1
K11443 two-component system, cell cycle response regulator DivK	50	45	25	11	23	38	28	46	23	25	20	36	34	30	33	20	35	39	15	33	18	35	60	85	49	22	54	29	82	99	35	18	33	47	77	56	27	13	16	9	13	15	12	14	10	16	15	20	12
K07550 benzoylsuccinyl-CoA thiolase BbsB subunit [EC:2.3.1.-]	6	11	7	3	21	7	8	5	14	5	10	9	11	8	5	17	2	10	9	4	13	6	52	41	1	4	11	9	28	56	4	10	12	16	55	3	6	4	3	0	6	1	4	2	4	7	2	5	7
K03100 signal peptidase I [EC:3.4.21.89]	55	45	26	22	67	35	36	37	39	31	52	44	42	71	39	25	59	44	43	19	28	45	156	182	50	38	24	28	122	183	53	9	41	70	128	92	85	33	29	23	38	28	24	35	25	47	63	33	35
K01014 aryl sulfotransferase [EC:2.8.2.1]	12	9	0	0	4	0	6	1	0	0	0	2	5	4	0	0	0	0	0	0	0	2	0	0	2	0	2	0	2	0	3	1	0	0	0	0	2	0	0	0	0	0	0	0	0	0	0	0	0
K09645 vitellogenic carboxypeptidase-like protein [EC:3.4.16.-]	0	0	0	0	3	1	0	0	0	0	1	5	0	0	0	0	0	2	0	0	0	0	5	4	0	0	0	0	0	0	0	0	0	1	0	0	0	0	0	0	1	1	0	0	0	0	0	0	0
K21253 glutathione S-transferase fosA [EC:2.5.1.18]	0	0	0	0	0	0	0	0	0	0	0	0	0	0	0	0	0	0	0	0	0	0	0	0	0	0	0	0	0	0	0	0	0	0	0	0	0	0	0	0	0	0	0	0	0	0	0	0	0
K10133 tumor protein p53-inducible protein 3 [EC:1.-.-.-]	6	2	4	1	6	9	2	6	0	1	0	2	3	5	3	7	0	7	0	4	8	9	3	16	8	0	7	7	2	12	4	0	7	13	7	5	1	0	1	1	3	0	1	4	1	3	3	3	0
K18202 5-phosphonooxy-L-lysine phospho-lyase [EC:4.2.3.134]	0	0	1	1	0	0	0	0	1	0	1	0	1	1	0	0	0	0	2	0	0	3	0	0	1	0	0	0	0	0	0	0	0	0	3	0	1	0	0	0	0	0	0	0	0	0	0	1	0
K09983 uncharacterized protein	3	0	0	0	0	0	0	0	0	2	0	0	4	0	0	0	0	0	0	0	0	0	0	3	0	0	0	0	0	0	2	0	0	0	0	0	1	2	0	0	3	1	0	0	0	0	0	0	1
K02860 16S rRNA processing protein RimM	49	37	11	15	16	24	37	33	12	3	57	15	49	28	22	16	13	22	33	16	20	16	62	57	54	26	24	19	59	113	41	6	23	14	26	30	62	26	24	12	19	21	25	23	12	12	40	16	14
K01246 DNA-3-methyladenine glycosylase I [EC:3.2.2.20]	27	13	13	5	10	16	15	18	12	10	9	4	24	15	20	4	34	16	5	13	6	10	34	36	22	6	12	5	20	25	13	6	4	2	57	8	3	7	7	2	5	3	6	4	5	3	3	2	3
K21727 4-nitrophenol 2-monooxygenase / 4-nitrocatechol 4-monooxygenase, reductase component	1	0	0	0	0	0	0	0	2	0	0	0	0	0	0	0	0	0	2	0	0	0	0	0	0	0	0	0	0	0	0	0	3	0	0	0	0	0	0	0	0	0	0	0	0	0	0	0	0
K21573 TonB-dependent starch-binding outer membrane protein SusC	500	446	265	180	110	155	383	369	322	159	146	154	452	550	245	175	162	251	185	147	182	222	638	882	277	121	144	146	563	1306	222	115	157	181	645	913	183	185	194	84	174	133	158	173	155	125	138	191	154
K19329 WW domain-containing oxidoreductase	2	0	0	0	0	0	3	3	0	0	0	0	0	8	0	0	0	0	0	1	0	0	0	0	7	2	0	1	2	6	2	0	1	5	0	0	2	0	0	1	0	0	0	0	0	2	0	0	1
K15724 iron-sulfur cluster insertion protein	92	45	16	11	4	1	41	28	19	9	14	6	55	31	29	5	0	11	23	11	53	24	23	3	61	24	33	23	18	30	56	21	23	26	3	0	20	39	46	14	9	15	20	6	2	0	25	24	41
K22982 hydroxypyruvate reductase [EC:1.1.1.81]	0	0	0	1	0	0	0	0	0	0	0	0	0	0	0	0	2	0	0	0	0	4	0	0	0	0	0	0	0	0	0	0	0	0	0	0	0	0	0	0	0	0	0	3	0	1	0	4	0
K19853 TDP-4-oxo-6-deoxy-alpha-D-glucose-3,4-oxoisomerase [EC:5.3.2.4]	0	0	0	1	0	0	0	0	0	1	0	0	1	0	1	0	0	0	3	1	0	0	5	3	2	1	0	0	1	0	0	0	0	1	0	0	3	0	0	0	0	0	0	1	0	0	1	0	0
K20744 mycolysin [EC:3.4.24.31]	0	0	0	0	0	0	0	0	0	0	0	0	0	0	0	0	0	0	0	0	0	0	0	0	0	0	0	0	0	0	0	0	0	0	0	0	0	0	0	0	0	0	0	0	0	0	0	0	0
K02341 DNA polymerase III subunit delta' [EC:2.7.7.7]	8	12	8	4	13	23	15	17	17	10	14	24	17	18	14	8	0	13	19	8	10	26	50	76	14	10	23	14	55	141	23	4	14	17	58	114	30	17	11	9	14	15	5	12	14	11	24	11	15
K19373 DnaJ homolog subfamily C member 28	0	0	1	0	0	0	1	0	0	0	0	0	0	0	0	0	0	0	0	0	0	0	0	0	0	0	0	0	2	0	2	0	0	0	0	0	0	0	0	0	0	0	0	0	0	0	0	0	0
K07720 two-component system, response regulator YesN	1	1	0	2	2	1	2	0	0	0	2	1	0	2	0	0	0	2	0	5	4	1	10	21	0	2	2	3	1	7	6	2	0	4	12	29	0	2	1	1	1	3	1	0	1	0	0	8	2
K00052 3-isopropylmalate dehydrogenase [EC:1.1.1.85]	56	86	35	35	54	42	47	61	61	36	47	46	68	71	60	8	42	63	28	44	51	76	172	152	64	37	48	39	160	241	90	21	43	71	182	103	61	34	32	15	38	32	34	26	32	52	33	39	33
K08975 putative membrane protein	2	2	1	2	19	36	3	0	1	15	34	42	2	6	0	0	33	42	5	8	6	30	47	87	7	3	25	14	33	117	1	0	13	37	81	44	0	0	2	0	20	10	23	13	16	24	3	2	2
K22086 methylglutamate dehydrogenase subunit C [EC:1.5.99.5]	6	1	0	2	1	0	2	4	2	4	1	0	4	0	2	3	0	2	0	2	2	2	1	0	1	2	2	3	4	0	4	0	0	1	0	0	1	1	0	0	0	0	0	0	0	0	0	2	0
K01130 arylsulfatase [EC:3.1.6.1]	1156	792	474	326	528	592	604	692	462	333	504	447	1094	838	521	352	365	550	215	178	345	424	788	466	383	236	263	351	1027	808	271	173	206	287	607	371	137	173	188	72	113	82	115	53	60	100	118	201	152
K15987 K(+)-stimulated pyrophosphate-energized sodium pump [EC:7.1.3.2]	249	252	207	171	311	361	182	194	241	281	329	330	147	253	239	248	288	414	414	287	410	447	791	660	578	333	382	369	790	1066	626	232	274	483	831	593	778	330	357	175	333	235	208	219	195	165	501	367	263
K23393 lipid II isoglutaminyl synthase (glutamine-hydrolysing) [EC:6.3.5.13]	0	0	0	0	0	0	0	0	0	0	0	0	0	0	0	0	0	0	0	0	0	0	0	0	0	0	0	0	0	0	0	0	0	0	0	0	0	0	1	0	0	0	0	0	0	0	0	0	1
K17219 sulfur reductase molybdopterin subunit	0	1	0	0	0	0	3	1	1	0	0	3	0	0	4	0	0	0	0	0	0	2	0	0	10	0	0	0	7	0	0	0	0	0	0	0	411	46	5	1	3	1	4	0	0	1	192	33	34
K16135 LysR family transcriptional regulator, transcriptional activator for dmlA	1	0	0	0	0	0	2	1	0	2	0	0	0	0	0	0	0	0	0	0	0	1	0	0	0	1	0	0	0	1	0	0	0	0	0	0	1	0	0	0	2	0	0	0	0	0	0	0	1
K00005 glycerol dehydrogenase [EC:1.1.1.6]	3	6	12	15	34	12	10	17	14	12	23	12	5	13	21	9	22	19	7	7	11	9	9	64	13	13	7	13	6	54	7	2	8	7	38	33	4	7	7	3	3	1	15	14	11	10	9	5	3
K08602 oligoendopeptidase F [EC:3.4.24.-]	75	34	22	17	35	59	37	31	28	18	44	79	54	89	32	9	15	60	23	28	42	68	288	181	31	21	41	68	138	322	44	11	31	86	266	191	23	20	37	26	37	21	39	27	30	37	26	24	23
K01471 6-aminohexanoate-cyclic-dimer hydrolase [EC:3.5.2.12]	2	0	0	0	0	0	0	0	0	0	0	0	1	0	1	0	0	0	0	0	0	0	0	0	0	0	0	0	0	0	0	0	0	0	0	0	0	0	0	0	0	0	0	0	0	0	0	0	0
K19168 toxin CptA	4	4	0	0	0	9	2	2	2	1	0	5	1	1	1	0	0	1	3	2	1	3	3	0	3	0	1	4	3	16	5	0	1	3	1	3	0	0	1	1	2	0	3	1	1	4	0	1	3
K19304 murein DD-endopeptidase [EC:3.4.24.-]	15	14	3	0	4	10	8	10	5	5	3	3	26	6	6	1	18	10	5	1	13	3	15	20	13	9	5	13	17	46	11	8	21	6	25	0	8	14	7	4	3	4	5	5	6	5	5	8	14
K18416 3'-5' exoribonuclease 1 [EC:3.1.-.-]	0	0	0	0	1	0	0	0	0	0	0	3	0	0	2	0	0	2	0	0	1	0	0	0	0	0	0	0	1	0	0	0	0	0	0	0	0	0	0	0	0	0	0	0	0	0	0	0	0
K08754 fatty acid-binding protein 5, epidermal	0	0	0	0	0	0	0	0	0	0	0	0	0	0	0	0	0	0	0	0	0	0	0	0	0	0	0	0	0	0	0	0	0	0	0	0	0	0	0	0	0	0	0	0	0	0	0	0	0
K03521 electron transfer flavoprotein beta subunit	156	155	99	81	153	207	96	117	88	77	109	146	97	148	103	81	139	173	119	116	139	183	431	348	171	96	113	125	405	656	194	79	118	192	293	262	175	70	80	46	97	75	69	84	85	54	79	100	66
K04015 protein NrfD	5	13	4	0	1	0	19	7	1	0	2	0	8	11	3	0	0	0	1	1	6	5	9	1	17	4	2	0	16	1	9	2	1	2	0	0	14	2	3	0	0	0	0	0	0	1	3	8	0
K18447 ADP-sugar diphosphatase [EC:3.6.1.21]	0	2	0	0	0	0	0	0	0	0	0	0	0	0	0	0	0	0	0	0	0	0	0	0	0	0	0	0	0	0	0	0	0	0	0	0	0	0	0	0	0	0	0	0	0	0	0	0	0
K14205 phosphatidylglycerol lysyltransferase [EC:2.3.2.3]	0	0	1	0	0	0	0	0	0	0	0	0	0	0	0	0	0	0	0	0	0	1	4	0	0	0	0	1	2	3	2	0	0	1	0	0	1	2	4	2	4	5	8	2	7	0	4	2	1
K00084 carbonyl reductase 3 [EC:1.1.1.184]	0	0	1	0	0	0	0	0	2	0	0	0	2	0	0	0	0	0	0	0	0	0	0	0	1	0	0	0	1	0	0	0	0	0	7	0	0	1	1	0	0	0	0	0	0	0	0	0	0
K20762 thiocyanate hydrolase subunit gamma [EC:3.5.5.8]	1	0	0	0	0	0	0	0	0	0	0	0	3	0	0	0	0	0	0	0	0	0	0	0	0	0	0	0	0	0	0	0	0	0	0	0	0	0	0	0	0	0	0	0	0	0	0	0	0
K00800 3-phosphoshikimate 1-carboxyvinyltransferase [EC:2.5.1.19]	37	26	18	16	18	32	22	29	12	18	32	57	26	29	22	17	25	34	19	12	28	37	174	152	29	14	36	29	98	179	43	20	35	32	135	120	51	33	20	13	29	20	27	19	20	28	20	29	19
K06601 flagellar biosynthesis repressor protein FlbT	1	4	1	1	0	1	1	3	1	0	11	1	1	6	4	0	0	3	1	1	1	1	5	0	2	0	1	0	1	9	3	5	3	1	0	0	12	3	3	0	2	2	2	0	0	0	4	1	2
K02188 cobalt-precorrin-5B (C1)-methyltransferase [EC:2.1.1.195]	8	11	8	4	3	2	6	6	2	4	3	0	2	6	1	0	10	1	7	0	3	5	0	5	5	0	0	0	2	2	5	0	0	5	14	0	0	0	1	1	12	1	1	0	1	2	1	1	1
K07400 Fe/S biogenesis protein NfuA	31	18	6	8	10	15	6	16	9	3	24	19	27	21	6	4	16	3	2	8	12	11	43	42	15	3	17	4	42	89	21	7	8	26	51	64	4	8	4	10	18	10	12	5	5	5	4	6	8
K15052 propionyl-CoA carboxylase [EC:6.4.1.3 2.1.3.15]	5	14	4	1	12	15	6	15	2	4	3	4	5	8	2	6	0	10	2	9	9	17	23	40	8	1	7	8	7	20	13	7	3	21	22	14	10	3	2	3	16	4	5	4	4	6	5	3	2
K12267 peptide methionine sulfoxide reductase msrA/msrB [EC:1.8.4.11 1.8.4.12]	83	34	19	2	10	23	35	15	14	11	19	28	66	17	8	6	3	15	24	15	20	28	34	43	47	13	1	19	40	18	20	6	22	22	33	64	7	7	20	3	13	8	15	7	10	12	3	13	11
K07915 Ras-related protein Rab-28	0	0	0	0	0	0	0	0	0	0	0	0	0	0	0	0	0	0	0	0	0	0	0	0	0	0	0	1	0	0	0	0	0	0	0	0	0	0	0	0	0	1	0	0	0	0	0	0	0
K12425 long-chain fatty acid adenylase/transferase FadD23 [EC:6.2.1.57]	0	0	0	0	0	0	0	0	0	0	0	1	0	0	0	0	0	0	0	0	0	5	0	0	0	0	0	0	0	0	0	0	0	0	0	0	2	0	0	0	0	0	0	0	0	1	0	0	1
K03224 ATP synthase in type III secretion protein N [EC:7.4.2.8]	3	7	0	3	5	2	4	4	0	4	4	1	5	5	3	1	1	2	6	3	7	9	13	7	10	6	8	7	3	15	8	0	1	4	9	8	1	6	2	2	5	2	2	5	2	1	5	6	3
K13766 methylglutaconyl-CoA hydratase [EC:4.2.1.18]	16	8	2	15	2	8	4	8	11	5	10	12	12	7	1	4	2	5	9	7	10	17	33	39	3	2	7	14	18	26	12	1	13	12	26	21	2	5	0	1	1	4	5	4	7	2	4	4	3
K17749 3-benzylmalate isomerase [EC:4.2.1.-]	1	2	2	0	0	0	0	5	1	2	0	0	1	0	1	0	0	0	6	0	0	0	0	0	1	0	0	1	0	1	1	0	0	0	0	0	0	0	0	0	0	0	0	0	0	0	0	0	0
K21525 endonuclease I [EC:3.1.21.2]	0	0	0	0	0	0	0	0	0	0	0	0	0	0	0	0	0	0	0	0	0	0	0	0	1	0	0	0	0	0	0	0	0	0	0	0	0	0	0	0	0	0	0	0	0	0	0	0	0
K17210 inositol transport system ATP-binding protein	3	0	3	0	0	0	1	2	1	0	3	2	0	1	3	2	0	0	1	0	0	1	0	0	2	0	0	1	0	0	0	0	0	0	0	15	1	0	0	0	0	0	1	1	0	0	0	0	0
K01054 acylglycerol lipase [EC:3.1.1.23]	4	5	3	6	0	7	1	1	1	0	3	9	2	7	1	0	0	0	6	2	4	2	29	4	4	4	0	4	7	16	15	7	1	8	0	29	9	1	1	2	6	1	3	4	4	7	4	5	3
K13660 beta-1,4-glucosyltransferase [EC:2.4.1.-]	0	0	0	0	0	0	0	0	0	0	0	0	0	0	0	0	0	1	0	0	0	0	0	0	0	0	0	0	0	0	0	0	0	0	0	0	0	0	0	0	0	0	0	0	0	0	0	0	0
K12687 antigen 43	0	0	0	0	0	0	0	0	0	0	0	0	0	0	0	0	0	0	0	0	1	0	0	0	0	0	0	0	0	0	0	0	0	0	0	0	0	0	0	0	0	0	0	0	0	0	0	0	0
K02724 photosystem II PsbZ protein	0	3	0	0	0	0	0	0	0	0	0	0	1	0	0	0	0	0	0	0	0	0	0	0	0	0	0	0	0	0	0	0	0	0	0	0	0	0	0	0	0	4	2	0	0	0	0	0	3
K09910 uncharacterized protein	0	0	0	0	0	0	0	0	0	0	0	0	0	0	0	0	0	0	0	0	0	0	0	0	0	0	0	0	0	0	0	0	3	0	0	0	0	0	0	0	0	0	0	0	0	0	0	0	0
K00153 S-(hydroxymethyl)mycothiol dehydrogenase [EC:1.1.1.306]	11	15	5	8	11	5	6	7	7	0	3	6	8	13	3	8	0	2	2	4	3	11	4	3	1	5	2	6	10	5	2	3	5	9	7	5	1	2	0	1	3	0	0	0	1	1	1	5	2
K13484 5-hydroxyisourate hydrolase / 2-oxo-4-hydroxy-4-carboxy-5-ureidoimidazoline decarboxylase [EC:3.5.2.17 4.1.1.97]	0	0	0	0	0	0	0	0	0	0	0	0	0	0	0	0	0	0	0	0	0	0	0	0	0	0	0	0	0	0	0	0	0	0	0	0	0	0	0	0	0	0	0	0	0	0	0	0	0
K09021 aminoacrylate peracid reductase	1	4	0	3	7	0	1	1	2	1	0	0	1	0	1	0	0	0	2	0	1	2	0	13	0	0	0	2	1	18	1	2	0	0	0	0	0	1	0	1	0	0	0	0	0	0	0	0	0
K07951 ADP-ribosylation factor-like protein 6	0	0	0	0	0	0	0	0	0	0	0	0	0	0	0	0	0	0	0	0	0	0	0	0	0	0	0	0	0	0	0	0	0	0	0	0	0	1	0	0	0	0	0	0	0	0	0	0	0
K00815 tyrosine aminotransferase [EC:2.6.1.5]	0	0	0	0	0	0	0	0	0	0	0	0	0	0	0	0	0	0	0	0	0	0	0	0	0	0	0	0	0	0	0	0	0	0	0	0	0	0	0	0	0	0	0	0	0	0	0	0	0
K00632 acetyl-CoA acyltransferase [EC:2.3.1.16]	115	162	83	86	157	268	103	101	130	110	144	217	119	123	112	105	174	254	180	131	158	304	723	574	210	117	179	189	493	772	208	109	153	230	772	397	195	108	125	64	150	112	142	131	109	108	131	136	80
K19856 3-O-methyltransferase [EC:2.1.1.-]	1	0	1	0	0	0	0	0	0	3	5	0	0	0	0	0	0	0	0	0	1	3	4	2	1	0	0	2	2	0	1	1	0	0	0	0	0	0	1	1	0	0	1	1	1	0	1	0	0
K01820 L-rhamnose isomerase / sugar isomerase [EC:5.3.1.14 5.3.1.-]	13	3	4	0	4	7	10	9	2	3	9	9	9	10	5	1	0	6	4	1	16	4	24	17	1	1	3	3	1	34	0	8	5	10	32	8	3	2	6	2	7	3	4	11	10	5	4	2	3
K02396 flagellar hook-associated protein 1	5	10	17	10	14	26	7	21	15	14	9	26	11	16	13	7	37	46	10	22	35	22	73	73	32	12	13	26	68	94	33	3	27	23	47	34	39	12	5	11	22	14	13	14	13	14	19	20	11
K00681 gamma-glutamyltranspeptidase / glutathione hydrolase [EC:2.3.2.2 3.4.19.13]	114	106	58	32	72	92	52	73	70	64	89	98	87	58	78	41	42	123	31	31	63	95	236	175	50	28	71	61	140	265	42	35	56	114	267	109	25	31	45	16	53	32	53	47	88	93	26	31	38
K08964 methylthioribulose-1-phosphate dehydratase [EC:4.2.1.109]	0	0	0	0	1	0	3	0	0	0	0	0	0	0	0	0	0	0	0	0	0	0	0	0	0	0	0	0	0	0	0	0	0	0	0	0	0	0	0	0	0	0	0	0	0	0	0	0	0
K08956 AFG3 family protein [EC:3.4.24.-]	1	0	0	0	0	2	0	0	0	0	0	0	0	0	0	0	0	0	0	1	1	0	0	0	0	1	0	0	6	0	2	0	2	0	0	0	1	9	7	0	0	0	0	0	0	0	0	0	1
K18676 glucosamine kinase [EC:2.7.1.8]	0	0	0	0	0	1	0	0	0	0	0	2	4	1	0	0	0	0	2	0	1	3	12	0	1	0	2	0	4	4	0	0	0	0	0	0	0	1	1	2	0	0	0	0	0	2	0	1	0
K15471 O-methyltransferase [EC:2.1.1.-]	2	1	0	0	1	3	0	0	0	0	0	2	3	0	0	0	0	1	1	0	0	1	1	0	3	2	0	2	6	4	4	3	0	1	0	0	3	1	1	5	1	1	0	0	0	0	0	1	0
K08479 two-component system, OmpR family, clock-associated histidine kinase SasA [EC:2.7.13.3]	0	0	0	0	0	2	0	0	1	0	0	1	0	0	0	0	0	0	0	0	0	5	7	0	1	0	1	4	3	2	3	0	2	6	0	15	2	4	2	4	1	4	2	0	0	0	2	5	2
K21904 metallothionein	0	0	0	0	0	0	1	0	0	0	0	0	0	0	0	0	0	0	0	0	0	0	0	0	0	1	0	0	0	0	0	0	0	0	0	0	3	0	0	0	0	0	0	0	0	0	0	1	0
K01181 endo-1,4-beta-xylanase [EC:3.2.1.8]	17	13	10	15	22	21	15	9	12	5	23	21	6	10	11	2	9	21	10	7	16	29	60	115	10	13	21	12	70	108	19	11	17	23	73	161	2	4	9	8	22	4	6	9	8	10	5	9	7
K10457 kelch-like protein 20	0	0	0	0	0	0	0	0	0	0	0	0	0	0	0	0	0	0	0	0	0	0	0	0	0	0	0	0	0	0	0	0	0	0	0	0	0	0	0	0	0	0	0	1	0	0	0	0	0
K01629 rhamnulose-1-phosphate aldolase [EC:4.1.2.19]	8	3	0	1	0	1	1	5	2	1	0	2	6	1	1	0	0	1	0	1	2	0	1	7	3	0	1	1	7	7	1	1	0	0	1	0	4	1	1	1	3	1	0	1	0	1	0	2	0
K01921 D-alanine-D-alanine ligase [EC:6.3.2.4]	55	35	18	20	34	33	34	35	27	19	24	30	42	31	16	29	53	30	40	15	30	72	167	123	50	25	50	48	141	211	77	36	61	53	188	135	81	45	79	40	113	71	107	95	100	142	57	63	80
K16422 4-hydroxymandelate oxidase [EC:1.1.3.46]	5	5	1	1	12	1	7	1	1	1	3	0	3	4	0	2	0	3	1	0	3	1	8	4	7	0	1	4	22	31	4	2	0	6	2	0	1	3	1	2	5	1	4	1	2	3	3	2	0
K19971 manganese/zinc transport system substrate-binding protein	0	0	0	0	1	0	0	0	0	0	0	0	0	1	0	0	0	0	0	0	0	0	0	0	0	0	0	0	0	0	0	0	0	0	0	0	0	0	0	0	0	0	0	0	0	0	0	0	0
K16862 mitochondrial cardiolipin hydrolase [EC:3.1.4.-]	0	1	0	0	0	0	0	1	1	0	0	0	0	2	0	0	0	0	0	0	0	0	0	0	0	0	3	0	0	0	0	0	0	0	0	0	0	0	1	0	2	0	0	0	0	0	0	1	0
K11540 carbamoyl-phosphate synthase / aspartate carbamoyltransferase / dihydroorotase [EC:6.3.5.5 2.1.3.2 3.5.2.3]	3	5	3	8	4	4	2	5	1	2	11	3	5	8	7	11	0	12	2	3	8	19	23	3	6	2	1	10	23	46	4	1	14	7	3	28	3	2	2	1	6	3	6	4	4	7	1	2	2
K09764 uncharacterized protein	20	13	6	8	7	15	7	2	6	1	6	12	11	5	5	5	19	11	3	2	9	7	38	37	6	0	12	5	16	61	7	1	8	7	47	3	6	2	5	1	4	2	3	4	8	9	1	6	5
K01604 methylmalonyl-CoA decarboxylase subunit alpha [EC:7.2.4.3]	3	13	1	0	7	5	4	3	5	8	5	1	0	2	6	1	4	2	1	8	11	1	0	12	10	14	1	6	6	19	16	10	4	4	6	1	14	5	5	3	3	3	4	0	0	2	5	6	2
K06373 spore maturation protein A	2	0	0	0	4	0	0	0	1	0	0	0	1	0	0	0	3	1	6	0	0	3	3	0	0	0	0	0	0	0	1	0	0	0	0	0	1	0	0	1	1	1	2	0	0	0	1	2	1
K20433 C7-cyclitol 7-kinase [EC:2.7.1.214]	0	0	0	0	0	0	0	0	0	0	0	0	0	0	0	0	0	0	0	0	0	0	0	0	0	1	1	0	0	0	0	0	0	0	0	0	1	0	0	0	0	0	0	0	0	0	0	0	0
K17990 vanadium chloroperoxidase [EC:1.11.1.10]	0	0	0	0	0	0	0	0	0	0	0	0	0	0	0	0	0	0	1	0	0	0	0	0	0	0	0	0	0	0	0	0	0	0	0	0	0	0	0	0	0	0	0	0	0	0	0	0	0
K14201 clumping factor A	2	1	0	1	0	1	0	1	1	1	0	0	0	1	0	0	0	1	1	0	0	1	1	0	0	0	0	0	3	0	0	0	0	0	0	0	0	0	0	0	0	0	0	0	0	0	1	0	0
K02464 general secretion pathway protein O [EC:3.4.23.43 2.1.1.-]	1	0	0	0	0	0	0	0	0	0	0	0	0	0	0	0	0	0	5	0	0	0	0	0	0	0	0	0	0	0	0	0	0	0	0	0	0	0	0	0	0	0	0	0	0	0	0	0	0
K00729 dolichyl-phosphate beta-glucosyltransferase [EC:2.4.1.117]	6	1	4	0	0	3	1	6	4	1	0	1	7	7	1	0	23	4	0	9	3	2	7	4	3	2	3	5	7	14	3	2	4	0	5	1	0	2	5	2	4	2	1	0	0	0	0	3	4
K14326 regulator of nonsense transcripts 1 [EC:3.6.4.-]	0	0	0	0	0	0	0	0	0	0	0	0	0	0	0	0	0	1	0	0	0	2	0	0	0	0	0	1	0	0	0	0	0	0	0	0	0	0	1	1	0	0	0	0	0	0	0	1	0
K03932 polyhydroxybutyrate depolymerase	2	2	2	4	1	1	8	5	3	0	5	3	3	5	10	0	0	8	5	6	1	8	11	25	3	7	5	6	7	20	6	6	8	10	11	6	8	0	9	1	7	4	1	1	0	0	2	4	0
K00094 galactitol-1-phosphate 5-dehydrogenase [EC:1.1.1.251]	1	4	1	0	0	1	0	4	0	1	0	2	0	2	2	0	17	3	0	0	3	3	14	0	2	0	3	2	2	2	0	0	3	0	20	24	0	0	1	0	0	0	0	0	0	2	0	0	0
K02379 FdhD protein	34	17	5	6	20	14	5	10	5	8	19	16	14	10	3	11	23	21	9	6	13	21	36	60	16	12	11	17	49	107	7	1	8	16	37	73	5	6	7	3	12	9	9	6	7	14	4	7	1
K22843 ETFB lysine methyltransferase [EC:2.1.1.-]	0	0	0	0	0	0	0	0	0	0	0	0	0	0	0	0	0	0	0	0	0	0	0	0	1	0	0	0	0	0	0	0	0	0	0	0	0	1	0	0	0	0	0	0	0	0	0	0	0
K08717 urea transporter	0	0	0	0	0	0	0	0	0	0	0	0	0	0	0	0	0	0	0	0	0	0	0	0	0	0	0	0	0	0	2	0	0	0	0	0	0	1	0	0	0	0	0	0	0	0	0	0	0
K01174 micrococcal nuclease [EC:3.1.31.1]	24	17	5	3	9	12	13	5	12	7	4	11	16	6	1	10	7	7	16	5	8	8	42	39	8	10	6	5	29	47	10	3	3	10	36	38	9	9	8	5	6	10	4	0	4	5	7	11	5
K16556 succinoglycan biosynthesis protein ExoM [EC:2.4.-.-]	0	2	0	0	0	0	0	4	1	0	0	0	0	0	0	0	0	0	0	0	4	2	4	4	2	0	0	0	2	0	3	0	1	0	19	6	0	0	1	0	2	1	2	4	0	0	0	2	3
K21105 mono(ethylene terephthalate) hydrolase [EC:3.1.1.102]	7	18	6	1	1	1	2	6	0	5	1	0	3	8	7	9	0	7	1	3	1	7	0	1	5	3	6	5	8	5	4	1	10	3	2	0	1	2	1	1	0	1	1	0	0	0	3	2	0
K21029 molybdopterin-synthase adenylyltransferase [EC:2.7.7.80]	28	46	7	8	16	31	23	27	18	7	18	37	29	46	13	7	34	12	13	8	21	23	99	86	20	9	21	14	47	79	16	5	3	34	30	41	24	17	7	5	17	4	5	14	10	20	12	11	9
K07890 Ras-related protein Rab-21	0	0	0	0	3	0	0	0	0	0	8	0	0	0	0	2	0	1	0	2	1	3	19	7	1	3	3	10	8	19	2	1	13	0	2	0	0	1	2	1	6	0	2	3	1	8	0	2	0
K00558 DNA (cytosine-5)-methyltransferase 1 [EC:2.1.1.37]	22	22	15	12	15	40	16	19	13	7	36	43	18	19	6	6	33	51	24	16	31	17	83	73	29	19	12	23	53	99	27	6	30	24	118	29	21	16	15	14	20	17	24	13	9	10	13	23	20
K01169 ribonuclease I (enterobacter ribonuclease) [EC:4.6.1.21]	0	0	0	0	0	0	0	0	0	0	0	0	0	0	0	0	0	0	0	0	0	0	0	0	0	0	0	0	0	0	0	0	0	0	0	0	0	0	0	0	0	0	0	0	0	0	0	0	0
K02851 UDP-GlcNAc:undecaprenyl-phosphate/decaprenyl-phosphate GlcNAc-1-phosphate transferase [EC:2.7.8.33 2.7.8.35]	18	24	8	23	7	21	18	24	20	15	17	38	17	5	13	19	1	19	22	22	23	36	93	71	14	10	24	11	48	40	36	18	16	35	84	45	14	8	14	10	9	11	14	11	16	26	11	12	6
K02923 large subunit ribosomal protein L38e	0	0	1	0	0	0	0	0	0	0	0	0	0	0	0	1	0	1	0	0	0	1	5	5	0	0	0	1	5	6	0	0	0	0	0	0	1	0	2	0	2	0	0	0	1	1	0	1	1
K22210 D-glutamate cyclase [EC:4.2.1.48]	6	0	1	3	4	4	2	3	0	1	4	3	4	12	1	4	15	1	0	0	4	2	13	9	2	0	0	4	5	0	12	0	5	5	7	12	0	0	0	1	0	0	1	0	1	1	0	1	0
K16648 arabinofuranan 3-O-arabinosyltransferase [EC:2.4.2.-]	0	0	0	0	0	0	0	0	0	0	0	0	0	0	0	0	0	0	0	0	0	0	0	0	0	0	0	0	0	0	0	0	0	0	0	0	0	0	0	0	0	0	0	0	0	0	0	0	0
K22477 N-acetylglutamate synthase [EC:2.3.1.1]	0	0	0	0	1	0	0	0	0	0	0	0	0	0	0	0	0	0	0	0	0	0	0	2	0	1	0	1	0	0	0	0	0	0	0	2	0	0	0	0	0	0	0	0	0	0	0	0	0
K18920 protein HokA	0	0	0	0	0	0	0	0	0	0	0	0	0	0	0	0	0	0	0	0	0	0	0	0	0	0	0	0	0	0	0	0	0	0	0	0	0	0	0	0	0	0	0	0	0	0	0	0	0
K17244 putative chitobiose transport system substrate-binding protein	0	0	0	0	1	0	0	0	0	0	0	0	0	0	0	0	0	0	0	0	0	1	0	0	2	1	0	0	2	0	0	1	0	4	0	0	1	1	0	1	1	0	2	0	0	0	0	0	0
K19207 candicidin polyketide synthase FscD	0	0	0	0	0	0	0	0	0	0	0	0	0	1	0	0	0	0	0	0	0	0	0	0	0	0	0	0	0	0	0	0	0	0	0	0	0	0	0	0	0	0	0	0	0	0	0	0	0
K09818 manganese/iron transport system substrate-binding protein	3	0	0	1	4	0	2	0	1	0	0	0	3	0	0	2	0	0	0	0	1	0	0	1	1	2	2	0	1	0	0	0	0	0	0	0	0	1	1	0	2	0	1	1	3	0	1	2	2
K02575 MFS transporter, NNP family, nitrate/nitrite transporter	145	185	36	10	7	1	118	78	22	18	7	4	134	145	33	20	8	10	10	12	6	10	26	21	15	9	1	2	7	8	20	6	0	5	0	15	2	12	5	1	3	1	3	7	3	1	5	4	3
K04029 ethanolamine utilization protein EutP	0	0	0	0	0	0	0	0	0	0	0	0	0	0	0	0	0	0	0	0	0	0	0	0	0	0	0	0	0	0	0	0	0	0	0	0	0	0	0	0	0	0	0	0	0	0	0	0	0
K01000 phospho-N-acetylmuramoyl-pentapeptide-transferase [EC:2.7.8.13]	23	36	22	16	29	37	17	25	18	25	52	26	19	35	28	25	31	40	26	20	34	43	114	125	35	24	24	52	70	101	52	14	31	38	121	16	20	22	15	15	17	8	8	10	16	20	17	28	11
K02550 glycolate permease	0	0	0	0	0	0	0	0	0	0	0	0	0	0	0	0	0	0	0	0	0	0	0	0	0	0	0	0	0	0	0	0	0	0	0	0	0	0	0	0	0	0	0	0	0	0	0	0	0
K19515 benzoyl-CoA reductase subunit BamB [EC:1.3.-.-]	25	10	3	5	13	28	9	10	9	25	20	23	8	10	8	4	8	24	4	15	22	23	67	67	12	9	8	16	67	68	18	9	16	15	33	19	11	8	6	4	3	5	1	3	3	11	10	5	5
K07796 outer membrane protein, copper/silver efflux system	0	1	0	0	0	0	0	0	0	0	0	0	0	0	0	0	0	0	0	0	0	0	0	0	0	0	0	0	0	0	0	0	0	0	0	0	0	0	0	0	0	0	0	0	0	0	0	0	0
K07096 uncharacterized protein	3	16	11	1	5	20	5	13	8	11	20	8	2	4	9	0	0	12	7	9	26	22	36	35	5	6	11	17	29	44	10	2	17	29	50	33	4	5	2	5	18	2	10	10	6	10	3	8	9
K22073 transferase CAF17, mitochondrial [EC:2.1.-.-]	1	0	0	0	0	0	0	0	0	0	0	0	1	0	0	0	0	0	0	0	0	0	0	0	0	0	0	0	0	0	0	0	0	0	0	0	0	0	0	0	0	0	0	0	0	0	1	0	0
K00862 erythritol kinase (D-erythritol 1-phosphate-forming) [EC:2.7.1.215]	0	1	0	0	0	0	0	0	0	0	0	0	0	0	0	0	0	0	0	0	0	0	0	0	0	0	0	2	0	0	0	0	0	0	0	0	0	0	0	0	2	0	0	0	0	0	0	0	0
K19955 alcohol dehydrogenase [EC:1.1.1.-]	4	5	1	1	1	3	7	0	2	1	2	3	1	2	4	7	0	0	1	1	1	1	9	4	7	4	6	5	3	18	21	4	0	3	9	14	8	5	5	2	2	2	5	6	8	3	0	4	2
K14592 glutamate carboxypeptidase II (folate hydrolase 1) [EC:3.4.17.21]	0	0	0	3	0	0	0	1	0	0	0	0	2	1	0	4	0	0	0	1	0	0	0	3	0	0	0	0	0	2	0	0	0	0	4	0	0	0	0	0	0	0	0	0	0	0	0	0	0
K03911 antithrombin III	0	1	0	0	0	1	0	0	0	0	0	0	0	0	0	0	0	1	0	0	0	0	0	4	0	0	0	1	0	0	0	0	0	0	4	0	0	0	0	0	0	0	0	0	0	0	0	0	0
K13929 malonate decarboxylase alpha subunit [EC:2.3.1.187]	0	0	0	0	0	0	0	0	0	0	0	0	0	0	0	0	0	0	0	1	1	1	0	0	0	0	0	0	0	0	0	0	0	0	0	0	0	0	0	0	0	0	2	0	0	0	0	0	0
K11921 LysR family transcriptional regulator, cyn operon transcriptional activator	7	9	0	0	2	4	0	0	1	2	0	0	1	2	1	0	0	0	5	0	0	0	0	1	1	3	2	0	2	0	0	1	0	0	17	0	1	2	1	0	1	1	1	0	0	0	0	0	1
K19286 FMN reductase [NAD(P)H] [EC:1.5.1.39]	1	5	8	5	11	19	5	4	4	2	11	23	7	7	9	3	10	19	11	4	9	11	47	51	10	4	15	19	33	63	8	2	7	18	37	55	17	4	2	5	9	6	7	8	7	10	3	6	4
K07901 Ras-related protein Rab-8A	1	0	0	0	2	4	0	1	1	2	5	4	0	0	0	7	9	14	6	1	8	5	54	5	2	1	3	7	28	30	4	0	7	11	13	0	1	1	1	0	5	3	2	2	4	4	0	1	3
K20285 Rab9 effector protein with kelch motifs	0	0	0	0	0	0	0	0	0	1	0	0	0	0	0	0	0	0	0	0	0	0	0	0	0	0	0	0	0	0	0	0	0	0	0	0	0	0	0	0	0	0	0	0	0	0	0	0	0
K11717 cysteine desulfurase / selenocysteine lyase [EC:2.8.1.7 4.4.1.16]	81	71	31	27	54	91	37	54	29	8	45	66	77	46	28	7	93	63	12	19	44	54	134	136	39	17	39	57	91	150	43	17	30	49	107	71	32	31	43	17	34	27	30	21	20	25	24	32	34
K21154 exopolysaccharide glucosyl ketal-pyruvate-transferase [EC:2.5.1.98]	0	2	0	0	0	0	0	0	0	0	0	0	0	0	0	0	0	0	0	0	0	0	0	0	0	0	0	0	0	0	0	0	0	0	0	0	0	0	1	0	0	0	0	0	0	0	0	0	0
K00507 stearoyl-CoA desaturase (Delta-9 desaturase) [EC:1.14.19.1]	58	40	6	3	3	0	36	26	22	4	4	1	48	32	15	9	15	2	18	26	12	15	13	9	32	16	16	11	20	4	34	11	10	9	0	0	25	28	15	3	6	3	10	2	4	3	15	18	18
K07937 ADP-ribosylation factor 1/2	0	0	0	0	0	3	0	0	0	0	0	2	0	0	0	0	17	0	0	0	0	0	4	5	0	0	0	0	1	0	0	0	0	4	0	0	0	0	0	0	0	0	0	0	0	0	0	0	0
K23536 general nucleoside transport system permease protein	1	2	0	2	3	4	3	1	3	4	3	3	1	5	4	5	0	4	6	2	5	7	0	6	4	1	4	3	6	4	2	11	1	2	0	0	1	1	0	3	0	1	1	0	4	0	3	0	2
K09488 TNF receptor-associated protein 1	5	6	0	0	8	6	7	1	1	1	3	13	14	10	2	0	0	4	0	0	0	1	7	20	2	0	2	0	3	6	2	2	1	0	0	0	4	1	0	0	3	5	0	3	0	1	0	2	2
K13891 glutathione transport system permease protein	12	6	7	14	18	13	3	10	12	5	8	13	13	13	6	1	15	26	10	1	16	30	84	35	8	4	25	35	102	133	5	3	3	48	83	63	2	2	5	5	17	9	18	10	12	21	1	1	8
K11206 deaminated glutathione amidase [EC:3.5.1.128]	1	4	0	0	1	0	1	1	0	0	1	0	0	1	4	0	0	0	0	0	0	2	0	2	3	1	2	2	0	12	0	1	0	0	0	0	3	38	21	62	45	14	59	2	1	0	24	33	25
K03629 DNA replication and repair protein RecF	13	5	3	4	12	7	8	15	9	10	8	21	7	16	4	9	11	6	10	3	12	7	21	20	5	7	3	10	19	42	6	4	14	13	20	95	3	0	8	3	4	4	8	9	6	2	5	12	12
K07654 two-component system, OmpR family, sensor histidine kinase MtrB [EC:2.7.13.3]	0	0	0	2	0	0	0	0	0	0	0	1	1	0	2	0	0	0	0	0	2	1	0	1	0	0	0	0	0	0	0	0	0	2	0	0	0	0	0	1	0	0	0	1	0	0	0	1	1
K09908 uncharacterized protein	4	2	0	0	0	0	2	0	0	1	0	0	3	1	0	0	0	0	0	0	0	0	0	0	1	0	0	0	0	0	0	0	0	0	0	0	0	0	1	0	0	0	0	0	0	0	1	0	0
K05597 glutamin-(asparagin-)ase [EC:3.5.1.38]	0	0	0	0	0	0	0	0	0	0	0	0	1	0	0	0	0	0	0	0	0	0	0	0	0	0	0	0	0	0	0	0	0	0	0	0	0	0	0	0	0	0	0	0	0	0	0	0	0
K20810 aminodeoxyfutalosine deaminase [EC:3.5.4.40]	3	1	0	1	0	0	0	0	1	0	3	0	2	4	4	0	0	0	0	0	0	1	5	0	0	0	1	0	1	0	5	0	2	0	6	0	4	3	2	0	0	0	1	0	0	0	5	2	2
K14157 alpha-aminoadipic semialdehyde synthase [EC:1.5.1.8 1.5.1.9]	10	15	5	9	11	6	2	13	6	3	20	8	7	12	7	2	0	15	3	12	13	10	33	9	12	13	14	12	27	39	16	5	27	14	48	62	7	11	11	5	6	10	14	6	8	15	7	9	3
K19519 transforming growth factor-beta-induced protein	69	8	10	10	2	5	23	18	3	0	3	5	56	6	9	0	0	6	15	17	72	101	75	54	224	24	22	17	208	166	107	13	8	10	6	11	5	7	22	7	12	10	18	15	16	18	3	13	1
K02056 simple sugar transport system ATP-binding protein [EC:7.5.2.-]	136	129	79	46	83	115	77	109	59	39	60	99	83	106	73	55	107	73	64	46	82	126	198	237	89	50	64	125	274	581	67	46	60	95	217	178	28	22	34	41	41	32	59	107	142	126	20	42	21
K02408 flagellar hook-basal body complex protein FliE	3	4	1	3	3	10	1	5	3	5	12	4	8	1	1	0	0	6	2	7	3	6	20	37	9	1	7	3	25	32	15	1	16	11	30	0	8	4	4	1	7	2	4	2	6	2	7	6	2
K18955 WhiB family transcriptional regulator, redox-sensing transcriptional regulator	6	0	1	1	0	0	2	3	0	2	0	0	8	4	0	0	0	0	0	0	0	0	0	0	0	2	0	0	0	0	0	4	0	0	4	0	8	43	33	4	1	3	0	6	0	0	21	41	12
K08993 putative membrane protein	0	0	0	0	0	0	0	0	0	0	0	0	0	0	0	0	0	0	0	0	0	0	0	0	1	0	0	0	0	0	0	0	0	0	0	0	0	0	0	0	0	0	0	0	0	0	0	0	0
K03488 beta-glucoside operon transcriptional antiterminator	0	0	0	0	0	0	0	0	0	0	0	0	0	0	0	0	0	0	0	0	0	0	0	0	0	0	0	0	0	0	0	0	0	0	0	0	0	0	0	0	0	0	0	1	0	0	0	0	0
K00654 serine palmitoyltransferase [EC:2.3.1.50]	4	12	4	2	1	0	2	2	1	1	6	3	3	0	1	0	2	0	0	0	0	2	0	2	1	1	2	0	2	1	2	0	0	0	3	0	0	1	1	0	1	0	1	2	1	0	1	0	3
K20269 rhizosphere induced protein	0	0	0	0	0	0	0	0	0	0	0	4	0	0	0	0	0	0	0	0	0	0	0	0	0	0	0	0	1	6	0	0	0	0	0	1	0	0	0	0	0	0	0	0	0	0	1	0	0
K19889 demethylrebeccamycin-D-glucose O-methyltransferase [EC:2.1.1.164]	0	1	0	0	0	0	0	0	0	0	0	0	0	0	0	0	0	0	0	0	0	0	0	0	0	0	0	0	0	0	0	0	0	1	0	0	0	0	0	0	0	0	0	0	0	0	0	0	1
K04108 4-hydroxybenzoyl-CoA reductase subunit alpha [EC:1.1.7.1]	35	41	10	12	50	63	22	34	23	23	27	34	22	27	24	13	9	30	17	16	53	37	85	118	29	24	23	30	69	137	30	11	30	37	135	170	51	6	16	5	16	13	11	13	11	9	24	12	8
K13317 NDP-4-keto-2,6-dideoxyhexose 3-C-methyltransferase [EC:2.1.1.-]	0	2	1	1	4	1	1	1	0	3	1	0	1	0	2	12	0	0	0	0	0	3	3	0	1	0	0	1	1	0	0	0	0	2	3	0	5	1	1	0	1	0	0	0	1	3	4	2	1
K14748 ethylbenzene dioxygenase subunit alpha [EC:1.14.12.-]	3	2	0	0	0	0	0	0	0	0	0	0	2	0	0	0	0	0	0	0	0	0	0	0	0	0	0	0	0	0	0	0	0	0	0	0	0	0	0	0	0	0	0	0	0	0	0	0	0
K11440 choline dehydrogenase [EC:1.1.1.1]	0	1	2	0	2	3	1	5	3	3	0	0	0	8	1	0	0	2	9	0	0	7	6	3	0	3	5	1	5	17	6	3	8	13	0	0	2	0	2	0	3	0	1	7	1	0	1	0	1
K18455 mycothiol S-conjugate amidase [EC:3.5.1.115]	4	0	0	2	5	7	2	3	1	0	1	2	1	2	1	0	0	1	1	0	0	4	3	0	1	0	2	2	1	11	1	2	1	0	17	7	0	1	2	2	0	3	1	0	0	0	2	2	0
K10984 galactosamine PTS system EIIB component [EC:2.7.1.-]	0	0	0	0	0	1	0	1	0	0	0	0	0	0	0	0	0	0	0	0	0	0	0	0	0	0	2	0	0	0	0	0	0	0	0	0	0	0	1	0	0	0	0	0	0	0	0	0	0
K10907 aminotransferase [EC:2.6.1.-]	48	46	37	22	53	87	40	38	33	24	62	84	34	38	40	22	39	62	22	29	54	69	227	221	39	27	47	47	153	352	23	19	37	89	234	296	18	11	23	14	38	31	44	31	22	30	14	14	24
K06905 uncharacterized protein	1	1	0	1	2	0	0	2	0	0	2	1	1	2	1	2	1	3	0	1	2	4	8	5	5	2	3	1	9	1	6	0	0	2	6	0	0	0	0	0	1	0	0	1	1	0	0	2	0
K01738 cysteine synthase [EC:2.5.1.47]	249	178	39	54	79	102	120	115	60	58	68	101	181	153	61	37	129	95	44	43	61	92	198	150	67	37	46	52	196	348	93	26	55	59	148	152	44	26	40	22	46	39	51	38	44	46	14	22	30
K05245 L-carnitine/gamma-butyrobetaine antiporter	0	0	1	0	0	0	0	0	0	0	0	0	0	0	0	0	0	0	0	0	0	0	0	0	0	0	0	0	0	0	1	0	0	0	0	0	0	2	1	1	0	0	0	1	0	6	2	0	0
K16870 N-acetylglucosaminyl-diphospho-decaprenol L-rhamnosyltransferase [EC:2.4.1.289]	12	3	1	0	3	18	2	12	1	0	4	1	13	7	5	0	0	1	2	3	2	10	15	11	11	0	1	4	13	18	9	4	7	6	16	6	3	4	3	1	4	3	3	2	4	1	3	4	2
K09969 general L-amino acid transport system substrate-binding protein	568	423	180	125	163	163	314	308	199	159	135	203	433	322	168	141	186	143	224	139	172	206	347	273	283	135	167	240	365	832	309	105	118	124	286	398	163	64	106	50	51	25	34	42	39	74	101	118	59
K15554 sulfonate transport system permease protein	8	4	1	1	5	1	4	1	3	1	7	0	2	2	0	2	5	1	2	0	8	4	7	10	9	0	2	4	6	8	3	2	3	8	25	0	1	1	4	0	9	0	3	1	0	2	1	1	0
K01092 myo-inositol-1(or 4)-monophosphatase [EC:3.1.3.25]	34	32	22	16	25	74	16	14	22	18	58	44	16	23	9	11	32	82	10	21	38	32	74	96	34	8	16	24	82	124	68	16	22	21	101	66	41	18	23	12	25	15	26	16	19	26	16	24	26
K02745 N-acetylgalactosamine PTS system EIIB component [EC:2.7.1.-]	0	0	0	0	0	0	0	2	0	0	0	0	0	0	0	0	0	0	0	0	0	0	2	0	0	0	0	0	1	0	0	0	0	0	0	9	0	0	1	0	0	0	0	0	0	0	0	0	0
K01919 glutamate--cysteine ligase [EC:6.3.2.2]	19	6	6	1	0	1	7	7	2	1	5	2	23	5	1	1	0	1	5	3	3	3	1	0	8	2	1	0	1	1	9	3	6	0	1	0	6	8	3	1	0	0	1	0	1	0	5	4	7
K18779 7-cyano-7-deazaguanine tRNA-ribosyltransferase [EC:2.4.2.48]	1	4	0	0	11	4	0	1	1	4	21	31	2	2	2	0	31	33	0	0	10	4	36	16	3	1	11	8	18	60	1	2	3	18	61	21	1	2	0	2	9	10	10	4	6	11	0	5	2
K15001 cytochrome P450 family 4 [EC:1.14.-.-]	1	0	0	0	0	0	0	0	0	0	0	0	0	0	0	0	0	0	0	0	0	0	0	0	0	0	0	0	0	0	0	0	0	0	0	0	0	0	0	0	0	0	0	0	0	0	0	0	0
K06877 DEAD/DEAH box helicase domain-containing protein	23	31	18	19	45	34	20	16	15	13	28	41	23	30	17	17	32	71	6	10	38	66	111	128	29	19	26	43	72	130	19	9	29	47	133	87	11	12	23	14	22	9	18	30	25	41	14	16	6
K02911 large subunit ribosomal protein L32	41	38	19	10	37	25	26	30	14	20	19	22	46	30	20	24	9	24	16	17	26	29	78	72	52	29	19	16	75	54	63	9	12	22	35	67	38	34	49	16	21	20	18	22	21	31	31	23	35
K16795 platelet-activating factor acetylhydrolase IB subunit beta/gamma [EC:3.1.1.47]	1	8	2	3	1	0	0	1	1	5	2	3	11	2	1	0	14	7	1	1	6	2	2	2	2	2	0	2	4	6	0	0	0	7	2	2	1	0	5	1	2	4	4	4	1	3	0	1	1
K00184 dimethyl sulfoxide reductase iron-sulfur subunit	341	381	80	66	120	91	332	334	133	88	98	71	267	400	86	62	175	117	95	77	79	121	168	120	160	84	51	54	202	148	230	45	52	75	112	161	190	54	48	34	53	17	20	13	18	21	116	67	41
K22099 dihydrofolate synthase / folylpolyglutamate synthase [EC:6.3.2.12 6.3.2.17]	1	3	0	0	0	0	0	0	0	0	0	0	0	0	0	0	0	0	0	0	0	1	0	0	0	0	0	0	0	1	0	0	0	0	0	0	0	0	0	0	1	0	0	0	0	2	0	0	0
K03676 glutaredoxin 3	10	0	7	4	4	7	10	3	1	1	3	3	2	4	5	3	0	2	4	2	2	11	28	6	17	7	4	1	14	19	12	4	3	6	42	33	22	7	15	1	8	2	6	3	4	6	10	9	19
K22044 moderate conductance mechanosensitive channel	6	13	11	4	26	12	8	11	5	6	7	4	9	11	9	2	10	11	5	5	10	7	76	74	5	6	10	15	46	75	7	9	2	20	46	124	6	8	10	4	20	3	18	2	10	8	12	15	8
K19124 CRISPR system Cascade subunit CasC	4	5	0	0	2	4	5	0	0	5	0	0	3	6	6	0	0	2	2	0	3	6	15	20	1	0	6	1	4	26	0	0	0	1	0	14	4	1	1	2	5	6	9	4	7	4	7	5	3
K03742 nicotinamide-nucleotide amidase [EC:3.5.1.42]	18	19	14	13	23	23	9	19	15	7	29	20	19	16	17	4	46	40	8	12	23	12	71	79	13	8	13	19	78	161	30	7	18	35	133	122	8	10	13	12	18	12	19	11	16	20	15	12	5
K22515 formate dehydrogenase beta subunit [EC:1.17.1.9]	0	0	0	0	0	0	0	0	0	0	0	0	0	0	0	0	0	0	0	0	0	0	0	0	1	0	0	0	0	0	0	0	0	0	0	0	0	0	0	0	1	0	0	0	0	0	0	1	1
K16229 glycopeptidolipid biosynthesis protein	2	0	0	0	1	0	0	3	0	4	1	4	3	0	0	0	0	1	0	0	3	0	0	0	4	0	0	1	1	12	0	2	2	1	0	0	0	0	2	1	0	1	0	0	0	0	1	1	1
K14666 N-acetylglucosaminyltransferase [EC:2.4.1.-]	0	0	0	0	0	0	0	0	0	0	2	0	0	0	0	1	0	0	0	0	0	0	0	0	0	0	1	0	0	0	0	0	0	1	0	0	1	0	0	0	0	0	0	0	0	0	0	0	0
K21161 enediyne biosynthesis protein E3	0	1	0	0	1	2	0	0	0	0	0	0	0	0	0	0	0	2	0	2	1	0	0	0	0	0	0	0	0	0	0	0	0	0	0	0	0	0	0	0	0	0	0	0	0	0	0	0	0
K18220 ribosomal protection tetracycline resistance protein	0	1	0	2	0	0	0	0	0	0	0	0	0	0	0	0	0	0	0	0	0	0	0	0	0	0	0	0	0	0	0	0	0	0	0	0	0	0	0	1	1	0	0	0	0	0	0	0	0
K15923 alpha-L-fucosidase 2 [EC:3.2.1.51]	37	55	36	47	61	57	42	32	32	20	67	42	18	39	26	8	78	58	35	23	57	38	128	169	44	29	34	47	79	133	42	24	45	75	121	149	11	22	35	16	41	37	45	36	39	43	7	25	33
K08985 putative lipoprotein	0	0	0	0	0	0	0	0	0	0	0	0	0	0	0	0	0	1	0	0	0	0	0	0	0	0	0	0	0	4	0	0	0	0	0	0	0	0	0	0	0	0	0	0	0	0	0	0	0
K02761 cellobiose PTS system EIIC component	1	1	0	1	13	5	1	0	2	1	2	17	0	0	0	0	0	2	1	4	5	7	7	24	2	3	2	3	6	18	1	1	4	7	5	0	0	0	1	6	3	3	7	5	7	0	0	2	0
K01732 pectin lyase [EC:4.2.2.10]	0	0	0	0	0	0	0	0	0	0	0	0	0	0	0	0	0	0	0	0	0	0	0	0	0	0	0	0	0	0	0	0	0	0	0	0	0	0	0	0	0	0	0	0	0	0	0	0	0
K05385 bilin biosynthesis protein	0	0	0	0	0	0	0	0	0	0	0	0	0	1	0	0	0	0	0	0	0	0	0	0	0	0	0	0	4	0	0	0	0	0	0	0	0	0	0	0	0	0	0	0	0	0	0	0	0
K21934 2-phosphonomethylmalate synthase [EC:2.3.3.19]	0	0	0	0	0	0	0	0	0	0	0	0	0	0	0	0	0	0	0	0	0	0	0	0	0	0	1	0	0	0	0	0	0	0	0	0	0	0	0	0	0	0	0	0	0	0	0	0	0
K09650 rhomboid-like protein [EC:3.4.21.105]	2	1	1	0	0	6	2	1	1	1	4	0	4	0	0	0	0	1	5	0	0	3	5	10	1	1	3	3	7	21	1	0	2	1	0	2	4	11	7	1	0	4	0	2	3	1	2	1	7
K01695 tryptophan synthase alpha chain [EC:4.2.1.20]	14	36	18	15	17	20	16	19	11	5	10	14	21	15	9	29	5	22	16	2	10	15	68	63	12	5	8	14	32	95	22	5	11	28	30	68	31	9	15	5	18	8	20	14	11	5	27	10	6
K07163 uncharacterized protein	0	0	0	0	0	0	0	0	7	0	0	3	0	1	0	3	0	0	0	0	1	3	0	0	5	0	2	0	4	0	0	0	1	1	0	0	0	0	0	0	5	0	2	2	1	5	0	1	0
K05989 alpha-L-rhamnosidase [EC:3.2.1.40]	24	33	38	24	60	47	14	17	21	18	35	49	20	34	34	33	20	59	44	28	46	65	160	188	19	16	28	43	140	236	30	15	34	68	203	249	10	18	29	21	28	44	34	42	36	35	18	20	22
K00491 nitric-oxide synthase, bacterial [EC:1.14.14.47]	0	0	0	0	0	0	0	0	0	0	0	0	0	0	0	0	0	0	0	0	0	0	0	0	0	0	0	0	0	0	0	0	0	0	0	0	0	0	0	0	0	0	0	0	0	0	0	0	0
K06978 uncharacterized protein	42	42	63	36	90	76	31	29	31	56	60	59	27	70	29	32	41	80	24	38	86	111	312	269	32	33	76	97	201	374	23	20	89	190	452	270	11	12	21	12	25	20	32	17	31	35	11	21	13
K07343 DNA transformation protein and related proteins	0	2	0	1	0	0	0	1	0	0	0	2	3	0	3	0	0	0	0	0	0	1	3	0	0	0	2	2	4	2	0	0	0	0	0	0	0	0	0	0	0	1	0	1	1	3	0	0	2
K22131 2-dehydrotetronate isomerase [EC:5.3.1.35]	7	0	0	0	1	0	4	0	0	0	1	0	1	3	0	0	0	0	0	0	1	4	0	0	1	0	4	1	1	3	0	0	3	0	3	0	0	1	0	0	0	2	0	1	0	0	0	1	0
K14747 benzoylacetate-CoA ligase [EC:6.2.1.-]	0	0	0	0	4	5	0	3	0	0	1	0	0	0	0	0	0	0	2	0	0	1	10	9	0	0	0	3	1	4	0	6	0	0	6	0	2	0	1	1	3	2	0	0	0	0	0	0	1
K14059 integrase	33	56	31	34	39	78	21	52	17	24	39	49	14	30	32	27	77	55	8	16	34	36	61	86	19	7	31	32	90	148	25	21	12	36	115	80	6	3	18	7	15	9	9	4	4	7	7	8	8
K13330 dTDP-4-amino-2,3,4,6-tetradeoxy-D-glucose N,N-dimethyltransferase [EC:2.1.1.324]	0	0	0	0	0	0	0	0	0	0	0	0	0	0	0	0	0	0	0	0	0	0	0	0	0	0	0	0	0	0	0	0	0	0	0	0	0	0	0	1	0	0	0	0	0	0	0	0	0
K07718 two-component system, sensor histidine kinase YesM [EC:2.7.13.3]	0	0	0	0	0	0	1	1	1	0	0	0	0	0	0	0	15	0	0	0	4	0	3	1	0	0	0	0	1	8	0	0	4	0	0	0	0	0	1	0	0	2	0	1	0	0	1	2	1
K17742 sorbose reductase [EC:1.1.1.289]	6	12	3	6	1	1	7	1	2	3	6	1	2	7	6	11	5	0	4	5	6	5	30	2	16	5	6	3	7	0	7	3	4	3	9	0	0	2	1	0	3	1	1	1	0	1	1	1	0
K16129 microcystin synthetase protein McyE	1	2	1	1	0	4	2	2	1	1	1	6	2	2	0	5	6	2	0	3	4	3	1	0	0	1	1	0	1	25	5	2	2	0	13	0	23	6	2	3	3	0	1	0	0	0	15	3	4
K11180 dissimilatory sulfite reductase alpha subunit [EC:1.8.99.5]	70	138	174	91	137	161	77	121	134	155	139	125	69	158	129	111	278	185	237	173	202	194	287	131	482	182	156	151	313	359	387	95	140	111	187	128	774	270	167	80	209	85	93	12	21	11	332	193	217
K10979 DNA end-binding protein Ku	8	6	0	0	0	0	1	4	0	1	0	6	6	1	2	9	0	4	0	0	0	0	3	0	0	0	9	0	6	1	0	0	0	2	1	0	0	3	2	2	2	1	0	0	2	0	0	3	1
K01097 N-acylneuraminate-9-phosphatase [EC:3.1.3.29]	0	0	0	0	0	0	0	0	0	0	0	0	2	0	0	0	0	0	0	0	0	0	0	0	0	0	0	0	0	0	0	0	0	0	0	0	0	0	0	0	0	0	0	0	0	0	0	0	0
K02226 alpha-ribazole phosphatase [EC:3.1.3.73]	12	2	4	10	6	7	7	15	6	5	1	6	9	10	3	0	1	13	0	1	1	5	11	7	9	4	7	2	11	27	10	1	8	6	18	5	0	2	6	2	8	0	1	4	1	3	1	3	0
K02705 photosystem II CP43 chlorophyll apoprotein	2	0	0	0	0	0	5	1	0	0	0	0	4	4	0	0	0	0	0	0	9	10	0	2	13	3	0	1	1	0	47	4	0	0	0	0	80	20	15	10	2	3	0	1	1	0	21	10	9
K19072 oxalate oxidoreductase subunit delta [EC:1.2.7.10]	0	0	0	0	0	0	0	0	0	0	0	0	0	0	0	0	0	0	0	0	0	0	0	0	0	0	1	0	0	0	0	0	0	0	0	0	0	0	0	0	0	0	0	0	0	0	0	0	0
K22343 dimethylamine monooxygenase subunit B [EC:1.14.13.238]	0	0	0	0	0	0	0	0	0	0	0	0	0	0	0	0	0	0	0	0	0	0	0	0	0	0	0	0	0	0	0	0	0	0	0	0	0	0	0	0	0	0	0	0	0	0	0	0	0
K17228 dimethylsulfone monooxygenase [EC:1.14.14.35]	7	0	1	5	6	7	14	3	0	1	2	16	8	4	1	0	0	15	0	2	2	0	8	17	0	0	2	9	21	36	0	0	0	10	11	27	2	1	3	0	1	0	4	2	0	5	0	3	1
K16209 lactose/raffinose/galactose permease	0	0	0	0	0	0	0	0	0	0	0	0	0	0	0	0	0	0	0	0	0	0	0	0	0	0	0	0	0	0	0	0	0	0	0	0	0	0	0	0	0	0	0	0	0	0	0	0	0
K07250 4-aminobutyrate aminotransferase / (S)-3-amino-2-methylpropionate transaminase / 5-aminovalerate transaminase [EC:2.6.1.19 2.6.1.22 2.6.1.48]	22	30	21	23	28	46	20	26	26	16	50	37	16	16	20	13	26	45	24	21	40	32	99	79	17	5	22	19	90	100	25	7	21	37	56	34	23	14	21	18	32	28	16	26	30	27	20	30	17
K10028 D-dopachrome decarboxylase [EC:4.1.1.84]	0	0	0	0	0	0	0	0	0	0	0	0	0	0	0	0	0	0	0	0	0	0	0	0	0	0	0	0	0	0	0	0	0	0	0	0	0	0	0	0	0	0	0	0	0	0	0	0	0
K09882 cobaltochelatase CobS [EC:6.6.1.2]	8	5	0	0	0	0	2	5	0	0	0	0	23	5	0	0	0	0	1	0	1	0	0	0	2	0	0	0	0	0	2	0	0	0	0	0	0	1	0	1	0	0	0	0	0	0	2	4	0
K12630 puromycin biosynthesis protein Pur4 [EC:2.-.-.-]	1	0	1	1	0	4	1	0	0	1	1	0	0	2	0	0	0	2	0	0	6	1	8	9	0	0	0	1	3	5	0	0	4	12	11	9	0	0	1	1	1	0	3	1	2	1	1	0	0
K03810 virulence factor	9	12	4	6	17	21	4	7	5	2	4	19	6	6	4	2	0	11	13	7	14	17	44	45	7	11	11	6	43	53	13	4	7	19	52	21	8	5	7	5	9	9	12	7	4	7	0	5	4
K11605 manganese/iron transport system permease protein	0	1	0	0	0	0	0	0	0	0	0	0	0	0	0	0	0	0	0	0	0	0	0	0	0	0	0	0	0	0	0	0	0	0	0	0	0	0	0	0	0	0	0	0	0	0	0	0	0
K02010 iron(III) transport system ATP-binding protein [EC:7.2.2.7]	46	26	12	19	20	18	19	24	10	11	23	36	17	30	10	16	21	16	14	22	25	16	52	34	18	11	11	21	51	46	35	10	12	21	45	59	10	2	7	3	9	9	8	14	8	9	7	8	5
K03388 heterodisulfide reductase subunit A2 [EC:1.8.7.3 1.8.98.4 1.8.98.5 1.8.98.6]	222	410	432	342	974	1779	211	336	464	394	1067	1457	138	381	454	431	1195	1840	1121	1114	1712	2091	3757	2998	1206	1120	1316	1454	3150	4818	1013	1131	1282	2182	3742	2778	964	475	607	341	916	505	583	254	331	485	589	703	433
K04056 type III secretion protein O	0	0	0	0	0	0	0	0	0	0	0	0	0	0	0	0	0	0	0	0	0	0	0	0	0	0	0	0	0	0	0	0	0	0	0	0	0	1	0	0	0	0	0	0	0	0	0	0	0
K14058 tRNA 2-thiocytidine biosynthesis protein TtcA	16	5	4	2	2	3	16	5	4	3	6	9	15	11	1	0	18	2	6	4	7	3	4	0	13	4	6	1	7	16	12	1	7	4	1	7	15	7	8	2	6	2	5	0	2	2	5	4	8
K03518 aerobic carbon-monoxide dehydrogenase small subunit [EC:1.2.5.3]	70	51	28	20	47	33	40	21	30	19	39	17	53	34	14	17	82	16	16	30	32	37	91	79	15	16	20	35	86	118	19	3	7	51	47	109	16	18	16	4	14	7	16	9	19	22	7	17	5
K12188 ESCRT-II complex subunit VPS22	0	0	0	0	0	0	0	0	0	0	0	0	0	0	0	0	0	0	0	3	4	0	4	6	0	0	0	4	0	0	0	0	0	4	0	0	0	0	0	0	0	3	1	1	0	1	2	1	4
K11356 two-component system, sensor histidine kinase and response regulator [EC:2.7.13.3]	1	0	1	3	0	0	0	2	1	0	0	2	0	3	0	0	0	0	0	2	1	0	4	0	3	1	0	0	0	0	2	0	0	1	0	0	15	3	2	2	0	0	1	0	0	0	3	3	2
K08597 sentrin-specific protease 8 [EC:3.4.22.68]	0	0	0	0	0	0	0	1	0	0	0	0	0	0	0	0	0	0	0	0	0	0	0	0	0	0	0	0	0	0	0	0	0	0	0	0	0	0	0	0	0	0	0	0	3	0	0	0	0
K15970 8-O-methyltransferase	2	4	6	0	9	1	4	5	4	1	1	2	4	2	4	5	0	5	3	0	5	2	18	4	1	2	3	5	3	9	5	3	10	5	2	0	4	0	0	0	2	1	0	0	0	0	0	2	0
K02422 flagellar secretion chaperone FliS	11	12	10	9	20	11	7	8	12	7	14	12	12	13	5	0	4	3	13	10	13	16	72	50	34	6	12	13	51	87	42	2	14	24	97	58	30	8	8	3	12	15	9	9	3	11	11	4	7
K03486 GntR family transcriptional regulator, trehalose operon transcriptional repressor	0	0	0	0	0	0	0	0	0	0	0	0	0	0	0	0	0	0	0	0	0	0	0	0	0	0	0	0	0	0	0	0	0	0	0	0	0	0	0	0	0	0	0	0	0	0	0	0	0
K01992 ABC-2 type transport system permease protein	121	121	87	60	118	249	69	78	99	90	155	213	102	95	105	87	188	212	63	76	113	132	354	473	110	60	96	132	361	818	103	56	132	160	366	392	68	62	78	45	108	74	91	71	80	75	54	82	76
K14215 trans,polycis-decaprenyl diphosphate synthase [EC:2.5.1.86]	0	0	0	0	0	0	0	0	0	0	0	0	0	0	0	0	0	0	0	0	0	0	0	0	0	0	0	0	0	0	0	0	0	0	0	0	0	0	0	0	0	0	0	0	0	0	0	0	0
K00622 arylamine N-acetyltransferase [EC:2.3.1.5]	5	0	1	0	0	0	0	2	1	0	0	0	0	0	0	0	0	0	0	0	0	0	0	0	0	0	0	0	1	0	0	0	0	0	0	0	0	0	0	0	0	0	0	0	0	0	0	0	0
K23513 riboflavin transport system ATP-binding protein	0	0	0	0	0	0	0	0	0	0	0	0	0	0	0	0	0	0	0	0	0	0	0	0	0	0	0	0	0	0	0	0	0	0	0	0	0	0	0	0	0	0	0	0	0	0	0	0	0
K18534 MPBQ/MSBQ methyltransferase [EC:2.1.1.295]	7	5	0	2	2	0	1	0	3	0	4	0	1	6	0	0	0	5	0	0	3	4	4	2	0	0	0	0	0	3	6	0	0	3	0	0	15	2	0	1	1	0	0	2	0	3	8	2	2
K19616 two-component system, sensor histidine kinase and response regulator FitF [EC:2.7.13.3]	4	4	1	1	0	0	2	1	1	0	2	0	2	0	0	0	0	0	1	0	0	3	1	0	3	1	0	0	0	0	1	0	0	0	9	0	4	1	0	0	0	2	0	1	0	0	0	1	1
K07498 putative transposase	40	14	7	2	4	3	13	20	2	4	3	5	17	13	7	5	6	3	6	1	6	2	10	0	5	1	4	6	5	10	7	2	5	1	19	0	0	3	3	0	1	1	1	2	1	1	9	5	2
K19690 osomolarity two-component system, sensor histidine kinase CHK1 [EC:2.7.13.3]	7	4	3	2	2	0	2	2	4	4	1	6	6	3	0	0	0	6	4	0	6	3	0	0	3	0	2	0	2	0	0	2	0	1	0	0	32	4	1	1	0	0	0	2	0	0	8	6	1
K00928 aspartate kinase [EC:2.7.2.4]	55	52	26	44	61	73	41	34	32	29	41	51	31	53	41	6	88	63	28	38	30	61	164	210	91	35	28	38	178	232	61	18	47	88	186	213	146	38	30	20	45	36	45	26	26	43	75	30	29
K07141 molybdenum cofactor cytidylyltransferase [EC:2.7.7.76]	10	12	7	1	9	3	12	5	0	7	10	3	12	7	7	0	0	9	8	1	5	10	21	13	10	0	6	1	8	25	3	2	6	11	8	3	10	5	2	6	7	3	2	6	2	2	6	0	2
K05342 alpha,alpha-trehalose phosphorylase [EC:2.4.1.64]	19	10	4	7	9	4	6	5	10	5	4	1	11	3	14	4	3	2	1	3	6	10	9	1	4	1	3	1	13	7	3	1	4	1	8	0	0	0	1	1	3	0	0	0	3	0	1	3	1
K07674 two-component system, NarL family, nitrate/nitrite sensor histidine kinase NarQ [EC:2.7.13.3]	0	0	0	0	0	0	1	0	0	0	0	0	0	0	0	0	0	0	0	0	0	0	0	0	0	0	0	0	0	0	0	0	0	0	0	0	0	0	0	0	0	0	0	0	0	0	0	0	0
K01447 N-acetylmuramoyl-L-alanine amidase [EC:3.5.1.28]	6	9	3	1	2	4	3	4	0	5	2	0	7	4	3	1	0	4	3	2	6	9	7	8	8	8	4	4	3	11	8	0	3	9	1	0	8	0	0	2	1	0	2	0	1	2	10	3	2
K18104 ATP-binding cassette, subfamily B, bacterial AbcA/BmrA [EC:7.6.2.2]	0	0	0	0	0	0	3	0	0	0	0	0	2	0	0	0	0	0	0	0	0	0	0	0	0	2	0	0	0	1	0	0	1	0	0	0	3	0	3	0	0	2	1	1	0	1	0	0	0
K19265 L-glyceraldehyde 3-phosphate reductase [EC:1.1.1.-]	54	58	82	66	80	152	31	41	70	50	129	146	47	59	65	76	86	182	13	28	44	85	336	314	28	29	41	69	173	597	32	22	67	97	186	217	12	11	38	13	53	48	57	37	64	95	15	21	23
K06382 stage II sporulation protein E [EC:3.1.3.16]	0	0	0	0	0	0	0	0	0	0	0	0	0	0	0	0	0	0	0	0	0	0	0	0	0	0	0	0	0	0	0	0	0	0	0	0	0	0	0	0	0	0	0	0	0	0	0	0	0
K02389 flagellar basal-body rod modification protein FlgD	12	18	10	8	2	2	5	15	19	6	18	8	9	5	4	7	15	11	10	4	15	8	44	37	10	7	6	5	21	49	16	1	12	11	32	39	19	11	9	5	9	5	12	3	10	9	9	8	7
K04796 small nuclear ribonucleoprotein	27	7	2	5	7	13	12	7	5	2	14	23	14	9	9	8	12	21	2	2	5	6	45	29	1	5	7	15	26	45	2	0	1	14	39	28	0	6	3	9	21	8	9	13	10	12	2	7	3
K02342 DNA polymerase III subunit epsilon [EC:2.7.7.7]	21	28	12	10	10	7	20	32	13	12	26	7	13	25	18	6	15	12	3	13	15	28	37	27	18	10	24	15	30	45	34	2	17	18	51	65	21	24	24	8	18	14	11	7	2	3	18	15	13
K20495 long-chain fatty acid omega-monooxygenase [EC:1.14.14.80]	0	0	0	0	0	0	0	0	0	0	0	0	0	0	0	0	0	0	0	0	0	0	0	0	0	0	0	0	0	0	0	0	0	0	0	0	0	0	0	0	0	0	0	0	0	0	0	0	0
K21196 2-amino-1-hydroxyethylphosphonate dioxygenase (glycine-forming) [EC:1.13.11.78]	4	0	0	0	0	0	0	0	0	0	0	0	4	0	0	0	0	0	0	0	0	0	0	0	2	0	0	0	0	0	0	0	0	0	0	0	0	0	0	0	1	0	0	0	0	0	0	0	0
K17363 urocanate reductase [EC:1.3.99.33]	2	6	5	0	2	0	1	0	1	0	3	2	2	5	0	1	0	3	2	2	1	5	24	29	0	4	3	3	8	60	10	0	4	4	0	0	1	4	0	1	4	2	2	7	5	5	0	2	1
K02015 iron complex transport system permease protein	6	4	3	2	9	18	9	1	6	2	9	5	4	4	3	1	4	28	9	9	4	7	23	55	4	3	10	6	37	47	4	1	8	16	48	40	5	8	8	5	8	8	8	8	2	5	9	6	6
K06109 Ras-related protein Rab-13	0	0	0	0	0	0	0	0	0	5	1	4	0	0	7	0	0	0	0	3	2	4	10	0	0	0	0	0	1	10	0	0	1	0	18	0	0	0	1	1	3	0	3	1	0	1	0	0	0
K15359 6-hydroxy-3-succinoylpyridine 3-monooxygenase [EC:1.14.13.163]	2	1	0	0	0	0	0	0	0	1	1	0	0	0	0	0	0	0	0	1	0	1	2	0	0	0	1	0	5	0	0	0	0	0	14	0	0	0	0	0	0	0	2	0	0	0	0	0	0
K08303 U32 family peptidase [EC:3.4.-.-]	46	33	11	11	30	31	29	27	31	20	26	48	16	24	21	19	65	38	24	27	21	48	164	223	43	25	27	31	98	314	37	24	24	74	276	176	33	26	25	17	38	25	31	30	28	30	17	24	23
K07448 restriction system protein	19	15	13	11	13	13	6	4	26	9	13	26	8	12	19	8	0	14	8	12	15	17	23	22	6	12	14	13	38	28	8	15	15	15	52	20	3	8	5	3	14	6	8	3	7	10	2	6	10
K02462 general secretion pathway protein M	2	2	3	1	0	3	1	2	1	14	1	1	0	1	0	0	7	4	0	1	1	2	9	9	6	6	2	5	3	43	8	0	2	0	12	0	0	3	1	2	2	0	1	0	1	0	1	1	1
K06188 aquaporin Z	36	21	5	6	6	7	14	18	7	12	3	2	21	20	24	2	13	0	17	4	10	11	16	7	19	4	10	4	20	0	26	14	1	11	13	3	35	11	14	6	6	4	9	5	6	6	12	10	11
K17290 oxidoreductase [EC:1.1.1.-]	0	2	0	2	0	3	0	4	2	1	0	0	1	6	2	2	0	0	0	1	2	2	0	2	0	0	0	0	1	0	3	0	4	0	0	0	2	1	3	1	1	0	0	0	1	0	0	1	1
K13924 two-component system, chemotaxis family, CheB/CheR fusion protein [EC:2.1.1.80 3.1.1.61]	6	15	6	0	14	16	15	9	10	3	7	7	11	8	7	6	14	8	19	10	26	62	24	34	51	16	17	15	43	44	29	10	18	19	7	66	57	15	24	11	24	18	14	9	16	14	24	24	16
K16178 dimethylamine---corrinoid protein Co-methyltransferase [EC:2.1.1.249]	73	100	35	47	33	25	41	99	56	25	42	43	51	78	45	13	6	15	25	12	29	39	74	82	37	32	39	22	95	79	71	17	16	24	64	25	13	4	5	3	13	11	6	8	5	2	10	5	3
K02043 GntR family transcriptional regulator, phosphonate transport system regulatory protein	0	0	0	0	0	0	0	0	0	0	0	1	0	0	0	0	0	0	0	0	0	0	0	0	0	0	0	0	1	3	0	0	0	0	0	0	1	0	0	0	0	0	0	0	0	2	0	0	0
K21757 LysR family transcriptional regulator, benzoate and cis,cis-muconate-responsive activator of ben and cat genes	5	0	3	0	0	0	0	3	0	0	0	2	0	0	0	0	0	3	0	0	0	0	1	0	0	0	3	1	0	0	1	0	0	0	0	2	0	0	0	0	0	0	0	0	0	0	0	0	0
K16169 xanthine permease	2	3	0	0	0	0	0	0	0	0	0	0	0	0	0	0	0	0	0	0	0	0	0	0	0	0	0	0	0	0	0	0	0	0	0	0	0	0	0	0	1	0	0	0	0	0	0	0	0
K09741 KEOPS complex subunit Pcc1	0	0	0	0	0	0	0	0	0	0	0	0	0	0	0	0	0	0	0	0	0	0	2	0	0	0	0	0	0	0	0	0	0	0	0	0	0	1	1	0	0	1	0	0	0	1	0	0	0
K15895 UDP-4-amino-4,6-dideoxy-L-N-acetyl-beta-L-altrosamine transaminase [EC:2.6.1.92]	4	6	1	2	4	11	3	1	3	3	4	5	6	15	8	4	0	13	6	3	6	7	33	20	4	1	16	2	24	31	4	6	5	7	11	43	5	1	2	3	6	2	3	1	1	4	4	3	2
K07942 ADP-ribosylation factor-like protein 1	0	0	0	0	1	2	0	0	0	0	0	3	0	0	3	0	0	4	0	0	2	0	13	7	0	3	2	2	3	0	0	0	4	2	0	11	0	0	0	0	0	0	2	0	0	0	0	0	0
K19242 LysR family transcriptional regulator, repressor for citA	0	0	0	0	0	0	0	0	0	0	0	0	0	0	0	0	0	0	0	0	0	0	0	0	0	0	0	0	0	0	0	0	0	0	0	0	0	0	0	0	0	0	0	0	0	0	0	1	0
K14571 ribosome biogenesis ATPase	0	0	0	0	0	0	0	0	0	0	0	0	0	0	0	0	0	0	0	0	0	0	0	0	0	0	0	0	0	0	0	0	0	0	0	0	0	0	0	0	0	0	0	0	0	0	0	0	0
K07795 putative tricarboxylic transport membrane protein	355	360	223	170	203	155	223	259	224	162	158	103	241	338	168	107	170	117	89	104	139	191	507	732	159	104	151	154	435	1207	114	80	125	188	499	611	96	60	77	28	97	89	156	223	358	275	58	72	43
K03666 host factor-I protein	53	36	4	8	1	2	23	15	11	7	4	8	43	18	12	20	0	5	18	8	6	5	11	5	26	14	5	7	7	3	19	5	4	0	1	0	14	32	18	5	3	7	21	5	3	5	12	4	16
K02810 sucrose PTS system EIIBCA or EIIBC component [EC:2.7.1.211]	0	0	0	0	0	0	0	0	0	0	0	0	0	0	0	0	0	0	0	0	0	0	0	0	0	0	0	0	0	0	0	0	0	0	0	0	0	2	1	1	0	0	0	0	0	0	1	8	0
K02686 primosomal replication protein N	4	0	0	0	0	0	0	0	1	0	0	0	1	8	0	0	0	0	0	0	0	0	0	0	1	0	0	0	0	0	0	0	0	0	0	0	0	2	0	2	0	0	1	0	0	0	0	0	0
K01154 type I restriction enzyme, S subunit [EC:3.1.21.3]	25	25	12	16	25	39	11	24	23	10	19	36	19	18	10	12	12	30	22	12	19	25	67	84	25	10	11	24	37	131	39	8	7	29	125	69	28	14	16	11	34	13	31	12	22	30	16	19	13
K21480 heme oxygenase (biliverdin-producing, ferredoxin) [EC:1.14.15.20]	1	0	1	0	0	0	3	0	3	0	0	0	0	0	0	0	0	0	4	0	2	2	0	0	10	2	0	0	1	0	12	0	0	0	0	0	2	0	0	0	1	0	0	1	0	0	1	1	0
K02488 two-component system, cell cycle response regulator [EC:2.7.7.65]	29	36	15	9	26	10	27	25	18	25	20	29	31	27	22	13	14	30	27	34	28	26	58	70	54	25	27	21	70	92	57	30	19	37	31	52	77	27	14	19	14	14	16	22	11	15	30	25	14
K16553 succinoglycan exporter	0	0	0	0	0	0	0	0	0	0	1	0	0	0	0	0	0	0	0	0	0	0	0	0	0	0	0	0	0	0	0	0	0	0	0	0	0	0	0	0	0	0	0	0	0	0	0	0	0
K13313 dTDP-4-dehydro-6-deoxy-alpha-D-gulose 4-ketoreductase [EC:1.1.1.364]	0	0	0	1	0	0	0	4	0	0	0	0	3	4	0	0	0	4	0	0	1	0	0	0	0	0	0	0	0	3	0	0	0	0	0	0	1	0	0	0	1	0	0	0	0	0	1	0	0
K18700 fluoroacetyl-CoA thioesterase [EC:3.1.2.29]	3	7	0	1	3	7	7	8	1	4	2	7	9	7	2	1	11	2	7	0	3	7	9	5	4	0	6	1	4	8	8	3	0	4	1	9	0	3	1	1	1	2	0	4	6	6	0	2	3
K01761 methionine-gamma-lyase [EC:4.4.1.11]	31	17	15	8	19	26	14	26	24	8	31	37	18	41	8	12	22	31	25	15	23	37	62	73	21	17	13	26	42	88	23	23	28	28	26	21	18	19	25	8	26	13	16	10	9	14	16	26	26
K03198 type IV secretion system protein VirB3	0	0	0	0	0	0	0	0	0	0	0	0	0	0	0	0	0	0	0	0	0	0	0	0	0	0	0	0	0	0	0	0	0	0	0	0	0	0	0	0	0	0	0	0	0	0	0	0	0
K12978 lipid A 4'-phosphatase [EC:3.1.3.-]	0	0	1	0	0	0	1	0	0	0	0	0	0	0	0	0	0	0	0	0	0	3	0	0	0	0	1	0	4	0	2	2	0	0	2	0	0	0	0	0	0	0	0	0	2	0	0	0	0
K00348 Na+-transporting NADH:ubiquinone oxidoreductase subunit C [EC:7.2.1.1]	33	8	12	8	13	21	14	25	14	17	18	1	17	29	28	9	0	5	8	8	6	11	26	22	25	7	6	10	25	18	15	6	7	22	2	27	11	2	9	1	9	5	6	2	4	2	8	8	5
K15303 aflatoxin B1 aldehyde reductase	1	3	7	0	2	0	1	0	1	0	5	1	0	0	0	0	0	3	0	0	1	1	3	0	1	0	1	2	0	4	1	0	0	0	0	0	0	1	1	0	1	1	0	0	0	0	0	3	0
K00093 methanol dehydrogenase [EC:1.1.1.244]	1	0	6	0	2	1	5	1	2	2	2	1	0	2	1	0	0	2	0	1	3	3	21	6	1	2	1	0	9	16	3	0	2	3	4	7	2	0	2	0	0	2	0	0	0	1	0	1	0
K14082 [methyl-Co(III) methylamine-specific corrinoid protein]:coenzyme M methyltransferase [EC:2.1.1.247]	15	17	5	3	5	3	11	15	12	1	4	10	17	14	7	0	0	12	14	19	3	4	92	72	6	6	17	19	59	110	9	7	8	17	79	123	52	26	28	19	19	6	5	1	4	6	20	20	17
K07641 two-component system, OmpR family, sensor histidine kinase CreC [EC:2.7.13.3]	1	2	2	3	0	5	0	0	0	0	4	1	0	0	0	0	0	0	0	0	0	1	0	0	1	0	0	1	1	0	2	3	1	0	4	0	1	0	0	1	2	0	0	0	0	0	1	1	0
K13794 LysR family transcriptional regulator, regulatory protein for tcuABC	0	0	0	0	0	0	0	0	0	0	0	0	0	0	0	0	0	0	0	0	0	0	0	0	0	0	0	0	0	0	0	0	0	0	0	0	0	0	0	0	0	0	0	0	0	0	0	0	0
K04760 transcription elongation factor GreB	0	5	0	0	0	0	5	3	0	1	1	0	4	1	2	0	0	0	0	0	0	0	0	0	0	0	0	0	1	3	3	0	0	0	0	0	1	2	0	0	0	0	0	1	0	0	0	2	1
K02565 N-acetylglucosamine repressor	5	3	7	4	2	9	0	5	4	2	1	4	3	1	5	1	0	4	8	1	4	1	30	4	0	2	1	0	7	30	4	0	2	12	0	36	0	4	0	1	7	5	8	5	9	9	2	2	3
K23061 hydroxyproline transporter system substrate-binding protein	1	0	0	0	0	0	0	0	0	0	0	0	0	0	0	0	0	0	2	0	0	0	0	0	0	0	0	0	0	0	0	0	0	0	0	0	0	1	0	0	0	0	0	0	0	0	0	0	0
K07456 DNA mismatch repair protein MutS2	25	21	16	12	18	55	9	14	11	17	17	24	22	11	8	6	53	33	4	12	20	19	74	148	16	7	32	47	119	165	9	5	24	45	145	150	17	15	11	10	34	29	24	16	26	12	3	17	12
K09913 purine/pyrimidine-nucleoside phosphorylase [EC:2.4.2.1 2.4.2.2]	0	0	0	4	0	0	0	1	0	0	0	1	0	1	0	0	0	0	3	0	6	0	1	2	5	0	0	0	8	6	1	0	3	1	4	7	7	5	6	1	0	0	1	2	3	0	6	5	3
K01366 cathepsin H [EC:3.4.22.16]	0	0	0	0	0	1	0	0	0	0	0	2	0	0	0	0	0	0	4	0	2	0	0	4	0	1	0	1	5	6	6	0	0	1	0	1	0	0	0	0	3	1	1	0	0	0	0	0	0
K21828 CRP/FNR family transcriptional regulator, arginine deiminase pathway regulator	0	0	0	0	0	0	0	0	0	0	0	0	0	0	0	0	0	0	0	0	0	0	0	0	0	0	0	0	0	0	0	0	0	0	0	0	0	0	0	0	0	0	0	0	1	0	0	0	0
K07248 lactaldehyde dehydrogenase / glycolaldehyde dehydrogenase [EC:1.2.1.22 1.2.1.21]	2	2	0	0	0	1	8	7	0	0	0	2	5	7	2	0	0	1	3	2	2	0	0	0	0	0	0	4	4	5	8	0	0	2	0	5	1	0	0	0	1	1	0	0	2	0	0	1	1
K06901 adenine/guanine/hypoxanthine permease	7	9	8	8	11	8	9	10	17	13	14	9	9	16	11	11	13	11	15	10	13	23	39	38	9	11	17	6	45	52	27	6	18	7	23	33	14	15	3	9	11	12	18	16	8	6	8	9	12
K01087 trehalose 6-phosphate phosphatase [EC:3.1.3.12]	10	3	4	7	9	2	4	1	4	1	2	1	1	14	3	2	1	1	1	5	5	7	9	15	7	8	12	4	13	38	3	1	2	5	10	20	1	3	2	0	4	5	3	3	4	4	5	2	4
K24866 precorrin-2 dehydrogenase [EC:1.3.1.76]	0	1	2	0	0	0	1	0	0	0	0	0	0	3	0	3	0	0	0	0	0	0	0	0	0	0	1	2	5	0	1	0	0	0	5	0	0	2	0	0	0	0	2	0	0	0	0	0	3
K01646 citrate lyase subunit gamma (acyl carrier protein)	0	2	0	0	0	0	0	0	0	0	0	0	0	0	0	0	0	0	0	0	0	0	0	0	0	0	0	0	0	0	1	0	0	0	0	0	0	0	0	0	0	0	0	0	0	0	0	0	0
K10007 glutamate transport system permease protein	0	0	0	0	0	0	0	0	0	0	0	0	0	0	0	0	0	0	0	0	0	0	0	0	0	0	0	0	0	0	0	0	0	0	0	0	0	0	0	0	0	0	0	0	0	0	0	0	0
K06218 mRNA interferase RelE/StbE	12	25	10	9	13	34	7	12	11	3	11	17	5	6	3	1	0	23	18	2	14	12	64	87	15	4	24	16	32	60	15	17	16	29	40	66	18	17	16	8	19	8	5	10	9	9	13	18	12
K07792 anaerobic C4-dicarboxylate transporter DcuB	0	1	0	0	0	0	0	1	0	0	0	0	0	0	0	0	0	0	0	0	0	0	0	0	0	0	0	0	0	0	1	0	0	0	0	0	0	0	0	0	0	0	0	0	0	0	1	0	0
K25158 ABC-2 type transport system ATP-binding protein	0	0	0	0	0	0	0	1	0	0	0	0	0	0	0	0	0	0	0	0	0	0	0	0	0	0	0	0	0	0	0	0	0	0	0	0	0	0	0	0	0	0	0	0	0	0	0	0	0
K07999 matrix metalloproteinase-20 (enamelysin) [EC:3.4.24.-]	0	0	0	0	0	2	0	0	0	0	0	0	0	0	0	0	0	0	0	0	0	0	0	0	0	0	0	0	3	0	0	0	0	0	0	0	0	0	0	0	0	0	0	0	0	0	0	0	0
K01310 chymotrypsin [EC:3.4.21.1]	0	0	1	0	0	0	0	0	0	0	0	0	0	0	0	0	0	0	0	1	0	0	2	0	0	0	0	0	0	0	0	0	0	0	0	0	0	0	0	0	0	1	0	0	0	0	0	0	0
K00873 pyruvate kinase [EC:2.7.1.40]	58	70	39	40	53	58	58	57	45	39	30	50	69	70	45	38	95	56	26	25	59	79	138	132	74	25	32	56	92	221	55	30	38	58	143	137	54	49	45	39	52	38	89	47	38	50	44	38	49
K13926 ribosome-dependent ATPase	0	0	0	0	0	0	0	0	0	0	0	2	0	0	0	0	0	4	1	0	1	4	4	0	1	2	1	2	0	0	4	0	3	4	0	0	0	0	0	0	1	0	1	0	0	2	0	0	0
K08986 putative membrane protein	0	0	0	0	0	0	0	0	0	0	0	0	0	0	0	0	0	0	0	0	0	0	0	0	0	0	0	1	0	0	0	0	0	0	0	0	0	0	0	0	0	0	0	0	0	0	0	0	0
K08738 cytochrome c	165	24	10	10	13	4	30	23	20	8	7	3	65	37	5	1	22	10	49	25	22	24	39	18	115	19	25	8	81	53	181	20	28	4	12	7	205	54	36	10	11	11	18	9	10	12	78	39	29
K01683 D-arabinonate dehydratase [EC:4.2.1.5]	14	11	2	9	6	7	12	11	8	7	22	8	11	5	3	10	3	14	1	2	17	14	49	65	4	5	13	13	27	40	5	3	17	16	24	14	1	3	8	6	6	2	7	6	4	10	3	4	6
K20386 ATP-binding cassette, subfamily B, bacterial CylB	0	0	0	0	0	0	0	0	0	0	0	1	0	0	0	0	0	0	0	0	0	0	0	0	0	0	0	0	0	0	0	0	0	0	0	0	0	0	0	0	0	0	0	0	0	0	0	0	0
K13627 solute carrier family 12 (potassium/chloride transporter), member 7	0	0	1	0	0	0	0	0	0	0	0	1	0	0	0	0	2	0	0	3	0	7	0	0	0	0	0	0	0	0	0	0	0	5	0	0	0	1	0	0	0	1	0	0	0	0	0	0	0
K04763 integrase/recombinase XerD	99	116	54	66	68	128	95	97	89	63	81	101	59	98	76	55	99	92	28	53	79	124	297	250	88	53	74	93	221	496	66	36	74	113	329	212	32	38	52	32	49	33	63	34	52	50	26	50	48
K23976 L-aspartate semialdehyde sulfurtransferase ferredoxin	4	0	0	3	4	3	0	5	0	1	4	2	1	1	0	0	0	2	5	5	0	1	2	2	0	0	2	2	1	4	3	1	0	0	9	5	0	0	2	0	0	1	1	3	1	2	0	0	0
K10700 ethylbenzene hydroxylase subunit alpha [EC:1.17.99.2]	7	16	5	4	2	3	13	10	2	2	6	7	3	20	3	0	0	4	0	0	4	0	0	2	0	2	0	1	5	0	3	2	0	1	2	1	1	1	2	0	0	0	0	0	0	0	0	0	0
K07374 tubulin alpha	0	0	0	0	0	0	0	0	0	0	0	0	0	0	0	0	0	0	0	0	0	0	0	0	0	0	0	0	0	0	0	0	0	0	0	0	8	0	0	0	0	0	0	0	0	0	2	0	0
K19776 GntR family transcriptional regulator, galactonate operon transcriptional repressor	0	2	0	0	0	0	0	0	0	0	0	0	0	0	2	0	0	0	0	0	0	0	0	0	1	0	0	1	0	0	0	0	0	0	0	0	0	0	0	0	0	1	0	0	0	0	0	0	0
K17869 NADH oxidase (H2O-forming) [EC:1.6.3.4]	0	0	0	0	0	0	0	0	0	0	0	0	0	0	0	0	0	0	0	0	0	0	0	0	0	0	0	0	0	0	0	0	0	0	0	0	0	0	0	0	0	0	0	0	0	0	0	0	0
K01214 isoamylase [EC:3.2.1.68]	45	42	15	12	14	9	39	32	20	4	14	11	48	44	13	21	26	6	14	16	8	20	50	27	20	15	17	28	28	40	9	6	20	30	21	63	67	32	15	18	23	23	23	15	9	8	53	36	32
K19597 Au+-exporting ATPase [EC:3.6.1.-]	1	3	0	0	0	0	0	1	2	0	1	0	0	3	0	0	0	0	1	0	0	0	0	0	0	0	0	1	0	0	0	0	0	0	0	0	0	0	0	0	1	0	1	1	1	0	0	0	1
K23983 amicoumacin kinase [EC:2.7.1.230]	2	0	0	0	0	3	0	0	2	0	0	0	0	0	0	0	0	0	0	0	0	0	0	0	1	0	0	0	1	0	0	0	0	0	0	0	0	0	0	0	0	0	1	0	0	0	0	0	0
K14519 NADP-dependent aldehyde dehydrogenase [EC:1.2.1.4]	0	0	0	0	0	0	0	0	0	0	0	0	0	0	0	0	0	0	0	0	3	0	0	0	0	0	0	0	0	0	0	0	0	0	0	0	0	0	0	0	0	0	0	0	0	0	0	0	0
K04786 yersiniabactin nonribosomal peptide/polyketide synthase	0	0	0	0	0	5	0	0	0	0	0	0	1	0	0	0	3	1	0	0	0	0	0	1	0	0	0	0	0	9	0	0	0	0	0	0	1	0	2	0	0	0	0	0	0	0	0	1	0
K08225 MFS transporter, ENTS family, enterobactin (siderophore) exporter	4	1	0	1	3	5	0	2	1	0	0	3	3	7	4	0	0	0	1	0	0	1	3	0	1	2	2	4	1	1	1	0	1	0	0	0	0	2	1	0	1	2	1	0	2	1	0	0	1
K08097 phosphosulfolactate synthase [EC:4.4.1.19]	12	2	3	0	1	12	3	3	2	1	3	12	10	2	0	14	0	1	6	1	0	8	30	25	6	2	1	0	6	24	5	2	3	0	26	11	0	3	3	0	4	3	6	6	2	12	0	2	2
K01815 4-deoxy-L-threo-5-hexosulose-uronate ketol-isomerase [EC:5.3.1.17]	1	7	10	5	3	4	4	3	4	3	5	0	0	3	6	8	7	3	4	3	10	11	42	26	6	6	5	9	33	81	16	3	15	2	44	67	3	3	1	5	3	3	6	5	6	7	2	5	3
K06997 PLP dependent protein	16	10	8	19	11	15	29	11	13	12	13	34	23	24	15	6	27	17	10	17	12	7	91	42	27	17	19	15	69	79	22	4	16	32	73	75	33	14	14	4	14	11	17	15	17	25	18	12	7
K06164 alpha-D-ribose 1-methylphosphonate 5-triphosphate synthase subunit PhnI [EC:2.7.8.37]	0	0	0	0	0	0	0	0	0	0	0	0	0	3	0	2	0	2	0	0	0	0	0	0	0	0	0	0	0	0	0	0	0	0	0	0	0	0	0	0	0	0	0	0	0	0	0	1	0
K01451 hippurate hydrolase [EC:3.5.1.32]	12	9	10	4	6	2	5	8	5	12	4	6	16	11	11	0	8	5	7	3	4	4	19	7	9	3	6	6	9	12	14	4	1	4	4	6	4	3	8	2	2	1	1	2	0	1	6	5	6
K15658 arthrofactin-type cyclic lipopeptide synthetase A	0	0	0	0	0	4	0	0	0	0	1	0	1	0	0	0	0	1	0	0	0	0	0	0	1	0	0	0	1	1	0	0	4	0	3	0	1	0	1	0	0	0	0	0	0	0	1	0	0
K19611 ferric enterobactin receptor	0	0	0	0	2	0	0	1	0	0	0	0	0	0	0	0	0	0	0	0	0	0	0	0	0	0	1	0	0	0	3	0	0	0	0	0	0	1	0	1	1	0	0	0	0	0	0	1	1
K21019 diguanylate cyclase [EC:2.7.7.65]	5	5	0	0	1	0	4	3	3	2	1	6	1	3	0	0	0	6	0	2	3	0	4	2	5	9	2	0	4	1	3	0	2	1	0	18	1	1	4	2	3	3	3	9	4	5	1	1	1
K14759 isochorismate synthase / 2-succinyl-5-enolpyruvyl-6-hydroxy-3-cyclohexene-1-carboxylate synthase / 2-succinyl-6-hydroxy-2,4-cyclohexadiene-1-carboxylate synthase / o-succinylbenzoate synthase [EC:5.4.4.2 2.2.1.9 4.2.99.20 4.2.1.113]	0	0	1	0	0	0	6	2	0	1	0	9	0	1	0	0	0	0	0	0	0	0	0	0	0	0	0	1	0	0	0	0	0	0	0	0	0	0	1	0	0	0	0	0	0	0	0	0	0
K09796 periplasmic copper chaperone A	4	1	3	0	0	0	1	1	0	0	0	3	2	1	1	0	0	0	1	3	3	8	4	0	7	2	4	1	4	0	13	0	1	2	0	0	2	6	1	1	1	0	0	0	0	0	1	5	2
K02346 DNA polymerase IV [EC:2.7.7.7]	10	10	7	8	2	22	11	12	11	5	18	15	12	16	4	9	1	10	5	9	14	11	51	29	2	11	7	12	37	95	17	5	9	19	59	55	10	4	14	0	14	4	8	3	5	15	8	7	8
K20268 rhizosphere induced protein	0	0	0	0	0	3	0	0	0	0	0	1	0	0	0	0	0	2	0	0	0	0	2	0	0	0	0	0	0	7	0	0	0	0	0	0	0	0	0	0	0	0	0	1	0	0	0	0	0
K16436 dTDP-3-amino-2,3,6-trideoxy-4-keto-D-glucose/dTDP-3-amino-3,4,6-trideoxy-alpha-D-glucose/dTDP-2,6-dideoxy-D-kanosamine transaminase [EC:2.6.1.- 2.6.1.106]	5	13	13	7	9	9	13	18	5	9	8	6	8	10	19	3	5	10	2	8	14	10	24	36	23	9	6	18	33	35	12	10	7	10	2	0	8	4	1	3	11	7	5	4	7	8	8	11	3
K18304 LuxR family transcriptional regulator, quorum-sensing system regulator LasR	0	0	0	0	0	0	0	0	0	0	0	0	0	0	1	0	0	0	0	0	0	0	0	0	0	0	0	0	0	0	0	0	0	0	0	0	0	0	0	0	0	0	0	0	0	0	0	0	0
K17996 sulfhydrogenase subunit beta (sulfur reductase) [EC:1.12.98.4]	22	28	36	27	31	73	18	35	47	11	28	68	15	24	30	12	44	55	30	30	47	40	82	102	57	27	31	43	104	139	28	26	24	36	112	85	28	16	21	10	22	21	21	20	26	21	24	25	17
K21427 mitomycin 6-O-methyltransferase [EC:2.1.1.316]	0	0	0	0	0	0	0	0	0	0	0	0	0	0	0	0	0	0	0	0	0	0	0	0	0	0	0	0	0	0	1	0	0	0	0	0	0	0	0	0	0	0	0	0	0	0	0	0	0
K12529 putative selenate reductase FAD-binding subunit	3	0	1	1	2	4	0	2	0	0	1	5	1	1	0	4	0	0	0	0	2	0	0	4	0	0	0	1	3	0	6	3	0	2	0	0	1	1	0	0	0	0	0	0	0	0	0	1	1
K12510 tight adherence protein B	21	29	13	13	17	25	27	28	21	18	14	20	30	29	21	16	46	17	16	7	25	16	29	60	22	18	14	12	33	52	20	5	11	29	41	37	4	11	15	5	12	6	8	4	4	9	2	15	11
K02946 small subunit ribosomal protein S10	325	183	47	61	82	146	137	134	102	36	72	92	194	147	90	46	101	143	99	48	88	97	190	186	198	68	63	66	236	303	228	32	90	87	158	216	158	69	132	29	70	46	50	56	45	54	70	95	51
K17842 torulene dioxygenase [EC:1.13.11.59]	0	0	0	0	0	0	0	0	0	0	0	0	0	1	0	0	0	0	0	0	0	0	0	0	1	0	0	0	0	0	0	0	0	0	0	0	0	0	0	0	0	0	0	0	0	0	0	0	0
K17876 pentalenic acid synthase [EC:1.14.15.11]	2	0	0	0	0	0	1	1	0	0	0	0	0	0	0	0	0	0	0	0	0	0	0	0	0	1	0	0	0	0	0	0	0	0	0	0	0	0	0	0	0	0	0	0	0	0	1	0	0
K14611 solute carrier family 23 (nucleobase transporter), member 1	12	32	16	8	19	20	18	19	38	14	18	10	13	30	25	20	13	22	45	16	35	31	52	28	42	32	14	40	69	37	66	37	24	21	40	22	38	28	24	28	32	15	23	15	11	8	30	32	19
K14115 energy-converting hydrogenase B subunit F	0	0	0	0	0	0	0	0	0	0	0	0	0	0	0	0	0	0	0	0	0	0	0	0	0	0	0	0	0	0	0	0	0	0	0	0	0	0	0	0	0	0	0	0	0	0	0	1	0
K13687 arabinofuranosyltransferase [EC:2.4.2.-]	3	0	0	0	1	4	0	0	0	1	0	1	0	1	0	0	0	0	5	0	0	0	0	1	0	0	0	0	1	1	1	0	0	0	0	0	0	1	0	0	1	0	1	1	0	1	0	0	0
K03554 recombination associated protein RdgC	0	1	0	2	0	0	0	2	0	0	0	3	2	2	1	6	0	0	3	2	2	0	0	0	3	0	0	0	1	0	5	0	1	0	0	0	27	3	0	0	1	0	0	1	2	0	5	5	2
K01793 heparosan-N-sulfate-glucuronate 5-epimerase [EC:5.1.3.17]	1	2	0	0	0	5	2	1	0	0	0	1	0	0	0	0	0	0	0	0	0	0	0	8	0	0	0	4	2	0	0	0	0	0	0	0	0	0	1	1	1	1	0	0	0	0	1	0	0
K14347 solute carrier family 10 (sodium/bile acid cotransporter), member 7	0	1	0	0	0	0	0	0	0	0	1	4	0	0	0	0	6	0	0	0	5	0	0	0	2	0	0	3	2	5	0	0	0	1	0	0	1	0	0	1	0	0	0	0	0	0	0	2	0
K04077 chaperonin GroEL	1785	1075	407	413	1037	1561	839	822	565	596	1077	1335	1535	1172	744	565	1508	1851	678	498	795	990	2456	2503	1411	557	632	692	2270	4684	1489	462	757	1082	2526	2443	1526	1114	1363	398	769	604	744	704	816	905	846	863	735
K01571 oxaloacetate decarboxylase (Na+ extruding) subunit alpha [EC:7.2.4.2]	54	57	15	28	47	46	25	30	35	18	17	44	33	36	16	24	12	39	42	30	37	74	89	101	26	24	39	26	126	166	61	17	27	44	108	87	43	15	28	10	24	18	28	15	20	16	21	20	12
K00365 urate oxidase [EC:1.7.3.3]	0	0	0	0	0	0	0	0	0	0	0	0	0	0	0	0	0	0	0	0	0	0	0	0	0	0	0	0	0	0	0	0	0	0	0	0	0	0	0	0	0	0	0	0	0	0	0	1	0
K02732 20S proteasome subunit beta 6 [EC:3.4.25.1]	0	0	0	0	0	0	0	0	0	0	0	0	0	0	0	0	0	0	0	0	0	0	0	1	0	0	0	0	0	0	0	0	0	0	0	0	0	0	0	0	0	0	0	0	0	0	0	0	0
K10774 tyrosine ammonia-lyase [EC:4.3.1.23]	1	0	0	0	0	0	0	0	0	0	0	0	0	0	0	0	0	0	0	0	0	0	0	0	0	0	0	0	0	0	1	0	0	0	0	0	0	0	0	0	0	0	0	0	0	0	0	0	1
K06580 ammonium transporter Rh	0	1	3	3	1	1	1	1	4	10	0	4	1	5	10	15	0	3	6	5	0	10	68	95	3	2	0	2	14	202	6	0	7	2	100	70	1	2	0	2	1	0	2	0	0	1	0	5	2
K11406 histone deacetylase 4/5 [EC:3.5.1.98]	6	5	1	3	3	0	5	10	3	1	2	8	1	2	7	14	20	4	2	1	6	2	7	14	12	6	4	1	13	23	3	5	0	1	15	24	9	2	3	0	3	1	5	3	2	2	2	1	0
K00436 NAD-reducing hydrogenase large subunit [EC:1.12.1.2]	32	41	79	98	130	376	29	43	117	105	188	263	21	34	138	139	240	318	96	78	155	195	531	479	134	91	144	222	365	903	126	71	85	186	450	357	94	86	83	52	128	104	107	62	77	72	85	110	70
K08296 phosphohistidine phosphatase [EC:3.1.3.-]	16	18	9	3	13	5	9	10	6	8	9	11	10	16	8	10	6	20	9	6	15	21	23	17	23	12	11	7	23	30	15	19	5	3	5	12	6	14	8	1	4	5	5	3	2	2	5	7	9
K07214 iron(III)-enterobactin esterase [EC:3.1.1.108]	14	5	3	4	5	5	9	11	8	1	13	1	16	12	6	4	0	9	12	6	12	8	67	29	12	11	11	13	40	62	0	5	5	23	37	15	5	9	12	10	8	6	19	10	9	7	5	6	8
K02873 large subunit ribosomal protein L13e	0	0	0	0	0	0	0	0	1	0	0	0	0	0	0	0	0	0	0	0	0	0	0	3	0	0	0	0	0	0	0	0	0	0	4	0	0	1	0	0	1	0	1	0	0	0	0	0	0
K20986 geranyl diphosphate phosphohydrolase [EC:3.6.1.68]	0	0	3	0	0	0	1	1	0	0	0	0	1	0	0	0	0	0	0	1	1	0	0	0	0	0	0	0	2	4	0	0	0	0	0	0	0	0	0	0	0	0	0	0	0	0	0	0	0
K07130 arylformamidase [EC:3.5.1.9]	25	22	24	20	25	41	22	30	27	18	30	45	11	17	28	14	34	33	3	11	13	38	61	80	11	12	16	25	62	83	16	8	15	23	78	48	8	5	10	5	18	8	9	6	5	9	7	13	6
K03013 DNA-directed RNA polymerases I, II, and III subunit RPABC1	0	4	0	0	0	10	0	2	0	0	3	5	0	2	0	0	0	6	0	0	0	8	19	6	0	1	2	4	9	9	0	0	0	8	12	8	0	0	0	0	0	0	2	3	1	4	1	0	0
K19854 dTDP-3-amino-3,6-dideoxy-alpha-D-glucopyranose transaminase [EC:2.6.1.89]	8	16	8	1	21	10	8	10	2	1	5	10	11	13	8	1	3	16	9	1	4	11	37	21	8	6	4	15	21	38	6	1	14	15	27	34	4	4	1	1	13	5	7	2	6	5	5	11	7
K16567 exopolysaccharide production protein ExoQ	0	0	0	2	0	0	0	0	0	0	0	0	0	0	0	0	0	0	0	0	0	0	0	0	0	1	0	0	0	0	0	0	0	0	0	0	0	0	0	1	0	1	0	0	0	0	0	1	1
K06214 curli production assembly/transport component CsgG	0	0	0	1	2	1	0	0	0	0	6	2	2	2	5	0	0	2	0	1	0	1	21	1	8	2	2	1	7	10	0	1	0	2	14	4	0	0	2	0	1	0	2	0	0	0	0	0	0
K09872 aquaporin PIP	0	0	0	0	0	0	0	0	0	0	0	0	0	0	0	0	0	0	0	0	0	0	0	0	0	0	0	0	0	0	0	0	0	0	0	0	0	0	0	0	0	0	0	0	0	0	0	0	0
K00116 malate dehydrogenase (quinone) [EC:1.1.5.4]	5	0	0	0	3	0	2	2	1	1	2	0	1	0	3	2	0	0	3	0	2	3	5	0	13	4	3	0	6	2	10	1	0	5	0	0	0	1	1	0	0	0	4	0	0	0	0	1	1
K07441 beta-1,4-N-acetylglucosaminyltransferase [EC:2.4.1.141]	0	0	1	0	0	3	0	0	0	0	4	0	0	1	1	0	0	3	0	0	0	2	5	5	0	0	0	0	8	0	0	1	3	0	7	0	0	0	1	1	2	1	0	1	0	2	0	0	1
K04060 type III secretion protein Y	0	0	0	0	0	0	0	0	0	0	0	0	0	0	0	0	0	0	0	0	2	0	0	0	0	0	0	0	0	0	0	0	0	0	0	0	0	0	0	0	0	0	0	0	0	0	0	0	0
K14445 solute carrier family 13 (sodium-dependent dicarboxylate transporter), member 2/3/5	46	24	16	20	34	29	10	15	21	22	34	17	21	19	24	22	29	34	36	31	52	27	99	43	65	25	46	38	77	110	63	35	35	40	48	82	84	23	36	24	123	77	27	14	22	19	33	37	27
K21579 betaine reductase complex component B subunit beta [EC:1.21.4.4]	0	1	0	0	3	2	0	1	0	4	1	0	2	0	1	0	14	6	0	1	0	0	0	8	3	2	4	0	1	0	0	0	2	0	1	0	0	0	2	0	0	0	1	1	0	0	0	0	0
K08161 MFS transporter, DHA1 family, multidrug resistance protein	1	1	2	0	3	1	0	1	0	0	1	0	1	0	1	0	0	1	3	1	0	2	11	2	0	1	2	0	4	8	0	0	0	0	5	0	1	5	3	1	1	0	0	1	1	1	0	2	1
K07038 inner membrane protein	2	1	2	3	0	3	1	1	0	0	0	2	4	9	3	0	0	2	3	4	0	5	0	0	11	6	1	0	10	11	13	3	1	3	0	0	0	4	1	7	4	1	17	3	0	1	2	2	3
K00042 2-hydroxy-3-oxopropionate reductase [EC:1.1.1.60]	25	25	26	22	21	18	22	28	14	20	24	21	24	18	13	13	13	14	9	16	24	35	81	94	11	13	19	18	73	94	15	6	6	32	79	66	5	13	13	4	15	7	10	9	23	15	4	13	7
K20919 sigma-54 dependent transcriptional regulator, positive regulator of biofilm formation	0	1	0	0	0	0	0	0	0	0	0	2	0	0	0	0	0	0	0	0	0	0	0	0	0	0	0	0	0	0	0	0	0	0	0	0	0	0	0	0	0	0	0	0	0	0	0	0	0
K13487 methyl-accepting chemotaxis protein WspA	0	5	1	2	5	3	1	2	2	0	0	0	2	0	2	0	0	2	0	5	0	3	0	0	4	0	0	0	3	0	5	6	2	1	0	1	11	2	0	0	2	0	1	0	0	0	6	1	0
K19178 POLQ-like helicase [EC:5.6.2.4]	0	0	0	0	0	0	0	0	0	0	0	0	0	0	0	0	0	0	0	0	0	0	3	0	0	0	0	0	0	0	0	0	0	0	0	0	0	0	0	0	0	0	0	0	1	0	0	0	1
K10234 alpha-glucoside transport system permease protein	34	21	26	11	18	15	17	19	20	7	18	26	18	17	8	41	2	5	19	8	7	18	24	39	13	16	17	26	21	30	13	12	21	17	1	44	12	0	10	3	4	1	6	8	4	9	5	3	7
K10910 autoinducer 2-binding periplasmic protein LuxP	6	2	2	1	0	6	0	3	5	1	0	2	2	5	2	0	0	8	0	1	1	1	34	9	0	0	2	0	6	11	6	0	0	0	20	12	0	0	0	0	0	0	0	0	0	0	0	0	0
K01481 protein-arginine deiminase [EC:3.5.3.15]	2	0	0	0	0	3	0	0	1	1	0	1	0	3	0	0	0	0	1	0	0	0	0	2	0	0	0	0	1	1	1	0	0	0	0	0	1	0	0	1	0	0	0	0	1	0	0	0	0
K22479 N-acetyltransferase	0	0	0	0	0	0	0	0	0	0	0	0	0	0	0	0	0	0	0	0	0	0	0	0	0	0	0	0	0	0	0	0	0	0	0	0	0	0	0	0	0	0	0	0	0	0	0	0	0
K17741 NADPH-dependent methylglyoxal reductase [EC:1.1.1.283]	1	0	0	0	0	0	0	0	0	0	0	0	0	0	0	0	0	0	0	0	0	0	0	0	0	0	0	0	0	0	0	0	0	0	0	0	0	0	0	0	0	0	0	0	0	0	0	0	0
K10257 acyl-lipid omega-3 desaturase [EC:1.14.19.25 1.14.19.35 1.14.19.36]	0	2	0	0	0	0	0	0	0	0	0	0	0	0	0	0	0	0	0	0	0	3	0	0	0	0	0	0	0	0	0	1	0	0	0	0	5	0	0	1	1	0	0	0	1	0	2	1	1
K06887 uncharacterized protein	32	23	13	12	14	14	20	24	11	18	13	15	24	22	11	11	24	8	11	10	17	27	51	30	12	11	15	13	27	24	7	4	14	17	26	18	4	9	13	2	11	9	5	8	5	9	9	10	8
K18148 release factor H-coupled RctB family protein	0	0	1	0	0	0	0	0	1	0	0	0	1	2	0	0	0	0	0	0	1	0	0	0	1	0	0	1	0	0	0	2	0	0	0	0	0	1	1	1	0	3	0	0	0	0	0	1	0
K23994 solute carrier family 9B (sodium/hydrogen exchanger), member 1/2	0	0	0	0	1	0	0	1	0	1	0	1	0	0	0	0	0	0	0	1	2	2	3	0	0	0	0	2	0	0	1	0	0	0	0	0	3	0	0	0	0	1	0	0	0	0	0	0	1
K23734 lipoyl(octanoyl) transferase [EC:2.3.1.181]	0	0	0	0	0	0	0	0	0	0	0	0	0	0	0	0	0	0	0	0	0	0	0	0	0	0	1	0	0	0	0	0	0	0	0	0	0	0	0	0	0	0	1	0	0	0	0	0	0
K22844 glucosyl-dolichyl phosphate glucuronosyltransferase [EC:2.4.1.356]	1	0	1	0	0	0	0	0	0	0	0	3	0	0	0	0	0	0	0	0	0	0	0	3	0	1	0	0	0	3	1	0	0	0	2	0	1	1	1	0	0	1	0	1	0	0	0	1	1
K11387 arabinosyltransferase C [EC:2.4.2.-]	0	0	0	0	0	0	0	0	0	0	1	0	0	0	0	0	0	0	0	0	0	0	0	0	0	0	0	0	0	0	0	0	0	0	0	0	0	0	0	0	0	0	0	0	0	0	0	0	0
K00216 2,3-dihydro-2,3-dihydroxybenzoate dehydrogenase [EC:1.3.1.28]	2	1	3	0	0	0	3	3	2	1	0	0	2	0	1	0	1	0	0	0	0	0	0	5	0	0	2	0	4	0	0	1	0	5	0	0	0	1	0	0	1	0	1	0	0	0	0	2	0
K20761 thiocyanate hydrolase subunit beta [EC:3.5.5.8]	4	0	0	0	0	0	0	0	0	0	0	0	4	0	0	0	0	0	0	0	0	0	0	0	0	0	0	0	2	0	0	0	0	0	0	0	0	0	0	0	0	0	0	0	0	0	0	0	0
K08686 2-halobenzoate 1,2-dioxygenase large subunit [EC:1.14.12.13]	0	0	0	0	0	0	0	0	0	0	0	0	0	0	0	0	0	0	0	0	0	0	0	0	0	0	0	0	0	0	0	0	0	0	0	0	0	0	0	0	0	0	0	0	0	0	0	0	0
K07403 membrane-bound serine protease (ClpP class)	60	43	43	32	64	85	48	46	49	52	71	84	51	56	42	39	85	88	44	23	64	58	221	258	50	50	50	59	168	364	63	23	81	76	278	219	22	30	35	18	37	28	51	28	41	51	33	22	25
K13652 AraC family transcriptional regulator	4	1	2	1	5	4	2	3	3	1	2	0	1	2	2	0	0	8	2	3	6	6	20	11	1	0	4	7	11	28	8	4	13	7	12	3	2	1	0	1	1	2	2	1	5	5	0	0	3
K05895 precorrin-6A/cobalt-precorrin-6A reductase [EC:1.3.1.54 1.3.1.106]	0	2	0	0	0	0	0	1	0	0	0	0	0	0	1	0	0	0	0	0	0	0	0	0	0	0	0	0	0	0	0	0	0	0	0	0	3	0	0	0	0	0	0	0	0	0	1	0	0
K09008 NADH dehydrogenase [ubiquinone] 1 alpha subcomplex assembly factor 3	0	0	0	0	0	0	1	0	0	0	0	0	0	0	0	0	0	0	1	0	0	0	0	0	0	0	0	0	0	0	0	0	0	0	0	0	0	1	0	0	0	0	0	0	0	2	0	2	0
K00012 UDPglucose 6-dehydrogenase [EC:1.1.1.22]	111	86	56	22	55	58	51	82	47	33	50	48	85	83	89	34	114	53	35	25	69	62	157	161	54	32	49	53	139	291	102	16	55	71	129	123	42	52	46	18	44	35	30	28	24	37	34	44	25
K01777 proline racemase [EC:5.1.1.4]	13	16	6	5	16	14	14	16	10	11	20	10	11	15	9	6	44	24	10	9	19	38	72	46	17	6	12	15	44	36	18	11	4	19	44	36	3	3	9	4	2	5	4	3	3	5	3	9	4
K02589 nitrogen regulatory protein PII 1	0	0	0	0	0	0	1	1	0	0	0	0	1	0	0	0	0	0	0	0	0	0	0	0	0	0	0	0	0	0	0	0	0	0	0	0	0	0	0	0	0	0	0	0	0	0	0	0	0
K16652 decaprenylphospho-beta-D-erythro-pentofuranosid-2-ulose 2-reductase [EC:1.1.1.333]	0	1	2	0	0	0	0	0	3	0	0	1	1	0	2	0	0	1	0	1	3	0	0	0	4	1	0	2	2	0	1	0	3	0	4	0	7	1	2	0	0	0	0	0	0	1	3	0	1
K12306 MFS transporter, FLVCR family, MFS-domain-containing protein 7	0	3	1	0	3	0	1	1	0	0	0	0	0	0	0	1	0	1	0	0	4	2	2	0	4	0	4	1	1	3	2	0	1	1	8	0	0	2	1	0	2	1	1	6	5	3	2	1	1
K08979 putative membrane protein	1	0	0	0	0	3	1	0	0	0	0	3	4	1	0	0	0	4	0	2	0	2	13	9	0	1	0	0	3	0	0	0	0	7	14	5	0	0	1	0	3	2	1	0	4	8	0	0	0
K13308 dTDP-4-amino-4,6-dideoxy-D-glucose transaminase [EC:2.6.1.33]	4	6	1	3	1	3	1	0	3	0	4	3	1	5	1	3	2	2	0	0	1	2	8	0	4	0	3	0	5	0	0	0	3	2	0	0	1	0	0	0	0	2	1	0	0	1	0	1	0
K01341 kexin [EC:3.4.21.61]	1	4	0	0	3	4	1	3	5	5	16	4	0	0	0	0	0	19	0	1	0	2	0	0	1	1	0	0	1	0	1	0	4	1	0	1	2	1	1	4	0	0	4	0	1	0	2	2	0
K19736 TetR/AcrR family transcriptional regulator, regulator of autoinduction and epiphytic fitness	2	1	0	0	0	0	0	0	0	0	0	0	0	1	0	1	0	0	0	0	0	0	0	0	2	0	0	0	0	0	0	0	1	0	0	0	1	1	1	0	2	0	0	0	0	0	2	0	1
K00886 polyphosphate glucokinase [EC:2.7.1.63]	4	11	0	9	4	0	5	8	4	6	5	5	5	17	7	1	0	3	6	4	8	3	4	4	5	1	4	6	1	6	11	1	2	1	7	17	41	2	4	4	3	5	6	3	5	1	28	1	3
K06405 stage V sporulation protein AC	0	0	0	0	0	0	0	0	0	0	0	0	0	0	0	0	0	0	0	0	0	0	0	0	0	0	0	0	0	0	0	0	0	0	0	0	0	0	0	0	0	0	0	0	0	0	0	0	0
K01647 citrate synthase [EC:2.3.3.1]	349	449	381	296	302	421	255	271	264	218	356	412	291	388	305	255	223	420	275	277	264	354	493	498	391	259	210	254	596	661	403	194	238	254	401	429	286	167	185	87	134	96	83	75	76	62	202	219	151
K09817 zinc transport system ATP-binding protein [EC:7.2.2.20]	8	7	1	5	8	10	5	4	14	6	8	11	2	4	3	2	9	7	6	10	14	8	34	19	8	6	8	7	19	35	16	6	3	17	48	11	10	2	13	4	11	14	7	9	11	7	8	4	8
K03075 preprotein translocase subunit SecG	30	23	12	14	16	18	20	25	20	19	24	13	15	30	19	17	1	18	19	15	19	20	24	52	54	25	23	25	71	94	64	16	23	15	80	40	42	30	40	14	18	7	11	13	14	11	25	22	25
K13039 sulfopyruvate decarboxylase subunit beta [EC:4.1.1.79]	11	1	1	3	0	3	3	1	3	3	5	1	6	12	1	0	0	1	0	2	3	0	12	3	1	7	4	0	2	2	0	0	0	1	0	0	1	2	0	2	3	1	0	0	1	2	0	0	0
K15982 3-ketosteroid 9alpha-monooxygenase subunit A [EC:1.14.15.30]	14	17	1	0	0	0	16	9	0	1	1	0	13	13	4	0	0	0	0	0	2	0	0	0	2	0	0	0	1	0	3	2	0	0	0	0	1	3	0	0	0	0	0	0	0	0	3	1	2
K14086 ech hydrogenase subunit A	0	0	0	0	0	0	0	1	0	0	1	0	0	0	0	0	0	0	0	0	4	2	2	4	0	0	0	0	11	5	0	0	1	0	0	1	1	2	2	4	14	8	4	1	5	4	1	4	0
K13262 isoflavone-7-O-methyltransferase [EC:2.1.1.150]	0	0	0	0	0	0	0	0	0	0	0	0	0	0	0	0	0	0	0	0	0	0	0	0	0	0	0	0	0	0	0	0	0	0	0	0	0	0	0	0	0	0	0	0	0	0	0	0	0
K11525 methyl-accepting chemotaxis protein PixJ	0	1	1	0	0	0	0	0	0	0	0	0	0	0	0	4	0	0	2	0	1	0	0	0	1	0	0	0	0	0	2	0	0	0	0	0	7	2	2	1	0	0	1	0	0	0	1	0	1
K02170 pimeloyl-[acyl-carrier protein] methyl ester esterase [EC:3.1.1.85]	5	6	4	0	1	2	2	3	2	2	2	1	7	3	5	0	0	1	0	0	3	4	0	2	1	1	5	4	9	0	1	0	3	1	4	0	4	1	2	1	1	1	1	1	3	0	1	5	3
K19064 lysine 6-dehydrogenase [EC:1.4.1.18]	25	27	23	11	45	47	16	25	20	18	46	56	17	29	25	31	88	51	18	16	16	38	95	62	27	11	15	26	36	129	21	12	12	31	98	65	13	18	16	10	19	10	14	14	20	34	14	9	11
K04083 molecular chaperone Hsp33	7	4	0	1	0	0	7	3	0	2	1	0	2	2	3	0	0	0	0	0	6	0	0	7	4	2	1	0	4	0	3	2	0	0	0	0	6	1	7	2	0	0	1	2	2	2	2	6	2
K02982 small subunit ribosomal protein S3	328	252	71	54	141	202	131	164	122	79	191	149	241	205	98	107	186	219	129	83	108	201	405	250	254	75	92	121	361	620	320	36	99	205	547	245	345	118	156	66	122	80	114	81	98	95	182	127	79
K19188 2,6-dihydroxypseudooxynicotine hydrolase [EC:3.7.1.19]	0	3	0	0	0	0	2	0	0	0	0	0	0	0	0	0	0	0	0	0	0	0	2	0	1	1	0	0	0	2	0	0	0	0	0	0	0	0	1	0	0	0	1	0	0	1	0	1	0
K02713 photosystem II PsbL protein	0	1	0	0	0	0	1	1	0	0	0	0	0	0	0	0	0	0	0	0	0	0	0	0	1	5	0	0	0	0	4	0	0	0	0	0	9	3	0	1	2	0	0	1	0	0	0	1	0
K06441 ferredoxin hydrogenase gamma subunit [EC:1.12.7.2]	0	0	0	0	0	0	0	0	0	0	0	2	0	0	0	0	0	0	0	0	0	0	0	0	0	0	0	0	0	0	0	0	0	0	0	0	0	0	0	0	0	0	0	0	0	1	1	0	0
K23992 1L-myo-inositol 1-phosphate cytidylyltransferase / CDP-L-myo-inositol myo-inositolphosphotransferase [EC:2.7.7.74 2.7.8.34]	0	0	0	0	0	0	0	0	0	0	0	0	0	0	2	0	0	0	0	0	0	0	0	0	0	0	0	0	0	0	0	0	0	0	0	0	0	0	0	0	0	0	0	0	0	0	0	0	0
K16879 2-furoyl-CoA dehydrogenase 2Fe-2S iron sulfur subunit [EC:1.3.99.8]	0	4	0	0	2	1	1	2	2	1	3	0	5	1	2	0	16	7	0	4	2	2	18	15	0	0	1	0	1	19	1	0	0	3	7	30	0	1	0	0	0	0	0	0	0	0	1	0	0
K01079 phosphoserine phosphatase [EC:3.1.3.3]	15	4	4	3	1	14	6	6	9	5	2	18	9	9	10	7	0	0	10	2	7	10	40	21	17	9	8	2	15	31	15	9	6	5	17	9	7	4	6	1	7	6	3	1	2	5	2	4	6
K07646 two-component system, OmpR family, sensor histidine kinase KdpD [EC:2.7.13.3]	3	4	6	1	1	4	1	4	1	4	4	0	0	2	1	0	27	0	6	1	1	1	3	6	5	2	2	8	3	11	0	0	2	12	21	29	1	1	2	0	2	2	4	3	3	3	3	3	1
K22041 TetR/AcrR family transcriptional regulator, copper-responsive repressor	1	0	1	2	0	0	1	1	0	0	0	0	3	2	1	0	0	0	0	0	0	0	0	0	0	0	0	0	0	0	2	0	0	0	0	0	1	1	2	0	0	0	0	0	0	0	1	3	1
K19569 8-demethyl-8-(2,3-dimethoxy-alpha-L-rhamnosyl)tetracenomycin-C 4'-O-methyltransferase [EC:2.1.1.307]	1	0	2	0	0	0	0	0	0	0	0	0	0	1	1	0	0	0	0	1	0	1	0	0	3	0	0	0	1	1	0	0	0	0	0	0	0	0	0	1	0	0	2	0	0	0	0	0	0
K18894 ATP-binding cassette, subfamily B, multidrug efflux pump	0	0	0	0	0	0	0	0	0	0	0	3	0	0	0	0	0	0	0	0	0	0	3	4	0	0	0	0	0	0	0	0	0	2	0	0	0	0	0	0	0	1	0	0	0	0	0	0	0
K11475 GntR family transcriptional regulator, vanillate catabolism transcriptional regulator	6	7	0	1	3	4	15	4	7	3	2	2	14	7	8	3	0	0	2	2	1	8	3	23	10	4	1	4	25	5	4	6	14	2	9	34	5	6	3	2	3	3	1	1	2	1	1	8	3
K07341 death on curing protein	7	5	1	0	5	13	10	4	1	5	2	1	14	4	4	12	8	6	1	5	3	12	6	11	2	0	6	5	6	27	4	1	8	6	2	0	3	4	5	2	3	3	5	2	1	2	3	6	3
K00090 glyoxylate/hydroxypyruvate/2-ketogluconate reductase [EC:1.1.1.79 1.1.1.81 1.1.1.215]	11	6	3	4	14	4	5	9	6	3	3	4	4	7	1	0	17	12	1	10	5	14	24	15	5	7	5	1	24	19	6	6	2	4	26	38	2	2	3	0	2	4	2	4	2	6	1	5	1
K09740 uncharacterized protein	3	2	1	8	3	12	7	3	2	3	8	5	2	5	7	0	4	7	10	1	5	12	24	23	2	0	11	11	18	36	1	10	3	5	25	22	3	3	4	2	4	2	3	3	7	2	1	5	4
K08314 fructose-6-phosphate aldolase 2 [EC:4.1.2.-]	1	0	0	0	0	0	1	0	0	0	0	0	0	0	0	0	0	0	0	0	0	1	0	0	0	0	0	0	0	0	0	0	0	0	0	0	0	0	0	0	0	0	0	0	0	0	0	0	0
K12343 3-oxo-5-alpha-steroid 4-dehydrogenase 1 [EC:1.3.1.22]	7	1	2	0	1	2	3	0	1	1	0	2	5	2	2	0	17	1	9	8	22	25	59	3	54	16	11	20	44	40	13	9	4	10	11	3	4	2	7	4	8	0	3	10	6	12	1	1	10
K11165 dehydrogenase/reductase SDR family member 7 [EC:1.1.-.-]	3	0	0	0	0	0	2	1	0	0	1	0	0	5	9	0	0	4	1	3	0	1	0	0	2	0	0	0	1	0	2	0	0	0	0	0	1	0	1	0	1	0	1	1	0	0	2	0	0
K07278 translocation and assembly module TamA	0	0	0	0	0	0	2	1	2	0	0	0	6	1	0	0	0	0	0	0	2	1	0	0	4	0	0	1	1	0	2	1	0	0	0	0	11	3	9	0	0	0	3	0	1	0	8	5	3
K15740 tetrahydromethanopterin:alpha-L-glutamate ligase [EC:6.3.2.33]	0	0	0	0	5	2	0	0	8	1	6	2	2	1	0	0	0	7	0	2	5	13	30	21	6	0	0	2	15	31	2	0	2	17	41	10	1	0	1	0	3	2	6	1	0	1	1	1	0
K14629 enoyl reductase	0	0	1	0	0	0	0	0	0	0	0	0	0	0	2	0	0	4	0	0	1	0	0	0	0	0	0	1	0	0	0	0	0	0	0	0	0	0	0	0	1	0	0	0	0	0	0	0	0
K00821 acetylornithine/N-succinyldiaminopimelate aminotransferase [EC:2.6.1.11 2.6.1.17]	54	39	20	11	51	61	22	42	31	38	43	26	42	48	30	17	29	24	24	9	35	47	141	151	43	14	34	31	89	198	44	6	32	41	149	113	35	21	19	10	35	20	26	14	19	28	19	15	22
K15050 nuclease EXOG, mitochondrial	0	0	0	0	0	0	0	0	0	0	0	0	0	0	0	0	0	5	0	0	0	0	0	0	0	0	0	0	0	0	0	0	0	0	0	0	0	0	0	0	0	0	0	0	0	0	0	0	0
K07256 taurine dehydrogenase large subunit [EC:1.4.2.-]	0	0	0	0	0	0	0	0	0	0	0	0	0	0	0	0	0	0	0	0	0	0	0	0	0	0	0	0	0	0	0	0	0	0	0	0	0	0	0	0	0	0	0	0	0	0	1	0	0
K14275 D-xylonate dehydratase [EC:4.2.1.82]	1	8	8	2	11	17	8	2	16	9	10	16	12	14	7	14	15	19	4	7	19	18	45	29	4	2	8	21	49	82	6	4	16	29	27	15	7	2	7	3	13	8	3	5	7	8	2	6	7
K11106 L-tartrate/succinate antiporter	0	2	0	0	0	0	0	1	0	0	0	0	0	0	0	0	0	0	3	0	0	0	0	0	0	0	0	0	0	0	0	0	0	0	0	0	0	0	0	0	0	0	0	0	0	0	0	0	0
K01812 glucuronate isomerase [EC:5.3.1.12]	11	9	7	15	11	27	5	18	19	6	12	7	10	16	20	6	9	21	9	8	11	15	49	63	14	3	11	24	27	98	17	9	20	22	59	60	2	1	12	5	7	4	10	7	12	18	3	6	5
K00446 catechol 2,3-dioxygenase [EC:1.13.11.2]	13	11	1	0	0	0	3	0	0	1	0	0	5	6	2	0	0	0	0	0	0	0	0	0	0	0	0	0	0	0	1	0	0	0	0	0	0	0	0	0	0	0	0	0	0	0	0	1	1
K21328 dTDP-4-amino-4,6-dideoxy-D-glucose/dTDP-4-amino-2,4-dideoxy-beta-L-xylose transaminase [EC:2.6.1.33 2.6.1.-]	0	0	0	0	0	0	0	0	0	0	0	0	0	0	0	0	0	0	0	3	0	0	0	0	0	0	0	2	0	0	0	0	0	0	0	0	0	0	0	0	1	0	0	1	0	0	1	0	0
K17892 ferredoxin-thioredoxin reductase catalytic chain [EC:1.8.7.2]	4	2	0	0	0	7	6	2	0	2	0	5	0	0	2	0	0	0	1	1	0	6	1	0	7	3	1	0	11	6	1	0	1	0	15	0	6	0	6	1	4	0	0	1	3	2	10	6	0
K03725 archaea-specific helicase [EC:3.6.4.-]	0	4	0	0	0	3	0	0	0	1	6	0	0	0	0	0	1	3	0	0	0	2	12	10	0	1	0	1	6	6	0	0	3	4	26	0	1	0	0	0	1	0	3	6	8	2	0	1	1
K04477 putative hydrolase	8	6	5	2	7	10	8	5	8	3	5	8	8	5	9	9	0	24	4	5	15	10	101	67	4	7	11	11	63	129	4	3	15	22	134	89	3	3	8	6	7	4	16	6	4	6	3	3	3
K09957 uncharacterized protein	0	0	0	0	0	0	0	0	0	0	0	0	0	0	0	0	0	0	0	0	0	0	0	0	0	0	0	0	0	0	0	0	0	0	0	0	0	0	1	0	0	0	0	0	0	0	0	0	0
K02473 UDP-N-acetylglucosamine/UDP-N-acetylgalactosamine 4-epimerase [EC:5.1.3.7 5.1.3.-]	34	21	16	10	21	35	23	24	8	22	38	35	30	26	13	12	26	34	18	16	42	37	70	68	29	11	21	35	74	151	18	7	23	33	84	128	15	13	17	7	18	16	15	8	17	6	9	18	9
K01133 choline-sulfatase [EC:3.1.6.6]	186	171	98	89	167	200	118	149	117	85	156	197	102	154	116	72	156	163	48	56	184	189	389	374	90	73	114	142	363	468	74	81	129	219	426	271	30	33	56	32	82	54	77	25	52	72	22	57	53
K07502 uncharacterized protein	2	4	0	2	5	14	2	3	1	4	8	3	2	3	2	2	35	8	0	6	3	14	19	30	3	3	1	4	22	43	4	0	2	5	61	5	0	1	5	1	5	5	2	9	2	11	0	1	2
K19190 nicotine blue oxidoreductase [EC:1.1.1.328]	1	0	0	0	0	0	1	0	0	0	0	1	0	1	1	0	0	1	0	0	3	0	9	0	1	0	0	0	4	0	0	0	0	4	1	0	0	0	0	1	3	1	1	0	0	1	0	2	1
K16099 nonribosomal peptide synthetase protein VioA	0	0	0	0	0	1	0	0	0	0	0	0	0	0	0	0	0	0	0	0	0	0	0	0	0	0	0	0	0	0	0	0	0	0	0	0	0	0	0	0	0	0	0	0	0	0	0	1	0
K00954 pantetheine-phosphate adenylyltransferase [EC:2.7.7.3]	34	32	28	11	22	37	29	22	12	15	28	35	24	20	12	18	14	15	28	5	14	56	132	142	24	14	28	21	64	168	22	7	18	34	96	28	22	14	19	8	19	22	17	15	18	14	20	14	24
K07991 archaeal preflagellin peptidase FlaK [EC:3.4.23.52]	0	3	0	0	0	3	0	0	0	0	0	0	0	0	0	0	0	2	0	1	1	0	1	1	4	0	0	0	2	3	0	0	0	0	1	18	0	0	0	0	4	3	0	2	2	0	0	0	0
K02551 2-succinyl-5-enolpyruvyl-6-hydroxy-3-cyclohexene-1-carboxylate synthase [EC:2.2.1.9]	3	6	3	0	3	3	8	3	3	4	0	2	3	5	0	6	0	2	0	2	2	5	0	0	3	1	1	1	5	4	5	3	0	0	2	0	1	1	3	1	0	1	0	0	0	1	2	4	0
K10237 trehalose/maltose transport system permease protein	11	5	5	7	12	16	2	2	3	2	6	0	6	4	8	6	5	10	7	2	8	10	31	17	5	2	13	6	26	38	8	5	5	3	3	2	2	4	1	4	1	1	2	5	1	3	0	0	2
K07149 uncharacterized protein	0	0	1	0	3	0	0	0	0	0	4	0	0	1	0	0	0	2	0	0	0	0	0	5	0	1	0	0	0	0	0	0	1	0	4	0	0	0	0	0	0	0	1	2	2	0	0	0	0
K25181 drug efflux transport system permease protein	0	0	0	0	0	0	0	0	0	0	0	0	0	0	0	0	0	0	0	0	0	0	0	4	0	0	0	0	0	0	0	0	0	0	0	0	1	0	0	0	0	0	0	0	0	0	0	0	1
K17246 putative chitobiose transport system permease protein	12	4	3	1	0	3	2	2	1	5	0	4	8	3	4	0	0	0	5	3	5	7	17	24	1	2	9	5	10	17	4	4	3	7	19	0	1	1	4	1	3	4	3	2	4	4	1	9	2
K01317 acrosin [EC:3.4.21.10]	0	0	0	0	0	0	0	0	0	0	0	0	0	0	0	0	0	0	0	0	1	0	0	0	0	0	0	0	0	0	0	0	0	0	0	0	0	0	1	0	0	1	1	0	0	0	0	0	0
K02849 heptosyltransferase III [EC:2.4.-.-]	3	5	0	3	3	3	1	3	9	4	2	2	4	14	0	0	0	7	3	3	3	3	20	18	4	8	8	0	9	10	5	2	4	4	0	4	8	2	1	0	4	0	2	4	0	1	8	1	3
K11080 mannopine transport system ATP-binding protein	1	4	1	0	0	7	7	4	0	0	4	1	1	0	0	0	0	2	1	0	6	2	11	1	1	6	0	1	6	2	0	0	2	0	1	6	1	1	0	1	0	0	1	0	0	0	0	1	0
K10213 ribosylpyrimidine nucleosidase [EC:3.2.2.8]	1	0	7	0	0	1	1	0	3	1	3	0	1	0	0	6	9	0	0	0	4	0	1	1	0	0	2	1	4	1	1	2	1	7	4	9	0	1	2	1	1	1	5	2	2	3	0	1	1
K06954 uncharacterized protein	35	8	1	0	0	0	11	1	2	2	0	10	10	4	3	1	0	1	4	13	14	13	17	6	32	10	2	6	36	22	22	4	3	13	10	0	4	6	7	5	5	2	3	5	4	5	3	5	2
K02892 large subunit ribosomal protein L23	114	89	27	29	66	48	55	80	23	38	60	45	100	95	32	23	57	53	49	16	37	48	130	130	126	31	38	23	108	149	136	15	31	32	134	83	95	47	52	18	30	21	46	33	42	37	52	41	32
K04117 cyclohexanecarboxyl-CoA dehydrogenase [EC:1.3.99.-]	4	0	1	1	1	0	0	2	2	2	1	1	1	3	0	0	1	0	0	1	0	2	7	1	0	0	4	5	10	3	0	0	1	7	2	0	0	0	0	0	5	2	3	1	0	1	0	1	0
K18474 trans-2-decenoyl-[acyl-carrier protein] isomerase [EC:5.3.3.14]	0	0	0	0	0	0	0	0	0	0	0	0	0	0	0	0	0	1	0	0	0	0	2	4	0	0	0	0	1	0	0	0	1	0	0	0	0	0	0	0	0	0	0	0	0	0	0	0	0
K10756 replication factor C subunit 3/5	0	0	0	0	0	0	0	0	0	0	0	0	0	0	0	0	0	0	0	0	0	0	0	5	0	0	0	0	4	0	0	0	0	0	0	0	0	0	0	0	0	0	0	0	0	0	0	0	0
K00028 malate dehydrogenase (decarboxylating) [EC:1.1.1.39]	0	0	0	0	0	0	0	0	0	0	0	0	0	1	0	0	0	0	0	0	0	0	0	0	0	0	0	0	0	0	0	0	0	0	0	0	0	0	0	0	0	0	0	0	0	0	0	0	0
K21961 TetR/AcrR family transcriptional regulator, ethionamide resistance regulator	5	3	6	2	4	4	1	2	6	1	3	0	1	7	9	5	0	3	0	10	3	2	4	0	16	3	4	1	2	11	4	2	3	3	0	0	0	2	1	1	0	0	0	0	0	0	0	0	0
K21572 starch-binding outer membrane protein, SusD/RagB family	314	305	144	91	91	85	200	258	205	114	103	105	245	345	144	77	182	148	105	115	139	142	398	652	210	94	91	96	360	731	165	65	101	135	390	636	143	113	175	57	126	101	140	136	92	79	77	139	102
K02771 fructose PTS system EIID component	0	0	0	0	0	0	0	0	1	0	0	0	0	1	0	2	0	1	0	0	0	0	0	0	0	0	0	1	0	0	0	1	0	0	0	0	0	0	0	0	0	0	0	0	0	0	0	0	0
K00651 homoserine O-succinyltransferase/O-acetyltransferase [EC:2.3.1.46 2.3.1.31]	9	6	2	6	0	0	16	16	1	6	1	0	14	2	0	0	0	0	4	3	2	0	6	6	10	2	1	0	2	2	3	0	1	11	1	0	2	3	7	1	1	1	1	2	1	0	1	2	1
K06076 long-chain fatty acid transport protein	130	101	38	29	40	61	77	72	44	41	42	47	102	86	48	22	48	36	47	47	42	52	85	153	123	57	61	77	115	193	136	20	53	36	82	25	68	60	67	30	22	38	49	60	30	11	51	60	58
K18243 salicylate 5-hydroxylase small subunit [EC:1.14.13.172]	0	1	0	0	0	0	0	0	0	0	0	0	0	0	0	0	0	0	0	0	0	0	0	0	0	0	0	0	0	0	0	0	0	0	0	0	0	0	0	0	0	0	0	0	0	0	0	0	0
K16511 adapter protein MecA 1/2	0	0	0	0	0	0	0	0	0	0	0	0	0	0	0	0	0	0	1	0	0	0	0	0	1	0	0	0	0	0	0	0	0	0	0	0	1	0	2	1	0	0	0	0	0	0	0	0	1
K01180 endo-1,3(4)-beta-glucanase [EC:3.2.1.6]	1	0	0	3	1	0	0	1	1	0	0	0	0	0	2	0	0	5	5	0	1	0	0	1	1	0	1	1	0	0	6	0	6	4	0	5	3	0	1	1	0	0	1	0	1	0	3	0	1
K15579 nitrate/nitrite transport system ATP-binding protein	1	0	0	0	0	0	0	0	0	0	0	0	0	0	0	0	0	0	0	0	0	0	0	0	0	0	0	0	0	0	0	0	0	0	0	0	0	0	0	0	0	2	0	0	0	0	0	0	0
K13938 dihydromonapterin reductase / dihydrofolate reductase [EC:1.5.1.50 1.5.1.3]	1	0	0	0	0	0	1	0	0	0	0	0	0	0	0	0	0	0	0	0	0	0	0	0	1	0	0	0	0	0	0	0	0	0	0	0	0	0	0	1	0	0	0	0	0	0	0	0	0
K05591 ATP-dependent RNA helicase DbpA [EC:3.6.4.13]	10	4	2	1	1	0	3	1	2	1	0	0	4	2	0	5	0	0	0	0	2	3	0	0	9	4	1	0	5	7	5	0	0	0	0	0	6	3	2	0	0	0	1	0	0	0	1	2	1
K01444 N4-(beta-N-acetylglucosaminyl)-L-asparaginase [EC:3.5.1.26]	8	4	1	0	1	4	1	0	0	2	3	6	2	1	1	0	11	1	0	7	2	7	8	20	3	2	2	4	12	35	4	0	0	9	17	0	1	1	3	1	3	1	1	2	4	5	1	3	0
K18335 2-keto-3-deoxy-L-fuconate dehydrogenase [EC:1.1.1.-]	7	1	0	2	3	2	0	4	1	2	0	0	1	7	5	1	0	0	3	1	1	2	2	8	2	2	0	0	3	3	7	1	0	5	0	0	2	0	2	0	1	1	1	1	0	0	0	0	0
K03316 monovalent cation:H+ antiporter, CPA1 family	24	21	15	17	20	15	17	13	17	9	11	3	14	17	11	2	18	5	8	13	9	11	16	13	8	2	16	17	23	5	13	4	12	19	17	0	12	5	19	3	9	4	8	3	4	13	13	10	11
K22132 tRNA threonylcarbamoyladenosine dehydratase	0	4	1	0	2	3	2	0	4	0	2	0	2	3	1	1	0	0	0	1	0	2	2	2	10	0	0	0	3	0	1	0	0	5	2	2	2	3	0	2	1	1	3	3	0	1	2	2	1
K20817 N-acyl-D-aspartate deacylase [EC:3.5.1.83]	2	1	0	0	0	1	1	0	0	0	0	0	3	0	0	3	0	0	0	0	0	0	0	1	0	0	0	0	0	0	0	0	0	0	0	0	0	0	0	0	0	0	0	0	0	0	0	0	0
K03816 xanthine phosphoribosyltransferase [EC:2.4.2.22]	2	8	2	2	3	5	2	1	1	3	3	1	6	0	1	0	0	3	2	0	0	2	7	1	3	1	1	0	5	0	2	1	0	1	0	0	0	1	2	1	2	1	0	0	0	1	2	1	0
K01244 5'-methylthioadenosine nucleosidase [EC:3.2.2.16]	0	0	0	0	0	0	0	0	0	0	0	0	0	0	0	0	0	0	0	0	0	0	0	0	0	0	0	0	0	0	0	0	0	0	0	0	0	0	0	0	0	0	0	0	0	0	0	1	0
K00221 alkylmercury lyase [EC:4.99.1.2]	0	0	0	0	1	0	1	0	0	0	0	2	0	0	0	0	0	1	0	1	0	0	0	0	0	0	0	0	2	4	0	0	0	0	0	0	0	0	0	0	1	0	0	0	0	0	0	0	0
K07717 two-component system, sensor histidine kinase GlnK [EC:2.7.13.3]	0	0	0	0	0	0	0	0	0	0	0	0	0	0	0	0	0	0	0	0	0	0	0	0	0	0	0	0	0	0	0	0	0	0	0	0	0	0	0	0	0	0	0	0	0	0	0	0	0
K03503 DNA polymerase V [EC:3.4.21.-]	2	0	3	0	0	0	0	0	0	2	1	0	0	0	1	0	0	0	0	1	0	0	0	2	1	2	3	0	3	0	4	1	1	0	0	0	3	1	3	0	0	1	2	6	9	1	0	0	0
K22357 alkene monooxygenase alpha subunit [EC:1.14.13.69]	0	0	0	0	0	0	0	0	0	0	0	0	0	0	0	0	0	0	0	0	0	0	0	0	0	0	0	0	0	0	0	0	0	0	0	0	0	0	0	0	0	0	0	0	0	0	0	0	0
K09873 aquaporin TIP	12	2	0	1	0	0	1	3	1	0	0	0	0	1	0	0	0	0	0	0	0	0	0	0	2	0	0	0	0	0	0	0	0	0	0	0	0	0	1	0	0	0	0	0	0	0	0	0	0
K05919 superoxide reductase [EC:1.15.1.2]	73	97	36	48	88	101	70	91	72	58	76	122	55	113	40	44	80	124	101	78	199	245	345	292	230	108	127	103	395	681	257	64	72	132	451	277	104	55	72	42	91	38	55	74	89	84	44	67	60
K05777 putative thiamine transport system substrate-binding protein	16	2	2	2	6	0	5	14	5	1	2	0	10	3	1	0	0	2	2	4	5	5	0	0	3	6	0	0	3	1	8	2	0	1	12	0	0	0	1	0	0	0	2	0	0	1	1	2	1
K00087 xanthine dehydrogenase molybdenum-binding subunit [EC:1.17.1.4]	46	64	29	18	95	59	45	66	37	37	50	47	46	58	44	20	80	55	25	33	66	56	181	173	37	36	53	32	173	347	35	17	67	61	166	152	68	22	28	13	37	21	28	19	31	33	23	24	25
K20246 L-histidine Nalpha-methyltransferase / hercynylcysteine S-oxide synthase [EC:2.1.1.44 1.14.99.51]	2	0	0	0	0	0	0	0	0	0	0	0	0	0	0	0	0	0	0	0	0	0	0	0	0	0	0	0	0	0	1	0	0	0	0	0	0	0	0	0	0	0	0	0	0	0	0	0	0
K18815 aminoglycoside 6'-N-acetyltransferase I [EC:2.3.1.82]	0	0	0	0	0	0	0	2	0	0	1	1	0	3	6	0	0	0	0	1	1	8	0	5	3	0	0	0	1	0	0	0	0	0	0	0	3	2	3	0	2	1	1	1	2	4	0	3	2
K07880 Ras-related protein Rab-4B	0	2	0	2	0	4	3	0	1	0	5	0	0	0	0	0	18	1	3	3	8	6	9	12	8	1	9	6	13	22	2	1	2	8	21	0	2	1	4	3	6	11	4	0	0	6	0	4	3
K01045 arylesterase / paraoxonase [EC:3.1.1.2 3.1.8.1]	3	1	0	1	0	0	2	1	1	0	0	0	0	2	0	0	0	0	0	1	3	0	0	0	0	1	2	0	0	1	1	0	0	0	0	5	0	2	0	1	1	0	0	0	0	0	2	0	0
K12960 5-methylthioadenosine/S-adenosylhomocysteine deaminase [EC:3.5.4.31 3.5.4.28]	66	64	15	19	51	71	23	43	37	21	46	95	37	47	16	6	30	78	28	35	34	58	157	86	29	19	44	50	90	169	28	20	30	66	229	110	29	26	22	10	47	18	25	22	21	24	19	28	21
K02343 DNA polymerase III subunit gamma/tau [EC:2.7.7.7]	55	41	21	19	32	62	42	36	38	25	27	59	35	53	21	20	42	70	30	16	25	58	198	180	44	20	38	55	116	237	34	13	35	64	132	132	54	26	32	29	42	27	44	29	41	36	36	39	29
K00872 homoserine kinase [EC:2.7.1.39]	4	8	2	1	7	4	3	4	2	0	5	8	2	6	4	0	0	8	3	0	1	8	10	5	11	2	7	4	17	23	4	2	11	7	20	11	4	1	1	2	4	3	4	1	0	4	2	3	1
K20199 4-hydroxybenzaldehyde dehydrogenase (NADP+) [EC:1.2.1.96]	0	0	0	0	0	0	0	0	0	0	0	0	0	0	0	0	0	0	0	0	0	0	0	0	0	0	0	0	0	0	0	0	0	0	0	0	0	0	0	0	0	0	0	0	0	0	0	0	0
K00076 7-alpha-hydroxysteroid dehydrogenase [EC:1.1.1.159]	12	6	5	1	9	1	5	3	3	0	9	2	3	5	1	6	0	3	5	4	1	6	22	15	8	3	4	7	14	5	10	0	7	6	4	14	5	2	2	1	2	1	1	2	0	2	1	3	2
K13889 glutathione transport system substrate-binding protein	79	80	117	50	113	120	90	73	89	76	119	94	58	71	64	74	81	126	26	43	37	88	241	214	33	39	61	73	217	710	22	21	40	108	214	228	13	21	9	8	21	13	20	15	12	24	8	10	8
K01596 phosphoenolpyruvate carboxykinase (GTP) [EC:4.1.1.32]	152	197	110	130	149	150	123	143	118	77	142	119	70	172	125	111	189	114	134	69	110	143	230	190	148	101	112	139	261	339	194	70	66	115	269	241	114	54	49	31	59	66	64	62	33	54	61	64	56
K21325 dTDP-rhamnose C3-O-methyltransferase [EC:2.1.1.-]	1	1	0	0	0	0	2	0	1	1	1	0	1	0	0	0	0	0	0	0	5	1	7	0	0	0	5	7	0	0	2	0	3	0	0	0	0	0	2	0	0	0	0	0	0	0	1	2	2
K09892 cell division protein ZapB	4	1	0	0	0	0	2	1	0	0	0	0	3	5	0	0	0	0	2	1	1	1	6	0	8	2	2	4	0	0	11	1	0	0	0	0	6	8	5	0	0	1	1	1	0	0	7	0	9
K13550 2-deoxystreptamine N-acetyl-D-glucosaminyltransferase / 2-deoxystreptamine glucosyltransferase [EC:2.4.1.283 2.4.1.284]	0	0	0	0	0	0	1	0	0	0	0	0	0	0	0	0	0	0	0	0	0	2	1	0	0	0	0	0	0	0	0	0	0	0	0	0	0	0	0	0	0	0	0	0	0	0	0	0	0
K20918 LuxR family transcriptional regulator, positive regulator of biofilm formation	0	1	0	0	0	0	0	1	0	0	0	3	0	0	0	0	0	0	1	0	0	1	1	0	0	0	1	5	4	0	0	0	0	0	10	0	1	0	0	1	1	0	0	0	0	0	1	0	0
K11041 exfoliative toxin A/B	0	0	0	0	0	0	0	0	0	0	0	0	0	0	0	0	0	0	0	0	0	0	0	0	0	0	0	0	0	0	0	0	0	0	0	0	0	0	0	0	0	0	0	0	0	0	0	0	0
K06860 putative heme uptake system protein	0	0	0	0	0	0	0	0	0	0	0	0	0	0	0	0	0	0	0	0	0	0	0	0	0	0	0	0	0	0	0	0	0	0	0	0	0	0	0	0	0	0	0	0	0	0	0	0	0
K12950 manganese-transporting P-type ATPase C [EC:7.2.2.22]	2	3	1	2	2	17	2	6	0	1	19	7	4	1	5	0	0	16	0	0	10	4	38	13	2	1	3	3	4	46	0	1	1	8	20	43	2	1	2	2	5	4	1	4	12	15	0	3	3
K03340 diaminopimelate dehydrogenase [EC:1.4.1.16]	0	0	0	0	0	0	0	0	0	0	0	0	0	0	0	0	0	0	0	0	0	0	0	2	0	0	1	0	0	0	0	0	2	0	0	0	0	0	0	0	0	0	1	1	0	0	0	1	0
K09153 small membrane protein	10	8	11	1	14	12	7	5	3	2	11	22	13	12	4	11	0	19	3	3	10	9	52	38	14	7	8	7	42	76	6	4	12	10	78	84	6	5	2	6	4	3	10	8	9	6	3	6	4
K22020 mucin-19	3	5	2	3	8	10	5	1	3	3	5	15	5	8	5	7	28	6	3	2	8	12	34	14	1	2	18	5	24	66	8	14	4	4	41	36	10	2	5	3	5	5	3	2	1	2	6	4	3
K08692 malate-CoA ligase subunit alpha [EC:6.2.1.9]	0	0	0	0	0	0	0	1	1	0	0	0	2	2	0	0	0	0	0	0	0	0	0	0	1	0	0	0	0	0	0	2	0	0	0	0	1	0	0	0	0	0	0	0	0	0	0	2	0
K01474 N-methylhydantoinase B [EC:3.5.2.14]	80	80	38	25	80	80	44	48	45	40	72	58	49	63	53	28	39	67	11	19	63	67	185	215	35	28	50	66	177	307	35	31	54	71	154	184	29	13	16	6	20	18	11	11	25	37	11	29	15
K02457 general secretion pathway protein H	6	2	0	0	2	1	3	1	1	0	1	3	2	3	0	1	0	3	1	3	0	6	8	13	0	3	2	1	3	24	9	0	2	2	7	0	6	6	2	0	3	4	3	3	0	4	4	2	1
K03294 basic amino acid/polyamine antiporter, APA family	16	15	10	10	14	20	6	9	12	7	9	22	15	14	27	19	24	36	13	11	26	28	109	150	18	8	17	22	70	169	13	5	38	28	158	38	22	7	11	10	16	14	16	14	14	15	16	22	14
K00281 glycine dehydrogenase [EC:1.4.4.2]	101	21	16	11	8	9	25	23	16	10	14	0	54	25	9	7	5	13	20	18	16	8	15	9	20	14	7	10	14	47	29	15	7	14	20	30	18	13	24	6	2	12	8	5	0	2	21	11	13
K12368 dipeptide transport system substrate-binding protein	196	129	96	76	109	123	94	122	126	105	97	88	134	126	115	64	124	57	69	37	99	139	234	263	106	71	104	85	160	452	98	40	67	116	178	182	84	25	43	19	37	26	45	42	64	47	40	49	26
K19954 alcohol dehydrogenase [EC:1.1.1.-]	30	15	13	5	13	13	10	12	16	5	6	10	29	13	14	6	0	26	7	12	12	23	34	34	19	5	11	12	15	21	16	7	7	11	17	23	17	5	6	7	5	5	8	5	5	7	11	5	9
K05658 ATP-binding cassette, subfamily B (MDR/TAP), member 1 [EC:7.6.2.2]	0	0	0	2	0	0	0	0	0	0	0	5	0	0	2	0	0	0	0	0	0	0	0	0	0	0	0	0	0	0	0	0	0	0	0	0	0	0	0	0	0	0	0	0	0	0	0	0	0
K09738 uncharacterized protein	0	0	0	0	0	0	0	0	0	0	1	2	0	0	0	0	0	4	0	0	0	0	0	0	0	0	0	0	0	9	0	0	0	0	0	0	0	0	0	0	0	0	0	0	0	1	1	0	0
K00580 tetrahydromethanopterin S-methyltransferase subunit D [EC:2.1.1.86]	0	0	0	0	0	0	0	0	0	0	0	0	0	0	0	0	0	0	0	0	0	0	0	0	0	0	0	0	0	0	1	0	0	0	0	0	0	0	0	7	69	27	33	12	17	14	0	0	4
K13930 triphosphoribosyl-dephospho-CoA synthase [EC:2.4.2.52]	0	0	0	0	0	0	0	0	0	0	0	0	0	0	0	0	0	0	0	0	0	0	0	0	0	0	0	0	0	0	0	0	0	0	0	0	0	0	0	0	0	1	0	0	0	0	0	0	0
K01524 exopolyphosphatase / guanosine-5'-triphosphate,3'-diphosphate pyrophosphatase [EC:3.6.1.11 3.6.1.40]	13	8	3	1	5	13	4	7	2	0	3	6	9	6	3	0	0	3	1	1	8	7	11	0	13	7	4	5	12	15	30	3	3	8	8	0	6	4	9	1	3	6	5	3	2	7	11	3	8
K18314 (R)-citramalyl-CoA lyase [EC:4.1.3.46]	1	0	1	0	0	0	2	0	0	2	0	0	1	0	0	0	0	0	4	0	0	0	0	0	0	1	0	0	0	0	0	1	0	0	0	0	1	0	0	0	1	0	0	0	0	0	0	0	1
K12260 sulfiredoxin [EC:1.8.98.2]	0	0	0	0	0	0	0	0	0	0	0	0	0	0	0	0	0	0	0	0	0	0	0	0	0	0	0	0	0	0	0	0	0	0	0	0	0	0	1	0	0	0	0	0	0	0	0	0	0
K17763 rsbT co-antagonist protein RsbR	21	15	3	3	14	12	16	12	10	5	9	15	18	13	10	1	24	12	1	3	0	2	9	11	4	4	4	1	6	22	15	0	1	4	20	0	2	5	1	2	5	6	3	2	0	2	0	2	2
K00743 N-acetyllactosaminide 3-alpha-galactosyltransferase [EC:2.4.1.87]	0	0	0	0	1	0	0	0	0	0	0	2	1	1	0	0	0	5	1	0	0	0	6	0	1	3	0	1	1	7	0	2	0	0	9	18	14	1	2	2	0	1	2	1	0	2	4	1	2
K18846 16S rRNA (adenine(1408)-N(1))-methyltransferase [EC:2.1.1.180]	0	0	0	0	0	0	0	0	0	0	0	0	0	0	0	0	0	0	0	0	0	2	0	0	0	0	0	0	2	0	0	0	0	0	4	0	0	0	0	0	0	0	0	0	0	0	0	0	0
K09748 ribosome maturation factor RimP	31	17	3	4	6	8	20	16	11	8	19	6	10	13	8	6	6	4	10	1	11	16	8	20	31	24	23	15	22	10	15	5	19	7	15	35	35	27	28	9	10	7	16	19	7	10	16	11	17
K21140 [CysO sulfur-carrier protein]-S-L-cysteine hydrolase [EC:3.13.1.6]	11	9	0	0	0	4	2	3	0	0	0	2	7	2	1	1	0	0	0	0	0	2	0	0	3	1	3	1	3	0	0	0	1	0	0	0	0	0	1	0	0	0	0	0	1	0	0	0	0
K19785 nicotinamide-nucleotide adenylyltransferase [EC:2.7.7.1]	0	0	0	0	0	0	1	0	0	0	0	0	0	0	0	0	0	0	0	0	0	0	0	0	0	0	0	0	0	0	0	0	0	1	0	0	0	0	0	0	0	0	0	0	0	0	0	0	0
K20370 phosphoenolpyruvate carboxykinase (diphosphate) [EC:4.1.1.38]	11	18	5	1	0	2	4	7	4	4	3	0	16	5	2	2	0	9	3	1	4	4	7	6	13	2	2	5	6	12	8	2	0	0	0	0	8	17	7	2	4	3	2	2	0	0	5	7	5
K20448 nicotinate dehydrogenase medium molybdopterin subunit [EC:1.17.1.5]	8	15	7	5	14	8	1	5	9	3	2	10	9	11	4	0	0	10	2	7	12	12	28	20	8	5	8	9	25	10	4	8	4	7	24	59	10	3	2	2	3	4	3	13	10	5	1	6	2
K02444 DeoR family transcriptional regulator, glycerol-3-phosphate regulon repressor	6	0	0	0	0	1	0	1	0	1	0	0	3	5	0	0	0	0	3	6	3	2	0	10	0	1	5	7	4	3	3	2	0	1	6	0	2	6	2	2	3	1	1	2	0	1	3	3	2
K03276 UDP-glucose/galactose:(glucosyl)LPS alpha-1,2-glucosyl/galactosyltransferase [EC:2.4.1.-]	0	0	0	0	0	0	0	0	0	0	0	0	0	0	0	0	0	0	0	0	0	0	0	0	0	0	0	0	0	0	0	0	0	0	0	0	0	0	0	0	0	0	0	0	0	0	0	0	0
K04065 hyperosmotically inducible periplasmic protein	3	14	11	11	2	6	6	14	4	5	4	0	7	4	15	3	4	0	18	9	3	3	1	2	19	11	7	9	5	9	18	3	2	0	9	0	17	21	20	8	18	1	6	6	6	3	47	21	13
K23349 putative dimethyl sulfoxide reductase chaperone	21	12	3	0	1	0	14	12	0	0	0	0	12	17	0	0	0	0	2	1	4	3	6	3	4	2	1	1	4	7	5	3	3	7	0	0	252	36	2	2	1	1	4	0	1	1	149	23	34
K00200 formylmethanofuran dehydrogenase subunit A [EC:1.2.7.12]	6	12	9	2	26	57	5	8	10	5	45	48	15	4	7	0	60	64	0	22	33	79	135	85	9	15	33	42	107	134	2	13	30	92	141	131	3	5	8	18	315	85	62	14	56	33	4	4	24
K01757 strictosidine synthase [EC:4.3.3.2]	0	1	1	0	1	10	0	0	0	1	1	0	2	0	3	1	0	4	0	2	1	9	7	0	3	2	2	2	2	10	0	6	4	4	21	0	1	0	3	0	7	2	5	1	1	0	0	3	0
K15599 putative hydroxymethylpyrimidine transport system permease protein	7	7	4	2	2	8	0	7	0	2	3	5	3	3	1	0	5	7	1	0	3	1	3	5	3	1	0	4	2	0	4	2	3	3	0	0	0	0	3	2	2	0	1	0	0	0	0	4	1
K23975 L-aspartate semialdehyde sulfurtransferase [EC:2.8.1.16]	2	1	1	7	2	30	0	5	4	5	7	11	7	7	10	12	0	19	15	5	8	19	44	43	12	6	14	18	29	61	10	5	5	3	56	29	7	3	10	9	11	4	9	12	6	7	3	10	2
K22102 dihydroneopterin phosphate aldolase [EC:4.1.2.59]	0	0	2	2	0	5	0	0	0	0	0	1	0	0	0	0	0	0	0	0	2	0	0	1	0	1	1	0	0	0	2	0	0	3	0	0	0	0	0	0	0	0	1	0	0	0	0	0	0
K23351 glutaconyl-CoA/methylmalonyl-CoA decarboxylase subunit gamma	1	0	3	0	0	0	0	0	0	0	0	1	2	0	0	0	0	0	0	0	0	1	1	0	0	0	0	0	2	0	0	0	3	0	0	0	0	0	0	0	0	0	1	0	2	0	1	0	0
K08313 fructose-6-phosphate aldolase 1 [EC:4.1.2.-]	0	0	0	0	0	0	0	0	0	0	0	0	0	0	0	0	0	0	0	0	0	0	0	0	0	0	0	0	0	0	0	0	0	0	0	0	0	0	0	0	0	0	0	1	0	0	0	0	0
K15181 negative elongation factor C/D	0	0	0	0	0	0	0	0	0	0	0	0	0	0	0	0	0	0	0	0	0	0	0	0	0	0	0	0	0	0	0	0	0	0	0	0	0	0	0	0	0	0	0	0	0	0	0	0	0
K00043 4-hydroxybutyrate dehydrogenase [EC:1.1.1.61]	2	4	3	1	5	5	0	1	0	1	0	1	6	1	0	0	13	6	1	1	2	2	9	3	1	2	0	4	2	10	0	1	0	0	5	0	2	0	0	1	3	0	0	2	0	0	0	2	1
K21610 Ni-sirohydrochlorin a,c-diamide reductive cyclase subunit CfbC [EC:6.3.3.7]	0	1	0	0	0	0	1	0	0	0	0	0	0	0	0	0	0	1	0	1	0	0	0	2	0	0	0	0	0	0	0	0	0	0	15	6	0	0	0	0	4	5	2	0	1	1	0	1	0
K07443 methylated-DNA-protein-cysteine methyltransferase related protein	10	2	2	4	0	7	2	2	3	0	1	1	4	1	5	11	0	7	5	2	7	6	7	14	4	1	2	5	3	1	0	1	2	1	7	4	0	1	6	3	1	0	1	0	9	1	0	1	0
K15257 tRNA (mo5U34)-methyltransferase [EC:2.1.1.-]	7	2	0	3	2	4	1	1	4	2	0	0	1	3	5	2	0	7	3	0	0	2	4	1	5	0	2	3	8	4	4	1	0	2	0	0	5	1	1	0	1	0	2	2	0	0	4	1	1
K03381 catechol 1,2-dioxygenase [EC:1.13.11.1]	2	0	0	0	0	0	0	0	0	0	0	0	0	2	0	0	0	0	0	0	0	0	0	0	1	0	0	0	0	0	1	0	0	0	0	0	1	0	1	0	1	0	0	0	0	0	0	1	0
K12058 conjugal transfer mating pair stabilization protein TraN	1	0	0	0	0	0	0	0	0	0	1	0	0	0	0	0	0	0	0	0	0	0	0	0	0	0	1	0	0	0	2	0	0	0	0	0	0	0	0	1	0	0	0	0	0	0	0	0	0
K09252 feruloyl esterase [EC:3.1.1.73]	1	3	3	3	12	2	1	3	0	1	2	0	1	2	0	4	0	0	0	0	0	1	0	3	0	1	0	4	2	13	1	0	0	0	0	0	0	0	0	0	1	0	0	2	0	0	0	3	1
K10725 archaeal cell division control protein 6	8	7	0	2	16	65	4	4	6	6	20	50	0	9	0	5	16	42	7	0	12	31	125	58	7	8	36	38	36	96	7	11	16	39	102	112	1	5	9	7	28	27	25	19	27	28	1	7	11
K18189 translational activator of cytochrome c oxidase 1	43	30	17	20	15	30	29	18	24	26	36	29	33	31	20	38	20	42	18	14	27	43	140	81	40	15	31	14	53	110	28	12	24	32	47	90	19	21	19	25	37	12	22	19	16	20	21	17	16
K02966 small subunit ribosomal protein S19e	7	11	7	4	38	28	0	11	11	14	33	43	2	10	2	3	74	44	4	7	9	46	97	103	17	11	7	21	73	112	9	5	21	36	114	76	5	6	9	7	28	11	34	18	22	28	7	15	7
K07788 multidrug efflux pump	0	0	0	0	0	0	0	0	0	0	0	0	0	0	0	0	0	0	0	0	0	0	0	0	0	0	0	0	0	0	0	0	0	0	0	0	0	0	0	1	1	3	1	1	0	0	2	0	6
K02569 cytochrome c-type protein NapC	45	43	14	6	3	2	35	22	13	14	2	1	30	42	23	11	31	4	6	7	7	7	15	10	19	5	0	5	14	10	29	11	0	7	5	0	4	4	3	2	2	3	4	0	2	0	2	6	10
K21788 dodecanoy-ACP synthase	0	0	0	0	0	0	0	0	0	0	0	0	0	0	0	0	0	0	0	0	0	0	0	0	0	0	0	0	0	0	0	0	0	1	0	0	0	0	0	0	0	0	0	0	0	0	0	1	0
K06440 similar to spore coat protein	0	0	0	0	0	0	0	0	0	0	0	0	0	0	0	0	0	0	0	0	0	0	0	0	0	0	0	0	0	0	0	0	0	0	0	0	0	0	0	0	0	0	0	0	0	0	0	0	0
K14470 2-methylfumaryl-CoA isomerase [EC:5.4.1.3]	2	1	0	0	0	0	2	1	0	0	4	0	0	0	0	8	0	0	0	0	0	0	0	0	3	0	0	0	0	0	0	0	0	0	0	0	0	0	0	0	0	1	0	0	0	0	0	0	0
K00496 alkane 1-monooxygenase [EC:1.14.15.3]	8	2	0	0	2	0	10	7	1	1	0	0	6	0	3	0	0	1	2	0	3	0	0	0	3	1	2	0	0	0	1	0	0	0	0	0	1	0	1	0	0	0	0	0	0	0	0	0	1
K12212 intracellular multiplication protein IcmJ	0	0	0	0	0	0	0	0	0	0	0	0	0	0	0	0	0	0	0	0	0	0	0	0	0	0	0	0	0	0	0	0	0	0	0	0	0	0	0	0	0	0	0	0	0	0	0	0	0
K08300 ribonuclease E [EC:3.1.26.12]	50	38	19	11	32	31	13	32	14	22	32	25	29	31	24	31	14	28	14	24	37	31	69	43	28	12	36	8	60	86	37	11	21	27	79	29	71	36	29	25	31	16	38	11	12	12	35	35	22
K13020 UDP-N-acetyl-2-amino-2-deoxyglucuronate dehydrogenase [EC:1.1.1.335]	15	34	18	12	21	58	21	18	23	32	29	33	10	23	17	27	29	60	22	8	52	55	116	131	27	17	37	60	91	123	20	20	43	78	179	103	18	17	14	6	11	26	18	14	14	22	11	14	10
K08941 photosystem P840 reaction center iron-sulfur protein	0	0	0	0	0	0	0	0	0	0	0	0	0	0	0	0	0	0	0	0	0	0	0	0	0	1	0	0	0	0	1	0	0	0	0	0	0	0	0	0	0	0	0	0	0	0	0	0	0
K21887 cation-transporting P-type ATPase J [EC:7.2.2.-]	0	0	0	0	0	0	0	1	0	0	0	0	0	0	1	0	0	0	0	0	0	0	0	0	0	0	0	0	0	0	1	0	0	0	0	0	0	0	0	0	0	0	0	0	0	0	0	0	0
K10024 arginine/ornithine transport system permease protein	3	1	0	0	0	0	1	2	0	0	2	0	2	3	2	0	0	0	1	0	0	0	0	3	0	1	1	1	0	0	11	0	4	1	0	0	2	0	0	0	0	0	1	0	0	0	0	0	0
K07573 exosome complex component CSL4	3	6	1	4	19	29	3	1	0	2	1	13	2	1	0	8	4	25	3	1	7	11	39	46	1	3	8	3	43	67	0	0	2	7	50	13	0	2	5	4	13	15	16	5	4	16	1	1	1
K03060 DNA-directed RNA polymerase subunit omega [EC:2.7.7.6]	38	38	13	14	6	12	24	27	9	5	9	14	39	35	8	8	31	9	10	12	9	1	35	17	20	10	10	17	25	40	23	11	5	6	20	36	6	17	16	6	7	7	3	9	13	6	17	17	13
K19123 CRISPR system Cascade subunit CasA	0	0	0	0	1	0	1	1	2	4	2	0	2	0	0	0	0	0	0	0	0	2	2	2	0	3	0	3	6	16	0	1	0	2	1	0	4	3	1	2	1	2	2	0	0	0	1	1	1
K16904 dCTP diphosphatase [EC:3.6.1.12]	7	2	2	0	3	6	3	9	4	2	8	0	6	4	1	0	13	2	2	0	1	1	3	7	0	2	4	3	5	12	6	4	1	4	1	0	1	1	1	1	1	1	1	0	1	1	2	2	0
K12372 dipeptide transport system ATP-binding protein	2	10	2	0	2	2	0	6	3	0	0	0	2	2	0	0	0	0	6	4	0	3	0	2	2	3	1	0	0	11	2	1	0	0	0	0	2	0	2	0	2	1	1	3	2	1	0	3	0
K14683 solute carrier family 34 (sodium-dependent phosphate cotransporter)	3	9	0	0	5	4	4	2	4	1	2	13	3	4	2	0	3	21	3	1	4	10	11	22	1	5	8	1	15	27	3	5	13	12	13	1	4	0	1	0	7	2	6	4	2	3	0	1	1
K11720 lipopolysaccharide export system permease protein	9	10	9	4	12	6	5	13	3	3	6	13	3	14	6	0	14	28	6	2	9	13	31	30	4	2	0	14	19	30	10	2	1	7	15	64	2	5	5	4	11	5	5	6	10	3	0	4	3
K07190 phosphorylase kinase alpha/beta subunit	0	0	0	0	0	0	1	0	0	0	0	0	2	0	0	0	0	0	0	0	1	0	0	0	0	0	0	0	12	5	5	0	0	0	0	0	1	0	1	1	2	0	1	0	0	0	2	1	1
K04066 primosomal protein N' (replication factor Y) (superfamily II helicase) [EC:3.6.4.-]	32	29	23	6	24	21	15	22	11	10	22	24	13	25	26	2	0	59	9	11	30	23	99	130	25	10	20	28	77	148	18	0	25	37	121	72	20	14	21	17	19	20	20	11	21	27	3	17	21
K21805 protein N-lysine methyltransferase METTL21C [EC:2.1.1.-]	0	0	0	0	0	0	0	0	0	0	0	0	0	0	0	0	0	0	0	0	0	0	0	0	0	0	0	0	0	0	0	1	0	0	0	0	0	0	0	0	0	0	0	0	0	0	0	0	0
K15574 naphthyl-2-oxomethyl-succinyl-CoA thiolase subunit [EC:2.3.1.-]	3	0	0	0	0	2	0	2	1	0	2	0	0	0	1	0	0	7	0	0	0	0	0	10	1	0	0	3	4	12	0	2	0	2	10	0	0	0	0	0	0	0	0	0	0	1	0	1	1
K01853 cycloartenol synthase [EC:5.4.99.8]	0	0	0	0	0	0	0	0	0	0	0	0	0	0	0	0	0	0	0	0	0	0	0	0	0	0	0	0	0	0	0	0	0	0	0	0	0	0	1	0	0	0	0	0	0	0	0	0	0
K03762 MFS transporter, MHS family, proline/betaine transporter	2	4	0	0	0	1	1	0	0	0	0	0	2	0	5	0	0	1	0	1	0	0	0	0	2	0	0	0	0	0	2	1	0	0	0	0	0	2	0	0	0	0	0	0	0	0	1	0	0
K21483 salicylate 1-O-methyltransferase [EC:2.1.1.274]	0	0	0	0	0	0	0	0	0	0	0	0	0	0	0	0	0	0	0	0	0	0	0	0	0	0	0	0	0	0	0	0	0	0	0	0	0	0	0	0	0	0	0	0	0	0	0	0	0
K03495 tRNA uridine 5-carboxymethylaminomethyl modification enzyme	39	29	14	22	12	48	38	20	22	13	19	26	24	35	9	13	19	35	10	13	30	35	80	54	38	25	21	22	66	88	32	12	14	25	39	55	32	20	35	25	27	20	41	13	22	20	22	18	20
K21286 protein N-terminal glutamine amidohydrolase [EC:3.5.1.122]	0	0	0	0	0	0	0	0	0	0	0	0	0	0	0	0	0	0	0	0	0	0	0	0	0	0	0	0	0	0	0	0	0	0	0	0	0	0	0	0	0	0	0	0	0	0	0	0	0
K15240 hydroquinone 1,2-dioxygenase [EC:1.13.11.66]	1	0	0	0	0	0	0	0	0	0	0	0	0	0	0	0	0	0	0	0	0	0	0	0	0	0	0	0	0	0	0	0	0	0	0	0	0	0	0	0	0	0	0	0	0	0	0	0	0
K15669 D-glycero-alpha-D-manno-heptose 1-phosphate guanylyltransferase [EC:2.7.7.71]	0	4	0	2	3	5	0	0	2	4	1	6	0	6	1	0	0	4	0	2	0	0	2	3	0	1	0	0	6	6	2	0	0	5	0	11	1	0	0	0	3	1	2	3	0	1	0	0	0
K09805 uncharacterized protein	0	1	0	0	0	0	0	0	0	0	0	0	0	0	0	3	0	0	0	0	2	0	5	0	0	1	0	0	1	0	0	7	0	0	0	0	0	0	0	0	0	0	0	0	0	0	1	1	0
K20937 1-butanol dehydrogenase (quinone) [EC:1.1.5.11]	0	0	0	0	0	0	0	0	0	0	0	0	1	0	0	0	0	0	0	0	0	0	0	0	0	0	0	0	0	0	0	0	0	0	0	0	0	0	0	0	0	0	0	0	0	0	0	0	0
K17466 D-glucosaminate PTS system EIIC component	0	0	2	0	0	0	1	0	0	0	0	0	0	0	0	0	0	0	0	0	0	0	0	1	0	2	2	0	3	0	0	0	0	0	0	0	0	0	0	2	0	0	0	0	0	0	0	0	0
K14606 lycopene cyclase CruP [EC:5.5.1.19]	0	0	0	0	0	0	0	0	0	0	0	0	0	0	0	0	0	0	0	0	0	0	0	0	0	0	0	0	0	0	0	0	0	0	0	0	1	0	0	1	0	0	0	0	0	0	0	0	0
K20902 D-erythrulose 4-kinase [EC:2.7.1.210]	0	0	0	0	0	1	0	1	0	0	0	0	0	0	0	0	0	0	0	0	0	0	0	0	0	0	0	0	0	0	0	0	0	0	0	0	0	0	0	0	0	0	0	0	0	0	1	0	0
K12574 ribonuclease J [EC:3.1.-.-]	45	23	29	12	50	49	20	28	26	28	51	39	17	23	32	27	14	58	29	18	15	61	120	131	41	24	30	24	108	219	62	17	20	58	196	111	29	31	51	49	79	60	125	49	69	34	25	40	41
K12071 conjugal transfer pilus assembly protein TraD	0	0	1	1	0	0	0	0	0	0	0	0	0	0	0	0	0	0	0	0	1	0	0	0	1	0	0	0	0	0	0	0	0	0	0	0	0	0	1	0	0	1	0	0	0	0	0	0	0
K15051 DNA-entry nuclease	0	0	0	0	0	0	0	0	0	0	0	0	0	0	0	0	0	0	0	0	0	0	0	0	0	0	1	0	0	0	0	0	0	0	0	0	0	0	0	0	0	0	0	0	0	0	0	0	0
K14325 RNA-binding protein with serine-rich domain 1	0	0	0	0	0	0	0	0	0	0	0	0	0	0	0	0	0	0	0	0	0	0	0	0	0	0	0	0	0	0	0	0	0	0	0	0	0	0	0	0	0	0	0	0	0	0	0	0	0
K14158 solute carrier family 5 (sodium/glucose cotransporter), member 1	1	2	0	0	2	1	0	0	2	1	2	0	0	3	0	0	0	0	1	4	1	0	3	0	3	1	2	5	2	0	0	0	2	6	5	9	2	0	2	2	0	0	0	1	2	0	4	0	1
K22502 lycopene beta-cyclase [EC:5.5.1.19]	0	0	0	0	0	0	0	0	0	0	0	0	0	0	0	0	0	0	2	0	0	1	0	0	0	0	0	1	0	0	0	0	0	0	0	0	0	0	0	0	0	0	0	0	0	0	0	0	0
K19426 pyruvyl transferase EpsI [EC:2.-.-.-]	0	0	0	0	1	0	0	0	0	0	0	0	0	0	0	0	0	0	0	0	0	0	0	0	0	0	0	0	0	0	0	0	0	0	0	0	0	0	0	0	1	0	0	0	0	0	0	1	0
K07452 5-methylcytosine-specific restriction enzyme B [EC:3.1.21.-]	4	6	9	3	2	1	2	16	7	3	0	5	4	6	0	11	6	11	3	4	4	6	4	11	8	8	6	4	7	16	10	2	3	6	12	0	9	3	9	2	4	1	2	5	0	3	3	3	2
K20273 zinc metalloprotease ZmpA	0	0	0	0	0	0	0	0	0	0	0	0	0	0	0	0	0	0	0	0	0	0	0	0	0	0	0	0	0	0	0	0	0	0	0	0	0	1	0	0	0	0	0	0	0	0	0	0	0
K03745 SlyX protein	1	0	0	0	0	0	0	0	0	0	0	0	0	1	0	0	0	0	0	0	0	0	0	0	0	0	0	0	0	0	0	0	0	0	0	0	1	0	0	0	0	0	0	0	0	0	0	0	0
K22294 TetR/AcrR family transcriptional regulator, upper aerobic nicotinate degradation pathway regulator	0	0	0	0	0	0	0	0	0	0	0	3	0	0	0	0	0	0	0	0	0	2	0	0	0	0	0	1	0	0	0	0	0	0	0	0	0	1	0	0	0	0	0	0	0	0	0	0	0
K03811 nicotinamide mononucleotide transporter	0	0	1	0	0	0	0	2	0	0	0	0	1	1	0	0	0	0	0	0	0	0	8	3	2	0	0	0	2	5	3	1	5	0	0	11	0	0	0	0	0	0	0	1	0	0	0	0	0
K05814 sn-glycerol 3-phosphate transport system permease protein	23	28	14	13	7	12	14	18	11	4	13	8	19	13	18	3	28	9	12	6	14	19	35	40	24	2	19	14	42	42	40	6	14	19	18	44	10	1	3	7	3	5	10	8	11	8	1	9	3
K00537 arsenate reductase (glutaredoxin) [EC:1.20.4.1]	21	7	7	1	0	4	7	15	3	1	0	1	23	12	6	3	0	0	6	3	4	3	5	0	10	5	0	1	2	4	2	3	0	0	0	0	1	5	0	2	0	0	0	1	2	0	4	4	2
K09945 uncharacterized protein	0	0	0	0	0	0	0	0	0	0	0	0	0	0	0	0	0	0	0	0	0	0	0	0	0	0	0	0	0	0	0	0	0	0	0	0	0	0	0	0	0	1	0	0	0	0	0	1	1
K00912 tetraacyldisaccharide 4'-kinase [EC:2.7.1.130]	6	7	3	5	3	9	6	7	2	1	10	8	7	14	11	7	0	9	4	6	14	11	17	9	9	7	5	7	7	25	7	7	6	9	21	45	22	4	3	4	6	8	5	3	5	3	14	6	7
K03892 ArsR family transcriptional regulator, arsenate/arsenite/antimonite-responsive transcriptional repressor	39	26	67	35	49	53	23	29	38	27	57	53	35	30	45	46	18	72	28	17	35	39	76	70	44	15	34	21	56	76	37	12	33	52	55	37	21	36	59	16	15	13	16	30	9	16	15	29	35
K03336 3D-(3,5/4)-trihydroxycyclohexane-1,2-dione acylhydrolase (decyclizing) [EC:3.7.1.22]	9	9	8	4	13	8	10	5	13	2	10	6	10	10	8	2	2	19	5	9	11	10	19	6	6	9	6	6	23	30	5	5	9	24	18	25	3	5	6	3	4	2	7	3	2	3	4	9	6
K07698 two-component system, sporulation sensor kinase C [EC:2.7.13.3]	2	0	0	0	1	1	2	0	1	8	2	2	1	5	0	0	4	1	2	1	2	1	9	9	1	1	2	1	5	1	0	0	1	5	5	0	0	1	0	1	3	0	2	2	0	1	1	1	0
K07137 uncharacterized protein	17	9	11	8	25	33	7	17	9	5	32	55	10	6	3	15	56	20	23	3	24	12	75	77	20	23	10	22	33	107	26	1	8	12	84	40	24	12	16	7	29	17	15	38	35	21	9	15	11
K13276 bacillopeptidase F [EC:3.4.21.-]	10	11	4	7	6	5	13	10	4	3	4	8	10	3	3	2	1	9	4	2	13	7	20	14	4	0	8	13	18	8	4	3	2	5	21	0	0	5	0	3	6	1	0	2	2	6	0	7	7
K02451 general secretion pathway protein B	0	0	0	0	0	0	0	0	0	0	0	0	0	0	0	0	0	0	0	0	0	0	0	0	0	0	0	0	0	0	0	0	0	0	0	0	3	0	0	0	0	0	0	0	0	0	0	0	0
K08724 penicillin-binding protein 2B	3	3	7	4	6	6	1	12	7	0	1	1	6	9	1	12	0	2	0	1	5	2	6	0	0	1	1	2	3	0	0	3	0	3	0	0	1	1	4	0	1	0	1	2	0	0	0	0	0
K22347 4,4'-dithiodibutanoate disulfide reductase [EC:1.8.1.20]	15	5	8	6	5	7	16	8	2	4	4	6	5	7	2	2	9	10	3	3	3	4	12	23	5	5	2	4	5	24	9	9	3	2	30	1	8	2	1	3	1	2	3	0	3	1	0	2	1
K03972 phage shock protein E	5	10	8	1	14	6	7	8	4	2	4	9	12	6	4	0	21	16	16	33	23	23	22	34	36	27	23	28	28	70	44	18	16	9	19	26	31	51	59	13	22	7	9	4	3	4	9	40	29
K04043 molecular chaperone DnaK	1132	639	271	185	445	740	532	466	343	279	562	688	853	633	404	288	560	751	399	326	485	562	1422	1134	846	353	425	398	1272	2142	866	265	450	755	1453	1134	971	988	1340	292	365	346	450	366	329	387	563	600	559
K21562 CRP/FNR family transcriptional regulator, anaerobic regulatory protein	8	9	0	1	0	0	8	6	3	0	2	0	5	3	5	5	0	5	3	5	5	3	3	12	4	3	0	3	12	8	6	5	4	5	21	1	2	5	3	1	1	2	4	2	1	2	4	3	3
K14746 (S)-1-phenylethanol dehydrogenase [EC:1.1.1.311]	1	0	0	0	0	3	0	0	1	0	0	0	0	0	0	9	0	0	0	0	1	0	0	0	2	0	0	0	0	0	0	0	0	0	0	0	0	0	0	0	0	0	0	0	0	0	0	0	0
K09799 uncharacterized protein	0	0	0	0	1	0	0	0	0	0	0	0	4	0	0	0	0	0	0	0	0	0	0	0	0	0	0	0	4	3	6	0	0	0	0	0	3	1	0	0	1	0	0	0	0	1	1	0	0
K10038 glutamine transport system ATP-binding protein [EC:7.4.2.1]	3	1	0	3	4	9	3	3	1	1	3	1	8	2	0	0	0	3	1	4	2	5	9	7	1	0	1	5	7	0	2	0	2	4	9	0	1	0	4	0	2	1	3	4	5	5	0	1	2
K15551 taurine transport system substrate-binding protein	10	13	7	5	13	5	8	13	11	6	5	7	12	10	19	16	8	13	1	7	10	9	60	9	2	8	12	4	43	34	3	4	9	9	21	38	4	3	2	3	5	1	3	0	1	3	1	8	1
K07058 membrane protein	16	28	7	10	13	21	12	18	17	6	10	18	22	14	11	5	34	18	13	6	13	21	42	52	12	10	9	9	34	56	14	9	11	15	57	40	8	6	9	3	9	10	12	5	11	13	14	11	5
K21028 molybdopterin synthase sulfurtransferase [EC:2.8.1.11]	3	1	2	7	3	0	6	3	3	4	3	0	2	0	0	0	0	2	0	2	1	2	0	1	2	0	0	0	3	2	1	0	0	7	8	0	0	0	2	1	0	0	0	0	0	0	0	0	1
K07242 putative multicomponent Na+:H+ antiporter subunit B	0	0	0	0	0	0	0	0	0	0	0	0	0	0	0	0	0	0	0	0	0	0	0	0	0	0	0	0	0	0	2	0	0	0	0	0	0	0	1	0	0	0	0	0	0	0	0	0	0
K00368 nitrite reductase (NO-forming) [EC:1.7.2.1]	3255	1935	80	34	2	0	2133	1420	115	59	11	4	1985	1423	78	22	0	6	17	16	1	0	0	0	67	18	6	2	2	0	25	16	3	0	0	0	18	23	10	5	3	7	1	1	1	1	20	22	11
K22303 alkyl sulfatase [EC:1.14.11.77]	23	3	0	0	0	0	7	9	1	2	0	0	18	3	1	0	0	0	0	0	0	0	0	0	0	0	3	0	0	0	0	0	0	0	0	0	3	2	2	0	0	0	0	0	0	0	2	2	0
K11231 osomolarity two-component system, sensor histidine kinase SLN1 [EC:2.7.13.3]	0	0	0	0	1	0	0	0	0	0	0	0	0	0	0	0	0	0	0	0	0	0	0	0	0	0	0	0	0	0	0	0	0	0	0	0	0	0	0	0	0	0	0	0	0	0	0	0	0
K14407 cleavage stimulation factor subunit 2	76	83	46	47	59	88	55	53	54	58	41	57	54	65	42	50	44	47	60	43	60	48	170	160	85	59	54	77	113	133	180	37	53	71	150	147	145	109	232	277	310	248	624	303	216	87	103	187	235
K20170 nicotine oxidoreductase [EC:1.5.3.-]	15	10	10	0	17	5	14	8	9	11	7	13	13	7	1	13	0	6	2	2	23	25	35	17	21	9	6	32	32	37	21	7	25	34	72	26	4	4	2	2	0	3	2	0	0	3	1	0	2
K16291 L,D-transpeptidase ErfK/SrfK	9	6	3	3	2	4	5	7	5	1	1	1	7	2	4	0	0	0	4	7	1	1	4	2	9	4	1	2	1	0	6	0	0	3	4	0	3	5	5	3	6	4	2	1	1	0	5	5	5
K11633 two-component system, OmpR family, sensor histidine kinase YxdK [EC:2.7.13.3]	0	0	0	0	0	0	0	0	0	0	0	0	0	0	0	0	0	0	0	0	0	0	0	0	0	0	0	0	0	0	0	0	0	0	0	0	0	0	0	0	0	0	0	0	0	0	0	0	0
K01209 alpha-L-arabinofuranosidase [EC:3.2.1.55]	20	30	44	41	44	39	16	20	33	29	38	43	27	17	32	27	32	35	3	28	31	42	125	104	8	11	36	47	83	189	17	8	50	60	149	153	5	7	17	10	17	11	11	19	19	22	6	20	12
K17776 metaxin	0	0	0	0	0	0	0	0	0	0	0	0	0	0	0	0	0	0	0	0	0	0	0	0	0	2	0	0	0	0	0	0	0	0	0	0	0	0	0	0	0	0	0	0	0	0	0	0	0
K15673 rifamycin polyketide synthase modules 9 and 10	0	0	0	0	0	0	0	1	0	0	1	0	0	0	0	0	0	0	0	0	0	0	0	2	0	0	0	0	6	7	0	2	0	0	0	0	0	1	0	0	0	0	0	0	0	0	0	0	0
K03733 integrase/recombinase XerC	51	68	49	24	66	84	37	61	82	48	70	84	45	79	52	18	55	65	32	30	50	77	265	274	58	30	58	52	195	472	47	26	64	88	315	337	22	44	41	19	63	54	61	39	52	64	20	41	53
K12121 phytochrome B	0	0	0	0	0	0	0	0	0	0	0	0	0	0	0	0	0	0	0	0	0	0	0	0	0	0	0	0	0	0	0	0	0	0	0	0	0	0	0	0	1	0	0	0	0	0	0	0	0
K07547 2-[hydroxy(phenyl)methyl]-succinyl-CoA dehydrogenase BbsC subunit [EC:1.1.1.35]	1	0	0	0	1	0	0	0	0	0	0	0	0	0	0	0	0	0	0	0	0	0	0	0	0	0	0	0	0	0	0	0	0	0	0	0	0	0	0	0	0	0	0	0	0	0	0	0	0
K02838 ribosome recycling factor	118	105	37	36	59	72	53	48	54	38	58	66	70	76	57	47	109	88	50	35	39	46	193	127	80	29	33	69	141	309	72	21	46	76	92	122	58	20	38	15	36	29	33	34	35	48	39	30	53
K13602 bacteriochlorophyllide d C-12(1)-methyltransferase [EC:2.1.1.331]	30	37	12	11	20	29	25	21	13	10	24	19	20	14	11	0	10	26	7	8	8	26	35	53	10	7	13	17	38	46	11	10	25	8	59	30	4	3	13	5	10	5	3	10	6	7	3	8	6
K03153 glycine oxidase [EC:1.4.3.19]	20	21	0	0	7	0	5	9	3	5	5	8	3	6	7	5	5	6	2	1	18	10	11	24	8	3	9	11	12	23	4	1	10	6	17	11	43	7	5	4	7	2	0	2	1	3	17	6	6
K00051 malate dehydrogenase (NADP+) [EC:1.1.1.82]	0	0	0	0	0	0	0	0	0	0	0	0	0	0	0	0	0	0	0	0	0	0	0	0	0	0	0	0	0	0	0	0	0	0	0	0	0	0	0	0	0	0	0	0	0	0	0	0	0
K17067 formaldehyde dismutase / methanol dehydrogenase [EC:1.2.98.1 1.1.99.37]	1	0	0	0	0	0	0	0	1	2	0	0	1	1	0	0	0	0	0	0	0	1	0	0	5	0	0	0	5	4	1	2	0	0	0	0	2	0	0	0	0	0	0	0	0	0	1	1	0
K02856 L-rhamnose-H+ transport protein	16	9	1	8	2	8	2	4	11	4	7	10	6	4	9	2	29	12	2	1	3	10	21	27	5	5	1	3	12	11	4	0	4	3	24	0	3	1	2	2	6	3	3	5	5	5	6	3	1
K00762 orotate phosphoribosyltransferase [EC:2.4.2.10]	31	27	20	16	52	59	21	20	27	24	44	39	19	28	22	17	9	41	20	12	40	64	140	134	36	15	38	45	76	183	32	4	23	62	77	82	16	16	24	16	41	17	19	18	24	34	12	12	20
K24845 O2-independent ubiquinone biosynthesis protein UbiV	0	1	0	0	0	0	0	0	0	0	0	0	0	2	0	0	0	0	0	0	0	0	0	0	0	0	0	0	0	0	0	0	0	0	0	0	0	0	0	0	0	0	0	0	0	0	1	0	0
K07754 thyroxine 5-deiodinase [EC:1.21.99.3]	0	0	0	0	0	0	0	0	0	0	0	0	0	0	0	0	0	0	0	0	0	0	0	0	0	0	0	0	0	3	0	0	0	1	0	0	0	0	0	0	0	0	1	0	0	0	0	0	0
K06199 fluoride exporter	9	12	9	0	2	5	2	5	6	2	0	2	8	9	7	4	0	7	5	1	4	2	4	0	10	7	2	1	1	0	4	1	1	7	0	0	8	1	2	2	3	1	3	3	1	3	4	2	1
K00937 polyphosphate kinase [EC:2.7.4.1]	243	240	129	76	87	101	176	197	119	48	60	84	168	222	119	54	91	87	73	60	83	88	97	63	143	37	40	80	152	107	154	52	38	57	61	96	64	45	58	27	42	28	33	19	20	14	63	57	53
K00893 deoxycitidine/deoxyadenosine/deoxyguanosine kinase [EC:2.7.1.74 2.7.1.76 2.7.1.113]	0	0	0	0	0	1	0	2	0	0	0	0	0	0	0	0	0	0	0	1	1	0	0	0	0	0	0	0	0	8	0	0	0	0	0	0	0	0	1	0	0	0	0	0	0	0	0	0	0
K01857 3-carboxy-cis,cis-muconate cycloisomerase [EC:5.5.1.2]	4	6	1	2	2	2	7	6	6	3	0	0	5	0	1	1	0	1	0	0	2	0	8	9	3	0	3	0	2	8	0	0	0	1	13	0	0	0	0	0	0	0	3	0	0	0	0	1	2
K21619 tagaturonate epimerase [EC:5.1.2.7]	9	2	10	8	6	17	10	3	4	7	9	17	4	7	4	4	0	16	10	6	24	16	48	32	8	5	8	12	18	34	17	3	8	14	18	42	8	4	8	7	6	5	7	8	6	8	4	5	9
K14083 trimethylamine---corrinoid protein Co-methyltransferase [EC:2.1.1.250]	195	326	151	105	184	279	173	308	171	124	197	254	174	246	183	89	156	204	131	82	197	269	503	508	186	101	138	170	488	810	211	79	83	205	514	519	72	40	52	26	72	36	49	19	56	55	49	57	33
K02041 phosphonate transport system ATP-binding protein [EC:7.3.2.2]	28	19	7	5	11	30	19	23	7	4	13	8	21	17	11	8	14	9	17	6	16	24	54	33	14	12	20	18	51	88	9	15	17	31	17	35	5	8	5	5	6	5	5	5	8	8	4	7	2
K07132 ATP-dependent target DNA activator	0	0	1	0	0	0	0	0	0	0	0	0	0	2	0	0	0	0	0	0	0	0	0	0	0	0	0	0	1	0	0	0	0	0	0	0	0	0	0	0	0	0	2	0	0	0	0	0	0
K02205 arginine/ornithine permease	0	0	0	0	0	0	0	0	0	0	0	0	0	0	0	0	0	1	0	0	0	0	0	0	0	0	0	0	0	0	0	0	0	0	0	0	0	0	0	0	0	0	1	0	0	0	0	0	0
K20271 DeoR family transcriptional regulator, repressor of opine catabolism and conjugal transfer	2	1	0	0	0	3	2	0	0	0	0	0	0	2	0	0	0	0	0	1	1	0	0	0	0	1	0	1	7	2	0	0	0	0	2	0	0	0	1	0	1	0	0	0	0	0	0	0	0
K02731 20S proteasome subunit alpha 4 [EC:3.4.25.1]	4	3	2	0	0	0	0	0	0	2	0	0	0	1	0	0	0	1	0	0	0	0	0	0	0	0	1	1	0	0	0	0	1	0	0	0	0	0	0	0	0	0	0	0	0	0	0	0	0
K02881 large subunit ribosomal protein L18	125	94	24	21	65	70	98	69	38	36	74	96	107	78	38	29	120	97	62	21	56	79	209	180	105	35	47	74	216	301	135	33	70	90	321	134	181	47	69	20	86	53	48	40	49	60	89	53	56
K01308 g-D-glutamyl-meso-diaminopimelate peptidase [EC:3.4.19.11]	0	0	0	0	0	0	0	0	0	0	0	0	0	0	0	0	0	0	0	0	0	0	0	0	0	0	0	0	0	0	0	0	0	0	0	0	0	0	0	0	1	0	0	0	0	0	0	0	0
K02115 F-type H+-transporting ATPase subunit gamma	142	111	44	30	53	69	66	70	54	55	57	48	112	117	69	50	73	65	120	46	79	90	147	107	175	55	70	47	227	317	274	67	40	63	131	106	203	51	61	33	57	28	34	28	27	19	78	52	60
K07263 zinc protease [EC:3.4.24.-]	171	133	54	47	95	87	125	82	74	50	99	117	109	162	80	53	47	149	60	49	83	122	226	273	100	52	86	75	197	269	92	53	57	102	222	173	159	89	86	51	86	58	66	57	73	60	78	73	56
K13588 histidine phosphotransferase ChpT	0	1	0	0	0	0	0	0	0	0	0	0	0	1	0	0	0	0	0	0	0	0	0	0	0	0	0	0	0	0	0	0	0	0	0	0	0	0	0	0	0	0	0	0	0	0	0	0	0
K13654 GntR family transcriptional regulator, colanic acid and biofilm gene transcriptional regulator	1	2	6	3	6	0	3	4	1	0	4	0	0	2	3	0	12	3	2	0	0	1	0	4	1	0	1	1	1	3	0	0	2	2	0	0	0	0	0	0	0	2	0	1	0	0	1	1	0
K00064 D-threo-aldose 1-dehydrogenase [EC:1.1.1.122]	18	7	9	4	8	17	17	7	10	4	11	14	19	15	5	1	0	10	3	4	7	16	15	23	8	5	13	15	22	32	10	4	6	10	13	26	2	5	9	3	5	2	8	3	8	4	5	12	4
K16954 methylthiol:coenzyme M methyltransferase [EC:2.1.1.251]	4	0	0	3	4	7	0	1	4	2	3	7	0	3	1	0	0	7	0	0	1	1	18	6	0	0	0	2	4	20	0	1	1	0	11	5	0	0	2	0	0	0	1	0	0	0	2	1	0
K00121 S-(hydroxymethyl)glutathione dehydrogenase / alcohol dehydrogenase [EC:1.1.1.284 1.1.1.1]	46	22	22	21	11	17	34	21	10	18	16	12	37	25	16	5	34	16	12	8	23	15	28	21	13	19	14	13	17	47	3	15	6	22	28	75	11	13	11	8	8	8	8	6	5	6	1	8	10
K05819 MFS transporter, AAHS family, 3-hydroxyphenylpropionic acid transporter	0	0	0	0	0	0	0	0	0	0	0	0	1	0	0	0	0	0	0	0	0	1	0	0	0	0	0	0	0	1	0	0	0	0	0	0	0	0	0	0	0	0	0	0	0	0	0	0	0
K01387 microbial collagenase [EC:3.4.24.3]	4	3	2	0	7	10	4	0	0	3	3	7	4	3	1	0	0	8	3	5	12	3	26	8	1	2	10	11	8	43	1	0	10	12	10	23	0	0	1	1	3	1	2	2	2	2	1	1	1
K09726 uncharacterized protein	2	3	1	2	4	24	5	4	8	6	1	7	3	10	5	9	0	7	4	5	4	2	16	29	2	4	5	2	12	44	11	3	0	9	16	0	1	1	5	1	6	8	6	4	5	5	1	4	5
K00023 acetoacetyl-CoA reductase [EC:1.1.1.36]	74	55	15	9	18	30	25	34	11	18	12	17	47	48	16	25	28	21	13	21	33	32	64	52	41	20	15	31	47	67	46	6	25	37	85	84	63	35	23	13	15	10	15	6	7	5	66	23	35
K13623 S-adenosylmethionine-diacylgycerolhomoserine-N-methlytransferase	1	1	1	0	0	2	0	3	0	0	0	0	0	0	1	0	0	0	0	0	0	0	0	0	0	0	0	0	0	2	0	0	0	0	0	0	0	0	1	0	0	0	0	0	0	0	0	0	0
K08997 serine/tyrosine/threonine adenylyltransferase [EC:2.7.7.-]	51	13	5	0	8	12	18	5	4	2	2	5	14	4	2	18	14	4	11	4	6	6	9	3	15	9	8	3	23	0	13	4	1	3	0	0	7	6	5	1	2	1	0	1	0	0	2	2	8
K06202 iron-sulfur cluster assembly protein CyaY	1	0	0	0	0	0	0	0	0	0	0	0	1	0	0	0	0	0	0	0	0	0	0	0	3	0	0	0	0	0	0	0	0	0	0	0	1	1	0	0	0	0	0	0	0	0	0	0	0
K01141 exodeoxyribonuclease I [EC:3.1.11.1]	6	7	1	0	0	1	7	3	0	2	0	0	6	3	0	0	0	2	2	0	0	1	0	0	3	2	0	1	4	4	13	2	3	0	0	1	1	3	2	0	0	1	0	0	0	0	2	3	2
K15729 microsomal prostaglandin-E synthase 1 [EC:5.3.99.3]	0	0	0	0	0	0	0	0	0	0	0	0	0	0	0	0	0	0	0	0	0	0	0	0	0	0	0	0	0	0	0	0	0	0	0	0	0	0	0	0	0	0	0	0	0	0	0	0	0
K03771 peptidyl-prolyl cis-trans isomerase SurA [EC:5.2.1.8]	38	25	9	4	15	18	19	17	10	12	14	19	29	9	5	17	14	18	22	2	11	19	54	66	36	17	16	14	44	131	23	4	12	13	37	62	18	27	21	7	14	7	21	21	14	20	10	11	22
K18900 LysR family transcriptional regulator, regulator for bpeEF and oprC	5	2	0	1	0	0	0	2	0	0	0	0	4	2	1	0	0	0	0	0	1	0	0	0	6	0	0	0	1	0	0	2	0	1	0	0	1	2	2	0	0	0	0	0	0	0	0	1	3
K11079 mannopine transport system permease protein	9	6	7	7	7	6	2	6	2	7	3	2	1	2	3	2	0	3	5	1	0	2	12	2	5	1	1	1	9	12	4	7	5	0	13	0	0	0	2	0	0	0	0	0	0	0	1	0	0
K09693 teichoic acid transport system ATP-binding protein [EC:7.5.2.4]	6	14	2	0	4	3	3	2	3	1	2	4	1	5	3	6	0	7	0	0	2	2	7	7	3	0	4	1	6	11	6	1	3	6	30	0	5	3	0	0	2	2	4	1	2	0	4	2	2
K01684 galactonate dehydratase [EC:4.2.1.6]	92	88	49	47	71	86	61	59	46	43	43	63	51	64	67	62	50	78	11	30	66	90	159	208	29	25	68	66	112	233	28	42	65	118	162	136	10	10	29	11	42	19	23	24	16	37	16	26	25
K11910 type VI secretion system protein VasJ	1	1	2	3	6	4	5	0	0	0	4	1	0	2	0	2	24	0	1	2	1	0	11	11	0	0	1	0	9	38	0	1	1	4	28	8	6	1	0	0	0	0	2	1	0	0	7	0	1
K07812 trimethylamine-N-oxide reductase (cytochrome c) [EC:1.7.2.3]	14	18	18	18	97	96	11	22	20	20	74	98	7	34	22	19	77	124	31	24	52	102	608	428	16	27	67	79	372	710	42	9	54	166	624	443	14	10	9	3	23	15	41	15	34	39	16	7	10
K01026 propionate CoA-transferase [EC:2.8.3.1]	1	14	1	3	5	3	2	2	1	1	8	10	3	5	3	5	11	4	2	2	2	3	1	8	6	4	3	1	11	9	14	5	4	3	3	3	10	2	2	1	5	3	4	3	4	1	6	9	0
K15719 protein O-GlcNAcase / histone acetyltransferase [EC:3.2.1.169 2.3.1.48]	0	0	0	0	0	0	0	0	0	0	0	0	0	1	0	0	0	0	0	0	0	0	0	0	0	0	0	0	0	0	1	0	0	0	0	0	0	0	0	0	0	0	0	0	0	0	0	0	0
K02682 prepilin peptidase dependent protein D	31	37	17	6	1	0	15	31	16	8	1	7	28	22	12	3	0	1	8	2	0	1	2	0	5	2	0	1	2	4	8	1	0	0	3	0	25	10	1	0	3	4	6	1	0	0	4	5	0
K19422 glycosyltransferase EpsD [EC:2.4.-.-]	5	0	6	0	8	6	0	7	2	2	4	1	1	8	9	0	0	6	3	0	5	7	2	15	3	0	1	1	12	26	4	1	6	6	29	7	2	1	1	1	7	0	3	3	1	1	0	3	0
K18960 recombination endonuclease VII	0	0	0	0	0	0	0	0	0	0	0	0	0	0	0	0	0	0	0	0	0	0	0	0	0	0	0	0	0	0	0	0	0	0	0	0	0	0	0	0	0	0	0	0	0	0	0	0	0
K16555 succinoglycan biosynthesis protein ExoO [EC:2.4.-.-]	2	4	2	0	1	0	0	0	2	1	1	2	4	2	2	0	0	1	0	1	2	0	1	4	2	1	3	0	6	3	1	0	2	0	6	0	0	1	0	1	0	2	0	4	2	1	1	4	1
K00088 IMP dehydrogenase [EC:1.1.1.205]	193	188	68	67	112	139	148	138	97	62	133	110	196	156	70	47	191	139	75	78	120	136	474	351	144	77	84	121	332	483	141	31	133	144	349	272	85	89	99	58	99	64	103	101	74	92	66	99	53
K23402 protein chibby 1	0	0	0	0	0	0	0	0	0	0	0	0	0	0	0	0	0	0	0	0	0	0	0	0	0	0	0	0	0	0	0	0	0	0	0	0	0	0	0	0	0	0	0	0	0	1	0	0	0
K18063 cephamycin C biosynthesis protein	6	1	0	0	0	0	4	2	0	0	0	0	0	0	0	0	0	0	0	0	0	0	0	0	0	1	0	0	0	0	0	0	0	0	0	0	0	0	1	0	0	0	0	0	0	0	0	0	0
K15270 S-adenosylmethionine uptake transporter	5	4	0	0	4	4	2	2	3	0	0	0	4	7	1	0	0	2	4	0	0	3	2	7	7	1	0	3	4	14	6	0	1	0	0	0	1	1	3	0	0	0	1	0	0	0	0	1	2
K11933 NADH oxidoreductase Hcr [EC:1.-.-.-]	0	0	0	0	0	0	0	0	0	0	0	0	0	0	0	0	0	0	0	0	0	2	0	4	0	0	0	0	0	0	1	0	0	0	0	0	1	0	0	0	0	0	1	1	0	0	0	0	1
K20038 choline trimethylamine-lyase [EC:4.3.99.4]	268	647	455	412	466	490	410	568	606	320	427	395	214	532	529	350	443	463	32	44	122	161	463	359	52	37	113	103	386	501	43	26	116	236	378	263	40	40	53	26	68	40	48	50	65	80	37	42	34
K14162 error-prone DNA polymerase [EC:2.7.7.7]	3	5	2	1	3	4	4	7	1	2	3	3	1	7	5	3	0	17	1	4	5	9	41	20	7	4	10	7	14	27	4	1	0	6	20	6	2	3	3	4	4	3	5	1	3	6	2	6	7
K02887 large subunit ribosomal protein L20	185	104	33	46	59	55	68	77	60	56	48	49	139	79	31	75	91	52	71	46	74	78	150	181	117	45	50	46	188	241	158	26	45	75	182	120	151	63	90	29	47	36	36	44	40	39	66	46	39
K01150 deoxyribonuclease I [EC:3.1.21.1]	3	4	0	1	0	3	0	0	0	0	0	0	1	1	1	0	0	0	0	0	3	0	0	0	2	0	0	0	1	0	1	1	0	1	0	13	3	0	1	0	0	0	0	0	0	0	0	2	1
K13960 ubiquitin-conjugating enzyme E2 T [EC:2.3.2.23]	0	0	0	0	0	0	0	0	0	1	0	0	0	0	0	0	0	0	2	2	0	1	0	4	1	0	4	2	1	5	0	0	3	2	0	0	0	0	0	0	1	2	1	0	0	2	0	0	0
K15835 RpiR family transcriptional regulator, murPQ operon repressor	0	2	2	0	0	0	0	4	0	0	0	0	0	0	0	0	0	0	0	2	0	0	0	0	0	0	0	0	2	0	2	0	1	0	0	0	0	0	0	0	0	0	2	0	0	0	2	2	1
K03021 DNA-directed RNA polymerase III subunit RPC2 [EC:2.7.7.6]	0	0	0	0	0	0	0	0	0	0	0	0	0	0	0	0	0	0	0	0	0	0	0	0	0	0	0	0	0	0	0	0	0	0	0	0	0	0	0	0	0	0	0	0	0	0	0	0	0
K00163 pyruvate dehydrogenase E1 component [EC:1.2.4.1]	83	46	25	6	8	12	25	48	21	12	8	5	67	26	7	4	16	5	35	4	33	17	3	6	30	18	9	21	20	11	34	22	15	16	9	0	97	22	14	5	3	3	8	6	3	1	37	23	18
K10717 cytokinin trans-hydroxylase	0	0	0	0	0	0	0	0	0	0	0	0	0	0	0	0	0	0	0	0	0	0	0	0	0	0	0	0	0	0	0	0	0	0	0	0	0	0	0	0	0	0	0	0	0	0	0	0	0
K00395 adenylylsulfate reductase, subunit B [EC:1.8.99.2]	144	211	458	338	620	582	122	259	524	371	460	381	86	299	417	393	690	586	467	325	406	406	402	219	865	378	340	337	775	740	787	267	287	392	425	301	945	387	307	171	407	177	104	23	21	25	512	382	258
K11932 universal stress protein G	7	6	10	1	0	1	12	9	6	3	1	3	12	13	7	0	0	0	6	6	3	13	11	5	2	2	7	8	12	17	12	5	0	5	22	23	1	1	0	0	2	5	3	5	4	3	3	1	1
K00046 gluconate 5-dehydrogenase [EC:1.1.1.69]	77	55	31	33	28	63	40	49	33	47	24	91	70	56	45	25	64	60	44	24	58	62	192	189	41	22	43	41	123	372	37	15	45	75	228	265	17	8	32	9	34	18	21	27	31	18	19	24	7
K01879 glycyl-tRNA synthetase beta chain [EC:6.1.1.14]	31	25	11	12	22	22	23	26	21	24	29	5	16	27	9	2	6	13	27	19	24	15	61	47	37	16	12	10	77	50	39	22	16	23	49	13	46	25	12	14	25	11	13	13	20	11	19	18	14
K00992 N-acetyl-alpha-D-muramate 1-phosphate uridylyltransferase [EC:2.7.7.99]	2	9	2	3	1	1	6	5	6	3	5	5	5	12	4	7	11	9	3	1	11	5	1	3	4	1	7	0	6	16	20	0	0	3	0	15	5	1	6	0	2	1	2	0	1	0	0	1	3
K21311 norbelladine O-methyltransferase [EC:2.1.1.336]	0	0	0	0	0	0	0	0	0	0	0	0	0	0	0	0	0	0	0	0	1	0	0	0	0	0	0	0	0	0	0	0	0	0	0	0	0	0	0	0	0	0	0	0	0	0	0	0	0
K11162 retinol dehydrogenase 14 [EC:1.1.1.-]	3	2	2	0	2	1	2	5	1	0	0	0	4	2	5	0	0	4	1	5	1	1	1	3	1	0	0	0	4	6	0	0	0	0	0	0	2	1	3	0	1	2	0	0	0	0	1	1	0
K12665 cytochrome P450 family 26 subfamily C [EC:1.14.14.-]	0	0	0	0	0	0	0	0	0	0	0	0	0	0	0	0	0	0	0	0	0	0	0	0	0	0	0	0	0	0	0	1	0	0	0	0	0	0	0	0	0	0	0	0	0	0	0	0	0
K00612 carbamoyltransferase [EC:2.1.3.-]	119	79	35	35	26	42	43	57	30	22	35	34	69	90	47	22	42	54	32	32	37	55	80	85	44	35	30	31	106	218	62	18	21	45	79	90	36	16	16	7	20	19	8	10	9	14	15	12	19
K21729 (R)-dichlorprop dioxygenase (2-oxoglutarate) [EC:1.14.11.44]	4	1	3	0	0	0	3	1	0	0	0	0	2	2	0	0	0	0	0	0	0	0	0	0	1	0	0	0	0	0	0	0	0	0	0	0	0	0	0	0	0	0	0	0	0	0	0	0	0
K11624 two-component system, NarL family, response regulator YdfI	7	2	2	1	4	5	3	4	0	2	2	0	2	12	3	0	0	1	4	8	2	3	8	13	4	4	1	1	10	12	6	7	0	6	1	7	1	0	5	0	2	0	0	1	0	1	1	3	2
K07689 two-component system, NarL family, invasion response regulator UvrY	25	15	2	5	4	7	7	6	9	4	5	5	8	10	6	8	0	4	5	3	12	4	18	17	7	5	5	1	17	23	19	4	3	11	6	1	8	8	7	0	7	3	7	4	5	4	3	6	9
K00545 catechol O-methyltransferase [EC:2.1.1.6]	4	0	0	0	0	0	0	1	0	0	0	0	0	0	0	0	0	2	0	0	0	0	0	0	0	0	0	0	0	0	0	0	0	0	0	0	0	0	1	0	0	2	0	0	0	0	0	1	0
K02774 galactitol PTS system EIIB component [EC:2.7.1.200]	0	1	0	1	0	0	0	1	0	0	0	3	0	0	3	6	0	0	0	0	1	3	9	0	7	0	1	3	2	5	3	0	0	0	0	0	0	2	0	0	4	0	1	2	2	1	1	2	0
K03008 DNA-directed RNA polymerase II subunit RPB11	0	0	0	0	0	0	0	0	0	0	0	1	0	0	0	0	0	0	0	0	0	0	0	0	0	0	0	0	0	0	0	0	0	0	0	0	0	0	0	0	0	0	0	0	0	0	0	0	0
K00040 fructuronate reductase [EC:1.1.1.57]	0	0	0	0	0	2	0	2	0	0	0	1	0	1	1	0	0	0	0	0	0	7	12	24	0	2	0	0	3	0	1	0	1	4	8	0	0	0	0	1	0	1	0	0	0	0	0	0	0
K19275 aminoglycoside 3-N-acetyltransferase II [EC:2.3.1.81]	0	0	0	0	0	0	0	0	0	0	0	0	0	0	0	0	0	0	0	0	0	0	0	1	0	0	1	0	0	8	0	0	1	0	0	0	0	0	0	0	0	1	0	0	0	0	0	1	1
K18330 NADP-reducing hydrogenase subunit HndA [EC:1.12.1.3]	11	28	12	10	27	24	16	6	18	7	18	18	8	27	8	20	23	38	6	13	18	24	108	59	28	17	18	21	103	66	30	12	12	30	96	99	27	15	16	8	22	15	11	12	15	20	12	16	9
K04659 thrombospondin 2/3/4/5	0	0	0	0	0	0	0	0	0	0	0	0	0	0	0	0	0	0	0	0	0	0	0	0	0	0	0	0	0	0	0	0	0	0	0	0	0	1	0	0	0	0	0	0	0	0	0	0	0
K10816 hydrogen cyanide synthase HcnC [EC:1.4.99.5]	0	1	0	0	0	0	0	0	0	0	0	0	0	0	0	0	0	0	0	0	0	0	0	0	0	0	0	2	0	0	0	1	0	0	0	0	0	0	0	0	0	0	0	1	0	0	0	0	0
K10456 kelch-like protein 19	0	0	0	0	0	0	0	0	0	0	0	0	0	0	0	0	0	0	0	0	0	0	0	0	0	0	2	0	0	0	0	0	0	0	0	0	0	0	0	0	0	0	0	0	0	0	0	0	0
K03523 biotin transport system substrate-specific component	2	4	2	5	2	10	3	3	4	3	8	9	6	8	3	2	13	10	4	1	8	13	34	29	4	0	10	12	14	45	2	4	3	9	58	20	1	5	10	5	10	5	4	2	2	9	3	5	5
K08944 bacteriochlorophyll A protein	0	0	0	0	0	0	0	0	0	0	0	0	0	0	0	0	0	0	0	0	0	0	0	0	1	0	0	0	0	0	3	0	0	0	0	0	0	0	0	0	0	0	0	0	0	0	0	0	0
K23107 1-deoxyxylulose-5-phosphate synthase [EC:1.1.-.-]	3	1	1	0	0	0	0	1	0	1	2	0	0	0	0	0	16	2	0	1	1	1	4	3	0	0	1	1	1	0	0	0	0	5	3	20	0	1	1	0	0	0	0	0	1	0	0	1	1
K08945 chlorosome envelope protein A	0	0	0	0	0	0	0	0	0	0	0	0	0	0	0	0	0	0	3	0	0	0	0	0	3	0	0	0	0	0	2	0	0	0	0	0	0	0	0	0	0	0	0	0	0	0	0	0	0
K08312 ADP-ribose diphosphatase [EC:3.6.1.-]	4	1	0	0	0	1	0	1	1	1	0	0	0	0	1	0	0	0	0	0	0	0	8	0	3	1	0	1	0	0	0	4	0	0	0	1	1	2	0	1	1	1	0	1	1	0	2	0	0
K00857 thymidine kinase [EC:2.7.1.21]	17	18	4	4	18	17	14	9	10	5	6	13	9	11	4	0	14	11	5	2	7	7	35	13	7	4	7	7	23	34	17	8	2	9	5	12	3	6	8	3	11	4	6	7	6	8	8	3	9
K19068 UDP-2-acetamido-2,6-beta-L-arabino-hexul-4-ose reductase [EC:1.1.1.367]	0	0	2	0	1	2	0	1	0	2	4	0	1	4	2	0	0	0	0	1	5	3	11	49	2	5	0	1	7	42	5	0	0	4	9	0	3	5	3	0	1	0	3	1	3	2	4	0	1
K11891 type VI secretion system protein ImpL	4	12	21	18	21	15	7	16	12	10	8	15	9	9	14	8	9	17	15	14	16	18	18	33	15	25	9	26	22	32	7	5	9	17	7	1	13	6	4	3	9	5	3	7	2	2	9	5	6
K03387 NADH-dependent peroxiredoxin subunit F [EC:1.8.1.-]	10	12	10	5	14	23	13	11	24	12	11	33	10	13	12	16	16	21	16	6	19	29	62	70	31	17	15	26	77	85	12	5	23	27	105	36	5	18	13	5	9	10	6	2	10	14	5	5	7
K01414 oligopeptidase A [EC:3.4.24.70]	20	7	3	5	4	1	14	6	4	4	4	3	10	10	2	0	0	7	4	3	2	9	1	2	15	3	3	6	5	13	35	3	0	3	0	0	18	13	9	1	4	8	4	5	1	0	10	6	4
K09004 uncharacterized protein	82	28	6	7	2	0	21	29	3	2	0	0	70	27	4	0	0	1	3	1	12	3	0	0	24	15	1	3	3	4	9	1	9	0	3	0	9	9	8	2	1	2	0	0	2	1	1	5	3
K19696 5'-methylthioinosine phosphorylase [EC:2.4.2.44]	0	0	0	0	0	2	1	0	0	0	0	0	0	3	0	4	0	0	1	1	0	1	1	4	0	1	0	0	5	8	6	1	0	1	6	0	5	4	0	0	0	1	0	0	0	2	3	1	1
K12912 phosphinothricin tripeptide synthetase phsB [EC:6.2.1.67]	7	0	1	0	1	1	1	0	0	1	0	0	5	1	0	5	0	0	0	0	0	0	2	0	2	0	2	1	2	37	0	0	0	0	1	0	0	0	1	0	0	0	0	0	0	0	0	0	0
K02709 photosystem II PsbH protein	0	0	0	0	0	0	0	0	0	0	0	0	0	0	0	0	0	0	1	1	0	0	0	0	0	0	0	0	0	0	0	0	0	0	0	0	7	1	0	0	0	0	0	0	0	0	1	2	1
K23499 required for meiotic nuclear division protein 1	0	0	0	0	0	0	0	0	0	0	0	0	0	0	0	0	0	0	0	0	0	0	0	0	0	0	0	0	0	0	0	0	0	0	0	0	0	0	0	0	0	0	0	1	0	0	0	0	1
K00297 methylenetetrahydrofolate reductase (NADH) [EC:1.5.1.54]	111	121	88	62	114	146	94	94	91	101	94	149	93	99	96	42	88	138	129	106	188	247	455	414	173	106	144	147	526	709	261	85	162	228	439	433	232	90	83	49	90	83	98	47	42	66	135	104	73
K21260 calicheamicin 4-deoxy-4-thio-alpha-D-digitoxosyltransferase [EC:2.4.1.-]	2	0	0	0	0	0	0	0	0	0	0	2	0	0	0	0	0	0	0	0	0	0	0	0	0	0	0	1	0	0	0	0	0	0	0	0	0	0	0	0	0	0	0	0	0	0	0	0	0
K10188 lactose/L-arabinose transport system substrate-binding protein	4	18	6	16	40	17	4	2	13	10	5	13	0	10	4	6	49	10	12	1	22	14	16	48	12	3	18	13	19	48	2	1	21	23	61	151	3	1	3	3	15	16	44	151	274	176	2	6	1
K03433 proteasome beta subunit [EC:3.4.25.1]	16	10	6	1	43	88	8	9	20	21	72	105	3	11	13	3	12	55	0	14	28	87	135	178	18	11	42	55	82	224	6	9	35	66	158	100	8	8	22	15	42	31	43	17	30	50	4	8	15
K16326 CRP/FNR family transcriptional regulator, putaive post-exponential-phase nitrogen-starvation regulator	0	0	0	0	0	0	0	0	0	0	0	0	0	0	0	0	0	0	0	0	0	0	0	0	0	0	0	0	0	0	0	0	0	0	0	0	0	0	1	0	0	0	0	0	0	0	0	0	0
K08942 photosystem P840 reaction center cytochrome c551	0	0	0	0	0	0	0	0	0	0	0	0	0	0	0	0	0	0	0	0	0	0	0	0	0	0	0	0	0	0	1	0	0	0	0	0	0	0	0	0	0	0	0	0	0	0	0	0	0
K19158 toxin YoeB [EC:3.1.-.-]	8	4	9	1	10	4	3	14	1	1	0	2	7	13	6	0	0	1	5	6	5	7	7	4	10	5	8	11	12	17	21	0	1	4	21	1	68	10	6	4	2	3	6	1	4	2	41	12	10
K14379 tartrate-resistant acid phosphatase type 5 [EC:3.1.3.2]	4	0	0	0	0	0	0	0	1	0	0	0	3	0	1	0	1	2	0	0	0	0	0	5	0	0	0	0	2	0	0	0	0	1	0	0	1	0	2	0	0	1	0	0	1	0	1	1	1
K05785 transcriptional antiterminator RfaH	8	9	2	5	17	9	7	5	3	6	5	10	4	4	4	0	0	1	1	1	2	0	14	21	9	3	1	4	25	31	1	1	5	15	10	16	1	4	2	2	2	5	0	2	3	1	1	4	3
K03214 RNA methyltransferase, TrmH family [EC:2.1.1.-]	0	0	0	0	0	0	0	0	0	0	0	0	0	0	0	0	0	0	0	0	0	0	0	0	0	0	0	0	0	0	0	0	0	0	0	0	0	1	0	0	0	0	0	0	0	0	0	0	0
K13583 GcrA cell cycle regulator	5	1	0	0	0	0	3	1	0	0	0	0	6	1	0	0	0	0	0	0	0	0	0	0	0	0	0	0	0	0	2	0	0	0	0	0	0	0	0	0	0	0	0	0	0	0	0	1	0
K07785 MFS transporter, NRE family, putaive nickel resistance protein	0	0	4	0	0	0	0	0	0	0	0	0	0	0	0	0	0	0	0	0	0	0	0	0	0	0	0	0	0	0	0	1	0	0	0	0	0	0	0	0	0	0	0	0	0	0	0	0	1
K19227 cationic peptide transport system permease protein	0	0	0	0	0	0	0	0	0	0	0	0	0	0	0	0	0	0	0	0	0	0	0	0	0	0	0	0	0	0	0	0	0	1	0	0	0	0	0	0	0	0	0	0	0	0	0	0	0
K18827 O-antigen chain-terminating bifunctional methyltransferase/kinase [EC:2.1.1.- 2.1.1.294 2.7.1.181]	2	2	0	0	0	0	0	3	0	0	0	1	0	0	0	0	0	0	0	0	1	1	13	0	1	0	0	0	0	0	1	0	0	0	8	0	3	0	0	0	0	0	2	1	2	0	4	1	1
K23077 dissimilatory sulfite reductase related protein	19	19	4	11	7	5	16	9	14	17	21	6	23	24	11	10	9	5	60	15	16	10	8	24	63	26	16	11	34	9	66	19	15	8	0	0	33	27	9	7	4	12	6	0	1	2	18	20	16
K18371 acetone monooxygenase (methyl acetate-forming) [EC:1.14.13.226]	12	1	0	0	0	0	4	4	0	1	0	0	3	3	1	0	0	0	0	1	0	0	0	0	1	0	0	0	0	0	0	1	1	0	0	0	1	1	0	0	0	0	0	0	0	0	0	0	0
K16147 starch synthase (maltosyl-transferring) [EC:2.4.99.16]	4	10	0	2	1	11	1	7	3	1	3	2	9	3	10	3	12	11	16	2	14	5	16	16	15	3	12	19	19	19	26	7	3	9	11	23	16	13	13	6	22	14	10	7	13	12	9	15	6
K05681 ATP-binding cassette, subfamily G (WHITE), member 2	0	0	0	0	0	0	0	0	0	0	0	0	0	0	0	0	0	0	0	0	1	2	0	0	1	0	0	0	0	0	0	0	0	0	0	0	0	0	0	0	0	0	0	0	0	0	0	0	0
K01066 acetyl esterase [EC:3.1.1.-]	17	15	5	6	2	4	15	8	4	3	11	8	15	12	11	17	0	8	6	6	9	8	16	23	7	6	6	9	20	21	9	2	1	15	16	45	7	3	5	0	6	3	5	3	4	3	6	6	2
K09144 uncharacterized protein	5	8	6	1	6	4	4	4	3	3	3	0	3	2	1	1	0	5	3	3	9	6	8	4	3	0	3	8	15	18	7	2	11	10	0	0	2	2	5	3	7	1	5	6	10	3	5	5	7
K02395 peptidoglycan hydrolase FlgJ	5	0	1	0	0	0	2	0	0	0	0	0	3	0	2	0	0	0	2	0	0	2	1	0	5	5	1	0	5	5	5	2	0	0	0	0	4	2	2	1	0	0	1	3	3	3	0	2	1
K00244 fumarate reductase flavoprotein subunit [EC:1.3.5.4]	27	29	23	7	22	22	23	28	10	16	31	16	21	48	14	12	35	21	13	13	19	27	53	82	32	17	18	17	79	119	32	10	23	35	24	49	67	15	14	12	13	16	18	27	19	5	21	22	14
K04649 ubiquitin-conjugating enzyme (huntingtin interacting protein 2) [EC:2.3.2.23]	0	1	1	1	0	3	1	0	0	0	0	0	1	0	0	0	0	0	2	0	0	3	0	2	0	0	0	1	0	5	1	0	0	2	0	0	0	2	3	1	1	6	1	0	0	0	0	1	2
K02433 aspartyl-tRNA(Asn)/glutamyl-tRNA(Gln) amidotransferase subunit A [EC:6.3.5.6 6.3.5.7]	87	74	24	31	73	96	47	46	70	39	77	71	71	62	53	21	91	110	25	46	61	104	226	149	58	27	54	62	177	361	87	23	60	76	188	145	71	30	31	19	46	31	48	37	23	28	42	32	34
K02075 zinc/manganese transport system permease protein	2	1	0	7	1	9	0	0	0	0	3	9	2	1	0	0	0	5	4	16	10	18	32	59	3	9	10	21	24	37	3	8	14	10	75	23	3	8	10	5	9	4	2	5	5	1	1	4	1
K03642 rare lipoprotein A	27	7	10	4	6	6	8	8	11	8	13	6	5	15	7	4	0	8	14	12	2	18	3	44	9	7	9	6	24	13	14	7	18	16	26	0	14	21	12	10	6	9	10	9	15	7	8	11	16
K18988 serine-type D-Ala-D-Ala carboxypeptidase/endopeptidase [EC:3.4.16.4 3.4.21.-]	2	0	1	0	0	1	0	0	0	0	0	3	0	4	0	1	0	5	0	0	2	2	0	3	2	0	1	0	0	0	0	0	0	0	0	0	0	0	0	0	1	0	0	0	1	0	0	1	0
K03704 cold shock protein	914	653	334	355	439	614	520	559	332	328	449	612	703	611	359	340	498	493	479	325	544	630	1483	1274	821	403	463	467	1045	1591	925	230	563	507	1204	1052	574	432	488	246	423	383	357	315	290	413	382	410	337
K18023 membrane-bound hydrogenase subunit mbhJ [EC:1.12.7.2]	0	0	2	5	2	2	0	1	3	3	5	3	0	2	0	1	29	3	0	3	2	1	23	32	3	8	5	5	28	56	0	4	12	3	11	48	3	1	3	2	4	5	5	3	6	10	0	4	1
K13419 serine/threonine-protein kinase PknK [EC:2.7.11.1]	0	0	0	0	0	1	0	0	0	0	1	0	0	0	0	0	0	0	0	0	0	0	0	0	0	0	0	0	0	0	0	0	0	0	0	0	0	1	0	0	0	1	0	0	0	0	0	0	1
K11901 type VI secretion system protein ImpB	95	69	37	31	57	79	49	80	60	51	87	71	84	74	51	40	122	84	48	42	38	48	112	103	56	20	41	52	129	238	69	46	37	54	145	73	56	25	23	13	37	38	40	7	26	23	38	36	27
K09722 4-phosphopantoate---beta-alanine ligase [EC:6.3.2.36]	0	0	0	0	1	3	0	0	0	2	6	6	0	0	0	0	0	3	2	0	0	8	18	10	0	1	4	8	27	36	0	0	5	6	23	0	0	1	1	2	4	4	6	3	2	1	0	1	0
K00802 spermine synthase [EC:2.5.1.22]	0	0	0	0	0	0	0	0	0	0	0	0	0	0	0	0	0	0	0	0	0	0	0	0	0	0	0	0	0	0	0	0	0	0	0	0	0	0	0	0	0	0	0	0	1	2	0	0	0
K01727 hyaluronate lyase [EC:4.2.2.1]	0	0	1	0	0	3	0	0	1	0	2	0	2	0	0	0	5	0	2	1	0	0	1	0	0	1	0	7	0	1	0	0	0	4	2	0	1	0	2	2	0	1	3	1	0	0	0	0	0
K11031 thiol-activated cytolysin	0	0	0	0	0	0	1	0	1	0	0	0	1	0	2	0	0	0	0	0	0	0	0	0	0	0	0	0	0	0	1	0	0	3	3	0	0	0	0	0	0	1	1	1	0	0	1	1	2
K07091 lipopolysaccharide export system permease protein	9	14	4	5	1	10	9	4	11	3	5	16	7	8	10	6	21	7	7	7	10	5	29	36	11	6	10	14	27	23	15	7	10	8	17	15	1	8	17	5	8	3	5	10	8	7	2	5	6
K03455 monovalent cation:H+ antiporter-2, CPA2 family	22	11	2	3	8	8	9	7	23	3	12	7	9	10	4	15	0	23	10	3	7	10	20	24	21	12	18	18	20	38	23	10	20	16	22	16	9	11	14	9	14	7	8	11	8	8	5	14	15
K21017 cocaine esterase [EC:3.1.1.84]	13	9	9	2	15	20	10	8	5	2	1	13	12	6	4	11	17	6	1	1	15	29	54	71	12	8	12	19	21	67	4	5	13	19	63	112	0	3	4	0	4	3	6	6	9	6	2	2	6
K16185 Ras-related GTP-binding protein A/B	0	1	0	1	8	28	0	0	3	1	25	26	0	2	1	0	23	35	3	10	49	37	127	161	8	2	45	39	93	157	4	15	53	63	163	39	8	5	6	5	34	10	12	13	9	36	3	6	12
K00230 menaquinone-dependent protoporphyrinogen oxidase [EC:1.3.5.3]	2	4	2	2	1	4	2	0	4	1	3	1	2	2	11	1	0	13	5	0	7	4	10	22	11	3	3	13	17	11	3	3	8	2	19	13	2	2	6	0	9	6	7	7	6	12	3	7	3
K15756 2-hydroxy-6-oxo-6-(2'-aminophenyl)hexa-2,4-dienoate hydrolase [EC:3.7.1.13]	0	0	0	0	0	0	1	0	0	1	0	0	0	0	0	0	0	0	0	0	0	0	0	0	1	0	1	0	0	0	0	1	0	2	0	0	3	0	2	0	1	0	0	0	0	0	0	1	0
K15598 putative hydroxymethylpyrimidine transport system substrate-binding protein	6	2	3	3	5	7	7	4	3	0	5	25	4	7	0	0	6	9	7	0	0	2	1	12	7	0	1	7	6	11	2	0	2	9	7	0	1	0	1	1	2	1	0	5	5	9	1	6	0
K16844 (2R)-3-sulfolactate dehydrogenase (NADP+) [EC:1.1.1.338]	3	3	4	5	13	17	0	5	3	4	19	7	6	6	3	2	11	12	1	5	3	17	34	25	3	6	4	7	9	31	11	8	1	8	30	25	1	1	0	3	0	0	3	0	1	2	3	4	2
K07533 foldase protein PrsA [EC:5.2.1.8]	13	17	3	8	11	13	9	21	9	4	13	11	33	26	12	15	0	5	2	6	8	24	21	30	7	7	4	7	25	85	11	10	2	9	7	19	2	8	7	4	9	8	9	5	18	7	2	4	2
K05581 NAD(P)H-quinone oxidoreductase subunit J [EC:7.1.1.2]	2	0	0	1	0	2	0	0	0	0	0	0	3	1	0	0	1	2	0	0	3	0	1	1	0	0	1	0	1	2	1	0	0	0	4	0	5	0	1	2	1	1	5	1	0	0	1	3	1
K01250 pyrimidine-specific ribonucleoside hydrolase [EC:3.2.-.-]	6	4	4	1	9	8	3	1	8	3	2	7	8	2	3	0	0	3	5	0	10	2	26	35	3	1	4	1	9	26	0	3	15	19	10	12	2	0	3	1	3	2	2	5	2	4	3	0	1
K17687 cytochrome P450 family 4 subfamily A11 [EC:1.14.14.1]	0	0	0	0	0	0	0	0	0	0	0	0	0	0	0	0	0	0	0	0	0	0	0	0	0	0	0	0	0	0	0	0	0	0	0	0	0	0	0	0	0	0	0	0	0	0	0	1	0
K13497 anthranilate synthase/phosphoribosyltransferase [EC:4.1.3.27 2.4.2.18]	1	0	0	2	0	0	1	0	0	0	1	0	1	2	0	0	0	0	0	0	1	0	7	10	0	0	3	0	2	8	0	0	0	6	0	2	2	0	0	0	0	0	1	0	0	1	0	1	1
K10547 putative multiple sugar transport system permease protein	0	0	0	0	0	0	0	0	0	0	0	2	0	2	3	0	0	0	4	0	2	4	1	6	1	1	1	2	5	0	1	1	0	1	0	0	1	3	9	0	1	1	0	8	1	2	5	1	0
K20023 L-talarate/galactarate dehydratase [EC:4.2.1.156 4.2.1.42]	5	12	9	8	14	15	16	5	2	14	7	7	5	9	13	7	8	8	2	4	16	16	41	20	4	6	15	7	14	39	2	4	5	23	14	36	1	0	1	4	11	8	3	10	2	3	2	5	1
K15227 arogenate dehydrogenase (NADP+), plant [EC:1.3.1.78]	0	0	0	0	0	4	1	1	0	0	0	0	0	1	0	0	1	0	0	0	0	0	0	0	2	2	0	0	0	2	0	4	0	0	0	18	2	1	0	0	0	0	0	0	0	0	0	0	1
K05813 sn-glycerol 3-phosphate transport system substrate-binding protein	180	184	123	65	93	103	102	149	98	54	75	81	144	128	124	75	74	91	114	124	138	191	255	244	133	89	111	148	278	326	155	80	80	141	172	241	185	74	89	71	136	123	147	275	407	226	94	109	73
K13449 pathogenesis-related protein 1	0	2	0	0	0	0	0	0	0	0	0	0	0	0	4	0	0	0	0	0	2	0	0	0	1	1	0	0	0	0	3	0	0	0	0	0	8	2	1	2	0	1	0	0	0	0	3	2	3
K20568 neamine transaminase / 2'-deamino-2'-hydroxyneamine transaminase [EC:2.6.1.93 2.6.1.94]	0	0	1	0	0	0	0	0	0	1	0	0	0	0	0	0	0	0	0	0	0	0	0	0	0	0	0	0	0	0	0	0	0	0	0	0	0	0	0	0	0	0	0	0	0	0	0	0	0
K03489 GntR family transcriptional regulator, transcriptional regulator of bglA	0	0	0	1	0	0	0	0	0	0	0	0	0	0	0	0	0	0	0	0	0	0	0	0	0	0	0	0	0	0	0	0	0	0	0	0	0	0	0	0	0	0	0	0	0	0	0	0	0
K21023 diguanylate cyclase [EC:2.7.7.65]	46	49	33	4	13	15	31	42	28	33	11	14	49	29	18	12	9	5	9	8	20	16	11	20	48	18	5	17	51	59	67	14	15	10	17	47	54	19	14	6	11	9	11	14	10	6	28	20	12
K19203 pimaricinolide synthase PimS1	0	0	0	0	0	0	0	0	0	1	0	0	1	0	0	0	0	1	0	0	0	0	0	0	0	0	0	0	0	0	0	0	0	0	0	0	0	0	0	0	0	0	0	0	0	0	0	0	0
K17360 acyl-coenzyme A thioesterase 7 [EC:3.1.2.2]	0	0	0	0	0	0	0	3	0	0	0	0	0	1	0	0	0	0	0	0	0	0	0	0	0	2	2	0	0	0	0	0	0	0	0	0	0	0	0	1	0	0	0	0	0	0	0	0	0
K09787 uncharacterized protein	0	0	0	0	0	0	0	0	0	0	0	0	0	0	0	0	0	6	0	0	0	0	0	0	0	0	0	0	0	0	0	0	0	0	11	0	0	0	0	0	0	0	0	2	0	0	0	0	1
K20115 [pyruvate, phosphate dikinase]-phosphate phosphotransferase / [pyruvate, phosphate dikinase] kinase [EC:2.7.4.27 2.7.11.32]	2	1	0	2	0	7	1	0	0	0	0	0	2	2	0	0	0	0	1	0	2	0	0	0	3	0	1	0	1	1	4	0	0	2	18	0	0	1	0	0	0	0	1	0	0	0	0	0	1
K17736 AraC family transcriptional regulator, carnitine catabolism transcriptional activator	4	1	0	0	0	0	0	0	0	0	0	0	1	1	0	0	0	0	0	0	0	0	0	0	1	0	0	0	0	0	0	0	0	0	0	0	0	0	0	0	0	0	0	0	0	0	0	0	0
K06189 hemolysin (HlyC) family protein	18	13	4	7	11	4	10	11	5	1	22	3	4	3	3	20	16	10	5	0	19	10	32	33	13	6	9	6	16	16	3	1	9	6	1	6	28	2	6	0	5	8	6	3	1	5	7	4	5
K03093 RNA polymerase sigma factor	11	12	9	3	3	8	11	14	1	3	3	9	6	9	6	3	0	4	6	2	7	7	1	13	0	2	2	5	12	1	4	6	3	5	0	0	0	2	3	1	1	3	1	1	0	0	2	4	1
K16412 stigmatellin polyketide synthase StiH	3	7	1	3	5	11	1	2	0	2	2	4	1	4	6	8	1	3	5	1	4	2	12	10	2	1	5	4	14	59	2	0	8	7	3	11	11	1	1	1	0	0	1	1	0	0	1	2	1
K00853 L-ribulokinase [EC:2.7.1.16]	13	21	17	12	29	27	4	21	20	17	21	13	19	15	25	23	13	30	12	2	21	28	65	76	12	15	32	27	59	146	14	4	19	33	136	165	10	9	9	8	14	14	14	8	19	12	9	10	8
K18675 N,N'-diacetylchitobiose phosphorylase [EC:2.4.1.280]	8	5	4	1	2	2	5	6	6	5	2	1	7	7	3	1	9	3	6	0	4	11	30	14	13	5	6	7	17	11	20	2	0	6	19	29	4	2	8	1	5	2	1	2	1	4	3	3	0
K16876 2-furoate---CoA ligase [EC:6.2.1.31]	0	0	0	0	0	0	0	0	0	0	0	0	0	0	0	0	0	0	0	0	0	0	0	0	0	0	0	0	0	0	0	0	0	0	0	0	0	0	0	0	0	0	0	0	0	0	0	0	0
K01260 aminopeptidase B [EC:3.4.11.6]	0	0	0	0	0	0	0	1	0	0	0	0	0	2	0	0	0	0	0	0	0	0	0	0	0	2	0	0	0	0	0	1	0	0	4	0	0	0	0	0	0	0	0	0	0	0	0	0	0
K17686 P-type Cu+ transporter [EC:7.2.2.8]	112	104	15	15	87	146	79	73	26	33	66	164	96	86	29	11	84	131	32	35	45	76	225	183	36	31	47	58	230	369	54	18	54	71	215	201	54	40	44	19	61	29	56	52	58	88	27	61	39
K12145 hydrogenase-4 component J [EC:1.-.-.-]	0	0	0	0	0	0	0	0	0	0	0	0	0	0	0	0	0	0	0	0	0	0	0	0	0	0	0	0	0	0	0	0	0	0	0	0	0	0	0	0	0	1	1	0	0	0	0	0	0
K02769 fructose PTS system EIIB component [EC:2.7.1.202]	6	3	6	0	3	3	2	0	2	4	9	8	6	2	0	0	10	4	2	0	3	11	16	17	0	2	4	8	13	13	4	0	4	13	7	41	0	3	2	3	3	0	2	3	2	1	1	8	2
K01269 aminopeptidase [EC:3.4.11.-]	24	19	10	16	21	9	17	14	10	11	21	28	17	12	12	0	1	15	8	3	24	17	44	44	7	8	12	12	29	58	11	4	13	29	42	38	6	9	12	4	11	5	11	13	7	7	5	10	11
K07107 acyl-CoA thioester hydrolase [EC:3.1.2.-]	13	21	5	8	14	8	12	14	12	10	7	16	16	16	18	4	5	8	7	12	10	7	8	32	22	15	2	15	15	51	22	8	6	18	31	11	13	14	7	6	8	9	7	5	6	5	7	5	3
K03412 two-component system, chemotaxis family, protein-glutamate methylesterase/glutaminase [EC:3.1.1.61 3.5.1.44]	47	39	16	11	22	247	24	20	26	15	94	39	21	22	15	18	11	33	47	15	18	33	32	43	42	24	17	17	140	37	94	14	25	27	31	23	108	28	18	9	17	14	7	9	14	13	40	40	16
K13002 glycosyltransferase [EC:2.4.1.-]	4	5	4	1	2	3	0	5	1	1	2	2	2	1	3	6	0	2	6	3	1	5	5	0	5	0	2	3	16	7	3	0	0	6	7	0	2	1	1	0	2	2	4	2	1	1	1	3	0
K02699 photosystem I subunit XI	1	1	0	0	0	0	1	0	0	0	0	0	1	2	0	0	0	0	4	2	2	0	0	0	1	2	1	0	0	0	4	1	0	0	0	0	26	1	1	0	1	3	1	1	0	0	3	6	0
K04034 anaerobic magnesium-protoporphyrin IX monomethyl ester cyclase [EC:1.21.98.3]	77	96	43	38	100	95	36	65	56	32	98	95	64	66	44	28	72	103	47	39	87	131	297	306	54	51	69	94	227	476	93	43	121	127	320	151	43	33	67	31	86	41	73	43	52	56	38	54	42
K21782 L-prolyl-PCP dehydrogenase [EC:1.3.8.14]	0	0	0	0	2	1	2	0	0	0	0	0	0	1	0	0	0	0	0	0	0	0	0	1	3	0	0	0	0	3	0	0	0	0	0	0	0	0	0	0	1	0	0	0	0	0	0	0	0
K03696 ATP-dependent Clp protease ATP-binding subunit ClpC	565	399	155	184	329	463	286	283	208	163	289	376	425	327	218	175	362	428	122	90	194	248	848	829	225	95	128	197	630	1211	163	79	198	327	720	753	339	279	419	164	248	168	252	179	221	271	213	253	234
K09778 Kdo2-lipid IVA 3' secondary acyltransferase [EC:2.3.1.-]	10	6	2	8	1	9	5	5	8	4	6	8	4	8	1	2	0	6	8	1	5	4	5	2	8	4	2	8	12	7	13	6	1	3	0	0	3	1	5	11	0	0	1	2	7	0	0	5	0
K04459 dual specificity MAP kinase phosphatase [EC:3.1.3.16 3.1.3.48]	0	0	1	1	0	0	0	0	0	0	0	0	0	0	1	0	0	0	0	0	0	0	0	0	0	0	0	0	0	0	0	0	0	1	0	0	0	0	1	0	0	0	0	0	0	0	0	0	0
K02973 small subunit ribosomal protein S23e	0	0	0	0	0	0	0	0	0	0	0	0	0	1	0	0	0	0	0	0	0	0	0	0	0	0	0	0	0	0	0	0	0	0	0	0	0	0	0	0	0	0	0	0	0	0	0	0	0
K03151 tRNA uracil 4-sulfurtransferase [EC:2.8.1.4]	8	8	3	1	0	1	1	0	5	0	4	8	3	3	0	5	0	3	0	4	5	5	13	11	8	8	7	14	15	28	2	6	1	6	22	3	1	4	2	1	6	5	8	3	4	4	0	1	3
K21580 reticuline N-methyltransferase [EC:2.1.1.337]	0	0	0	0	0	0	0	0	0	0	0	0	0	0	0	0	0	0	0	0	0	0	0	0	0	0	0	0	0	0	0	0	0	0	0	0	0	0	0	0	0	0	0	0	0	0	0	0	0
K23743 peptidyl-Asp metalloendopeptidase [EC:3.4.24.33]	3	1	0	1	0	7	5	4	0	0	0	1	0	1	1	0	0	4	0	1	0	0	0	6	2	0	0	1	1	0	0	5	0	0	2	0	3	0	1	0	0	0	0	0	0	0	1	1	0
K15942 O-methyltransferase / aklanonic acid methyltransferase [EC:2.1.1.- 2.1.1.288]	1	0	2	0	0	0	1	0	0	0	2	4	1	0	0	0	0	0	0	0	0	1	4	0	0	0	0	0	0	3	0	0	0	0	7	2	0	0	0	0	0	0	1	0	0	0	0	1	0
K10917 PadR family transcriptional regulator, regulatory protein AphA	3	3	0	0	1	4	3	4	1	0	4	6	3	0	0	6	0	5	1	3	3	3	8	12	4	0	2	3	4	27	1	1	0	5	2	0	1	0	0	1	2	0	2	0	0	1	0	0	1
K07909 Ras-related protein Rab-17	0	0	0	0	0	1	0	0	0	0	0	1	0	0	0	0	0	1	0	0	0	0	0	0	0	0	0	0	0	4	0	0	0	0	28	0	0	0	0	0	0	0	0	0	0	0	0	0	0
K00132 acetaldehyde dehydrogenase (acetylating) [EC:1.2.1.10]	15	9	0	5	2	15	11	12	16	2	6	2	3	3	0	5	10	10	5	0	2	2	2	8	5	1	3	11	17	6	6	0	0	7	3	0	4	4	7	0	2	0	2	7	2	0	3	3	4
K19817 coenzyme F420H2 oxidase [EC:1.5.3.22]	21	23	14	7	23	52	16	18	14	14	29	9	5	15	13	14	34	49	25	29	49	63	136	129	37	9	22	40	87	204	29	12	24	55	87	61	20	9	17	9	21	17	17	31	37	26	8	12	12
K05768 gelsolin	0	0	0	0	0	0	0	0	0	0	0	0	0	0	0	0	0	0	0	0	0	0	0	1	0	0	1	0	2	0	0	0	3	0	5	0	0	0	0	0	1	1	0	0	0	0	0	1	1
K04564 superoxide dismutase, Fe-Mn family [EC:1.15.1.1]	320	113	48	39	50	27	140	120	37	36	59	37	235	118	37	25	110	27	46	45	66	76	148	163	156	65	57	56	156	198	127	44	40	73	173	110	194	148	143	38	58	52	55	92	35	36	144	89	104
K01665 para-aminobenzoate synthetase component I [EC:2.6.1.85]	2	10	6	5	6	3	0	7	5	2	1	9	9	5	3	2	15	5	0	0	2	3	10	14	6	2	7	7	11	11	4	10	2	11	25	27	9	2	4	4	4	0	2	2	5	1	4	4	4
K18059 sulfate transporter 4	1	13	3	3	0	1	2	7	8	1	5	5	7	5	6	0	0	12	0	0	0	2	0	0	9	2	0	1	3	2	3	2	8	4	0	6	5	3	2	0	1	1	1	0	0	3	1	4	0
K16787 energy-coupling factor transport system ATP-binding protein [EC:7.-.-.-]	7	4	5	0	8	24	2	9	5	1	16	31	2	3	14	0	0	25	1	2	6	10	53	55	1	5	5	9	42	174	0	4	15	27	79	59	3	2	3	4	6	4	7	0	10	4	4	3	2
K16081 alginate production protein	0	0	0	0	0	0	0	1	0	0	0	0	0	0	0	0	0	0	1	0	0	0	0	0	0	0	0	0	0	0	0	0	0	0	0	0	0	0	0	0	0	0	0	0	0	0	0	0	0
K00054 hydroxymethylglutaryl-CoA reductase [EC:1.1.1.88]	28	22	12	4	28	41	12	8	4	6	44	48	28	12	18	11	52	40	3	30	24	48	102	99	9	6	15	30	71	132	6	3	11	34	131	94	5	4	16	1	10	13	14	8	8	20	2	8	6
K21304 UDP-N-acetylglucosamine---dolichyl-phosphate N-acetylglucosaminyltransferase [EC:2.4.1.153]	7	12	2	4	10	13	7	1	10	4	18	13	3	6	4	1	8	11	5	2	11	12	52	12	11	2	8	10	16	12	5	1	11	9	20	37	2	8	2	5	5	1	4	1	4	6	3	6	1
K16345 xanthine permease XanP	3	0	0	1	1	1	2	3	1	0	1	1	0	5	3	0	0	0	2	0	0	3	6	4	4	4	0	3	4	0	3	0	1	0	3	0	1	1	2	0	0	0	0	0	0	0	0	2	0
K02595 nitrogenase-stabilizing/protective protein	0	0	0	0	0	0	0	0	0	0	0	0	0	0	0	0	0	0	0	0	0	0	0	0	0	0	0	0	0	0	0	0	0	0	0	0	2	0	0	0	0	0	0	0	0	0	0	0	0
K15528 fatty acid amide hydrolase [EC:3.5.1.99]	0	0	1	0	0	0	0	0	0	0	0	0	0	0	0	1	0	0	0	1	0	0	0	0	0	0	0	0	0	0	0	0	0	0	0	0	0	0	0	0	2	0	0	1	0	0	0	0	0
K03392 aminocarboxymuconate-semialdehyde decarboxylase [EC:4.1.1.45]	43	14	10	9	13	10	12	17	9	9	5	15	24	18	5	10	29	14	3	2	11	12	43	27	3	2	6	15	20	83	5	0	5	13	61	17	1	3	2	1	4	3	1	2	2	2	1	4	1
K01060 cephalosporin-C deacetylase [EC:3.1.1.41]	4	3	0	2	9	15	4	3	9	2	3	11	7	12	2	0	6	6	4	0	5	8	10	14	3	3	5	5	14	4	2	1	5	3	3	25	3	3	5	1	6	2	2	3	2	2	4	9	2
K16201 dipeptide transport system permease protein	9	5	0	6	7	1	7	0	1	2	4	1	5	5	4	0	0	9	0	4	8	3	6	18	4	0	1	3	8	5	8	0	6	4	3	0	0	4	4	0	0	1	4	0	0	0	1	1	3
K00065 2-dehydro-3-deoxy-D-gluconate 5-dehydrogenase [EC:1.1.1.127]	58	52	21	24	55	59	41	42	29	26	59	26	44	42	44	24	36	55	31	19	47	74	195	186	27	31	36	56	115	290	41	26	31	66	121	158	27	13	17	7	28	20	16	27	21	17	13	22	21
K05524 ferredoxin	399	159	44	14	27	24	266	130	40	25	29	18	295	167	49	20	27	23	33	19	34	42	36	23	48	20	29	17	36	46	46	21	26	20	78	36	18	36	20	9	18	6	13	5	2	7	15	21	13
K02429 MFS transporter, FHS family, L-fucose permease	9	4	11	5	8	3	7	5	11	11	8	3	4	27	7	8	7	2	6	4	1	9	5	11	14	4	5	6	7	39	11	14	9	18	5	9	13	9	9	3	5	7	7	6	3	7	3	5	4
K17916 kinesin family member 16B	0	0	0	0	0	0	0	0	0	0	0	0	0	0	0	0	0	0	0	0	0	0	0	0	0	0	0	0	0	0	0	0	0	0	0	0	0	0	0	0	0	0	0	0	0	0	0	0	0
K17080 prohibitin 1	5	8	3	1	3	8	5	10	3	2	4	4	12	11	2	4	0	4	0	0	1	4	7	6	3	15	0	2	6	0	7	2	4	5	5	19	5	4	3	1	4	4	3	12	18	1	5	1	2
K12503 short-chain Z-isoprenyl diphosphate synthase [EC:2.5.1.68]	0	0	0	0	0	3	0	2	0	0	1	1	0	0	0	0	0	4	0	0	1	1	0	3	4	0	4	0	5	6	2	0	6	2	0	0	2	1	0	1	7	7	1	0	0	1	0	1	0
K09006 RNA-free ribonuclease P [EC:3.1.26.5]	0	0	3	0	0	0	0	0	0	0	0	0	0	0	2	0	0	0	0	0	0	0	0	0	0	0	0	0	0	0	0	0	0	0	0	0	0	0	0	0	14	2	1	0	1	0	0	0	1
K09921 uncharacterized protein	7	8	0	0	0	0	3	17	1	0	0	0	8	3	0	0	0	0	0	1	2	0	4	0	5	0	0	0	0	0	3	0	3	0	0	0	3	1	2	0	0	0	1	0	0	0	1	1	0
K08604 vibriolysin [EC:3.4.24.25]	14	9	13	3	24	46	8	7	8	59	28	12	22	5	3	0	1	12	2	6	24	6	0	0	16	3	4	7	7	22	7	6	9	6	19	0	6	2	0	1	0	0	2	0	1	0	7	1	2
K00068 sorbitol-6-phosphate 2-dehydrogenase [EC:1.1.1.140]	3	2	10	2	16	10	1	6	5	2	6	13	4	6	4	1	23	8	2	6	4	12	33	37	5	2	6	12	22	12	12	6	6	12	47	17	2	3	8	6	7	6	11	6	9	10	0	3	9
K16371 D-tagatose-1,6-bisphosphate aldolase subunit GatZ/KbaZ	4	4	1	0	0	3	4	0	0	3	0	2	0	2	5	0	0	6	0	0	4	3	7	15	2	3	3	4	5	16	0	0	0	0	8	0	0	1	1	0	0	1	2	2	2	3	0	2	0
K07012 CRISPR-associated endonuclease/helicase Cas3 [EC:3.1.-.- 3.6.4.-]	7	4	5	2	2	10	0	7	0	0	12	9	5	6	0	0	7	7	2	4	12	28	25	17	9	4	4	16	17	31	10	6	13	9	24	39	14	1	4	4	17	7	14	6	6	12	4	6	10
K14974 6-hydroxynicotinate 3-monooxygenase [EC:1.14.13.114]	0	1	0	0	0	0	0	0	0	0	0	0	0	0	0	0	0	0	0	0	0	0	0	0	0	0	0	0	0	0	0	0	0	0	0	0	0	0	0	0	0	0	0	0	0	0	0	0	0
K16022 flavoprotein hydroxylase	0	0	0	0	0	0	0	0	0	0	0	0	1	0	0	0	0	0	0	0	0	0	0	0	0	0	0	0	0	0	0	0	0	0	0	0	1	0	0	0	0	0	0	0	0	0	0	0	0
K21255 orsellinic acid C2-O-methyltransferase [EC:2.1.1.-]	0	0	2	0	0	0	1	0	1	0	0	5	0	0	0	0	0	0	0	0	2	0	0	0	0	0	0	4	2	0	0	0	2	3	0	0	0	0	0	0	0	0	0	0	0	0	0	0	0
K07469 aldehyde oxidoreductase [EC:1.2.99.7]	8	20	8	3	19	7	13	17	11	10	12	13	6	10	15	16	0	7	13	10	15	26	24	29	15	11	4	13	14	50	38	8	4	11	12	10	26	9	6	0	6	6	6	8	13	17	8	13	3
K04031 ethanolamine utilization protein EutS	0	0	0	0	0	0	0	0	0	0	0	0	0	0	0	0	0	0	0	0	0	0	0	0	0	0	0	0	0	0	0	0	0	0	0	0	1	0	1	0	0	0	0	0	0	0	0	1	0
K17490 methylmalonyl-CoA carboxyltransferase 1.3S subunit [EC:2.1.3.1]	3	3	0	3	0	6	2	1	0	3	2	2	0	3	1	0	0	0	3	3	0	2	9	0	4	2	0	1	3	4	5	0	3	1	0	0	30	2	2	1	1	0	2	4	0	1	5	3	0
K00232 acyl-CoA oxidase [EC:1.3.3.6]	2	0	0	0	0	0	1	1	0	0	0	0	0	0	0	0	0	0	0	0	0	0	3	0	0	0	0	0	0	0	0	0	0	0	0	0	0	2	0	0	0	0	0	0	0	0	0	0	0
K15373 sulfoacetaldehyde reductase [EC:1.1.1.313]	0	0	0	0	2	0	2	0	0	1	0	0	1	2	0	0	0	0	0	0	0	1	0	0	3	2	1	0	1	0	0	0	1	0	0	0	0	0	0	0	1	0	0	0	0	0	1	2	0
K04955 hyperpolarization activated cyclic nucleotide-gated potassium channel 2	0	0	0	0	0	0	0	0	0	0	0	0	0	0	0	0	0	0	0	0	0	0	0	0	0	0	0	0	0	0	0	0	0	0	0	0	0	0	0	0	0	0	0	0	0	0	0	0	0
K20574 kanamycin B dioxygenase [EC:1.14.11.37]	0	0	0	0	0	0	0	1	0	0	0	0	0	0	0	0	0	0	0	0	0	0	0	0	0	0	0	0	0	0	0	0	0	0	0	0	0	0	0	0	0	0	0	0	0	0	0	0	0
K12263 cytochrome c551	0	0	0	0	0	0	2	0	0	0	0	0	0	0	0	0	0	0	0	0	0	0	0	0	1	1	1	0	1	0	6	0	0	0	0	0	1	1	0	0	0	0	0	0	0	0	0	1	0
K05550 benzoate/toluate 1,2-dioxygenase subunit beta [EC:1.14.12.10 1.14.12.-]	1	0	0	0	0	0	1	0	0	0	0	0	0	0	0	0	0	0	0	0	0	0	0	0	0	0	0	0	0	0	0	0	0	0	0	0	0	0	0	0	0	0	0	0	0	0	0	0	0
K02619 4-amino-4-deoxychorismate lyase [EC:4.1.3.38]	1	7	0	1	2	0	1	2	1	0	8	0	0	3	2	4	0	1	0	0	0	1	12	5	1	0	2	0	12	21	4	4	0	1	3	4	3	2	1	1	1	0	0	1	2	1	0	1	0
K02081 DeoR family transcriptional regulator, aga operon transcriptional repressor	10	0	2	0	4	7	2	4	0	0	0	10	12	2	4	0	0	2	6	1	2	1	9	11	3	1	2	2	5	17	7	1	1	1	17	13	0	5	7	0	0	3	2	4	5	4	2	0	1
K11474 GntR family transcriptional regulator, glc operon transcriptional activator	1	0	0	1	0	0	2	2	0	0	0	1	1	3	0	0	0	0	0	0	1	6	3	3	1	0	1	2	0	10	0	1	0	0	0	3	0	0	1	1	0	0	0	2	1	0	0	0	2
K02635 cytochrome b6	34	29	9	16	11	17	24	26	7	6	27	11	18	42	19	11	0	9	12	3	7	9	3	1	11	6	10	4	11	16	20	5	4	4	0	14	44	6	13	5	8	4	11	3	1	0	6	12	7
K05594 ElaB protein	0	0	0	0	0	0	0	0	0	0	0	0	0	0	0	0	0	0	0	0	0	0	0	0	0	0	0	0	0	0	0	0	0	0	0	0	3	1	1	1	0	0	0	0	0	0	2	2	2
K02229 precorrin-3B synthase [EC:1.14.13.83]	0	0	0	0	0	0	0	0	0	0	0	0	0	0	0	0	0	0	0	0	0	0	0	0	0	0	0	0	0	0	0	0	0	0	0	0	0	0	0	1	0	0	0	0	0	0	0	0	0
K07281 1L-myo-inositol 1-phosphate cytidylyltransferase [EC:2.7.7.74]	1	8	0	1	5	1	1	2	4	1	1	12	3	3	0	0	0	1	0	0	0	4	5	3	3	1	1	4	3	27	5	3	0	9	4	0	0	0	3	0	0	0	0	0	0	2	1	2	0
K19585 multidrug efflux pump	0	0	0	0	0	0	0	0	0	0	0	0	0	0	0	0	0	0	0	0	0	0	0	0	0	0	0	0	0	0	0	0	0	0	0	0	0	0	0	0	0	0	0	0	0	0	0	0	0
K18991 AraC family transcriptional regulator, activator of mtrCDE	2	2	0	0	0	0	0	0	0	1	0	0	1	1	2	0	0	0	2	0	1	0	0	0	3	0	0	0	0	0	2	0	0	0	0	0	1	0	0	0	0	0	0	0	0	0	0	0	0
K04788 mycobactin phenyloxazoline synthetase	0	0	0	0	0	0	1	0	0	0	0	0	0	0	0	0	0	1	0	0	0	0	0	0	0	0	0	0	1	6	0	0	0	0	0	0	0	0	0	0	0	0	0	0	0	0	0	0	0
K23258 8-oxo-(d)GTP phosphatase [EC:3.6.1.69]	0	0	0	0	0	0	0	0	0	0	0	0	0	0	0	0	0	0	0	0	0	0	0	0	0	0	0	0	0	0	0	0	0	0	0	0	0	0	0	0	0	0	0	0	0	0	0	0	0
K14680 RNA ligase [EC:6.5.1.3]	0	0	1	0	0	0	0	0	0	0	0	0	0	0	0	0	0	0	2	0	0	0	0	1	0	0	0	0	0	0	0	0	0	0	0	0	0	0	0	0	1	0	0	0	0	0	0	0	0
K00674 2,3,4,5-tetrahydropyridine-2,6-dicarboxylate N-succinyltransferase [EC:2.3.1.117]	11	8	2	2	1	0	10	5	1	0	2	0	11	7	5	0	0	0	7	9	10	5	0	3	12	4	3	1	11	14	38	3	2	4	1	0	11	5	7	1	4	4	0	1	2	3	7	1	6
K02876 large subunit ribosomal protein L15	151	87	57	37	52	60	66	84	34	56	43	47	118	77	65	20	40	99	50	20	55	71	107	79	119	34	46	39	155	226	160	22	22	51	128	69	167	51	46	17	49	47	32	36	35	39	78	56	36
K00968 choline-phosphate cytidylyltransferase [EC:2.7.7.15]	0	1	0	0	0	0	0	1	0	0	0	0	0	1	0	0	0	0	2	0	0	1	0	0	1	0	0	0	1	0	0	0	0	0	0	0	2	1	0	0	0	1	0	2	0	0	0	0	1
K00554 tRNA (guanine37-N1)-methyltransferase [EC:2.1.1.228]	113	102	29	39	85	77	82	58	52	63	120	76	86	77	30	25	150	97	39	30	54	72	187	168	92	51	52	41	153	222	102	40	56	87	109	152	83	44	42	33	57	40	46	34	42	57	43	49	37
K00891 shikimate kinase [EC:2.7.1.71]	15	15	3	6	8	7	6	10	5	3	11	5	9	15	13	1	46	7	5	4	14	7	44	20	12	10	8	5	8	34	10	9	24	6	31	0	7	4	2	4	13	7	6	9	3	2	11	6	11
K11389 glyceraldehyde-3-phosphate dehydrogenase (ferredoxin) [EC:1.2.7.6]	1	5	2	0	3	11	0	3	1	0	1	10	2	6	0	0	5	3	16	4	2	6	8	19	2	0	5	9	6	22	13	0	2	3	4	7	5	0	5	2	7	4	1	3	2	3	2	3	1
K19639 perakine reductase [EC:1.1.1.317]	2	8	1	0	1	1	1	6	1	0	10	3	5	0	2	0	0	1	3	3	3	6	5	8	1	3	1	5	7	27	4	0	3	4	19	8	1	1	2	2	4	2	2	3	1	1	2	3	3
K06991 uncharacterized protein	7	2	0	0	0	0	1	2	0	0	1	0	1	0	0	0	0	0	0	0	0	0	0	0	2	0	1	0	0	0	4	0	3	0	0	0	0	0	1	0	0	0	0	0	0	0	1	0	0
K11949 4-(2-carboxyphenyl)-2-oxobut-3-enoate aldolase [EC:4.1.2.34]	0	0	0	0	0	0	0	0	0	0	0	0	2	1	0	0	0	0	0	0	0	0	0	0	0	0	0	0	0	0	0	0	0	0	0	0	1	0	0	0	0	0	0	0	0	0	0	0	0
K25578 4-amino-4-deoxychorismate synthase (2-amino-4-deoxychorismate-forming) component I [EC:2.6.1.123]	0	0	0	0	0	0	0	0	0	0	0	0	0	0	0	0	0	0	0	0	0	0	0	0	0	0	0	0	0	0	0	0	0	0	0	0	0	0	0	0	0	0	0	0	0	0	0	0	0
K20678 dTDP-fucopyranose mutase [EC:5.4.99.59]	0	0	0	0	0	0	0	2	0	0	0	0	0	0	1	0	0	0	0	0	0	0	0	0	0	0	0	0	1	0	0	0	0	0	0	0	0	0	0	0	0	0	0	0	0	0	0	0	0
K19110 putative 2-oxoglutarate oxygenase	6	1	0	0	0	0	2	1	0	0	0	0	3	5	1	0	0	0	2	0	0	0	0	0	0	0	0	0	0	0	0	0	0	0	0	0	0	0	0	0	1	0	0	0	0	0	0	0	0
K22227 AdoMet-dependent heme synthase [EC:1.3.98.6]	73	104	37	41	90	148	47	100	64	36	105	121	47	123	54	39	58	164	18	44	70	97	282	264	38	44	64	101	184	475	49	20	90	118	258	181	27	14	35	23	40	38	43	20	26	33	9	18	22
K07025 putative hydrolase of the HAD superfamily	33	28	21	19	22	45	17	32	8	19	25	32	29	22	16	27	31	20	9	4	23	22	83	74	20	9	22	19	54	138	16	6	21	20	76	47	13	7	9	10	13	8	11	11	6	17	7	11	6
K18549 oryzin [EC:3.4.21.63]	1	3	0	0	0	0	0	0	0	0	0	0	5	1	0	0	0	4	0	1	0	2	0	0	0	0	0	1	0	0	0	0	0	0	0	0	0	0	0	0	1	1	0	0	0	0	0	0	0
K18351 two-component system, OmpR family, sensor histidine kinase VanS [EC:2.7.13.3]	0	0	0	0	0	0	0	0	0	0	0	0	0	0	0	0	0	0	0	0	0	0	0	0	0	0	0	0	0	0	0	0	0	1	0	0	0	0	0	0	0	0	0	1	0	0	0	0	1
K17236 arabinooligosaccharide transport system permease protein	0	0	4	0	2	0	0	0	0	0	0	0	2	0	0	0	0	3	3	0	0	3	0	0	2	0	0	1	0	13	2	2	0	0	0	0	1	0	0	1	2	0	1	1	2	1	3	3	0
K07119 prostaglandin reductase 3 [EC:1.3.1.48]	39	28	4	4	3	4	23	22	4	4	6	4	30	16	6	3	19	0	4	5	5	7	9	12	19	6	2	2	7	0	8	6	10	1	12	2	3	3	4	3	1	2	2	2	0	1	1	7	6
K03819 putative colanic acid biosynthesis acetyltransferase WcaB [EC:2.3.1.-]	1	3	0	0	0	2	0	3	0	0	0	3	0	0	0	0	0	0	0	0	0	0	0	0	0	0	0	0	3	0	0	0	0	0	0	0	0	0	0	0	0	0	0	0	0	0	0	0	0
K10006 glutamate transport system permease protein	0	0	0	0	0	0	0	0	0	0	0	0	1	0	0	0	0	0	0	0	0	0	0	0	0	0	0	0	0	0	0	0	0	0	0	0	0	0	0	1	0	0	0	0	0	0	0	0	0
K07791 anaerobic C4-dicarboxylate transporter DcuA	1	4	0	0	0	1	0	2	0	0	0	0	1	0	1	6	0	1	3	1	0	1	1	0	0	1	0	2	0	0	2	0	1	0	0	0	0	0	0	0	0	0	0	0	0	0	0	1	0
K18058 L-asparagine oxygenase [EC:1.14.11.39]	0	0	0	0	0	0	0	0	0	0	0	0	0	0	0	0	0	0	0	0	0	0	0	0	0	0	0	0	0	0	0	0	0	0	0	0	1	0	1	0	0	0	0	0	0	0	0	0	0
K09806 ubiquinone biosynthesis accessory factor UbiK	2	0	0	0	0	0	0	0	0	0	0	0	3	3	0	0	0	0	0	2	0	0	0	0	1	0	0	0	0	0	1	0	1	0	0	0	3	5	2	0	0	0	1	0	0	0	2	3	2
K22168 F420H2 dehydrogenase subunit M [EC:1.5.98.3]	0	1	0	3	13	19	1	0	2	2	13	9	3	3	0	3	0	16	0	1	4	14	68	62	1	3	15	9	29	59	2	0	6	21	95	42	0	0	5	12	148	26	12	2	9	2	2	5	9
K09132 uncharacterized protein	2	1	8	0	8	11	1	1	3	3	7	11	1	6	3	1	14	15	1	6	4	6	7	26	3	3	1	8	25	71	4	1	5	3	11	9	8	1	2	0	4	4	3	1	2	1	3	4	3
K05379 phycoerythrin-associated linker protein	2	2	1	0	0	0	4	2	0	0	0	0	0	10	0	0	0	0	1	0	0	1	0	0	2	2	3	0	0	0	8	0	0	0	0	0	4	0	1	0	0	1	2	2	1	0	1	0	0
K25067 fucose transport system substrate-binding protein	0	0	0	0	0	0	0	0	0	1	0	0	0	0	0	0	0	0	0	0	0	0	0	0	0	0	0	0	0	0	0	0	0	0	0	0	0	1	0	0	1	0	0	0	0	0	0	1	0
K21743 MerR family transcriptional regulator, multidrug-efflux activator	10	2	0	0	0	0	0	0	0	0	3	0	0	0	0	0	0	0	0	0	0	0	0	0	4	0	0	3	2	0	0	0	2	0	0	0	0	0	0	0	0	0	0	0	0	0	0	0	1
K18030 nicotinate dehydrogenase subunit B [EC:1.17.2.1]	1	0	2	2	2	0	1	0	1	0	0	0	2	1	2	1	0	0	0	0	0	1	0	0	0	0	0	5	0	7	2	1	0	3	0	0	0	0	0	0	0	0	0	0	0	0	0	2	0
K10353 deoxyadenosine kinase [EC:2.7.1.76]	1	7	2	0	0	0	0	1	5	0	2	0	0	1	3	1	0	1	3	0	1	1	2	12	5	2	2	2	7	13	2	0	0	1	4	24	0	0	3	0	1	1	0	1	0	2	0	1	0
K18605 biotin carboxyl carrier protein	0	0	0	0	0	0	0	0	0	0	0	4	2	1	0	0	0	0	0	0	0	0	0	0	0	0	0	0	0	0	0	0	0	0	0	0	0	0	0	0	0	0	0	0	0	0	0	0	0
K09702 uncharacterized protein	8	2	0	4	2	1	0	3	1	0	2	0	2	0	1	0	0	2	0	1	1	8	0	1	2	0	1	1	5	2	3	1	3	6	0	0	6	2	0	0	1	0	3	2	1	0	0	1	1
K01953 asparagine synthase (glutamine-hydrolysing) [EC:6.3.5.4]	187	184	68	61	88	113	96	111	85	61	88	95	144	149	80	42	159	91	69	45	85	94	216	195	131	56	75	88	218	257	128	50	68	106	236	149	94	37	59	22	53	24	49	29	25	34	41	41	50
K00254 dihydroorotate dehydrogenase [EC:1.3.5.2]	8	0	3	0	0	0	5	6	1	1	0	0	5	5	0	0	0	0	6	0	1	3	0	0	7	4	1	1	10	0	10	3	1	2	2	0	24	7	1	4	3	1	3	2	1	1	12	4	3
K20325 TetR/AcrR family transcriptional regulator, Clp-modulated transcription factor	0	0	0	0	0	0	0	0	0	0	0	0	0	0	0	0	0	0	0	0	0	0	0	0	0	0	0	0	0	0	0	0	0	0	0	0	0	0	0	0	0	0	0	0	0	0	0	0	0
K10830 manganese/zinc transport system ATP-binding protein [EC:7.2.2.5]	0	0	0	0	0	0	0	0	0	0	0	0	0	0	0	0	0	0	0	0	0	0	0	0	0	0	0	0	0	0	0	0	0	0	0	0	0	0	0	0	0	0	0	0	0	0	0	0	0
K16053 miniconductance mechanosensitive channel	11	9	5	4	11	5	7	8	3	1	14	5	3	4	6	6	17	1	0	5	2	1	13	8	2	8	5	8	5	8	5	0	6	2	5	17	1	0	3	0	0	2	0	3	2	1	2	2	1
K01134 arylsulfatase A [EC:3.1.6.8]	116	89	77	59	46	76	67	102	68	49	72	53	75	96	87	62	59	60	19	26	50	65	208	138	52	15	41	33	118	193	45	21	39	55	95	89	11	15	21	14	28	33	29	20	36	46	8	23	30
K11390 citrate lyase subunit beta-like protein [EC:4.1.-.-]	2	2	2	0	2	0	0	0	0	0	1	1	1	4	0	0	0	0	0	0	0	0	2	0	0	0	1	1	3	6	0	0	0	0	6	0	0	0	1	1	0	0	0	0	0	0	0	0	0
K05979 2-phosphosulfolactate phosphatase [EC:3.1.3.71]	6	4	3	4	7	1	4	4	7	0	1	3	3	3	2	0	6	0	3	2	6	6	8	28	1	1	0	2	17	17	4	0	3	7	6	18	2	2	2	2	4	1	3	12	14	1	2	1	4
K16327 putative LysE/RhtB family amino acid efflux pump	3	1	0	0	0	0	0	0	0	0	3	0	0	0	0	0	0	0	0	0	1	6	0	0	0	0	1	2	3	5	0	0	0	2	0	0	0	2	0	0	1	1	0	2	0	0	0	0	1
K21022 diguanylate cyclase [EC:2.7.7.65]	0	0	1	0	1	0	1	0	0	0	0	0	0	1	1	0	0	0	2	0	0	0	0	0	0	0	0	0	4	0	4	0	0	0	13	0	2	1	0	0	0	0	1	0	0	1	0	0	0
K16138 TetR/AcrR family transcriptional regulator, repressor for uid operon	0	0	0	0	0	0	0	0	0	0	0	0	0	0	0	0	0	0	0	0	0	0	0	0	0	0	0	0	0	0	0	0	0	0	0	0	0	0	0	1	0	0	0	0	0	0	0	0	0
K14273 D-xylose 1-dehydrogenase (NADP+, D-xylono-1,5-lactone-forming) [EC:1.1.1.179]	2	1	3	1	3	0	2	2	3	3	1	3	7	0	3	6	0	0	1	2	4	8	8	5	0	1	3	1	1	3	2	1	3	2	1	0	3	0	4	4	1	2	1	3	2	0	1	0	3
K11784 cyclic dehypoxanthinyl futalosine synthase [EC:1.21.98.1]	12	18	2	6	2	7	3	5	4	8	2	1	19	13	16	1	11	10	5	8	4	1	7	4	15	5	0	2	11	0	8	0	0	3	37	20	11	5	8	2	3	4	1	0	2	3	5	6	2
K02715 PsbN protein	0	0	0	0	0	0	0	0	0	0	0	0	0	0	0	0	0	0	0	0	0	0	0	0	0	0	0	0	0	0	0	0	0	0	0	0	3	0	0	0	0	0	0	0	0	0	0	0	0
K19888 4'-demethylrebeccamycin synthase [EC:4.3.3.5]	0	0	1	0	0	0	0	1	0	0	0	0	0	0	3	0	0	0	0	0	0	0	0	0	0	0	0	0	4	0	0	0	0	0	0	0	0	0	0	0	0	0	0	0	0	0	1	0	0
K03583 exodeoxyribonuclease V gamma subunit [EC:3.1.11.5]	0	5	1	0	4	2	4	2	3	4	3	1	3	4	0	0	13	6	1	6	2	0	11	6	10	3	1	1	21	24	7	1	0	3	12	12	11	2	5	1	4	1	3	0	5	3	6	5	0
K15498 serine/threonine-protein phosphatase 6 catalytic subunit [EC:3.1.3.16]	0	0	0	0	0	0	0	0	0	0	0	0	0	0	0	0	0	0	0	0	0	0	0	0	0	0	0	0	0	0	0	0	0	0	0	0	0	0	0	0	0	0	0	0	0	0	0	0	0
K16784 biotin transport system ATP-binding protein [EC:7.6.2.-]	1	1	0	0	0	10	8	3	0	1	1	3	0	0	0	0	0	2	2	0	2	1	3	7	4	0	0	1	0	0	1	0	0	0	0	0	0	0	3	1	0	3	0	0	0	0	1	3	0
K10618 p-cumic aldehyde dehydrogenase	2	3	0	0	0	0	1	0	0	0	0	0	1	2	0	0	0	1	0	0	0	4	1	0	0	0	0	0	1	12	0	0	3	0	0	0	0	0	2	0	0	1	0	0	0	0	0	1	0
K03113 translation initiation factor 1	7	9	4	3	8	20	4	8	5	2	34	18	10	3	3	1	19	13	8	6	19	24	42	55	13	7	25	11	32	53	17	8	6	39	79	64	2	6	14	7	50	15	17	11	7	22	7	8	11
K13292 phosphatidylglycerol---prolipoprotein diacylglyceryl transferase [EC:2.5.1.145]	39	15	10	8	28	35	26	23	8	11	14	28	22	15	17	5	17	45	23	10	24	31	60	72	42	10	25	28	38	130	35	14	17	17	96	66	19	18	21	21	25	24	28	19	15	17	13	19	20
K09775 uncharacterized protein	1	2	0	0	0	0	0	0	0	0	5	0	3	0	0	0	7	3	0	3	2	0	8	9	0	1	6	0	1	8	0	0	0	1	0	13	2	2	0	0	5	3	5	0	4	1	5	4	1
K01889 phenylalanyl-tRNA synthetase alpha chain [EC:6.1.1.20]	84	61	21	39	68	106	30	34	31	26	67	53	55	62	24	30	48	83	56	36	72	74	187	176	48	40	50	63	227	284	87	21	50	112	202	152	49	29	29	24	44	30	30	34	31	35	30	35	24
K17675 ATP-dependent RNA helicase SUPV3L1/SUV3 [EC:3.6.4.13]	5	2	0	0	0	0	0	0	0	0	0	0	4	1	0	0	0	1	3	0	0	3	0	0	3	1	1	0	1	0	0	0	0	0	0	0	4	4	3	0	0	0	0	0	1	0	1	0	1
K03829 putative acetyltransferase [EC:2.3.1.-]	3	2	0	2	2	1	1	1	1	0	0	0	2	1	0	0	0	3	0	1	2	0	0	0	0	0	0	0	2	0	0	2	0	0	0	0	1	1	0	0	2	0	1	0	0	0	0	0	1
K14188 D-alanine--poly(phosphoribitol) ligase subunit 2 [EC:6.1.1.13]	0	0	0	0	0	0	1	0	2	0	0	1	2	0	1	0	0	2	0	0	0	0	0	0	5	0	0	0	0	0	1	0	0	0	0	0	0	0	0	1	0	0	0	1	0	0	1	1	0
K07034 uncharacterized protein	3	3	6	4	3	2	0	3	6	7	7	7	2	5	12	0	12	4	15	5	6	3	7	3	11	4	0	4	21	35	12	5	6	13	25	56	11	6	8	0	1	23	41	24	31	23	11	6	3
K17618 ubiquitin-like domain-containing CTD phosphatase 1 [EC:3.1.3.16]	0	0	0	0	0	0	0	0	0	0	0	0	0	0	0	0	0	0	0	0	0	0	0	0	0	0	0	0	0	0	0	0	0	0	0	0	0	0	0	0	0	0	0	0	0	0	0	0	0
K12702 novobiocin biosynthesis protein NovI	0	0	0	0	0	0	0	0	0	0	0	0	3	0	0	0	0	0	3	0	0	0	0	0	1	0	0	0	0	0	0	0	0	0	0	0	0	0	0	0	0	0	0	0	0	0	0	0	0
K19235 L,D-transpeptidase YbiS	0	0	0	0	0	0	3	0	2	0	0	0	0	1	0	0	0	0	0	0	0	0	0	0	0	0	0	0	0	0	0	0	1	1	0	0	0	1	0	0	0	0	0	1	2	0	0	0	0
K15066 vanillate/3-O-methylgallate O-demethylase [EC:2.1.1.341]	2	2	0	1	0	0	0	1	0	0	0	0	0	0	1	0	0	0	0	0	0	0	0	0	0	0	0	0	1	0	0	0	0	0	4	0	0	0	0	0	0	0	0	0	0	0	0	1	0
K16090 catecholate siderophore receptor	2	1	1	2	7	4	6	5	3	2	0	0	4	1	1	4	16	1	3	2	5	0	0	0	0	2	3	1	0	0	1	1	0	1	2	0	0	0	1	0	0	1	1	0	0	0	1	2	0
K24259 putative aminotransferase	0	0	0	0	0	0	0	0	0	0	0	0	0	0	0	0	0	0	0	0	0	0	0	0	0	0	0	0	0	0	0	0	0	0	0	0	0	0	0	0	0	0	0	0	0	0	0	0	0
K22312 hydroxyjasmonate sulfotransferase [EC:2.8.2.39]	0	0	0	0	0	0	0	0	0	0	0	0	0	0	0	0	0	0	1	0	0	0	0	0	0	0	0	0	0	0	0	0	0	0	0	0	0	0	0	0	0	0	0	0	0	0	0	0	0
K00171 pyruvate ferredoxin oxidoreductase delta subunit [EC:1.2.7.1]	17	18	15	11	27	23	15	16	11	21	41	24	18	13	29	12	68	35	17	4	17	35	86	143	28	13	23	26	93	257	54	18	8	31	61	59	14	5	16	7	16	18	20	20	17	11	2	12	5
K21297 flavin reductase (NADH) [EC:1.5.1.36]	0	1	0	0	2	3	0	1	0	0	1	3	0	1	0	0	20	8	2	0	0	0	5	11	0	1	0	2	3	0	0	0	0	2	4	3	1	0	0	0	1	0	2	2	3	5	0	0	1
K00577 tetrahydromethanopterin S-methyltransferase subunit A [EC:2.1.1.86]	4	12	5	6	3	1	2	1	0	1	0	5	4	10	1	3	8	1	0	0	0	1	0	21	1	0	3	0	3	5	2	0	2	5	16	0	4	3	2	6	123	54	67	18	37	25	0	1	6
K03322 manganese transport protein	5	0	11	4	1	10	0	2	2	3	1	0	3	2	2	4	8	4	4	1	5	0	15	23	4	0	1	3	0	10	8	1	1	2	2	7	1	1	3	1	4	0	7	3	1	1	0	6	5
K09459 phosphonopyruvate decarboxylase [EC:4.1.1.82]	4	5	4	1	3	0	3	2	0	2	4	18	4	5	9	0	14	6	4	2	6	0	23	8	1	0	3	9	8	15	9	0	11	17	12	19	1	1	3	1	3	0	2	6	1	3	0	3	1
K09774 lipopolysaccharide export system protein LptA	1	4	1	2	9	0	1	5	2	5	8	4	6	1	0	0	10	0	2	0	4	3	15	5	1	0	1	1	11	12	6	1	1	1	2	0	3	3	5	1	3	0	2	3	4	1	1	3	9
K15744 zeta-carotene isomerase [EC:5.2.1.12]	0	3	0	0	0	0	0	0	0	0	0	0	0	0	0	0	0	0	1	0	1	0	0	0	1	0	0	1	2	0	0	0	0	3	0	0	1	2	1	0	0	0	0	0	0	0	1	0	0
K06075 MarR family transcriptional regulator, transcriptional regulator for hemolysin	5	1	2	3	2	8	6	3	2	4	1	0	13	5	5	0	0	8	2	4	0	2	6	2	6	3	4	1	8	16	0	4	0	0	3	1	2	5	5	0	3	0	0	2	0	0	3	2	3
K00784 ribonuclease Z [EC:3.1.26.11]	519	443	269	168	188	249	321	364	273	196	239	175	519	482	222	117	157	210	91	71	129	165	429	235	169	126	158	175	854	683	96	84	118	127	295	253	43	32	40	21	38	32	38	37	26	18	27	38	30
K00720 ceramide glucosyltransferase [EC:2.4.1.80]	0	3	0	1	0	2	1	0	0	0	2	0	0	0	0	0	0	0	0	2	1	0	3	3	1	1	0	0	1	2	0	0	0	0	5	1	0	0	0	0	0	0	1	0	0	0	0	0	0
K17999 iron-hydrogenase subunit gamma [EC:1.12.1.4]	3	15	4	3	15	22	1	6	14	10	13	13	3	4	4	1	14	31	6	3	4	7	40	48	16	9	5	4	26	71	12	11	8	11	25	64	4	3	1	3	6	6	8	2	7	7	4	6	4
K22686 pro-apoptotic serine protease NMA111 [EC:3.4.21.-]	2	0	0	0	0	0	0	0	0	0	0	0	0	0	0	0	0	0	0	0	0	0	0	0	0	0	0	0	0	0	0	0	0	0	0	0	0	0	0	0	0	0	0	0	0	0	0	0	0
K00657 diamine N-acetyltransferase [EC:2.3.1.57]	12	5	4	2	12	13	1	1	1	7	3	7	7	6	14	3	6	8	1	5	13	6	38	25	6	6	1	5	26	32	9	3	10	14	21	22	3	3	2	0	5	3	3	5	10	9	2	5	3
K07224 iron uptake system component EfeO	0	0	0	0	0	0	0	0	0	0	0	0	0	0	0	0	0	0	0	0	0	0	0	0	0	0	0	0	0	0	0	0	0	0	0	0	0	0	0	0	0	0	0	0	0	0	0	0	0
K03186 flavin prenyltransferase [EC:2.5.1.129]	25	22	8	8	9	4	7	16	4	7	5	26	15	15	7	1	70	8	3	5	6	9	25	13	10	10	7	13	24	10	3	6	5	16	21	23	9	2	4	5	9	7	10	5	1	3	4	6	1
K15640 uncharacterized phosphatase	2	0	4	0	1	0	1	0	0	0	0	8	2	1	2	5	0	2	5	0	0	1	14	0	2	1	1	0	2	2	1	2	0	0	1	21	0	3	3	1	0	0	0	1	0	3	2	3	0
K01692 enoyl-CoA hydratase [EC:4.2.1.17]	66	63	40	28	54	58	48	64	40	30	59	78	60	58	25	33	3	62	37	22	46	84	158	169	53	23	67	52	144	260	35	28	24	73	209	150	41	16	31	20	28	20	26	18	34	16	17	31	10
K23078 menaquinone C8-methyltransferase [EC:2.1.1.350]	0	0	0	0	0	0	2	0	0	0	0	0	0	0	0	0	0	0	0	0	0	0	0	0	0	0	0	0	0	0	0	0	0	0	0	0	0	0	1	0	1	0	0	0	1	0	0	0	0
K02601 transcription termination/antitermination protein NusG	200	162	88	51	115	140	95	118	97	86	176	76	133	163	92	60	180	163	92	58	98	103	239	300	167	56	93	78	285	538	205	63	77	77	323	208	219	107	111	22	90	52	90	67	64	82	114	78	71
K21813 endonuclease V [EC:3.1.26.-]	0	0	0	0	0	0	0	0	0	0	0	0	0	0	0	0	0	0	0	0	0	0	0	0	0	0	0	0	0	0	0	0	0	0	0	0	0	0	0	0	0	0	0	0	0	0	1	0	0
K00326 cytochrome-b5 reductase [EC:1.6.2.2]	3	0	0	0	0	0	1	0	0	0	0	0	0	1	0	0	0	0	0	0	0	0	0	1	0	0	0	0	0	0	0	0	0	0	0	0	0	0	0	0	0	0	0	0	0	0	0	1	1
K22187 alpha-ketoglutaric semialdehyde dehydrogenase [EC:1.2.1.-]	29	12	6	4	12	11	17	18	6	6	7	9	17	25	4	21	0	14	6	4	21	8	43	36	16	8	11	8	14	50	10	3	5	14	62	64	7	5	2	10	58	22	15	7	14	8	7	11	5
K02511 MFS transporter, ACS family, 4-hydroxyphenylacetate permease	0	0	0	0	0	0	0	0	0	0	0	0	0	0	0	0	0	0	0	0	0	0	0	0	0	0	0	0	0	0	0	0	0	0	0	0	0	0	0	0	0	0	0	0	0	0	0	0	0
K17850 LysR family transcriptional regulator, regulator of gene expression of beta-lactamase	2	0	0	0	0	0	0	0	0	0	0	0	1	1	0	0	0	0	0	0	0	0	0	0	0	0	0	0	0	0	0	0	0	0	0	0	1	1	0	1	0	0	0	0	0	0	0	0	1
K17717 phospholipase D [EC:3.1.4.4]	0	0	0	0	0	0	0	0	0	0	1	0	0	0	0	0	7	0	0	0	0	0	0	0	0	0	0	0	0	0	0	0	0	0	0	0	0	0	0	0	0	0	0	0	0	0	0	0	0
K21223 O-methyltransferase [EC:2.1.1.-]	0	0	0	0	0	0	0	0	0	0	0	0	0	0	0	0	0	0	0	0	0	0	0	0	0	0	0	0	0	0	0	2	0	0	0	0	0	0	0	0	0	0	0	0	0	0	0	0	0
K00721 dolichol-phosphate mannosyltransferase [EC:2.4.1.83]	92	109	53	70	94	73	71	54	87	62	90	89	77	99	40	55	105	106	70	53	96	84	249	186	70	42	79	82	158	261	71	44	59	87	180	246	76	37	51	41	103	42	51	41	43	35	41	49	39
K12951 cobalt/nickel-transporting P-type ATPase D [EC:7.2.2.-]	0	0	0	0	0	0	0	0	0	0	0	0	0	0	0	0	0	0	0	0	0	0	0	0	0	0	0	0	0	0	0	0	0	0	0	0	0	0	0	0	0	0	0	0	0	0	0	0	0
K08946 chlorosome envelope protein B	0	0	0	0	0	0	0	0	0	0	0	0	0	0	0	0	0	0	1	0	0	0	2	0	7	0	0	0	0	0	3	0	0	0	0	0	0	0	0	0	0	0	0	0	0	0	0	0	0
K07024 sucrose-6-phosphatase [EC:3.1.3.24]	2	1	0	1	0	1	1	0	0	0	0	0	4	4	1	0	0	2	0	0	0	1	0	0	5	0	0	2	0	1	2	2	0	0	0	0	2	4	0	0	1	0	0	0	0	1	0	1	1
K02116 ATP synthase protein I	17	16	7	10	0	3	9	10	9	4	0	7	13	17	4	18	7	8	20	4	16	7	31	19	39	9	7	10	28	42	38	10	19	5	24	29	50	21	15	7	17	12	7	13	12	7	21	10	13
K22350 manganese oxidase [EC:1.16.3.3]	56	20	0	0	0	0	21	17	4	4	0	0	29	16	4	0	0	0	3	1	0	0	0	0	1	0	0	2	0	0	1	1	0	0	0	0	0	2	0	0	0	0	1	2	0	0	2	0	0
K16137 TetR/AcrR family transcriptional regulator, transcriptional repressor for nem operon	43	11	19	2	4	3	10	17	14	11	7	9	29	19	10	0	7	12	6	10	5	10	12	2	18	3	12	8	7	1	13	0	8	6	17	27	7	10	12	6	3	5	8	5	3	0	10	16	19
K08640 zinc D-Ala-D-Ala carboxypeptidase [EC:3.4.17.14]	2	0	0	0	0	0	0	1	1	0	0	0	2	0	0	0	0	0	0	0	0	2	0	0	0	0	1	0	0	3	5	0	0	0	0	0	10	0	0	2	0	0	1	0	0	0	2	0	0
K08298 L-carnitine CoA-transferase [EC:2.8.3.21]	0	0	0	0	0	2	0	0	0	3	0	0	0	0	0	0	0	0	0	0	0	0	0	0	0	0	0	0	0	0	0	0	0	0	0	0	0	0	0	0	0	0	0	0	0	0	0	0	0
K04090 indolepyruvate ferredoxin oxidoreductase [EC:1.2.7.8]	18	17	7	1	1	0	8	8	2	3	0	0	18	11	0	0	0	7	1	1	4	0	8	3	5	2	0	2	3	5	0	0	3	1	1	0	1	4	4	0	0	0	0	2	0	4	2	6	4
K08970 nickel/cobalt transporter (NicO) family protein	0	0	1	0	1	0	2	0	0	0	1	0	0	0	0	0	0	2	0	0	3	3	7	0	3	0	2	0	3	1	1	0	0	2	11	0	0	0	2	1	1	1	0	0	0	0	0	0	0
K14113 energy-converting hydrogenase B subunit D	0	0	0	1	0	0	1	0	1	0	0	0	0	1	1	0	0	0	2	0	0	0	0	0	0	3	0	0	0	0	0	1	0	2	0	0	0	1	1	0	1	2	0	0	0	0	2	1	1
K21583 sarcosine reductase complex component B subunit alpha [EC:1.21.4.3]	0	1	0	0	0	0	0	0	3	0	0	0	1	1	2	0	0	3	0	1	1	0	0	0	2	0	2	1	0	0	0	0	0	1	0	0	1	0	1	0	0	0	1	4	1	0	0	0	0
K14081 methanol corrinoid protein	2	8	6	9	15	8	4	1	6	6	6	2	2	5	8	5	6	3	8	9	7	13	37	5	10	15	8	14	23	19	6	13	8	8	8	0	3	0	0	1	4	0	2	2	1	2	1	0	0
K00695 sucrose synthase [EC:2.4.1.13]	6	10	2	0	2	2	7	2	4	1	9	0	1	11	6	5	0	0	2	0	5	3	0	0	5	2	1	1	11	1	1	1	5	0	0	5	25	5	2	0	0	0	2	0	1	1	11	1	3
K00945 CMP/dCMP kinase [EC:2.7.4.25]	35	25	17	17	34	22	13	20	27	26	30	49	21	28	18	12	27	32	36	12	34	40	141	78	27	14	34	40	53	103	47	26	39	37	88	76	83	30	28	13	23	18	23	16	26	15	41	17	18
K09919 uncharacterized protein	10	20	5	0	6	4	4	6	2	1	2	1	10	6	2	14	13	2	7	0	2	8	0	0	5	2	3	4	5	12	1	2	6	3	0	0	1	1	3	2	0	1	1	0	0	0	3	2	8
K00078 dihydrodiol dehydrogenase / D-xylose 1-dehydrogenase (NADP) [EC:1.3.1.20 1.1.1.179]	8	13	3	0	2	3	3	3	8	2	2	4	10	14	4	0	12	6	3	1	7	12	15	14	3	2	8	7	18	23	5	1	0	9	22	1	7	6	6	1	1	2	4	3	2	0	2	4	7
K03621 phosphate acyltransferase [EC:2.3.1.274]	72	35	26	30	45	44	33	54	36	29	54	61	34	59	43	13	71	49	29	22	57	49	147	161	52	21	54	32	132	231	65	11	40	60	185	116	46	28	45	17	23	27	27	28	26	22	27	23	37
K02600 transcription termination/antitermination protein NusA	191	162	50	48	115	143	79	108	79	53	111	113	121	133	68	44	148	141	65	37	76	94	323	290	140	44	91	89	268	601	108	31	66	146	264	394	171	91	111	59	79	71	62	105	76	77	74	78	81
K13239 Delta3-Delta2-enoyl-CoA isomerase [EC:5.3.3.8]	0	1	0	0	1	0	0	0	0	0	0	0	0	0	0	0	0	0	0	0	0	0	0	0	0	0	0	0	0	0	0	1	0	0	0	0	0	0	1	0	0	1	0	2	0	0	0	0	0
K22268 xylan 1,4-beta-xylosidase [EC:3.2.1.37]	0	0	0	0	0	0	0	1	0	0	0	0	3	0	0	0	0	1	0	0	0	0	1	0	0	0	0	0	0	4	0	0	0	0	10	13	0	1	0	1	0	0	1	0	0	0	1	1	0
K20838 N-acetyltransferase 8 [EC:2.3.1.80 2.3.1.-]	0	0	0	0	0	0	0	0	0	0	0	0	0	0	0	0	0	0	0	0	0	0	0	0	0	0	0	0	0	0	0	0	0	0	0	0	0	0	0	0	0	0	0	0	0	0	0	0	0
K16394 epothilone polyketide synthase A	0	0	0	0	0	0	0	0	0	0	0	0	0	0	0	0	0	0	0	0	0	0	0	0	0	0	0	0	0	0	0	0	0	0	0	0	0	0	0	0	0	0	0	0	0	0	0	0	0
K16126 L-threonine---[L-threonyl-carrier protein] ligase [EC:6.2.1.70]	3	0	1	0	0	0	0	0	1	0	0	0	0	0	0	0	0	0	0	0	0	0	0	0	0	0	0	0	0	8	0	0	0	0	0	0	0	1	0	0	0	0	0	0	0	0	0	0	0
K09159 antitoxin CptB	0	0	0	0	0	0	4	1	1	0	0	0	0	2	0	0	0	0	0	0	1	0	0	0	0	0	0	0	0	0	0	0	0	0	0	0	0	1	0	0	0	1	0	0	0	0	0	0	1
K18458 N-acyl-aromatic-L-amino acid amidohydrolase [EC:3.5.1.114]	0	0	0	0	0	0	0	1	0	0	0	0	0	0	0	0	0	0	0	0	0	0	0	0	0	0	0	0	0	0	1	0	0	0	0	0	0	0	0	0	0	0	0	0	0	0	0	0	0
K14060 putative DNA-invertase from lambdoid prophage Rac	9	9	10	7	12	8	11	12	7	12	12	4	13	9	13	0	2	12	7	1	9	9	2	14	13	7	6	6	8	12	16	4	11	10	8	4	6	6	7	2	3	3	1	2	0	2	0	2	10
K02386 flagellar basal body P-ring formation protein FlgA	1	3	2	0	0	1	1	2	4	0	0	0	2	2	1	0	0	0	3	2	0	1	6	2	0	0	1	0	3	12	1	0	3	1	0	0	3	0	0	0	1	0	0	0	0	0	4	1	2
K00786 beta-1,6-galactosyltransferase [EC:2.4.1.-]	39	49	22	31	33	69	29	54	34	22	57	63	48	47	38	26	43	43	29	28	51	60	99	123	32	9	35	66	108	118	34	28	46	80	141	110	33	9	28	20	37	18	20	21	17	34	20	20	19
K10201 N-acetylglucosamine transport system permease protein	1	2	0	0	0	0	0	0	0	0	0	0	0	0	1	0	0	0	0	0	2	0	0	8	0	0	1	0	0	2	6	0	0	1	3	0	0	0	0	0	0	0	2	0	0	2	0	0	0
K22063 iron-sulfur cluster assembly 1	2	1	0	2	0	0	0	5	1	0	0	0	1	1	0	0	0	0	1	0	0	3	0	0	2	0	0	0	1	0	4	0	0	0	0	0	1	1	3	0	2	0	0	0	0	2	2	0	1
K20525 oligo-alginate lyase [EC:4.2.2.26]	5	3	4	5	2	3	2	1	8	5	0	5	4	3	0	0	0	0	0	0	4	3	0	0	4	1	2	1	0	0	0	0	0	2	4	0	0	1	4	2	4	3	2	3	3	3	3	0	2
K18559 NADH-dependent fumarate reductase subunit D	1	0	0	0	4	2	1	0	0	2	0	0	0	0	0	12	0	0	0	0	2	0	1	2	1	0	0	1	0	1	0	0	0	0	0	0	0	0	0	0	0	0	3	0	0	0	0	0	0
K06156 Gnt-I system low-affinity gluconate transporter	1	1	3	1	0	2	1	0	1	0	3	0	0	6	1	0	0	1	0	4	0	2	12	12	0	0	1	2	3	4	5	2	0	1	11	0	0	1	2	0	0	0	3	2	2	0	0	0	0
K16038 N-methyltransferase [EC:2.1.1.-]	0	0	1	0	0	0	0	0	0	0	0	0	0	0	0	0	0	0	0	0	0	0	0	0	0	0	0	0	0	0	0	0	0	0	0	0	0	0	0	0	0	0	0	0	1	0	0	0	0
K03190 urease accessory protein	1	0	0	0	0	0	1	0	0	0	0	0	0	0	0	0	0	0	4	0	0	0	0	0	1	0	0	0	0	0	2	0	1	0	0	0	0	4	0	0	1	0	0	0	0	0	0	0	0
K08961 chondroitin-sulfate-ABC endolyase/exolyase [EC:4.2.2.20 4.2.2.21]	1	0	7	0	0	7	0	0	1	0	1	2	0	0	1	2	0	1	0	0	3	0	9	3	0	0	0	2	3	8	0	0	4	3	8	2	0	0	1	3	1	0	1	0	3	1	0	1	0
K07101 uncharacterized protein	11	9	6	3	18	11	14	8	10	3	4	2	17	17	21	10	1	11	5	3	7	4	19	14	5	9	2	10	15	22	9	3	0	6	21	3	3	4	7	1	5	2	5	6	9	4	2	4	1
K09933 MtfA peptidase	6	2	3	4	1	1	0	1	2	1	4	0	3	0	3	0	15	1	3	4	4	1	2	7	1	1	0	4	1	20	0	0	1	6	0	5	0	2	2	2	3	0	0	2	5	1	2	4	1
K18301 TetR/AcrR family transcriptional regulator, mexJK operon transcriptional repressor	1	0	0	1	0	0	1	0	0	0	0	0	0	1	2	0	0	0	1	0	0	2	0	0	0	1	0	0	0	0	0	0	1	0	0	0	0	1	2	0	0	0	1	0	1	1	0	2	1
K01301 N-acetylated-alpha-linked acidic dipeptidase [EC:3.4.17.21]	23	13	11	9	12	5	11	7	7	8	18	23	13	8	10	4	32	4	1	3	0	0	4	0	1	1	0	8	0	6	1	0	2	2	0	0	3	3	2	1	0	1	0	0	0	0	0	4	1
K03713 MerR family transcriptional regulator, glutamine synthetase repressor	3	2	0	0	0	0	0	0	0	0	0	3	0	1	0	0	0	0	0	0	0	2	0	0	0	0	0	1	1	0	0	0	2	0	0	0	1	0	1	0	0	0	0	0	0	0	0	0	0
K12080 type IV secretion system protein PtlC [EC:7.4.2.8]	0	0	0	0	0	0	0	0	0	0	0	0	0	0	0	0	0	0	0	0	0	0	0	0	0	0	0	0	0	0	0	0	0	0	0	0	0	0	0	0	0	1	0	0	0	0	0	0	0
K08963 methylthioribose-1-phosphate isomerase [EC:5.3.1.23]	45	48	21	13	32	69	29	25	25	18	40	57	21	43	16	20	14	74	21	18	34	50	135	135	33	20	34	40	98	163	45	23	41	65	137	213	38	21	11	8	31	16	17	20	33	25	23	28	21
K03575 A/G-specific adenine glycosylase [EC:3.2.2.31]	13	5	4	5	6	9	10	4	11	5	6	14	13	15	2	8	9	9	8	4	11	3	35	16	10	6	9	9	27	1	13	0	7	12	6	14	35	8	10	5	6	5	4	1	4	7	16	9	7
K21735 acyl-lipid (8-3)-desaturase [EC:1.14.19.30]	1	0	2	0	0	0	0	0	0	0	0	0	0	0	0	0	0	0	0	0	0	0	0	0	0	0	0	0	0	0	0	0	0	0	0	0	2	0	0	0	0	0	0	0	0	0	0	0	0
K08164 MFS transporter, DHA1 family, putative efflux transporter	0	0	0	0	0	0	0	0	0	0	0	0	0	0	0	0	0	0	0	0	0	0	0	0	0	0	0	0	0	0	0	0	0	0	0	0	0	0	1	0	0	0	0	0	0	0	0	0	0
K19958 naphthyl-2-hydroxymethylsuccinyl-CoA dehydrogenase BnsD subunit [EC:1.1.-.-]	1	1	2	0	1	3	1	0	0	1	1	0	0	10	1	0	0	0	0	1	0	2	2	0	0	1	0	0	2	10	0	0	0	2	6	0	0	0	0	0	1	2	1	1	0	1	0	2	0
K14415 tRNA-splicing ligase RtcB (3'-phosphate/5'-hydroxy nucleic acid ligase) [EC:6.5.1.8]	53	59	44	34	79	121	52	57	36	40	122	106	54	57	46	49	73	124	29	44	75	96	179	201	40	33	49	100	138	416	41	26	67	84	245	164	58	25	29	24	56	37	42	48	70	60	32	32	34
K07667 two-component system, OmpR family, KDP operon response regulator KdpE	10	8	1	8	11	2	3	5	9	5	7	6	6	8	6	1	0	8	7	6	11	6	30	28	3	3	9	5	38	18	17	3	5	12	40	35	6	7	2	4	6	2	5	5	4	5	7	7	4
K19640 putative two-component system protein, hydrogenase maturation factor HypX/HoxX	3	0	0	0	0	0	1	0	0	0	0	0	0	0	0	0	0	0	0	0	0	0	0	0	2	0	0	0	0	0	0	0	0	0	0	0	0	0	0	0	0	0	0	0	0	0	2	0	0
K12625 U6 snRNA-associated Sm-like protein LSm6	0	0	0	0	0	2	0	0	0	0	0	0	0	0	0	0	0	0	0	0	1	0	0	5	0	4	1	0	3	11	0	0	0	0	4	0	0	0	4	0	7	1	2	0	0	1	0	1	1
K04752 nitrogen regulatory protein P-II 2	60	28	5	2	5	0	35	9	6	5	1	0	59	11	6	0	0	1	2	7	12	6	11	20	12	7	0	5	6	7	27	4	0	7	14	25	14	13	7	3	7	1	3	0	4	0	9	4	8
K08086 pilus assembly protein FimV	27	20	3	0	3	0	9	13	4	1	2	1	20	9	2	5	0	0	4	0	0	0	0	0	13	4	5	1	4	0	11	0	0	5	0	0	10	8	1	2	1	2	0	0	0	0	8	7	2
K21561 CRP/FNR family transcriptional regulator, global nitrogen regulator	0	0	0	0	0	0	0	0	0	0	0	0	0	0	0	0	0	0	1	2	0	0	0	0	6	0	0	0	1	0	3	0	0	0	0	0	1	1	1	1	1	1	0	0	1	0	0	1	0
K04023 ethanolamine transporter	0	0	0	0	0	0	0	0	0	0	0	0	1	0	0	0	0	0	0	0	0	2	0	0	0	0	0	0	0	0	0	0	0	0	0	0	0	0	0	1	0	0	0	0	0	0	0	0	0
K03632 chromosome partition protein MukB	0	0	0	0	0	0	0	0	0	0	0	0	0	0	0	0	0	0	0	0	0	0	0	0	0	0	1	0	0	0	0	0	0	0	0	0	0	0	0	0	0	0	0	0	0	0	0	0	0
K18703 succinate---hydroxymethylglutarate CoA-transferase [EC:2.8.3.13]	87	209	228	260	371	413	90	196	263	237	406	308	75	182	242	298	264	441	106	415	203	207	437	370	112	274	207	232	278	521	80	384	141	173	430	348	32	220	736	283	246	55	29	16	8	22	121	611	478
K15641 myxalamid-type polyketide synthase MxaF	1	1	1	1	2	1	2	0	0	0	0	1	0	1	0	0	0	3	0	3	0	0	0	2	3	0	1	0	7	17	1	1	0	0	0	0	14	4	4	0	1	0	0	0	1	0	10	0	2
K02036 phosphate transport system ATP-binding protein [EC:7.3.2.1]	17	11	3	1	2	1	2	6	2	2	0	21	14	10	3	1	14	2	9	2	9	10	18	12	29	2	10	18	20	51	15	2	2	5	7	24	29	14	15	6	17	15	25	6	9	3	14	15	11
K07339 mRNA interferase HicA [EC:3.1.-.-]	3	3	2	1	1	2	0	1	1	2	2	5	0	1	6	0	0	7	5	3	6	5	9	9	6	4	1	1	12	37	3	1	11	10	10	0	17	6	2	7	5	6	7	4	6	4	18	5	6
K18014 3-aminobutyryl-CoA ammonia-lyase [EC:4.3.1.14]	2	0	0	1	0	0	0	0	0	0	0	0	0	0	0	0	0	1	0	1	0	1	0	8	1	0	0	0	0	8	0	0	3	2	0	0	1	0	0	0	1	1	0	1	1	1	1	0	3
K09490 endoplasmic reticulum chaperone BiP [EC:3.6.4.10]	1	0	0	0	1	0	0	2	0	0	0	0	0	0	0	0	0	0	0	0	0	0	0	0	0	0	0	0	0	1	0	0	0	0	0	0	1	1	0	1	2	1	0	1	0	0	1	0	1
K05802 potassium-dependent mechanosensitive channel	26	17	15	11	10	6	24	25	15	9	8	7	23	40	21	12	0	7	21	13	14	24	27	25	23	12	18	20	33	36	29	18	23	12	29	24	25	7	5	4	3	3	8	15	11	7	7	12	11
K01854 UDP-galactopyranose mutase [EC:5.4.99.9]	19	9	14	14	11	22	9	10	9	12	14	22	16	21	15	7	0	22	7	7	26	9	34	23	9	9	15	6	20	65	17	4	25	13	76	27	20	2	13	8	11	4	2	4	6	8	6	5	5
K03396 S-(hydroxymethyl)glutathione synthase [EC:4.4.1.22]	0	1	0	0	0	0	0	1	0	0	0	0	2	0	0	0	0	0	0	0	0	0	0	0	0	0	0	0	0	0	0	0	0	0	0	0	0	0	0	0	0	0	0	0	0	0	0	0	0
K01597 diphosphomevalonate decarboxylase [EC:4.1.1.33]	4	4	6	0	2	1	2	3	1	0	0	2	7	5	0	0	5	10	6	0	3	5	4	3	6	0	1	1	5	3	2	0	0	0	4	0	0	1	5	1	1	3	2	1	1	0	0	4	3
K00819 ornithine--oxo-acid transaminase [EC:2.6.1.13]	33	38	20	30	30	26	22	6	19	27	28	39	33	40	22	17	15	48	39	17	40	44	60	60	33	22	22	32	92	117	89	27	32	35	84	29	50	21	31	14	27	21	19	16	10	13	26	30	17
K08781 carboxypeptidase A5 [EC:3.4.17.1]	0	0	0	0	0	4	0	0	0	0	0	0	0	0	0	0	0	0	0	0	0	4	0	0	0	0	0	0	0	4	0	0	0	1	0	0	0	0	0	0	0	0	0	0	0	1	0	1	0
K02898 large subunit ribosomal protein L26e	1	1	0	0	4	3	0	0	0	1	3	9	0	0	0	0	16	6	0	0	0	1	3	4	0	1	1	0	9	3	0	0	1	3	8	0	0	0	0	0	0	1	0	1	1	0	0	0	0
K00311 electron-transferring-flavoprotein dehydrogenase [EC:1.5.5.1]	38	38	10	1	18	19	28	26	13	14	19	23	30	34	14	7	6	22	18	14	14	29	25	24	24	13	7	14	64	65	25	15	19	17	23	39	10	9	14	6	14	9	8	2	4	6	9	17	13
K04479 DNA polymerase IV (archaeal DinB-like DNA polymerase) [EC:2.7.7.7]	0	0	2	0	0	1	1	1	0	0	0	0	1	2	0	0	0	4	0	0	2	3	2	0	4	5	0	4	4	36	1	0	3	5	21	1	0	1	0	1	0	1	1	1	1	1	1	3	0
K19204 pimaricinolide synthase PimS2	0	0	0	0	0	0	0	0	0	0	0	0	0	0	0	0	0	3	0	0	0	0	0	0	0	0	0	0	0	0	0	0	0	0	0	0	0	0	0	0	0	0	0	0	0	0	0	0	0
K05837 rod shape determining protein RodA	16	16	20	7	13	17	9	6	15	11	14	23	10	11	9	11	2	12	10	9	15	26	51	50	36	8	17	16	44	81	16	6	15	24	61	45	12	9	12	5	9	10	7	8	14	17	7	21	7
K03835 tryptophan-specific transport protein	0	0	0	0	0	0	0	0	0	0	0	0	0	0	0	0	0	0	0	0	2	0	0	0	0	0	0	0	0	0	0	0	0	0	0	0	0	0	0	0	0	0	0	0	0	0	0	0	0
K21992 lysine N-acyltransferase [EC:2.3.1.-]	0	0	0	0	0	0	0	0	0	0	0	0	0	0	0	0	0	0	0	0	0	0	0	0	0	0	0	0	0	0	0	0	0	0	0	0	0	0	0	0	0	0	0	0	0	0	0	0	0
K11169 dehydrogenase/reductase SDR family member 13 [EC:1.1.-.-]	3	4	1	0	0	0	2	0	0	0	1	0	2	2	1	0	0	2	0	0	0	0	0	0	2	0	2	0	2	0	2	0	0	0	0	0	1	0	2	1	0	0	0	1	0	0	0	0	0
K00569 thiopurine S-methyltransferase [EC:2.1.1.67]	4	2	0	0	0	1	6	2	0	0	0	0	1	2	0	0	0	0	1	0	0	0	0	0	6	1	0	0	2	0	2	1	1	1	0	0	1	0	1	0	0	0	0	0	0	0	1	1	2
K03181 chorismate lyase [EC:4.1.3.40]	0	0	0	0	0	0	0	0	0	0	0	0	0	0	0	0	0	0	0	0	0	0	0	0	0	0	0	0	0	0	0	0	0	0	0	0	0	0	0	0	0	0	0	0	0	0	0	0	0
K10941 sigma-54 dependent transcriptional regulator, flagellar regulatory protein	34	23	10	10	12	17	11	4	15	4	19	16	19	18	5	6	8	8	9	16	10	21	33	42	28	18	26	21	34	38	32	7	16	11	15	62	22	7	11	3	4	3	10	3	4	6	14	13	6
K00277 protein-lysine 6-oxidase [EC:1.4.3.13]	0	0	0	0	0	0	0	0	0	0	0	0	0	0	0	0	0	0	0	0	0	0	0	0	0	0	0	0	0	0	0	0	0	0	0	0	0	0	0	0	0	0	0	0	0	0	0	0	0
K01613 phosphatidylserine decarboxylase [EC:4.1.1.65]	40	26	24	10	23	28	18	19	19	14	17	35	26	29	11	3	7	21	31	22	21	23	75	59	40	13	15	33	28	76	49	6	10	16	30	26	24	13	24	6	13	18	12	17	9	14	13	20	11
K17998 iron-hydrogenase subunit beta [EC:1.12.1.4]	0	2	1	0	2	0	0	1	0	0	1	0	1	0	3	0	0	1	0	0	0	1	4	0	0	0	0	0	0	0	0	1	0	0	0	0	1	0	0	0	0	1	0	0	0	0	1	0	1
K19079 cationic antimicrobial peptide transport system ATP-binding protein	1	0	0	0	0	0	0	0	0	0	0	0	0	0	0	1	0	0	0	0	0	0	0	0	0	0	0	0	0	0	0	0	0	0	0	0	0	0	0	0	0	0	0	0	0	0	0	0	0
K13981 1,5-anhydro-D-fructose reductase [EC:1.1.1.263]	1	0	0	0	0	0	0	0	0	0	0	0	0	0	0	0	0	0	0	0	0	0	0	0	0	0	0	0	0	0	0	0	0	0	0	0	0	0	0	0	0	0	0	0	0	0	0	0	0
K01908 propionyl-CoA synthetase [EC:6.2.1.17]	40	52	13	11	2	7	57	36	40	18	7	5	46	61	19	18	0	8	114	34	51	42	3	14	119	33	21	10	52	39	194	32	5	16	0	0	325	41	34	16	18	10	13	13	8	8	84	50	39
K03471 ribonuclease HIII [EC:3.1.26.4]	3	0	0	0	3	1	1	1	0	0	0	0	2	0	0	2	0	2	1	0	0	3	2	0	0	0	3	0	2	12	0	2	0	7	3	0	2	0	0	0	0	0	0	0	5	0	0	1	3
K12139 hydrogenase-4 component D [EC:1.-.-.-]	0	0	0	0	0	3	0	1	0	0	0	0	0	0	0	0	0	0	0	0	0	0	10	3	0	0	0	0	5	8	0	0	2	2	3	0	35	7	1	0	1	0	1	0	2	6	26	10	5
K10020 octopine/nopaline transport system permease protein	0	1	0	2	0	0	0	1	0	1	1	0	0	0	3	0	0	0	0	0	0	0	4	0	0	1	4	1	1	0	0	0	4	0	0	0	3	0	1	0	0	0	0	0	0	0	1	0	0
K08100 bilirubin oxidase [EC:1.3.3.5]	119	186	39	31	18	5	89	126	53	29	16	3	100	192	84	21	40	10	4	5	3	4	2	1	32	2	5	1	14	18	12	3	0	1	4	0	6	5	9	7	3	3	6	2	2	2	8	10	5
K07884 Ras-related protein Rab-3D	1	0	0	0	1	0	0	0	0	0	0	0	0	0	0	0	0	0	0	0	1	0	6	0	0	0	0	2	0	0	0	3	1	2	3	0	0	0	0	0	0	0	0	0	0	0	0	0	0
K07874 Ras-related protein Rab-1A	0	0	0	0	3	14	1	3	0	5	12	18	8	3	0	0	6	9	0	3	10	13	48	37	2	1	12	11	8	82	5	0	10	9	22	6	1	3	8	3	10	9	8	2	4	12	0	3	7
K18139 outer membrane protein, multidrug efflux system	8	29	20	8	30	10	17	17	14	11	17	9	6	27	16	47	30	15	3	6	5	13	10	2	6	8	5	2	11	1	13	1	5	6	9	4	6	4	8	5	3	7	6	2	7	7	7	7	8
K09120 uncharacterized protein	0	0	0	0	3	1	0	0	0	0	0	0	0	0	1	0	0	4	1	3	4	0	3	9	0	0	1	0	3	9	0	0	0	3	0	0	0	0	0	1	3	1	0	0	0	0	0	0	0
K05811 putative lipoprotein	0	0	0	0	0	0	0	0	0	0	0	0	0	0	0	0	0	0	0	0	0	0	0	0	0	0	0	0	1	0	0	0	0	0	0	0	0	0	0	0	0	0	0	0	0	0	0	0	0
K21021 diguanylate cyclase [EC:2.7.7.65]	0	0	2	0	0	0	0	2	0	0	0	0	0	0	0	0	0	0	0	0	0	0	0	0	1	0	0	1	0	14	0	0	0	0	0	0	0	1	0	0	2	0	2	0	0	0	1	0	0
K25026 glucokinase [EC:2.7.1.2]	4	3	1	0	0	0	4	1	4	2	0	2	8	4	1	0	0	1	2	0	1	5	1	4	2	0	1	3	4	5	2	2	0	0	1	17	5	5	2	6	10	2	7	0	2	1	1	7	1
K18652 glucose-6-phosphate 3-dehydrogenase [EC:1.1.1.361]	4	0	0	0	1	0	0	2	2	1	0	0	0	2	0	5	0	0	1	0	1	2	1	3	1	2	2	0	0	9	1	0	0	1	3	0	0	0	0	1	1	1	0	0	1	0	0	0	1
K18254 phthalate 3,4-dioxygenase ferredoxin reductase component [EC:1.18.1.3]	0	0	0	0	0	0	0	0	0	0	0	0	0	0	0	0	0	0	0	0	0	0	0	0	0	1	0	0	0	0	0	0	0	0	0	0	0	0	0	0	0	0	0	0	0	0	0	0	0
K08355 arsenite oxidase small subunit [EC:1.20.2.1 1.20.9.1]	6	11	0	3	2	2	12	9	4	2	1	0	8	11	1	0	0	4	0	0	0	0	0	0	1	0	0	0	3	0	0	0	0	0	0	0	0	0	1	0	0	0	0	1	0	0	0	0	0
K02278 prepilin peptidase CpaA [EC:3.4.23.43]	11	24	38	14	24	9	11	13	23	10	6	4	12	13	21	12	26	16	6	10	14	18	49	23	8	13	13	12	14	20	11	4	10	15	16	11	0	4	6	3	8	7	6	1	2	7	5	15	4
K21030 D-ribitol-5-phosphate cytidylyltransferase [EC:2.7.7.40]	0	0	0	0	0	0	0	0	0	0	0	0	0	0	0	1	0	0	0	0	0	0	0	0	0	0	0	0	0	0	0	0	0	0	0	0	0	0	0	0	0	0	0	0	0	0	0	1	0
K13997 dihydrolipoamide dehydrogenase-binding protein of pyruvate dehydrogenase complex	0	0	0	0	0	0	0	0	0	0	0	0	0	0	2	0	0	0	0	0	0	0	0	0	0	0	0	0	0	0	0	0	0	1	0	0	0	0	0	0	0	1	0	0	0	0	0	0	0
K22003 aconitate Delta-isomerase [EC:5.3.3.7]	1	0	0	0	0	0	0	0	0	0	0	0	0	0	0	0	0	0	0	0	0	0	0	0	0	0	0	0	0	0	0	0	0	0	0	0	0	2	0	0	0	0	0	0	0	0	0	0	0
K19243 NAD+ dependent glucose-6-phosphate dehydrogenase [EC:1.1.1.388]	7	2	3	0	0	3	1	2	0	1	3	0	1	3	3	1	0	1	2	0	0	2	11	6	0	0	0	6	1	8	1	1	0	0	0	0	0	0	4	2	0	1	0	0	1	0	0	0	0
K19969 2-epi-5-epi-valiolone synthase [EC:4.2.3.152]	2	3	2	0	0	0	2	0	0	5	0	0	2	0	0	0	0	0	0	0	1	1	1	0	1	2	2	4	0	0	3	0	1	5	0	0	1	0	0	0	1	1	0	0	0	0	0	1	0
K05306 phosphonoacetaldehyde hydrolase [EC:3.11.1.1]	17	7	4	2	2	2	0	7	8	2	2	3	8	6	4	9	0	0	0	3	2	3	3	3	1	1	1	0	2	3	7	4	1	4	14	20	6	2	2	4	2	1	2	2	1	1	1	2	1
K00759 adenine phosphoribosyltransferase [EC:2.4.2.7]	47	32	18	17	32	39	14	28	26	18	42	41	37	26	24	24	40	64	18	21	25	36	87	98	21	23	31	26	79	125	43	17	37	64	111	25	11	14	18	13	46	18	23	14	19	19	12	11	14
K19129 CRISPR-associated protein Csy3	0	0	0	0	1	0	6	0	0	0	0	1	1	1	0	2	0	0	0	0	3	1	0	0	1	0	0	0	1	0	0	0	2	0	0	0	3	1	0	0	0	2	0	1	2	1	0	1	0
K11073 putrescine transport system substrate-binding protein	43	38	11	3	6	7	29	31	9	4	4	4	36	28	18	7	0	1	17	7	4	11	4	0	25	5	5	6	13	4	20	7	5	5	0	41	16	11	7	3	2	4	3	1	1	1	7	5	8
K08591 acyl phosphate:glycerol-3-phosphate acyltransferase [EC:2.3.1.275]	11	25	8	10	13	18	11	4	11	10	8	33	11	15	7	9	36	11	12	18	14	34	106	137	11	5	14	23	37	149	25	4	17	27	74	117	18	13	19	6	17	12	16	15	12	18	17	11	13
K20542 endoglucanase [EC:3.2.1.4]	1	0	0	0	0	0	1	0	0	0	0	0	0	0	0	0	0	0	2	0	0	0	0	0	0	0	1	0	0	0	0	0	0	0	6	0	0	0	1	0	0	0	0	0	0	0	0	0	0
K14448 (2S)-methylsuccinyl-CoA dehydrogenase [EC:1.3.8.12]	6	6	0	1	3	2	13	2	1	2	0	9	4	3	2	4	0	0	0	4	6	2	8	9	3	1	3	1	12	3	1	3	5	6	3	11	0	1	4	0	0	0	2	0	0	0	1	6	1
K11066 N-acetylmuramoyl-L-alanine amidase [EC:3.5.1.28]	0	0	0	3	0	0	0	0	0	0	0	2	0	0	0	0	0	0	0	0	0	0	0	0	0	1	0	0	0	0	0	0	0	0	0	0	0	0	0	0	0	0	0	0	0	0	0	0	0
K07657 two-component system, OmpR family, phosphate regulon response regulator PhoB	28	25	17	29	11	40	20	32	16	23	18	27	25	32	21	6	31	21	21	16	32	20	64	40	28	20	17	28	50	74	26	13	27	31	64	40	12	14	19	10	16	14	19	14	18	15	13	16	19
K01833 trypanothione synthetase/amidase [EC:6.3.1.9 3.5.1.-]	0	0	0	0	0	0	0	0	0	0	0	0	0	0	0	0	0	0	0	0	0	0	0	0	0	0	0	0	0	0	0	0	0	0	0	0	0	0	0	0	0	0	0	0	0	0	0	0	0
K10697 two-component system, OmpR family, response regulator RpaA	4	2	6	0	3	0	2	2	1	2	0	0	4	2	0	4	0	0	0	1	2	0	0	1	0	0	0	0	2	6	2	2	0	0	0	0	3	0	2	3	0	2	0	2	0	0	0	0	0
K03238 translation initiation factor 2 subunit 2	0	4	0	4	7	7	0	4	0	1	13	13	2	0	6	0	1	7	0	6	8	0	29	45	4	2	11	5	17	22	2	6	3	14	14	45	2	2	3	3	20	6	7	6	6	11	0	2	4
K04045 molecular chaperone HscC	2	1	0	0	2	0	0	0	0	0	0	0	0	0	0	0	0	1	0	0	1	0	0	0	0	0	0	0	0	0	1	0	0	0	0	0	0	0	0	1	0	0	0	0	0	0	0	0	0
K17218 sulfide:quinone oxidoreductase [EC:1.8.5.4]	117	164	43	27	51	32	132	150	75	60	30	47	98	140	54	12	68	40	93	40	81	101	131	132	298	57	52	31	291	116	385	21	26	71	145	101	149	83	82	27	13	26	34	39	10	6	68	89	55
[truncated: 7,866 more rows]
[truncated: 47 more columns]
