# Supplementary material for: Evidence for cable bacteria inhabiting deep in anoxic sediment reveals a novel ecological niche
Source: Research Square preprint supplement (doi:10.21203/rs.3.rs-6914568/v1), 2025-07-02
Supplement: Supplementary file 4 [file b12f45760581aa1b1b387b7b.xlsx]

## Sheet: pore_water
		Depth	ΣH2S			Depth	SiO2	SO42-	Fe2+	Mn2+	Ni2+	HPO42-	NH4+	NO3-	NO2-
	Place	[cm]	[µM]		Place	[cm]	[µM]	[µM]	[µM]	[µM]	[µM]	[µM]	[µM]	[µM]	[µM]
	Nearshore Tvärminne	0	0.630011		Nearshore Tvärminne	0	56.0949	5952.38	0.44325	2.65391	0.0214966	1.79465	ND	ND	ND		ND: No data
	Nearshore Tvärminne	0.5	0.209588		Nearshore Tvärminne	1.5	85.7682	6648.25	52.054	9.89185	0.0380829	25.8966	ND	ND	ND
	Nearshore Tvärminne	2.5	0.629694		Nearshore Tvärminne	3.5	81.1941	5795.51	29.8436	5.4465	0.022921	16.3642	ND	ND	ND
	Nearshore Tvärminne	4.5	1.05883		Nearshore Tvärminne	5.5	120.919	5401.67	10.9499	5.09252	0.0237268	46.8119	ND	ND	ND
	Nearshore Tvärminne	6.5	6.31097		Nearshore Tvärminne	7.5	132.005	5261.44	1.45418	4.27962	0.0378955	56.8106	ND	ND	ND
	Nearshore Tvärminne	8.5	82.388		Nearshore Tvärminne	9.5	160.172	5374.61	1.03232	5.45375	0.0238018	71.0395	ND	ND	ND
	Nearshore Tvärminne	10.5	185.492		Nearshore Tvärminne	11.5	212.043	4157.83	1.30355	7.99521	0.0258634	101.311	ND	ND	ND
	Nearshore Tvärminne	12.5	328.854		Nearshore Tvärminne	13.5	161.851	5125.85	1.15513	8.48084	0.0246077	64.0328	ND	ND	ND
	Nearshore Tvärminne	14.5	402.896		Nearshore Tvärminne	15.5	287.19	3306.65	1.32622	13.1947	0.0252074	144.677	ND	ND	ND
	Nearshore Tvärminne	16.5	375.752		Nearshore Tvärminne	17.5	462.202	1947.99	2.33361	20.7545	0.0248513	245.679	ND	ND	ND
	Nearshore Tvärminne	18.5	360.086		Nearshore Tvärminne	19.5	518.884	1596.58	2.70287	26.8347	0.0285997	264.858	ND	ND	ND
	Nearshore Tvärminne	20.5	279.568		Nearshore Tvärminne	21.5	642.623	859.935	0.528441	38.1758	0.0274002	355.632	ND	ND	ND
	Nearshore Tvärminne	22.5	261.224		Nearshore Tvärminne	23.5	686.01	433.847	0.390678	45.5453	0.0304926	387.264	ND	ND	ND
	Nearshore Tvärminne	24.5	236.088		Nearshore Tvärminne	25.5	695.864	451.024	0.531888	51.7758	0.0315796	390.552	ND	ND	ND
	Nearshore Tvärminne	26.5	117.498		Nearshore Tvärminne	27.5	737.287	219.324	0.54156	61.8181	0.0293681	409.732	ND	ND	ND
	Nearshore Tvärminne	28.5	101.351		Nearshore Tvärminne	29.5	729.797	152.376	0.916913	72.1715	0.0276251	420.403	ND	ND	ND
	Offshore Tvärminne	0	11.9704		Offshore Tvärminne	0	82.4192	5345.91	1.14456	2.76235	0.0209156	7.11708	ND	ND	ND
	Offshore Tvärminne	0.5	127.88		Offshore Tvärminne	1.5	156.426	4904.55	0.882856	4.89546	0.0229772	27.516	ND	ND	ND
	Offshore Tvärminne	2.5	516.876		Offshore Tvärminne	3.5	147.46	5156.27	1.1523	3.2795	0.0270441	23.2039	ND	ND	ND
	Offshore Tvärminne	4.5	963.515		Offshore Tvärminne	5.5	184.08	5397.24	0.99779	3.10838	0.0219089	33.3549	ND	ND	ND
	Offshore Tvärminne	6.5	589.176		Offshore Tvärminne	7.5	194.108	4804.56	0.992058	2.98777	0.021684	42.077	ND	ND	ND
	Offshore Tvärminne	8.5	773.239		Offshore Tvärminne	9.5	355.115	3537.76	0.646074	2.36144	0.0283748	108.078	ND	ND	ND
	Offshore Tvärminne	10.5	638.265		Offshore Tvärminne	11.5	468.107	3066.28	0.675994	1.80443	0.0291432	130.504	ND	ND	ND
	Offshore Tvärminne	12.5	489.954		Offshore Tvärminne	13.5	645.467	1891.47	0.45885	0.954956	0.042431	217.945	ND	ND	ND
	Offshore Tvärminne	14.5	785.616		Offshore Tvärminne	15.5	707.773	1703.36	1.58343	1.37439	0.0510146	258.878	ND	ND	ND
	Offshore Tvärminne	16.5	707.722		Offshore Tvärminne	17.5	704.501	1305.71	9.71035	2.2011	0.0483533	286.919	ND	ND	ND
	Offshore Tvärminne	18.5	589.084		Offshore Tvärminne	19.5	739.494	1132.22	1.98873	3.29111	0.0557375	319.388	ND	ND	ND
	Offshore Tvärminne	20.5	493.268		Offshore Tvärminne	21.5	772.666	981.68	0.577133	4.70412	0.0566558	369.774	ND	ND	ND
	Offshore Tvärminne	22.5	544.24		Offshore Tvärminne	23.5	817.872	481.47	2.33997	6.35448	0.0622033	401.519	ND	ND	ND
	Offshore Tvärminne	24.5	511.551		Offshore Tvärminne	25.5	782.63	483.538	0.710681	7.57069	0.0509959	412.689	ND	ND	ND
	Offshore Tvärminne	26.5	447.35		Offshore Tvärminne	27.5	ND	512.515	1.7364	9.76939	0.0573118	424.408	ND	ND	ND
	Offshore Tvärminne	28.5	165.513		Offshore Tvärminne	29.5	754.974	404.067	0.557692	11.8856	0.0503774	452.658	ND	ND	ND
	Offshore Tvärminne	30.5	147.928		Offshore Tvärminne	31.5	839.901	282.086	2.79248	14.8832	0.0594671	497.248	ND	ND	ND
	Offshore Tvärminne	32.5	275.13		Offshore Tvärminne	33.5	880.02	229.498	3.92458	17.3303	0.0559811	523.912	ND	ND	ND
	Kristineberg Bay	0	0		Kristineberg Bay	0	40.2795	29804.3	0.314675	0.317394	0.0483359	1.8794	1.51356	16.4871	0.219181
	Kristineberg Bay	1.5	0.207274		Kristineberg Bay	0.5	46.3924	29065.2	0.125096	0.52379	0.0360177	2.2543	1.89195	14.1304	0.219895
	Kristineberg Bay	3.5	0		Kristineberg Bay	2.5	64.7496	29523.2	5.86495	7.09608	0.035711	3.42106	6.30413	12.227	0.267015
	Kristineberg Bay	5.5	0.208902		Kristineberg Bay	4.5	82.7364	30595.5	39.1802	10.3898	0.0384711	11.8821	12.2084	10.9812	0.58472
	Kristineberg Bay	7.5	0.216951		Kristineberg Bay	6.5	147.45	28045	115.937	14.3849	0.0384711	32.7017	75.5353	17.7986	0.906709
	Kristineberg Bay	9.5	0		Kristineberg Bay	8.5	214.283	29325.4	213.287	25.857	0.0544525	82.0509	55.9732	6.33268	0.878151
	Kristineberg Bay	11.5	0.219967		Kristineberg Bay	10.5	299.287	27326.7	147.356	20.6433	0.0383348	76.8365	160.138	13.4293	1.06378
	Kristineberg Bay	13.5	0.215515		Kristineberg Bay	12.5	403.859	26899.9	76.4979	18.0313	0.0460188	99.7918	262.232	12.2927	0.415515
	Kristineberg Bay	15.5	0.220956		Kristineberg Bay	14.5	251.128	28346.9	24.7676	11.8566	0.0356769	61.6874	210.899	7.66919	0.398381
	Kristineberg Bay	17.5	14.2031		Kristineberg Bay	16.5	187.51	29533.6	2.59334	7.8276	0.0358473	33.1678	162.779	8.90502	0.661826
	Kristineberg Bay	19.5	47.0238		Kristineberg Bay	18.5	159.074	29398.3	1.07039	5.763	0.0383518	29.6733	149.5	9.61825	0.448357
	Kristineberg Bay	21.5	50.1351		Kristineberg Bay	20.5	397.091	27024.8	0.483177	5.66819	0.0455588	93.76	429.509	11.4445	0.406948
	Kristineberg Bay	23.5	96.1201		Kristineberg Bay	22.5	446.746	25577.8	0.439842	4.25831	0.0398852	107.555	ND	ND	ND
	Kristineberg Bay	25.5	137.455		Kristineberg Bay	24.5	381.884	26285.7	0.34431	3.02308	0.0525954	91.651	505.687	17.6972	0.294145
	Kristineberg Bay	27.5	64.7567		Kristineberg Bay	26.5	356.44	26493.9	0.509034	2.43451	0.0368866	87.1826	494.763	16.0559	0.43622
	Kristineberg Bay	29.5	247.153		Kristineberg Bay	28.5	241.035	26192	0.569451	2.42781	0.0388459	57.2894	366.253	8.658	0.480484
	Kristineberg Bay	31.5	499.503		Kristineberg Bay	30.5	490.312	23745.6	0.29358	1.30918	0.0444002	133.747	727.295	30.9973	0.344835
	Koljö Fjord	0	56.2816		Kristineberg Bay	32.5	454.291	22538	1.0132	0.849775	0.0376192	126.266	739.075	10.7777	0.217039
	Koljö Fjord	1.5	164.724		Koljö Fjord	0	28.4841	19383.7	0.209079	0.376843	0.0381644	1.22031	7.38575	2.93538	0.131009
	Koljö Fjord	3.5	188.149		Koljö Fjord	0.5	136.412	19935.5	0.276712	0.78705	0.0327464	15.999	71.3944	22.592	0.539742
	Koljö Fjord	5.5	287.925		Koljö Fjord	2.5	258.548	19529.5	0.337756	0.643343	0.0251136	31.1107	135.864	5.46524	0.26059
	Koljö Fjord	7.5	286.039		Koljö Fjord	4.5	262.339	18925.7	0.305793	0.794022	0.0336665	30.0692	133.865	8.13896	0.285578
	Koljö Fjord	9.5	261.874		Koljö Fjord	6.5	362.855	18582.1	0.164061	1.02013	0.0301567	30.8244	154.569	15.1742	0.247025
	Koljö Fjord	11.5	412.671		Koljö Fjord	8.5	319.921	18561.3	0.214504	1.07994	0.0267662	24.4592	139.933	2.8722	0.311994
	Koljö Fjord	13.5	547.179		Koljö Fjord	10.5	404.842	18592.5	0.192694	1.27848	0.0303952	32.7364	179.057	3.12636	0.207758
	Koljö Fjord	17.5	639.629		Koljö Fjord	12.5	533.303	18519.7	0.134408	1.44259	0.0249432	46.5857	252.308	3.5019	0.346263
	Koljö Fjord	19.5	711.631		Koljö Fjord	14.5	561.027	17801.4	0.199534	1.48875	0.0278396	54.1406	306.71	4.4443	0.26059
	Koljö Fjord	21.5	791.598		Koljö Fjord	16.5	532.883	17520.3	0.203259	1.4757	0.0264766	52.5448	314.635	4.3829	0.493335
	Koljö Fjord	23.5	792.618		Koljö Fjord	18.5	555.148	18083.5	0.442027	1.70148	0.0428839	58.5597	355.116	3.40194	0.296287
	Koljö Fjord	27.5	1036.8		Koljö Fjord	20.5	428.236	17926.3	0.171797	1.38802	0.0308212	44.6143	307.424	4.69847	0.656115
					Koljö Fjord	22.5	508.068	17166.4	0.270391	1.46658	0.0277203	55.8629	410.732	2.89433	0.396953
					Koljö Fjord	24.5	538.029	16833.2	0.16809	1.93096	0.0441958	63.0831	ND	ND	ND
					Koljö Fjord	26.5	444.556	17073.7	0.66185	1.68634	0.170343	55.4626	417.158	22.9419	0.261304
					Koljö Fjord	28.5	522.776	16370.6	0.324881	1.72565	0.0347058	65.4958	476.272	17.6051	0.386244
