# Supplementary material for: Evidence for cable bacteria inhabiting deep in anoxic sediment reveals a novel ecological niche
Source: Research Square preprint supplement (doi:10.21203/rs.3.rs-6914568/v1), 2025-07-02
Supplement: Supplementary file 5 [file d4b0cc25dc96054eccec008f.xlsx]

## Sheet: Abundance_bacteria
taxonomy	Krist.1_0_1	Krist.1_1_3	Krist.1_7_9	Krist.1_9_11	Krist.1_20_22	Krist.1_30_32	Krist.2_0_2	Krist.2_2_3	Krist.2_7_9	Krist.2_9_11	Krist.2_20_22	Krist.2_30_32	Krist.3_0_2	Krist.3_2_3	Krist.3_7_9	Krist.3_9_11	Krist.3_20_22	Krist.3_30_32	K_Fjord.1_0_1	K_Fjord.1_1_3	K_Fjord.1_7_9	K_Fjord.1_9_11	K_Fjord.1_20_22	K_Fjord.1_30_32	K_Fjord.2_0_1	K_Fjord.2_1_3	K_Fjord.2_7_9	K_Fjord.2_9_11	K_Fjord.2_20_22	K_Fjord.2_30_32	K_Fjord.3_0_1	K_Fjord.3_1_3	K_Fjord.3_7_9	K_Fjord.3_9_11	K_Fjord.3_20_22	K_Fjord.3_30_32	Offshore_1_0_1	Offshore_1_1_3	Offshore_1_3_5	Offshore_1_5_7	Offshore_1_7_9	Offshore_1_9_11	Offshore_1_11_13	Offshore_1_20_22	Offshore_1_30_31	Offshore_1_40_42	Offshore_2_0_1	Offshore_2_1_3	Offshore_2_3_5
Bacteria_Abditibacteriota_Abditibacteria_Abditibacteriales_Abditibacteriaceae_Abditibacterium	1535	2209	1176	1837	2451	2561	1802	1962	1523	1468	2431	3023	1253	2067	1522	1639	1622	2941	3099	5055	9070	11027	4966	2512	3566	4222	7212	8250	3501	2313	2225	2482	9634	14348	5551	3512	2565	3137	3964	2267	4120	3727	3623	4468	4796	2182	2009	3239	2543
Bacteria_Acidobacteriota_Acidobacteriae_Acidobacteriales_Acidobacteriaceae (Subgroup 1)_Acidicapsa	0	0	0	0	0	0	0	0	0	0	0	0	0	0	0	0	0	0	39	40	70	45	108	0	0	28	96	57	41	0	0	0	127	57	64	0	48	34	44	0	45	47	36	48	71	86	33	21	20
Bacteria_Acidobacteriota_Acidobacteriae_Acidobacteriales_Acidobacteriaceae (Subgroup 1)_Acidipila-Silvibacterium	795	761	533	542	437	234	1142	1065	518	541	445	235	752	792	572	836	423	220	292	361	374	257	235	198	233	251	258	284	164	189	215	172	322	300	135	174	589	1081	1025	493	639	602	481	400	455	394	755	921	810
Bacteria_Acidobacteriota_Acidobacteriae_Acidobacteriales_Acidobacteriaceae (Subgroup 1)_Acidobacterium	27	34	28	31	54	91	0	0	30	43	50	52	0	0	0	61	44	68	30	45	39	59	190	144	34	47	44	53	55	106	0	37	181	76	137	104	36	55	68	24	26	29	31	33	52	33	42	40	23
Bacteria_Acidobacteriota_Acidobacteriae_Acidobacteriales_Acidobacteriaceae (Subgroup 1)_Bryocella	42	0	0	0	0	19	20	0	0	0	0	0	30	0	0	0	35	0	61	39	44	37	53	21	28	20	23	26	22	0	0	0	0	0	27	33	58	146	136	76	101	108	100	101	113	104	142	178	128
Bacteria_Acidobacteriota_Acidobacteriae_Acidobacteriales_Acidobacteriaceae (Subgroup 1)_Edaphobacter	235	409	455	455	491	176	301	349	357	475	321	188	223	337	408	543	287	148	356	387	231	155	118	67	222	242	186	196	148	90	295	226	149	135	70	61	134	257	128	74	72	113	86	68	119	110	187	216	92
Bacteria_Acidobacteriota_Acidobacteriae_Acidobacteriales_Acidobacteriaceae (Subgroup 1)_Granulicella	1118	1329	899	1286	1060	563	861	987	1234	1119	893	610	771	1126	945	1062	1082	663	478	502	779	681	1031	903	510	450	845	685	786	997	380	289	757	809	885	332	213	170	179	68	139	141	116	145	198	155	170	211	110
Bacteria_Acidobacteriota_Acidobacteriae_Acidobacteriales_Acidobacteriaceae (Subgroup 1)_Occallatibacter	368	691	331	499	414	287	519	458	503	435	411	286	373	525	361	562	393	318	209	215	278	357	313	401	236	133	285	215	197	323	193	145	315	357	297	316	221	632	456	212	399	232	158	120	129	131	423	495	594
Bacteria_Acidobacteriota_Acidobacteriae_Acidobacteriales_Acidobacteriaceae (Subgroup 1)_Telmatobacter	164	43	0	0	0	0	82	44	0	0	0	0	128	45	0	0	0	0	0	0	0	0	0	0	0	0	0	0	0	0	0	0	0	0	0	0	0	0	0	0	0	0	0	0	0	0	0	0	0
Bacteria_Acidobacteriota_Acidobacteriae_Acidobacteriales_Acidobacteriaceae (Subgroup 1)_Terracidiphilus	44	150	0	0	0	0	32	44	0	0	0	0	29	65	0	0	0	0	0	0	40	28	0	27	0	0	0	0	0	39	0	0	0	65	0	0	0	0	0	0	0	0	0	0	0	0	0	0	0
Bacteria_Acidobacteriota_Acidobacteriae_Acidobacteriales_Acidobacteriaceae (Subgroup 1)_Terriglobus	0	0	0	0	0	0	0	0	0	0	0	0	0	0	0	62	0	0	0	0	0	0	0	50	31	0	0	0	0	0	0	0	0	0	58	0	0	21	0	0	0	0	25	0	0	0	0	0	0
Bacteria_Acidobacteriota_Acidobacteriae_Acidobacteriales_Acidobacteriaceae (Subgroup 1)_uncultured	678	1267	1130	1222	1080	695	786	1048	1072	995	893	1193	597	1144	999	1175	933	556	540	616	648	597	2164	1239	468	436	594	554	807	1417	406	395	690	623	2016	2005	278	721	680	358	473	506	457	390	546	478	461	635	517
Bacteria_Acidobacteriota_Acidobacteriae_Acidobacteriales_Koribacteraceae_Candidatus Koribacter	197	286	292	201	233	270	198	258	224	335	277	206	133	223	217	463	206	223	118	142	141	147	164	190	121	156	143	81	154	98	212	106	111	170	60	167	59	186	271	111	138	160	113	100	77	81	102	175	206
Bacteria_Acidobacteriota_Acidobacteriae_Acidobacteriales_Koribacteraceae_Paludibaculum	1627	2553	2109	2850	1875	1024	1739	2261	2591	2664	1637	1016	1513	2098	2211	3253	1904	1075	1135	1246	1352	1325	2333	2159	1305	1111	1306	1153	1421	1500	1445	786	1422	1680	2020	1797	2708	13564	14284	6894	11149	13421	14095	16312	9443	4227	6257	10864	8374
Bacteria_Acidobacteriota_Acidobacteriae_Bryobacterales_Bryobacteraceae_Bryobacter	12020	15049	13228	16537	19758	11799	11864	12424	14572	17413	19485	10524	10437	13756	13861	17456	16035	11431	4113	6455	6457	7214	16531	17743	5653	4806	5964	5934	9442	11151	3628	4358	8532	11205	14020	9842	5752	14076	15550	7223	12001	11375	10018	10153	16099	33482	8560	12063	10683
Bacteria_Acidobacteriota_Acidobacteriae_Solibacterales_Solibacteraceae_Candidatus Solibacter	4841	7518	7379	8670	11384	7552	5753	6560	7302	9456	12176	7358	4228	6743	6782	8542	10209	7682	3092	4140	5645	5926	8257	7465	3397	3296	4993	5719	5140	5133	2541	2803	6500	7437	6270	4325	4313	5336	5847	3184	3968	4065	3466	2981	4978	12194	3377	4480	4135
Bacteria_Acidobacteriota_Blastocatellia_Blastocatellales_Blastocatellaceae_Aridibacter	26	29	34	30	52	47	34	43	50	32	43	17	33	36	19	33	36	38	17	35	33	26	0	0	23	16	37	30	0	0	0	28	23	33	0	0	33	44	97	27	18	14	0	0	0	0	35	43	33
Bacteria_Acidobacteriota_Blastocatellia_Blastocatellales_Blastocatellaceae_Blastocatella	2391	2173	694	930	988	698	1696	1509	855	863	1011	654	2075	1658	889	879	952	876	611	519	384	315	265	155	1153	696	390	352	334	162	833	331	258	284	204	98	735	1707	1584	527	801	1047	748	1437	2629	5074	975	1150	685
Bacteria_Acidobacteriota_Blastocatellia_Blastocatellales_Blastocatellaceae_JGI 0001001-H03	330	562	432	471	476	568	392	414	430	359	404	529	333	480	423	507	482	414	347	278	425	341	237	140	307	278	278	318	320	113	434	178	301	430	330	73	940	1324	1321	527	481	344	256	282	231	179	767	1117	549
Bacteria_Acidobacteriota_Blastocatellia_Blastocatellales_Blastocatellaceae_OLB17	0	0	0	20	0	0	18	0	0	0	0	0	0	0	0	18	0	0	0	0	0	0	0	0	0	0	0	0	0	0	0	0	0	0	0	0	0	0	0	0	0	0	0	0	0	0	0	0	0
Bacteria_Acidobacteriota_Blastocatellia_Blastocatellales_Blastocatellaceae_Stenotrophobacter	230	243	193	305	194	216	245	231	262	289	218	144	185	243	227	322	230	163	61	98	129	154	164	161	124	107	102	120	111	98	59	73	112	190	166	72	192	159	109	46	86	57	69	67	60	72	122	101	68
Bacteria_Acidobacteriota_Blastocatellia_Blastocatellales_Blastocatellaceae_Tellurimicrobium	1813	2680	2534	3104	1987	1231	1989	2747	3026	2435	1327	718	1403	2641	2413	2241	1377	1137	875	1496	1313	1522	873	1154	1458	1183	1328	1147	1223	1196	976	875	955	2204	1154	575	554	510	450	303	301	284	236	176	199	151	420	451	413
Bacteria_Acidobacteriota_Blastocatellia_Blastocatellales_Blastocatellaceae_uncultured	718	829	524	613	589	398	811	643	645	656	475	332	653	713	503	630	545	338	4054	7740	3551	3109	519	480	4973	5513	4226	3847	2564	701	3720	5351	3641	1043	273	213	384	680	591	553	528	476	242	270	191	317	385	582	445
Bacteria_Acidobacteriota_Blastocatellia_Chloracidobacteriales_Chloracidobacteriaceae_Chloracidobacterium	149	108	70	104	110	80	57	61	70	113	87	78	96	85	81	79	113	48	48	88	73	76	67	83	59	48	61	53	50	69	48	41	65	130	70	24	31	57	63	50	55	68	68	44	53	43	49	87	55
Bacteria_Acidobacteriota_Blastocatellia_Pyrinomonadales_Pyrinomonadaceae_RB41	9080	11764	7310	9941	9090	4565	8730	9076	9304	10495	6926	4880	7751	9764	8427	12058	8778	4255	6290	7067	5880	6416	11114	6389	5160	5510	5870	6246	6328	5003	4096	4211	8382	6917	9379	7280	2250	4370	3886	2093	3227	2588	2174	1878	2892	2373	3069	3646	3492
Bacteria_Acidobacteriota_Holophagae_Acanthopleuribacterales_Acanthopleuribacteraceae_Acanthopleuribacter	51309	31198	3544	4099	4759	6691	30832	19614	5314	4838	3860	3614	60432	23350	5171	3635	4833	4439	11708	8298	8229	7724	2009	1484	20899	10374	12275	7840	8784	5979	27776	4820	9021	7327	626	537	22125	7425	3609	1410	2637	3817	2703	811	1157	1253	7838	4282	3151
Bacteria_Acidobacteriota_Holophagae_Acanthopleuribacterales_Acanthopleuribacteraceae_Thermotomaculum	343	742	178	222	163	258	509	664	238	129	178	327	352	738	234	170	162	183	2705	1130	1274	1468	471	245	2803	1291	1820	1197	1082	302	6427	566	1315	1181	253	161	2487	996	855	379	308	278	227	183	195	149	933	941	397
Bacteria_Acidobacteriota_Holophagae_Holophagales_Holophagaceae_Geothrix	466	568	585	629	704	265	466	481	521	503	461	210	400	497	541	553	699	335	276	275	196	170	148	96	258	268	222	195	162	99	166	157	202	196	108	42	502	1042	1262	588	841	869	722	825	555	659	552	918	801
Bacteria_Acidobacteriota_Holophagae_Holophagales_Holophagaceae_Holophaga	903	1372	1289	1389	1486	574	1131	1084	1039	866	1242	350	628	1147	1114	971	899	472	183	183	158	111	177	103	168	186	136	113	124	177	168	102	124	157	97	41	288	341	337	565	478	619	1442	1382	1091	850	319	243	285
Bacteria_Acidobacteriota_Holophagae_Holophagales_Holophagaceae_marine group	83	142	89	0	80	181	54	0	62	0	70	289	0	66	115	83	95	119	140	103	0	66	0	0	84	0	0	0	0	0	74	0	0	54	0	0	259	573	438	206	343	348	285	1028	296	346	207	349	195
Bacteria_Acidobacteriota_Holophagae_Holophagales_Holophagaceae_uncultured	1886	2585	2379	2716	1846	946	2256	2629	1931	2016	1279	497	1569	2366	2282	2014	1225	617	812	501	512	411	400	186	711	428	327	334	218	174	636	393	475	406	355	257	7720	7035	8092	6335	9150	13056	21402	37547	16406	17620	5286	6081	6570
Bacteria_Acidobacteriota_Thermoanaerobaculia_Thermoanaerobaculales_Thermoanaerobaculaceae_B276-D12	977	2680	2564	4397	4068	1508	1729	3180	3972	5014	2889	1798	759	2868	4301	4143	3994	1199	1840	3092	2828	2959	4149	1689	3060	2594	2848	3049	2864	1380	736	1795	2924	3179	3215	1266	80	201	192	122	89	38	21	0	0	0	172	180	213
Bacteria_Acidobacteriota_Thermoanaerobaculia_Thermoanaerobaculales_Thermoanaerobaculaceae_Subgroup 10	340982	274185	248722	243712	266502	146886	266442	246334	200569	212957	197637	100307	294892	227556	226835	204218	197864	109164	27905	33842	35727	32874	20135	12368	42844	35838	36144	40458	25813	10533	22120	32314	29003	24022	16090	8767	6713	14677	11384	4969	5090	4774	3738	3531	5138	5450	10064	11689	6453
Bacteria_Acidobacteriota_Thermoanaerobaculia_Thermoanaerobaculales_Thermoanaerobaculaceae_Subgroup 23	134379	160700	192470	190129	378520	215539	138602	161979	172808	181223	346569	145912	102965	139190	172505	147346	281027	200994	144999	194722	181971	146892	46208	24258	147195	177273	175229	186436	102084	28259	108448	151143	141955	119822	29297	13076	32445	132302	117899	65041	55163	49609	39260	15307	16340	11089	71009	109195	67673
Bacteria_Acidobacteriota_Thermoanaerobaculia_Thermoanaerobaculales_Thermoanaerobaculaceae_TPD-58	2603	6313	7132	9802	9085	6304	3908	5026	7320	9917	9390	3992	2291	5476	6620	7479	10177	5643	7122	12341	8180	6685	1412	820	8162	8273	9280	7348	2970	1175	5317	5901	5671	8748	347	319	2530	23586	46032	20083	25713	19126	11739	2952	1702	1022	11202	35432	42094
Bacteria_Acidobacteriota_Thermoanaerobaculia_Thermoanaerobaculales_Thermoanaerobaculaceae_Thermoanaerobaculum	261	306	328	364	537	870	319	289	322	315	500	799	250	300	321	229	316	1043	610	1169	1467	1000	662	888	672	1032	1135	1207	679	482	676	751	512	835	788	388	892	7310	8726	5409	7881	7009	5010	2285	1861	2133	3131	7910	6886
Bacteria_Acidobacteriota_Vicinamibacteria_Vicinamibacterales_Vicinamibacteraceae_Luteitalea	16652	15650	6270	7689	8166	3488	13676	11492	8001	7697	7939	3211	13952	14012	7510	7465	7726	3594	1519	2124	4220	4799	8131	5509	1701	1901	4429	4683	3516	2635	2140	1734	2841	5007	6638	4979	6764	21278	18789	8170	9995	11137	6549	2569	3905	23125	13446	19891	11085
Bacteria_Acidobacteriota_Vicinamibacteria_Vicinamibacterales_Vicinamibacteraceae_Vicinamibacter	576	506	545	1720	139	148	505	447	253	186	123	147	646	402	265	289	197	154	496	614	469	723	320	263	546	362	390	394	358	3930	299	306	984	926	252	94	1165	3589	2831	847	801	727	710	370	720	1051	1787	2192	1590
Bacteria_Acidobacteriota_Vicinamibacteria_Vicinamibacterales_Vicinamibacteraceae_uncultured	1958	2023	538	524	457	536	2051	1227	573	568	399	304	1704	1554	598	759	436	475	1143	726	289	156	211	280	1353	646	188	202	244	379	518	495	0	137	0	0	1349	2323	1786	725	1081	926	1004	792	1176	4705	1877	1466	1475
Bacteria_Actinobacteriota_Acidimicrobiia_Acidimicrobiales_Acidimicrobiaceae_Acidimicrobium	0	30	0	30	0	0	0	32	0	0	0	0	39	0	0	0	0	0	346	127	50	28	0	0	0	44	37	37	0	0	146	123	54	22	34	0	0	20	20	0	11	21	16	13	23	17	12	30	13
Bacteria_Actinobacteriota_Acidimicrobiia_Acidimicrobiales_Acidimicrobiaceae_Acidithrix	160	153	82	52	122	103	117	172	57	53	53	66	146	219	102	51	51	0	0	0	0	0	53	0	0	31	29	52	37	52	103	0	0	35	73	0	22	55	53	44	46	64	82	48	51	45	36	79	33
Bacteria_Actinobacteriota_Acidimicrobiia_Acidimicrobiales_Acidimicrobiaceae_Ferrimicrobium	803	381	709	351	0	805	379	508	312	252	444	689	708	0	589	603	279	474	0	0	0	172	61	0	0	331	0	0	0	0	0	0	0	58	0	0	50	134	220	217	359	332	430	111	172	139	98	314	256
Bacteria_Actinobacteriota_Acidimicrobiia_Acidimicrobiales_Acidimicrobiaceae_Ferrithrix	103	210	389	238	485	95	120	166	208	281	145	140	109	289	374	193	343	95	0	103	0	0	0	36	0	49	0	0	0	59	0	0	0	0	45	0	13	52	45	14	16	41	27	21	0	18	0	44	19
Bacteria_Actinobacteriota_Acidimicrobiia_Acidimicrobiales_Acidimicrobiaceae_uncultured	196	213	210	153	353	387	152	226	100	117	159	474	148	347	123	122	194	150	0	162	282	180	146	36	462	158	273	391	157	62	0	405	296	124	85	0	23	71	78	18	37	38	21	37	41	40	36	86	38
Bacteria_Actinobacteriota_Acidimicrobiia_Acidimicrobiales_Acidimicrobiales Incertae Sedis_Aciditerrimonas	23	41	62	171	353	252	34	54	135	202	418	587	28	47	154	135	95	312	0	61	209	241	1662	262	39	74	120	173	445	2736	0	34	189	145	1161	659	14	14	0	15	20	14	18	0	0	0	0	0	13
Bacteria_Actinobacteriota_Acidimicrobiia_Actinomarinales_Actinomarinaceae_Candidatus Actinomarina	2085	1576	1085	985	1069	831	1494	1369	974	862	835	987	1760	1403	970	1316	903	788	3627	1203	1460	1095	722	325	4303	1410	705	718	520	257	6808	861	805	522	343	262	321	752	743	503	759	950	803	700	1004	836	462	855	525
Bacteria_Actinobacteriota_Acidimicrobiia_Microtrichales_Iamiaceae_Iamia	7237	6162	8694	4552	5881	8200	4661	6867	3351	3454	3929	7231	6850	4930	7712	4222	4189	4403	4364	3524	2329	2165	4574	5030	4483	3946	1722	2283	4151	2126	3684	4599	2018	1213	5056	2255	2332	7104	7769	4989	5904	7790	7342	4599	8591	10831	4052	9271	5034
Bacteria_Actinobacteriota_Acidimicrobiia_Microtrichales_Ilumatobacteraceae_CL500-29 marine group	2215	1996	1824	1724	1201	928	1863	1904	1950	1523	627	615	2257	1727	1756	1849	1352	533	1086	845	604	548	1046	1076	1257	1012	504	534	514	459	953	1333	531	368	1926	841	5701	5084	3921	2102	2345	2379	2080	1215	1398	764	3562	5316	2723
Bacteria_Actinobacteriota_Acidimicrobiia_Microtrichales_Ilumatobacteraceae_Ilumatobacter	76915	59652	56746	38902	10622	5520	54167	60438	27226	20475	5113	4301	79934	52737	43874	30590	8392	4340	111249	90872	47429	36399	7052	2939	123288	106717	32073	32866	28845	4276	88499	148537	25533	4205	963	1086	84762	313092	321222	251001	274985	352843	311008	141676	140345	70313	188913	468150	240961
Bacteria_Actinobacteriota_Acidimicrobiia_Microtrichales_Ilumatobacteraceae_uncultured	12667	9100	6935	5759	3719	2925	8136	7819	4911	3981	3055	1844	10956	7007	6302	5388	2571	2542	4133	2504	2420	1730	2369	1292	5030	2634	1112	1102	1233	1475	5879	2773	957	799	1439	874	3304	8331	8173	5039	5561	6701	6603	3936	3879	2699	5522	9926	5810
Bacteria_Actinobacteriota_Acidimicrobiia_Microtrichales_Microtrichaceae_Candidatus Microthrix	1160	1009	1364	801	1517	1915	616	985	642	669	1088	1855	935	742	1318	764	963	934	612	696	317	394	0	67	613	812	233	392	266	0	378	834	319	85	0	0	142	527	493	414	418	720	620	160	176	197	281	698	414
Bacteria_Actinobacteriota_Acidimicrobiia_Microtrichales_Microtrichaceae_IMCC26207	11632	10006	16252	9781	8776	8042	7520	10147	5912	6549	5858	6106	12468	8229	13335	10017	5982	4829	12089	10855	7078	4845	1525	343	15385	15925	4785	6674	3826	1003	8772	19194	4405	1254	643	529	6352	24577	20801	19239	24656	33723	38897	22826	20833	8374	14104	32669	16085
Bacteria_Actinobacteriota_Acidimicrobiia_Microtrichales_Microtrichaceae_Sva0996 marine group	65483	47994	47526	30993	29739	27681	39164	48377	22749	23421	23733	25657	60178	38694	41812	27553	22694	18900	20371	16840	11376	9007	1794	988	28165	21846	7315	8961	5911	1158	19989	25039	5745	4678	822	603	3583	9483	8795	5870	7141	9080	7889	4315	6533	9514	5937	12521	5976
Bacteria_Actinobacteriota_Acidimicrobiia_Microtrichales_Microtrichaceae_uncultured	28925	20100	19133	10954	11082	12008	15599	22698	8627	8023	6780	9486	26326	15842	18708	10403	10426	6858	14738	10817	5617	4534	1168	563	16669	12178	3102	3913	3857	567	12839	19942	2729	914	507	617	5465	17071	14632	8583	11616	15458	15274	7491	5564	4662	9401	19182	9831
Bacteria_Actinobacteriota_Actinobacteria_Actinomycetales_Actinomycetaceae_Actinomyces	1121	1567	1477	1891	1469	994	1140	1263	1298	1332	1085	921	881	1331	1549	1710	1156	969	2283	1450	1133	1239	1747	1822	2168	1532	1106	1066	1292	1173	2440	1177	1096	1277	1232	822	874	1964	2127	1370	1587	1616	1482	1421	1053	745	1355	2104	1598
Bacteria_Actinobacteriota_Actinobacteria_Actinomycetales_Actinomycetaceae_Actinotignum	0	0	0	0	0	0	0	0	0	0	0	0	0	0	0	0	0	0	0	0	0	0	0	0	0	0	0	0	0	0	0	0	0	0	0	0	0	0	12	0	12	26	25	0	0	0	0	14	0
Bacteria_Actinobacteriota_Actinobacteria_Actinomycetales_Actinomycetaceae_Arcanobacterium	26	26	39	18	44	47	23	32	22	28	24	22	39	23	18	28	34	28	29	28	23	33	0	0	47	32	25	0	24	0	71	0	0	0	0	30	19	44	30	15	16	21	15	0	0	0	33	38	14
Bacteria_Actinobacteriota_Actinobacteria_Actinomycetales_Actinomycetaceae_F0332	18	16	28	24	45	40	21	16	44	32	42	53	16	25	32	36	19	20	26	27	41	37	62	114	20	32	24	26	48	142	21	18	59	26	46	89	12	18	19	16	22	26	20	20	18	0	20	25	15
Bacteria_Actinobacteriota_Actinobacteria_Actinomycetales_Actinomycetaceae_Flaviflexus	0	32	42	55	55	24	35	29	42	65	80	41	21	29	37	58	109	29	319	540	703	741	257	57	247	450	581	648	182	102	198	382	344	350	132	0	15	44	34	16	19	43	41	103	133	22	29	38	21
Bacteria_Actinobacteriota_Actinobacteria_Actinomycetales_Actinomycetaceae_Mobiluncus	0	0	0	0	0	0	0	0	0	0	0	0	0	0	0	0	0	0	0	0	0	0	0	0	0	0	0	0	0	0	0	0	0	0	0	0	0	0	0	0	0	0	16	0	0	0	0	0	0
Bacteria_Actinobacteriota_Actinobacteria_Actinomycetales_Actinomycetaceae_Trueperella	0	0	0	0	0	0	0	0	0	0	0	0	0	0	0	0	0	0	0	0	0	0	0	0	0	0	0	0	0	0	0	0	0	0	0	0	38	30	34	19	0	0	0	19	20	17	20	30	14
Bacteria_Actinobacteriota_Actinobacteria_Actinomycetales_Actinomycetaceae_Varibaculum	23	65	26	50	27	30	28	36	80	36	89	30	0	79	55	67	43	43	23	68	151	161	156	81	20	47	194	126	83	15	16	35	149	196	187	41	0	65	235	99	95	56	28	0	0	0	17	86	52
Bacteria_Actinobacteriota_Actinobacteria_Actinomycetales_Actinomycetaceae_uncultured	18	0	0	0	0	0	0	0	0	0	0	0	0	0	0	0	0	0	0	0	0	0	0	0	0	0	0	0	0	0	0	0	0	0	0	0	0	0	0	0	0	0	0	0	0	0	0	0	0
Bacteria_Actinobacteriota_Actinobacteria_Actinomycetales_Actinomycetales Incertae Sedis_Candidatus Ancillula	883	1026	1083	741	1532	4627	826	1109	617	694	1972	4869	742	843	1001	720	1314	2679	356	546	2178	2403	8371	1990	623	826	2368	3278	4663	1141	332	646	1475	1827	6643	1386	100	302	252	150	154	188	136	149	55	37	136	289	216
Bacteria_Actinobacteriota_Actinobacteria_Bifidobacteriales_Bifidobacteriaceae_Aeriscardovia	0	0	0	0	21	0	0	17	0	0	0	29	0	0	0	0	20	0	0	0	0	0	0	0	0	0	0	0	0	0	0	0	0	0	0	0	0	21	18	13	0	18	16	12	13	11	14	27	0
Bacteria_Actinobacteriota_Actinobacteria_Bifidobacteriales_Bifidobacteriaceae_Alloscardovia	0	0	0	0	0	0	0	0	0	0	0	0	0	0	0	26	0	0	0	0	0	0	0	0	0	0	0	0	0	0	0	0	0	0	0	0	0	12	0	0	0	0	0	0	16	28	0	0	0
Bacteria_Actinobacteriota_Actinobacteria_Bifidobacteriales_Bifidobacteriaceae_Bifidobacterium	988	2460	512	550	342	323	1123	1306	766	484	361	304	637	1571	575	541	334	307	560	437	443	478	423	384	723	402	385	357	390	407	2018	264	476	402	471	521	372	572	562	348	517	492	521	485	518	387	400	521	443
Bacteria_Actinobacteriota_Actinobacteria_Bifidobacteriales_Bifidobacteriaceae_Bombiscardovia	1611	912	81	113	0	0	1081	586	108	58	0	0	1392	615	158	98	0	0	54	24	22	23	0	0	95	41	27	0	0	0	87	33	27	0	0	0	54	27	10	0	0	0	0	0	0	0	36	13	0
Bacteria_Actinobacteriota_Actinobacteria_Bifidobacteriales_Bifidobacteriaceae_Gardnerella	0	0	0	0	0	0	0	0	0	0	0	0	0	0	0	0	0	0	290	63	89	38	0	23	165	65	0	0	0	0	203	56	0	0	0	0	36	0	13	0	28	26	0	0	0	0	18	20	0
Bacteria_Actinobacteriota_Actinobacteria_Bifidobacteriales_Bifidobacteriaceae_Neoscardovia	0	0	0	0	0	0	0	0	0	0	0	0	0	0	0	0	0	0	0	0	0	0	0	0	0	0	0	0	0	0	0	0	0	0	0	0	0	0	11	0	0	0	0	0	0	0	0	0	0
Bacteria_Actinobacteriota_Actinobacteria_Bifidobacteriales_Bifidobacteriaceae_Parascardovia	0	0	0	0	0	0	0	0	0	0	0	0	0	0	0	0	0	0	0	0	0	0	0	0	0	0	0	0	0	0	0	0	0	0	0	0	0	0	0	0	27	53	38	32	20	17	0	0	0
Bacteria_Actinobacteriota_Actinobacteria_Bifidobacteriales_Bifidobacteriaceae_Scardovia	0	0	0	0	0	19	0	0	0	0	0	21	0	0	0	0	0	16	0	0	0	0	0	0	0	0	0	0	0	0	0	0	0	0	0	0	0	0	0	0	0	0	0	0	0	0	0	0	0
Bacteria_Actinobacteriota_Actinobacteria_Catenulisporales_Actinospicaceae_Actinospica	0	0	0	0	0	0	0	20	0	0	0	0	0	0	0	0	0	0	0	19	0	0	0	0	0	22	0	0	0	0	0	45	0	0	0	0	0	47	21	23	23	63	21	32	25	14	34	65	29
Bacteria_Actinobacteriota_Actinobacteria_Catenulisporales_Catenulisporaceae_Catenulispora	31	0	0	0	0	0	0	0	0	0	0	0	24	0	0	0	0	0	0	0	0	0	0	0	32	33	0	0	0	0	51	63	0	0	0	0	23	120	130	93	99	165	136	186	303	522	81	139	76
Bacteria_Actinobacteriota_Actinobacteria_Corynebacteriales_Corynebacteriaceae_Corynebacterium	3557	5102	3560	4247	4401	4275	3805	4551	4113	3724	4050	4866	3172	4274	3884	4783	3942	4010	4009	4422	5088	4952	7596	7249	4215	3728	4609	5020	4807	6466	4033	3291	5388	5725	11109	9802	6365	9132	8030	5168	6312	7974	6747	7307	6287	4191	6373	10154	5704
Bacteria_Actinobacteriota_Actinobacteria_Corynebacteriales_Corynebacteriaceae_Lawsonella	410	655	730	617	500	519	438	612	761	573	521	472	386	606	644	523	490	365	398	646	534	527	1192	693	550	522	502	530	665	856	317	383	324	544	892	652	890	1342	1442	760	779	823	722	485	681	491	1060	1810	844
Bacteria_Actinobacteriota_Actinobacteria_Corynebacteriales_Corynebacteriaceae_Turicella	0	0	0	0	18	0	0	0	0	0	0	0	0	0	0	0	0	0	0	0	40	36	86	273	20	37	0	27	85	413	17	0	25	20	81	135	11	0	0	0	0	0	0	0	0	0	0	0	0
Bacteria_Actinobacteriota_Actinobacteria_Corynebacteriales_Corynebacteriaceae_uncultured	0	0	0	0	0	0	0	0	0	0	0	0	0	0	0	0	0	0	0	0	0	0	0	0	0	0	0	0	0	0	0	0	0	0	76	0	0	0	0	0	0	0	0	0	0	0	0	0	0
Bacteria_Actinobacteriota_Actinobacteria_Corynebacteriales_Corynebacteriales Incertae Sedis_Tomitella	21	23	0	0	0	0	0	0	0	0	0	0	19	0	0	0	0	0	0	0	0	0	0	0	0	0	0	0	0	0	0	0	0	0	0	0	0	25	0	0	0	43	21	16	0	0	19	15	0
Bacteria_Actinobacteriota_Actinobacteria_Corynebacteriales_Dietziaceae_Dietzia	90	119	104	79	306	190	106	103	128	196	285	158	83	92	101	142	323	185	98	123	187	150	95	84	153	109	184	175	135	64	91	115	97	150	147	66	818	1727	1221	369	275	254	260	171	168	111	1057	1184	643
Bacteria_Actinobacteriota_Actinobacteria_Corynebacteriales_Mycobacteriaceae_Mycobacterium	2462	2232	2012	1665	1587	1212	2173	2125	1957	1386	1368	1346	2364	2750	1706	1995	1160	1198	3801	4157	4347	3953	1804	1259	3331	3457	3151	3463	1972	1069	2694	2805	4730	4500	1403	786	10864	16777	18131	7154	12519	13236	16563	10563	25888	7103	9546	16100	9843
Bacteria_Actinobacteriota_Actinobacteria_Corynebacteriales_Nocardiaceae_Gordonia	190	390	138	203	175	93	229	400	293	157	103	62	127	351	181	200	111	85	497	319	222	180	229	84	372	302	195	171	121	124	688	252	167	156	305	132	261	646	530	334	335	369	446	304	283	166	348	699	327
Bacteria_Actinobacteriota_Actinobacteria_Corynebacteriales_Nocardiaceae_Nocardia	956	1150	1563	1426	1419	1109	980	1331	1332	1202	1129	850	1128	1210	1239	1287	2072	1016	678	701	675	621	916	822	789	580	604	665	889	931	587	717	580	673	804	497	925	5421	3969	2700	1730	2235	1562	849	703	428	2296	7173	2774
Bacteria_Actinobacteriota_Actinobacteria_Corynebacteriales_Nocardiaceae_Rhodococcus	993	1087	679	764	851	698	1004	930	643	818	711	977	950	1054	678	1118	633	552	758	1051	953	1002	1628	1358	909	921	803	1043	1033	1082	718	845	671	945	1410	665	1282	4104	3514	2408	1975	2637	2077	1328	1548	974	2266	4987	2393
Bacteria_Actinobacteriota_Actinobacteria_Corynebacteriales_Nocardiaceae_Smaragdicoccus	0	0	0	0	0	0	0	0	0	0	0	0	0	0	0	0	0	0	0	0	0	0	0	0	0	0	0	0	0	0	0	0	0	0	0	0	0	48	59	41	41	93	62	45	63	33	24	70	38
Bacteria_Actinobacteriota_Actinobacteria_Corynebacteriales_Nocardiaceae_Williamsia	56	89	25	53	89	76	69	49	0	0	97	109	48	56	35	0	45	63	37	0	35	0	37	0	0	32	0	0	0	0	41	0	0	34	0	0	61	116	130	56	84	102	74	38	65	38	78	113	99
Bacteria_Actinobacteriota_Actinobacteria_Corynebacteriales_Segniliparaceae_uncultured	0	0	0	0	0	0	0	0	20	0	0	0	0	0	0	0	0	0	0	0	0	0	0	0	0	0	0	0	0	0	0	0	0	0	0	0	23	52	38	32	36	27	19	83	25	0	24	35	21
Bacteria_Actinobacteriota_Actinobacteria_Corynebacteriales_Tsukamurellaceae_Tsukamurella	27	27	29	28	0	30	0	27	29	38	36	0	0	27	0	52	0	0	0	0	0	36	0	0	33	32	38	0	39	0	0	0	0	0	42	0	26	43	34	27	0	22	0	17	24	0	0	0	0
Bacteria_Actinobacteriota_Actinobacteria_Euzebyales_Euzebyaceae_Egibacter	31	0	0	0	17	21	0	0	0	0	0	0	0	0	0	0	28	26	33	46	75	96	56	25	28	60	75	78	70	0	38	40	92	76	45	17	0	20	52	30	66	68	66	68	194	190	16	41	35
Bacteria_Actinobacteriota_Actinobacteria_Euzebyales_Euzebyaceae_Euzebya	838	727	623	617	80	28	724	477	596	426	44	88	579	649	614	828	64	51	45	26	0	0	0	0	51	30	0	22	0	0	60	32	17	0	0	0	0	50	44	31	45	40	42	16	13	0	30	88	26
Bacteria_Actinobacteriota_Actinobacteria_Euzebyales_Euzebyaceae_uncultured	659	852	945	906	1257	925	511	753	932	839	1092	592	503	595	804	911	851	814	327	308	339	340	412	721	362	298	245	297	317	338	215	279	523	391	355	407	191	336	352	189	280	307	246	165	205	147	284	396	247
Bacteria_Actinobacteriota_Actinobacteria_Frankiales_Acidothermaceae_Acidothermus	278	362	295	252	233	203	233	353	245	264	235	240	342	314	250	249	190	152	354	357	280	245	262	156	538	423	232	239	173	135	498	524	162	233	216	67	1252	2673	1877	1667	2511	4148	3496	1416	846	527	1529	3443	1430
Bacteria_Actinobacteriota_Actinobacteria_Frankiales_Cryptosporangiaceae_Cryptosporangium	307	737	24	0	0	0	396	515	64	38	0	0	274	439	45	0	0	27	163	162	288	441	1023	493	172	129	175	286	347	850	207	144	179	426	784	716	114	193	136	164	1426	1099	1172	396	873	1123	103	246	204
Bacteria_Actinobacteriota_Actinobacteria_Frankiales_Cryptosporangiaceae_Fodinicola	0	0	0	0	0	0	0	0	0	0	0	0	0	0	0	0	0	0	0	0	37	0	82	0	0	0	0	0	41	0	0	0	0	0	0	0	0	0	0	0	0	0	0	0	0	0	0	0	0
Bacteria_Actinobacteriota_Actinobacteria_Frankiales_Frankiaceae_Frankia	273	142	121	171	129	75	149	114	234	264	165	144	196	131	163	355	103	76	370	313	215	142	67	84	515	438	285	189	151	74	360	331	155	57	93	0	697	3478	4278	5471	5734	7367	6917	5331	5267	2722	2054	8498	4198
Bacteria_Actinobacteriota_Actinobacteria_Frankiales_Frankiaceae_Jatrophihabitans	377	379	488	239	280	242	354	419	220	220	184	222	414	343	388	232	224	147	150	199	96	109	64	41	231	222	97	86	79	0	175	224	158	82	34	43	1883	9512	9643	7181	6804	10014	7756	4679	5697	3074	5070	14866	6972
Bacteria_Actinobacteriota_Actinobacteria_Frankiales_Geodermatophilaceae_Antricoccus	190	119	141	87	108	305	98	184	42	64	133	231	151	118	151	131	99	97	35	0	25	0	0	0	25	37	0	34	0	0	0	37	0	0	0	0	325	874	642	497	1066	1161	897	460	486	242	489	1041	661
Bacteria_Actinobacteriota_Actinobacteria_Frankiales_Geodermatophilaceae_Blastococcus	234	234	244	274	152	166	179	221	237	231	110	205	155	228	203	275	141	94	156	189	168	124	179	198	167	105	113	115	168	112	137	168	125	154	225	96	506	1753	1660	1430	1136	1266	1358	1175	1443	735	1134	2577	1348
Bacteria_Actinobacteriota_Actinobacteria_Frankiales_Geodermatophilaceae_Geodermatophilus	142	161	192	153	135	86	95	156	106	115	71	75	122	90	135	164	110	78	83	68	87	85	98	77	72	41	84	52	82	69	81	109	58	78	58	0	273	1167	993	869	834	1388	1160	981	842	511	639	1674	903
Bacteria_Actinobacteriota_Actinobacteria_Frankiales_Geodermatophilaceae_Klenkia	0	0	0	0	0	0	0	0	0	0	0	0	0	0	0	0	0	0	0	0	0	0	0	0	0	0	0	0	0	0	0	0	0	0	0	0	42	94	101	51	75	91	117	79	78	36	68	214	104
Bacteria_Actinobacteriota_Actinobacteria_Frankiales_Geodermatophilaceae_Modestobacter	224	238	267	290	187	146	196	228	199	208	126	99	205	239	230	216	97	91	246	224	172	126	118	51	273	394	124	149	114	37	230	445	99	102	0	0	1056	5113	4694	3282	3141	4311	4223	3699	4512	3556	2377	6529	3553
Bacteria_Actinobacteriota_Actinobacteria_Frankiales_Nakamurellaceae_Nakamurella	132	87	146	182	96	69	66	81	109	138	117	78	125	101	116	132	121	110	101	96	116	93	256	76	194	129	88	97	204	52	238	141	135	139	80	116	695	2331	2267	1537	1479	1977	1673	769	825	630	1360	3581	1684
Bacteria_Actinobacteriota_Actinobacteria_Frankiales_Sporichthyaceae_Candidatus Planktophila	163	265	262	266	184	0	166	217	195	202	0	0	84	276	184	82	176	0	1124	1409	779	490	48	58	744	1011	573	463	185	36	750	1049	548	511	0	0	93	540	631	395	330	467	394	131	197	153	246	546	399
Bacteria_Actinobacteriota_Actinobacteria_Frankiales_Sporichthyaceae_Longivirga	389	313	95	147	154	225	254	311	118	108	222	140	357	263	173	158	149	166	139	194	103	231	218	133	278	131	155	222	345	132	111	182	87	269	353	41	2927	15134	12486	8447	6944	10244	9615	8040	10905	5374	8247	19544	8693
Bacteria_Actinobacteriota_Actinobacteria_Frankiales_Sporichthyaceae_Sporichthya	40	26	0	0	0	0	0	0	0	0	0	0	36	0	0	0	0	0	27	0	0	0	0	0	25	29	0	0	0	0	0	43	0	0	0	0	1521	8126	8837	6987	6381	10149	8314	5331	6031	3517	4664	13103	5993
Bacteria_Actinobacteriota_Actinobacteria_Frankiales_Sporichthyaceae_hgcI clade	2113	2091	1169	1437	1075	538	2035	1677	1497	1577	888	616	1868	1874	1305	1263	861	542	576	855	1237	1401	1231	852	627	755	1271	1016	1010	719	510	586	1953	2239	1160	673	3722	3014	2741	1554	2224	2478	1757	1469	1241	795	2455	3850	1872
Bacteria_Actinobacteriota_Actinobacteria_Frankiales_Sporichthyaceae_uncultured	998	826	402	351	525	965	907	714	328	240	461	722	891	702	566	317	594	696	96	140	238	223	106	59	142	158	225	268	201	0	90	136	214	341	128	0	140	883	528	661	635	740	691	648	524	254	405	1310	594
Bacteria_Actinobacteriota_Actinobacteria_Glycomycetales_Glycomycetaceae_Glycomyces	28	50	36	56	33	0	36	34	43	26	23	0	39	37	28	50	44	0	86	151	42	57	24	49	178	97	46	32	55	50	145	149	24	44	27	0	0	32	46	32	44	33	43	19	25	38	28	47	30
Bacteria_Actinobacteriota_Actinobacteria_Glycomycetales_Glycomycetaceae_Salininema	0	0	0	0	0	0	0	0	0	0	0	0	0	0	0	0	0	0	0	0	0	0	0	0	0	0	0	0	0	0	0	0	0	0	0	0	0	0	11	0	0	13	0	0	0	0	0	0	0
Bacteria_Actinobacteriota_Actinobacteria_Glycomycetales_Glycomycetaceae_uncultured	0	0	0	0	0	0	0	0	0	0	0	0	0	0	0	0	0	0	0	0	0	0	0	0	0	0	0	0	0	0	0	0	19	0	0	23	17	0	0	0	0	0	0	0	0	0	0	0	0
Bacteria_Actinobacteriota_Actinobacteria_Kineosporiales_Kineosporiaceae_Angustibacter	0	27	0	32	0	0	0	24	0	0	0	0	0	30	0	0	0	0	0	0	0	0	0	0	0	0	0	0	0	0	0	0	0	0	0	0	0	36	25	0	0	33	0	58	26	0	0	54	38
Bacteria_Actinobacteriota_Actinobacteria_Kineosporiales_Kineosporiaceae_Kineococcus	460	519	595	624	679	394	429	383	492	588	353	348	437	501	505	611	246	401	51	58	55	39	70	51	48	36	55	28	30	0	40	36	48	56	32	0	98	233	152	91	73	81	94	93	84	94	67	209	106
Bacteria_Actinobacteriota_Actinobacteria_Kineosporiales_Kineosporiaceae_Kineosporia	0	0	28	0	0	0	35	0	0	0	0	0	0	28	0	0	0	0	68	53	37	0	0	0	39	79	34	0	0	0	81	33	47	0	58	0	49	105	89	67	68	64	67	32	28	0	91	98	48
Bacteria_Actinobacteriota_Actinobacteria_Kineosporiales_Kineosporiaceae_Quadrisphaera	192	202	271	162	188	180	142	221	128	99	73	120	269	190	196	85	128	78	118	293	287	326	0	0	216	295	241	123	64	0	148	228	131	182	0	0	68	149	163	141	168	185	249	126	206	128	99	216	119
Bacteria_Actinobacteriota_Actinobacteria_Kineosporiales_Kineosporiaceae_uncultured	0	0	0	0	0	0	0	0	0	0	0	0	0	0	0	0	0	0	0	0	0	0	0	0	0	0	0	0	0	0	0	0	0	0	0	0	0	0	0	0	0	56	0	0	0	0	0	0	0
Bacteria_Actinobacteriota_Actinobacteria_Micrococcales_Beutenbergiaceae_Serinibacter	0	0	0	0	0	0	0	0	0	0	0	0	0	0	0	0	0	0	0	0	0	0	0	0	0	0	0	0	0	0	0	0	0	0	0	0	0	0	0	0	0	0	0	48	0	0	0	0	0
Bacteria_Actinobacteriota_Actinobacteria_Micrococcales_Bogoriellaceae_Bogoriella	0	0	0	0	0	0	0	0	0	0	0	0	0	0	0	0	0	0	0	0	0	0	0	0	0	0	0	0	0	0	0	0	0	0	0	0	0	20	33	0	0	29	25	0	0	0	18	52	19
Bacteria_Actinobacteriota_Actinobacteria_Micrococcales_Bogoriellaceae_Georgenia	23	30	0	0	26	0	0	0	0	0	29	44	25	25	0	23	28	23	0	0	49	35	62	29	28	0	70	44	43	25	28	28	50	50	0	0	0	20	26	0	18	25	42	398	340	36	19	36	0
Bacteria_Actinobacteriota_Actinobacteria_Micrococcales_Brevibacteriaceae_Brevibacterium	175	239	216	204	169	246	162	218	212	156	172	326	163	220	225	301	115	185	215	209	171	181	273	214	300	243	183	210	193	209	149	207	183	138	98	111	414	843	1049	597	695	627	806	752	602	316	451	1060	803
Bacteria_Actinobacteriota_Actinobacteria_Micrococcales_Brevibacteriaceae_Sediminivirga	0	0	0	0	0	0	0	0	0	0	0	0	0	0	0	0	0	0	0	0	0	0	0	0	0	0	0	0	0	0	0	0	0	0	0	0	0	23	15	16	19	20	16	45	25	27	0	0	14
Bacteria_Actinobacteriota_Actinobacteria_Micrococcales_Cellulomonadaceae_Actinotalea	40	0	47	0	57	0	0	40	0	58	0	0	49	47	0	82	41	64	0	93	83	56	0	0	55	78	53	0	0	54	56	92	56	87	0	0	94	241	241	474	677	1199	4003	233510	38733	8599	114	303	200
Bacteria_Actinobacteriota_Actinobacteria_Micrococcales_Cellulomonadaceae_Cellulomonas	199	228	224	159	243	153	177	190	173	154	194	209	221	202	187	398	110	108	101	157	193	157	118	80	187	140	141	165	147	82	196	166	167	154	115	130	417	1275	997	666	840	1071	990	1782	1351	1091	773	1738	722
Bacteria_Actinobacteriota_Actinobacteria_Micrococcales_Cellulomonadaceae_Oerskovia	0	0	0	0	0	0	0	0	0	0	0	0	0	0	0	0	0	0	0	0	0	0	0	0	0	0	0	0	0	0	0	0	0	0	0	0	0	0	45	0	0	0	0	287	99	0	0	93	0
Bacteria_Actinobacteriota_Actinobacteria_Micrococcales_Cellulomonadaceae_Paraoerskovia	62	87	43	65	0	50	121	120	48	0	0	0	65	95	49	0	0	0	0	58	48	0	115	80	0	62	0	0	0	0	0	0	0	56	68	0	0	59	70	46	44	72	96	95	91	0	0	100	36
Bacteria_Actinobacteriota_Actinobacteria_Micrococcales_Cellulomonadaceae_Pseudactinotalea	28	52	54	91	33	0	0	37	34	0	0	0	0	47	84	86	32	0	1147	1296	275	242	445	435	668	460	171	144	228	211	1100	1062	175	90	435	156	271	324	255	226	289	268	260	4938	77	45	234	345	139
Bacteria_Actinobacteriota_Actinobacteria_Micrococcales_Cellulomonadaceae_Tropheryma	33	56	75	103	603	641	40	56	113	220	1481	404	40	71	118	149	324	306	18	64	276	510	1264	1025	65	101	620	559	567	1144	17	26	385	511	1108	992	0	22	35	0	69	55	49	17	0	15	0	15	28
Bacteria_Actinobacteriota_Actinobacteria_Micrococcales_Demequinaceae_Demequina	487	454	82	85	91	184	390	302	89	56	93	266	562	392	118	164	34	217	170	199	166	293	109	32	136	162	187	152	58	0	166	190	131	284	106	439	58	442	909	523	575	844	1085	2545	2660	562	182	613	618
Bacteria_Actinobacteriota_Actinobacteria_Micrococcales_Demequinaceae_Lysinimicrobium	0	0	0	0	0	0	0	0	0	0	0	0	0	0	0	0	0	0	0	0	0	0	0	0	0	0	0	0	0	0	0	0	0	0	0	0	64	352	420	504	387	506	354	384	661	440	230	804	427
Bacteria_Actinobacteriota_Actinobacteria_Micrococcales_Demequinaceae_uncultured	21	156	0	0	0	0	44	80	19	0	0	0	0	102	24	0	0	0	0	0	0	0	0	0	0	0	0	0	0	0	0	0	0	0	0	0	39	18	21	15	0	13	14	12	0	0	18	28	16
Bacteria_Actinobacteriota_Actinobacteria_Micrococcales_Dermabacteraceae_Brachybacterium	133	244	290	287	199	164	156	145	185	165	136	151	143	199	488	309	125	170	212	159	131	160	300	79	210	112	156	111	87	78	193	103	203	328	94	78	445	975	875	589	462	766	610	779	494	285	573	1017	650
Bacteria_Actinobacteriota_Actinobacteria_Micrococcales_Dermabacteraceae_Dermabacter	343	213	101	64	79	100	271	191	72	80	141	222	314	222	88	96	41	88	132	119	185	90	205	114	100	90	93	126	104	153	82	97	258	51	116	151	80	110	153	109	68	105	83	96	48	57	89	169	101
Bacteria_Actinobacteriota_Actinobacteria_Micrococcales_Dermabacteraceae_Helcobacillus	0	0	0	0	0	0	0	0	0	0	0	0	0	0	0	0	0	0	0	0	0	0	0	0	0	0	0	0	0	0	0	0	0	0	0	0	0	0	15	0	0	0	0	0	0	0	0	0	0
Bacteria_Actinobacteriota_Actinobacteria_Micrococcales_Dermacoccaceae_Allobranchiibius	0	36	23	0	0	0	0	0	0	0	0	0	0	23	0	0	0	0	0	0	0	0	0	0	0	0	0	0	0	0	0	0	0	0	0	0	0	0	0	0	0	0	0	0	0	0	0	0	0
Bacteria_Actinobacteriota_Actinobacteria_Micrococcales_Dermacoccaceae_Barrientosiimonas	0	0	0	0	0	0	0	0	0	0	0	0	0	0	0	0	0	0	0	0	0	0	0	0	0	0	0	0	0	0	0	0	0	0	0	0	0	0	0	0	0	0	0	0	0	0	0	53	0
Bacteria_Actinobacteriota_Actinobacteria_Micrococcales_Dermacoccaceae_Dermacoccus	79	282	123	116	145	208	167	234	109	109	101	108	63	201	140	104	189	155	35	47	45	83	148	44	51	82	58	75	81	35	50	35	59	66	42	93	96	171	141	105	72	81	63	139	75	53	127	239	70
Bacteria_Actinobacteriota_Actinobacteria_Micrococcales_Dermacoccaceae_Flexivirga	0	0	0	0	0	0	0	0	0	0	0	0	0	0	0	0	0	0	30	47	0	0	0	0	68	28	0	0	0	0	0	0	0	0	0	0	0	0	0	0	0	0	0	0	0	0	0	0	0
Bacteria_Actinobacteriota_Actinobacteria_Micrococcales_Dermacoccaceae_Luteipulveratus	0	0	0	0	37	0	0	0	0	0	0	43	0	0	0	0	0	0	0	0	0	0	0	0	0	0	0	0	35	0	0	0	0	0	0	0	0	0	0	0	0	0	0	0	0	0	0	0	0
Bacteria_Actinobacteriota_Actinobacteria_Micrococcales_Dermatophilaceae_Dermatophilus	29	29	25	67	46	40	44	42	36	39	59	30	31	40	46	0	0	49	54	63	96	110	93	0	65	81	37	112	35	0	34	47	48	50	139	60	0	0	0	0	0	0	0	0	0	0	0	0	0
Bacteria_Actinobacteriota_Actinobacteria_Micrococcales_Dermatophilaceae_Mobilicoccus	606	605	93	146	42	0	643	455	154	100	83	0	544	607	238	82	47	0	0	0	0	0	0	0	0	0	0	0	0	0	0	0	0	0	0	0	0	0	20	0	0	0	0	0	0	0	0	0	0
Bacteria_Actinobacteriota_Actinobacteria_Micrococcales_Dermatophilaceae_Piscicoccus	0	0	0	0	0	0	0	0	0	0	0	0	0	0	0	0	0	0	0	0	0	0	0	0	0	0	0	0	0	0	0	0	0	0	0	0	62	35	0	0	0	0	0	18	0	0	78	0	0
Bacteria_Actinobacteriota_Actinobacteria_Micrococcales_Dermatophilaceae_uncultured	83	91	92	146	94	125	64	96	99	75	71	82	95	58	92	100	39	79	103	179	171	170	96	63	147	163	93	151	47	0	110	225	144	120	116	0	0	188	99	101	104	133	126	385	134	73	102	196	118
Bacteria_Actinobacteriota_Actinobacteria_Micrococcales_Intrasporangiaceae_Aquipuribacter	46	71	0	0	0	0	56	46	0	0	0	0	70	79	0	0	0	0	0	46	0	0	0	0	66	0	0	0	0	0	0	0	0	0	0	0	0	53	57	0	34	42	39	34	0	0	0	74	60
Bacteria_Actinobacteriota_Actinobacteria_Micrococcales_Intrasporangiaceae_Arsenicicoccus	0	0	0	0	0	0	0	0	0	0	0	0	0	0	0	0	0	0	0	0	0	0	0	0	0	0	0	0	0	0	0	0	0	0	0	0	0	0	0	0	0	0	0	120	51	0	0	0	0
Bacteria_Actinobacteriota_Actinobacteria_Micrococcales_Intrasporangiaceae_Intrasporangium	156	396	641	672	83	61	354	387	475	344	110	95	147	490	464	594	91	101	0	75	138	164	444	309	71	74	137	131	199	321	67	0	114	153	377	257	49	62	0	0	0	0	38	0	0	0	0	0	0
Bacteria_Actinobacteriota_Actinobacteria_Micrococcales_Intrasporangiaceae_Janibacter	109	110	98	144	349	159	111	136	161	196	386	121	86	104	102	70	282	127	211	345	440	386	245	103	216	219	310	335	249	42	205	171	165	263	245	0	50	180	144	123	121	134	115	274	88	27	90	228	95
Bacteria_Actinobacteriota_Actinobacteria_Micrococcales_Intrasporangiaceae_Knoellia	1386	962	106	66	54	138	807	589	123	82	64	197	971	661	254	83	97	309	123	0	105	0	0	0	120	0	69	56	0	0	123	87	112	60	0	0	75	105	254	173	378	368	373	315	142	100	99	194	175
Bacteria_Actinobacteriota_Actinobacteria_Micrococcales_Intrasporangiaceae_Lapillicoccus	0	0	0	0	0	0	0	0	0	0	0	0	0	0	0	0	0	62	0	0	0	0	0	0	0	0	0	0	0	0	0	0	0	0	0	0	0	0	0	0	0	59	0	32	0	0	0	0	0
Bacteria_Actinobacteriota_Actinobacteria_Micrococcales_Intrasporangiaceae_Ornithinicoccus	43	44	41	37	0	0	0	33	39	0	0	0	34	63	34	67	0	0	0	0	0	0	0	0	0	0	0	0	0	0	0	0	0	0	0	0	66	190	170	141	127	107	98	97	62	36	94	219	171
Bacteria_Actinobacteriota_Actinobacteria_Micrococcales_Intrasporangiaceae_Ornithinimicrobium	0	0	0	0	0	0	0	0	0	0	31	0	0	31	0	0	0	0	0	0	0	0	172	106	38	0	25	0	38	121	33	0	0	0	200	160	215	226	157	80	93	112	116	182	81	224	186	223	128
Bacteria_Actinobacteriota_Actinobacteria_Micrococcales_Intrasporangiaceae_Oryzihumus	0	0	0	0	0	0	0	0	0	0	0	0	0	0	0	0	0	0	0	0	0	0	0	0	40	0	0	0	0	0	59	0	0	0	0	0	63	131	100	93	103	91	87	79	90	28	74	96	108
Bacteria_Actinobacteriota_Actinobacteria_Micrococcales_Intrasporangiaceae_Pedococcus-Phycicoccus	0	0	0	0	0	0	0	0	0	0	0	0	0	0	0	0	0	0	0	0	0	0	697	1281	51	0	0	0	812	600	77	0	0	0	219	1340	44	250	322	198	152	165	181	110	127	61	127	393	194
Bacteria_Actinobacteriota_Actinobacteria_Micrococcales_Intrasporangiaceae_Terrabacter	0	0	0	0	0	0	0	0	0	0	0	0	0	0	0	0	0	0	0	0	0	0	0	0	58	0	0	0	0	0	72	0	0	0	0	0	0	84	72	72	52	70	85	54	44	0	77	120	64
Bacteria_Actinobacteriota_Actinobacteria_Micrococcales_Intrasporangiaceae_Tetrasphaera	336	449	577	589	887	378	387	336	481	597	819	735	335	323	573	768	364	481	377	281	363	323	571	469	254	279	287	304	174	605	392	292	606	371	332	262	618	1813	1195	736	1028	1484	509	721	495	547	920	1743	818
Bacteria_Actinobacteriota_Actinobacteria_Micrococcales_Intrasporangiaceae_uncultured	0	0	55	0	0	0	0	0	0	0	0	0	0	0	0	0	0	0	0	0	0	0	0	0	0	0	0	0	0	0	0	0	0	0	0	0	0	106	187	120	115	113	85	422	52	53	0	108	102
Bacteria_Actinobacteriota_Actinobacteria_Micrococcales_Microbacteriaceae_Agrococcus	371	221	65	81	50	0	292	171	46	45	35	31	391	199	109	61	35	34	110	118	79	108	0	84	135	121	78	96	46	60	131	83	59	103	45	44	120	336	242	156	204	221	178	353	193	108	130	306	171
Bacteria_Actinobacteriota_Actinobacteria_Micrococcales_Microbacteriaceae_Agromyces	192	268	212	262	157	118	174	292	271	162	103	70	154	289	215	266	117	114	118	118	71	91	69	58	107	114	80	84	94	68	151	101	54	60	66	85	359	527	520	349	335	342	344	1753	454	296	305	630	366
Bacteria_Actinobacteriota_Actinobacteria_Micrococcales_Microbacteriaceae_Amnibacterium	0	54	0	0	0	57	0	0	0	0	54	63	0	0	0	0	34	65	71	165	114	116	0	0	87	95	82	94	48	0	42	172	127	130	0	0	0	0	0	0	0	0	0	0	0	0	0	0	0
Bacteria_Actinobacteriota_Actinobacteria_Micrococcales_Microbacteriaceae_Aurantimicrobium	0	0	0	36	0	0	0	0	0	0	0	0	0	0	0	0	0	0	0	0	0	0	0	0	0	0	0	0	0	0	0	0	0	0	0	0	252	301	287	231	393	279	283	178	267	93	205	444	219
Bacteria_Actinobacteriota_Actinobacteria_Micrococcales_Microbacteriaceae_Candidatus Aquiluna	130	54	0	0	0	0	106	51	0	0	0	0	87	72	0	0	0	0	234	97	63	43	0	0	189	79	49	0	76	0	344	0	0	0	0	0	2175	167	149	109	121	58	77	59	40	31	449	424	120
Bacteria_Actinobacteriota_Actinobacteria_Micrococcales_Microbacteriaceae_Candidatus Flaviluna	0	0	0	0	0	0	0	0	0	0	0	0	0	0	0	0	0	0	0	0	0	0	0	0	0	0	0	0	0	0	0	0	0	0	0	36	0	21	15	23	0	0	0	29	0	0	0	32	0
Bacteria_Actinobacteriota_Actinobacteria_Micrococcales_Microbacteriaceae_Candidatus Limnoluna	0	47	0	0	0	0	0	61	0	0	0	0	0	39	0	0	0	0	0	0	0	0	0	0	0	0	0	0	0	0	0	0	0	0	0	0	264	531	479	267	461	413	382	171	158	53	189	725	237
Bacteria_Actinobacteriota_Actinobacteria_Micrococcales_Microbacteriaceae_Candidatus Planktoluna	148	147	40	76	71	61	86	115	67	85	72	86	120	101	42	72	67	51	46	70	49	99	110	109	148	39	83	112	70	106	121	45	67	153	89	0	0	50	55	31	40	42	36	145	81	37	0	28	32
Bacteria_Actinobacteriota_Actinobacteria_Micrococcales_Microbacteriaceae_Chryseoglobus	0	0	0	0	0	0	0	0	0	0	0	0	0	0	0	0	0	0	0	0	0	0	0	0	0	0	0	0	0	0	0	0	0	0	0	0	239	406	338	339	251	198	245	123	116	63	231	382	362
Bacteria_Actinobacteriota_Actinobacteria_Micrococcales_Microbacteriaceae_Clavibacter	0	0	0	0	0	0	0	0	0	0	0	0	0	0	0	0	0	0	0	0	0	0	0	0	0	0	0	0	0	0	0	0	0	0	0	0	0	0	0	26	0	36	23	0	0	0	0	31	23
Bacteria_Actinobacteriota_Actinobacteria_Micrococcales_Microbacteriaceae_Conyzicola	0	0	0	0	0	0	0	0	0	0	0	0	0	0	0	0	0	0	0	0	0	0	0	0	0	0	0	0	0	0	0	0	0	0	0	0	0	0	0	0	0	0	0	52	0	0	0	0	0
Bacteria_Actinobacteriota_Actinobacteria_Micrococcales_Microbacteriaceae_Cryobacterium	0	0	39	0	0	0	40	50	0	0	0	0	40	46	0	37	0	0	241	90	94	121	56	0	188	69	39	45	59	0	253	62	51	57	0	63	165	440	414	355	419	477	436	348	299	118	255	760	260
Bacteria_Actinobacteriota_Actinobacteria_Micrococcales_Microbacteriaceae_Cryocola	0	0	0	0	0	0	0	0	0	0	0	0	0	0	0	0	0	0	0	0	0	0	0	0	0	0	0	0	0	0	0	0	0	0	0	0	0	0	0	0	0	0	0	96	0	0	0	0	0
Bacteria_Actinobacteriota_Actinobacteria_Micrococcales_Microbacteriaceae_Curtobacterium	1403	821	287	318	171	130	827	638	301	249	168	157	988	647	323	170	176	161	249	280	204	187	280	116	397	358	231	154	163	147	263	356	153	158	234	103	196	640	588	389	363	336	306	509	282	154	401	789	368
Bacteria_Actinobacteriota_Actinobacteria_Micrococcales_Microbacteriaceae_DS001	0	0	0	0	0	0	0	0	0	0	0	0	0	0	0	0	0	0	0	0	0	0	0	0	0	0	0	0	0	0	0	0	0	0	0	0	110	90	106	389	423	589	1824	5616	12998	3340	0	130	99
Bacteria_Actinobacteriota_Actinobacteria_Micrococcales_Microbacteriaceae_Frigoribacterium	0	0	0	0	0	0	0	0	61	0	0	0	0	0	0	0	0	0	0	0	49	0	0	0	0	0	0	0	0	0	0	0	0	37	0	0	151	475	401	178	190	308	177	545	270	201	307	696	269
Bacteria_Actinobacteriota_Actinobacteria_Micrococcales_Microbacteriaceae_Frondihabitans	0	0	0	0	0	0	0	0	0	0	0	0	0	0	0	0	0	0	64	0	0	0	0	0	0	0	0	0	0	0	128	0	0	0	0	0	0	0	0	0	0	0	0	0	0	0	0	0	0
Bacteria_Actinobacteriota_Actinobacteria_Micrococcales_Microbacteriaceae_Galbitalea	0	0	0	0	0	0	0	0	0	0	0	0	0	0	0	0	0	0	0	0	0	0	0	0	0	0	0	0	0	0	0	0	0	0	0	0	46	93	121	109	148	555	261	37	0	31	118	127	137
Bacteria_Actinobacteriota_Actinobacteria_Micrococcales_Microbacteriaceae_Gryllotalpicola	26	0	31	0	0	0	0	0	0	0	0	0	0	0	0	0	0	0	0	0	0	0	0	0	0	0	0	0	0	0	0	0	0	0	0	0	86	280	293	158	120	161	101	97	44	20	195	331	137
Bacteria_Actinobacteriota_Actinobacteria_Micrococcales_Microbacteriaceae_Herbiconiux	0	0	0	0	0	0	0	0	0	0	0	0	0	0	0	0	0	0	0	0	0	0	0	0	0	0	0	0	0	0	0	0	0	0	0	0	0	0	76	77	0	0	0	0	0	0	0	69	74
Bacteria_Actinobacteriota_Actinobacteria_Micrococcales_Microbacteriaceae_Huakuichenia	41	25	0	0	0	55	46	31	0	0	0	26	27	0	24	0	0	0	30	53	62	31	91	32	51	65	54	101	29	0	38	36	37	27	58	0	0	0	0	0	0	0	0	0	0	0	0	0	0
Bacteria_Actinobacteriota_Actinobacteria_Micrococcales_Microbacteriaceae_Klugiella	0	64	0	0	0	0	50	0	0	0	0	0	0	72	0	0	0	0	0	0	0	0	0	0	0	0	0	0	0	0	0	0	0	0	0	0	0	53	50	68	93	77	48	22	0	0	0	97	0
Bacteria_Actinobacteriota_Actinobacteria_Micrococcales_Microbacteriaceae_Leifsonia	92	92	0	59	45	0	68	96	63	0	0	0	103	123	61	61	0	0	0	80	55	0	0	0	96	0	50	0	0	0	0	75	0	0	0	0	1140	1452	1700	303	266	222	241	345	161	74	730	1075	424
Bacteria_Actinobacteriota_Actinobacteria_Micrococcales_Microbacteriaceae_Leucobacter	249	292	197	174	155	218	211	329	126	151	203	206	241	275	146	192	120	140	162	233	319	411	1502	598	264	199	487	384	314	521	107	138	461	339	909	320	400	1313	1076	837	761	772	644	1570	582	274	844	1100	740
Bacteria_Actinobacteriota_Actinobacteria_Micrococcales_Microbacteriaceae_Lysinimonas	49	59	0	0	0	0	0	0	0	0	0	0	0	0	0	0	0	0	0	0	0	0	0	0	0	0	0	0	0	0	0	0	0	0	0	0	0	0	0	0	0	0	0	0	0	0	0	0	0
Bacteria_Actinobacteriota_Actinobacteria_Micrococcales_Microbacteriaceae_ML602J-51	288	251	0	0	0	0	325	218	72	29	0	0	243	263	68	43	0	0	115	112	59	40	0	0	143	71	31	30	0	0	129	53	50	32	0	0	1702	511	436	272	440	279	411	238	119	73	528	837	323
Bacteria_Actinobacteriota_Actinobacteria_Micrococcales_Microbacteriaceae_MWH-Ta3	0	46	25	33	0	0	0	28	0	0	0	0	0	44	0	0	0	0	0	0	0	0	0	0	0	0	0	0	0	0	0	0	99	33	0	0	127	52	33	23	40	18	20	13	0	0	44	101	27
Bacteria_Actinobacteriota_Actinobacteria_Micrococcales_Microbacteriaceae_Microbacterium	1294	2003	1208	995	1124	1701	1640	1718	1034	964	1324	1428	1094	1828	1085	1165	817	1317	841	842	1013	999	1904	1088	1022	871	847	869	1005	1303	1028	754	967	930	1800	1438	1264	2686	2976	1909	2033	2067	2019	4934	2621	1737	1679	3167	2204
Bacteria_Actinobacteriota_Actinobacteria_Micrococcales_Microbacteriaceae_Mycetocola	0	0	0	0	0	0	0	53	42	0	0	0	0	0	0	43	0	0	0	0	0	0	0	0	0	0	0	0	0	0	0	0	0	0	0	0	97	148	94	149	84	96	104	158	91	55	93	134	87
Bacteria_Actinobacteriota_Actinobacteria_Micrococcales_Microbacteriaceae_Okibacterium	0	0	0	0	0	0	0	0	0	0	0	0	0	0	0	40	0	0	0	0	0	0	0	0	0	0	0	0	0	0	0	0	0	0	0	0	0	0	0	0	0	0	0	0	0	0	0	0	0
Bacteria_Actinobacteriota_Actinobacteria_Micrococcales_Microbacteriaceae_Parafrigoribacterium	0	57	0	0	0	0	0	68	0	57	0	0	0	0	0	53	0	0	0	0	0	0	73	0	66	61	0	0	0	0	69	58	0	0	0	0	79	720	100	98	70	94	60	99	87	0	433	347	75
Bacteria_Actinobacteriota_Actinobacteria_Micrococcales_Microbacteriaceae_Plantibacter	0	0	0	0	0	0	0	0	0	0	0	0	0	0	0	0	0	0	0	0	0	0	0	0	0	0	0	0	0	0	0	0	0	0	0	0	0	85	57	42	0	60	78	0	39	0	69	102	65
Bacteria_Actinobacteriota_Actinobacteria_Micrococcales_Microbacteriaceae_Pseudoclavibacter	33	41	0	38	49	25	31	41	37	44	0	30	36	36	38	54	31	24	35	46	0	26	36	44	52	37	0	0	36	77	34	0	28	23	70	47	478	716	703	574	468	457	282	208	98	72	385	572	512
Bacteria_Actinobacteriota_Actinobacteria_Micrococcales_Microbacteriaceae_Rathayibacter	0	0	0	0	0	0	0	0	0	0	0	0	0	0	0	0	0	0	0	0	0	0	0	0	0	0	0	0	0	0	0	0	0	0	0	0	0	26	0	0	28	0	28	166	55	25	0	27	0
Bacteria_Actinobacteriota_Actinobacteria_Micrococcales_Microbacteriaceae_Rhodoglobus	0	0	0	0	0	0	0	0	0	0	0	0	0	0	0	0	0	0	0	0	0	0	0	0	0	0	0	0	0	0	0	0	0	0	0	0	0	0	0	0	0	0	0	0	0	0	0	0	0
Bacteria_Actinobacteriota_Actinobacteria_Micrococcales_Microbacteriaceae_SV1-3	0	0	0	0	59	0	0	0	0	0	0	0	0	0	0	0	42	0	0	0	0	0	0	0	0	0	0	0	0	0	0	0	0	0	0	0	0	0	0	0	0	0	0	0	0	0	0	0	0
Bacteria_Actinobacteriota_Actinobacteria_Micrococcales_Microbacteriaceae_Salinibacterium	96	93	113	104	0	0	79	128	0	61	0	0	0	131	67	0	0	62	0	0	0	0	0	0	0	0	0	0	0	0	0	0	0	0	0	0	0	45	47	0	0	0	0	0	0	0	0	67	0
Bacteria_Actinobacteriota_Actinobacteria_Micrococcales_Microbacteriaceae_Subtercola	0	0	0	0	0	0	0	0	0	0	0	0	0	0	0	0	0	0	0	0	0	0	0	0	0	0	0	0	0	0	0	0	0	0	0	0	0	0	0	0	0	0	0	26	0	0	0	0	0
Bacteria_Actinobacteriota_Actinobacteria_Micrococcales_Microbacteriaceae_Yonghaparkia	0	0	0	0	0	0	0	0	0	0	0	0	0	0	0	0	0	0	0	0	0	0	0	0	0	0	0	0	0	0	0	0	0	0	0	0	0	63	0	68	0	0	0	0	0	0	0	71	49
Bacteria_Actinobacteriota_Actinobacteria_Micrococcales_Microbacteriaceae_uncultured	146	185	199	141	60	78	123	189	140	106	46	58	145	233	172	128	44	77	0	107	71	0	0	0	89	105	59	44	0	0	139	124	0	0	0	0	236	617	543	356	320	383	335	1160	315	149	340	788	408
Bacteria_Actinobacteriota_Actinobacteria_Micrococcales_Micrococcaceae_Acaricomes	0	0	0	0	0	0	0	0	41	0	0	0	0	0	0	0	0	0	0	0	0	0	0	0	0	0	0	0	0	0	0	0	0	0	0	0	0	0	0	0	0	0	0	0	0	0	0	0	0
Bacteria_Actinobacteriota_Actinobacteria_Micrococcales_Micrococcaceae_Arthrobacter	1177	1630	1735	2033	859	574	1548	1422	1796	1204	946	739	1028	1723	1616	1320	704	553	1015	973	1096	908	796	570	1046	900	777	780	721	477	1182	716	831	673	759	429	668	1818	1692	1048	1000	1375	1063	2245	1088	630	1047	2261	1215
Bacteria_Actinobacteriota_Actinobacteria_Micrococcales_Micrococcaceae_Citricoccus	126	331	331	318	81	0	241	248	360	231	144	0	167	254	264	170	42	49	78	136	82	114	0	0	178	109	128	127	81	138	112	77	95	77	0	0	0	33	0	0	0	0	0	22	0	0	0	0	0
Bacteria_Actinobacteriota_Actinobacteria_Micrococcales_Micrococcaceae_Enteractinococcus	0	28	34	19	0	20	0	20	0	0	0	0	26	0	28	0	0	16	0	0	0	0	0	0	0	17	0	0	0	0	0	19	0	0	0	0	16	49	47	19	29	34	40	33	29	16	26	57	26
Bacteria_Actinobacteriota_Actinobacteria_Micrococcales_Micrococcaceae_Garicola	114	106	63	42	35	35	74	71	42	29	21	0	83	77	36	30	26	0	63	83	46	35	0	46	128	84	42	41	45	43	54	76	23	36	0	37	55	137	164	97	99	103	113	153	104	45	106	134	130
Bacteria_Actinobacteriota_Actinobacteria_Micrococcales_Micrococcaceae_Glutamicibacter	469	490	503	482	303	258	438	397	416	378	380	286	405	539	426	544	210	207	597	562	439	427	772	570	607	552	334	341	416	440	513	481	509	501	703	714	202	579	537	343	408	430	405	1447	699	459	320	716	448
Bacteria_Actinobacteriota_Actinobacteria_Micrococcales_Micrococcaceae_Haematomicrobium	0	0	0	0	0	0	0	0	0	0	0	0	0	0	0	0	0	0	28	26	0	0	0	0	24	0	0	0	0	0	24	22	0	0	0	0	0	0	0	0	0	0	0	0	0	0	0	0	0
Bacteria_Actinobacteriota_Actinobacteria_Micrococcales_Micrococcaceae_Kocuria	680	704	548	571	611	622	515	593	556	505	667	648	559	571	579	719	448	644	708	653	412	375	736	900	834	619	450	424	424	639	549	633	367	309	588	370	524	1160	1265	786	734	914	723	1431	633	426	773	1385	864
Bacteria_Actinobacteriota_Actinobacteria_Micrococcales_Micrococcaceae_Micrococcus	1337	2002	1984	2478	984	600	1527	1891	2104	1509	705	1088	1058	2131	1741	1584	710	653	785	811	719	696	914	567	837	927	711	621	807	485	913	721	541	619	750	594	962	3139	2604	1733	1731	1743	1485	2831	1270	896	1750	3601	1840
Bacteria_Actinobacteriota_Actinobacteria_Micrococcales_Micrococcaceae_Nesterenkonia	381	859	563	554	202	131	418	578	434	281	200	170	368	724	448	438	215	162	144	251	192	114	140	150	259	195	154	160	117	142	166	124	116	128	121	103	50	135	195	118	81	101	103	170	89	88	93	192	119
Bacteria_Actinobacteriota_Actinobacteria_Micrococcales_Micrococcaceae_Paenarthrobacter	185	219	243	228	121	80	193	220	149	193	102	223	228	224	250	1510	199	129	362	330	346	213	499	241	317	206	160	199	125	170	308	238	353	167	340	276	164	310	364	169	248	298	212	485	351	254	257	285	167
Bacteria_Actinobacteriota_Actinobacteria_Micrococcales_Micrococcaceae_Paeniglutamicibacter	79	66	0	44	0	0	71	33	0	0	0	0	67	71	0	63	0	0	0	0	0	0	0	0	55	0	0	0	0	0	83	64	0	44	0	0	0	37	47	33	46	38	31	79	48	21	31	30	42
Bacteria_Actinobacteriota_Actinobacteria_Micrococcales_Micrococcaceae_Pseudarthrobacter	1318	2219	2273	2648	1143	1061	1500	2011	2494	1766	1025	1225	1319	2086	1788	1830	777	1207	979	1286	1462	1358	1586	984	1053	1197	1172	1212	950	865	1084	890	1377	1390	949	572	538	1549	1532	1088	1169	1113	1102	1725	1174	846	1063	2039	1143
Bacteria_Actinobacteriota_Actinobacteria_Micrococcales_Micrococcaceae_Pseudoglutamicibacter	0	0	0	0	0	0	0	0	0	0	0	0	0	0	0	0	0	0	0	0	0	0	0	0	0	0	0	0	0	0	0	0	0	0	0	0	0	0	0	0	0	0	0	76	0	0	0	0	0
Bacteria_Actinobacteriota_Actinobacteria_Micrococcales_Micrococcaceae_Renibacterium	0	0	0	0	0	0	0	0	0	0	0	0	0	0	0	0	0	0	0	0	0	0	0	0	0	0	0	0	0	0	0	0	0	0	0	0	0	0	0	0	0	0	0	20	0	0	0	0	0
Bacteria_Actinobacteriota_Actinobacteria_Micrococcales_Micrococcaceae_Rothia	989	1116	991	930	891	684	816	959	835	874	694	728	794	1016	848	1018	658	711	1370	1685	1864	1753	4409	812	1408	1391	1518	1514	1837	627	1355	1126	1394	1886	2232	561	2079	9532	7564	5358	3157	4335	3272	4423	1929	1381	5171	12481	4488
Bacteria_Actinobacteriota_Actinobacteria_Micrococcales_Micrococcaceae_Sinomonas	0	0	0	0	141	116	0	0	0	38	84	39	0	0	0	28	134	45	0	0	56	62	0	361	0	0	39	50	38	351	0	41	112	298	0	0	26	116	77	35	23	27	21	100	23	0	44	124	36
Bacteria_Actinobacteriota_Actinobacteria_Micrococcales_Micrococcaceae_Yaniella	0	0	0	0	0	0	0	0	0	0	0	0	0	0	0	0	0	0	0	0	0	0	0	0	0	0	0	0	0	0	0	0	0	0	0	0	0	37	39	21	23	19	35	17	27	0	0	25	0
Bacteria_Actinobacteriota_Actinobacteria_Micrococcales_Micrococcaceae_Zhihengliuella	0	0	0	0	0	0	0	0	0	0	0	0	0	0	0	0	0	0	0	0	0	0	61	0	0	0	0	0	0	45	0	0	0	0	71	0	0	0	0	0	0	0	29	109	63	27	0	0	0
Bacteria_Actinobacteriota_Actinobacteria_Micrococcales_Micrococcaceae_uncultured	44	55	58	38	70	25	55	60	46	62	71	43	59	60	48	36	66	40	63	51	47	30	0	40	45	41	31	50	0	29	36	43	34	46	0	0	38	120	147	72	126	126	98	166	99	54	61	164	101
Bacteria_Actinobacteriota_Actinobacteria_Micrococcales_Micrococcales Incertae Sedis_Timonella	24	47	0	0	0	0	30	35	0	0	0	0	24	37	31	0	0	0	0	0	0	0	0	0	0	0	0	0	0	0	0	0	0	0	0	0	0	67	38	32	34	30	35	178	121	75	42	69	27
Bacteria_Actinobacteriota_Actinobacteria_Micrococcales_Promicromonosporaceae_Cellulosimicrobium	42	50	0	61	75	39	39	39	55	0	51	0	0	0	0	57	41	0	0	60	0	0	63	0	58	0	0	0	0	0	0	68	0	45	53	59	55	276	196	134	115	183	160	877	273	120	148	425	165
Bacteria_Actinobacteriota_Actinobacteria_Micrococcales_Promicromonosporaceae_Isoptericola	94	280	418	431	260	228	119	186	266	230	212	245	66	224	348	428	119	259	457	367	121	58	96	0	265	225	81	71	47	0	378	293	165	78	38	53	58	198	169	122	68	79	94	545	129	71	99	182	106
Bacteria_Actinobacteriota_Actinobacteria_Micrococcales_Promicromonosporaceae_Krasilnikoviella	0	0	0	0	0	0	0	0	0	0	0	0	0	0	0	0	0	0	0	0	0	0	0	0	0	0	0	0	0	0	0	0	0	0	0	0	0	0	0	0	0	0	0	65	0	0	0	0	0
Bacteria_Actinobacteriota_Actinobacteria_Micrococcales_Promicromonosporaceae_Myceligenerans	0	0	0	0	0	0	0	0	0	0	0	0	0	0	0	0	0	0	0	0	0	0	0	0	0	0	0	0	0	0	0	0	0	0	0	0	0	0	0	0	0	0	0	22	0	0	0	0	0
Bacteria_Actinobacteriota_Actinobacteria_Micrococcales_Promicromonosporaceae_Promicromonospora	53	0	0	0	0	0	0	0	0	0	0	0	0	0	0	0	0	0	0	0	0	0	0	0	0	0	0	0	0	0	0	46	0	0	0	0	0	97	91	71	52	69	64	347	86	55	44	161	60
Bacteria_Actinobacteriota_Actinobacteria_Micrococcales_Rarobacteraceae_Rarobacter	0	0	0	0	0	0	0	0	0	0	0	0	0	0	0	0	0	0	0	0	0	0	0	0	0	0	0	0	0	0	0	0	0	0	0	0	0	0	0	0	0	0	0	22	0	0	0	0	0
Bacteria_Actinobacteriota_Actinobacteria_Micrococcales_Ruaniaceae_Ruania	0	0	0	0	0	0	0	0	0	0	0	0	0	0	0	0	0	0	0	0	0	0	0	0	0	0	0	0	0	0	0	0	0	0	0	0	0	50	0	0	0	0	0	0	0	0	25	0	0
Bacteria_Actinobacteriota_Actinobacteria_Micrococcales_Sanguibacteraceae_Sanguibacter-Flavimobilis	36	39	44	58	131	59	0	34	68	59	92	60	0	0	0	59	74	61	51	0	47	0	76	0	53	0	0	0	41	0	0	45	0	32	62	162	68	258	137	87	87	110	111	377	120	59	124	218	110
Bacteria_Actinobacteriota_Actinobacteria_Micromonosporales_Micromonosporaceae_Actinocatenispora	33	36	32	41	244	626	27	24	62	70	374	998	0	38	41	62	173	596	98	146	559	789	912	4285	109	288	868	796	346	1704	45	128	495	1547	1487	1714	0	0	0	0	18	23	16	16	25	68	0	0	0
Bacteria_Actinobacteriota_Actinobacteria_Micromonosporales_Micromonosporaceae_Actinoplanes	264	492	242	287	240	238	364	318	230	183	220	177	271	336	284	157	232	210	164	280	333	463	457	328	209	249	398	458	198	117	148	251	384	615	548	393	362	612	583	273	320	420	325	623	267	191	446	747	340
Bacteria_Actinobacteriota_Actinobacteria_Micromonosporales_Micromonosporaceae_Actinorhabdospora	0	0	0	0	0	0	0	0	0	0	0	0	0	0	0	0	0	0	0	0	0	0	0	0	0	0	0	0	0	0	0	0	0	0	0	0	0	0	0	0	0	0	0	0	0	0	0	0	0
Bacteria_Actinobacteriota_Actinobacteria_Micromonosporales_Micromonosporaceae_Allocatelliglobosispora	25	30	0	0	32	23	0	0	0	0	39	58	0	22	0	0	0	29	81	128	63	63	26	0	65	74	30	45	0	0	70	62	74	45	0	0	0	0	0	0	0	0	0	14	0	0	0	0	0
Bacteria_Actinobacteriota_Actinobacteria_Micromonosporales_Micromonosporaceae_Asanoa	68	77	0	0	0	0	92	71	0	0	0	0	81	60	0	0	0	0	0	0	0	0	0	0	0	0	0	0	0	0	0	0	0	0	0	0	27	68	53	0	45	54	41	100	32	30	0	52	39
Bacteria_Actinobacteriota_Actinobacteria_Micromonosporales_Micromonosporaceae_Catellatospora	0	0	0	0	0	0	0	0	0	0	0	0	0	0	0	0	55	0	0	0	0	0	0	0	0	0	0	0	0	0	36	0	0	0	0	0	0	0	21	0	0	24	20	0	0	0	0	23	0
Bacteria_Actinobacteriota_Actinobacteria_Micromonosporales_Micromonosporaceae_Catenuloplanes	67	0	0	0	0	0	28	0	0	0	0	0	48	0	0	54	0	0	0	0	0	0	0	0	0	0	0	0	0	0	0	0	0	0	0	0	21	53	63	62	81	111	82	37	42	33	37	66	50
Bacteria_Actinobacteriota_Actinobacteria_Micromonosporales_Micromonosporaceae_Dactylosporangium	0	29	42	26	0	0	37	37	27	0	0	0	29	0	31	0	0	0	0	34	35	0	0	0	51	42	0	0	0	0	33	38	0	32	0	0	0	41	48	72	42	100	84	39	43	40	32	85	39
Bacteria_Actinobacteriota_Actinobacteria_Micromonosporales_Micromonosporaceae_Krasilnikovia	0	0	0	0	0	0	0	0	0	0	0	0	0	0	0	0	0	0	0	0	0	0	0	0	0	0	0	0	0	0	0	0	0	0	0	0	0	0	0	0	0	0	0	0	0	0	0	0	0
Bacteria_Actinobacteriota_Actinobacteria_Micromonosporales_Micromonosporaceae_Longispora	27	0	0	0	0	0	0	0	0	0	0	0	21	0	0	0	0	0	35	33	48	44	0	0	58	117	42	38	0	0	31	66	27	26	0	0	30	115	102	47	46	64	38	12	24	16	58	175	96
Bacteria_Actinobacteriota_Actinobacteria_Micromonosporales_Micromonosporaceae_Luedemannella	1066	1533	1375	1380	1063	851	1143	1349	1050	1080	892	817	1008	1304	1155	1291	940	812	818	1010	1268	1113	1698	1380	1018	1137	1075	1121	1187	1044	778	781	1190	1513	1698	1208	104	162	151	97	61	116	77	76	80	68	110	146	104
Bacteria_Actinobacteriota_Actinobacteria_Micromonosporales_Micromonosporaceae_Micromonospora	1012	1094	871	637	1049	441	909	1034	597	659	663	379	1221	1252	768	1351	621	346	676	723	1489	1251	848	413	968	1238	527	1232	772	280	738	1431	1021	961	666	390	1175	3092	2746	1633	1845	2435	1991	2882	1822	1195	1929	3952	1796
Bacteria_Actinobacteriota_Actinobacteria_Micromonosporales_Micromonosporaceae_Pilimelia	0	0	0	0	0	0	0	0	0	0	0	0	0	0	0	0	0	0	0	0	0	0	0	0	0	0	0	0	0	0	0	0	0	0	0	58	0	0	0	0	0	0	0	155	0	0	0	0	0
Bacteria_Actinobacteriota_Actinobacteria_Micromonosporales_Micromonosporaceae_Planosporangium	0	0	0	0	0	0	0	0	0	0	0	0	0	0	0	0	0	0	0	0	0	0	0	0	0	0	0	0	0	0	0	0	0	0	0	0	0	0	0	0	0	0	0	0	0	0	0	0	0
Bacteria_Actinobacteriota_Actinobacteria_Micromonosporales_Micromonosporaceae_Plantactinospora	0	124	95	82	100	107	88	58	118	112	83	132	0	53	98	66	107	46	0	0	76	85	118	0	0	0	45	94	105	0	0	88	64	0	91	101	0	0	0	0	0	0	0	0	0	27	0	0	0
Bacteria_Actinobacteriota_Actinobacteria_Micromonosporales_Micromonosporaceae_Salinispora	50	59	73	55	75	136	58	69	28	46	54	209	40	60	50	108	55	37	123	128	508	928	1128	253	166	181	249	654	782	117	126	204	321	403	635	730	0	76	74	36	55	47	43	22	29	27	51	81	47
Bacteria_Actinobacteriota_Actinobacteria_Micromonosporales_Micromonosporaceae_Stackebrandtia	18	43	21	0	0	22	22	29	0	0	0	19	0	35	17	0	0	0	0	0	24	0	0	0	0	0	0	19	0	0	0	0	0	0	0	0	0	19	17	15	12	0	0	0	0	0	24	15	0
Bacteria_Actinobacteriota_Actinobacteria_Micromonosporales_Micromonosporaceae_Verrucosispora	0	0	0	0	0	0	0	0	0	0	0	0	0	0	0	0	0	0	397	202	254	150	0	0	797	194	100	119	138	0	838	229	0	138	0	0	0	144	291	206	230	195	243	107	88	88	78	224	257
Bacteria_Actinobacteriota_Actinobacteria_Micromonosporales_Micromonosporaceae_Virgisporangium	0	0	0	0	0	0	0	0	0	0	0	0	0	0	0	0	0	0	0	0	0	0	0	0	0	0	0	0	0	0	0	0	0	0	0	0	0	34	49	0	0	31	21	18	20	23	0	33	0
Bacteria_Actinobacteriota_Actinobacteria_Micromonosporales_Micromonosporaceae_uncultured	77	106	44	73	62	93	93	81	58	50	43	74	101	101	61	189	53	81	114	109	152	152	432	410	72	97	106	118	218	429	104	139	144	145	546	355	71	448	324	215	188	282	181	87	114	82	312	435	207
Bacteria_Actinobacteriota_Actinobacteria_Nitriliruptorales_Nitriliruptoraceae_Egicoccus	593	781	667	792	0	0	482	828	597	577	466	0	600	649	749	421	392	1063	0	0	0	0	0	0	0	0	0	0	0	0	0	0	0	0	0	0	0	0	0	0	0	0	0	0	0	0	0	216	0
Bacteria_Actinobacteriota_Actinobacteria_Nitriliruptorales_Nitriliruptoraceae_Nitriliruptor	143	107	0	0	0	0	204	0	173	0	0	0	0	0	169	223	0	0	0	0	0	0	0	0	0	0	0	0	0	0	0	0	0	0	0	0	0	0	0	0	0	0	0	0	0	428	0	0	0
Bacteria_Actinobacteriota_Actinobacteria_Nitriliruptorales_Nitriliruptoraceae_YC-ZSS-LKJ90	184	368	620	634	2487	3392	193	320	455	1001	1629	4149	277	330	467	671	1377	1255	513	997	2349	0	5942	0	758	1160	0	2844	0	951	0	870	1755	1916	0	1680	176	431	370	237	303	374	324	0	0	0	249	290	309
Bacteria_Actinobacteriota_Actinobacteria_Propionibacteriales_Nocardioidaceae_Actinopolymorpha	57	53	44	41	0	0	80	110	78	21	0	29	55	131	37	32	0	0	0	0	0	0	41	0	0	0	0	0	32	0	0	0	0	0	0	0	828	1604	1668	480	1416	1425	1741	1236	3173	675	971	1173	897
Bacteria_Actinobacteriota_Actinobacteria_Propionibacteriales_Nocardioidaceae_Aeromicrobium	359	490	585	612	564	690	494	519	563	673	748	525	335	495	586	489	399	654	185	131	184	114	87	64	225	197	471	210	111	0	221	101	101	70	34	0	56	232	188	153	177	210	146	138	124	79	120	243	135
Bacteria_Actinobacteriota_Actinobacteria_Propionibacteriales_Nocardioidaceae_Kribbella	165	199	130	117	156	106	121	132	146	128	122	111	154	153	155	161	108	77	93	194	358	384	125	187	166	168	306	328	167	144	131	127	625	766	143	74	147	443	459	230	242	272	215	218	229	231	192	518	274
Bacteria_Actinobacteriota_Actinobacteria_Propionibacteriales_Nocardioidaceae_Marmoricola	101	88	182	120	271	150	97	97	138	149	176	112	105	118	131	128	212	102	196	202	91	79	120	59	254	157	145	129	83	58	208	130	63	66	41	203	340	511	405	279	443	346	353	211	110	64	319	525	240
Bacteria_Actinobacteriota_Actinobacteria_Propionibacteriales_Nocardioidaceae_Nocardioides	5728	3589	710	820	800	834	3458	2365	909	679	742	1061	5080	2682	1070	843	880	760	627	667	616	644	634	526	1042	670	665	540	668	656	887	699	455	673	654	386	1039	3236	2505	1875	2446	2989	2410	1490	1187	714	1862	3836	2116
Bacteria_Actinobacteriota_Actinobacteria_Propionibacteriales_Nocardioidaceae_Tenggerimyces	0	0	0	0	0	0	0	0	0	0	0	0	0	0	0	0	0	0	0	0	0	0	0	0	0	0	0	0	0	0	0	0	0	0	0	0	0	0	0	0	47	106	120	0	0	0	0	0	0
Bacteria_Actinobacteriota_Actinobacteria_Propionibacteriales_Nocardioidaceae_uncultured	121	96	139	116	286	122	120	120	117	121	160	88	104	114	116	119	134	138	272	487	764	837	655	371	204	362	540	559	360	102	147	290	1182	992	811	421	288	669	1095	623	825	826	929	1207	1693	883	371	1083	554
Bacteria_Actinobacteriota_Actinobacteria_Propionibacteriales_Propionibacteriaceae_Acidipropionibacterium	38	71	39	37	15	35	40	42	35	23	37	24	36	52	27	47	0	27	20	33	18	0	101	147	23	15	0	21	66	260	20	51	0	0	53	74	0	0	0	0	0	0	0	21	0	0	0	0	0
Bacteria_Actinobacteriota_Actinobacteria_Propionibacteriales_Propionibacteriaceae_Aestuariimicrobium	473	559	380	490	322	163	438	481	374	351	294	202	367	454	372	414	216	205	90	109	262	246	379	412	196	128	324	240	140	240	122	81	373	408	712	335	54	98	135	107	180	137	120	100	34	55	65	138	104
Bacteria_Actinobacteriota_Actinobacteria_Propionibacteriales_Propionibacteriaceae_Brooklawnia	0	0	0	0	0	0	0	0	0	0	0	0	0	0	0	0	0	0	0	41	318	605	2138	1165	21	52	322	332	1054	1309	0	0	197	628	1133	1642	0	23	13	0	0	14	0	0	0	0	0	18	0
Bacteria_Actinobacteriota_Actinobacteria_Propionibacteriales_Propionibacteriaceae_Cutibacterium	5072	6119	5559	6116	4885	3199	4511	4971	5846	6150	4688	3394	4173	5205	5562	8259	3254	2664	4201	3989	3476	3156	4103	3393	4226	3614	2976	2994	2860	3154	3484	2700	4019	3071	3402	3235	3235	6291	5745	3485	4168	4863	3719	5157	3508	2474	4138	6882	4252
Bacteria_Actinobacteriota_Actinobacteria_Propionibacteriales_Propionibacteriaceae_Friedmanniella	134	139	154	565	587	512	155	113	106	204	347	479	150	130	157	370	267	220	45	44	50	42	58	42	83	62	49	47	51	68	91	62	35	46	32	0	111	107	89	50	54	53	28	48	33	23	83	87	48
Bacteria_Actinobacteriota_Actinobacteria_Propionibacteriales_Propionibacteriaceae_Granulicoccus	0	0	0	0	0	0	0	0	0	0	0	0	0	0	0	0	0	0	0	0	0	0	33	0	0	0	0	0	0	0	0	0	0	0	0	0	0	0	0	0	0	0	0	0	0	0	0	0	0
Bacteria_Actinobacteriota_Actinobacteria_Propionibacteriales_Propionibacteriaceae_Haloactinopolyspora	54	50	0	53	76	0	0	0	56	57	51	0	0	0	0	57	66	0	0	72	45	0	0	0	48	61	55	44	0	0	0	0	47	90	0	0	0	201	182	61	81	90	82	167	106	109	131	215	123
Bacteria_Actinobacteriota_Actinobacteria_Propionibacteriales_Propionibacteriaceae_Jiangella	0	0	0	0	0	0	0	0	0	0	0	0	0	0	0	0	0	0	0	0	0	0	0	0	0	0	0	0	0	0	0	0	0	0	0	0	0	0	0	0	0	0	0	0	0	0	0	0	0
Bacteria_Actinobacteriota_Actinobacteria_Propionibacteriales_Propionibacteriaceae_Luteococcus	44	24	0	0	0	0	44	22	0	0	0	0	29	60	0	0	0	0	101	141	34	22	0	0	119	104	43	24	27	0	135	129	25	0	0	0	0	18	16	13	24	12	15	15	34	30	0	0	20
Bacteria_Actinobacteriota_Actinobacteria_Propionibacteriales_Propionibacteriaceae_Marinilutecoccus	226	572	361	430	24	0	380	508	363	290	0	0	187	521	350	436	0	0	108	161	41	39	0	0	291	164	120	82	46	0	128	79	73	47	148	31	16	62	54	47	54	30	59	102	45	20	40	61	33
Bacteria_Actinobacteriota_Actinobacteria_Propionibacteriales_Propionibacteriaceae_Microlunatus	128	212	168	158	122	147	156	192	144	124	106	131	104	300	149	134	91	111	74	100	56	84	95	107	100	99	73	78	94	102	82	98	72	97	74	83	109	363	312	190	167	195	149	157	127	98	198	457	193
Bacteria_Actinobacteriota_Actinobacteria_Propionibacteriales_Propionibacteriaceae_Micropruina	96	110	106	104	182	128	99	86	130	107	135	95	83	98	90	88	133	111	39	58	70	86	80	89	69	45	90	82	65	91	37	62	51	176	77	35	19	36	43	20	39	53	32	34	44	21	28	43	32
Bacteria_Actinobacteriota_Actinobacteria_Propionibacteriales_Propionibacteriaceae_Naumannella	0	0	0	0	0	0	0	0	0	0	0	0	0	0	0	0	0	0	0	33	36	0	0	0	0	0	0	0	0	0	0	28	62	49	0	0	0	0	0	0	0	0	0	0	0	0	0	0	0
Bacteria_Actinobacteriota_Actinobacteria_Propionibacteriales_Propionibacteriaceae_Phytoactinopolyspora	0	0	0	0	24	74	0	0	0	0	90	45	0	0	0	0	42	67	0	35	0	0	0	0	39	33	0	0	0	0	0	40	31	0	0	0	0	18	0	0	0	0	0	0	0	0	0	0	0
Bacteria_Actinobacteriota_Actinobacteria_Propionibacteriales_Propionibacteriaceae_Propionibacterium	59	110	134	211	43	40	66	98	91	118	53	128	26	76	118	158	51	35	69	119	64	90	45	0	82	77	38	30	38	0	49	90	123	96	0	0	19	27	23	0	12	18	13	0	13	12	0	18	22
Bacteria_Actinobacteriota_Actinobacteria_Propionibacteriales_Propionibacteriaceae_Propionicicella	80	77	152	135	58	34	67	77	113	71	70	62	69	103	107	94	0	48	339	409	233	243	0	0	321	374	295	325	122	52	135	252	203	144	68	0	1985	9857	7539	3733	1163	1287	790	232	155	76	5280	10902	3858
Bacteria_Actinobacteriota_Actinobacteria_Propionibacteriales_Propionibacteriaceae_Propioniciclava	141	168	247	190	187	120	125	174	104	144	119	111	131	138	194	142	131	57	24	25	0	0	0	0	40	30	0	0	0	0	44	0	0	0	22	0	34	171	194	126	104	140	100	114	72	54	99	194	132
Bacteria_Actinobacteriota_Actinobacteria_Propionibacteriales_Propionibacteriaceae_Propionicimonas	0	0	0	29	0	0	0	0	0	35	0	0	0	0	0	0	0	0	0	41	41	30	0	0	30	35	0	40	0	0	0	34	0	33	0	0	53	54	71	50	42	67	74	54	54	21	53	105	78
Bacteria_Actinobacteriota_Actinobacteria_Propionibacteriales_Propionibacteriaceae_Propioniferax	0	0	0	0	0	0	0	0	0	0	0	0	0	0	0	0	0	0	0	0	0	0	0	0	0	0	0	0	0	0	0	0	0	0	0	0	108	361	172	151	199	372	419	141	48	22	178	377	154
Bacteria_Actinobacteriota_Actinobacteria_Propionibacteriales_Propionibacteriaceae_Propionimicrobium	0	0	20	0	0	0	0	21	22	0	0	0	0	17	0	0	0	0	0	0	0	0	0	0	0	0	0	0	0	0	0	0	0	0	0	0	55	148	187	102	133	189	154	68	64	22	69	224	78
Bacteria_Actinobacteriota_Actinobacteria_Propionibacteriales_Propionibacteriaceae_Pseudopropionibacterium	23	58	29	26	19	0	28	31	34	0	24	0	35	28	24	65	0	0	52	67	30	35	55	66	128	65	44	29	19	38	44	63	42	31	102	24	66	77	98	50	52	72	50	38	29	29	54	91	73
Bacteria_Actinobacteriota_Actinobacteria_Propionibacteriales_Propionibacteriaceae_Raineyella	0	29	0	0	0	0	0	22	0	0	0	28	0	32	27	0	0	0	91	64	0	19	0	0	106	107	27	27	0	0	148	137	0	0	0	0	0	23	0	0	0	0	0	16	15	0	19	23	0
Bacteria_Actinobacteriota_Actinobacteria_Propionibacteriales_Propionibacteriaceae_Tessaracoccus	80	124	114	190	201	78	118	132	181	173	116	55	88	105	186	204	116	118	491	345	122	63	55	46	409	252	64	55	59	41	467	325	60	50	35	0	67	198	138	109	110	109	85	83	56	33	100	154	99
Bacteria_Actinobacteriota_Actinobacteria_Propionibacteriales_Propionibacteriaceae_uncultured	9388	6988	11038	5817	4049	4399	5880	8762	3953	4534	2491	2814	10303	6623	8862	5122	3338	2426	15398	14178	8609	6397	1153	758	18211	20262	3854	4985	6719	738	13793	25067	3796	1124	278	565	30012	122760	109680	86312	91948	119977	99307	28629	32805	20539	65121	176231	78989
Bacteria_Actinobacteriota_Actinobacteria_Pseudonocardiales_Pseudonocardiaceae_Actinoalloteichus	0	0	0	0	0	0	0	0	0	0	0	0	0	0	0	0	0	0	0	0	0	0	0	0	0	0	0	0	0	0	0	0	0	0	0	0	0	0	0	0	0	0	0	0	0	0	0	0	0
Bacteria_Actinobacteriota_Actinobacteria_Pseudonocardiales_Pseudonocardiaceae_Actinokineospora	0	0	0	0	0	0	0	0	0	0	0	0	0	0	0	0	0	0	0	0	0	0	0	0	0	0	0	0	0	0	0	0	0	0	0	0	28	49	68	33	30	45	35	28	20	18	0	58	30
Bacteria_Actinobacteriota_Actinobacteria_Pseudonocardiales_Pseudonocardiaceae_Actinomycetospora	0	0	0	0	0	0	0	0	0	0	0	0	0	0	0	0	0	0	0	0	0	0	0	43	0	0	0	0	0	0	0	0	0	0	0	0	0	42	47	47	27	44	24	0	21	0	29	65	29
Bacteria_Actinobacteriota_Actinobacteria_Pseudonocardiales_Pseudonocardiaceae_Actinophytocola	0	0	0	0	0	0	0	0	0	0	0	0	0	0	0	0	0	0	0	0	0	0	0	0	0	0	0	0	0	0	0	0	0	0	0	0	18	29	0	22	17	25	26	36	0	21	28	42	36
Bacteria_Actinobacteriota_Actinobacteria_Pseudonocardiales_Pseudonocardiaceae_Actinopolyspora	0	0	16	50	0	0	0	16	23	0	0	0	0	29	33	28	0	0	0	0	0	0	0	76	0	17	0	0	0	19	0	0	0	0	0	0	43	43	20	0	0	18	11	16	14	12	42	29	27
Bacteria_Actinobacteriota_Actinobacteria_Pseudonocardiales_Pseudonocardiaceae_Actinorectispora	0	0	0	0	0	0	0	0	0	0	0	0	0	0	0	0	0	0	0	0	0	0	0	0	0	0	0	0	0	0	0	0	0	0	0	0	0	49	0	0	0	0	0	0	0	0	0	41	0
Bacteria_Actinobacteriota_Actinobacteria_Pseudonocardiales_Pseudonocardiaceae_Actinosynnema	0	0	0	0	0	0	0	0	0	0	0	0	0	0	0	0	0	0	0	0	0	0	0	0	0	0	0	0	0	0	0	0	0	0	0	0	0	139	107	0	0	108	74	0	0	0	0	207	81
Bacteria_Actinobacteriota_Actinobacteria_Pseudonocardiales_Pseudonocardiaceae_Amycolatopsis	892	900	1282	2265	699	1166	884	1282	1103	1195	663	724	1034	914	1744	1658	1040	667	454	457	462	467	1538	468	511	513	493	569	675	233	306	349	474	515	686	132	288	1338	1116	686	678	866	787	462	384	284	634	1536	837
Bacteria_Actinobacteriota_Actinobacteria_Pseudonocardiales_Pseudonocardiaceae_Bounagaea	0	35	0	0	0	0	0	0	0	0	0	0	0	0	0	0	0	0	0	0	0	0	20	0	0	0	0	0	0	0	0	0	0	0	0	0	0	88	22	0	0	0	0	0	0	12	28	15	0
Bacteria_Actinobacteriota_Actinobacteria_Pseudonocardiales_Pseudonocardiaceae_Crossiella	277	378	305	368	344	385	366	306	282	275	360	246	304	354	245	291	272	238	258	200	186	153	158	432	268	209	110	175	158	219	288	204	134	197	141	0	327	843	777	520	469	667	478	478	3116	1077	503	1066	532
Bacteria_Actinobacteriota_Actinobacteria_Pseudonocardiales_Pseudonocardiaceae_Halopolyspora	0	0	0	0	0	0	0	0	0	0	0	0	0	0	0	0	0	0	0	0	0	0	0	0	0	0	0	0	0	0	0	0	0	0	0	0	0	0	0	0	0	0	0	0	0	0	0	11	0
Bacteria_Actinobacteriota_Actinobacteria_Pseudonocardiales_Pseudonocardiaceae_Lechevalieria	0	0	0	0	0	0	0	0	0	80	0	0	0	0	0	59	0	0	134	206	141	71	0	0	160	191	0	0	0	0	64	279	0	0	0	96	228	582	554	318	249	368	259	124	129	90	358	631	297
Bacteria_Actinobacteriota_Actinobacteria_Pseudonocardiales_Pseudonocardiaceae_Longimycelium	0	0	0	0	0	0	0	0	0	0	0	0	0	0	0	0	0	0	0	0	0	0	0	0	0	0	0	0	0	0	0	0	0	0	0	0	0	0	0	0	0	0	0	0	0	0	0	0	0
Bacteria_Actinobacteriota_Actinobacteria_Pseudonocardiales_Pseudonocardiaceae_Prauserella	0	46	0	81	119	224	28	46	44	64	97	91	0	52	0	0	171	105	0	37	45	48	0	0	32	23	55	64	61	0	0	35	0	34	0	0	0	44	29	18	24	41	20	54	16	23	24	57	23
Bacteria_Actinobacteriota_Actinobacteria_Pseudonocardiales_Pseudonocardiaceae_Pseudonocardia	409	605	511	714	787	1124	417	532	679	899	1080	939	364	622	550	1280	937	681	385	429	740	701	890	670	519	495	643	855	508	323	368	482	655	724	688	523	465	1207	1244	816	710	1076	710	471	705	696	869	1684	876
Bacteria_Actinobacteriota_Actinobacteria_Pseudonocardiales_Pseudonocardiaceae_Saccharomonospora	22	23	39	0	95	0	26	35	39	0	77	0	28	0	65	49	300	0	34	32	54	71	59	0	22	49	33	50	43	0	30	45	43	57	44	0	75	219	186	139	115	173	157	133	111	67	137	237	131
Bacteria_Actinobacteriota_Actinobacteria_Pseudonocardiales_Pseudonocardiaceae_Saccharopolyspora	103	161	96	153	496	251	127	157	159	241	323	167	84	139	121	78	273	258	79	85	99	84	134	150	100	90	100	110	121	190	62	91	83	113	72	39	107	271	234	141	138	201	126	90	127	127	154	289	151
Bacteria_Actinobacteriota_Actinobacteria_Pseudonocardiales_Pseudonocardiaceae_Saccharothrix	0	0	0	0	0	0	0	0	0	0	0	0	0	0	0	66	0	0	0	0	0	0	104	376	0	0	0	0	0	81	0	0	0	0	385	212	0	103	71	49	39	64	49	21	20	32	42	71	47
Bacteria_Actinobacteriota_Actinobacteria_Pseudonocardiales_Pseudonocardiaceae_Thermocrispum	0	0	0	0	0	0	0	0	0	0	0	0	0	0	0	0	0	0	0	0	0	0	0	0	0	0	0	0	0	0	0	0	0	0	0	0	49	114	110	75	70	73	66	44	44	0	77	128	66
Bacteria_Actinobacteriota_Actinobacteria_Pseudonocardiales_Pseudonocardiaceae_Thermotunica	0	42	0	0	0	0	22	0	0	0	0	0	0	0	0	0	0	0	41	37	32	28	0	0	62	57	116	80	0	0	52	0	51	52	0	0	21	38	0	28	0	0	0	0	0	0	34	18	23
Bacteria_Actinobacteriota_Actinobacteria_Pseudonocardiales_Pseudonocardiaceae_Yuhushiella	0	0	0	0	0	226	0	0	0	0	0	0	0	0	0	0	0	0	0	24	0	0	0	0	0	0	0	0	0	0	0	0	0	0	0	0	0	0	0	0	0	0	0	0	0	0	14	0	0
Bacteria_Actinobacteriota_Actinobacteria_Streptomycetales_Streptomycetaceae_Kitasatospora	454	478	517	414	291	242	383	487	291	249	228	203	475	480	391	402	219	189	2069	1182	572	547	640	261	1367	975	294	282	482	263	1891	1989	275	263	604	519	513	1684	1731	1129	963	1224	1002	924	643	539	964	2414	1170
Bacteria_Actinobacteriota_Actinobacteria_Streptomycetales_Streptomycetaceae_Streptacidiphilus	0	0	39	50	0	0	0	37	57	53	0	0	0	0	34	113	0	0	0	39	0	38	0	0	0	0	0	0	0	0	44	0	0	0	0	0	39	36	58	0	0	0	0	0	24	0	0	48	46
Bacteria_Actinobacteriota_Actinobacteria_Streptomycetales_Streptomycetaceae_Streptomyces	8018	9740	8709	8617	7702	6336	8256	8886	8084	7241	6370	6618	7325	8893	7967	10676	8395	5486	8918	8013	8032	7182	9700	6774	7832	7048	6187	6769	6855	6125	7414	7089	7994	7059	7399	5211	8054	24165	22601	14045	14492	15404	12595	12717	9389	7236	14456	29841	15329
Bacteria_Actinobacteriota_Actinobacteria_Streptosporangiales_Nocardiopsaceae_Allonocardiopsis	19	26	0	0	0	0	0	20	0	0	0	0	0	18	0	0	0	0	0	0	24	29	0	0	0	0	25	0	0	0	0	0	45	28	45	46	0	0	0	0	0	0	0	0	0	0	0	0	0
Bacteria_Actinobacteriota_Actinobacteria_Streptosporangiales_Nocardiopsaceae_Allosalinactinospora	20	58	89	84	61	35	40	61	62	92	70	0	31	76	76	79	29	25	0	34	63	42	291	131	0	27	48	29	74	31	0	0	32	37	88	131	0	0	0	0	0	0	0	0	0	35	0	0	0
Bacteria_Actinobacteriota_Actinobacteria_Streptosporangiales_Nocardiopsaceae_Haloactinospora	18	0	16	18	0	0	25	19	0	0	0	0	0	0	17	20	0	0	38	34	30	0	0	0	31	32	0	0	0	0	30	35	0	0	0	0	0	0	0	0	0	0	0	0	0	0	0	0	0
Bacteria_Actinobacteriota_Actinobacteria_Streptosporangiales_Nocardiopsaceae_Lipingzhangella	0	0	0	0	0	0	0	0	0	0	0	0	0	0	0	0	0	0	0	0	0	0	0	0	0	0	0	0	0	0	0	0	0	0	0	0	0	0	0	0	0	0	0	0	0	0	0	0	0
Bacteria_Actinobacteriota_Actinobacteria_Streptosporangiales_Nocardiopsaceae_Nocardiopsis	186	208	191	222	231	139	187	168	217	151	172	137	154	190	194	367	182	123	95	124	170	140	199	273	156	157	158	153	139	225	90	155	141	121	131	117	315	1157	969	547	537	736	553	480	390	268	659	1136	684
Bacteria_Actinobacteriota_Actinobacteria_Streptosporangiales_Nocardiopsaceae_Salinactinospora	0	0	0	0	0	0	0	0	0	0	0	0	0	0	0	0	0	0	0	0	0	22	178	231	0	0	0	0	112	143	0	0	0	0	83	132	0	0	0	0	0	0	0	0	0	0	0	0	0
Bacteria_Actinobacteriota_Actinobacteria_Streptosporangiales_Nocardiopsaceae_Streptomonospora	0	0	19	30	23	0	0	0	18	0	16	20	0	19	0	63	0	22	0	20	0	0	26	16	0	18	0	0	17	0	0	0	19	22	0	0	0	32	50	31	52	91	37	31	15	0	30	40	34
Bacteria_Actinobacteriota_Actinobacteria_Streptosporangiales_Nocardiopsaceae_Thermobifida	31	46	78	56	63	55	0	34	39	69	78	50	40	33	46	42	73	50	45	41	41	54	33	0	50	78	33	62	37	0	50	92	81	42	0	56	0	43	27	0	18	25	0	20	22	21	39	50	0
Bacteria_Actinobacteriota_Actinobacteria_Streptosporangiales_Streptosporangiaceae_Herbidospora	0	0	0	0	0	0	0	0	0	0	0	0	0	0	0	0	0	0	0	0	0	0	0	0	0	0	0	0	0	29	0	0	0	0	0	0	0	0	0	0	0	0	0	0	0	0	0	0	0
Bacteria_Actinobacteriota_Actinobacteria_Streptosporangiales_Streptosporangiaceae_Microbispora	27	32	31	26	41	40	0	33	0	24	33	0	0	33	23	51	21	26	0	0	47	28	32	37	32	25	0	0	0	33	0	33	0	26	31	0	126	208	155	151	135	118	129	103	114	71	106	231	124
Bacteria_Actinobacteriota_Actinobacteria_Streptosporangiales_Streptosporangiaceae_Nonomuraea	665	382	216	183	256	135	586	339	229	209	93	100	656	545	203	196	100	77	378	359	174	201	250	96	257	232	162	154	90	49	293	255	143	222	163	84	116	357	410	254	271	319	259	175	149	97	222	492	284
Bacteria_Actinobacteriota_Actinobacteria_Streptosporangiales_Streptosporangiaceae_Planomonospora	0	36	0	36	0	0	0	0	0	0	0	0	0	0	26	0	0	0	0	28	106	84	102	0	0	0	60	132	0	0	0	0	170	124	0	0	0	28	0	0	0	0	0	0	0	0	0	26	0
Bacteria_Actinobacteriota_Actinobacteria_Streptosporangiales_Streptosporangiaceae_Sphaerisporangium	25	56	0	0	0	0	27	24	23	0	0	24	24	31	0	0	19	0	48	55	35	32	48	0	63	40	29	25	43	0	40	64	27	30	0	0	38	63	60	53	44	51	46	37	37	26	30	85	35
Bacteria_Actinobacteriota_Actinobacteria_Streptosporangiales_Streptosporangiaceae_Streptosporangium	223	276	252	310	352	418	155	231	278	222	450	790	154	263	212	281	561	328	150	249	334	307	471	451	322	297	267	218	302	208	254	235	228	298	484	412	227	479	444	437	292	388	357	241	181	167	281	636	324
Bacteria_Actinobacteriota_Actinobacteria_Streptosporangiales_Streptosporangiaceae_Thermopolyspora	0	0	0	0	0	0	0	0	0	0	0	0	0	0	0	23	0	0	0	0	17	16	0	0	0	17	0	0	0	0	17	30	0	0	0	0	0	0	17	0	19	14	0	0	0	0	0	0	0
Bacteria_Actinobacteriota_Actinobacteria_Streptosporangiales_Streptosporangiales Incertae Sedis_Motilibacter	0	0	0	0	0	0	0	0	0	0	0	0	0	0	0	0	0	0	0	0	0	0	0	0	0	0	0	0	0	0	0	0	0	0	0	0	49	146	162	99	101	137	73	44	60	0	99	244	133
Bacteria_Actinobacteriota_Actinobacteria_Streptosporangiales_Thermomonosporaceae_Actinoallomurus	36	26	0	0	0	0	40	0	0	0	0	0	0	29	0	0	0	0	0	0	0	0	0	0	0	0	0	0	0	0	0	0	0	0	0	0	35	115	64	37	0	40	0	16	26	29	68	90	28
Bacteria_Actinobacteriota_Actinobacteria_Streptosporangiales_Thermomonosporaceae_Actinocorallia	0	0	0	0	0	0	0	0	0	0	0	0	0	0	0	0	0	0	0	0	0	32	0	0	0	0	0	0	0	0	0	0	0	0	0	0	0	158	184	145	158	227	208	65	123	65	54	271	107
Bacteria_Actinobacteriota_Actinobacteria_Streptosporangiales_Thermomonosporaceae_Actinomadura	272	363	261	233	303	266	249	273	186	185	345	193	247	279	228	235	236	268	176	233	239	225	390	280	267	271	184	244	209	209	190	244	218	318	323	270	618	1361	1141	559	538	602	580	438	346	258	800	1560	711
Bacteria_Actinobacteriota_Actinobacteria_Streptosporangiales_Thermomonosporaceae_Spirillospora	0	0	0	0	0	0	0	0	0	0	0	0	0	0	0	0	0	0	0	0	192	253	322	0	0	0	178	251	225	67	0	0	218	286	76	92	0	0	0	0	0	80	45	251	311	55	0	0	0
Bacteria_Actinobacteriota_Actinobacteria_Streptosporangiales_Thermomonosporaceae_Thermobispora	312	414	77	64	26	0	230	213	155	56	35	21	236	276	91	86	44	20	855	737	575	394	99	84	742	730	915	1115	422	356	646	662	655	184	0	30	108	293	35	0	15	19	15	0	0	0	326	88	72
Bacteria_Actinobacteriota_Actinobacteria_Streptosporangiales_Thermomonosporaceae_Thermostaphylospora	0	0	0	0	0	0	0	0	0	0	0	0	0	0	0	0	0	0	0	0	0	0	0	0	0	0	0	0	0	0	0	0	0	0	0	0	0	58	58	48	35	56	44	35	16	0	40	76	53
Bacteria_Actinobacteriota_Actinobacteria_Streptosporangiales_Thermomonosporaceae_[Streptomyces] thermoautotrophicus	0	0	16	46	0	0	198	351	87	0	0	0	0	0	0	0	0	0	20	20	0	0	0	0	0	0	0	0	0	0	0	20	0	0	0	0	0	42	28	37	41	66	35	40	46	38	24	78	38
Bacteria_Actinobacteriota_Coriobacteriia_Coriobacteriales_Atopobiaceae_Atopobium	338	429	98	127	98	168	398	294	122	116	176	124	293	334	162	144	96	116	343	241	168	175	262	255	429	293	274	230	263	355	524	192	119	129	121	260	342	313	170	70	167	178	156	102	147	128	252	200	164
Bacteria_Actinobacteriota_Coriobacteriia_Coriobacteriales_Atopobiaceae_Coriobacteriaceae UCG-002	0	0	35	0	0	30	0	0	0	0	25	0	0	0	0	0	0	38	214	272	98	86	121	394	242	183	69	71	89	203	171	93	109	30	127	75	0	29	31	23	42	76	34	0	0	0	15	33	27
Bacteria_Actinobacteriota_Coriobacteriia_Coriobacteriales_Atopobiaceae_Coriobacteriaceae UCG-003	0	0	0	0	0	0	0	0	0	0	0	0	0	0	0	0	0	0	0	0	30	44	150	112	0	0	22	23	42	120	0	0	0	34	291	131	42	61	67	55	86	85	82	137	65	44	41	55	52
Bacteria_Actinobacteriota_Coriobacteriia_Coriobacteriales_Atopobiaceae_Libanicoccus	0	0	0	0	0	0	0	25	0	0	0	0	0	0	0	0	0	0	0	0	0	0	0	0	0	0	0	0	0	0	0	0	0	0	0	0	0	0	0	0	0	0	0	0	0	0	0	0	0
Bacteria_Actinobacteriota_Coriobacteriia_Coriobacteriales_Atopobiaceae_Olsenella	109	208	148	137	99	98	138	179	137	124	120	114	92	199	168	155	162	100	38	47	100	84	225	127	58	48	81	76	77	121	44	57	88	147	261	112	22	49	59	52	67	61	65	59	63	99	34	65	50
Bacteria_Actinobacteriota_Coriobacteriia_Coriobacteriales_Atopobiaceae_uncultured	27	37	32	32	23	18	33	29	18	22	0	0	24	35	29	0	20	0	0	0	0	0	0	0	0	0	0	0	0	0	0	0	0	0	19	0	29	19	0	0	0	0	0	0	0	0	11	11	0
Bacteria_Actinobacteriota_Coriobacteriia_Coriobacteriales_Coriobacteriaceae_Collinsella	584	905	759	790	776	549	755	787	673	741	726	503	513	892	849	878	531	594	576	682	721	599	681	608	609	633	633	628	552	503	501	446	825	560	524	391	121	257	306	131	206	209	189	276	374	416	179	274	183
Bacteria_Actinobacteriota_Coriobacteriia_Coriobacteriales_Coriobacteriaceae_Coriobacterium	26	25	0	0	0	0	24	0	0	0	0	27	29	0	0	0	0	0	0	0	45	0	46	304	0	0	38	51	47	0	0	0	34	34	39	55	0	0	0	0	0	0	0	0	0	0	0	0	0
Bacteria_Actinobacteriota_Coriobacteriia_Coriobacteriales_Coriobacteriaceae_Enorma	0	0	0	0	0	0	0	0	0	0	0	0	0	0	0	0	0	0	0	0	0	0	0	0	0	0	0	0	0	0	0	0	0	0	0	0	0	0	0	0	0	0	0	0	16	54	0	11	0
Bacteria_Actinobacteriota_Coriobacteriia_Coriobacteriales_Coriobacteriales Incertae Sedis_Phoenicibacter	175	532	604	632	373	613	253	376	397	288	427	399	162	479	478	396	328	741	55	95	137	157	295	312	81	61	166	161	166	194	48	39	119	167	263	217	41	160	103	37	75	76	51	68	80	118	98	99	59
Bacteria_Actinobacteriota_Coriobacteriia_Coriobacteriales_Coriobacteriales Incertae Sedis_Raoultibacter	90	171	35	59	78	26	99	115	0	45	73	0	99	101	0	50	45	42	40	0	0	0	0	24	22	25	38	73	0	31	0	23	0	0	0	0	170	220	43	53	70	56	58	125	59	0	143	59	46
Bacteria_Actinobacteriota_Coriobacteriia_Coriobacteriales_Coriobacteriales Incertae Sedis_uncultured	1109	1760	365	455	380	476	1338	1411	672	388	357	461	989	1734	595	324	348	370	397	644	961	843	553	419	590	530	763	792	587	339	352	294	1680	1436	628	1034	138	674	842	585	540	399	358	164	182	151	341	789	835
Bacteria_Actinobacteriota_Coriobacteriia_Coriobacteriales_Eggerthellaceae_Adlercreutzia	0	0	0	56	109	46	0	0	54	55	140	0	0	0	0	77	107	0	0	0	0	0	0	0	0	0	0	0	42	0	0	0	64	75	0	0	0	0	0	0	0	0	0	0	0	0	0	0	0
Bacteria_Actinobacteriota_Coriobacteriia_Coriobacteriales_Eggerthellaceae_CHKCI002	0	0	0	0	0	0	0	0	0	0	0	0	0	0	0	0	0	0	0	0	0	0	0	0	0	0	0	0	0	0	0	0	0	0	0	0	0	0	0	0	0	0	0	0	0	0	0	0	0
Bacteria_Actinobacteriota_Coriobacteriia_Coriobacteriales_Eggerthellaceae_Cryptobacterium	0	0	0	0	0	0	0	0	0	0	0	0	0	0	0	0	0	0	0	0	0	0	0	0	0	0	0	0	0	0	0	0	0	0	0	0	0	0	0	0	0	0	0	0	0	0	0	0	0
Bacteria_Actinobacteriota_Coriobacteriia_Coriobacteriales_Eggerthellaceae_DNF00809	0	0	0	0	0	26	0	0	0	0	35	96	0	0	0	0	0	23	0	0	0	0	75	0	0	0	0	0	23	0	0	0	0	0	31	81	10	0	0	0	0	0	0	12	0	0	10	0	0
Bacteria_Actinobacteriota_Coriobacteriia_Coriobacteriales_Eggerthellaceae_Denitrobacterium	0	0	0	0	0	0	0	0	0	0	0	0	0	0	0	0	0	0	0	0	0	0	0	0	0	0	24	0	0	0	0	0	0	0	0	0	98	217	46	0	24	0	0	0	0	0	87	79	24
Bacteria_Actinobacteriota_Coriobacteriia_Coriobacteriales_Eggerthellaceae_Eggerthella	192	450	0	0	0	0	349	262	0	0	0	0	181	259	0	0	0	0	0	43	0	0	0	0	143	61	33	0	69	0	87	0	0	0	0	0	0	28	34	0	30	30	22	0	0	0	26	40	35
Bacteria_Actinobacteriota_Coriobacteriia_Coriobacteriales_Eggerthellaceae_Enterorhabdus	169	179	217	240	203	179	121	151	167	191	268	173	124	191	155	297	158	199	105	169	109	96	265	194	72	118	123	127	121	204	62	83	143	98	218	139	44	104	117	87	81	92	105	116	140	112	43	112	91
Bacteria_Actinobacteriota_Coriobacteriia_Coriobacteriales_Eggerthellaceae_Gordonibacter	255	592	54	72	71	0	392	312	47	68	39	0	203	408	107	103	23	19	101	91	72	46	33	78	86	69	49	96	40	133	86	51	34	21	47	126	17	21	51	15	29	20	19	0	0	0	12	47	0
Bacteria_Actinobacteriota_Coriobacteriia_Coriobacteriales_Eggerthellaceae_Senegalimassilia	0	0	0	0	0	0	0	0	0	0	0	21	0	0	0	0	0	0	0	0	0	0	0	0	0	0	0	0	0	0	0	0	0	0	0	0	0	0	0	0	0	23	0	0	0	0	12	0	0
Bacteria_Actinobacteriota_Coriobacteriia_Coriobacteriales_Eggerthellaceae_Slackia	42	51	73	77	70	58	32	37	57	65	76	104	27	53	79	117	75	92	62	73	70	55	75	103	26	68	46	67	52	93	24	48	84	70	107	58	19	44	75	41	50	53	77	76	83	91	34	72	46
Bacteria_Actinobacteriota_Coriobacteriia_Coriobacteriales_Eggerthellaceae_uncultured	442	257	55	125	124	80	303	164	112	132	119	94	418	166	94	113	75	117	161	53	83	105	123	83	129	65	56	63	61	94	147	45	112	141	123	66	51	625	241	74	133	112	111	110	172	90	272	427	129
Bacteria_Actinobacteriota_Rubrobacteria_Rubrobacterales_Rubrobacteriaceae_Rubrobacter	1188	1760	1512	1837	3239	2088	1250	1467	1944	1628	2540	2945	1027	1682	1592	1765	3302	2831	1482	2506	3721	3691	2960	2281	1511	2002	3110	3731	1999	1926	1124	1630	4019	4632	3167	1758	850	1039	1064	616	936	877	837	800	1168	969	727	888	763
Bacteria_Actinobacteriota_Thermoleophilia_Gaiellales_Gaiellaceae_Gaiella	1490	1475	1314	1222	1796	739	1208	1351	1261	1437	1640	944	1304	1429	1214	1377	1399	811	4760	5097	3793	2789	1679	1254	5817	6920	3127	3892	2012	1786	3671	6369	4124	1307	645	490	2063	8332	9283	7271	8322	11079	10634	6996	14295	17750	5270	13293	7041
Bacteria_Actinobacteriota_Thermoleophilia_Solirubrobacterales_Solirubrobacteraceae_Conexibacter	813	762	676	472	1253	1072	698	755	437	576	1035	858	861	673	641	607	1105	738	506	717	664	582	786	548	577	548	507	656	446	379	500	576	613	607	651	342	3106	10509	10269	11145	13521	18443	19383	10694	18761	6242	6344	16516	9185
Bacteria_Actinobacteriota_Thermoleophilia_Solirubrobacterales_Solirubrobacteraceae_JCM 18997	0	0	0	0	0	0	0	0	0	0	0	0	0	0	0	0	0	0	0	0	0	0	0	0	0	0	0	0	0	0	0	0	0	0	0	0	0	0	0	0	0	0	0	0	0	0	0	0	0
Bacteria_Actinobacteriota_Thermoleophilia_Solirubrobacterales_Solirubrobacteraceae_Parviterribacter	188	117	0	0	0	0	85	105	46	0	0	0	118	60	0	55	0	0	0	0	0	0	150	0	0	0	0	0	0	52	0	0	0	0	201	212	45	240	242	214	241	340	346	241	365	92	155	424	189
Bacteria_Actinobacteriota_Thermoleophilia_Solirubrobacterales_Solirubrobacteraceae_Patulibacter	32	37	0	42	189	1202	52	48	35	63	277	780	34	34	0	0	0	671	39	102	181	214	102	36	81	127	150	126	82	32	92	82	252	202	81	0	29	51	45	36	36	61	51	40	46	56	33	43	38
Bacteria_Actinobacteriota_Thermoleophilia_Solirubrobacterales_Solirubrobacteraceae_Solirubrobacter	806	1053	1072	1593	969	495	625	905	1224	1234	668	1096	655	992	1189	1220	692	751	566	668	796	849	439	470	656	540	974	779	560	365	622	415	527	777	285	396	649	3244	3264	3371	4072	5499	4843	3542	6140	4735	1685	5990	2891
Bacteria_Actinobacteriota_Thermoleophilia_Solirubrobacterales_Solirubrobacteraceae_uncultured	58	159	179	192	189	45	80	157	204	144	127	31	69	144	182	172	452	0	70	64	45	54	43	0	105	57	31	31	184	51	143	89	65	0	0	0	29	73	100	66	67	74	53	58	55	32	41	112	58
Bacteria_Actinobacteriota_Thermoleophilia_Thermophilales_Thermoleophilaceae_Thermoleophilum	0	0	0	0	30	0	19	0	0	0	0	0	0	0	0	0	0	0	0	0	0	0	19	0	0	0	0	0	0	0	0	0	0	0	0	0	0	21	0	0	0	0	0	0	0	0	0	16	0
Bacteria_Aquificota_Aquificae_Aquificales_Aquificaceae_Hydrogenivirga	0	0	0	0	0	0	0	0	0	0	0	0	0	0	0	0	0	0	0	0	0	0	0	31	0	0	0	0	0	0	0	0	0	0	0	0	0	0	0	0	0	0	0	0	0	0	0	0	0
Bacteria_Aquificota_Aquificae_Aquificales_Aquificaceae_Hydrogenobacter	35	53	60	44	0	39	45	51	0	0	61	31	49	48	0	71	39	41	81	58	36	0	46	31	111	66	33	35	34	42	60	29	37	43	0	64	0	0	42	37	56	49	47	17	20	33	0	19	40
Bacteria_Aquificota_Aquificae_Aquificales_Aquificaceae_Thermocrinis	48	44	0	41	39	0	39	46	53	50	0	0	39	61	52	0	0	0	0	0	23	0	77	41	0	0	22	25	54	35	20	0	0	0	0	42	111	111	83	49	56	56	61	64	57	53	101	88	66
Bacteria_Aquificota_Aquificae_Aquificales_Aquificaceae_uncultured	20	21	15	0	0	0	21	30	0	0	0	0	0	19	0	0	0	0	0	0	0	0	31	17	0	0	0	0	0	0	0	0	0	0	47	0	0	10	0	0	0	0	0	0	0	0	13	0	0
Bacteria_Aquificota_Aquificae_Aquificales_Hydrogenobaculaceae_Hydrogenobaculum	79	160	54	74	87	71	124	129	86	64	64	75	73	145	78	65	66	67	26	35	45	32	42	80	43	32	42	34	40	69	28	36	26	25	60	35	46	34	28	11	12	14	24	13	15	11	26	36	27
Bacteria_Aquificota_Aquificae_Hydrogenothermales_Hydrogenothermaceae_Hydrogenothermus	0	32	19	22	15	0	19	32	17	0	0	0	16	26	0	26	16	0	0	16	0	0	0	0	0	0	0	0	0	0	0	0	0	0	0	0	0	12	28	11	13	24	17	0	16	0	13	22	13
Bacteria_Aquificota_Aquificae_Hydrogenothermales_Hydrogenothermaceae_Persephonella	0	0	0	0	0	0	0	0	0	0	0	0	0	0	0	0	0	0	0	0	0	0	0	0	0	0	0	0	0	19	0	0	0	0	0	0	0	0	0	0	0	0	0	0	0	0	0	0	0
Bacteria_Aquificota_Aquificae_Hydrogenothermales_Hydrogenothermaceae_Sulfurihydrogenibium	180	183	205	335	865	809	144	143	336	461	789	622	133	163	202	312	727	859	239	648	1203	1257	345	304	222	389	974	857	305	109	164	485	1580	2399	202	75	58	89	58	58	41	49	33	43	66	95	57	61	50
Bacteria_Aquificota_Aquificae_Hydrogenothermales_Hydrogenothermaceae_Venenivibrio	0	0	0	0	0	0	0	0	0	0	0	0	23	0	15	0	0	0	0	0	0	16	31	0	0	0	0	0	0	0	0	0	0	0	19	36	0	0	0	0	10	0	0	0	0	0	0	0	0
Bacteria_Aquificota_Aquificae_Hydrogenothermales_Hydrogenothermaceae_uncultured	16	36	90	119	0	0	30	49	61	80	0	0	0	45	77	137	0	0	0	0	0	0	0	0	0	0	0	0	0	0	0	0	0	0	0	0	0	15	0	0	0	0	0	0	0	0	0	0	0
Bacteria_Aquificota_Desulfurobacteriia_Desulfurobacteriales_Desulfurobacteriaceae_Balnearium	0	0	0	22	31	38	0	0	0	0	32	30	0	0	0	0	51	26	0	0	0	0	17	30	0	0	20	0	23	43	0	0	20	25	28	17	25	22	21	16	19	27	18	34	27	21	20	22	14
Bacteria_Aquificota_Desulfurobacteriia_Desulfurobacteriales_Desulfurobacteriaceae_Desulfurobacterium	636	566	109	145	180	103	524	401	182	143	93	81	382	452	161	104	234	136	131	208	47	44	0	0	285	180	82	41	38	30	124	137	31	22	0	0	42	411	213	58	64	25	13	15	0	20	197	366	81
Bacteria_Aquificota_Desulfurobacteriia_Desulfurobacteriales_Desulfurobacteriaceae_Phorcysia	21	17	23	0	0	0	0	0	18	0	0	0	0	20	0	0	0	0	0	0	0	0	0	0	0	0	0	0	0	0	0	0	0	0	0	0	0	0	0	0	0	0	0	0	0	0	0	0	0
Bacteria_Aquificota_Desulfurobacteriia_Desulfurobacteriales_Desulfurobacteriaceae_Thermovibrio	0	0	0	0	0	0	0	0	0	0	0	0	0	0	0	0	0	0	0	0	0	0	0	0	0	0	0	0	0	0	0	0	0	0	0	0	0	0	0	0	0	0	0	0	0	0	0	0	0
Bacteria_Armatimonadota_Armatimonadia_Armatimonadales_Armatimonadaceae_Armatimonas	2193	2097	839	1079	1005	0	1851	1458	1224	1304	770	0	1857	1705	900	963	1346	0	859	955	944	894	1651	1221	921	930	941	869	831	0	975	715	966	793	1608	1283	1156	2671	2176	1070	1870	2055	1847	2126	2801	2086	1532	1974	1284
Bacteria_Armatimonadota_Chthonomonadetes_Chthonomonadales_Chthonomonadaceae_Chthonomonas	1200	1716	1068	1418	2286	1622	1293	1433	1435	1586	2768	1697	952	1520	1242	1243	2164	1373	613	534	1072	1724	4110	7124	444	428	1161	1118	2538	5775	552	318	1351	2261	5390	3609	410	824	1079	734	1494	1834	1990	2854	2440	2013	505	793	798
Bacteria_Armatimonadota_Fimbriimonadia_Fimbriimonadales_Fimbriimonadaceae_Fimbriimonas	9628	7631	1296	1446	720	635	6068	4585	1959	1107	697	745	7213	6572	2290	1386	743	625	0	0	613	626	0	0	0	0	506	510	0	0	0	585	0	547	0	0	0	0	0	0	0	0	0	0	0	0	0	0	0
Bacteria_Bacteroidota_Bacteroidia_Bacteroidales_Bacteroidaceae_Bacteroides	10939	16334	6712	7599	6801	6361	12403	12829	9247	6192	7482	9579	11135	14185	6432	14342	7833	7179	13009	9891	11122	9824	9735	9140	10985	6661	8424	7373	7714	7101	15392	6592	10358	11162	8686	11762	14236	11404	9006	4854	7835	9130	8397	16018	11555	8322	9499	7565	7407
Bacteria_Bacteroidota_Bacteroidia_Bacteroidales_Barnesiellaceae_Barnesiella	82	103	38	49	0	0	71	65	112	0	0	0	64	110	0	82	0	0	55	49	115	101	0	71	61	0	63	74	89	83	65	47	158	154	61	0	940	174	162	92	146	191	244	297	366	231	271	180	164
Bacteria_Bacteroidota_Bacteroidia_Bacteroidales_Barnesiellaceae_Coprobacter	18	18	0	20	0	0	30	43	41	0	0	0	22	48	0	21	0	0	96	43	21	54	31	28	124	33	53	0	44	23	275	60	0	0	32	0	25	23	31	29	33	0	21	21	24	0	16	18	20
Bacteria_Bacteroidota_Bacteroidia_Bacteroidales_Barnesiellaceae_uncultured	195	223	35	45	24	0	197	134	82	38	0	0	149	170	53	46	32	0	248	192	78	80	39	29	352	156	56	48	95	35	335	99	53	26	35	0	161	128	76	54	41	62	49	58	55	28	104	66	70
Bacteria_Bacteroidota_Bacteroidia_Bacteroidales_Dysgonomonadaceae_Candidatus Armantifilum	275	282	131	165	58	26	226	209	202	115	67	25	200	222	119	110	75	37	285	147	98	90	132	71	237	96	138	60	130	58	557	82	69	81	65	60	1302	1032	208	69	86	131	126	97	86	75	1528	365	210
Bacteria_Bacteroidota_Bacteroidia_Bacteroidales_Dysgonomonadaceae_Candidatus Azobacteroides	102	59	25	38	0	21	78	52	40	17	0	0	102	96	39	53	0	17	136	39	67	55	0	17	124	24	24	21	18	36	136	27	0	23	19	17	1495	203	153	76	112	92	117	62	49	47	381	123	140
Bacteria_Bacteroidota_Bacteroidia_Bacteroidales_Dysgonomonadaceae_Candidatus Symbiothrix	329	683	209	279	125	97	321	297	255	268	136	67	284	269	282	208	93	58	167	927	307	874	53	62	261	133	285	134	197	35	99	69	193	209	23	41	106	107	70	238	75	76	120	146	56	36	93	60	93
Bacteria_Bacteroidota_Bacteroidia_Bacteroidales_Dysgonomonadaceae_Dysgonomonas	806	1679	477	532	206	116	1157	1443	982	284	213	115	824	1974	453	473	369	149	788	418	377	398	1589	564	805	347	435	204	689	506	1068	221	305	317	737	1062	3606	1738	1111	537	866	975	924	637	450	312	1444	837	940
Bacteria_Bacteroidota_Bacteroidia_Bacteroidales_Dysgonomonadaceae_Fermentimonas	397	639	489	655	522	390	574	639	740	394	552	967	302	606	447	483	486	518	571	757	757	730	811	1006	909	557	663	831	656	682	630	523	798	1030	1253	729	468	482	639	264	485	582	556	650	570	330	351	365	416
Bacteria_Bacteroidota_Bacteroidia_Bacteroidales_Dysgonomonadaceae_Petrimonas	324	551	587	557	0	0	417	473	403	108	0	0	297	460	271	176	0	0	1292	685	178	126	62	0	794	417	155	85	313	69	870	457	101	0	0	61	163	290	180	92	126	145	104	91	87	49	167	230	205
Bacteria_Bacteroidota_Bacteroidia_Bacteroidales_Dysgonomonadaceae_Proteiniphilum	758	1710	1008	1366	1153	1030	865	1336	2224	897	1291	1476	758	1592	1202	1017	1284	1276	689	717	1493	1928	3842	1799	732	572	1668	1770	1186	836	684	552	788	1874	2458	999	2008	2183	2155	1170	1724	1620	1508	1791	1552	1171	1428	1281	1610
Bacteria_Bacteroidota_Bacteroidia_Bacteroidales_Dysgonomonadaceae_uncultured	495	498	256	322	192	132	427	496	410	201	161	137	526	519	302	379	152	146	568	409	352	203	1169	289	553	383	290	242	269	177	591	251	303	371	1137	176	1128	975	857	487	747	805	625	345	309	170	816	927	627
Bacteria_Bacteroidota_Bacteroidia_Bacteroidales_Marinifilaceae_Butyricimonas	148	235	148	157	131	156	181	174	255	150	137	227	129	191	147	86	108	152	262	43	78	91	125	97	203	38	32	0	115	235	648	35	0	28	67	41	180	519	860	733	1052	1077	1085	2031	2308	1360	255	554	821
Bacteria_Bacteroidota_Bacteroidia_Bacteroidales_Marinifilaceae_Marinifilum	6770	10247	3301	3403	1197	461	9745	11124	9487	3971	37205	1134	6812	10662	4014	3168	1286	537	15401	5888	4666	5454	1671	5057	6296	2861	1957	1000	2669	1277	9405	4002	888	776	646	518	9057	41311	84035	628077	42717	6906	17676	12203	7626	23506	10262	24776	151668
Bacteria_Bacteroidota_Bacteroidia_Bacteroidales_Marinifilaceae_Odoribacter	1973	2957	2676	2804	567	308	1844	2716	3325	1141	369	212	1410	2430	1937	1727	559	311	2157	2351	1059	840	590	953	1912	1358	850	561	849	1272	2341	1704	828	545	500	602	3019	3110	2527	1433	1660	1791	1663	1337	1379	738	2224	1877	1853
Bacteria_Bacteroidota_Bacteroidia_Bacteroidales_Marinifilaceae_Sanguibacteroides	19	40	0	0	0	0	40	44	17	0	0	0	49	40	0	19	0	0	75	15	38	15	39	0	40	21	38	24	0	15	30	0	0	0	0	0	233	54	50	23	33	44	33	23	32	16	87	29	27
Bacteria_Bacteroidota_Bacteroidia_Bacteroidales_Marinifilaceae_uncultured	15188	34627	5938	7947	1708	2302	24264	28529	27306	4800	5788	3799	15155	36517	6503	6118	1752	1917	18518	7496	6853	6957	2897	3353	17405	5919	4965	2276	5527	2371	25253	4474	2273	1369	1050	1233	13809	5358	2729	1126	2444	1809	1751	1563	1267	928	5921	2162	2034
Bacteria_Bacteroidota_Bacteroidia_Bacteroidales_Marinilabiliaceae_Alkaliflexus	86	153	107	125	146	138	121	151	164	88	111	75	84	163	126	248	90	83	134	158	143	144	133	345	155	111	140	104	170	200	157	136	170	234	220	193	67	97	131	258	97	97	103	76	371	168	72	91	121
Bacteria_Bacteroidota_Bacteroidia_Bacteroidales_Marinilabiliaceae_Alkalitalea	0	0	0	0	0	0	0	0	0	62	0	0	0	0	0	0	0	0	0	0	0	0	0	0	0	0	0	0	0	0	0	0	0	0	0	0	0	47	48	43	253	357	325	0	0	0	35	81	92
Bacteria_Bacteroidota_Bacteroidia_Bacteroidales_Marinilabiliaceae_Anaerophaga	984	2680	318	372	134	93	1682	1437	1127	211	144	130	997	1833	568	372	164	93	1202	538	409	433	419	512	1922	997	1967	471	701	523	1871	440	279	301	234	359	5747	3281	1683	667	334	438	425	5894	485	296	2669	1631	1009
Bacteria_Bacteroidota_Bacteroidia_Bacteroidales_Marinilabiliaceae_Carboxylicivirga	11425	36551	23227	27981	4222	496	25275	49840	55749	17903	2579	1343	10671	41597	14113	16689	3555	633	21293	10580	5767	9809	1741	988	16796	12277	16534	13385	14226	2746	25533	8536	8389	957	313	406	5640	9075	7705	4807	7136	5413	5565	17054	3911	1103	5812	4348	4514
Bacteria_Bacteroidota_Bacteroidia_Bacteroidales_Marinilabiliaceae_Labilibacter	5417	18978	17882	25109	602	185	17383	26506	58503	6442	777	465	5730	27217	9642	11940	833	305	5461	2164	990	820	394	235	5139	3435	2037	816	1829	457	9726	2382	625	162	104	167	2848	2953	1800	461	328	367	302	10047	310	107	1799	1135	870
Bacteria_Bacteroidota_Bacteroidia_Bacteroidales_Marinilabiliaceae_Mangroviflexus	0	38	0	27	0	0	37	35	51	0	0	0	25	92	0	37	0	0	41	25	67	0	0	0	57	37	37	0	28	0	58	25	0	30	23	0	74	206	141	113	84	80	115	91	174	47	83	85	103
Bacteria_Bacteroidota_Bacteroidia_Bacteroidales_Marinilabiliaceae_Marinilabilia	306	726	164	209	0	0	585	630	427	311	0	0	351	818	182	191	58	0	185	108	83	125	30	33	451	126	232	229	73	0	182	56	103	94	0	28	91	214	124	186	52	49	122	200	62	0	65	64	48
Bacteria_Bacteroidota_Bacteroidia_Bacteroidales_Marinilabiliaceae_Ruminofilibacter	0	33	0	0	0	0	0	41	35	0	0	0	34	0	0	0	0	0	0	36	0	0	0	0	42	0	0	0	0	0	0	0	0	0	0	0	152	124	130	47	91	118	152	169	88	60	107	103	91
Bacteria_Bacteroidota_Bacteroidia_Bacteroidales_Marinilabiliaceae_Saccharicrinis	941	1362	649	846	1900	1021	917	1306	2630	1304	2145	755	705	1639	661	1177	2603	1184	1935	2054	2457	2493	478	276	1937	1516	2130	1578	955	260	1997	1608	2717	3476	609	260	704	422	260	68	236	182	78	4455	190	0	335	191	129
Bacteria_Bacteroidota_Bacteroidia_Bacteroidales_Marinilabiliaceae_Thermophagus	0	21	0	0	0	0	0	0	27	19	0	0	0	0	0	33	0	0	0	0	0	0	17	34	23	0	0	0	0	0	0	0	0	0	0	0	29	52	18	0	0	0	0	0	0	0	42	19	0
Bacteria_Bacteroidota_Bacteroidia_Bacteroidales_Marinilabiliaceae_[Cytophaga] xylanolytica group	821	2111	1503	2273	2045	429	1514	2187	2927	2229	1822	235	969	2184	1574	1844	3278	319	963	1219	852	823	124	139	1570	1128	1558	1001	755	258	775	769	856	1026	22	79	401	1013	478	1118	244	236	414	7393	114	60	312	291	302
Bacteria_Bacteroidota_Bacteroidia_Bacteroidales_Marinilabiliaceae_uncultured	24297	63144	54416	69816	26892	17379	39744	63204	80857	65823	23988	20137	23607	67366	49047	56397	32849	15568	59974	51032	43427	45308	173033	251005	63311	57500	59848	43006	130048	149132	52642	39672	44695	45365	150985	192014	72527	115055	121797	71043	106996	111358	116955	113367	95854	32942	62216	83647	80354
Bacteria_Bacteroidota_Bacteroidia_Bacteroidales_Muribaculaceae_Muribaculum	2063	2905	0	0	0	0	2191	2407	0	0	0	0	1918	2693	0	0	0	0	0	0	0	0	0	0	0	0	0	0	0	0	0	0	0	0	0	0	0	0	0	2224	0	0	0	3508	0	0	0	0	0
Bacteria_Bacteroidota_Bacteroidia_Bacteroidales_Paludibacteraceae_F0058	341	844	344	662	523	134	579	685	718	1068	216	103	420	800	547	788	481	102	275	341	204	309	251	125	263	227	186	166	157	127	244	183	204	153	461	97	938	414	195	107	112	126	100	160	126	88	483	193	199
Bacteria_Bacteroidota_Bacteroidia_Bacteroidales_Paludibacteraceae_H1	252	165	110	124	0	0	227	140	327	571	0	0	272	222	70	71	28	0	167	164	38	35	42	29	244	127	108	62	95	57	146	66	55	0	21	0	292	277	134	72	23	17	16	63	19	0	182	134	74
Bacteria_Bacteroidota_Bacteroidia_Bacteroidales_Paludibacteraceae_Microbacter	138	112	25	34	0	0	139	106	69	0	0	0	91	99	19	20	0	0	43	22	0	0	0	0	43	0	0	0	0	0	56	0	0	0	0	0	769	85	57	13	22	20	24	17	29	19	144	41	45
Bacteria_Bacteroidota_Bacteroidia_Bacteroidales_Paludibacteraceae_Paludibacter	1583	2193	638	791	476	293	2200	1597	771	494	653	228	1844	2484	655	776	628	457	1073	659	563	897	661	406	1179	617	645	475	641	296	1224	474	569	850	409	500	10978	4664	5218	28068	11912	13174	5376	5230	5679	1560	4725	3265	6460
Bacteria_Bacteroidota_Bacteroidia_Bacteroidales_Paludibacteraceae_uncultured	1306	3141	759	895	303	269	2154	2205	2042	620	1079	487	1456	3329	847	758	462	374	3190	2222	1764	1602	1111	704	3161	1522	1452	1005	1310	657	5490	1491	1761	2103	879	790	10832	3771	2882	6130	2129	1874	1732	4391	2871	651	3487	2523	2662
Bacteria_Bacteroidota_Bacteroidia_Bacteroidales_Porphyromonadaceae_Porphyromonas	1230	1759	1072	1264	993	590	1381	1454	1797	3762	948	518	1064	1648	1010	1196	1348	538	1131	831	957	1011	922	1307	1678	909	1259	1279	1137	1189	1486	688	798	955	1142	917	2315	1750	1450	1069	1391	1472	1355	1321	1224	870	1539	1282	1280
Bacteria_Bacteroidota_Bacteroidia_Bacteroidales_Prevotellaceae_Alloprevotella	642	894	286	429	383	255	606	496	455	527	382	252	675	684	352	438	304	283	434	472	452	555	1046	1242	563	387	437	371	606	1054	530	261	419	816	715	1496	2280	930	799	358	549	508	536	535	449	320	981	494	525
Bacteria_Bacteroidota_Bacteroidia_Bacteroidales_Prevotellaceae_Paraprevotella	0	0	0	0	0	0	0	0	0	0	0	0	0	0	0	0	0	0	0	0	0	0	0	0	0	0	0	0	0	0	0	0	0	0	0	0	0	24	31	30	0	27	0	0	0	0	0	0	0
Bacteria_Bacteroidota_Bacteroidia_Bacteroidales_Prevotellaceae_Prevotella	2527	3674	2090	2585	2303	1693	2537	2390	2179	2040	2104	1225	2081	2931	2081	2481	1886	1388	2594	3058	2008	1947	2359	2392	2591	1821	2059	1841	1742	3382	3193	2154	2160	2459	2610	2223	2864	3419	3699	2591	3182	3137	2952	3261	3330	2420	2213	2735	3010
Bacteria_Bacteroidota_Bacteroidia_Bacteroidales_Prevotellaceae_Prevotella_7	534	1019	288	470	267	124	871	703	490	311	463	225	465	806	321	407	225	163	918	245	321	813	243	228	225	158	221	270	444	202	255	152	257	220	193	140	333	341	355	258	205	235	238	289	232	285	286	224	335
Bacteria_Bacteroidota_Bacteroidia_Bacteroidales_Prevotellaceae_Prevotella_9	1268	2123	1275	1574	1974	3329	1528	2044	1974	1405	2397	6174	1219	2005	1465	1783	2374	3909	1765	1888	1657	1888	2919	3176	1592	1351	2025	1827	1743	2373	2078	1370	1541	2885	3557	3774	1738	1836	2128	1381	1625	1858	1680	2151	2172	1996	1589	1444	1495
Bacteria_Bacteroidota_Bacteroidia_Bacteroidales_Prevotellaceae_Prevotellaceae Ga6A1 group	44	67	31	44	0	0	52	76	84	48	30	0	51	103	25	0	79	0	49	59	0	45	29	0	42	70	0	0	0	0	40	28	0	36	0	0	86	70	102	33	40	50	28	58	51	43	46	62	56
Bacteria_Bacteroidota_Bacteroidia_Bacteroidales_Prevotellaceae_Prevotellaceae NK3B31 group	138	42	0	0	42	0	68	33	0	0	35	0	143	40	0	0	0	0	0	0	47	34	60	68	0	0	0	0	28	71	0	0	40	0	54	116	80	177	146	129	39	71	50	32	35	29	90	137	96
Bacteria_Bacteroidota_Bacteroidia_Bacteroidales_Prevotellaceae_Prevotellaceae UCG-001	548	1448	288	660	217	159	1329	1002	649	362	154	125	423	1067	277	377	228	187	261	293	292	174	192	115	248	257	190	203	152	98	189	182	339	205	218	171	113	242	390	231	327	234	249	231	162	211	152	234	311
Bacteria_Bacteroidota_Bacteroidia_Bacteroidales_Prevotellaceae_Prevotellaceae UCG-003	305	315	171	162	113	47	255	205	225	116	93	23	212	295	100	127	112	34	154	176	211	154	40	28	424	235	157	174	136	0	242	142	155	150	0	0	56	74	73	33	43	51	46	41	39	52	31	44	53
Bacteria_Bacteroidota_Bacteroidia_Bacteroidales_Prevotellaceae_Prevotellaceae UCG-004	541	510	355	646	256	81	469	346	551	604	314	127	450	471	471	873	284	107	143	172	242	283	2005	2517	144	125	256	250	508	744	126	89	181	344	5348	3954	98	151	97	41	89	89	69	92	112	113	65	120	89
Bacteria_Bacteroidota_Bacteroidia_Bacteroidales_Prevotellaceae_uncultured	242	384	307	274	243	233	246	338	248	216	166	137	181	267	248	103	90	161	200	233	789	1156	188	152	229	273	734	908	246	116	186	203	463	1527	244	95	110	111	142	43	92	121	84	113	54	40	81	56	75
Bacteria_Bacteroidota_Bacteroidia_Bacteroidales_Prolixibacteraceae_BSV13	1378	1615	384	393	373	276	1647	1249	772	372	317	558	1374	1668	401	504	449	232	930	899	499	519	5164	8110	1081	782	550	393	1676	5562	1459	652	524	664	3300	9491	1550	1389	1186	1144	898	903	922	1787	1901	3036	963	821	1032
Bacteria_Bacteroidota_Bacteroidia_Bacteroidales_Prolixibacteraceae_Draconibacterium	39220	59973	49334	60056	10956	1751	46749	64769	152657	45130	7000	1779	30897	53388	44171	39907	14438	2863	94516	62609	27542	24010	5950	3017	68807	38831	22984	12210	26816	3386	95954	57880	13640	6865	1542	1187	20999	43281	41077	22454	23040	14892	11573	11306	4649	2009	22199	30904	28519
Bacteria_Bacteroidota_Bacteroidia_Bacteroidales_Prolixibacteraceae_Mangrovibacterium	27	33	0	32	0	0	0	27	38	0	0	0	0	28	0	0	0	0	48	0	30	0	0	0	38	36	0	0	0	0	59	0	0	34	108	0	102	92	58	23	25	27	0	22	0	0	77	57	25
Bacteria_Bacteroidota_Bacteroidia_Bacteroidales_Prolixibacteraceae_Mariniphaga	66	88	45	61	67	154	72	95	83	30	127	184	69	103	38	47	115	197	175	136	82	44	239	149	155	102	106	47	249	52	168	102	56	78	108	0	691	474	426	123	204	261	225	218	192	143	322	304	258
Bacteria_Bacteroidota_Bacteroidia_Bacteroidales_Prolixibacteraceae_Meniscus	354	593	116	245	182	77	406	410	253	442	101	64	530	619	145	219	140	59	360	255	780	1002	3193	4263	1127	413	2368	2788	1942	2976	307	112	855	698	2348	5003	380	704	709	231	406	325	231	111	146	125	436	382	363
Bacteria_Bacteroidota_Bacteroidia_Bacteroidales_Prolixibacteraceae_Prolixibacter	1481	2747	3538	4945	10777	4073	1980	2809	5842	6347	11457	3217	1310	2987	5379	5042	11329	3483	501	368	747	1265	237	257	448	321	805	412	300	190	1165	296	306	346	187	93	1252	1729	1450	811	1129	1264	1345	956	511	340	1365	1039	1118
Bacteria_Bacteroidota_Bacteroidia_Bacteroidales_Prolixibacteraceae_Roseimarinus	4690	10131	1511	1858	463	377	9693	9393	5513	1503	535	511	4452	14708	2586	1443	700	448	3422	2028	1815	1466	1245	1278	4943	2182	2459	1481	1785	683	4805	1525	1197	848	933	637	19314	14883	11569	2901	3720	3747	3921	6306	1535	945	11504	7576	6473
Bacteria_Bacteroidota_Bacteroidia_Bacteroidales_Prolixibacteraceae_Sunxiuqinia	629	1482	889	378	132	68	855	1134	701	254	149	358	586	1578	527	297	228	134	11908	11390	6839	3909	1497	1082	5939	6215	4647	3176	2624	697	8586	7490	6261	4249	300	831	2578	1857	1688	1390	4287	762	454	648	371	311	1318	817	1170
Bacteria_Bacteroidota_Bacteroidia_Bacteroidales_Prolixibacteraceae_Tangfeifania	1154	762	366	334	123	110	715	743	1228	192	153	76	734	709	318	274	162	59	855	891	420	339	216	329	792	497	309	232	404	247	905	772	335	414	197	288	3406	10376	9366	4757	4313	3070	2226	1414	1041	568	4962	7135	7160
Bacteria_Bacteroidota_Bacteroidia_Bacteroidales_Prolixibacteraceae_WCHB1-32	3394	5903	2020	2479	10697	1860	4045	4854	4687	3648	3898	1736	3161	5755	2598	2832	3361	2825	6685	4780	3522	3500	3002	4163	6689	3435	3596	2633	2947	3200	8376	3354	5679	3659	2524	3724	16151	18195	13610	12841	14239	10698	15063	15164	10816	7598	14965	10024	10879
Bacteria_Bacteroidota_Bacteroidia_Bacteroidales_Prolixibacteraceae_uncultured	6400	12070	7134	8896	5253	4815	7894	10217	16141	5989	6420	6335	6419	11918	6414	7018	6798	6043	38860	42303	16430	14620	10840	9132	32119	25135	11874	9067	15161	7551	31470	28544	11792	7397	6516	8852	60626	168576	180014	74152	110298	107298	90380	41600	37055	33061	81572	124360	122450
Bacteria_Bacteroidota_Bacteroidia_Bacteroidales_Rikenellaceae_Alistipes	4536	6211	4026	4440	2860	2590	4299	4909	4639	3678	3261	2713	3605	5299	3664	4231	2896	2610	4130	4510	3202	3233	2882	3387	5275	3374	3310	2837	2713	2699	3821	2972	4596	3751	2832	2517	4083	4559	3925	2278	3057	3308	2710	2873	2672	2092	3132	3043	3050
Bacteria_Bacteroidota_Bacteroidia_Bacteroidales_Rikenellaceae_Anaerocella	79	42	19	0	0	0	73	28	26	0	0	0	96	49	0	0	0	0	30	0	0	22	0	0	50	0	0	0	21	0	57	0	0	24	0	0	168	146	99	38	20	26	41	63	51	18	100	74	51
Bacteria_Bacteroidota_Bacteroidia_Bacteroidales_Rikenellaceae_Bact-08	0	0	0	0	0	0	0	0	0	0	54	0	0	0	0	59	0	0	0	0	0	0	172	68	47	0	0	56	109	110	0	49	71	0	96	260	0	136	225	98	214	202	305	359	315	399	89	94	120
Bacteria_Bacteroidota_Bacteroidia_Bacteroidales_Rikenellaceae_DMER64	1401	3505	7988	9287	7922	796	2483	3492	6217	10199	5553	1252	1253	2704	6277	11811	4647	1203	708	963	1063	1252	3584	6266	509	555	802	810	1837	11497	584	453	1571	1617	3437	5532	827	615	576	346	467	672	597	1057	1906	1639	485	478	459
Bacteria_Bacteroidota_Bacteroidia_Bacteroidales_Rikenellaceae_M2PB4-61 termite group	615	1257	1273	1626	605	154	816	1157	1528	1162	370	104	693	1333	1252	1506	762	148	787	541	277	509	1510	523	629	329	349	302	797	389	725	385	144	338	1953	312	888	1193	1592	915	761	620	480	580	653	738	1037	1414	754
Bacteria_Bacteroidota_Bacteroidia_Bacteroidales_Rikenellaceae_Mucinivorans	216	101	0	0	0	0	126	78	31	0	19	22	189	113	0	0	0	0	21	0	0	20	97	78	0	0	0	0	26	52	16	0	21	0	48	64	17	21	22	0	16	16	12	0	17	26	0	23	19
Bacteria_Bacteroidota_Bacteroidia_Bacteroidales_Rikenellaceae_Rikenella	1931	2268	1297	1617	232	37	1622	2135	2333	495	578	41	1396	2385	966	840	92	81	2803	433	376	441	145	92	689	231	183	111	337	69	1009	237	71	43	23	34	985	275	218	153	180	137	154	138	149	135	351	151	157
Bacteria_Bacteroidota_Bacteroidia_Bacteroidales_Rikenellaceae_Rikenellaceae RC9 gut group	5569	7742	5473	6314	10935	14097	6537	6776	6240	5765	12681	14866	5372	6663	5068	5409	9968	10614	6955	6785	7403	8232	26428	8282	6306	4990	7620	8648	12846	6288	7860	5864	6835	7736	20514	10049	5777	4904	5204	4465	4831	4963	4963	4286	4524	3105	3751	3742	4404
Bacteria_Bacteroidota_Bacteroidia_Bacteroidales_Rikenellaceae_S50 wastewater-sludge group	142	97	0	0	0	0	43	79	0	0	0	0	96	94	0	0	0	0	0	0	0	0	0	0	0	0	0	0	0	0	0	0	0	0	0	0	0	0	0	0	0	0	0	0	0	0	0	0	0
Bacteria_Bacteroidota_Bacteroidia_Bacteroidales_Rikenellaceae_SP3-e08	80	65	0	0	0	0	0	82	0	0	0	0	0	0	0	0	0	0	0	0	0	0	0	0	0	0	0	84	0	0	0	0	0	0	118	0	0	84	0	35	0	0	0	0	0	0	0	0	70
Bacteria_Bacteroidota_Bacteroidia_Bacteroidales_Rikenellaceae_U29-B03	115	79	24	29	0	0	81	59	47	20	0	0	104	66	21	25	0	0	67	20	34	25	0	0	46	0	0	0	0	0	109	0	0	0	55	0	118	54	35	18	36	43	30	36	46	37	64	52	35
Bacteria_Bacteroidota_Bacteroidia_Bacteroidales_Rikenellaceae_dgA-11 gut group	131	516	249	258	24	0	250	390	280	105	23	0	187	413	275	258	25	0	371	206	92	61	0	26	355	196	124	44	134	32	548	122	33	31	27	29	389	193	196	86	93	115	98	218	373	228	186	163	127
Bacteria_Bacteroidota_Bacteroidia_Bacteroidales_Rikenellaceae_hoa5-07d05 gut group	68	25	0	0	0	0	74	24	0	0	0	0	65	35	0	0	0	0	83	85	0	25	27	0	71	46	27	0	24	0	205	36	0	0	0	0	30	58	43	64	33	25	29	26	34	0	22	35	56
Bacteria_Bacteroidota_Bacteroidia_Bacteroidales_Rikenellaceae_uncultured	1234	2045	2100	1796	1270	998	1498	2089	1660	1210	1230	945	1167	2048	1805	1849	1594	1056	1351	1346	1205	1096	1501	1787	1237	978	995	1074	1050	1538	1195	797	1307	1696	1431	2046	2013	1824	1361	962	993	1069	1097	1307	1314	1105	1653	1044	1062
Bacteria_Bacteroidota_Bacteroidia_Bacteroidales_Rs-E47 termite group_GWE2-42-42	1245	1795	1149	1238	1181	1310	1441	1304	1411	1413	1237	1057	1150	1724	1056	1307	873	1077	5961	6649	3261	2777	3315	2335	5327	4199	2329	1546	2861	1570	4605	4737	2600	1850	1573	2879	3174	2669	2190	1006	2134	2426	2203	2089	2015	1934	2117	1690	1586
Bacteria_Bacteroidota_Bacteroidia_Bacteroidales_Salinivirgaceae_Salinivirga	380	615	303	332	114	56	423	507	415	141	88	72	412	669	285	338	128	45	569	264	158	137	92	206	238	165	223	95	151	139	381	189	89	164	107	127	248	260	176	116	159	183	197	196	177	133	176	154	145
Bacteria_Bacteroidota_Bacteroidia_Bacteroidales_Salinivirgaceae_uncultured	3000	4539	894	913	832	856	8697	5427	1760	1189	893	1157	4239	4270	1120	1224	736	922	2715	1536	2016	2349	2871	3835	2723	1439	1980	1536	1840	1726	3228	1019	2318	3001	3009	3815	1301	1281	1094	686	824	908	785	909	548	495	850	801	937
Bacteria_Bacteroidota_Bacteroidia_Bacteroidales_Tannerellaceae_Candidatus Vestibaculum	179	265	111	158	181	443	188	205	260	251	162	986	200	435	134	145	287	459	216	156	67	105	228	162	210	156	114	66	192	153	262	107	107	98	74	184	388	726	277	190	175	216	320	330	529	215	511	558	256
Bacteria_Bacteroidota_Bacteroidia_Bacteroidales_Tannerellaceae_Macellibacteroides	2682	1405	436	513	0	118	348	334	283	144	108	0	216	482	305	340	146	0	971	600	369	309	211	208	497	344	254	325	123	183	806	635	733	254	142	0	139	561	987	476	405	372	201	154	260	94	161	504	757
Bacteria_Bacteroidota_Bacteroidia_Bacteroidales_Tannerellaceae_Parabacteroides	1934	2075	1014	1277	1060	738	1619	1603	1413	917	1411	1095	1724	1839	1067	1317	1100	921	1906	1571	2031	1826	885	1247	2173	1100	1566	1477	928	822	2816	979	2000	1866	817	880	3525	2836	2245	1022	1997	2085	2331	2316	2683	1966	2559	1900	1726
Bacteria_Bacteroidota_Bacteroidia_Bacteroidales_Tannerellaceae_Tannerella	205	365	71	70	27	44	290	250	166	58	62	0	196	317	52	106	50	0	210	137	111	113	111	194	315	121	94	84	105	112	206	90	69	71	98	127	1043	390	152	64	134	164	176	132	124	110	353	156	161
Bacteria_Bacteroidota_Bacteroidia_Bacteroidales_Tannerellaceae_uncultured	0	0	0	0	0	0	0	0	0	0	0	0	29	0	0	0	0	0	0	0	0	0	0	0	0	0	0	0	0	37	0	0	0	0	0	0	18	61	27	25	0	0	0	37	0	0	60	34	16
Bacteria_Bacteroidota_Bacteroidia_Bacteroidales_Williamwhitmaniaceae_Acetobacteroides	17	0	19	21	0	0	22	24	0	26	0	0	29	27	22	22	0	0	50	69	24	16	26	22	100	78	24	15	29	29	28	59	19	21	30	0	39	36	20	13	11	17	27	25	24	29	37	15	38
Bacteria_Bacteroidota_Bacteroidia_Bacteroidales_Williamwhitmaniaceae_BCf9-17 termite group	90	171	90	132	17	0	151	220	150	46	0	0	71	166	60	75	0	26	147	89	113	185	300	148	153	96	146	115	180	97	275	43	106	110	171	115	148	114	46	28	54	69	77	70	45	34	128	35	30
Bacteria_Bacteroidota_Bacteroidia_Bacteroidales_Williamwhitmaniaceae_Blvii28 wastewater-sludge group	426	1089	99	152	69	68	528	597	466	175	82	52	349	690	109	133	170	82	210	212	182	164	176	317	255	155	191	155	147	215	336	127	210	178	170	240	2954	9631	9169	10605	19080	19855	19854	43321	25335	9034	5551	6038	8091
Bacteria_Bacteroidota_Bacteroidia_Bacteroidales_Williamwhitmaniaceae_Rs-D38 termite group	85	73	40	52	128	64	91	48	63	59	139	72	65	79	29	52	72	126	120	72	41	43	263	281	95	58	71	60	130	168	104	38	51	32	347	313	46	38	43	35	23	35	35	57	106	70	43	36	25
Bacteria_Bacteroidota_Bacteroidia_Bacteroidales_Williamwhitmaniaceae_Williamwhitmania	18	78	38	44	0	0	40	81	122	41	0	0	0	68	57	92	0	0	0	0	0	0	0	0	0	0	0	0	0	0	45	0	0	0	0	0	0	20	0	16	19	15	27	46	36	0	13	0	0
Bacteria_Bacteroidota_Bacteroidia_Bacteroidales_Williamwhitmaniaceae_uncultured	0	0	0	0	0	0	0	0	0	0	0	0	0	0	0	26	0	0	0	0	0	0	0	0	0	0	0	0	0	0	21	0	0	0	0	0	105	36	27	11	18	20	20	28	31	28	46	13	26
Bacteria_Bacteroidota_Bacteroidia_Chitinophagales_Chitinophagaceae_Arachidicoccus	25	49	53	43	0	48	45	50	40	0	64	49	0	87	39	0	45	78	31	52	59	103	114	0	38	66	137	151	60	0	59	28	56	44	0	0	0	0	0	15	0	0	0	0	0	0	0	0	0
Bacteria_Bacteroidota_Bacteroidia_Chitinophagales_Chitinophagaceae_Asinibacterium	56	40	0	38	0	0	32	50	0	0	0	0	30	46	0	0	0	0	0	0	0	0	46	0	0	0	0	0	0	0	0	0	0	0	68	0	0	0	0	0	0	25	0	18	0	39	0	0	19
Bacteria_Bacteroidota_Bacteroidia_Chitinophagales_Chitinophagaceae_Aurantisolimonas	632	929	341	377	214	176	764	762	312	234	173	133	488	792	399	338	171	148	254	195	217	182	163	137	322	193	180	181	199	126	553	137	150	131	111	72	343	318	271	577	187	171	153	143	89	93	199	220	218
Bacteria_Bacteroidota_Bacteroidia_Chitinophagales_Chitinophagaceae_Chitinophaga	226	424	97	88	91	153	305	345	122	64	88	145	195	425	117	95	90	89	88	130	73	74	71	33	159	98	73	79	111	38	125	61	44	49	86	32	845	299	145	49	35	34	15	29	21	30	339	161	86
Bacteria_Bacteroidota_Bacteroidia_Chitinophagales_Chitinophagaceae_Cnuella	351	400	268	264	21	0	324	303	200	93	0	0	302	432	265	231	35	0	72	67	29	0	0	0	89	43	25	0	41	33	85	59	0	0	0	0	90	170	92	24	26	21	12	14	61	51	92	97	76
Bacteria_Bacteroidota_Bacteroidia_Chitinophagales_Chitinophagaceae_Dinghuibacter	679	566	213	256	101	80	605	473	293	382	86	107	565	616	270	176	80	93	251	199	152	144	974	2617	267	169	159	165	202	242	319	130	124	139	570	4470	641	2354	2697	1509	2524	2950	2953	2111	2314	1596	1052	2499	1473
Bacteria_Bacteroidota_Bacteroidia_Chitinophagales_Chitinophagaceae_Edaphobaculum	840	943	402	404	144	119	730	610	411	270	123	128	731	978	373	471	105	82	419	300	191	211	243	486	588	285	225	138	245	165	615	252	147	156	251	198	920	949	366	164	134	195	161	133	108	71	932	386	260
Bacteria_Bacteroidota_Bacteroidia_Chitinophagales_Chitinophagaceae_Ferruginibacter	1143	1253	565	646	331	262	1077	1286	1065	385	270	236	1013	1200	368	476	301	227	591	261	250	320	360	318	749	309	242	243	372	314	1014	230	156	247	366	299	3032	7126	3364	1242	1527	1416	1105	1000	937	1125	4954	3804	1815
Bacteria_Bacteroidota_Bacteroidia_Chitinophagales_Chitinophagaceae_Filimonas	32	23	35	23	34	0	30	43	0	37	0	0	38	47	27	30	0	0	135	176	140	176	61	79	81	107	133	91	63	0	122	117	226	174	107	0	135	83	192	110	210	205	194	351	500	281	95	139	126
Bacteria_Bacteroidota_Bacteroidia_Chitinophagales_Chitinophagaceae_Filobacterium	0	17	0	0	0	0	0	0	0	0	0	15	49	16	0	0	0	0	44	23	0	0	0	0	36	18	16	0	20	0	119	15	0	0	0	0	258	306	214	77	150	86	105	64	34	26	255	147	98
Bacteria_Bacteroidota_Bacteroidia_Chitinophagales_Chitinophagaceae_Flaviaesturariibacter	0	25	0	0	0	27	0	0	0	0	0	28	0	0	0	35	0	0	0	0	0	0	0	0	25	27	0	0	0	0	0	0	0	0	0	0	19	32	42	21	17	14	13	0	0	0	29	39	14
Bacteria_Bacteroidota_Bacteroidia_Chitinophagales_Chitinophagaceae_Flavihumibacter	0	0	0	0	0	0	0	0	0	0	0	0	0	0	0	0	0	0	0	0	0	0	0	0	0	0	0	0	0	0	0	0	0	0	0	0	0	28	0	0	0	0	0	0	0	0	0	0	0
Bacteria_Bacteroidota_Bacteroidia_Chitinophagales_Chitinophagaceae_Flavisolibacter	771	822	545	474	274	179	727	723	391	361	194	159	643	993	463	481	219	150	429	427	252	188	193	188	471	302	288	188	280	187	510	304	189	185	159	224	355	524	384	146	250	274	244	540	551	334	378	415	294
Bacteria_Bacteroidota_Bacteroidia_Chitinophagales_Chitinophagaceae_Flavitalea	177	167	34	0	0	0	99	54	61	0	0	0	150	155	0	84	0	0	573	247	80	103	0	0	235	141	80	37	279	0	437	142	0	0	0	0	794	797	191	48	70	45	30	29	0	0	663	209	129
Bacteria_Bacteroidota_Bacteroidia_Chitinophagales_Chitinophagaceae_Haoranjiania	20	0	0	0	0	0	20	17	0	0	0	0	0	0	0	0	0	0	0	19	22	17	0	0	40	0	25	0	19	0	58	0	0	0	0	0	15	68	30	0	11	13	19	0	0	0	45	34	16
Bacteria_Bacteroidota_Bacteroidia_Chitinophagales_Chitinophagaceae_Heliimonas	0	0	0	0	0	0	0	0	0	0	0	0	0	0	0	0	0	0	0	0	0	0	0	0	21	0	0	0	0	0	0	0	0	0	0	0	67	200	200	63	46	28	15	0	0	0	161	126	81
Bacteria_Bacteroidota_Bacteroidia_Chitinophagales_Chitinophagaceae_Hydrotalea	0	0	0	0	0	0	0	0	0	0	0	0	0	0	0	0	0	0	0	0	0	0	0	0	24	0	0	0	0	0	0	0	0	0	0	0	0	0	0	0	14	0	0	0	23	18	0	0	0
Bacteria_Bacteroidota_Bacteroidia_Chitinophagales_Chitinophagaceae_Lacibacter	26	40	41	49	22	41	44	61	66	56	63	65	23	27	50	85	95	69	264	408	125	97	0	0	212	252	97	65	100	57	239	267	378	99	52	0	61	124	64	46	21	44	64	15	21	0	48	88	35
Bacteria_Bacteroidota_Bacteroidia_Chitinophagales_Chitinophagaceae_Niabella	374	214	55	0	0	0	294	125	24	0	0	0	319	210	25	49	0	0	36	22	0	24	0	0	33	21	0	0	23	0	52	0	0	0	0	0	32	37	27	16	24	31	17	0	15	21	27	22	20
Bacteria_Bacteroidota_Bacteroidia_Chitinophagales_Chitinophagaceae_Niastella	110	77	0	0	0	0	70	51	0	0	0	0	84	74	0	0	0	0	99	65	0	0	0	0	79	40	0	0	0	0	91	30	0	0	0	0	41	45	33	0	24	38	16	0	22	23	17	23	0
Bacteria_Bacteroidota_Bacteroidia_Chitinophagales_Chitinophagaceae_Parafilimonas	0	0	0	0	0	0	0	0	0	0	0	0	0	0	0	0	0	0	0	0	0	0	0	0	0	0	0	0	0	0	0	0	0	0	0	0	34	37	0	0	0	17	0	21	0	18	28	0	0
Bacteria_Bacteroidota_Bacteroidia_Chitinophagales_Chitinophagaceae_Parasediminibacterium	633	162	0	0	0	0	424	117	23	0	0	0	400	165	0	0	0	0	0	0	0	0	0	0	0	0	0	0	0	0	0	0	0	0	0	0	0	0	0	0	0	0	0	0	0	0	0	0	0
Bacteria_Bacteroidota_Bacteroidia_Chitinophagales_Chitinophagaceae_Parasegetibacter	31	0	0	0	0	0	28	0	0	0	0	0	0	0	0	0	0	0	0	0	0	0	0	0	0	0	0	0	0	0	0	0	0	0	0	0	229	135	18	0	17	0	0	0	0	0	170	47	19
Bacteria_Bacteroidota_Bacteroidia_Chitinophagales_Chitinophagaceae_Pseudoflavitalea	0	0	0	0	0	0	0	0	0	31	0	0	0	0	0	0	0	0	66	49	0	0	0	0	51	27	0	0	0	0	41	0	0	0	0	0	48	103	71	70	0	0	0	0	0	0	65	91	51
Bacteria_Bacteroidota_Bacteroidia_Chitinophagales_Chitinophagaceae_Puia	162	201	0	50	30	26	123	136	39	27	36	42	199	185	65	55	0	0	102	49	58	41	48	83	75	60	46	33	46	33	146	66	53	33	66	0	312	444	242	193	137	136	145	209	134	147	314	199	116
Bacteria_Bacteroidota_Bacteroidia_Chitinophagales_Chitinophagaceae_Rurimicrobium	54	36	0	0	0	0	62	26	0	0	0	0	47	30	0	20	0	0	21	21	0	0	0	0	0	19	0	0	20	0	0	0	0	0	0	0	37	17	0	0	0	0	0	0	0	0	35	0	0
Bacteria_Bacteroidota_Bacteroidia_Chitinophagales_Chitinophagaceae_Sediminibacterium	782	693	142	136	91	70	508	486	264	132	96	34	607	458	215	116	96	60	185	205	93	68	45	51	252	112	78	68	113	188	342	121	70	65	105	56	254	252	174	102	102	139	168	138	122	74	153	203	99
Bacteria_Bacteroidota_Bacteroidia_Chitinophagales_Chitinophagaceae_Segetibacter	195	197	142	154	179	145	152	201	184	194	142	99	133	205	153	193	140	115	90	151	161	110	93	99	143	76	109	176	112	122	167	88	452	204	78	46	189	289	236	197	261	267	259	289	360	436	210	176	168
Bacteria_Bacteroidota_Bacteroidia_Chitinophagales_Chitinophagaceae_Taibaiella	525	449	149	169	90	53	385	313	205	105	115	44	373	458	139	210	59	59	343	199	176	198	127	101	393	177	164	107	209	131	441	164	192	138	153	41	794	494	280	132	193	151	168	172	110	146	490	297	221
Bacteria_Bacteroidota_Bacteroidia_Chitinophagales_Chitinophagaceae_Terrimonas	469	616	489	601	582	178	569	463	568	523	487	171	391	560	444	619	361	211	382	320	240	212	348	249	421	247	225	251	157	205	416	157	370	282	243	243	1042	2013	886	235	183	268	205	152	202	337	1211	810	309
Bacteria_Bacteroidota_Bacteroidia_Chitinophagales_Chitinophagaceae_UTBCD1	159	177	72	109	24	26	132	129	94	59	0	0	132	208	69	59	0	0	1111	400	225	201	88	34	1066	351	193	42	276	68	1288	318	0	0	0	0	24	51	51	0	0	17	15	38	139	347	52	38	19
Bacteria_Bacteroidota_Bacteroidia_Chitinophagales_Chitinophagaceae_Vibrionimonas	81	111	117	118	170	124	79	122	114	110	84	68	82	95	116	84	137	96	82	83	75	68	43	33	113	100	129	101	137	76	76	53	41	70	47	0	61	62	87	32	30	32	22	53	44	36	40	53	39
Bacteria_Bacteroidota_Bacteroidia_Chitinophagales_Chitinophagaceae_uncultured	2498	3145	1102	1184	795	798	2824	3210	2554	885	955	832	2118	3086	1115	1245	689	672	1470	1173	895	919	1282	911	1433	866	1135	844	1103	641	2278	829	730	912	682	584	2792	4009	1868	749	854	834	745	683	1356	2529	2764	1936	1087
Bacteria_Bacteroidota_Bacteroidia_Chitinophagales_Saprospiraceae_Aureispira	18574	8964	190	167	86	21	12821	6458	561	463	132	116	24024	10530	427	152	106	178	1729	420	865	491	658	37	3002	654	229	66	650	41	4287	197	85	40	24	21	2200	685	425	144	150	158	128	93	105	52	1069	498	273
Bacteria_Bacteroidota_Bacteroidia_Chitinophagales_Saprospiraceae_Candidatus Aquirestis	180	163	44	42	0	0	136	146	57	31	20	21	138	136	48	40	27	0	265	184	90	52	51	45	230	143	64	43	52	22	356	136	74	42	25	0	3291	735	530	725	466	237	236	124	125	70	874	909	538
Bacteria_Bacteroidota_Bacteroidia_Chitinophagales_Saprospiraceae_Haliscomenobacter	497	433	135	166	122	134	340	298	191	136	81	101	354	365	157	217	84	88	528	479	328	304	172	112	769	602	284	232	289	139	693	401	177	175	104	32	237	294	173	85	102	110	88	78	72	50	244	200	127
Bacteria_Bacteroidota_Bacteroidia_Chitinophagales_Saprospiraceae_Lewinella	16186	13254	2049	2303	1088	676	12926	9348	3303	2063	879	568	13465	12135	3367	2453	1167	906	18823	11138	5250	4100	2231	1603	35407	16071	9055	4418	10554	2877	56050	7614	2929	1003	833	665	14880	14024	9682	4916	4749	4771	4267	4703	7217	9860	11738	8365	6869
Bacteria_Bacteroidota_Bacteroidia_Chitinophagales_Saprospiraceae_Membranicola	1106	1120	169	145	63	31	1052	777	230	150	64	45	1019	979	270	185	51	45	675	334	314	290	256	182	952	451	316	286	391	96	994	229	144	520	177	50	170	445	453	148	104	83	74	70	139	120	296	402	290
Bacteria_Bacteroidota_Bacteroidia_Chitinophagales_Saprospiraceae_OLB8	249	274	117	186	34	0	232	268	222	161	0	17	169	328	139	141	43	0	1106	696	302	189	39	57	753	668	130	95	180	28	887	697	119	36	0	33	441	675	555	862	892	764	820	999	765	226	376	537	741
Bacteria_Bacteroidota_Bacteroidia_Chitinophagales_Saprospiraceae_Phaeodactylibacter	7774	6365	1575	1681	1981	2657	6176	4580	2224	1547	4680	3836	6394	6124	2159	1854	1489	2150	7530	6770	3624	3018	2274	1025	10037	6133	3969	3018	3989	1098	8439	4486	3332	2786	1349	677	4431	13552	12875	5985	8050	9136	6652	3803	4060	3294	7503	11330	9448
Bacteria_Bacteroidota_Bacteroidia_Chitinophagales_Saprospiraceae_Portibacter	18456	19483	11330	11517	2281	706	17327	16383	10901	7450	1674	736	15215	17812	10584	9336	3695	1118	20954	19151	6594	4347	1210	792	24670	14759	7193	4346	7330	891	17805	15058	4844	2050	260	261	7199	18009	15330	7026	7908	7322	5248	3531	4399	4850	11802	13476	10676
Bacteria_Bacteroidota_Bacteroidia_Chitinophagales_Saprospiraceae_Rubidimonas	1307	893	86	109	26	0	1036	756	151	77	30	34	1227	1024	181	66	38	22	1202	562	743	623	152	57	2844	1063	628	376	568	167	4337	329	246	256	18	30	897	351	102	51	30	42	33	68	40	34	432	176	94
Bacteria_Bacteroidota_Bacteroidia_Chitinophagales_Saprospiraceae_Saprospira	701	389	27	17	15	0	438	227	51	39	0	17	590	406	51	0	27	0	5774	1214	2409	2188	1223	165	10369	1522	380	90	723	184	14226	280	170	85	34	93	198	63	471	11	24	40	24	17	0	20	75	223	57
Bacteria_Bacteroidota_Bacteroidia_Chitinophagales_Saprospiraceae_uncultured	98301	84697	23097	22374	7537	4607	82391	64630	29278	14717	5370	5217	81459	81714	29200	20628	8395	5370	93487	48435	28315	24140	12370	7186	136791	51070	25902	13634	35914	8639	168561	29297	10103	7283	5595	6180	65356	111955	72062	25065	25665	25770	19360	12813	12123	11761	73635	69705	39295
Bacteria_Bacteroidota_Bacteroidia_Cytophagales_Amoebophilaceae_Candidatus Amoebophilus	5159	2692	963	868	1035	548	3100	1832	970	748	1089	547	3770	2422	828	768	975	662	4062	2306	1089	730	249	329	3008	1739	852	427	921	107	3124	1189	281	178	135	130	1118	1342	1515	587	729	989	852	959	685	325	968	1040	854
Bacteria_Bacteroidota_Bacteroidia_Cytophagales_Amoebophilaceae_Candidatus Cardinium	1132	483	142	215	169	75	463	332	210	163	90	0	844	414	155	273	0	164	44	41	36	60	342	0	50	0	51	72	125	100	67	31	86	0	91	133	106	110	69	40	32	34	34	30	0	0	71	108	25
Bacteria_Bacteroidota_Bacteroidia_Cytophagales_Amoebophilaceae_Candidatus Paenicardinium	186	128	0	30	0	0	104	77	31	23	0	0	155	112	0	51	0	0	0	0	0	0	0	0	32	0	0	0	0	0	0	0	0	0	0	0	43	55	31	16	37	29	0	0	0	0	47	32	49
Bacteria_Bacteroidota_Bacteroidia_Cytophagales_Amoebophilaceae_uncultured	56680	30132	15470	19640	23010	16511	34942	24208	16464	17694	21904	11127	45843	26976	16673	17433	27582	18918	1389	1075	630	531	762	1210	1517	890	623	459	783	616	1607	546	581	455	414	522	886	614	347	211	339	408	470	255	175	205	769	335	289
Bacteria_Bacteroidota_Bacteroidia_Cytophagales_Bernardetiaceae_Bernardetia	87	16	0	0	0	0	49	0	0	0	0	0	55	48	0	0	0	0	115	26	47	47	16	0	154	20	0	0	0	0	217	0	0	0	0	0	4398	95	15	16	34	42	41	56	13	0	524	74	114
Bacteria_Bacteroidota_Bacteroidia_Cytophagales_Bernardetiaceae_Garritya	540	526	22	18	0	0	277	118	30	18	0	0	440	132	0	0	0	0	0	0	42	33	39	0	18	0	17	46	35	18	43	0	65	51	0	0	137	95	22	0	21	31	64	127	149	16	121	31	17
Bacteria_Bacteroidota_Bacteroidia_Cytophagales_Bernardetiaceae_Hugenholtzia	66	88	16	24	0	0	83	57	15	0	0	0	76	95	0	0	0	0	73	56	16	15	0	24	82	43	27	0	0	0	42	26	0	0	0	0	452	54	47	31	28	47	33	25	0	0	74	33	44
Bacteria_Bacteroidota_Bacteroidia_Cytophagales_Bernardetiaceae_uncultured	86	85	0	0	0	0	72	41	0	0	0	0	56	57	0	0	0	0	0	22	0	0	0	0	16	0	0	0	0	0	0	0	0	0	0	0	1392	51	12	16	32	28	31	0	0	0	393	22	47
Bacteria_Bacteroidota_Bacteroidia_Cytophagales_Cyclobacteriaceae_Algoriphagus	1840	1065	143	132	81	75	1225	606	187	156	68	55	1833	1035	141	188	64	75	1652	681	341	278	145	125	1457	613	380	160	576	49	1763	567	185	127	90	94	13914	40817	16225	11332	7549	3999	2403	1763	895	1098	26604	25506	12246
Bacteria_Bacteroidota_Bacteroidia_Cytophagales_Cyclobacteriaceae_Aquiflexum	86	32	0	0	0	0	37	0	0	0	0	0	38	25	0	0	0	0	0	0	0	0	0	0	0	0	0	0	0	0	0	0	0	0	0	0	335	1040	722	221	63	40	20	48	0	0	474	567	236
Bacteria_Bacteroidota_Bacteroidia_Cytophagales_Cyclobacteriaceae_Aureibacter	0	0	0	0	0	0	0	0	0	0	0	0	0	0	0	0	0	0	0	0	0	0	0	0	0	0	0	0	0	0	0	0	0	0	0	0	0	0	0	0	0	14	0	0	0	0	0	0	0
Bacteria_Bacteroidota_Bacteroidia_Cytophagales_Cyclobacteriaceae_Belliella	175	71	0	0	0	0	89	47	45	0	0	0	183	112	0	0	0	0	135	0	52	46	0	0	106	38	0	0	0	0	244	0	0	0	0	0	534	95	31	18	0	0	0	0	0	0	109	36	27
Bacteria_Bacteroidota_Bacteroidia_Cytophagales_Cyclobacteriaceae_Catalinimonas	192	116	24	22	0	0	138	83	18	17	0	0	157	103	20	19	0	0	22	25	0	0	55	75	24	0	0	0	18	0	32	0	0	0	41	42	51	43	16	14	14	13	0	0	0	0	29	19	31
Bacteria_Bacteroidota_Bacteroidia_Cytophagales_Cyclobacteriaceae_Cecembia	77	42	0	0	0	0	93	60	0	0	0	0	104	40	0	0	0	0	0	0	0	0	0	0	0	0	0	0	0	0	0	0	0	0	0	0	0	0	0	0	0	0	0	0	0	0	0	0	0
Bacteria_Bacteroidota_Bacteroidia_Cytophagales_Cyclobacteriaceae_Cesiribacter	256	151	0	0	0	0	182	108	23	18	0	0	666	165	26	0	0	0	25	0	0	0	0	0	45	0	22	0	41	0	49	0	0	0	0	0	122	25	14	0	0	0	0	0	0	0	48	18	0
Bacteria_Bacteroidota_Bacteroidia_Cytophagales_Cyclobacteriaceae_Cyclobacterium	189	129	19	37	0	0	355	158	48	33	0	0	156	127	45	25	0	0	61	41	36	28	0	0	97	53	28	0	34	0	157	39	0	0	0	0	241	157	86	34	31	46	28	33	14	0	136	80	62
Bacteria_Bacteroidota_Bacteroidia_Cytophagales_Cyclobacteriaceae_Echinicola	215	220	152	104	17	0	206	172	135	58	0	0	219	218	109	54	18	0	20	0	0	0	0	0	25	0	0	0	32	0	33	0	0	0	0	0	27	64	42	16	20	18	14	31	0	12	34	42	24
Bacteria_Bacteroidota_Bacteroidia_Cytophagales_Cyclobacteriaceae_Ekhidna	19819	14843	1281	1204	238	97	13431	9455	2518	901	143	210	16457	18482	2480	988	277	163	2486	972	695	547	278	119	3689	1267	746	468	1004	326	3071	754	403	298	134	88	1940	1812	1494	523	439	312	208	146	87	90	1330	1058	985
Bacteria_Bacteroidota_Bacteroidia_Cytophagales_Cyclobacteriaceae_Fabibacter	4126	2278	272	339	75	22	2583	1456	485	342	47	65	3726	2003	433	361	48	44	863	465	243	235	71	37	1348	470	230	129	321	54	1513	264	135	51	0	23	434	396	154	85	115	123	132	234	103	34	357	178	110
Bacteria_Bacteroidota_Bacteroidia_Cytophagales_Cyclobacteriaceae_Fontibacter	42	52	0	0	0	0	27	0	0	0	0	0	47	31	0	0	0	0	0	0	0	0	0	0	0	0	0	0	25	0	37	0	0	0	0	0	0	0	0	0	0	0	0	0	0	0	0	0	0
Bacteria_Bacteroidota_Bacteroidia_Cytophagales_Cyclobacteriaceae_Fulvitalea	0	0	0	0	0	0	0	0	0	0	0	0	0	0	0	0	0	0	0	0	0	0	0	0	0	0	0	0	0	0	0	0	0	0	0	0	23	0	14	0	0	0	0	0	0	0	12	0	0
Bacteria_Bacteroidota_Bacteroidia_Cytophagales_Cyclobacteriaceae_Fulvivirga	17509	12019	720	600	125	57	11984	7192	1653	585	115	104	14676	9790	1424	618	131	112	2408	1669	648	470	195	206	2676	1278	611	323	1211	244	2905	1201	388	107	61	89	1945	1304	691	222	220	259	186	229	132	100	1219	830	506
Bacteria_Bacteroidota_Bacteroidia_Cytophagales_Cyclobacteriaceae_Imperialibacter	1184	844	142	163	76	53	868	609	236	88	80	83	954	845	193	103	97	45	212	170	267	333	477	102	410	153	188	206	137	81	367	104	116	297	254	131	856	656	244	123	162	158	123	69	37	78	656	306	228
Bacteria_Bacteroidota_Bacteroidia_Cytophagales_Cyclobacteriaceae_Indibacter	168	147	36	48	0	0	177	121	47	0	0	0	176	119	32	0	0	0	0	0	0	0	0	0	0	0	0	0	0	0	0	0	0	0	0	0	105	173	127	52	22	17	18	0	0	0	98	146	54
Bacteria_Bacteroidota_Bacteroidia_Cytophagales_Cyclobacteriaceae_Lunatimonas	381	223	0	0	0	0	315	149	0	0	0	0	344	187	0	0	0	0	0	0	0	0	0	0	0	0	0	0	0	0	0	0	0	0	0	0	17	0	0	0	0	0	0	0	0	0	0	0	0
Bacteria_Bacteroidota_Bacteroidia_Cytophagales_Cyclobacteriaceae_Mariniradius	30	28	0	0	0	0	21	16	19	0	17	0	28	18	20	16	33	0	19	0	0	0	0	0	22	0	0	0	0	0	16	0	0	0	0	0	25	13	0	0	0	0	0	0	0	0	14	0	0
Bacteria_Bacteroidota_Bacteroidia_Cytophagales_Cyclobacteriaceae_Marinoscillum	12024	8949	2009	2309	600	163	8609	6225	3452	1575	272	214	11085	7220	2139	1950	804	190	2896	2130	864	725	428	292	3739	1583	665	372	865	249	3360	1419	487	199	133	131	2606	1063	456	182	295	214	168	222	157	76	1203	502	439
Bacteria_Bacteroidota_Bacteroidia_Cytophagales_Cyclobacteriaceae_Marivirga	524	494	490	413	394	201	489	367	331	401	308	212	514	517	376	543	129	186	1210	578	175	140	37	33	498	232	127	44	369	0	787	369	60	0	0	0	293	93	49	21	12	27	18	0	24	0	109	34	45
Bacteria_Bacteroidota_Bacteroidia_Cytophagales_Cyclobacteriaceae_Mongoliicoccus	346	26	0	0	0	0	115	0	0	0	0	0	188	0	0	0	0	0	0	0	0	0	0	0	0	0	0	0	0	0	0	0	0	0	0	0	91	0	0	0	0	0	0	0	0	0	19	0	0
Bacteria_Bacteroidota_Bacteroidia_Cytophagales_Cyclobacteriaceae_Mongoliitalea	0	0	0	0	0	0	0	0	0	0	0	0	0	0	0	0	0	0	0	0	0	0	0	0	0	0	46	55	0	0	0	0	0	0	0	0	65	42	0	15	0	0	0	0	0	0	25	18	0
Bacteria_Bacteroidota_Bacteroidia_Cytophagales_Cyclobacteriaceae_Nafulsella	0	0	0	0	0	0	23	0	0	0	0	0	0	0	0	0	0	0	0	0	0	0	0	0	0	0	0	0	0	0	0	0	0	0	0	0	95	41	34	24	70	34	26	36	0	0	48	36	0
Bacteria_Bacteroidota_Bacteroidia_Cytophagales_Cyclobacteriaceae_Negadavirga	16	0	0	0	0	0	0	0	0	0	0	0	0	0	0	0	0	0	0	0	0	0	0	0	0	0	0	0	0	0	0	0	0	0	0	0	14	0	0	0	0	0	0	0	0	0	10	0	0
Bacteria_Bacteroidota_Bacteroidia_Cytophagales_Cyclobacteriaceae_Nitritalea	79	32	0	0	0	0	42	22	0	0	0	0	54	21	0	0	0	0	0	0	0	0	0	0	0	0	0	0	0	0	0	0	0	0	0	0	0	0	0	0	0	0	0	0	0	0	0	0	0
Bacteria_Bacteroidota_Bacteroidia_Cytophagales_Cyclobacteriaceae_Persicobacter	0	0	0	0	0	0	0	0	0	0	0	0	0	0	0	0	0	0	0	0	0	0	0	0	0	0	0	0	0	0	0	0	0	0	0	0	323	65	0	0	0	0	0	0	0	0	68	0	0
Bacteria_Bacteroidota_Bacteroidia_Cytophagales_Cyclobacteriaceae_Reichenbachiella	33069	18258	900	951	190	92	20417	10854	2334	1185	160	152	31953	14497	1632	828	212	151	1328	695	377	445	428	721	2005	646	558	290	454	462	2002	300	210	258	600	495	1114	555	290	112	140	123	158	239	94	102	645	267	217
Bacteria_Bacteroidota_Bacteroidia_Cytophagales_Cyclobacteriaceae_Rhodonellum	0	0	0	0	0	0	0	0	0	0	0	0	0	0	0	0	0	0	0	0	0	0	0	0	0	0	0	0	0	0	0	0	0	0	0	0	0	0	0	0	0	0	0	0	0	0	22	0	0
Bacteria_Bacteroidota_Bacteroidia_Cytophagales_Cyclobacteriaceae_Roseivirga	1171	444	124	130	131	73	1071	518	178	103	84	56	1937	585	134	136	82	80	282	185	68	53	0	0	241	141	68	44	82	0	306	149	0	30	0	0	1187	480	300	148	173	227	104	295	88	65	462	293	280
Bacteria_Bacteroidota_Bacteroidia_Cytophagales_Cyclobacteriaceae_Shivajiella	0	0	0	0	21	20	0	0	0	0	50	22	0	0	0	0	31	0	0	0	0	0	0	0	0	0	0	0	0	0	0	0	0	0	0	0	0	28	0	0	0	0	0	69	0	0	0	24	22
Bacteria_Bacteroidota_Bacteroidia_Cytophagales_Cyclobacteriaceae_Tunicatimonas	1891	1702	774	849	146	132	1612	1236	824	619	220	195	1670	1486	884	1115	131	148	264	202	77	54	69	38	334	155	68	44	77	31	293	104	74	23	22	0	529	784	1209	1268	588	624	340	84	48	65	444	860	1067
Bacteria_Bacteroidota_Bacteroidia_Cytophagales_Cyclobacteriaceae_uncultured	292686	331624	256209	275916	82381	60266	295744	307696	250502	145852	92454	50811	265281	324822	225594	205606	110007	57352	221081	210782	84996	72300	59292	69375	185612	129895	92600	66580	108481	55628	177155	175702	77496	45742	49318	59621	29944	85270	60916	24619	20528	18592	12484	6771	4886	3865	48937	53273	39732
Bacteria_Bacteroidota_Bacteroidia_Cytophagales_Cytophagaceae_Cytophaga	3794	1982	190	171	90	53	2252	1390	810	200	70	92	3157	1686	357	128	100	40	528	310	214	170	81	40	597	296	233	200	179	43	708	190	101	59	95	27	3044	1527	1040	492	535	460	454	280	216	300	1318	1119	660
Bacteria_Bacteroidota_Bacteroidia_Cytophagales_Cytophagaceae_Rhodocytophaga	346	201	46	45	23	69	268	124	40	17	34	148	293	182	39	24	0	42	27	22	0	15	92	66	45	26	22	28	87	0	59	17	35	27	0	0	227	33	17	0	0	14	16	26	15	53	33	28	15
Bacteria_Bacteroidota_Bacteroidia_Cytophagales_Cytophagaceae_Siphonobacter	256	101	32	58	112	33	95	66	83	58	74	55	213	133	37	71	138	34	322	208	332	173	88	34	546	1096	502	338	330	93	148	51	279	74	202	23	35	34	18	11	15	18	10	0	0	0	20	28	22
Bacteria_Bacteroidota_Bacteroidia_Cytophagales_Cytophagaceae_Sporocytophaga	628	1200	762	742	124	53	1019	1082	1035	541	101	69	783	1448	667	591	204	56	254	270	142	117	76	73	338	191	113	78	103	44	358	180	98	72	46	30	1358	491	215	151	290	218	289	185	109	159	674	240	197
Bacteria_Bacteroidota_Bacteroidia_Cytophagales_Cytophagaceae_uncultured	79	112	71	84	40	0	53	69	72	37	16	0	62	94	93	124	19	0	63	47	18	0	73	112	20	24	0	0	25	0	19	47	25	0	21	40	0	0	0	0	0	0	0	0	0	0	0	0	0
Bacteria_Bacteroidota_Bacteroidia_Cytophagales_Flammeovirgaceae_Algivirga	795	297	132	83	0	0	395	266	108	56	0	33	807	259	142	78	0	0	82	18	19	19	0	0	177	21	0	0	0	749	211	0	0	0	0	0	18	17	18	44	32	36	31	14	0	0	12	16	10
Bacteria_Bacteroidota_Bacteroidia_Cytophagales_Flammeovirgaceae_Flammeovirga	562	286	120	97	22	0	301	209	108	80	57	0	516	278	85	118	0	0	0	99	40	56	0	0	270	56	51	43	40	0	236	89	29	52	0	0	0	12	0	0	20	0	16	17	0	0	0	16	14
Bacteria_Bacteroidota_Bacteroidia_Cytophagales_Flammeovirgaceae_Flexithrix	3243	1380	210	272	171	249	1529	814	287	326	255	400	2801	1107	307	309	228	227	511	509	454	297	399	256	818	514	336	298	241	213	778	297	313	287	382	439	1181	166	67	43	84	84	105	167	59	49	459	116	131
Bacteria_Bacteroidota_Bacteroidia_Cytophagales_Flammeovirgaceae_Limibacter	78	69	62	27	15	0	61	67	35	31	15	0	104	50	43	32	37	19	32	32	29	29	30	18	37	29	34	25	29	25	37	25	32	29	35	0	327	78	33	23	20	21	18	0	12	18	165	72	33
Bacteria_Bacteroidota_Bacteroidia_Cytophagales_Flammeovirgaceae_Luteivirga	1511	995	217	214	64	66	990	698	243	154	228	39	1295	784	213	166	84	60	109	109	50	62	30	26	153	78	50	34	55	55	97	78	41	33	34	0	61	43	46	24	23	33	23	25	0	21	44	45	30
Bacteria_Bacteroidota_Bacteroidia_Cytophagales_Flammeovirgaceae_Perexilibacter	576	182	0	0	0	0	218	91	15	0	0	0	505	122	0	0	0	0	0	15	0	0	0	0	21	0	0	0	0	0	0	0	0	0	0	0	270	11	0	0	0	0	0	0	0	0	78	0	0
Bacteria_Bacteroidota_Bacteroidia_Cytophagales_Flammeovirgaceae_Rapidithrix	6186	2074	112	160	38	30	3049	1291	260	213	40	75	7900	1605	241	218	148	37	393	137	159	115	73	42	440	148	107	77	189	30	545	86	67	86	19	63	697	112	40	17	20	31	19	12	27	0	262	62	69
Bacteria_Bacteroidota_Bacteroidia_Cytophagales_Flammeovirgaceae_Sediminitomix	89	101	71	38	0	0	74	79	57	0	0	0	61	91	50	51	0	0	145	76	0	0	0	0	102	43	20	0	27	0	83	47	0	0	0	0	13	42	0	0	0	0	0	0	0	0	24	0	0
Bacteria_Bacteroidota_Bacteroidia_Cytophagales_Flammeovirgaceae_uncultured	1463	570	34	36	0	0	671	357	108	36	20	46	1200	606	48	50	0	0	155	44	63	70	46	32	180	28	41	23	23	0	225	60	47	31	0	59	487	112	50	0	18	29	14	0	0	0	202	52	37
Bacteria_Bacteroidota_Bacteroidia_Cytophagales_Hymenobacteraceae_Adhaeribacter	1626	1126	355	502	363	291	1086	801	809	465	372	193	1221	840	362	511	176	225	229	224	132	91	92	275	288	151	141	92	168	169	337	138	88	103	123	240	713	366	318	139	189	220	270	383	337	483	331	257	193
Bacteria_Bacteroidota_Bacteroidia_Cytophagales_Hymenobacteraceae_Hymenobacter	4099	2544	458	426	263	160	2131	1385	576	332	214	183	3486	1943	547	506	178	155	869	523	339	277	267	379	936	485	327	201	376	240	762	326	220	240	326	319	860	727	374	163	284	386	247	229	216	182	675	359	277
Bacteria_Bacteroidota_Bacteroidia_Cytophagales_Hymenobacteraceae_Nibribacter	103	92	34	59	57	35	80	63	33	52	0	32	88	74	51	0	43	38	31	25	30	0	0	0	54	20	0	0	0	0	49	0	0	0	0	0	162	75	77	42	64	62	67	70	100	78	90	49	55
Bacteria_Bacteroidota_Bacteroidia_Cytophagales_Hymenobacteraceae_Pontibacter	728	642	479	589	676	1069	565	535	598	573	709	1326	705	608	512	508	544	972	423	435	436	465	372	268	464	476	611	614	495	312	323	315	540	497	203	350	552	455	454	238	274	252	219	157	178	139	364	384	321
Bacteria_Bacteroidota_Bacteroidia_Cytophagales_Hymenobacteraceae_Rufibacter	94	97	152	150	0	0	99	135	145	84	0	0	94	125	111	89	72	0	0	26	0	0	0	0	0	22	0	0	0	0	0	0	0	0	0	0	22	32	33	16	17	17	15	0	0	13	21	29	22
Bacteria_Bacteroidota_Bacteroidia_Cytophagales_Microscillaceae_Chryseolinea	477	206	90	96	46	110	310	136	82	58	0	38	1168	172	58	61	113	41	111	111	86	40	63	57	111	85	61	52	109	165	87	45	54	83	84	55	3224	13112	18733	8708	15341	16057	11860	6211	10518	8699	6303	11620	13414
Bacteria_Bacteroidota_Bacteroidia_Cytophagales_Microscillaceae_Eisenibacter	0	0	0	0	0	0	0	0	0	0	0	0	0	0	0	0	0	0	0	0	0	0	0	0	0	0	0	0	0	0	108	0	0	0	0	40	0	0	0	0	0	0	0	0	0	0	0	0	0
Bacteria_Bacteroidota_Bacteroidia_Cytophagales_Microscillaceae_Flexibacter	0	20	0	30	0	0	0	0	0	0	0	0	19	0	18	0	18	0	18	0	0	0	0	0	0	0	0	0	0	0	26	0	0	0	0	0	32	0	0	0	0	0	0	0	0	0	0	0	0
Bacteria_Bacteroidota_Bacteroidia_Cytophagales_Microscillaceae_Hassallia	106	78	34	51	28	55	91	81	69	35	43	42	68	127	49	41	24	25	170	125	108	130	211	179	147	94	90	93	155	106	127	93	69	119	253	119	371	477	431	255	499	479	452	1026	2226	1503	337	497	296
Bacteria_Bacteroidota_Bacteroidia_Cytophagales_Microscillaceae_Microscilla	6816	365	32	31	22	0	1477	234	65	107	0	30	3169	196	25	31	0	0	31	18	17	0	0	0	56	21	25	0	0	0	142	21	19	30	19	0	131	76	57	36	43	39	53	37	28	30	63	50	41
Bacteria_Bacteroidota_Bacteroidia_Cytophagales_Microscillaceae_OLB12	73	33	0	0	0	0	64	31	0	0	0	0	63	36	0	38	0	0	0	0	0	0	0	0	47	0	0	0	0	0	109	0	0	0	0	0	2228	8825	11233	4845	7026	7572	4579	4369	1196	445	4296	6648	7204
Bacteria_Bacteroidota_Bacteroidia_Cytophagales_Microscillaceae_Ohtaekwangia	541	287	101	111	65	34	318	246	98	85	46	41	304	332	120	118	54	44	66	66	49	41	62	50	85	52	55	30	46	93	110	42	35	54	48	90	288	484	400	201	332	384	222	165	255	287	298	329	344
Bacteria_Bacteroidota_Bacteroidia_Cytophagales_Microscillaceae_Thermoflexibacter	0	0	0	0	0	0	0	0	0	0	0	0	0	0	0	0	0	0	0	0	0	22	20	18	0	0	15	15	0	0	0	0	0	0	41	0	0	14	16	0	10	0	10	0	12	0	20	0	0
Bacteria_Bacteroidota_Bacteroidia_Cytophagales_Microscillaceae_uncultured	3326	2711	1310	1384	655	735	2565	2088	1316	797	1297	960	3106	2548	1201	1267	538	696	2488	1732	1192	907	556	425	2413	1580	1435	1111	1166	504	2578	1282	1064	633	508	265	17653	40524	22414	8248	12237	12337	8241	4860	4462	3571	25375	20040	13433
Bacteria_Bacteroidota_Bacteroidia_Cytophagales_Mooreiaceae_Mooreia	16	0	0	0	0	0	0	0	24	0	0	0	22	18	0	0	0	0	0	0	0	0	0	0	0	0	0	0	0	0	0	0	0	0	0	0	0	0	0	0	0	0	0	0	0	0	0	19	0
Bacteria_Bacteroidota_Bacteroidia_Cytophagales_Raineyaceae_Raineya	251	607	77	64	70	109	216	170	96	65	106	164	207	329	56	99	58	77	218	104	105	70	62	222	215	115	120	81	97	86	159	90	94	64	36	0	106	174	194	104	126	144	85	56	75	54	99	182	131
Bacteria_Bacteroidota_Bacteroidia_Cytophagales_Spirosomaceae_Arcicella	31	44	0	0	0	0	25	29	23	0	0	0	52	47	21	27	0	0	46	0	0	0	32	0	37	0	0	23	0	0	46	0	0	0	0	0	69	155	88	35	46	40	34	17	0	15	101	91	74
Bacteria_Bacteroidota_Bacteroidia_Cytophagales_Spirosomaceae_Arsenicibacter	0	0	0	0	0	0	0	0	0	0	0	0	0	0	0	0	0	0	0	0	0	18	27	0	0	0	0	0	0	0	0	0	0	0	26	0	0	0	0	0	0	0	0	0	0	0	0	0	0
Bacteria_Bacteroidota_Bacteroidia_Cytophagales_Spirosomaceae_Dyadobacter	267	209	168	138	163	130	226	168	161	138	173	247	203	260	158	232	103	174	249	267	111	110	146	121	302	231	101	98	99	149	340	200	106	98	101	115	333	267	285	133	240	252	218	122	201	279	204	227	182
Bacteria_Bacteroidota_Bacteroidia_Cytophagales_Spirosomaceae_Emticicia	299	147	44	46	36	22	179	96	57	51	22	26	188	179	39	30	31	0	40	53	44	33	33	27	88	58	54	39	76	35	96	56	44	27	26	0	229	150	61	42	37	37	37	31	14	29	187	72	53
Bacteria_Bacteroidota_Bacteroidia_Cytophagales_Spirosomaceae_Fibrella	22	0	0	0	0	0	0	0	0	21	0	20	18	21	0	0	66	0	133	69	32	0	85	17	89	41	28	0	32	0	351	31	30	25	74	54	0	14	16	0	0	0	0	0	0	0	0	11	21
Bacteria_Bacteroidota_Bacteroidia_Cytophagales_Spirosomaceae_Fibrisoma	38	55	0	0	0	0	31	0	0	0	0	0	31	22	0	0	0	0	0	0	0	0	0	0	0	0	0	0	0	0	0	0	0	0	0	0	0	25	34	27	20	13	16	11	14	15	15	22	20
Bacteria_Bacteroidota_Bacteroidia_Cytophagales_Spirosomaceae_Flectobacillus	51	69	73	193	0	0	43	70	769	88	0	0	20	46	169	151	0	0	20	0	0	0	0	0	0	0	0	0	0	0	17	0	0	0	0	0	18	26	15	0	0	0	13	0	0	0	16	11	11
Bacteria_Bacteroidota_Bacteroidia_Cytophagales_Spirosomaceae_Fluviimonas	0	22	0	0	0	0	18	0	0	0	0	0	0	0	0	0	0	0	0	0	0	0	0	0	0	0	0	0	0	0	0	0	0	0	0	0	0	0	0	0	0	0	0	0	0	0	0	0	0
Bacteria_Bacteroidota_Bacteroidia_Cytophagales_Spirosomaceae_Lacihabitans	27	0	0	22	0	0	20	0	0	66	0	0	25	0	0	0	0	0	40	0	0	0	0	0	49	80	0	23	0	0	100	31	0	0	0	0	309	127	19	14	0	0	0	13	0	0	138	34	32
Bacteria_Bacteroidota_Bacteroidia_Cytophagales_Spirosomaceae_Larkinella	126	124	51	68	42	102	120	94	49	44	66	180	102	101	44	96	25	70	287	110	498	583	653	221	226	175	503	583	518	181	590	115	509	535	717	540	37	88	58	20	27	35	37	69	133	131	54	47	21
Bacteria_Bacteroidota_Bacteroidia_Cytophagales_Spirosomaceae_Leadbetterella	28	31	25	24	17	0	32	31	23	0	22	0	20	26	24	35	16	0	119	39	24	30	0	0	102	24	22	0	30	0	120	31	0	0	17	0	102	62	31	26	26	32	31	35	24	32	77	35	23
Bacteria_Bacteroidota_Bacteroidia_Cytophagales_Spirosomaceae_Nibrella	34	68	43	66	45	0	44	101	85	57	23	0	35	62	52	37	47	0	0	0	0	0	0	0	0	0	0	0	0	0	22	0	0	0	0	25	76	23	16	0	11	0	13	0	0	0	24	17	11
Bacteria_Bacteroidota_Bacteroidia_Cytophagales_Spirosomaceae_Persicitalea	334	62	29	34	0	0	124	64	26	23	0	0	308	56	27	27	0	0	133	84	17	0	18	58	75	66	32	18	0	72	146	37	0	0	0	0	137	81	48	20	24	10	0	20	11	12	115	47	47
Bacteria_Bacteroidota_Bacteroidia_Cytophagales_Spirosomaceae_Pseudarcicella	261	260	146	129	94	60	205	186	186	131	97	60	223	357	134	151	119	82	188	170	78	111	108	144	176	115	107	112	162	127	237	84	78	77	56	95	145	349	355	213	236	270	176	122	118	102	203	386	301
Bacteria_Bacteroidota_Bacteroidia_Cytophagales_Spirosomaceae_Rhabdobacter	0	0	0	0	0	0	0	0	0	0	0	0	0	0	0	0	0	0	96	95	0	0	0	0	102	63	0	0	0	0	78	45	0	0	0	0	0	0	0	0	0	0	0	0	0	0	0	0	0
Bacteria_Bacteroidota_Bacteroidia_Cytophagales_Spirosomaceae_Rudanella	0	0	0	0	0	0	0	0	0	0	0	0	0	0	0	17	0	0	0	0	0	0	18	0	0	0	0	0	0	0	0	0	0	0	21	54	10	0	0	0	0	0	0	25	25	0	0	0	0
Bacteria_Bacteroidota_Bacteroidia_Cytophagales_Spirosomaceae_Runella	45	68	28	35	0	0	41	41	38	33	0	0	45	54	40	45	0	0	182	316	232	95	0	0	214	206	188	125	76	38	132	157	240	189	0	24	48	58	35	13	16	21	25	77	78	67	43	49	23
Bacteria_Bacteroidota_Bacteroidia_Cytophagales_Spirosomaceae_Spirosoma	358	203	74	68	75	49	225	150	97	50	128	54	303	168	79	79	121	50	247	161	131	85	99	104	321	145	110	75	82	54	328	157	78	51	113	355	334	290	187	124	124	96	98	346	100	83	220	193	110
Bacteria_Bacteroidota_Bacteroidia_Cytophagales_Spirosomaceae_Taeseokella	654	207	0	0	0	0	245	166	49	0	0	0	310	185	16	18	17	0	31	0	18	20	0	0	71	29	27	0	0	0	116	0	0	0	0	0	765	192	74	27	45	24	35	31	13	13	313	130	85
Bacteria_Bacteroidota_Bacteroidia_Cytophagales_Spirosomaceae_uncultured	1334	868	160	226	114	64	1189	679	157	101	179	59	1093	610	261	215	61	44	83	121	112	123	318	252	134	162	101	110	214	119	80	85	111	134	459	475	519	181	66	45	59	38	56	43	39	26	236	90	71
Bacteria_Bacteroidota_Bacteroidia_Cytophagales_Thermonemataceae_Thermonema	0	0	0	0	0	0	0	0	0	0	0	0	0	0	0	0	0	0	0	0	0	0	0	0	0	0	0	0	0	0	0	0	0	0	0	0	0	0	0	0	0	0	0	0	0	0	0	0	12
Bacteria_Bacteroidota_Bacteroidia_Flavobacteriales_Blattabacteriaceae_Blattabacterium	213	250	0	0	0	0	162	0	0	0	0	0	224	0	0	0	0	0	0	0	0	75	58	0	280	0	0	0	0	0	0	0	0	0	0	0	161	215	102	22	37	34	28	23	16	20	157	101	59
Bacteria_Bacteroidota_Bacteroidia_Flavobacteriales_Blattabacteriaceae_Candidatus Brownia	91	118	42	41	27	39	85	95	60	47	21	44	157	81	51	80	34	19	73	70	19	24	31	35	107	70	43	30	30	19	108	45	23	0	0	0	90	185	180	111	147	110	129	101	84	72	77	139	107
Bacteria_Bacteroidota_Bacteroidia_Flavobacteriales_Blattabacteriaceae_Candidatus Sulcia	1424	416	200	253	522	184	702	609	330	294	302	320	1767	429	238	296	156	174	642	295	235	212	192	188	366	232	211	148	191	142	445	183	165	166	231	201	537	365	293	163	275	257	275	247	188	127	296	278	218
Bacteria_Bacteroidota_Bacteroidia_Flavobacteriales_Blattabacteriaceae_Candidatus Uzinura	366	445	310	272	244	274	307	354	341	296	266	273	274	438	273	271	302	269	336	703	1084	1078	605	368	495	507	880	777	475	295	322	377	1662	1504	678	309	635	835	1074	487	565	477	597	566	614	346	497	817	669
Bacteria_Bacteroidota_Bacteroidia_Flavobacteriales_Blattabacteriaceae_uncultured	182	183	82	72	78	22	151	186	93	73	63	27	180	258	77	81	59	28	111	106	89	88	51	65	224	88	98	48	106	46	302	64	52	60	81	56	352	73	84	46	53	47	36	31	25	21	97	56	76
Bacteria_Bacteroidota_Bacteroidia_Flavobacteriales_Crocinitomicaceae_Brumimicrobium	914	1585	154	199	39	0	1216	1143	438	178	32	0	869	1417	211	197	43	0	454	217	115	136	73	37	454	202	129	71	144	67	662	165	83	58	35	42	2024	1558	633	213	186	217	214	72	40	40	1340	714	432
Bacteria_Bacteroidota_Bacteroidia_Flavobacteriales_Crocinitomicaceae_Crocinitomix	22043	18161	1411	1227	225	157	19316	13321	3105	1383	403	279	19715	17758	1831	942	439	229	8143	4201	2645	2306	1425	930	10629	3573	2327	1073	4447	923	11368	2751	995	752	1197	1172	8077	4346	2269	1099	1815	1383	1338	699	455	1503	3907	2133	1867
Bacteria_Bacteroidota_Bacteroidia_Flavobacteriales_Crocinitomicaceae_Fluviicola	21131	17435	2018	2171	667	210	16446	12307	4418	1776	344	406	18754	15970	2749	1816	560	275	4968	2572	1726	1641	631	481	6862	2230	1275	560	3968	563	8068	1961	603	445	213	218	24860	8799	8737	3408	4254	3428	3204	2498	1431	699	7867	7749	3585
Bacteria_Bacteroidota_Bacteroidia_Flavobacteriales_Crocinitomicaceae_Lishizhenia	265	154	0	19	0	0	651	342	29	85	0	0	278	181	19	0	0	0	304	122	39	31	0	0	164	85	39	19	125	0	269	98	20	0	0	0	249	520	889	308	475	833	480	967	188	38	264	488	593
Bacteria_Bacteroidota_Bacteroidia_Flavobacteriales_Crocinitomicaceae_Salinirepens	5620	3824	284	262	47	0	3959	2459	775	215	52	95	4774	3216	517	181	30	35	884	475	211	186	116	79	941	327	256	93	968	99	958	277	37	47	41	0	3747	1114	535	297	466	273	314	306	165	98	1048	651	323
Bacteria_Bacteroidota_Bacteroidia_Flavobacteriales_Crocinitomicaceae_Wandonia	82	67	30	33	0	0	71	35	0	0	22	0	53	35	0	27	0	0	26	0	32	26	44	23	31	0	0	25	0	32	24	0	56	49	0	0	325	183	173	90	84	110	65	46	67	39	130	140	95
Bacteria_Bacteroidota_Bacteroidia_Flavobacteriales_Crocinitomicaceae_uncultured	5855	7205	5789	6307	96	33	6290	6930	6178	2348	255	117	6019	8606	4423	4262	329	69	21100	11001	3090	3285	795	384	12231	5391	2719	1120	10881	568	15970	7857	1104	278	55	94	7696	17949	24517	7450	12212	18355	11438	25087	6851	1297	8663	11632	13992
Bacteria_Bacteroidota_Bacteroidia_Flavobacteriales_Cryomorphaceae_Cryomorpha	2131	2191	244	304	247	141	1921	1610	544	305	300	172	1912	2167	312	350	259	192	9459	3918	1684	1402	546	415	5386	2259	1186	606	3221	386	7540	3010	597	318	236	324	4188	6868	3780	1119	1356	1392	879	2083	400	154	4285	3130	2042
Bacteria_Bacteroidota_Bacteroidia_Flavobacteriales_Cryomorphaceae_Luteibaculum	2904	1406	334	374	257	35	1458	986	485	359	161	39	2133	1226	370	319	241	56	294	218	87	174	475	313	300	156	130	88	212	633	418	168	82	35	544	1007	521	501	382	157	268	264	306	210	218	217	379	290	243
Bacteria_Bacteroidota_Bacteroidia_Flavobacteriales_Cryomorphaceae_NS10 marine group	6939	3179	528	446	325	253	3998	2174	873	451	345	303	6415	3564	583	439	264	344	3697	1058	1347	1133	765	188	4857	962	363	235	680	140	6679	565	313	165	423	163	2068	1688	523	332	334	234	273	166	133	92	1768	523	597
Bacteria_Bacteroidota_Bacteroidia_Flavobacteriales_Cryomorphaceae_Owenweeksia	2579	2000	704	818	854	256	1955	1420	1002	657	495	177	2055	2109	723	558	797	235	4290	2543	897	867	509	743	3782	1468	884	370	1926	513	4318	2074	376	232	471	458	783	972	549	219	356	271	235	138	111	87	545	584	280
Bacteria_Bacteroidota_Bacteroidia_Flavobacteriales_Cryomorphaceae_Phaeocystidibacter	421	594	458	321	0	0	552	504	363	84	0	0	286	506	235	183	24	0	646	363	87	101	45	0	595	196	150	43	354	0	584	204	59	17	0	0	87	211	82	16	38	37	33	0	0	0	130	65	48
Bacteria_Bacteroidota_Bacteroidia_Flavobacteriales_Cryomorphaceae_Vicingus	71477	71221	20989	17685	3739	2879	66173	57019	21372	7382	3962	4507	64474	72448	17289	12164	3277	3765	21199	12100	5455	4794	3772	2574	23899	8214	4736	2253	10609	1643	20997	7937	3061	1885	2135	1832	13215	12580	4592	1751	2301	2713	2686	1834	1280	976	10168	4693	3031
Bacteria_Bacteroidota_Bacteroidia_Flavobacteriales_Cryomorphaceae_uncultured	33997	26732	4527	4849	1978	1606	28534	22020	9356	3472	2593	1740	37421	39661	6631	4069	2271	1876	24851	9206	6913	6628	4344	3391	26097	7823	5064	2352	11506	2278	35679	6424	3773	2646	2373	4135	30587	24139	13344	5652	6541	5449	5137	9997	2796	1742	17985	12990	8960
Bacteria_Bacteroidota_Bacteroidia_Flavobacteriales_Flavobacteriaceae_Actibacter	8730	12095	10287	11287	763	115	10294	11895	12252	7310	412	362	10107	14656	9729	9095	1176	215	21584	21473	6887	4807	1635	974	14557	10133	3906	2192	7785	563	15275	19357	4741	862	79	213	12506	52387	51173	16790	23541	32343	37620	35958	20581	12274	20878	39778	29196
Bacteria_Bacteroidota_Bacteroidia_Flavobacteriales_Flavobacteriaceae_Aequorivita	462	397	127	150	42	0	355	291	233	90	38	0	330	350	164	115	37	0	518	481	347	323	111	80	462	297	275	228	315	43	464	265	342	252	127	78	268	532	718	321	815	934	671	1179	1117	696	297	556	537
Bacteria_Bacteroidota_Bacteroidia_Flavobacteriales_Flavobacteriaceae_Aestuariibaculum	255	213	69	64	68	32	208	179	95	97	59	0	220	234	109	58	32	0	191	141	86	49	32	53	237	123	81	52	92	46	129	87	70	0	0	0	56	102	76	28	47	47	62	76	71	48	53	52	44
Bacteria_Bacteroidota_Bacteroidia_Flavobacteriales_Flavobacteriaceae_Aestuariimonas	96	85	35	38	0	0	55	47	94	0	0	0	55	101	40	0	0	0	830	537	201	119	0	0	556	312	164	175	420	45	614	401	202	71	0	0	1470	6605	12067	7276	8005	10021	19109	40398	17916	7732	2708	6499	11807
Bacteria_Bacteroidota_Bacteroidia_Flavobacteriales_Flavobacteriaceae_Algibacter	3408	3824	443	407	0	0	3385	3718	2303	350	0	0	2783	3864	883	390	165	0	3788	1705	558	482	438	0	2759	1606	672	385	769	246	2748	1101	286	0	239	562	143	223	209	115	145	156	186	288	309	240	123	225	134
Bacteria_Bacteroidota_Bacteroidia_Flavobacteriales_Flavobacteriaceae_Algitalea	171	126	0	30	0	0	173	103	105	0	0	0	386	151	39	0	0	0	137	52	39	41	0	0	178	56	0	0	0	0	249	45	0	0	0	0	79	92	583	281	1006	39	523	131	65	141	45	323	243
Bacteria_Bacteroidota_Bacteroidia_Flavobacteriales_Flavobacteriaceae_Antarcticibacterium	142	89	54	0	0	0	70	69	54	0	0	0	135	75	38	0	0	0	49	36	0	0	0	0	92	51	0	0	50	0	57	47	0	0	0	0	28	64	51	0	66	28	42	45	65	65	20	37	30
Bacteria_Bacteroidota_Bacteroidia_Flavobacteriales_Flavobacteriaceae_Antarcticimonas	0	0	0	0	0	0	0	0	0	0	0	0	0	0	0	0	0	0	0	0	0	0	0	0	0	0	0	0	0	0	0	0	0	0	0	0	16	0	14	0	0	0	0	0	0	0	0	0	0
Bacteria_Bacteroidota_Bacteroidia_Flavobacteriales_Flavobacteriaceae_Aquibacter	20240	17159	2315	2240	354	71	19253	12169	4604	1696	189	320	17422	17368	4189	2210	394	254	4794	3770	1358	962	487	268	7667	3963	1788	1144	2898	468	5619	3212	816	279	105	202	3948	8158	9679	5620	9326	12987	9717	16663	16737	14802	5999	5797	8407
Bacteria_Bacteroidota_Bacteroidia_Flavobacteriales_Flavobacteriaceae_Aquimarina	1676	702	107	177	0	0	877	445	238	84	0	0	983	638	144	86	0	0	316	239	106	112	0	0	365	134	90	57	137	0	301	145	41	0	0	0	211	299	409	301	376	310	331	352	226	271	221	275	291
Bacteria_Bacteroidota_Bacteroidia_Flavobacteriales_Flavobacteriaceae_Arcticiflavibacter	841	784	106	112	53	0	788	648	327	134	0	0	827	921	141	114	43	0	7418	9834	2625	2039	548	254	13805	9165	4888	3992	3156	710	9048	6453	3425	614	0	0	101	170	184	68	198	178	135	356	219	171	93	163	111
Bacteria_Bacteroidota_Bacteroidia_Flavobacteriales_Flavobacteriaceae_Arenibacter	363	330	91	87	44	39	294	225	125	73	26	33	342	283	79	77	30	42	249	197	66	76	35	32	310	146	54	36	132	30	236	163	42	35	0	37	320	674	729	467	603	645	618	1552	1015	525	508	572	593
Bacteria_Bacteroidota_Bacteroidia_Flavobacteriales_Flavobacteriaceae_Ascidiimonas	191	76	17	17	0	0	127	63	34	0	0	0	150	134	0	0	0	0	59	20	0	0	0	0	77	0	0	0	0	0	80	21	0	0	0	0	12	0	0	0	0	0	0	0	0	0	0	0	11
Bacteria_Bacteroidota_Bacteroidia_Flavobacteriales_Flavobacteriaceae_Aurantivirga	725	381	81	0	0	0	471	291	157	0	0	0	463	429	87	71	0	0	437	176	159	152	0	0	412	154	0	0	168	0	485	139	0	0	0	0	246	73	98	40	106	61	103	89	47	79	83	67	82
Bacteria_Bacteroidota_Bacteroidia_Flavobacteriales_Flavobacteriaceae_Aureicoccus	83	89	0	0	0	0	100	36	128	0	0	0	113	95	0	0	0	0	45	0	0	0	0	0	52	0	0	0	0	0	105	0	0	0	0	0	0	0	0	0	0	0	0	0	0	0	0	0	0
Bacteria_Bacteroidota_Bacteroidia_Flavobacteriales_Flavobacteriaceae_Aureimarina	0	0	0	0	0	0	0	0	0	0	0	0	0	0	0	0	0	0	0	0	0	0	0	0	0	0	0	0	0	0	0	0	0	0	0	0	0	0	0	0	0	26	16	0	0	0	0	0	0
Bacteria_Bacteroidota_Bacteroidia_Flavobacteriales_Flavobacteriaceae_Aureisphaera	328	191	32	0	0	0	229	98	50	0	0	0	230	160	36	0	0	0	47	38	0	0	0	0	74	0	0	0	34	0	102	0	0	0	0	0	0	37	21	19	27	29	27	75	78	59	0	18	0
Bacteria_Bacteroidota_Bacteroidia_Flavobacteriales_Flavobacteriaceae_Aureivirga	23	92	239	215	0	0	42	192	195	56	0	0	0	94	165	107	0	0	0	28	0	0	0	0	0	0	0	0	0	0	0	0	0	0	0	0	0	0	12	0	16	0	0	21	28	19	0	0	0
Bacteria_Bacteroidota_Bacteroidia_Flavobacteriales_Flavobacteriaceae_Bizionia	270	224	86	84	0	0	228	173	168	0	0	0	260	238	62	0	0	0	199	146	0	0	0	0	199	110	73	0	106	0	219	90	0	0	0	0	187	308	340	141	252	255	236	279	251	188	174	223	186
Bacteria_Bacteroidota_Bacteroidia_Flavobacteriales_Flavobacteriaceae_Capnocytophaga	1272	1188	662	675	315	138	1139	972	915	473	310	241	1039	1085	600	703	285	160	1195	1046	523	456	271	211	1463	896	534	421	544	226	1068	870	350	311	253	251	895	1469	1496	798	1236	1181	1256	1216	1135	878	919	1099	1127
Bacteria_Bacteroidota_Bacteroidia_Flavobacteriales_Flavobacteriaceae_Cellulophaga	770	988	246	260	0	0	794	777	819	132	0	0	833	1027	398	155	0	0	4323	2623	937	783	279	145	2103	1118	655	321	1920	62	2410	1813	328	97	0	0	885	1292	820	850	692	844	676	1010	525	451	938	773	717
Bacteria_Bacteroidota_Bacteroidia_Flavobacteriales_Flavobacteriaceae_Changchengzhania	517	483	0	0	0	0	525	279	101	0	0	0	395	441	0	0	0	0	133	0	0	0	0	0	206	0	0	0	0	0	196	0	0	0	0	0	0	0	0	0	0	0	0	0	0	0	0	0	0
Bacteria_Bacteroidota_Bacteroidia_Flavobacteriales_Flavobacteriaceae_Citreitalea	99	224	88	153	130	96	115	130	104	126	189	80	110	185	114	110	161	78	51	52	0	30	0	64	105	43	0	0	45	0	54	57	0	0	0	46	28	34	21	0	0	0	0	0	0	0	29	23	0
Bacteria_Bacteroidota_Bacteroidia_Flavobacteriales_Flavobacteriaceae_Coenonia	122	218	91	97	0	0	160	181	265	48	0	0	83	424	90	57	0	0	52	71	53	40	0	0	71	38	34	22	38	0	66	64	53	31	0	0	37	38	62	36	75	39	47	46	31	33	25	47	46
Bacteria_Bacteroidota_Bacteroidia_Flavobacteriales_Flavobacteriaceae_Confluentibacter	0	0	0	0	0	0	0	0	0	0	0	0	0	0	0	0	0	0	63	0	0	0	0	0	114	0	0	0	0	0	64	0	0	0	0	0	642	350	145	21	38	35	37	37	51	20	412	154	102
Bacteria_Bacteroidota_Bacteroidia_Flavobacteriales_Flavobacteriaceae_Costertonia	23	142	81	66	0	0	65	147	90	46	0	0	25	128	62	44	0	0	172	85	39	52	0	17	116	86	36	0	59	0	148	39	0	0	0	0	67	85	52	48	34	28	28	12	25	13	43	48	44
Bacteria_Bacteroidota_Bacteroidia_Flavobacteriales_Flavobacteriaceae_Croceibacter	82	42	0	0	0	0	64	52	34	0	0	0	56	46	24	20	0	0	212	39	55	64	0	0	190	33	46	22	59	0	345	0	0	0	0	0	61	42	43	36	40	34	31	30	28	52	58	33	28
Bacteria_Bacteroidota_Bacteroidia_Flavobacteriales_Flavobacteriaceae_Croceitalea	1137	640	42	50	0	0	852	414	52	80	0	0	1146	658	78	0	30	0	1017	348	389	347	136	40	2228	586	304	129	375	85	2984	222	108	35	0	0	193	69	54	23	48	53	52	56	50	57	88	47	41
Bacteria_Bacteroidota_Bacteroidia_Flavobacteriales_Flavobacteriaceae_Dokdonia	1400	720	107	57	0	0	923	487	158	63	0	0	1549	685	110	66	0	0	198	88	263	85	0	0	256	93	45	36	65	0	376	72	0	0	0	0	120	145	155	69	98	71	111	83	66	39	117	78	84
Bacteria_Bacteroidota_Bacteroidia_Flavobacteriales_Flavobacteriaceae_Eudoraea	9897	8782	2787	2615	1198	418	7634	7125	4020	2299	707	432	8376	8080	3069	3068	1911	871	64254	61387	31237	21696	4920	2624	39666	34554	17838	15206	19673	1502	40965	51189	27154	12447	82	669	1861	8056	13382	6044	11451	12994	9990	6038	2770	1516	4126	8338	11974
Bacteria_Bacteroidota_Bacteroidia_Flavobacteriales_Flavobacteriaceae_Euzebyella	180	59	0	0	0	0	123	54	0	0	0	0	184	59	0	0	0	0	0	0	0	0	0	0	22	0	0	0	0	0	0	0	0	0	0	0	0	21	16	12	16	0	0	13	0	0	0	0	12
Bacteria_Bacteroidota_Bacteroidia_Flavobacteriales_Flavobacteriaceae_Flagellimonas	41	0	0	0	0	0	0	0	0	0	0	0	0	0	0	0	0	0	0	38	0	0	0	0	0	0	0	0	0	0	0	0	0	0	0	0	0	18	0	0	19	0	21	23	23	24	0	18	21
Bacteria_Bacteroidota_Bacteroidia_Flavobacteriales_Flavobacteriaceae_Flavicella	728	521	40	44	0	0	555	348	170	46	0	0	621	465	89	47	0	0	124	90	28	43	0	0	176	102	39	0	56	0	226	61	33	0	0	0	78	183	199	145	260	133	246	141	103	101	97	131	135
Bacteria_Bacteroidota_Bacteroidia_Flavobacteriales_Flavobacteriaceae_Flavimarina	100	61	0	0	0	0	80	34	22	0	0	0	169	80	22	0	0	0	76	79	35	25	0	0	103	83	26	0	30	0	107	59	0	0	0	0	45	125	136	52	54	25	17	15	24	0	90	123	89
Bacteria_Bacteroidota_Bacteroidia_Flavobacteriales_Flavobacteriaceae_Flavirhabdus	856	949	473	369	0	0	824	744	561	180	0	0	818	765	304	295	0	0	370	290	156	93	0	0	417	216	116	106	197	123	355	265	0	96	0	0	110	167	293	214	212	265	242	283	278	315	121	167	215
Bacteria_Bacteroidota_Bacteroidia_Flavobacteriales_Flavobacteriaceae_Flavivirga	249	169	0	0	0	0	286	116	0	0	0	0	274	155	45	0	0	0	214	102	0	0	0	0	97	0	0	0	0	0	104	0	0	0	0	0	29	87	110	58	93	70	53	33	34	23	46	47	96
Bacteria_Bacteroidota_Bacteroidia_Flavobacteriales_Flavobacteriaceae_Flavobacterium	20699	19027	6175	6864	4046	2575	17169	14540	10072	5721	4293	2654	17982	17325	6240	6950	3765	2756	15617	12675	5971	5052	2793	2553	15617	8334	5577	3786	6926	2707	16528	9198	4128	3211	2025	2112	50564	51033	42291	42353	37009	41318	34655	32018	24808	14583	39653	37373	31509
Bacteria_Bacteroidota_Bacteroidia_Flavobacteriales_Flavobacteriaceae_Formosa	5520	4605	1124	1265	540	135	4075	3277	2087	996	488	216	4574	4292	1804	1528	386	216	11896	10098	3326	2276	841	655	11942	7256	2567	1802	2383	502	12814	8535	2141	443	70	234	7354	20131	15774	8741	12370	15414	14963	15001	11290	8339	10043	14158	11360
Bacteria_Bacteroidota_Bacteroidia_Flavobacteriales_Flavobacteriaceae_Frondibacter	0	0	0	0	0	0	0	0	0	0	0	0	27	0	0	0	0	0	0	0	0	0	0	0	0	0	0	0	0	0	0	0	0	0	0	0	0	0	0	0	0	0	0	0	0	0	0	0	0
Bacteria_Bacteroidota_Bacteroidia_Flavobacteriales_Flavobacteriaceae_Fulvibacter	24	35	0	0	0	0	20	21	0	0	0	0	27	23	0	0	0	0	0	0	0	0	0	0	0	0	0	0	0	0	0	0	0	0	0	0	0	79	149	42	120	94	110	137	167	166	19	94	64
Bacteria_Bacteroidota_Bacteroidia_Flavobacteriales_Flavobacteriaceae_Gaetbulibacter	503	480	124	177	0	0	406	382	501	82	0	0	407	392	58	154	0	0	769	397	176	174	0	0	953	416	246	223	319	0	891	347	0	0	0	0	3533	8976	25855	9643	14604	13816	15193	43953	21232	4331	3886	11326	18114
Bacteria_Bacteroidota_Bacteroidia_Flavobacteriales_Flavobacteriaceae_Galbibacter	361	285	27	0	0	0	281	177	25	0	0	0	226	194	44	0	0	0	47	0	0	35	0	0	188	48	27	0	80	0	64	19	0	0	0	0	100	114	29	0	0	19	0	11	0	0	124	34	28
Bacteria_Bacteroidota_Bacteroidia_Flavobacteriales_Flavobacteriaceae_Gangjinia	38	39	30	36	0	0	41	38	34	19	0	0	41	43	20	0	0	0	39	50	0	0	0	0	50	25	0	0	0	0	43	31	0	0	0	0	15	17	23	14	28	15	27	24	25	16	17	22	20
Bacteria_Bacteroidota_Bacteroidia_Flavobacteriales_Flavobacteriaceae_Gelidibacter	140	108	0	0	0	0	90	73	0	0	0	0	140	99	0	0	33	0	497	687	234	137	41	0	561	423	184	169	265	45	380	352	221	68	0	0	354	448	271	118	258	140	173	277	306	179	321	320	235
Bacteria_Bacteroidota_Bacteroidia_Flavobacteriales_Flavobacteriaceae_Gillisia	276	133	0	0	0	0	148	87	101	0	0	0	123	139	58	0	0	0	137	122	0	0	0	0	135	99	58	0	0	0	64	66	0	0	0	0	202	231	275	157	264	217	212	239	180	193	211	160	204
Bacteria_Bacteroidota_Bacteroidia_Flavobacteriales_Flavobacteriaceae_Gilvibacter	1849	1896	253	321	0	0	1483	1383	469	193	0	0	1445	1576	522	192	95	0	341	187	110	61	0	0	501	196	130	0	152	0	641	69	0	0	0	123	274	909	883	349	873	661	537	273	212	157	523	711	459
Bacteria_Bacteroidota_Bacteroidia_Flavobacteriales_Flavobacteriaceae_Gramella	415	347	31	56	0	0	293	271	269	48	0	0	288	319	120	69	0	0	222	208	58	80	0	0	393	124	62	34	60	0	204	112	24	21	0	22	104	164	242	142	213	141	190	172	101	138	117	124	190
Bacteria_Bacteroidota_Bacteroidia_Flavobacteriales_Flavobacteriaceae_Hanstruepera	0	0	0	0	0	0	0	0	0	0	0	0	0	0	0	0	0	0	0	0	0	0	0	0	0	0	0	0	0	0	61	0	0	0	0	0	0	0	0	0	0	0	0	0	0	0	0	0	0
Bacteria_Bacteroidota_Bacteroidia_Flavobacteriales_Flavobacteriaceae_Hoppeia	494	359	509	283	390	311	252	217	278	332	349	345	468	308	470	948	193	242	403	295	380	186	138	0	549	329	216	297	124	31	539	212	183	47	0	0	178	594	708	352	935	948	1035	2008	1932	1488	316	517	578
Bacteria_Bacteroidota_Bacteroidia_Flavobacteriales_Flavobacteriaceae_Hyunsoonleella	237	201	0	44	0	0	186	150	103	0	0	0	228	199	47	0	0	0	247	278	55	60	0	0	404	356	130	68	187	0	406	171	65	0	0	0	70	220	342	106	122	125	104	129	108	167	118	164	224
Bacteria_Bacteroidota_Bacteroidia_Flavobacteriales_Flavobacteriaceae_Ichthyenterobacterium	97	64	0	69	0	0	82	100	680	0	0	0	72	66	0	0	0	0	192	58	195	129	0	0	83	0	0	0	0	0	93	0	0	0	0	0	416	97	22	36	65	42	63	61	71	46	169	69	38
Bacteria_Bacteroidota_Bacteroidia_Flavobacteriales_Flavobacteriaceae_Imtechella	0	0	0	0	0	0	0	0	0	0	29	0	0	0	0	0	37	0	0	0	0	0	0	0	0	0	0	0	0	0	0	0	0	0	0	0	0	0	0	0	0	0	0	0	0	0	0	0	0
Bacteria_Bacteroidota_Bacteroidia_Flavobacteriales_Flavobacteriaceae_Jejudonia	342	140	32	47	0	0	239	143	57	26	0	0	284	181	46	50	0	0	85	45	45	28	0	0	122	33	0	0	39	0	102	37	0	0	0	0	60	121	136	58	70	85	63	95	91	57	81	99	80
Bacteria_Bacteroidota_Bacteroidia_Flavobacteriales_Flavobacteriaceae_Jejuia	65	38	0	0	0	0	44	44	0	0	0	0	61	37	0	0	0	0	0	0	0	0	0	0	66	0	0	0	0	0	38	0	0	0	0	0	0	0	0	0	0	0	0	0	0	0	0	0	0
Bacteria_Bacteroidota_Bacteroidia_Flavobacteriales_Flavobacteriaceae_Joostella	110	62	20	0	0	0	62	54	61	0	0	0	48	36	0	20	0	0	51	40	25	0	25	0	100	50	0	0	46	0	49	20	0	0	0	0	28	76	87	61	80	63	80	80	67	81	32	58	56
Bacteria_Bacteroidota_Bacteroidia_Flavobacteriales_Flavobacteriaceae_Kordia	275	265	102	180	320	0	240	196	169	206	158	0	296	267	127	197	60	0	1944	1591	1651	1778	249	127	1850	992	1340	1372	576	199	1783	1287	1948	2478	177	60	559	740	725	402	829	891	845	1061	1655	1916	398	590	559
Bacteria_Bacteroidota_Bacteroidia_Flavobacteriales_Flavobacteriaceae_Kriegella	0	0	0	0	0	0	0	0	0	0	0	0	0	0	0	0	0	0	0	0	0	0	0	0	0	0	0	0	0	0	0	0	0	0	0	0	0	0	0	0	0	0	0	0	0	0	0	0	0
Bacteria_Bacteroidota_Bacteroidia_Flavobacteriales_Flavobacteriaceae_Lacinutrix	2264	796	108	0	0	0	1057	468	115	0	0	0	1660	893	0	0	0	0	211	142	0	0	0	0	445	0	0	0	111	0	424	132	0	0	0	0	32	73	73	66	85	79	43	66	76	68	40	47	51
Bacteria_Bacteroidota_Bacteroidia_Flavobacteriales_Flavobacteriaceae_Leeuwenhoekiella	235	191	93	72	0	0	158	189	624	31	0	0	191	155	70	41	0	0	471	392	117	56	0	45	377	201	115	43	174	34	378	334	57	44	0	0	122	171	201	77	149	362	256	215	179	221	117	115	144
Bacteria_Bacteroidota_Bacteroidia_Flavobacteriales_Flavobacteriaceae_Leptobacterium	0	0	0	0	0	0	0	0	0	0	0	0	0	0	0	0	0	0	0	0	0	0	0	0	0	0	0	0	0	0	0	0	0	0	0	0	98	0	0	0	0	0	0	0	0	0	25	0	0
Bacteria_Bacteroidota_Bacteroidia_Flavobacteriales_Flavobacteriaceae_Litoribaculum	0	0	0	0	0	0	0	0	0	0	0	0	0	0	0	0	0	0	65	0	0	0	0	0	0	0	0	0	0	0	0	0	0	0	0	0	0	0	0	0	0	0	0	0	0	0	0	0	0
Bacteria_Bacteroidota_Bacteroidia_Flavobacteriales_Flavobacteriaceae_Lutibacter	60616	75453	26220	29560	1636	446	64881	71481	56234	16732	1115	1244	55188	84221	28369	23021	2574	1060	16087	12387	3283	3754	1122	615	22283	12572	6346	4453	10062	1828	24110	8461	3114	700	72	506	15698	35717	79545	83472	156440	41840	125776	54506	41483	93673	17722	38571	56005
Bacteria_Bacteroidota_Bacteroidia_Flavobacteriales_Flavobacteriaceae_Lutimonas	34053	44805	27609	27114	524	222	36571	40802	41764	10492	377	473	35491	41612	19325	18269	959	604	138685	104178	32886	24098	7708	3811	73231	49863	18320	10867	45169	2457	83665	78328	17728	2391	229	843	3064	12257	15479	6990	8061	9940	8248	10951	8204	4745	5520	11152	13202
Bacteria_Bacteroidota_Bacteroidia_Flavobacteriales_Flavobacteriaceae_Mangrovimonas	0	73	52	31	79	0	46	57	71	60	0	0	0	54	40	29	72	0	0	0	0	0	0	0	0	0	0	0	0	0	0	0	0	0	0	0	0	0	0	0	0	0	0	0	0	0	0	0	0
Bacteria_Bacteroidota_Bacteroidia_Flavobacteriales_Flavobacteriaceae_Maribacter	8662	5663	914	1050	194	58	5778	4236	1851	933	156	146	6638	5729	1861	1171	160	120	3673	2673	1109	830	325	165	3248	1820	1086	669	1083	123	3320	2035	847	337	88	155	3012	3098	1786	917	1304	2347	1845	1739	1647	1014	2029	1751	1192
Bacteria_Bacteroidota_Bacteroidia_Flavobacteriales_Flavobacteriaceae_Mariniflexile	47	0	0	0	0	0	0	0	0	0	0	0	59	0	0	0	0	0	181	205	0	0	0	0	433	158	93	97	142	0	308	105	0	0	0	0	394	703	489	169	143	760	356	702	250	421	596	307	482
Bacteria_Bacteroidota_Bacteroidia_Flavobacteriales_Flavobacteriaceae_Maritimimonas	8278	18232	4818	6265	3846	2459	11232	14750	9471	6781	2882	4300	7834	19999	7515	5653	6404	3025	21791	21567	10445	9158	3422	1763	30839	18905	15007	11015	14488	3731	28146	13365	8207	2984	942	933	9670	9064	11137	7431	16469	16400	13488	5281	1889	1380	7212	7573	9762
Bacteria_Bacteroidota_Bacteroidia_Flavobacteriales_Flavobacteriaceae_Marixanthomonas	118	74	44	25	0	20	99	61	51	0	0	43	171	102	31	0	0	0	98	62	35	28	0	26	84	57	35	34	34	67	99	36	0	0	0	0	0	76	90	35	34	21	14	21	0	28	44	79	81
Bacteria_Bacteroidota_Bacteroidia_Flavobacteriales_Flavobacteriaceae_Meridianimaribacter	661	553	97	47	0	0	620	440	148	0	0	0	686	630	175	65	0	0	291	175	58	0	0	0	419	161	114	62	159	0	364	162	0	0	0	0	0	52	52	0	0	58	28	34	35	19	23	18	23
Bacteria_Bacteroidota_Bacteroidia_Flavobacteriales_Flavobacteriaceae_Mesoflavibacter	569	521	74	0	0	0	444	244	115	62	0	0	524	404	85	89	0	0	345	119	108	113	0	0	224	120	63	46	78	0	331	64	0	0	0	0	69	101	124	44	169	134	112	113	209	148	72	112	63
Bacteria_Bacteroidota_Bacteroidia_Flavobacteriales_Flavobacteriaceae_Mesonia	290	242	60	80	0	0	206	178	141	50	24	0	269	184	86	71	38	0	210	160	64	85	71	30	261	139	74	64	163	36	190	119	49	86	106	43	125	123	107	70	134	107	130	123	176	134	109	102	121
Bacteria_Bacteroidota_Bacteroidia_Flavobacteriales_Flavobacteriaceae_Muricauda	897	1248	861	914	501	240	861	1083	1113	696	380	175	665	1116	844	823	508	186	1154	1148	915	1042	751	252	1452	729	821	729	565	241	1472	679	1162	2034	658	401	496	1153	1809	810	1204	1027	1159	1675	1825	1692	627	1050	1384
Bacteria_Bacteroidota_Bacteroidia_Flavobacteriales_Flavobacteriaceae_Muriicola	228	190	29	29	33	0	233	143	48	53	0	0	272	195	57	0	39	0	1249	1685	401	341	82	30	2800	1873	1182	998	940	119	1442	814	451	107	0	0	522	1555	2299	1580	3434	3949	4542	11113	15701	5841	673	1997	2043
Bacteria_Bacteroidota_Bacteroidia_Flavobacteriales_Flavobacteriaceae_Myroides	7516	10350	8457	8406	5467	3908	8447	8087	7115	6777	4810	3360	8033	8960	6967	58441	7902	3355	4220	7558	11470	6968	4023	2752	6675	5585	7683	7358	5007	2133	4817	5952	7082	6492	3339	3117	1856817	2415601	2160153	1456204	1563283	1708258	1669528	1253056	1239339	1036342	1609870	1938619	1474625
Bacteria_Bacteroidota_Bacteroidia_Flavobacteriales_Flavobacteriaceae_NS2b marine group	1132	1143	436	542	175	102	935	874	690	446	138	79	1037	1104	542	1476	231	65	1220	1013	530	410	239	426	1258	571	458	276	558	133	943	657	301	290	234	310	12325	21999	22376	19270	25921	13198	23770	11298	7541	13681	10949	17177	15667
Bacteria_Bacteroidota_Bacteroidia_Flavobacteriales_Flavobacteriaceae_NS3a marine group	801	776	167	172	52	0	732	518	259	115	53	67	702	842	206	184	0	0	435	390	187	162	0	0	429	223	116	86	160	0	473	242	113	0	0	0	125	190	316	247	420	249	349	229	158	276	121	186	216
Bacteria_Bacteroidota_Bacteroidia_Flavobacteriales_Flavobacteriaceae_NS4 marine group	1820	1706	314	364	135	74	1404	1047	641	215	104	91	1767	1516	392	312	131	63	2825	1341	829	1051	1020	1069	3317	1064	646	447	903	399	5083	836	500	601	745	704	796	1095	1131	605	830	847	794	795	676	568	766	803	850
Bacteria_Bacteroidota_Bacteroidia_Flavobacteriales_Flavobacteriaceae_NS5 marine group	2802	2310	870	1005	508	445	2245	1904	1490	700	377	437	2424	2719	897	1713	402	533	4420	3041	4564	4650	3108	1152	4918	2564	2965	2944	2242	700	6314	1816	5761	6716	2280	1079	25599	43183	39027	23025	31226	39083	34442	42136	33490	23214	22270	30130	29691
Bacteria_Bacteroidota_Bacteroidia_Flavobacteriales_Flavobacteriaceae_Neptunitalea	0	0	0	0	0	0	0	18	18	0	0	0	0	0	0	0	0	0	0	0	0	0	0	0	18	0	0	0	0	0	24	0	0	0	0	0	0	0	0	0	0	0	0	0	0	14	0	0	0
Bacteria_Bacteroidota_Bacteroidia_Flavobacteriales_Flavobacteriaceae_Nonlabens	554	313	67	96	98	62	340	214	164	110	62	65	461	327	124	113	95	47	138	130	269	151	114	59	196	128	269	271	195	39	145	67	131	82	109	110	1240	1901	670	993	1013	1557	1002	1424	1123	363	1776	641	1104
Bacteria_Bacteroidota_Bacteroidia_Flavobacteriales_Flavobacteriaceae_Ochrovirga	35	0	0	0	0	0	23	0	0	0	0	0	35	0	0	0	0	0	0	0	0	0	0	0	0	0	0	0	0	0	45	20	0	0	0	0	0	0	0	0	0	0	0	0	0	0	0	0	0
Bacteria_Bacteroidota_Bacteroidia_Flavobacteriales_Flavobacteriaceae_Olleya	1074	598	130	143	0	0	694	427	253	90	0	0	814	632	121	79	0	0	596	782	177	153	107	0	999	499	235	115	279	72	787	468	92	0	0	124	219	479	1682	3469	3602	555	2634	977	1418	3577	206	647	1426
Bacteria_Bacteroidota_Bacteroidia_Flavobacteriales_Flavobacteriaceae_Pibocella	569	625	67	66	0	0	431	420	769	35	0	0	548	551	76	55	0	0	729	536	153	83	0	0	516	283	89	46	201	0	589	376	100	0	0	0	93	270	227	203	299	239	294	356	318	258	101	155	155
Bacteria_Bacteroidota_Bacteroidia_Flavobacteriales_Flavobacteriaceae_Planktosalinus	183	171	28	48	0	0	168	137	91	40	0	0	189	175	43	28	0	0	419	391	124	87	32	0	345	298	115	107	162	0	362	200	104	42	0	0	155	206	173	91	172	165	158	188	144	136	121	135	145
Bacteria_Bacteroidota_Bacteroidia_Flavobacteriales_Flavobacteriaceae_Polaribacter	6041	6446	1786	2397	410	275	5485	5922	3296	1309	438	379	5614	5362	1667	1597	397	299	5772	2678	2560	2095	1364	731	6773	2174	1152	694	1921	422	9504	1748	986	674	716	818	1716	1627	2014	1245	1775	1301	1671	1791	1272	1154	1100	1298	1480
Bacteria_Bacteroidota_Bacteroidia_Flavobacteriales_Flavobacteriaceae_Postechiella	180	117	0	0	0	0	169	0	0	0	0	0	174	100	0	0	0	0	0	0	0	0	0	0	0	0	0	0	0	0	0	0	0	0	0	0	0	0	0	0	0	0	0	0	0	0	0	0	0
Bacteria_Bacteroidota_Bacteroidia_Flavobacteriales_Flavobacteriaceae_Pricia	280	256	22	22	0	0	219	168	46	0	0	0	278	230	36	23	0	0	90	87	26	22	0	0	85	64	0	20	35	0	126	62	0	0	0	0	360	733	891	701	1652	1625	1842	2346	4682	4279	414	698	985
Bacteria_Bacteroidota_Bacteroidia_Flavobacteriales_Flavobacteriaceae_Pseudofulvibacter	2311	2466	533	579	292	214	1995	1628	999	432	200	291	2020	2557	649	604	298	329	1789	1461	715	521	308	367	1726	973	516	353	1287	225	1764	1335	439	273	307	198	656	1077	1408	892	1208	1094	1291	1297	839	775	643	836	1011
Bacteria_Bacteroidota_Bacteroidia_Flavobacteriales_Flavobacteriaceae_Pseudozobellia	420	367	0	0	0	0	337	174	114	0	0	0	344	287	38	0	0	0	377	166	68	36	34	0	267	105	83	38	161	0	456	163	0	0	0	0	0	23	19	0	0	0	0	0	0	0	0	16	0
Bacteria_Bacteroidota_Bacteroidia_Flavobacteriales_Flavobacteriaceae_Psychroflexus	1694	1449	287	337	61	32	1344	1196	552	308	59	53	1660	1388	445	389	63	38	914	561	262	222	150	270	935	437	253	134	427	201	1114	356	127	77	118	148	775	1592	1943	845	1100	842	924	1118	891	757	834	1292	1314
Bacteria_Bacteroidota_Bacteroidia_Flavobacteriales_Flavobacteriaceae_Psychroserpens	3100	2629	464	425	142	77	2729	1851	880	431	154	0	2810	3127	630	452	128	60	1285	1020	367	348	279	171	2347	1070	744	588	896	151	1483	714	447	147	263	129	164	357	442	267	404	969	369	679	552	711	215	293	442
Bacteria_Bacteroidota_Bacteroidia_Flavobacteriales_Flavobacteriaceae_Pustulibacterium	96	186	197	193	91	44	87	139	136	149	79	36	66	168	165	173	127	44	37	25	45	37	56	20	49	28	66	81	37	0	62	29	34	44	106	0	40	38	0	0	0	0	0	0	14	15	31	13	0
Bacteria_Bacteroidota_Bacteroidia_Flavobacteriales_Flavobacteriaceae_Robertkochia	22	0	0	0	0	0	0	0	0	0	0	0	0	0	0	0	0	0	0	0	0	0	0	0	0	0	0	0	0	0	0	0	0	0	0	0	0	0	0	0	0	0	0	0	0	0	0	0	0
Bacteria_Bacteroidota_Bacteroidia_Flavobacteriales_Flavobacteriaceae_Robiginitalea	5528	4271	393	509	123	41	3977	2420	851	437	101	68	4481	3585	678	472	149	109	12447	10314	4744	3463	1098	409	13515	5583	2371	1568	2793	330	15037	10083	3758	1187	77	198	2362	9487	8354	3664	6582	4945	12072	3608	11131	4475	3304	9054	3129
Bacteria_Bacteroidota_Bacteroidia_Flavobacteriales_Flavobacteriaceae_Sabulilitoribacter	0	0	0	0	0	0	158	0	0	0	0	0	0	171	0	0	0	0	0	0	0	0	0	0	0	0	0	0	0	0	0	0	0	0	0	0	35	137	120	0	67	71	51	236	99	0	43	95	97
Bacteria_Bacteroidota_Bacteroidia_Flavobacteriales_Flavobacteriaceae_Salegentibacter	441	504	186	209	25	0	437	553	491	99	0	0	395	501	159	175	0	0	538	417	113	161	47	28	659	271	158	100	233	71	712	314	90	29	0	0	265	497	551	235	496	535	551	1687	6266	8891	364	420	432
Bacteria_Bacteroidota_Bacteroidia_Flavobacteriales_Flavobacteriaceae_Salinimicrobium	2575	2941	664	943	137	60	2323	2175	1040	462	242	57	2172	2323	851	634	65	72	970	844	445	379	1429	3490	1164	569	427	353	1185	3144	851	582	631	428	2590	3616	490	761	653	763	385	441	506	613	263	201	537	511	341
Bacteria_Bacteroidota_Bacteroidia_Flavobacteriales_Flavobacteriaceae_Sediminibacter	342	370	100	109	0	0	283	207	240	81	0	0	290	343	99	79	0	0	413	363	125	116	0	33	450	229	163	90	202	30	282	299	91	47	0	0	407	1030	1333	583	1204	1029	778	668	822	984	542	852	834
Bacteria_Bacteroidota_Bacteroidia_Flavobacteriales_Flavobacteriaceae_Sediminicola	272	207	60	67	0	0	268	217	94	38	0	0	276	304	96	48	0	0	134	221	92	55	0	0	199	106	89	58	74	0	111	123	73	57	0	0	13	50	53	20	54	67	79	73	87	84	20	46	47
Bacteria_Bacteroidota_Bacteroidia_Flavobacteriales_Flavobacteriaceae_Seonamhaeicola	785	904	159	188	0	0	687	583	350	96	0	0	835	800	234	209	31	0	139	62	0	38	0	0	198	92	38	0	35	0	186	70	0	0	43	0	0	30	22	0	0	26	16	39	0	17	0	19	19
Bacteria_Bacteroidota_Bacteroidia_Flavobacteriales_Flavobacteriaceae_Siansivirga	348	179	0	0	0	0	234	153	66	0	0	0	330	190	32	0	0	0	98	92	0	0	0	0	224	84	61	33	80	0	93	35	0	0	0	0	80	38	55	34	18	21	35	78	72	25	36	42	31
Bacteria_Bacteroidota_Bacteroidia_Flavobacteriales_Flavobacteriaceae_Sinomicrobium	56	31	0	0	0	0	42	22	17	0	0	0	40	38	0	0	0	16	0	0	0	0	0	27	26	0	0	0	0	0	18	0	250	0	0	0	118	61	60	45	48	31	47	34	19	15	61	50	75
Bacteria_Bacteroidota_Bacteroidia_Flavobacteriales_Flavobacteriaceae_Snuella	0	0	0	0	0	0	0	0	0	0	0	0	0	0	0	0	0	0	0	0	0	0	0	0	0	0	0	0	0	0	0	0	0	0	0	0	0	0	0	0	21	0	0	22	0	22	0	0	0
Bacteria_Bacteroidota_Bacteroidia_Flavobacteriales_Flavobacteriaceae_Spongiibacterium	78	0	0	0	0	0	0	0	0	0	0	0	78	0	0	0	0	0	0	0	0	0	0	0	0	0	0	0	0	0	0	0	0	0	0	0	0	0	0	0	0	0	0	0	0	0	0	0	0
Bacteria_Bacteroidota_Bacteroidia_Flavobacteriales_Flavobacteriaceae_Spongiiferula	204	180	46	155	20	0	234	150	61	55	0	0	199	154	535	35	0	0	56	37	23	0	0	0	47	28	0	26	31	0	75	51	0	0	0	0	0	0	17	0	20	0	13	0	0	0	0	0	0
Bacteria_Bacteroidota_Bacteroidia_Flavobacteriales_Flavobacteriaceae_Spongiimicrobium	247	254	45	74	0	0	252	259	105	57	0	0	143	224	42	33	0	0	32	29	0	0	0	0	34	0	0	0	0	0	0	0	0	0	0	0	112	434	756	362	640	665	363	204	617	301	212	445	560
Bacteria_Bacteroidota_Bacteroidia_Flavobacteriales_Flavobacteriaceae_Spongiimonas	330	261	26	0	0	0	169	128	33	0	0	0	170	167	24	0	0	0	0	24	0	0	0	0	23	0	0	0	0	0	0	0	0	0	0	0	10	20	0	10	0	12	0	10	0	0	0	0	0
Bacteria_Bacteroidota_Bacteroidia_Flavobacteriales_Flavobacteriaceae_Spongiivirga	41	0	0	0	0	0	0	0	0	0	0	0	0	36	0	0	0	0	0	0	0	0	0	0	41	0	0	0	0	0	0	0	0	0	0	0	0	31	0	23	0	0	0	0	0	0	0	0	0
Bacteria_Bacteroidota_Bacteroidia_Flavobacteriales_Flavobacteriaceae_Subsaxibacter	2985	1053	57	97	0	0	1880	614	86	153	0	0	2686	1130	82	58	51	0	309	105	111	104	62	0	449	130	119	102	91	0	474	66	0	0	0	0	982	1470	893	531	859	764	528	697	1098	900	1187	1096	735
Bacteria_Bacteroidota_Bacteroidia_Flavobacteriales_Flavobacteriaceae_Subsaximicrobium	87	71	0	0	0	0	35	34	0	0	0	0	67	78	0	0	0	0	0	0	0	0	0	0	73	35	33	0	33	0	62	34	0	0	0	0	420	801	682	264	599	691	547	1148	1130	943	479	576	460
Bacteria_Bacteroidota_Bacteroidia_Flavobacteriales_Flavobacteriaceae_Sungkyunkwania	102	86	40	34	0	0	95	98	63	24	0	0	86	97	29	30	17	0	94	94	41	34	0	0	96	53	33	0	115	0	74	67	22	0	0	0	21	58	49	27	51	52	48	60	44	27	22	40	31
Bacteria_Bacteroidota_Bacteroidia_Flavobacteriales_Flavobacteriaceae_Tamlana	1685	1327	1113	1409	405	0	1632	1467	1126	894	191	0	1530	1801	973	1084	528	63	192	132	0	0	0	0	129	62	0	0	52	0	188	50	0	0	0	0	224	338	192	80	113	94	108	256	160	48	234	202	135
Bacteria_Bacteroidota_Bacteroidia_Flavobacteriales_Flavobacteriaceae_Tenacibaculum	4235	3486	966	1138	163	141	3151	2603	2310	856	292	439	3377	3040	1073	827	176	187	3125	2053	1673	1598	1506	432	2789	1534	1844	1170	1583	454	3307	1523	1212	1070	601	710	1097	1166	1690	1534	1174	763	1208	979	877	792	763	974	1101
Bacteria_Bacteroidota_Bacteroidia_Flavobacteriales_Flavobacteriaceae_Ulvibacter	9471	11555	4004	4134	598	242	8883	7997	5027	2638	351	306	8215	11453	4452	3251	824	463	30375	15099	5229	4722	1359	489	20043	9384	4529	2455	7516	1150	20015	8642	1698	524	99	213	8552	14535	15176	16027	29247	7673	22456	7316	6704	18716	11608	9101	11971
Bacteria_Bacteroidota_Bacteroidia_Flavobacteriales_Flavobacteriaceae_Vitellibacter	86	73	44	38	0	0	78	73	41	0	0	63	99	72	0	42	0	0	142	254	71	50	0	0	308	144	122	50	125	0	210	127	0	0	0	0	41	83	109	67	118	117	99	171	167	147	79	89	69
Bacteria_Bacteroidota_Bacteroidia_Flavobacteriales_Flavobacteriaceae_Wenyingzhuangia	704	436	0	0	0	0	534	305	35	0	0	0	642	307	41	0	0	0	42	0	0	0	0	0	49	30	0	0	0	0	78	0	0	0	0	0	35	16	16	0	0	12	20	26	18	17	0	12	0
Bacteria_Bacteroidota_Bacteroidia_Flavobacteriales_Flavobacteriaceae_Winogradskyella	6554	6199	1043	1122	197	100	4956	4293	1910	661	118	155	5804	6313	1523	801	131	144	6020	3026	1246	1003	541	197	4995	2390	1130	739	1493	221	6006	2432	745	242	0	161	2340	3378	2084	811	1714	1371	1273	1365	1452	1304	2728	2185	1442
Bacteria_Bacteroidota_Bacteroidia_Flavobacteriales_Flavobacteriaceae_Xanthomarina	52	38	0	0	0	0	41	0	0	0	0	0	31	38	0	0	0	0	0	0	0	0	0	0	41	0	0	0	0	0	0	0	0	0	0	0	13	0	20	0	14	21	14	35	26	0	21	15	20
Bacteria_Bacteroidota_Bacteroidia_Flavobacteriales_Flavobacteriaceae_Yeosuana	0	0	0	36	0	0	0	33	0	0	0	0	0	0	0	0	0	0	0	0	0	0	0	0	44	0	0	0	0	0	62	0	0	0	0	0	0	0	0	0	0	0	0	0	0	0	0	0	0
Bacteria_Bacteroidota_Bacteroidia_Flavobacteriales_Flavobacteriaceae_Zeaxanthinibacter	725	429	62	67	30	0	441	237	96	90	28	0	514	379	99	48	41	0	1133	663	528	534	136	56	1541	592	310	192	301	24	1814	473	286	243	0	0	339	1506	1345	655	1107	843	2181	632	1831	515	474	1616	473
Bacteria_Bacteroidota_Bacteroidia_Flavobacteriales_Flavobacteriaceae_Zhouia	0	22	0	0	0	0	0	35	37	0	0	0	0	0	0	0	39	0	0	24	0	0	0	0	0	0	0	0	0	0	0	0	0	0	0	0	12	19	0	0	0	0	0	0	0	0	0	0	17
Bacteria_Bacteroidota_Bacteroidia_Flavobacteriales_Flavobacteriaceae_Zobellia	133	89	0	0	0	0	96	51	152	0	0	0	111	146	0	48	0	0	100	0	86	0	376	694	184	0	50	0	246	426	198	0	0	0	745	924	74	35	24	0	30	30	19	45	45	34	42	27	21
Bacteria_Bacteroidota_Bacteroidia_Flavobacteriales_Flavobacteriaceae_Zunongwangia	1307	985	174	215	0	0	1060	658	450	121	0	0	1123	903	165	112	33	0	437	396	121	121	52	37	798	322	140	95	316	45	361	255	55	0	0	0	171	384	405	161	321	367	296	558	249	217	166	225	287
Bacteria_Bacteroidota_Bacteroidia_Flavobacteriales_Flavobacteriaceae_uncultured	26012	27465	15030	15680	1972	926	25228	24122	45307	9607	1375	1200	24883	29972	14386	12507	2435	1249	15037	9871	4630	4489	2224	1087	15115	7154	4259	2585	5739	1043	20195	7601	3120	1687	1156	1145	9336	14827	12833	7047	10878	11812	10279	14054	10799	8997	9534	10009	9260
Bacteria_Bacteroidota_Bacteroidia_Flavobacteriales_Flavobacteriales Incertae Sedis_Ichthyobacterium	521	206	48	55	0	0	205	186	169	36	0	0	270	245	69	59	0	0	666	241	275	218	117	32	651	207	257	101	130	39	695	97	82	54	56	0	120	539	500	303	166	117	45	174	18	28	293	482	468
Bacteria_Bacteroidota_Bacteroidia_Flavobacteriales_Schleiferiaceae_Schleiferia	4126	3588	1041	1294	1323	771	3048	2470	1800	1260	1266	684	3416	2910	1220	1164	1316	854	6464	3919	3919	3629	1327	1042	6919	3590	3714	3207	2560	972	8069	2678	2411	3884	589	503	17652	5510	1781	568	1317	733	590	267	166	104	6549	2522	1425
Bacteria_Bacteroidota_Bacteroidia_Flavobacteriales_Weeksellaceae_Apibacter	435	289	105	137	144	29	305	241	129	101	42	0	375	214	112	93	142	39	77	104	18	23	18	0	54	16	24	0	30	18	51	64	22	0	46	0	198	78	12	0	18	31	22	13	17	14	120	27	24
Bacteria_Bacteroidota_Bacteroidia_Flavobacteriales_Weeksellaceae_Bergeyella	534	679	307	331	272	209	533	527	425	316	208	156	549	537	358	386	242	183	406	310	208	185	158	112	357	305	222	201	336	180	356	215	185	218	123	101	401	382	330	203	251	199	188	160	171	148	293	288	248
Bacteria_Bacteroidota_Bacteroidia_Flavobacteriales_Weeksellaceae_Chishuiella	262	199	38	62	0	0	218	171	910	0	0	0	227	185	25	39	26	0	94	0	0	0	0	0	76	40	0	0	0	0	147	23	0	0	0	0	25	19	14	0	0	0	13	15	0	0	20	14	13
Bacteria_Bacteroidota_Bacteroidia_Flavobacteriales_Weeksellaceae_Chryseobacterium	1996	2790	1687	2045	736	414	2285	2638	1378	1109	613	368	1960	2564	1400	1424	542	377	1350	1094	755	786	455	395	1975	949	882	633	785	326	1674	819	583	459	481	323	5145	1733	1316	1067	975	821	923	799	816	502	2006	1122	1060
Bacteria_Bacteroidota_Bacteroidia_Flavobacteriales_Weeksellaceae_Cloacibacterium	804	829	383	412	210	199	709	579	506	336	268	213	738	756	432	472	211	199	655	593	375	303	480	426	583	403	312	273	362	312	801	340	271	328	370	396	757	962	674	417	516	448	400	393	289	240	655	534	546
Bacteria_Bacteroidota_Bacteroidia_Flavobacteriales_Weeksellaceae_Cruoricaptor	0	0	0	0	0	0	0	0	0	0	0	0	0	0	0	0	0	0	0	0	0	0	0	0	0	0	0	0	0	0	0	0	0	0	0	0	0	0	12	0	0	0	0	0	0	0	0	0	0
Bacteria_Bacteroidota_Bacteroidia_Flavobacteriales_Weeksellaceae_Elizabethkingia	48	63	41	60	0	0	83	56	45	52	19	0	37	42	26	206	0	0	60	47	51	26	0	0	95	36	39	0	33	0	47	22	37	0	0	0	668	226	101	39	76	101	62	66	29	20	292	85	82
Bacteria_Bacteroidota_Bacteroidia_Flavobacteriales_Weeksellaceae_Empedobacter	0	0	0	0	0	0	0	0	0	0	0	0	0	0	0	0	0	0	43	0	0	0	0	0	0	0	0	0	0	0	38	0	0	0	0	0	74	102	75	70	81	41	60	54	64	39	67	58	49
Bacteria_Bacteroidota_Bacteroidia_Flavobacteriales_Weeksellaceae_Moheibacter	1641	2115	1106	995	22	0	1923	1731	982	207	42	37	1526	1906	715	395	57	0	586	506	149	134	44	28	668	255	216	91	234	57	918	335	48	24	0	24	303	155	124	104	78	87	81	64	41	37	174	94	110
Bacteria_Bacteroidota_Bacteroidia_Flavobacteriales_Weeksellaceae_Ornithobacterium	199	98	58	77	254	246	167	111	82	176	271	166	213	123	74	74	336	232	144	60	127	68	154	285	296	80	147	89	183	85	129	43	84	126	86	65	80	95	64	34	34	26	21	24	10	0	74	84	49
Bacteria_Bacteroidota_Bacteroidia_Flavobacteriales_Weeksellaceae_Riemerella	0	0	0	0	0	0	0	44	0	0	0	0	0	0	0	0	0	0	0	0	65	76	37	0	0	0	0	0	0	0	262	0	0	0	0	0	59	61	46	30	50	52	27	31	17	0	48	38	43
Bacteria_Bacteroidota_Bacteroidia_Flavobacteriales_Weeksellaceae_Soonwooa	55	0	0	0	0	0	0	31	0	0	0	0	42	34	0	0	0	0	0	0	0	0	0	0	0	0	0	0	0	0	0	0	0	0	0	0	125	24	28	0	0	13	0	0	0	0	39	18	25
Bacteria_Bacteroidota_Bacteroidia_Flavobacteriales_Weeksellaceae_Wautersiella	0	151	48	0	0	0	163	145	57	0	0	0	0	190	62	0	0	0	0	0	0	0	0	0	0	0	0	0	0	0	58	0	0	0	0	0	0	0	0	0	0	0	0	0	0	0	0	0	0
Bacteria_Bacteroidota_Bacteroidia_Flavobacteriales_Weeksellaceae_Weeksella	194	206	175	166	0	0	197	194	182	49	0	0	183	284	153	68	25	0	70	39	32	17	19	47	118	44	56	0	61	27	132	30	0	0	20	32	53	50	49	30	49	55	48	34	24	15	38	26	54
Bacteria_Bacteroidota_Bacteroidia_Flavobacteriales_Weeksellaceae_uncultured	257	234	57	54	0	0	210	148	84	58	22	0	256	209	43	94	0	0	223	110	77	77	38	0	183	57	47	29	98	0	153	70	24	28	0	36	267	176	129	76	89	92	90	123	76	59	130	106	98
Bacteria_Bacteroidota_Bacteroidia_Sphingobacteriales_Lentimicrobiaceae_Lentimicrobium	26222	55706	69599	83156	71321	22836	37791	57105	93136	67373	54867	17196	23215	55839	61875	70604	62196	22538	153981	194287	95695	87137	25864	24364	159471	123433	83855	62397	70724	22151	152450	148014	88936	95776	17115	18670	94798	174598	192019	133355	197059	196373	175396	110791	85254	37911	100515	119656	161479
Bacteria_Bacteroidota_Bacteroidia_Sphingobacteriales_Sphingobacteriaceae_Anseongella	34	32	0	0	0	0	35	20	0	0	0	0	37	24	0	0	0	0	0	0	0	0	0	0	0	0	0	0	0	0	0	0	0	0	0	0	0	0	0	0	0	0	0	0	0	0	0	0	0
Bacteria_Bacteroidota_Bacteroidia_Sphingobacteriales_Sphingobacteriaceae_Arcticibacter	191	165	36	0	0	0	142	130	73	43	0	0	128	120	52	0	0	0	134	84	25	132	33	0	100	56	39	0	32	0	194	72	40	21	79	26	153	496	316	150	81	28	23	18	0	0	310	229	307
Bacteria_Bacteroidota_Bacteroidia_Sphingobacteriales_Sphingobacteriaceae_Mucilaginibacter	597	799	454	520	476	511	655	675	569	406	570	839	637	834	567	748	381	455	579	707	700	599	563	343	556	524	447	476	508	295	738	412	555	513	383	325	634	583	444	229	295	278	265	175	158	128	450	365	280
Bacteria_Bacteroidota_Bacteroidia_Sphingobacteriales_Sphingobacteriaceae_Nubsella	541	89	46	33	0	0	192	67	61	36	0	0	533	72	0	0	0	0	43	55	35	0	0	0	51	36	0	0	37	0	46	38	0	0	0	0	0	24	36	36	38	20	27	21	18	0	0	37	27
Bacteria_Bacteroidota_Bacteroidia_Sphingobacteriales_Sphingobacteriaceae_Olivibacter	116	92	69	83	79	0	83	100	99	63	80	21	157	119	82	96	53	23	224	238	89	66	25	23	249	166	93	44	84	0	372	132	119	75	20	0	211	233	288	135	169	169	147	96	50	24	181	186	178
Bacteria_Bacteroidota_Bacteroidia_Sphingobacteriales_Sphingobacteriaceae_Parapedobacter	78	182	193	220	45	0	115	164	172	117	39	18	83	200	143	226	61	0	58	53	24	25	28	35	32	28	31	0	0	46	43	67	27	35	35	58	29	67	158	65	69	100	65	170	40	26	39	57	84
Bacteria_Bacteroidota_Bacteroidia_Sphingobacteriales_Sphingobacteriaceae_Pedobacter	3176	3183	916	999	952	406	2783	2500	1511	921	1040	484	2980	3093	1010	1543	1192	445	2758	2157	1525	1271	925	1018	2512	1284	1093	885	1399	639	4412	1558	959	1270	776	699	2185	2639	2183	1225	2480	2200	1970	893	982	566	1839	1931	1535
Bacteria_Bacteroidota_Bacteroidia_Sphingobacteriales_Sphingobacteriaceae_Pelobium	0	0	0	0	0	0	0	0	0	0	0	0	0	0	0	0	0	0	0	0	0	0	0	0	0	0	0	0	0	0	0	0	0	0	0	0	11	0	0	0	0	0	0	0	0	0	18	0	0
Bacteria_Bacteroidota_Bacteroidia_Sphingobacteriales_Sphingobacteriaceae_Pseudopedobacter	100	61	20	0	0	0	66	36	28	0	0	260	55	42	0	24	0	60	24	46	104	66	0	0	61	126	69	96	20	0	28	27	22	28	0	0	136	579	697	269	297	219	137	62	40	18	246	382	347
Bacteria_Bacteroidota_Bacteroidia_Sphingobacteriales_Sphingobacteriaceae_Solitalea	660	593	82	118	31	31	574	360	160	70	70	279	565	566	114	103	0	76	241	123	98	179	1291	842	140	81	144	125	331	1746	244	98	166	388	1162	4340	1176	1549	435	203	170	145	135	76	47	40	1084	728	391
Bacteria_Bacteroidota_Bacteroidia_Sphingobacteriales_Sphingobacteriaceae_Sphingobacterium	1613	1535	774	923	868	888	1074	1121	774	626	658	679	1309	1304	791	1108	738	635	1274	965	993	976	741	452	997	786	936	810	702	431	2066	756	893	1175	498	359	1519	1153	840	1054	662	672	734	774	381	295	961	724	709
Bacteria_Bacteroidota_Bacteroidia_Sphingobacteriales_Sphingobacteriaceae_uncultured	721	358	151	213	122	33	503	241	201	154	115	37	804	315	131	190	136	68	1853	1636	586	407	334	246	1530	952	533	326	517	190	1849	1095	445	252	213	307	239	371	224	142	223	221	150	70	49	41	216	252	167
Bacteria_Bacteroidota_Chlorobia_Chlorobiales_Chlorobiaceae_Chlorobaculum	52	34	26	31	348	82	45	36	42	69	244	88	39	32	30	45	198	101	626	109	147	131	42	0	485	81	23	0	41	0	1213	30	0	19	0	32	28	30	58	23	37	59	33	0	0	28	15	23	62
Bacteria_Bacteroidota_Chlorobia_Chlorobiales_Chlorobiaceae_Chlorobium	210	255	169	265	233	197	203	212	353	202	144	170	127	329	168	215	218	162	385	834	190	238	299	118	384	237	192	144	217	194	405	604	268	197	210	86	1336	822	699	499	956	823	962	415	592	459	639	638	938
Bacteria_Bacteroidota_Chlorobia_Chlorobiales_Chlorobiaceae_Prosthecochloris	19	0	0	0	0	0	0	0	0	0	0	0	0	16	0	0	0	0	5039	890	1430	1715	268	58	6172	718	165	25	125	0	10090	234	111	23	26	83	0	15	22	17	30	0	0	0	22	0	0	11	16
Bacteria_Bacteroidota_Chlorobia_Chlorobiales_Chloroherpetonaceae_Chloroherpeton	32	100	26	35	0	0	59	99	27	0	0	0	33	121	34	28	0	0	0	0	0	0	73	67	0	0	0	0	30	175	0	0	20	0	74	129	275	113	86	101	104	54	115	134	102	29	88	70	45
Bacteria_Bacteroidota_Chlorobia_Chlorobiales_Chloroherpetonaceae_GBChlB	117	128	94	72	70	122	75	57	66	89	98	63	84	110	100	98	95	88	156	179	73	64	55	63	111	105	62	49	60	25	105	83	93	35	43	74	20	71	101	47	61	76	62	68	84	54	38	86	47
Bacteria_Bacteroidota_Ignavibacteria_Ignavibacteriales_Ignavibacteriaceae_Ignavibacterium	2464	3930	4275	5010	8425	5270	2761	3472	4849	4790	5879	3109	1758	3742	4316	4827	10217	5283	19832	28158	21854	19283	3371	2659	27462	23133	24510	20090	9780	3091	13265	16909	16428	23072	1531	1065	16536	85258	107019	46910	91541	93015	78970	45900	44735	58101	43482	72034	72875
Bacteria_Bacteroidota_Ignavibacteria_Ignavibacteriales_Melioribacteraceae_IheB3-7	14238	24011	22499	25049	18359	8222	18067	23402	24595	18053	20994	8688	11225	23397	20823	20322	28271	12032	72733	73748	35867	33447	38670	16530	71420	47998	38253	28336	26026	10155	72309	48436	43123	36264	49664	14472	84742	71819	44555	21808	29876	27767	22518	11299	8246	19342	58121	40846	36404
Bacteria_Bacteroidota_Ignavibacteria_Ignavibacteriales_Melioribacteraceae_Melioribacter	1535	1488	2068	1691	2538	2933	1405	1887	1246	1491	2686	2685	1453	1306	2034	1898	2372	2696	10758	12030	15040	9517	1612	1216	11886	14358	11155	13353	4871	1528	10039	14661	19158	6058	489	524	2830	928	848	398	827	488	265	121	175	323	1067	653	793
Bacteria_Bacteroidota_Kryptonia_Kryptoniales_Kryptoniaceae_Candidatus Kryptobacter	0	0	0	0	0	0	0	0	0	0	0	0	0	0	0	0	0	0	0	0	0	0	39	0	0	0	0	0	0	0	0	0	0	0	0	0	0	185	212	0	75	0	32	0	0	0	0	185	200
Bacteria_Bacteroidota_Kryptonia_Kryptoniales_Kryptoniaceae_Candidatus Kryptonium	60	91	88	78	84	66	70	89	90	60	67	31	43	76	89	95	64	55	38	77	56	48	0	0	36	60	37	46	0	0	0	45	32	49	0	0	37	0	0	0	0	0	0	0	0	0	82	0	0
Bacteria_Bacteroidota_Kryptonia_Kryptoniales_Kryptoniaceae_Candidatus Thermokryptus	56	0	0	0	0	0	23	0	0	0	0	0	44	0	0	0	0	0	0	0	0	0	0	0	0	0	0	0	0	0	0	0	0	0	0	0	0	0	0	0	0	0	0	0	0	0	0	0	0
Bacteria_Bacteroidota_Rhodothermia_Balneolales_Balneolaceae_Aliifodinibius	0	68	65	132	460	671	0	71	90	150	347	444	67	68	77	52	507	627	123	439	670	1077	542	212	316	484	898	709	554	161	110	221	571	1056	347	121	69	59	37	27	45	32	53	21	29	27	50	39	36
Bacteria_Bacteroidota_Rhodothermia_Balneolales_Balneolaceae_B2706-C7	23	0	0	0	0	0	0	0	0	0	0	0	0	0	0	0	0	0	38	65	209	244	143	155	31	53	226	213	90	153	35	48	289	324	222	98	10	0	0	0	0	0	0	0	0	0	13	0	0
Bacteria_Bacteroidota_Rhodothermia_Balneolales_Balneolaceae_Balneola	890	765	192	261	204	104	676	623	314	192	139	79	650	710	211	188	250	99	1462	1493	1322	1134	960	459	2120	1397	799	888	571	180	3231	986	1484	864	575	781	224	312	235	151	98	105	72	108	93	67	189	220	160
Bacteria_Bacteroidota_Rhodothermia_Balneolales_Balneolaceae_CK06-06-Mud-MAS4B-21	16	20	0	0	0	0	24	0	0	0	0	0	0	27	0	0	0	0	48	59	31	24	30	0	34	30	25	19	17	0	30	0	18	0	89	0	27	23	24	15	13	12	15	14	0	0	10	20	10
Bacteria_Bacteroidota_Rhodothermia_Balneolales_Balneolaceae_F1-37X2	18	0	0	0	47	290	0	0	0	0	83	322	0	0	0	0	37	260	366	387	622	665	454	190	168	178	285	348	269	57	174	237	691	813	643	392	12	11	11	0	0	0	0	0	0	0	15	0	0
Bacteria_Bacteroidota_Rhodothermia_Balneolales_Balneolaceae_Fodinibius	0	0	0	23	16	0	0	0	22	0	0	0	0	0	0	0	0	0	20	0	0	0	0	0	23	0	0	0	0	0	36	0	0	0	0	0	0	0	0	0	0	0	0	0	0	0	0	0	0
Bacteria_Bacteroidota_Rhodothermia_Balneolales_Balneolaceae_Gracilimonas	55	45	36	41	34	19	41	49	31	32	0	76	54	52	26	44	27	0	122	203	98	75	0	24	187	112	72	52	44	40	146	121	70	73	56	0	555	2361	998	794	1186	978	1092	2025	2503	1694	1047	842	921
Bacteria_Bacteroidota_Rhodothermia_Balneolales_Balneolaceae_HK-RBC54	0	0	0	0	0	0	0	0	0	0	0	0	0	0	0	0	0	0	18	0	0	0	0	0	0	0	0	0	0	0	0	0	0	0	0	0	0	0	0	0	0	0	0	0	0	0	0	0	0
Bacteria_Bacteroidota_Rhodothermia_Balneolales_Balneolaceae_MAT-CR-P4-C12	16	37	21	25	18	0	25	0	28	0	0	0	15	41	16	61	45	0	45	29	19	19	0	0	29	15	0	0	0	0	67	30	0	24	0	0	11	22	22	0	14	13	0	0	0	0	21	11	14
Bacteria_Bacteroidota_Rhodothermia_Balneolales_Balneolaceae_ML310M-34	0	0	0	0	0	0	0	0	0	0	0	0	0	0	0	0	0	0	0	0	0	0	0	0	0	0	0	0	0	0	0	0	15	0	0	0	106	29	0	13	0	0	0	0	0	0	50	0	16
Bacteria_Bacteroidota_Rhodothermia_Balneolales_Balneolaceae_Rhodohalobacter	186	156	64	90	98	70	191	113	87	87	101	35	138	146	82	682	156	60	53	84	118	79	49	42	67	51	56	65	46	46	52	70	53	44	90	23	0	19	21	0	0	47	14	0	11	0	15	16	0
Bacteria_Bacteroidota_Rhodothermia_Balneolales_Balneolaceae_Soortia	88	41	0	0	0	0	61	32	0	0	0	0	71	36	0	0	0	0	259	43	99	74	29	0	468	65	22	0	0	0	694	19	0	0	0	0	27	0	0	0	0	0	0	0	0	0	19	0	0
Bacteria_Bacteroidota_Rhodothermia_Balneolales_Balneolaceae_uncultured	1027	1197	640	749	720	518	879	790	769	572	433	564	888	964	625	762	524	575	766	928	734	639	632	522	867	704	644	662	651	521	870	628	825	883	506	294	2362	1253	1392	1387	1106	1023	784	560	533	498	1539	928	1232
Bacteria_Bacteroidota_Rhodothermia_Rhodothermales_Rhodothermaceae_Longimonas	106	121	68	82	79	41	102	106	58	65	164	49	115	125	96	98	68	62	55	119	42	0	70	0	105	76	0	53	35	33	0	36	46	0	0	50	30	28	60	28	30	38	31	17	18	18	0	34	31
Bacteria_Bacteroidota_Rhodothermia_Rhodothermales_Rhodothermaceae_Rhodothermus	38	92	75	85	69	62	76	86	76	105	88	79	36	74	73	112	46	52	44	34	52	56	170	105	36	17	32	48	53	53	17	19	51	55	165	99	13	56	51	23	77	62	56	64	96	84	32	59	36
Bacteria_Bacteroidota_Rhodothermia_Rhodothermales_Rhodothermaceae_Rubricoccus	105	31	0	15	15	27	45	23	0	22	0	18	77	24	0	0	24	25	21	19	134	181	328	108	31	30	79	102	101	36	16	0	188	242	464	504	0	31	20	16	26	43	18	11	0	13	0	16	24
Bacteria_Bacteroidota_Rhodothermia_Rhodothermales_Rhodothermaceae_Rubrivirga	379	418	272	245	54	31	346	388	204	142	70	16	338	429	235	217	37	16	66	79	57	36	17	21	133	55	27	30	17	0	109	69	24	17	0	0	412	902	83	36	39	27	32	46	87	121	1174	284	99
Bacteria_Bacteroidota_Rhodothermia_Rhodothermales_Rhodothermaceae_Salinibacter	3711	3699	2343	2562	3097	4060	3166	2862	2336	2998	3800	4415	2995	3158	2363	3265	2293	4286	2042	2276	2346	2302	2129	1744	2457	1886	2130	2271	2597	2273	2113	1561	2521	2508	1609	1456	7578	9826	6582	1608	2067	2295	1927	1907	2184	1988	2937	3460	2427
Bacteria_Bacteroidota_Rhodothermia_Rhodothermales_Rhodothermaceae_Salisaeta	281	199	36	37	0	52	229	112	47	0	0	77	215	162	64	20	0	39	200	37	86	107	47	85	271	74	49	0	71	44	326	0	0	22	23	29	0	21	19	0	0	16	28	11	0	14	20	0	17
Bacteria_Bacteroidota_Rhodothermia_Rhodothermales_Rhodothermaceae_uncultured	79195	85346	47782	52585	27983	7933	71898	70413	52081	40828	20296	5609	63440	72777	48125	44628	30407	6972	21768	19283	5806	6068	4141	3440	31478	15056	8658	5433	8207	4025	20736	11316	3032	4138	2954	2518	12776	32906	27426	6935	7124	7270	7211	5343	7706	12914	21614	21364	12591
Bacteria_Bdellovibrionota_Bdellovibrionia_Bacteriovoracales_Bacteriovoracaceae_Bacteriovorax	2394	1679	180	213	59	35	1679	969	624	289	84	75	1953	1277	263	276	84	51	349	331	297	213	119	186	330	178	173	101	214	64	634	186	141	99	153	114	894	1727	721	381	1104	931	1308	357	1359	296	1568	955	1057
Bacteria_Bdellovibrionota_Bdellovibrionia_Bacteriovoracales_Bacteriovoracaceae_Halobacteriovorax	11468	8296	1634	2483	1400	268	8048	6421	4513	2218	416	345	9704	7099	2602	2182	748	339	2866	2767	1441	1223	851	696	2894	2099	3078	1285	5116	765	3829	2033	1170	771	570	306	2158	1834	978	629	673	649	545	691	789	389	1362	990	809
Bacteria_Bdellovibrionota_Bdellovibrionia_Bacteriovoracales_Bacteriovoracaceae_Peredibacter	55823	35674	6902	8830	4363	1846	36041	25513	15975	10323	2995	2038	47583	30349	8816	7586	4666	2149	19795	11196	7984	8234	3306	2302	19537	8665	7793	4987	7639	2249	26223	6805	4532	3751	2589	1362	24513	19035	10246	5173	5205	4352	4277	2568	5166	2693	18296	12415	8221
Bacteria_Bdellovibrionota_Bdellovibrionia_Bacteriovoracales_Bacteriovoracaceae_uncultured	66692	44002	18333	19557	5519	1738	39881	31082	28175	16340	2953	1620	53904	34937	17843	14851	4823	2212	10857	7659	5668	6087	1774	1217	13511	6851	6580	4452	5390	1562	15502	4806	4341	3322	1433	1781	10381	9321	3768	1442	1333	1009	878	1056	1101	459	9309	4204	2775
Bacteria_Bdellovibrionota_Bdellovibrionia_Bdellovibrionales_Bdellovibrionaceae_Bdellovibrio	33893	25580	10581	14902	10317	6121	24854	20194	14494	11286	8041	5158	28771	21515	12500	11215	12559	7219	15012	14312	8388	7360	8083	4534	15192	11193	7465	6532	6846	4357	13367	9704	6949	6282	5792	3756	22001	39992	20682	10233	14020	15119	16102	48038	36319	12782	29836	19695	14340
Bacteria_Bdellovibrionota_Bdellovibrionia_Bdellovibrionales_Bdellovibrionaceae_OM27 clade	214802	189483	30676	42335	20442	5955	183657	137892	52822	41678	11820	6898	165624	150543	44534	33831	18709	6743	70251	67372	30692	27651	13161	7384	82450	51219	38887	28124	34050	10009	91215	45248	22125	19263	8965	5037	59337	132997	82185	35453	32661	25392	20266	17421	11509	8873	88427	72669	50549
Bacteria_Bdellovibrionota_Bdellovibrionia_Bdellovibrionales_Bdellovibrionaceae_uncultured	1295	709	87	97	96	81	691	425	124	83	162	120	1019	531	133	58	153	74	48	75	47	50	379	142	49	77	63	44	264	216	39	38	48	42	39	132	34	93	74	80	165	124	72	25	69	82	76	87	69
Bacteria_Bdellovibrionota_Oligoflexia_Oligoflexales_Oligoflexaceae_Oligoflexus	432	363	162	147	55	92	325	301	130	103	56	50	357	300	120	132	120	114	165	132	93	57	43	28	219	183	82	80	78	37	233	86	80	25	29	0	842	1872	1886	876	509	703	548	443	230	228	1440	1589	896
Bacteria_Bdellovibrionota_Oligoflexia_Oligoflexales_Oligoflexaceae_Pseudobacteriovorax	1852	870	154	141	21	0	919	561	166	121	23	27	1666	664	142	99	27	0	486	204	93	89	18	0	600	277	214	109	87	29	782	140	58	21	0	0	446	443	267	195	206	300	164	182	72	86	375	366	221
Bacteria_Bdellovibrionota_Oligoflexia_Oligoflexales_Oligoflexaceae_uncultured	149155	57465	17776	18000	11850	8979	72237	46843	19765	16358	16938	8219	101110	41805	18312	16718	15606	9081	25766	21314	11945	11890	7515	3261	33343	21014	15491	13278	22417	6807	26793	15202	10327	8087	4308	3493	26274	33750	25355	9951	12120	11924	9646	4818	5034	4381	24522	24131	13476
Bacteria_Bdellovibrionota_Oligoflexia_Silvanigrellales_Silvanigrellaceae_Candidatus Turbabacter	0	0	0	0	0	0	0	0	0	0	0	0	0	0	0	0	0	0	64	0	0	0	0	0	128	0	0	0	0	0	114	0	0	0	0	0	266	78	21	0	0	0	0	0	0	0	138	57	21
Bacteria_Bdellovibrionota_Oligoflexia_Silvanigrellales_Silvanigrellaceae_Silvanigrella	231	221	138	229	162	155	235	184	166	145	144	252	229	202	135	161	140	176	168	164	220	174	164	152	619	282	304	230	225	88	184	111	133	191	176	61	2901	1294	477	247	412	359	349	247	209	98	1626	526	542
Bacteria_Bdellovibrionota_Oligoflexia_Silvanigrellales_Silvanigrellaceae_uncultured	258	222	77	128	74	86	152	211	129	151	73	69	185	228	106	132	106	98	326	206	382	365	165	151	603	290	336	365	304	49	952	236	224	352	91	115	13352	4077	673	369	873	444	612	474	263	314	5695	1280	1089
Bacteria_Caldatribacteriota_Caldatribacteriia_Caldatribacteriales_Caldatribacteriaceae_Candidatus Caldatribacterium	486	511	421	529	913	1690	485	413	372	471	1248	1702	309	464	412	393	677	1580	363	561	611	574	1024	391	357	472	578	602	714	211	283	403	768	783	854	378	409	304	722	564	693	504	383	241	223	263	181	441	541
Bacteria_Caldisericota_Caldisericia_Caldisericales_Caldisericaceae_Caldisericum	215	326	205	302	182	203	201	264	217	257	171	249	174	281	242	340	244	192	332	249	227	225	253	246	472	295	239	228	322	408	466	153	187	224	191	187	142	333	388	159	205	233	180	143	114	145	208	285	237
Bacteria_Calditrichota_Calditrichia_Calditrichales_Calditrichaceae_Caldithrix	42662	62970	52644	60426	93426	95006	49801	57436	58159	54602	87839	95058	33991	55938	51527	47833	121519	99439	94276	164812	174476	211016	362235	267443	123070	118435	164910	161726	203361	141039	85916	104094	159693	258021	331097	307106	15711	98567	120868	70881	129867	130959	127838	95690	111877	134791	50202	86570	98917
Bacteria_Calditrichota_Calditrichia_Calditrichales_Calditrichaceae_Calorithrix	2831	4283	4797	6311	18996	22299	3305	4528	6243	9444	16679	15154	2213	3658	4715	5472	24727	27745	13667	25932	36751	43618	52344	32251	16074	17480	29264	29822	31725	17191	9681	13651	27150	54069	48129	21684	1887	13040	16598	8036	16132	14655	13383	6842	13098	29605	6871	11643	11978
Bacteria_Calditrichota_Calditrichia_Calditrichales_Calditrichaceae_JdFR-76	7992	11324	9042	11440	36946	38100	9474	11162	12298	14072	35879	43420	6030	9615	10092	10118	30369	37043	7301	15512	32752	43199	46842	25763	10995	13434	30697	30770	29653	30822	5672	8651	41515	52625	36579	21852	1328	3414	3535	1704	2885	2524	2464	2256	3321	4673	1801	2963	2132
Bacteria_Calditrichota_Calditrichia_Calditrichales_Calditrichaceae_SM23-31	3747	6956	7466	10430	23298	30045	5167	7543	10163	12347	38796	33116	3143	6702	8330	7702	27329	36183	9995	18962	34893	41170	68456	87938	12821	14035	37137	34572	41802	100302	7321	9961	45302	58214	67192	51179	2901	11240	13434	10195	13342	10818	10139	12631	25851	14801	5637	11244	8542
Bacteria_Campylobacterota_Campylobacteria_Campylobacterales_Arcobacteraceae_Arcobacter	957	586	313	328	358	241	463	523	447	430	261	244	572	530	353	316	308	268	1369	543	897	1193	593	513	4795	1310	734	637	2386	1061	1660	217	507	599	311	292	579	245	570	3963	5386	819	3495	810	2458	10045	203	436	881
Bacteria_Campylobacterota_Campylobacteria_Campylobacterales_Arcobacteraceae_Halarcobacter	2365	1157	111	79	54	0	1504	678	123	84	28	0	1842	1048	145	89	36	0	913	404	895	1063	343	97	1369	360	991	333	1635	376	2013	234	422	87	0	0	322	164	152	249	322	99	298	116	159	251	115	159	112
Bacteria_Campylobacterota_Campylobacteria_Campylobacterales_Arcobacteraceae_Malaciobacter	217	186	30	39	57	36	153	178	71	49	27	75	190	175	42	85	49	0	518	187	440	541	150	118	647	140	301	139	475	143	1069	65	125	88	37	59	1992	969	516	500	413	98	319	155	179	489	670	1044	358
Bacteria_Campylobacterota_Campylobacteria_Campylobacterales_Arcobacteraceae_Poseidonibacter	151	52	0	0	0	0	0	0	0	0	0	0	112	90	0	0	0	0	0	0	0	0	0	0	0	0	0	0	0	0	56	0	0	0	0	0	41	0	53	96	145	39	131	58	66	112	19	31	34
Bacteria_Campylobacterota_Campylobacteria_Campylobacterales_Arcobacteraceae_Pseudarcobacter	508	441	150	153	244	106	501	328	166	196	195	190	512	482	133	212	186	95	1168	511	1725	2697	853	264	1505	421	1160	714	1656	490	2087	245	571	210	195	231	1558	1134	3581	40233	53495	2353	40644	8885	24333	58769	759	1720	6074
Bacteria_Campylobacterota_Campylobacteria_Campylobacterales_Arcobacteraceae_uncultured	19759	24354	2762	3028	2302	705	19400	19468	5977	4120	708	1193	16407	27363	3617	2216	1217	776	131378	45797	112317	156638	41183	16124	137354	25728	64070	26013	132111	19858	594291	23482	34692	9707	2480	7149	11192	7350	12970	31313	36444	6092	27853	9282	14277	23553	5219	8083	8139
Bacteria_Campylobacterota_Campylobacteria_Campylobacterales_Campylobacteraceae_Campylobacter	830	974	608	852	938	495	824	929	932	940	629	443	701	1129	742	963	987	537	1324	1872	2072	2569	787	556	1869	1483	2170	1778	4232	1396	2085	1124	1989	2184	632	280	1493	1208	1186	1269	1064	949	950	1280	965	745	1010	931	841
Bacteria_Campylobacterota_Campylobacteria_Campylobacterales_Helicobacteraceae_Helicobacter	736	928	516	755	724	1265	867	920	1006	617	712	1000	712	980	616	614	658	1261	2748	2221	2816	2858	1904	1126	1696	1460	2474	1762	5895	1921	10635	1205	1642	1596	1369	562	1294	724	650	328	422	359	360	178	219	237	649	738	458
Bacteria_Campylobacterota_Campylobacteria_Campylobacterales_Helicobacteraceae_Wolinella	0	0	0	0	0	0	0	0	0	0	0	0	0	0	0	0	0	0	0	0	0	0	0	0	0	0	0	0	22	0	0	0	0	0	0	0	0	0	0	0	0	0	0	0	0	0	0	0	0
Bacteria_Campylobacterota_Campylobacteria_Campylobacterales_Helicobacteraceae_uncultured	539	1067	345	375	314	142	730	930	854	439	131	133	493	865	292	321	125	99	585	406	695	1920	286	119	820	470	1471	1442	676	235	759	304	569	221	126	71	274	571	498	235	167	144	106	89	44	54	314	406	277
Bacteria_Campylobacterota_Campylobacteria_Campylobacterales_Hydrogenimonadaceae_Hydrogenimonas	150	330	140	185	193	65	216	335	236	177	101	67	111	294	242	223	110	45	100	74	67	91	29	18	123	71	74	50	91	27	167	36	44	47	37	24	364	223	148	107	153	166	154	93	114	49	240	145	133
Bacteria_Campylobacterota_Campylobacteria_Campylobacterales_Incertae Sedis_Thiofractor	0	0	0	0	0	0	0	0	0	0	0	0	0	0	0	0	0	0	26	19	24	0	51	51	27	0	16	0	32	0	0	0	0	0	0	0	0	0	0	18	34	21	11	0	0	0	0	0	0
Bacteria_Campylobacterota_Campylobacteria_Campylobacterales_Nitratiruptoraceae_Nitratiruptor	130	165	112	111	243	203	93	100	95	155	129	144	134	177	148	168	166	179	70	132	113	140	106	46	107	125	99	148	111	42	98	79	185	139	159	63	95	404	494	188	122	92	73	82	77	130	212	316	273
Bacteria_Campylobacterota_Campylobacteria_Campylobacterales_Sulfurimonadaceae_Sulfuricurvum	425	417	314	359	947	825	408	402	404	453	970	1157	324	376	323	397	752	715	2448	1050	3132	3095	1417	552	1193	769	1603	1195	2999	746	14132	743	1655	908	399	469	15467	7406	4655	3583	6811	5049	3696	3683	947	659	8347	7935	3615
Bacteria_Campylobacterota_Campylobacteria_Campylobacterales_Sulfurimonadaceae_Sulfurimonas	35348	29393	24879	41316	146839	12266	31327	41199	79010	96289	21212	16786	26437	23318	31572	42444	83522	4567	78156	96545	157045	256835	29469	19200	106298	51456	246468	86521	443085	56931	187809	57408	87102	18597	1205	2955	298990	188866	168367	153007	185802	127314	131945	48889	13850	8345	194773	149736	108785
Bacteria_Campylobacterota_Campylobacteria_Campylobacterales_Sulfurimonadaceae_Thiovulum	220	119	67	133	233	59	141	128	132	158	99	79	178	90	126	125	113	43	3150	1103	2020	2057	932	430	21200	3889	2852	1067	19253	6683	8075	530	218	159	27	131	1070	1171	260	229	215	224	161	121	114	148	740	357	221
Bacteria_Campylobacterota_Campylobacteria_Campylobacterales_Sulfurospirillaceae_Sulfurospirillum	1523	894	388	457	844	660	970	678	614	660	395	1496	1010	796	398	460	497	895	4678	1467	3518	4314	2274	1883	7978	1429	2027	951	16991	3295	15588	691	1322	589	654	884	6340	2503	12280	28842	7433	6423	10260	45438	3424	6127	2130	4402	6875
Bacteria_Campylobacterota_Campylobacteria_Campylobacterales_Sulfurovaceae_Nitratifractor	558	613	218	301	565	176	512	516	526	443	296	268	464	444	310	391	656	150	865	704	1027	1193	300	295	1202	636	1256	671	6951	928	1542	367	1423	1362	60	83	2328	921	850	458	416	735	368	321	274	223	738	1165	536
Bacteria_Campylobacterota_Campylobacteria_Campylobacterales_Sulfurovaceae_Sulfurovum	18506	17118	9610	10348	37131	19257	16265	14699	10684	11593	16507	37468	15423	16887	12559	8594	22575	8922	15372	15324	29948	44644	7029	11825	25976	9707	22410	9162	260114	33571	72216	20442	17030	5963	2451	1842	529895	35349	106293	58472	68229	82543	58639	65179	68916	25356	65013	70324	28828
Bacteria_Campylobacterota_Campylobacteria_Campylobacterales_Thioreductoraceae_Thioreductor	91	69	32	56	16	0	69	81	51	32	20	0	55	79	36	18	0	0	55	24	29	37	15	27	66	19	42	17	397	49	44	19	15	23	0	0	0	29	29	12	30	16	18	12	0	0	20	30	18
Bacteria_Campylobacterota_Campylobacteria_Nautiliales_Nautiliaceae_Caminibacter	337	520	289	429	57	0	299	330	281	304	41	0	255	403	350	813	79	0	186	125	70	52	198	126	131	141	39	54	157	151	310	96	19	21	89	19	74	119	47	26	76	44	41	0	18	32	93	41	46
Bacteria_Campylobacterota_Campylobacteria_Nautiliales_Nautiliaceae_Lebetimonas	173	229	44	51	40	0	149	133	46	42	18	0	110	284	44	27	33	18	71	24	21	21	0	0	89	0	0	0	0	0	130	0	0	0	0	0	0	0	0	0	0	0	0	0	0	0	0	0	0
Bacteria_Campylobacterota_Campylobacteria_Nautiliales_Nautiliaceae_Nautilia	0	0	0	0	0	0	0	0	0	0	0	0	0	0	0	0	0	0	0	0	0	0	0	0	0	0	0	0	0	0	0	0	0	0	0	0	0	0	0	0	0	0	0	0	0	0	0	0	0
Bacteria_Campylobacterota_Campylobacteria_Nautiliales_Nautiliaceae_uncultured	276	342	97	110	295	412	261	201	84	324	336	593	289	299	145	152	265	493	236	220	252	277	137	724	238	226	356	218	132	97	395	163	516	571	165	267	0	58	45	18	47	76	33	29	18	26	27	65	48
Bacteria_Campylobacterota_Desulfurellia_Desulfurellales_Desulfurellaceae_Desulfurella	59	92	105	124	346	160	85	68	149	210	278	104	72	95	95	146	200	219	57	53	84	66	189	829	53	46	73	86	134	1001	86	46	62	67	137	480	12	30	53	11	33	37	31	37	48	99	32	27	35
Bacteria_Campylobacterota_Desulfurellia_Desulfurellales_Hippeaceae_Hippea	125	188	189	209	39	0	123	196	184	148	56	0	68	169	201	181	144	0	0	0	0	0	0	0	43	0	31	23	0	0	21	22	29	0	15	28	23	93	87	28	38	29	29	29	38	38	58	58	34
Bacteria_Chloroflexi_Anaerolineae_Anaerolineales_Anaerolineaceae_ADurb.Bin120	1133	1209	1560	1283	2194	2582	1014	1252	896	1141	1490	3173	768	1010	1454	1230	1344	2514	819	1431	2167	2489	2439	1765	1417	1347	1841	2210	1809	1455	814	1300	1029	2430	2336	1341	1556	1789	3208	2415	3666	3902	4608	4149	5075	3302	1213	2656	2252
Bacteria_Chloroflexi_Anaerolineae_Anaerolineales_Anaerolineaceae_Anaerolinea	1031	837	724	715	944	808	807	722	575	637	584	763	889	836	639	958	876	741	853	1307	1432	1665	1264	1352	1355	1176	1151	1429	1582	1097	1149	1060	918	1630	1271	1183	7284	5003	8357	5382	6545	7812	9158	12523	16322	8853	3461	6500	5231
Bacteria_Chloroflexi_Anaerolineae_Anaerolineales_Anaerolineaceae_Anaerolineaceae UCG-001	1027	1074	853	637	1591	2138	841	892	506	503	965	2022	753	845	728	737	917	1817	437	1146	1560	1841	5750	5212	864	886	1407	1662	3472	4268	840	778	1292	2085	5324	4713	1130	2670	6084	7919	4360	6260	7576	15628	11414	3418	1550	4625	4592
Bacteria_Chloroflexi_Anaerolineae_Anaerolineales_Anaerolineaceae_Bellilinea	426	407	21	0	30	37	468	424	43	20	19	45	284	497	59	0	0	22	77	132	112	125	35	19	85	102	124	108	56	0	102	84	66	102	54	35	97	262	823	613	856	939	774	758	638	385	158	554	695
Bacteria_Chloroflexi_Anaerolineae_Anaerolineales_Anaerolineaceae_Flexilinea	470	565	634	577	877	916	408	481	474	541	468	698	418	360	586	466	568	754	330	352	651	743	704	461	361	340	609	672	590	231	336	418	339	566	652	407	717	1635	2389	1835	2148	2470	2304	2406	2488	1976	947	1987	1880
Bacteria_Chloroflexi_Anaerolineae_Anaerolineales_Anaerolineaceae_GWD2-49-16	0	0	0	0	0	0	0	0	0	0	0	0	0	0	0	0	0	0	69	156	57	69	26	0	148	111	95	65	55	18	88	118	94	62	26	0	7392	17085	32921	21852	28702	34014	32250	29902	35896	38516	10101	23225	24707
Bacteria_Chloroflexi_Anaerolineae_Anaerolineales_Anaerolineaceae_Leptolinea	1813	1560	1198	1022	1474	1669	1271	1419	1026	983	1017	1983	1482	1366	1140	1250	1265	1536	679	1010	1387	1522	1553	1004	923	778	1184	1255	1372	850	773	744	1117	1567	1136	1115	6784	15545	30058	18427	21622	27016	27708	30262	44583	40676	8916	24155	17468
Bacteria_Chloroflexi_Anaerolineae_Anaerolineales_Anaerolineaceae_Levilinea	468	613	913	813	2820	2797	383	672	739	966	1957	3240	350	460	946	891	1987	2460	996	1387	2998	3596	2084	1144	1296	1528	2985	3779	1904	1041	872	1335	2225	2647	1395	1082	3574	2284	4090	2694	3755	4788	5632	7383	8052	5777	1509	3069	2553
Bacteria_Chloroflexi_Anaerolineae_Anaerolineales_Anaerolineaceae_Longilinea	1299	1303	957	923	1522	1506	1032	985	839	881	799	2116	1140	1126	944	1278	860	1545	1255	1674	2637	2770	4165	3197	1400	1438	1809	2139	2920	3786	1410	1237	2035	2740	3449	6153	2460	3160	5596	5035	6003	8782	10526	17519	21013	17523	1898	4507	3759
Bacteria_Chloroflexi_Anaerolineae_Anaerolineales_Anaerolineaceae_Ornatilinea	312	319	300	272	533	648	260	314	237	296	526	1149	278	304	254	317	391	624	734	2510	2171	1734	1074	522	1160	1490	1379	1383	847	639	1321	1436	1141	1693	552	388	4028	3043	7533	10517	8680	13167	18770	142534	106598	14932	2449	6612	6042
Bacteria_Chloroflexi_Anaerolineae_Anaerolineales_Anaerolineaceae_Pelolinea	1091	1372	1181	1233	3143	3962	1117	1127	1113	1191	1907	4962	942	1149	1217	1120	2670	5085	1284	2527	4045	5997	13627	19781	1819	1960	3126	3896	8092	10921	1344	2034	4108	6721	18050	19744	1594	4957	9761	7616	11278	15821	19603	27552	43672	31532	2595	7134	6897
Bacteria_Chloroflexi_Anaerolineae_Anaerolineales_Anaerolineaceae_RBG-16-58-14	1642	1530	438	355	365	308	1365	1072	398	349	214	368	1429	1238	481	345	314	322	278	367	432	463	256	455	576	428	482	384	389	500	337	246	186	563	174	181	418	1657	4192	2609	5600	6352	7247	4173	3320	2451	763	3212	2528
Bacteria_Chloroflexi_Anaerolineae_Anaerolineales_Anaerolineaceae_Thermanaerothrix	62	48	42	30	0	0	51	22	30	0	0	21	49	66	27	0	0	20	0	29	21	20	29	0	27	0	0	0	39	37	0	0	25	28	55	39	28	76	80	27	41	67	48	37	64	66	32	73	35
Bacteria_Chloroflexi_Anaerolineae_Anaerolineales_Anaerolineaceae_Thermomarinilinea	7844	13924	3419	4682	1926	604	10468	11234	4855	3033	526	876	7000	13600	5561	4118	3007	906	40234	22688	14427	12243	5625	2790	38862	18869	11495	5721	40411	10593	107524	13729	3618	2442	2809	1481	30903	8326	18649	4822	4216	7962	4438	3931	2706	1898	7444	10921	5480
Bacteria_Chloroflexi_Anaerolineae_Anaerolineales_Anaerolineaceae_UTCFX1	661	927	283	298	328	216	721	670	277	271	230	288	648	1012	413	404	370	229	1140	721	660	567	217	204	1009	610	578	521	1032	275	1830	416	430	480	175	110	2101	2725	2614	1326	1413	1494	1205	895	957	1427	1755	2818	1506
Bacteria_Chloroflexi_Anaerolineae_Anaerolineales_Anaerolineaceae_uncultured	344604	428425	517449	486627	997410	1082926	338617	405132	380176	456388	728842	1280943	287803	369512	470414	471255	848629	1002811	414185	610816	1283011	1554493	2236993	1487675	473161	582912	1047762	1363454	1437099	1157173	352655	500694	691489	1399307	1670089	1543666	161058	358061	577141	338618	500963	550993	609184	472433	582127	477588	194226	470289	356158
Bacteria_Chloroflexi_Anaerolineae_Ardenticatenales_Ardenticatenaceae_Ardenticatena	34	51	40	23	0	0	27	28	31	35	20	0	28	40	25	34	19	18	0	0	0	33	22	0	0	0	29	0	22	20	0	0	0	30	0	25	44	40	57	16	24	29	19	20	17	20	27	38	18
Bacteria_Chloroflexi_Anaerolineae_Ardenticatenales_Ardenticatenaceae_uncultured	1451	1473	530	554	1152	582	1087	973	679	726	880	669	1421	1028	634	770	817	480	1359	1208	1566	1498	1277	742	1555	1192	1119	1275	1617	941	2406	1086	893	1094	953	992	1428	2450	903	450	509	580	646	453	597	533	2477	1074	844
Bacteria_Chloroflexi_Anaerolineae_Caldilineales_Caldilineaceae_Caldilinea	60	45	48	30	31	39	0	56	40	34	0	40	34	0	30	40	46	0	31	0	0	35	49	0	0	0	0	31	52	0	0	56	0	27	68	0	577	2071	2129	1428	1924	2427	2102	282	178	95	1046	2772	1368
Bacteria_Chloroflexi_Anaerolineae_Caldilineales_Caldilineaceae_Litorilinea	732	686	513	361	705	697	449	589	341	362	695	511	611	428	590	657	582	437	687	653	886	1181	436	187	924	835	599	921	866	306	710	1077	762	686	270	143	194	783	812	403	829	1078	1122	279	506	684	381	922	558
Bacteria_Chloroflexi_Anaerolineae_Caldilineales_Caldilineaceae_uncultured	212050	196948	274618	168458	150831	131524	148117	221857	121105	130865	139201	111566	200186	153270	248193	203259	140967	83503	98020	86051	78177	75731	21818	11259	125801	121182	49210	72992	53409	10447	87096	156470	50045	37064	14012	10714	39371	171890	194116	97033	151480	197142	205896	50061	55092	35115	90039	200480	115323
Bacteria_Chloroflexi_Anaerolineae_SBR1031_A4b_OLB13	144230	157849	113338	98256	288245	338033	131550	141245	91766	116819	244800	449508	123268	128002	111032	96474	258614	305300	70682	106519	272786	397213	688604	680048	100737	117516	255929	338041	588138	698878	75111	95563	206723	351488	571468	559431	30091	28399	30152	24932	38099	45266	45429	70803	97911	68977	21307	39661	21436
Bacteria_Chloroflexi_Anaerolineae_SBR1031_A4b_OLB15	26	0	0	0	0	0	0	0	0	0	0	0	19	0	0	0	0	0	0	0	0	30	16	0	0	0	0	20	0	0	0	0	0	0	0	38	29377	55296	86631	69320	97158	131601	155452	116743	171113	129078	34975	72737	57652
Bacteria_Chloroflexi_Anaerolineae_Thermoflexales_Thermoflexaceae_Thermoflexus	1246	1748	2084	2062	7058	12186	1338	1798	1917	2935	6342	18715	956	1386	2342	2414	5265	10836	1208	2704	8112	12835	31446	65529	2015	3170	6099	9399	29784	615083	917	2241	4621	8259	20525	31403	377	831	898	763	1301	1421	1954	1257	2300	1902	531	1089	661
Bacteria_Chloroflexi_Chloroflexia_Chloroflexales_Chloroflexaceae_Candidatus Chloroploca	46	69	0	42	28	0	39	39	0	42	0	0	33	74	36	33	0	0	0	0	0	0	0	0	0	0	24	36	0	0	28	0	0	50	0	0	0	39	31	27	31	38	31	14	0	27	18	38	19
Bacteria_Chloroflexi_Chloroflexia_Chloroflexales_Chloroflexaceae_Candidatus Chlorothrix	408	490	208	248	278	273	399	310	225	210	250	280	360	448	214	311	307	264	152	171	188	197	415	430	200	129	144	188	280	366	135	120	188	216	290	243	295	261	275	135	197	222	150	131	149	144	204	235	188
Bacteria_Chloroflexi_Chloroflexia_Chloroflexales_Chloroflexaceae_Chloroflexus	72	90	83	166	52	54	78	177	99	61	44	63	58	71	50	73	60	68	68	87	64	64	95	126	75	56	52	66	89	123	52	39	61	80	99	53	78	113	116	132	138	133	100	187	244	243	101	87	101
Bacteria_Chloroflexi_Chloroflexia_Chloroflexales_Chloroflexaceae_Chloronema	0	19	0	0	0	0	38	18	0	0	0	0	24	24	0	0	0	0	0	0	0	0	0	0	0	0	0	0	0	0	0	0	0	0	0	26	0	37	23	0	25	33	38	24	20	18	13	45	25
Bacteria_Chloroflexi_Chloroflexia_Chloroflexales_Chloroflexaceae_FFCH7168	46	44	55	55	51	20	41	44	64	79	45	21	22	58	52	81	49	18	53	96	36	40	43	38	52	47	26	33	31	50	56	33	19	26	27	0	75	82	74	76	90	108	117	72	123	70	76	76	85
Bacteria_Chloroflexi_Chloroflexia_Chloroflexales_Chloroflexaceae_Oscillochloris	0	0	0	0	0	0	0	0	0	0	0	0	0	0	0	0	0	0	0	0	0	0	0	0	17	0	16	0	0	15	0	0	0	0	0	0	187	42	12	13	17	0	0	23	45	60	65	12	12
Bacteria_Chloroflexi_Chloroflexia_Chloroflexales_Chloroflexaceae_uncultured	0	0	0	0	0	0	0	0	29	0	0	0	0	0	0	0	44	0	0	0	0	0	0	0	0	0	0	0	37	0	0	0	0	0	0	0	0	0	0	0	0	0	0	0	0	0	0	0	0
Bacteria_Chloroflexi_Chloroflexia_Chloroflexales_Herpetosiphonaceae_Herpetosiphon	105	198	249	241	195	116	156	213	171	181	197	102	97	165	198	212	189	116	64	121	85	97	69	62	98	73	95	108	65	61	75	73	82	77	51	53	40	75	65	51	73	77	55	38	84	59	77	57	75
Bacteria_Chloroflexi_Chloroflexia_Chloroflexales_Roseiflexaceae_Roseiflexus	133	225	187	200	235	142	151	187	193	185	141	110	117	194	168	144	192	154	64	113	123	103	118	94	115	104	116	114	84	131	45	100	97	138	104	61	26	58	51	34	40	40	37	17	28	53	44	59	34
Bacteria_Chloroflexi_Chloroflexia_Chloroflexales_Roseiflexaceae_uncultured	424	467	335	385	575	265	384	386	437	375	347	285	361	409	366	385	325	394	170	209	190	211	311	258	240	234	178	204	223	286	141	208	162	252	353	295	471	624	533	386	462	421	400	381	786	696	378	544	353
Bacteria_Chloroflexi_Chloroflexia_Kallotenuales_Kallotenuaceae_Kallotenue	0	0	0	0	0	0	0	0	0	0	0	0	0	0	0	0	0	0	0	0	0	0	0	0	0	0	0	0	0	0	0	0	0	0	0	0	0	15	22	0	0	0	12	0	0	16	0	26	0
Bacteria_Chloroflexi_Chloroflexia_Thermobaculales_Thermobaculaceae_Thermobaculum	78	96	88	108	74	64	87	96	76	86	59	69	58	97	87	73	82	54	78	83	159	148	131	142	62	76	108	133	121	143	73	60	143	131	61	72	277	128	149	87	90	116	122	80	105	112	89	128	88
Bacteria_Chloroflexi_Chloroflexia_Thermomicrobiales_Thermomicrobiaceae_Nitrolancea	65	85	85	83	52	79	66	48	75	76	46	47	55	72	70	64	44	39	158	59	58	52	130	82	121	76	48	34	66	34	320	65	51	51	85	114	92	228	151	101	139	137	97	120	178	243	154	104	161
Bacteria_Chloroflexi_Chloroflexia_Thermomicrobiales_Thermomicrobiaceae_Sphaerobacter	0	52	59	62	61	34	58	55	38	62	38	34	41	55	63	88	65	0	0	34	35	30	0	0	0	0	0	0	0	0	0	32	0	0	0	0	0	0	0	0	0	0	0	0	0	38	0	94	0
Bacteria_Chloroflexi_Chloroflexia_Thermomicrobiales_Thermomicrobiaceae_Thermomicrobium	55	35	19	0	0	0	36	30	18	0	0	0	46	21	0	16	20	0	0	0	0	0	0	0	0	0	0	0	0	0	0	0	0	0	0	0	0	0	0	0	0	0	0	0	0	0	0	0	0
Bacteria_Chloroflexi_Chloroflexia_Thermomicrobiales_Thermomicrobiaceae_Thermorudis	0	0	0	0	0	0	0	0	0	0	0	0	0	0	0	0	0	0	0	0	0	0	0	0	0	0	0	0	0	0	0	0	0	0	0	0	0	0	0	0	0	11	0	0	24	42	0	11	0
Bacteria_Chloroflexi_Dehalococcoidia_Dehalococcoidales_Dehalococcoidaceae_Dehalococcoides	349	345	231	490	1977	1785	260	259	383	841	1904	2116	192	353	430	899	1883	1720	154	509	986	1241	3505	4273	364	484	1283	1295	1653	4886	125	259	723	1467	4215	3612	197	1215	1547	1566	3410	2609	2883	1910	3256	2513	549	1411	1980
Bacteria_Chloroflexi_Dehalococcoidia_Dehalococcoidales_Dehalococcoidaceae_Dehalogenimonas	31	64	147	177	1290	1145	53	72	195	445	769	1846	0	64	174	294	952	1335	629	1524	3142	5032	19617	19124	659	948	3882	3594	7262	17091	560	867	3621	7132	22540	19106	2623	10447	17951	8384	16298	20981	19119	23731	23971	27440	4763	10005	12768
Bacteria_Chloroflexi_Dehalococcoidia_Dehalococcoidales_Dehalococcoidales Incertae Sedis_Dehalobium	1948	5110	8977	15962	83394	64453	3181	5912	16642	34004	60585	81143	1719	5033	12942	21405	76803	77709	4106	16126	43361	76626	164460	124541	6693	13683	47601	45705	66356	118383	2521	7618	53780	102168	196620	151804	290	1047	3418	3055	16989	15137	19352	16185	27025	42994	572	1964	2797
Bacteria_Chloroflexi_Dehalococcoidia_GIF9_AB-539-J10_Dsc1	0	300	532	834	3927	1224	247	444	871	1393	1000	612	0	265	755	653	3086	1145	311	791	1112	1699	7442	7688	414	513	663	706	1116	3938	338	602	1260	4733	19894	9955	0	196	504	258	526	1020	1673	3110	7268	7963	155	377	317
Bacteria_Chloroflexi_Dehalococcoidia_GIF9_AB-539-J10_SCGC-AB-539-J10	911	1596	2280	3823	26174	44062	972	1485	3736	7466	20778	101046	729	1232	2938	4682	27729	49899	2306	8755	47235	114306	1092560	2039989	3712	7223	89478	80748	621047	2252945	1951	4716	41678	153104	1211658	1500256	2207	8379	23231	21688	47811	40830	42699	68458	83641	42965	3885	14283	14442
Bacteria_Chloroflexi_Ktedonobacteria_Ktedonobacterales_Ktedonobacteraceae_1921-2	0	26	0	0	0	0	0	0	0	0	16	0	0	0	0	0	0	0	16	23	0	0	0	0	0	16	0	0	0	41	19	0	0	0	43	0	0	15	15	10	23	19	24	17	17	0	0	15	0
Bacteria_Chloroflexi_Ktedonobacteria_Ktedonobacterales_Ktedonobacteraceae_1921-3	120	110	69	77	198	119	81	84	81	75	123	133	93	100	60	91	170	133	179	249	427	489	427	322	180	226	383	359	287	326	122	145	462	561	556	169	371	770	967	484	743	457	293	183	214	185	779	774	900
Bacteria_Chloroflexi_Ktedonobacteria_Ktedonobacterales_Ktedonobacteraceae_1959-1	145	135	105	113	94	47	159	144	112	55	49	60	150	132	94	54	82	58	105	123	93	71	231	150	117	132	118	106	149	171	120	155	93	76	166	97	0	21	15	0	17	25	27	20	35	31	21	30	23
Bacteria_Chloroflexi_Ktedonobacteria_Ktedonobacterales_Ktedonobacteraceae_BacC-u-018	0	0	0	0	0	0	0	0	0	0	18	0	21	0	0	0	0	0	0	0	0	0	31	28	0	0	0	0	0	88	0	0	0	0	45	29	0	16	14	0	0	0	0	0	12	0	0	0	0
Bacteria_Chloroflexi_Ktedonobacteria_Ktedonobacterales_Ktedonobacteraceae_FCPS473	231	290	77	117	101	90	181	184	97	86	76	84	197	196	74	118	103	86	118	91	97	153	161	202	106	96	83	108	96	117	108	68	147	111	157	110	134	151	84	55	176	131	146	328	315	144	180	103	62
Bacteria_Chloroflexi_Ktedonobacteria_Ktedonobacterales_Ktedonobacteraceae_G12-WMSP1	25	26	22	27	0	22	19	21	28	0	20	0	25	26	15	28	18	28	141	148	36	36	19	0	47	40	17	15	22	0	65	62	17	19	23	0	14	21	36	13	24	27	26	19	28	34	17	32	19
Bacteria_Chloroflexi_Ktedonobacteria_Ktedonobacterales_Ktedonobacteraceae_HSB OF53-F07	78	92	60	66	62	68	108	87	57	73	69	50	60	82	75	98	53	48	43	54	103	80	119	315	99	81	78	81	62	404	64	40	50	69	154	256	36	82	55	74	68	84	92	62	70	53	58	92	71
Bacteria_Chloroflexi_Ktedonobacteria_Ktedonobacterales_Ktedonobacteraceae_JG30a-KF-32	39	58	42	38	39	48	38	32	29	28	53	47	30	44	36	51	52	33	27	31	21	28	50	70	18	36	33	26	48	143	23	47	17	19	54	42	30	43	35	22	74	52	48	64	66	34	56	41	41
Bacteria_Chloroflexi_Ktedonobacteria_Ktedonobacterales_Ktedonobacteraceae_Ktedonobacter	207	183	213	136	279	134	124	134	126	196	269	139	193	162	196	174	246	96	70	100	144	142	303	276	85	55	100	136	151	62	68	80	295	202	163	393	51	171	60	22	56	64	57	15	29	27	136	77	42
Bacteria_Chloroflexi_Ktedonobacteria_Ktedonobacterales_Ktedonobacteraceae_Thermogemmatispora	0	0	23	0	0	0	0	0	0	0	0	0	0	0	0	24	0	0	0	24	27	28	20	0	18	0	32	16	30	15	0	26	25	30	37	0	46	31	29	16	0	15	20	11	10	0	40	23	10
Bacteria_Chloroflexi_Ktedonobacteria_Ktedonobacterales_Ktedonobacteraceae_Thermosporothrix	58	109	51	105	160	113	75	88	91	123	120	109	45	66	88	90	54	170	44	46	57	85	487	308	55	32	83	106	77	112	82	29	75	94	385	189	40	70	69	40	36	64	46	54	76	31	87	79	37
Bacteria_Chloroflexi_Ktedonobacteria_Ktedonobacterales_Ktedonobacteraceae_uncultured	1768	1986	1912	1696	1762	2534	1784	1869	1404	1377	1722	1880	1382	1646	1694	1816	1085	1833	845	1018	879	774	1288	908	889	883	792	829	933	619	924	957	800	710	1039	1273	618	1342	1200	565	861	984	859	551	586	506	1144	1216	1006
Bacteria_Chrysiogenetota_Chrysiogenetes_Chrysiogenales_Chrysiogenaceae_Chrysiogenes	0	0	0	0	0	15	0	0	0	0	0	0	0	0	0	0	0	15	0	29	0	0	26	0	17	0	28	21	17	18	0	0	15	36	0	0	12	19	16	0	18	16	14	0	12	14	0	12	14
Bacteria_Chrysiogenetota_Chrysiogenetes_Chrysiogenales_Chrysiogenaceae_Desulfurispira	0	17	0	0	0	0	0	17	0	0	0	0	0	26	0	0	0	0	0	0	0	0	0	0	0	0	0	0	0	17	0	0	0	0	0	57	0	16	32	27	26	42	45	17	19	0	10	31	33
Bacteria_Chrysiogenetota_Chrysiogenetes_Chrysiogenales_Chrysiogenaceae_Desulfurispirillum	22	35	39	59	48	32	26	49	116	113	22	45	0	39	53	63	56	34	42	32	46	63	48	0	32	34	52	46	34	0	32	35	66	119	50	0	0	42	118	65	109	57	21	44	38	22	22	51	76
Bacteria_Cloacimonadota_Cloacimonadia_Cloacimonadales_Cloacimonadaceae_C-2	0	0	0	0	0	0	0	0	0	0	0	0	0	0	0	0	0	0	0	0	0	0	0	0	0	0	0	0	0	0	0	0	0	0	0	0	0	145	0	0	0	0	63	225	109	0	60	65	0
Bacteria_Cloacimonadota_Cloacimonadia_Cloacimonadales_Cloacimonadaceae_Candidatus Cloacimonas	470	462	205	322	190	264	410	260	388	293	352	354	410	317	257	487	167	199	1339	1012	988	908	2076	1776	1094	921	1007	890	1021	1078	1636	596	793	591	2852	1796	1189	905	615	546	755	1132	1025	1185	860	664	741	610	532
Bacteria_Cloacimonadota_Cloacimonadia_Cloacimonadales_Cloacimonadaceae_LNR A2-18	0	23	0	26	0	23	0	18	0	143	25	0	0	23	0	23	0	0	56	52	74	100	395	136	0	29	61	51	120	85	81	42	47	78	375	327	1738	1070	492	318	221	302	377	513	298	0	1078	312	423
Bacteria_Cloacimonadota_Cloacimonadia_Cloacimonadales_Cloacimonadaceae_W5	54	61	38	46	49	70	64	46	36	0	46	49	0	60	31	61	33	133	276	153	285	175	639	642	295	189	203	140	411	251	866	114	287	117	480	1375	467	340	262	149	349	240	350	391	372	263	386	226	238
Bacteria_Coprothermobacterota_Coprothermobacteria_Coprothermobacterales_Coprothermobacteraceae_Coprothermobacter	400	821	468	528	396	166	527	645	552	492	415	177	439	970	513	1334	483	151	239	334	522	406	486	239	344	256	313	311	259	174	271	249	508	297	481	366	159	192	132	90	101	109	117	84	146	155	145	154	112
Bacteria_Cyanobacteria_Cyanobacteriia_Cyanobacteriales_Chamaesiphonaceae_Chamaesiphon PCC-6605	0	0	33	32	0	0	0	89	0	0	0	0	0	0	32	0	0	0	2113	1592	755	140	0	0	671	759	83	61	1362	73	680	1235	448	0	0	0	22	38	0	0	0	0	0	0	0	0	20	0	28
Bacteria_Cyanobacteria_Cyanobacteriia_Cyanobacteriales_Chroococcidiopsaceae_Aliterella	242	238	138	88	115	120	171	178	136	135	66	68	207	267	147	72	80	83	575	387	164	227	53	90	539	298	128	124	148	102	593	315	153	92	119	149	572	606	569	655	608	487	947	563	565	107	446	448	425
Bacteria_Cyanobacteria_Cyanobacteriia_Cyanobacteriales_Chroococcidiopsaceae_Chlorogloea SAG 10.99	35	0	0	0	0	0	29	36	0	0	0	0	0	34	0	0	0	0	83	91	40	0	0	0	131	82	37	0	0	0	108	70	0	0	0	0	21	18	20	0	19	31	45	27	35	17	0	19	20
Bacteria_Cyanobacteria_Cyanobacteriia_Cyanobacteriales_Chroococcidiopsaceae_Chroococcidiopsis CC1	0	0	0	0	0	0	0	0	0	0	0	0	0	0	0	0	0	0	0	0	0	0	0	0	0	0	0	0	0	0	0	0	0	0	0	0	79	80	51	47	71	35	93	61	77	0	44	41	51
Bacteria_Cyanobacteria_Cyanobacteriia_Cyanobacteriales_Chroococcidiopsaceae_Chroococcidiopsis PCC 7203	38	56	24	0	33	309	28	21	0	0	96	739	48	30	17	0	40	480	97	208	535	551	712	114	115	150	294	364	256	136	81	116	143	316	506	61	72	66	86	53	66	71	136	94	75	18	53	47	62
Bacteria_Cyanobacteria_Cyanobacteriia_Cyanobacteriales_Chroococcidiopsaceae_Chroococcidiopsis SAG 2023	40	29	33	28	0	0	31	45	35	0	0	0	39	36	30	54	0	0	48	48	0	29	0	0	48	54	0	0	0	28	40	30	0	0	0	0	995	165	84	118	90	88	261	67	101	22	99	60	77
Bacteria_Cyanobacteria_Cyanobacteriia_Cyanobacteriales_Chroococcidiopsaceae_Crinalium SAG 22.89	0	0	0	0	0	0	0	0	0	0	0	0	0	0	0	0	0	0	0	0	0	0	0	0	0	0	0	0	0	0	0	0	0	0	0	0	25	35	37	0	23	45	40	56	115	63	29	52	24
Bacteria_Cyanobacteria_Cyanobacteriia_Cyanobacteriales_Chroococcidiopsaceae_Dapisostemonum CCIBt 3536	28	0	0	0	0	0	0	26	72	0	0	0	57	70	0	0	0	0	502	87	73	41	0	0	244	165	118	54	90	0	789	91	0	0	0	0	31	34	0	0	13	0	0	0	16	0	24	0	0
Bacteria_Cyanobacteria_Cyanobacteriia_Cyanobacteriales_Chroococcidiopsaceae_Gloeocapsa PCC-7428	255	355	338	377	0	0	346	383	225	191	0	0	387	522	233	318	0	0	0	0	0	0	0	0	0	0	0	0	0	0	25	0	0	0	0	45	43	65	50	39	37	46	108	48	58	21	47	127	45
Bacteria_Cyanobacteria_Cyanobacteriia_Cyanobacteriales_Chroococcidiopsaceae_Myxosarcina SAG 30.84	26	39	0	41	0	0	0	30	22	0	0	0	41	26	27	27	24	573	263	159	104	61	0	0	206	158	72	65	69	0	260	202	80	0	0	0	858	106	83	44	43	27	35	32	58	20	171	108	45
Bacteria_Cyanobacteria_Cyanobacteriia_Cyanobacteriales_Chroococcidiopsaceae_uncultured	854	875	765	664	418	119	509	684	580	665	206	78	618	641	940	817	422	106	1256	880	708	606	155	190	1077	653	444	471	466	150	1207	629	537	176	106	171	1982	2327	1542	1577	1297	1119	2375	1439	1587	323	1653	1575	1163
Bacteria_Cyanobacteria_Cyanobacteriia_Cyanobacteriales_Coleofasciculaceae_Caldora VP642b	109	60	0	0	0	0	76	42	18	0	0	0	152	63	24	0	0	0	512	719	382	226	49	0	540	596	176	410	145	85	428	606	281	46	0	0	37	40	126	92	51	18	0	13	0	0	27	180	102
Bacteria_Cyanobacteria_Cyanobacteriia_Cyanobacteriales_Coleofasciculaceae_Coleofasciculus PCC-7420	2037	1981	1390	1522	1075	842	1532	1689	1468	1233	772	834	1752	1865	1450	1570	1019	1391	4391	3573	1809	1368	868	624	3700	2718	1389	1352	2007	676	5513	2803	1116	721	894	603	13266	10226	8636	10155	8779	7488	15168	9915	10095	1588	7833	7668	7632
Bacteria_Cyanobacteria_Cyanobacteriia_Cyanobacteriales_Coleofasciculaceae_Microcoleus CENA344	22	0	0	0	0	0	0	0	0	0	0	0	0	0	0	0	0	0	71	110	32	0	0	0	121	86	26	0	0	0	56	109	0	0	0	0	0	0	0	0	0	0	0	0	0	0	0	18	0
Bacteria_Cyanobacteria_Cyanobacteriia_Cyanobacteriales_Coleofasciculaceae_Microcoleus Es-Yyy1400	0	0	0	0	0	0	0	0	0	0	0	48	0	0	0	0	0	0	0	0	0	0	67	0	0	0	0	0	0	0	0	0	0	0	0	0	25	0	0	0	0	0	50	0	0	0	0	0	0
Bacteria_Cyanobacteria_Cyanobacteriia_Cyanobacteriales_Coleofasciculaceae_Microcoleus SAG 1449-1a	192	95	0	0	0	0	93	75	0	0	0	0	200	80	0	29	0	0	71	89	72	56	48	0	174	101	30	40	46	0	157	26	0	0	0	0	57	69	78	52	25	32	43	33	43	0	45	73	47
Bacteria_Cyanobacteria_Cyanobacteriia_Cyanobacteriales_Coleofasciculaceae_Moorea	0	0	0	0	0	0	0	0	0	0	0	0	0	17	0	0	0	0	45	29	0	0	0	0	32	20	0	0	0	0	58	21	0	0	0	0	99	59	66	53	61	73	133	71	61	46	73	73	41
Bacteria_Cyanobacteria_Cyanobacteriia_Cyanobacteriales_Coleofasciculaceae_Potamolinea 1PC	89	50	229	68	0	0	109	79	77	0	0	0	191	293	119	0	0	0	203	744	63	253	0	0	113	150	0	0	40	0	453	72	0	0	0	0	75	33	0	0	26	0	25	0	0	0	31	30	27
Bacteria_Cyanobacteria_Cyanobacteriia_Cyanobacteriales_Coleofasciculaceae_Symploca PCC-8002	213	226	19	22	0	0	189	107	53	0	0	0	139	123	35	41	0	0	111	58	22	21	0	0	104	33	26	0	63	0	70	48	0	0	0	0	67	117	49	35	30	40	43	16	29	0	93	41	33
Bacteria_Cyanobacteria_Cyanobacteriia_Cyanobacteriales_Coleofasciculaceae_Symplocastrum CPER-KK1	82	0	0	0	0	0	30	0	0	0	0	0	41	91	0	0	0	0	0	0	0	0	0	0	82	0	0	0	37	0	57	0	0	0	0	0	0	0	0	0	0	0	0	0	0	0	0	0	0
Bacteria_Cyanobacteria_Cyanobacteriia_Cyanobacteriales_Coleofasciculaceae_Wilmottia Ant-Ph58	95	86	55	39	0	35	82	62	40	37	36	33	53	257	29	50	0	0	217	139	81	85	54	0	262	107	166	123	275	0	1370	97	40	29	0	0	746	1145	555	506	436	385	715	425	401	123	671	631	444
Bacteria_Cyanobacteria_Cyanobacteriia_Cyanobacteriales_Coleofasciculaceae_uncultured	3647	1995	0	25	0	0	4514	232	22	0	0	0	901	138	34	0	0	0	538	124	36	30	0	0	679	63	30	41	41	0	1665	838	0	0	0	0	53	83	87	105	85	49	128	48	63	0	75	85	66
Bacteria_Cyanobacteria_Cyanobacteriia_Cyanobacteriales_Cyanobacteriaceae_Annamia HOs24	329	201	166	203	201	61	271	171	201	208	172	78	318	156	153	152	183	76	786	381	236	191	223	378	1088	350	292	187	695	187	1483	395	179	35	202	179	109	135	74	69	71	85	90	70	59	15	66	55	75
Bacteria_Cyanobacteria_Cyanobacteriia_Cyanobacteriales_Cyanobacteriaceae_Chroococcus HUW 799	41	36	0	0	0	0	0	89	0	0	0	0	0	32	40	0	0	0	176	128	187	0	0	0	86	56	31	0	23	0	136	248	0	0	0	0	85	77	73	67	59	79	138	108	89	20	90	70	68
Bacteria_Cyanobacteria_Cyanobacteriia_Cyanobacteriales_Cyanobacteriaceae_Cyanobacterium PCC-10605	0	0	0	0	0	0	0	0	0	0	0	0	0	0	0	0	0	0	0	21	0	0	0	0	31	22	23	0	0	0	0	32	0	0	0	0	22	20	15	14	0	15	0	13	15	0	0	15	0
Bacteria_Cyanobacteria_Cyanobacteriia_Cyanobacteriales_Cyanobacteriaceae_Cyanobacterium PCC-7202	470	196	37	37	0	0	231	258	21	0	0	0	270	292	28	50	0	0	622	294	221	154	141	0	991	422	318	240	525	0	1729	355	57	0	0	0	80	109	64	51	77	69	100	87	72	43	59	107	56
Bacteria_Cyanobacteria_Cyanobacteriia_Cyanobacteriales_Cyanobacteriaceae_Geitlerinema LD9	153	201	102	122	0	0	157	178	60	40	0	0	161	147	150	93	0	0	1331	725	374	478	69	0	901	828	261	166	176	64	1904	716	183	0	0	0	128	225	307	168	390	254	202	154	1043	51	127	308	110
Bacteria_Cyanobacteria_Cyanobacteriia_Cyanobacteriales_Cyanobacteriaceae_Geminobacterium	866	573	447	343	266	54	544	597	233	276	81	0	593	576	379	361	160	40	3007	3824	2709	2468	395	46	4857	4211	2746	3201	2037	132	4320	4199	2810	482	0	0	211	234	195	382	159	175	216	124	102	31	177	248	136
Bacteria_Cyanobacteria_Cyanobacteriia_Cyanobacteriales_Cyanobacteriaceae_Geminocystis PCC-6308	801	412	380	388	119	0	401	335	258	225	29	0	502	449	368	247	57	0	2498	3595	1186	1453	270	31	5872	3046	1316	937	967	120	3274	3133	1015	140	0	128	440	1170	1640	3883	1259	1272	1145	382	170	57	610	1915	873
Bacteria_Cyanobacteria_Cyanobacteriia_Cyanobacteriales_Cyanobacteriaceae_Merismopedia AICB1015	656	205	114	130	0	0	267	267	92	114	0	25	299	172	145	74	0	0	742	689	489	298	97	0	1066	677	349	169	299	35	1429	741	265	29	0	0	132	273	216	70	88	39	105	24	17	0	164	413	61
Bacteria_Cyanobacteria_Cyanobacteriia_Cyanobacteriales_Cyanobacteriaceae_Symphothece PCC-7002	2821	1521	37	41	0	0	2433	834	147	52	0	0	2177	1263	104	33	0	0	3802	886	1132	985	222	0	6151	1131	379	150	375	228	9233	500	96	0	0	0	4302	503	314	134	193	102	280	73	108	37	1083	350	211
Bacteria_Cyanobacteria_Cyanobacteriia_Cyanobacteriales_Cyanobacteriaceae_Synechocystis SAG 90.79	329	79	35	0	0	0	119	95	0	0	0	0	73	0	0	0	31	0	134	207	181	187	0	0	235	234	236	216	108	0	417	237	78	0	0	0	57	43	28	18	32	37	34	0	0	0	36	55	38
Bacteria_Cyanobacteria_Cyanobacteriia_Cyanobacteriales_Cyanobacteriaceae_uncultured	313	357	260	182	326	21	238	372	199	158	39	0	213	335	270	157	44	41	493	359	361	280	90	54	488	364	178	110	236	52	1013	299	109	70	92	78	354	122	111	87	85	97	97	47	40	22	145	94	64
Bacteria_Cyanobacteria_Cyanobacteriia_Cyanobacteriales_Cyanobacteriales Incertae Sedis_Microseira Carmichael-Alabama	0	32	32	24	30	0	19	20	26	0	0	30	20	20	26	42	0	0	28	0	0	0	385	273	0	0	0	25	199	534	51	0	0	0	409	398	250	107	64	28	46	37	47	41	35	26	123	80	46
Bacteria_Cyanobacteria_Cyanobacteriia_Cyanobacteriales_Cyanobacteriales Incertae Sedis_Phormidium SAG 81.79	430	97	0	0	0	0	121	0	0	0	0	0	406	78	0	0	0	0	70	156	102	117	0	0	110	172	107	104	57	0	80	125	156	41	0	0	0	0	0	0	0	0	0	0	0	0	0	0	0
Bacteria_Cyanobacteria_Cyanobacteriia_Cyanobacteriales_Cyanobacteriales Incertae Sedis_uncultured	0	0	0	0	0	0	0	0	0	0	0	0	0	0	0	0	0	0	0	0	0	0	0	0	0	0	0	0	0	0	0	0	0	0	0	0	0	0	0	32	0	0	0	0	26	0	0	0	0
Bacteria_Cyanobacteria_Cyanobacteriia_Cyanobacteriales_Desertifilaceae_CENA533	0	0	0	0	0	0	0	0	0	0	0	0	0	0	0	0	0	0	0	0	0	0	0	0	31	0	0	0	0	0	29	0	0	0	0	0	14	24	10	0	11	14	20	10	10	0	19	16	14
Bacteria_Cyanobacteria_Cyanobacteriia_Cyanobacteriales_Desertifilaceae_Desertifilum KR2012-2	0	0	0	0	0	0	0	0	0	19	0	0	0	0	0	0	0	0	0	0	0	0	0	0	0	0	0	0	0	0	0	0	0	0	0	0	141	0	41	0	0	0	0	0	0	0	37	31	0
Bacteria_Cyanobacteria_Cyanobacteriia_Cyanobacteriales_Desertifilaceae_Hormoscilla SI04-45	203	157	46	60	141	1054	241	78	61	67	138	1366	76	61	47	64	200	1193	71	185	36	32	0	0	112	66	65	44	55	0	1149	116	19	26	0	0	69	95	64	93	71	74	137	97	96	16	29	49	58
Bacteria_Cyanobacteria_Cyanobacteriia_Cyanobacteriales_Desertifilaceae_Oscillatoria	0	0	0	0	0	0	0	0	0	0	0	0	0	0	0	0	0	0	0	0	0	0	0	0	0	0	0	0	0	0	0	0	0	0	0	0	0	20	19	0	19	23	21	26	0	0	0	20	0
Bacteria_Cyanobacteria_Cyanobacteriia_Cyanobacteriales_Desertifilaceae_Oscillatoria SAG8.92	0	0	0	0	0	0	0	0	0	0	0	0	0	0	0	0	0	0	0	0	0	0	0	0	22	0	0	0	0	0	23	18	0	0	0	0	52	83	82	66	89	92	115	97	118	34	50	47	51
Bacteria_Cyanobacteria_Cyanobacteriia_Cyanobacteriales_Desertifilaceae_Roseofilum AO1-A	26	29	19	23	0	0	17	0	0	0	0	0	0	27	22	0	0	0	153	100	127	244	0	0	295	99	76	21	47	0	537	73	0	0	0	0	23	61	40	14	18	12	11	0	0	0	36	33	15
Bacteria_Cyanobacteria_Cyanobacteriia_Cyanobacteriales_Geitlerinemaceae_Geitlerinema PCC-7105	2248	1120	76	66	59	25	877	1111	58	27	31	39	1936	714	51	36	64	0	172	111	149	258	264	172	295	109	59	139	109	110	144	56	81	159	252	193	49	91	41	28	62	34	63	53	103	94	49	46	13
Bacteria_Cyanobacteria_Cyanobacteriia_Cyanobacteriales_Geitlerinemaceae_Geitlerinema PCC-9228	236	323	337	334	415	562	263	382	230	257	280	401	259	311	359	321	322	1234	131	337	281	314	87	75	198	252	377	401	142	60	120	256	278	266	48	0	13	83	78	31	28	22	17	15	20	14	44	44	38
Bacteria_Cyanobacteria_Cyanobacteriia_Cyanobacteriales_Gloeocapsaceae_Gloeocapsa	904	309	337	186	40	21	383	353	283	86	29	26	504	453	189	115	315	1030	2974	2728	895	720	38	67	3040	2070	820	491	1391	20	3808	2694	340	224	0	0	473	500	522	343	487	427	467	352	318	192	405	676	290
Bacteria_Cyanobacteria_Cyanobacteriia_Cyanobacteriales_Microcystaceae_Aphanotece	0	0	0	0	0	0	0	0	0	0	0	0	0	0	0	0	0	0	0	0	0	0	0	0	0	0	0	0	21	0	0	16	0	0	0	0	461	962	951	199	235	72	30	27	19	0	2345	446	247
Bacteria_Cyanobacteria_Cyanobacteriia_Cyanobacteriales_Microcystaceae_Atelocyanobacterium (UCYN-A)	2937	2352	1704	2082	110	0	2884	2796	1054	1395	0	0	2276	1952	2427	1864	151	51	9606	9117	2527	1363	118	140	9506	6974	1947	751	10161	422	10054	8741	875	90	0	31	2778	11603	6154	1216	740	347	493	177	502	78	6633	4734	2485
Bacteria_Cyanobacteria_Cyanobacteriia_Cyanobacteriales_Microcystaceae_Chalicogloea CCALA 975	88	67	0	25	0	0	70	53	0	29	0	0	65	54	24	23	0	0	78	72	34	29	0	0	102	36	33	43	52	0	154	63	0	0	0	0	147	326	160	162	147	129	174	86	118	28	188	185	103
Bacteria_Cyanobacteria_Cyanobacteriia_Cyanobacteriales_Microcystaceae_Crocosphaera	0	0	0	0	0	0	0	0	0	0	0	0	0	0	0	0	0	0	260	394	88	63	0	0	256	200	59	0	0	0	256	692	87	0	0	0	0	0	0	0	0	0	0	0	0	0	0	0	0
Bacteria_Cyanobacteria_Cyanobacteriia_Cyanobacteriales_Microcystaceae_Cyanothece ATCC 51142 (UCYN-C)	623	540	372	441	28	0	444	493	180	122	0	0	533	304	572	347	81	0	6730	4996	2401	2164	412	179	6820	4949	2417	2356	2227	318	7281	5965	1620	250	0	0	1746	5362	6523	4413	9946	5375	4445	850	1016	421	3472	6926	4852
Bacteria_Cyanobacteria_Cyanobacteriia_Cyanobacteriales_Microcystaceae_Cyanothece PCC-7424	140	178	210	190	175	0	166	170	145	139	147	0	100	144	124	146	78	0	282	171	108	25	0	0	445	115	115	52	194	0	516	207	0	0	0	0	0	0	0	0	0	0	0	0	0	0	0	0	0
Bacteria_Cyanobacteria_Cyanobacteriia_Cyanobacteriales_Microcystaceae_Cyanothece PCC-8801	2340	2951	2630	2260	1063	1327	2223	3976	1570	1538	667	1071	3060	1932	3571	2278	958	1048	7178	10295	3842	6194	253	925	8384	8045	5146	5687	2966	337	6330	9902	3105	1504	146	100	2675	8593	7830	3839	7300	3718	2878	571	785	265	4664	6977	4869
Bacteria_Cyanobacteria_Cyanobacteriia_Cyanobacteriales_Microcystaceae_Gloeothece PCC-6501	282	201	52	48	0	0	175	133	112	21	0	0	156	121	49	0	0	0	1422	961	333	173	23	90	2003	686	589	307	1127	46	2496	879	60	0	0	0	16	17	21	0	0	15	12	12	0	0	11	0	0
Bacteria_Cyanobacteria_Cyanobacteriia_Cyanobacteriales_Microcystaceae_Merismopedia 0BB39S01	29	62	19	0	0	0	19	35	19	0	0	0	28	55	44	0	0	0	29	77	184	235	0	30	58	40	193	149	44	22	52	48	155	491	37	0	31	26	13	13	0	0	0	0	0	0	24	16	0
Bacteria_Cyanobacteria_Cyanobacteriia_Cyanobacteriales_Microcystaceae_Microcystis PCC-7914	6726	2115	505	217	160	161	1900	450	384	158	108	99	4647	3657	451	414	116	84	1471	1159	942	958	168	77	1176	772	395	328	356	78	2278	757	251	151	113	184	1437	1167	984	993	906	740	1317	917	1017	216	798	834	818
Bacteria_Cyanobacteria_Cyanobacteriia_Cyanobacteriales_Microcystaceae_Pleurocapsa PCC-7327	97	54	52	0	0	0	67	31	44	0	0	0	64	59	34	0	0	0	241	256	92	120	75	0	300	169	104	30	240	0	576	103	0	0	0	0	23	0	22	0	0	0	0	0	0	0	13	0	0
Bacteria_Cyanobacteria_Cyanobacteriia_Cyanobacteriales_Microcystaceae_SU2 symbiont group	3740	3818	4648	2650	167	45	2284	5033	2023	2347	48	28	5251	3253	5322	3553	258	27	24384	27983	13122	12502	1041	2239	22014	20512	10135	11856	16192	895	19588	29547	8185	1554	0	58	15682	19548	21550	4657	11527	6009	7297	3888	5989	1508	21273	12982	8068
Bacteria_Cyanobacteria_Cyanobacteriia_Cyanobacteriales_Microcystaceae_Snowella 0TU37S04	2476	1082	191	106	0	0	809	925	92	29	19	0	1447	794	88	144	0	0	3088	1403	845	709	163	0	3246	1179	2098	1053	3711	419	7144	1186	131	0	0	0	5220	8370	9793	4953	505	873	1687	354	372	165	4394	7003	7622
Bacteria_Cyanobacteria_Cyanobacteriia_Cyanobacteriales_Microcystaceae_Synechocystis BDHKU-20401	201	108	35	54	0	20	77	131	41	27	0	22	155	100	76	35	0	46	233	115	82	65	52	42	209	138	59	46	64	53	300	186	54	0	43	0	109	356	370	381	466	491	638	477	628	278	149	307	368
Bacteria_Cyanobacteria_Cyanobacteriia_Cyanobacteriales_Microcystaceae_Synechocystis CCALA 700	163	79	0	0	0	0	101	41	0	0	0	0	108	66	0	0	0	0	158	66	52	26	0	0	251	89	66	0	144	0	458	68	0	0	0	0	0	0	39	102	0	15	32	12	0	0	0	33	39
Bacteria_Cyanobacteria_Cyanobacteriia_Cyanobacteriales_Microcystaceae_Synechocystis PCC-6803	5704	3696	703	668	75	45	4185	2326	580	264	73	56	3764	2883	681	1757	80	33	9215	5360	2322	1799	500	342	11943	6428	3784	1548	7795	548	14871	4470	776	185	38	175	23389	39376	37413	35721	21110	19327	20533	17576	17780	12625	23198	33357	26996
Bacteria_Cyanobacteria_Cyanobacteriia_Cyanobacteriales_Microcystaceae_UCYN-C	2008	1809	1187	1652	0	0	1237	1983	706	579	0	35	1728	1718	2412	846	24	0	23143	20644	9203	4228	469	191	23492	14635	4700	2579	37633	1331	21691	21931	3963	303	0	70	4488	14991	8657	1791	1711	441	234	82	750	59	7961	7643	2910
Bacteria_Cyanobacteria_Cyanobacteriia_Cyanobacteriales_Microcystaceae_uncultured	0	0	0	0	0	0	0	0	0	0	0	0	0	0	0	0	0	0	0	0	0	0	0	0	31	0	0	0	0	0	0	0	0	0	0	0	0	17	0	0	0	0	0	0	0	0	0	0	0
Bacteria_Cyanobacteria_Cyanobacteriia_Cyanobacteriales_Nostocaceae_Aetokthonos AEL04	0	0	0	0	0	0	0	0	0	0	0	0	0	0	0	0	0	0	0	0	0	0	0	0	0	0	0	0	0	0	0	0	0	0	0	0	0	0	0	0	14	0	14	0	0	0	0	0	0
Bacteria_Cyanobacteria_Cyanobacteriia_Cyanobacteriales_Nostocaceae_Anabaena BECID22	0	0	0	0	0	0	0	0	0	0	0	0	0	0	0	0	0	0	0	0	0	0	0	0	0	0	0	0	0	0	0	0	0	0	0	0	4166	11311	10342	10604	11764	7825	13357	4966	24758	1616	5986	7644	3847
Bacteria_Cyanobacteria_Cyanobacteriia_Cyanobacteriales_Nostocaceae_Anabaena HBU1	0	0	0	0	0	0	0	0	0	0	0	0	0	0	0	0	0	0	0	0	0	0	0	0	0	0	0	0	0	0	0	0	0	0	0	0	0	0	0	0	0	0	23	0	36	0	0	0	0
Bacteria_Cyanobacteria_Cyanobacteriia_Cyanobacteriales_Nostocaceae_Anabaena PCC-7108	0	0	0	0	0	0	0	0	0	0	0	0	0	0	0	0	0	0	0	0	0	0	0	0	0	0	0	0	0	0	0	0	0	0	0	0	411	37	51	0	0	0	56	48	58	0	0	0	0
Bacteria_Cyanobacteria_Cyanobacteriia_Cyanobacteriales_Nostocaceae_Anabaena PCC-7122	464	741	550	496	549	0	237	491	502	380	67	0	375	535	1199	656	286	52	231	452	130	224	0	0	311	322	189	269	129	0	194	397	156	0	0	0	4832	1953	1805	1665	2469	1210	3166	1869	2934	351	1278	1685	1581
Bacteria_Cyanobacteria_Cyanobacteriia_Cyanobacteriales_Nostocaceae_Anabaena XPORK15F	36	90	37	75	0	0	220	60	23	24	48	0	39	45	50	29	116	37	92	167	86	141	0	0	188	150	214	148	74	979	131	149	255	135	0	0	363	1033	882	270	2216	1003	981	608	1058	641	510	787	375
Bacteria_Cyanobacteria_Cyanobacteriia_Cyanobacteriales_Nostocaceae_Ancylothrix 8PC	0	0	0	0	0	0	0	0	0	0	0	0	0	0	0	0	0	0	0	36	0	0	0	0	18	23	0	0	0	0	27	24	0	0	0	0	0	0	0	0	0	0	0	0	0	0	0	0	0
Bacteria_Cyanobacteria_Cyanobacteriia_Cyanobacteriales_Nostocaceae_Aphanizomenon MDT14a	93	78	99	64	0	0	71	106	45	47	0	0	58	76	58	0	0	0	101	90	0	0	0	0	207	119	0	0	0	0	199	112	0	0	0	0	1020	962	1044	1264	1129	862	1974	1264	1189	188	518	783	890
Bacteria_Cyanobacteria_Cyanobacteriia_Cyanobacteriales_Nostocaceae_Aphanizomenon NIES81	17396	25033	34005	27035	7886	1515	15993	24500	23988	18734	1877	1187	13778	20655	33984	24986	6692	1732	723	1858	1124	689	0	0	916	1038	1053	1108	84	0	1160	1112	2033	744	0	114	202785	696538	594582	932388	794700	555323	1532538	879028	901046	87871	348697	423481	513495
Bacteria_Cyanobacteria_Cyanobacteriia_Cyanobacteriales_Nostocaceae_Calothrix NIES-2100	0	0	0	0	0	0	0	0	0	0	0	0	0	0	0	0	0	0	0	0	0	0	0	0	0	0	0	0	0	0	0	0	0	0	0	0	0	0	0	0	0	0	0	0	0	0	0	0	0
Bacteria_Cyanobacteria_Cyanobacteriia_Cyanobacteriales_Nostocaceae_Calothrix PCC-6303	2096	1014	137	110	68	31	873	429	121	109	47	36	6016	914	147	154	56	50	507	300	158	125	24	34	524	219	144	110	164	33	554	214	103	75	40	0	9628	13996	6856	20146	7076	6668	17820	2743	2975	310	8540	6296	5931
Bacteria_Cyanobacteria_Cyanobacteriia_Cyanobacteriales_Nostocaceae_Calothrix PMC232.04	0	31	0	27	0	0	0	0	0	0	0	0	0	0	0	0	0	0	0	0	0	0	0	0	0	0	0	0	0	0	0	0	0	0	0	0	686	250	314	356	372	288	615	461	420	65	229	232	294
Bacteria_Cyanobacteria_Cyanobacteriia_Cyanobacteriales_Nostocaceae_Calothrix UAM 374	0	0	0	0	0	0	0	0	0	0	0	0	28	0	0	0	0	0	0	34	0	0	0	0	54	0	0	0	0	0	40	0	0	0	0	0	377	144	257	89	103	137	95	78	90	23	109	211	99
Bacteria_Cyanobacteria_Cyanobacteriia_Cyanobacteriales_Nostocaceae_Chlorogloeopsis PCC-7518	0	0	0	0	0	0	0	0	0	0	0	0	0	0	0	0	0	0	50	0	72	38	0	0	57	0	0	0	34	0	248	0	0	0	0	0	276	132	307	198	190	155	253	294	165	11	98	188	278
Bacteria_Cyanobacteria_Cyanobacteriia_Cyanobacteriales_Nostocaceae_Cuspidothrix LMECYA 163	1144	2851	2171	1863	1772	193	1039	1681	1521	1829	390	55	1137	1591	3432	1394	1635	445	412	1344	796	1078	0	51	521	830	570	668	316	0	209	1078	878	43	0	0	2796	2107	2714	3615	2303	1431	4283	3283	5027	484	1489	1801	2047
Bacteria_Cyanobacteria_Cyanobacteriia_Cyanobacteriales_Nostocaceae_Cylindrospermopsis CRJ1	1892	1866	2423	2045	1479	318	1366	1308	1882	1281	270	196	1423	2192	1748	1346	1273	125	1437	2235	1989	1440	0	690	1388	1689	2314	1911	818	1004	1534	1690	2098	1157	0	0	508	711	622	446	1015	639	873	604	665	325	384	488	325
Bacteria_Cyanobacteria_Cyanobacteriia_Cyanobacteriales_Nostocaceae_Cylindrospermum CENA33	0	0	0	0	0	0	0	0	0	0	0	0	0	0	0	0	0	0	0	0	0	0	0	0	0	0	0	0	0	0	0	0	0	0	0	0	189	0	0	0	0	0	0	0	0	0	45	0	0
Bacteria_Cyanobacteria_Cyanobacteriia_Cyanobacteriales_Nostocaceae_Cylindrospermum NQAIF308	0	0	0	0	0	0	0	0	0	0	0	0	0	0	0	0	0	0	0	0	0	0	0	0	0	0	0	0	0	0	0	0	0	0	0	0	0	0	0	0	0	0	0	0	0	0	0	0	0
Bacteria_Cyanobacteria_Cyanobacteriia_Cyanobacteriales_Nostocaceae_Cylindrospermum PCC-7417	0	0	0	0	0	0	0	0	0	0	0	0	0	80	0	0	0	0	146	0	156	0	0	0	0	0	0	0	0	0	0	0	0	0	0	0	166	145	221	193	174	152	270	252	200	25	73	140	223
Bacteria_Cyanobacteria_Cyanobacteriia_Cyanobacteriales_Nostocaceae_Cylindrospermum PMC238.04	0	0	0	0	0	0	0	0	0	0	0	0	0	0	0	0	0	0	0	0	0	0	0	0	18	0	0	0	0	0	41	0	0	0	0	0	154	15	0	0	0	0	0	0	0	0	30	0	14
Bacteria_Cyanobacteria_Cyanobacteriia_Cyanobacteriales_Nostocaceae_Desmonostoc PCC-7422	82	39	30	34	52	0	34	30	46	0	0	0	0	34	40	40	0	0	230	97	109	73	92	0	197	70	48	68	0	0	302	68	0	0	148	0	621	543	477	499	339	321	499	330	341	62	334	543	459
Bacteria_Cyanobacteria_Cyanobacteriia_Cyanobacteriales_Nostocaceae_Dolichospermum NIES41	4145	5528	6984	4683	2160	208	3526	5890	4582	3506	563	213	3401	4461	6743	4450	1511	602	328	458	223	128	35	0	333	305	210	167	189	47	400	304	401	119	0	145	7447	7419	10878	12565	8911	10497	17513	10123	9942	1572	4596	8577	8671
Bacteria_Cyanobacteria_Cyanobacteriia_Cyanobacteriales_Nostocaceae_Ewamiania TS0513	17	0	0	19	0	0	0	0	0	0	0	0	0	0	0	0	0	0	0	18	0	0	0	0	22	0	0	0	0	0	32	0	0	0	0	25	73	61	44	54	43	26	65	60	34	0	49	53	34
Bacteria_Cyanobacteria_Cyanobacteriia_Cyanobacteriales_Nostocaceae_Fischerella CENA298	0	0	0	0	0	0	0	0	0	0	0	0	0	0	0	0	0	0	39	0	0	0	0	0	39	0	0	0	0	0	37	0	0	0	0	0	17	16	0	0	0	12	16	0	0	0	15	0	0
Bacteria_Cyanobacteria_Cyanobacteriia_Cyanobacteriales_Nostocaceae_Fischerella PCC-9339	46	82	86	96	41	40	54	91	64	63	63	35	55	49	66	161	33	0	486	194	91	108	291	152	239	302	101	66	101	132	607	166	61	63	498	734	1842	1152	1193	1406	1249	958	2115	1518	1454	224	890	973	997
Bacteria_Cyanobacteria_Cyanobacteriia_Cyanobacteriales_Nostocaceae_Fortiea PCC-7126	0	0	0	0	0	0	0	0	0	0	0	0	0	0	0	0	0	0	0	0	0	0	0	0	0	0	0	0	0	0	0	0	0	0	0	0	250	0	0	0	0	0	0	0	0	0	32	0	0
Bacteria_Cyanobacteria_Cyanobacteriia_Cyanobacteriales_Nostocaceae_Gloeotrichia PYH6	0	0	0	0	0	0	0	0	0	0	0	0	0	0	0	0	0	0	0	0	0	0	0	0	0	0	0	0	0	0	0	0	0	0	0	0	0	0	0	0	0	0	0	0	0	0	0	0	0
Bacteria_Cyanobacteria_Cyanobacteriia_Cyanobacteriales_Nostocaceae_Gloeotrichia SAG 32.84	0	32	0	44	37	0	0	0	46	0	72	76	0	0	39	67	39	41	0	0	70	67	335	292	0	0	54	81	133	419	0	0	83	53	264	367	373	160	185	155	190	146	259	268	293	61	132	117	160
Bacteria_Cyanobacteria_Cyanobacteriia_Cyanobacteriales_Nostocaceae_Halotia CENA158	0	0	30	0	0	0	0	0	0	0	0	0	0	0	0	0	0	0	0	0	0	0	0	0	0	0	0	0	0	0	0	0	0	0	0	0	197	60	39	50	70	46	73	40	48	0	42	36	39
Bacteria_Cyanobacteria_Cyanobacteriia_Cyanobacteriales_Nostocaceae_Iphinoe LOS-B1	44	34	26	24	0	0	43	34	16	0	0	0	22	56	31	27	0	0	142	88	45	25	0	0	288	21	45	0	0	0	96	42	0	0	0	0	183	30	36	36	11	22	23	12	16	0	55	44	25
Bacteria_Cyanobacteria_Cyanobacteriia_Cyanobacteriales_Nostocaceae_Mastigocladopsis PCC-10914	221	268	267	213	147	0	213	333	185	213	49	0	202	236	349	214	96	0	0	0	0	35	457	241	61	0	0	0	50	97	0	0	0	0	398	106	804	341	308	340	306	252	614	391	479	86	294	236	283
Bacteria_Cyanobacteria_Cyanobacteriia_Cyanobacteriales_Nostocaceae_Mastigocoleus BC008	0	0	0	0	0	0	0	0	0	0	0	0	0	0	0	0	0	0	0	0	0	0	0	0	0	0	0	0	0	0	68	0	0	0	0	0	32	0	0	0	0	0	23	0	0	0	16	0	0
Bacteria_Cyanobacteria_Cyanobacteriia_Cyanobacteriales_Nostocaceae_Nodularia PCC-9350	605	941	719	920	391	60	1381	784	589	790	129	73	1175	2002	748	705	672	659	663	1272	896	806	0	0	825	1114	1268	755	349	0	839	1245	469	213	0	0	854449	21978	28510	16600	16712	6854	18907	13645	24010	4676	136636	33713	26191
Bacteria_Cyanobacteria_Cyanobacteriia_Cyanobacteriales_Nostocaceae_Nostoc 0708	0	0	0	0	0	0	0	0	0	0	0	0	0	0	0	0	0	0	0	0	0	0	0	0	0	0	0	0	0	0	0	0	0	0	0	0	0	0	0	0	0	0	0	0	22	0	0	0	0
Bacteria_Cyanobacteria_Cyanobacteriia_Cyanobacteriales_Nostocaceae_Nostoc BDU-40302	0	0	0	0	0	0	0	0	0	0	0	0	0	0	0	0	0	0	0	0	0	0	0	0	0	0	0	0	0	0	0	0	0	0	0	0	388	0	0	0	0	0	43	0	42	0	71	0	0
Bacteria_Cyanobacteria_Cyanobacteriia_Cyanobacteriales_Nostocaceae_Nostoc PCC-7107	235	235	182	155	129	58	199	185	147	119	65	80	212	225	208	303	116	53	241	262	153	162	166	69	367	229	164	132	195	112	491	255	123	112	199	131	4090	2123	2296	2616	2402	1733	3883	2724	2688	361	1881	1809	1813
Bacteria_Cyanobacteria_Cyanobacteriia_Cyanobacteriales_Nostocaceae_Nostoc PCC-73102	726	689	603	563	485	340	622	678	466	419	258	315	701	565	596	497	332	248	2133	1153	613	510	150	110	1483	768	571	541	718	112	1876	1655	528	240	102	0	5219	2443	2594	2772	3304	2096	4888	3449	3751	519	1913	2187	1990
Bacteria_Cyanobacteria_Cyanobacteriia_Cyanobacteriales_Nostocaceae_Nostoc PCC-7524	608	961	919	708	539	129	476	845	607	654	185	66	627	734	1256	766	602	129	640	652	318	560	57	0	554	431	334	356	195	49	516	655	320	76	0	0	6499	4152	4908	3929	5251	4581	7605	5396	4533	1141	3104	5266	3326
Bacteria_Cyanobacteria_Cyanobacteriia_Cyanobacteriales_Nostocaceae_Nostoc PCC-8976	89	113	115	100	68	41	54	103	62	83	35	71	147	56	94	91	110	0	637	350	94	78	0	0	322	139	72	79	37	29	547	320	52	27	0	0	1525	1953	2681	2786	3756	3510	6839	5723	5794	1221	1251	2546	1775
Bacteria_Cyanobacteria_Cyanobacteriia_Cyanobacteriales_Nostocaceae_Nostoc SAG 60.79	167	316	295	436	465	220	210	216	339	338	259	263	87	248	353	353	309	271	119	0	0	112	0	0	88	0	0	0	0	0	0	0	0	84	0	0	0	86	47	0	41	38	59	0	30	0	42	44	33
Bacteria_Cyanobacteria_Cyanobacteriia_Cyanobacteriales_Nostocaceae_Petalonema ANT.LG2.8	61	34	0	0	0	0	0	0	0	0	0	0	0	0	0	0	0	0	57	0	0	0	0	0	0	0	0	0	0	0	0	0	0	0	0	0	242	93	79	62	113	67	161	85	133	0	85	80	56
Bacteria_Cyanobacteria_Cyanobacteriia_Cyanobacteriales_Nostocaceae_Phyllonema CENA325	0	0	0	0	0	0	0	0	0	0	0	0	0	0	0	0	0	0	0	0	0	0	0	0	0	0	0	0	0	0	0	0	0	0	0	0	0	0	21	16	0	0	26	17	0	0	0	0	0
Bacteria_Cyanobacteria_Cyanobacteriia_Cyanobacteriales_Nostocaceae_Richelia HH01	329	354	0	0	0	0	391	305	0	0	0	0	220	171	0	0	0	0	212	0	170	0	0	0	510	40	0	0	0	0	807	80	0	0	0	0	555	1166	348	140	281	207	126	252	118	0	916	587	245
Bacteria_Cyanobacteria_Cyanobacteriia_Cyanobacteriales_Nostocaceae_Rivularia PCC-7116	799	325	121	120	82	57	2643	254	160	85	59	36	387	1430	129	105	75	54	366	197	276	242	75	66	986	192	250	284	98	97	2332	545	250	257	88	46	2799	2677	1246	1615	1341	1022	2419	1549	1569	303	2716	1391	1113
Bacteria_Cyanobacteria_Cyanobacteriia_Cyanobacteriales_Nostocaceae_Scytonema PCC-7110	270	337	354	377	316	188	266	338	352	428	247	103	242	333	292	256	227	179	198	170	94	101	0	0	191	130	94	91	67	0	237	163	65	50	25	0	386	429	373	417	430	306	613	373	455	68	227	369	280
Bacteria_Cyanobacteria_Cyanobacteriia_Cyanobacteriales_Nostocaceae_Scytonema UCFS19	0	0	0	0	0	0	0	0	0	0	0	0	0	0	0	0	0	0	0	0	0	0	0	0	0	0	0	0	0	0	0	0	0	0	0	0	0	0	0	0	0	0	0	0	12	0	0	0	0
Bacteria_Cyanobacteria_Cyanobacteriia_Cyanobacteriales_Nostocaceae_Scytonema UTEX 2349	130	121	76	59	44	0	87	68	46	39	24	0	84	93	69	57	39	35	165	193	67	51	56	40	127	209	44	0	45	37	498	121	0	35	48	0	927	1301	648	822	646	497	1052	774	842	72	588	608	583
Bacteria_Cyanobacteria_Cyanobacteriia_Cyanobacteriales_Nostocaceae_Scytonema VB-61278	36	35	58	54	0	0	0	24	24	28	0	0	0	36	0	39	0	0	426	325	188	171	0	0	336	322	119	36	76	0	380	279	118	0	0	0	289	199	172	158	80	53	131	57	46	0	100	349	51
Bacteria_Cyanobacteria_Cyanobacteriia_Cyanobacteriales_Nostocaceae_Sphaerospermopsis BCCUSP55	1042	1569	1799	2343	1471	297	984	1329	1374	1048	420	99	1092	1401	1742	1358	2000	633	954	2382	1975	1766	36	181	1645	1636	2490	2157	1381	3539	1024	1737	2961	1588	0	0	1392	2667	2404	1385	6558	2863	2862	2866	3376	1894	1500	2171	1376
Bacteria_Cyanobacteria_Cyanobacteriia_Cyanobacteriales_Nostocaceae_Stigonema SAG 48.90	129	79	50	38	0	0	63	97	163	29	0	0	97	69	50	28	0	0	270	126	31	38	0	36	505	286	71	32	47	39	519	85	0	0	0	0	502	203	191	119	185	141	209	220	240	53	192	184	144
Bacteria_Cyanobacteria_Cyanobacteriia_Cyanobacteriales_Nostocaceae_Synechococcus PCC-7902	30	29	19	0	0	0	37	39	20	0	0	0	34	43	25	30	0	0	22	43	0	19	0	0	0	23	22	0	0	0	22	30	24	0	0	0	37	11	0	0	0	0	10	0	0	0	0	0	0
Bacteria_Cyanobacteria_Cyanobacteriia_Cyanobacteriales_Nostocaceae_Tolypothrix	304	373	231	235	117	45	296	292	202	156	83	0	261	273	285	277	284	104	759	703	405	285	0	0	738	567	457	306	274	93	718	666	273	102	0	0	7453	3723	4168	3561	3740	3140	6039	4460	5231	625	3218	3150	3269
Bacteria_Cyanobacteria_Cyanobacteriia_Cyanobacteriales_Nostocaceae_Trichormus HINDAK 2001-4	0	0	0	0	0	0	0	0	0	0	0	0	0	0	0	0	0	0	0	0	0	0	0	0	74	0	0	0	0	0	0	0	0	0	0	0	397	234	261	466	301	282	549	346	391	54	179	265	240
Bacteria_Cyanobacteria_Cyanobacteriia_Cyanobacteriales_Nostocaceae_uncultured	193	141	68	56	30	25	142	102	77	60	26	41	125	127	76	99	24	38	127	201	64	63	43	35	187	138	61	54	92	40	176	117	63	0	117	51	1373	1418	810	734	791	661	1266	865	900	154	857	837	1622
Bacteria_Cyanobacteria_Cyanobacteriia_Cyanobacteriales_Oscillatoriaceae_Oscillatoria PCC-10802	49	39	20	32	19	0	27	26	57	19	0	0	0	32	22	26	0	0	48	45	0	0	30	26	72	29	32	0	28	27	46	50	0	0	36	0	149	179	199	113	107	91	174	112	141	178	128	149	106
Bacteria_Cyanobacteria_Cyanobacteriia_Cyanobacteriales_Oscillatoriaceae_Oscillatoria PCC-6304	736	910	693	889	1138	1471	663	954	502	497	764	1033	602	588	1016	769	798	772	403	1815	806	884	194	101	4126	835	1017	1153	459	131	376	920	938	821	228	39	155	269	213	149	184	167	226	210	286	126	209	218	151
Bacteria_Cyanobacteria_Cyanobacteriia_Cyanobacteriales_Oscillatoriaceae_Oxynema BDU 92071	0	0	0	0	0	0	0	15	0	0	15	0	27	0	0	0	0	0	35	651	0	0	0	0	2294	0	0	0	15	0	37	59	0	0	0	21	41	52	49	33	35	59	26	41	35	14	28	51	27
Bacteria_Cyanobacteria_Cyanobacteriia_Cyanobacteriales_Oscillatoriaceae_Phormidium ETS-05	0	0	19	0	0	0	0	0	0	0	0	0	0	0	0	33	0	0	0	30	0	0	0	0	0	0	0	0	0	0	0	0	0	0	0	0	88	0	155	11	0	0	0	0	0	0	14	0	0
Bacteria_Cyanobacteria_Cyanobacteriia_Cyanobacteriales_Oscillatoriaceae_Planktothricoides SR001	59	0	0	0	18	0	18	0	0	0	0	0	0	104	0	0	24	0	428	2668	234	29	0	0	10748	308	85	20	0	0	257	470	0	0	0	0	766	1134	111	47	39	14	55	23	29	0	365	134	365
Bacteria_Cyanobacteria_Cyanobacteriia_Cyanobacteriales_Oscillatoriaceae_uncultured	188	92	0	0	0	0	41	0	0	18	0	0	1286	729	0	0	0	0	159	5004	16	22	27	17	3248	399	136	0	43	18	898	40	0	15	18	0	58	0	14	0	13	12	22	10	0	0	13	20	0
Bacteria_Cyanobacteria_Cyanobacteriia_Cyanobacteriales_Paraspirulinaceae_ESFC-1	43	0	0	0	0	0	0	0	0	0	0	0	0	0	0	0	0	0	67	45	0	41	0	0	81	72	0	39	0	0	106	0	0	0	0	0	103	39	42	15	27	35	29	52	40	20	50	44	24
Bacteria_Cyanobacteria_Cyanobacteriia_Cyanobacteriales_Paraspirulinaceae_Halospirulina CCC Baja-95 Cl.2	946	988	560	565	489	607	760	846	449	399	374	542	685	798	607	486	389	484	1057	1012	677	650	83	44	539	734	650	690	390	64	1152	697	570	571	95	0	316	463	723	370	166	132	176	89	97	115	217	412	472
Bacteria_Cyanobacteria_Cyanobacteriia_Cyanobacteriales_Paraspirulinaceae_Spirulina CCC Snake P-Y-85	77	83	159	79	28	49	104	57	69	64	36	90	110	189	98	108	56	748	172	237	100	159	27	0	157	148	33	53	68	0	253	116	33	0	0	0	252	209	179	129	172	160	221	123	160	99	145	215	132
Bacteria_Cyanobacteria_Cyanobacteriia_Cyanobacteriales_Paraspirulinaceae_Spirulina DRTO-55.2	437	406	178	270	0	0	253	385	107	75	0	19	470	386	345	184	0	0	3767	3062	819	728	72	0	3543	2623	724	387	2110	123	5071	2585	262	0	0	0	2527	7975	4731	920	239	133	135	73	304	34	3907	4355	1781
Bacteria_Cyanobacteria_Cyanobacteriia_Cyanobacteriales_Paraspirulinaceae_Spirulina P7	324	87	0	0	0	0	371	64	0	0	0	0	399	107	0	0	0	0	2526	681	2174	1101	762	0	3023	561	379	28	552	0	6010	105	268	0	0	0	573	20	24	0	57	0	38	26	24	0	194	27	41
Bacteria_Cyanobacteria_Cyanobacteriia_Cyanobacteriales_Paraspirulinaceae_Spirulina PCC-6313	57	39	0	0	0	0	37	23	0	0	0	0	35	23	0	0	0	0	0	0	0	0	0	0	235	0	0	0	24	0	140	0	0	0	0	0	57	26	39	36	43	23	29	30	15	0	0	20	26
Bacteria_Cyanobacteria_Cyanobacteriia_Cyanobacteriales_Paraspirulinaceae_Spirulina PCC-9445	17	29	0	0	0	0	0	0	0	0	0	0	0	0	0	0	0	0	58	58	56	40	0	0	152	64	59	37	69	0	201	58	21	0	0	0	17	0	0	0	0	0	0	0	0	0	12	0	0
Bacteria_Cyanobacteria_Cyanobacteriia_Cyanobacteriales_Paraspirulinaceae_uncultured	56	0	0	0	0	0	0	0	0	0	0	0	0	0	0	0	0	0	0	0	0	0	157	0	0	0	0	0	0	0	72	0	0	0	0	0	136	122	188	89	227	190	173	133	122	87	96	129	114
Bacteria_Cyanobacteria_Cyanobacteriia_Cyanobacteriales_Phormidiaceae_Aerosakkonema Lao26	0	0	0	0	0	0	0	0	0	0	0	0	0	0	0	0	0	0	618	128	222	149	49	0	497	203	77	25	113	0	758	0	0	0	0	0	0	0	0	0	0	0	0	0	0	0	0	0	0
Bacteria_Cyanobacteria_Cyanobacteriia_Cyanobacteriales_Phormidiaceae_Arthrospira PCC-7345	4190	2157	25	154	22	0	251	208	35	21	0	0	596	1078	158	62	0	0	11804	8231	7825	5884	57	73	26083	8197	5725	1071	1555	103	33786	4334	475	25	36	40	3724	173	145	125	152	150	175	115	144	68	540	116	173
Bacteria_Cyanobacteria_Cyanobacteriia_Cyanobacteriales_Phormidiaceae_Cephalothrix SAG 75.79	49	45	0	41	21	0	37	31	24	20	20	0	36	35	35	38	35	0	49	47	23	0	0	0	77	28	0	0	0	0	71	40	0	0	0	0	290	158	110	69	85	76	92	68	62	30	89	122	38
Bacteria_Cyanobacteria_Cyanobacteriia_Cyanobacteriales_Phormidiaceae_Kamptonema PCC-6407	0	0	0	0	0	0	0	0	0	0	0	0	0	0	0	0	0	0	51	0	0	0	0	0	0	0	0	0	0	0	0	0	0	0	0	0	193	88	115	94	83	75	143	100	76	15	296	55	82
Bacteria_Cyanobacteria_Cyanobacteriia_Cyanobacteriales_Phormidiaceae_Lyngbya PCC-7419	170	136	93	62	46	0	126	418	74	86	127	35	316	544	355	266	0	0	10285	1589	1916	301	195	77	6324	799	143	102	35340	119	17102	637	79	41	0	0	2181	991	619	312	284	261	351	244	261	80	485	448	247
Bacteria_Cyanobacteria_Cyanobacteriia_Cyanobacteriales_Phormidiaceae_Phormidium IAM M-71	72	33	48	26	0	19	26	32	25	0	0	36	0	49	24	0	0	0	76	67	64	40	29	68	100	105	43	53	81	26	84	96	40	22	46	87	1513	3850	4664	2937	3516	3687	5277	3498	4553	2568	1994	5420	2429
Bacteria_Cyanobacteria_Cyanobacteriia_Cyanobacteriales_Phormidiaceae_Planktothrix NIVA-CYA 15	1278	543	129	221	54	26	828	414	199	170	36	132	1145	414	151	208	41	21	400	797	127	98	23	25	430	250	69	46	148	34	2025	1115	228	147	0	30	1240	2162	661	345	423	410	530	279	259	181	839	878	385
Bacteria_Cyanobacteria_Cyanobacteriia_Cyanobacteriales_Phormidiaceae_Trichocoleus SAG 26.92	259	435	196	255	106	106	263	330	243	155	84	107	214	328	209	199	113	63	133	202	63	49	52	0	124	96	64	73	38	41	142	123	45	45	0	0	25	22	21	15	18	13	15	13	16	0	0	0	0
Bacteria_Cyanobacteria_Cyanobacteriia_Cyanobacteriales_Phormidiaceae_Trichodesmium IMS101	2760	292	241	133	232	323	547	207	143	597	186	248	1925	1268	614	163	133	358	4289	2898	174	178	132	32	4989	697	154	110	628	0	3046	2476	241	230	69	38	4005	547	435	387	305	271	531	275	349	111	403	363	283
Bacteria_Cyanobacteria_Cyanobacteriia_Cyanobacteriales_Phormidiaceae_Tychonema CCAP 1459-11B	91	70	48	39	37	27	47	35	35	60	60	0	63	71	49	111	0	31	252	191	158	114	89	92	292	183	84	113	91	0	371	126	102	51	0	0	396	238	139	133	128	80	141	121	118	33	132	155	115
Bacteria_Cyanobacteria_Cyanobacteriia_Cyanobacteriales_Phormidiaceae_uncultured	51	54	23	43	57	47	87	28	34	38	90	67	594	290	41	58	52	30	201	3245	124	121	146	55	137	366	167	137	117	47	652	56	53	79	109	68	297	119	71	43	74	86	99	56	94	31	131	68	54
Bacteria_Cyanobacteria_Cyanobacteriia_Cyanobacteriales_Prochloraceae_Prochloron P1-Palau	105	92	18	16	0	0	66	52	30	0	0	0	48	66	28	34	16	0	123	53	40	47	56	41	133	38	51	19	103	0	409	50	22	0	0	0	423	89	79	100	83	77	176	97	176	10	130	70	65
Bacteria_Cyanobacteria_Cyanobacteriia_Cyanobacteriales_Rubidibacteraceae_Dactylococcopsis PCC-8305	245	294	267	352	366	229	212	300	242	247	304	244	220	232	352	264	220	587	386	320	159	168	113	97	566	289	178	150	217	62	503	284	123	101	60	83	561	468	492	336	397	377	534	408	394	153	341	395	303
Bacteria_Cyanobacteria_Cyanobacteriia_Cyanobacteriales_Rubidibacteraceae_Rubidibacter KORDI 51-2	114	92	42	41	34	37	115	68	49	0	20	29	79	70	0	23	0	18	619	349	132	76	26	28	836	311	209	97	264	32	1097	327	35	15	22	0	63	36	16	16	21	27	47	35	20	0	18	32	18
Bacteria_Cyanobacteria_Cyanobacteriia_Cyanobacteriales_Rubidibacteraceae_uncultured	18	0	0	0	0	0	0	0	0	0	0	0	0	0	0	0	0	0	53	63	38	0	0	0	39	29	20	0	103	0	27	47	24	0	0	0	25	46	16	11	14	0	0	0	0	0	20	24	12
Bacteria_Cyanobacteria_Cyanobacteriia_Cyanobacteriales_Xenococcaceae_Chroococcidiopsis PCC-6712	159	85	122	20	0	0	54	56	0	0	0	0	109	65	81	0	56	0	95	90	66	0	0	0	398	168	56	63	50	0	230	59	0	0	0	0	358	505	287	222	273	203	153	81	100	46	310	408	243
Bacteria_Cyanobacteria_Cyanobacteriia_Cyanobacteriales_Xenococcaceae_Chroococcopsis	0	0	0	0	0	0	0	0	0	0	0	0	0	0	0	0	0	0	0	0	0	0	0	0	0	0	0	0	0	0	0	0	0	0	0	0	13	83	41	20	0	0	0	0	0	0	50	18	0
Bacteria_Cyanobacteria_Cyanobacteriia_Cyanobacteriales_Xenococcaceae_Foliisarcina	0	0	0	0	0	0	30	0	0	0	0	0	0	0	0	0	0	0	568	865	1090	284	26	0	602	803	478	342	132	0	520	674	226	0	0	0	0	0	0	0	0	0	0	0	0	0	0	0	0
Bacteria_Cyanobacteria_Cyanobacteriia_Cyanobacteriales_Xenococcaceae_Myxosarcina GI1	0	26	0	0	0	0	0	20	0	0	0	0	0	34	0	0	0	0	0	0	0	0	0	0	29	0	0	0	0	0	0	0	0	0	0	0	0	0	0	0	138	0	0	0	0	0	0	0	0
Bacteria_Cyanobacteria_Cyanobacteriia_Cyanobacteriales_Xenococcaceae_Pleurocapsa PCC-7319	1761	1834	382	399	113	19	2233	1262	429	368	29	0	1456	1198	836	686	114	113	10788	16111	9340	9600	642	984	14578	16055	7776	8945	4182	564	6582	15952	4490	642	250	140	486	1024	870	345	465	487	474	149	141	53	649	750	534
Bacteria_Cyanobacteria_Cyanobacteriia_Cyanobacteriales_Xenococcaceae_Stanieria PCC-7437	117	55	0	0	0	0	33	0	0	0	0	0	48	35	0	0	0	0	216	79	65	0	0	0	239	87	108	0	137	0	374	59	0	0	0	0	0	25	0	0	0	0	0	0	0	0	20	37	0
Bacteria_Cyanobacteria_Cyanobacteriia_Cyanobacteriales_Xenococcaceae_Xenococcus CRM	100	67	45	49	38	0	86	68	25	28	28	0	53	71	30	49	19	20	840	484	202	115	56	71	746	382	215	127	476	48	1399	446	74	38	0	0	95	144	132	105	126	76	90	85	93	29	81	180	81
Bacteria_Cyanobacteria_Cyanobacteriia_Cyanobacteriales_Xenococcaceae_Xenococcus PCC-7305	903	965	60	1640	0	0	456	1746	138	80	0	0	756	400	70	49	0	0	278	130	73	79	121	39	418	176	26	591	32	0	860	107	94	29	30	0	17	120	118	60	57	34	58	25	15	0	34	195	34
Bacteria_Cyanobacteria_Cyanobacteriia_Cyanobacteriales_Xenococcaceae_uncultured	458	486	151	156	183	103	384	225	128	90	88	68	457	255	251	132	72	103	286	329	184	160	31	0	389	264	223	166	178	48	501	296	111	75	0	0	104	200	112	62	84	77	68	34	29	14	191	160	60
Bacteria_Cyanobacteria_Cyanobacteriia_Eurycoccales_Eurycoccales Incertae Sedis_Candidatus Gloeomargarita	98	96	30	28	150	116	100	104	48	72	104	100	89	73	43	62	167	121	61	53	57	49	49	49	97	76	76	67	51	36	71	48	40	36	45	72	63	103	55	15	50	61	68	53	68	48	95	79	45
Bacteria_Cyanobacteria_Cyanobacteriia_Eurycoccales_Eurycoccales Incertae Sedis_Synechococcus PCC-7336	171	52	0	0	0	0	27	32	17	0	0	0	222	49	17	44	0	0	104	54	20	22	122	208	111	65	32	18	171	132	288	53	28	0	338	106	79	138	132	77	38	35	26	14	16	0	85	105	85
Bacteria_Cyanobacteria_Cyanobacteriia_Eurycoccales_Leptococcaceae_Leptococcus JA-3-3Ab	0	39	0	0	0	0	39	0	0	0	0	0	0	21	0	0	0	0	44	0	50	62	70	87	91	0	70	114	32	0	130	0	59	48	83	47	0	39	20	21	29	33	30	16	33	26	12	23	17
Bacteria_Cyanobacteria_Cyanobacteriia_Gloeobacterales_Gloeobacteraceae_Gloeobacter PCC-7421	378	702	1708	2226	923	221	532	687	1979	2120	488	120	240	474	1587	1724	568	212	104	125	39	24	0	0	191	135	49	39	25	22	78	67	18	0	28	0	72	828	993	467	687	1385	2008	2432	1297	263	297	669	355
Bacteria_Cyanobacteria_Cyanobacteriia_Leptolyngbyales_Leptolyngbyaceae_Alkalinema CENA528	30	0	0	0	0	0	0	0	0	0	0	0	0	0	0	0	0	0	0	0	0	0	0	0	0	0	0	0	0	0	0	0	0	0	0	0	0	0	0	0	0	0	0	0	0	0	0	0	0
Bacteria_Cyanobacteria_Cyanobacteriia_Leptolyngbyales_Leptolyngbyaceae_Arthronema SAG 12.89	0	0	0	30	31	0	21	0	56	62	0	0	0	0	0	0	29	0	53	61	30	53	179	74	61	36	70	43	55	142	81	0	140	275	146	83	11	62	87	32	30	47	13	0	0	0	23	53	40
Bacteria_Cyanobacteria_Cyanobacteriia_Leptolyngbyales_Leptolyngbyaceae_BMM02	0	0	0	0	0	0	0	0	0	0	0	0	34	0	29	0	0	0	131	53	0	0	0	0	76	0	0	0	0	0	79	90	0	0	0	0	0	12	19	84	0	0	0	0	0	0	0	17	12
Bacteria_Cyanobacteria_Cyanobacteriia_Leptolyngbyales_Leptolyngbyaceae_CENA359	44	0	21	0	0	0	22	20	21	0	0	27	30	0	0	0	0	0	42	44	25	0	0	0	28	36	20	0	34	0	34	49	21	19	0	0	116	66	54	39	30	60	32	23	28	12	74	69	45
Bacteria_Cyanobacteria_Cyanobacteriia_Leptolyngbyales_Leptolyngbyaceae_CENA518	0	0	0	0	0	0	0	0	0	0	0	0	0	0	0	0	0	0	0	0	0	0	0	0	0	0	0	0	0	0	0	0	0	0	0	0	60	0	0	0	0	0	0	0	0	0	14	0	16
Bacteria_Cyanobacteria_Cyanobacteriia_Leptolyngbyales_Leptolyngbyaceae_Calenema	0	65	30	0	34	0	23	19	63	29	37	0	24	28	29	30	0	0	75	66	0	32	22	0	57	73	24	0	0	0	75	107	23	23	50	0	119	117	92	86	73	125	126	101	122	46	80	142	73
Bacteria_Cyanobacteria_Cyanobacteriia_Leptolyngbyales_Leptolyngbyaceae_Calothrix KVSF5	36	35	28	106	0	0	30	41	96	82	0	0	23	31	102	106	39	0	75	0	42	27	46	54	90	0	24	0	43	33	122	0	33	0	223	81	99	160	159	99	82	81	96	71	81	45	108	138	115
Bacteria_Cyanobacteria_Cyanobacteriia_Leptolyngbyales_Leptolyngbyaceae_Chamaesiphon PCC-7430	72	34	0	0	0	0	0	0	0	0	0	0	43	0	0	0	0	0	159	119	52	0	0	0	137	98	41	40	38	0	300	64	0	0	0	0	58	49	49	41	32	26	20	17	41	0	44	34	26
Bacteria_Cyanobacteria_Cyanobacteriia_Leptolyngbyales_Leptolyngbyaceae_EcFYyy-200	0	31	0	0	0	0	0	0	0	0	0	0	0	0	0	0	0	0	0	0	0	0	0	0	0	0	0	0	0	0	0	0	0	0	0	0	21	0	18	0	16	13	21	0	0	0	0	0	0
Bacteria_Cyanobacteria_Cyanobacteriia_Leptolyngbyales_Leptolyngbyaceae_Fr127	0	0	0	0	0	0	0	0	0	0	0	0	0	0	0	0	0	0	0	0	0	0	0	0	34	0	0	0	0	0	0	0	0	0	0	0	0	0	12	0	0	0	11	0	12	13	0	0	0
Bacteria_Cyanobacteria_Cyanobacteriia_Leptolyngbyales_Leptolyngbyaceae_Geitlerinema PCC-8501	40	0	0	41	0	0	0	0	0	0	0	0	0	27	0	0	0	0	67	43	0	0	0	0	48	0	0	0	0	0	84	36	0	0	0	0	33	51	39	36	29	25	31	15	20	0	27	47	0
Bacteria_Cyanobacteria_Cyanobacteriia_Leptolyngbyales_Leptolyngbyaceae_Greenland-10	0	0	0	0	0	0	0	0	0	0	0	0	0	0	0	0	0	0	0	0	0	0	0	0	0	0	0	0	0	0	0	0	0	0	0	0	0	0	0	27	22	0	0	0	0	0	0	0	0
Bacteria_Cyanobacteria_Cyanobacteriia_Leptolyngbyales_Leptolyngbyaceae_HAVOmat113	121	67	0	0	0	0	157	45	0	0	0	0	151	52	0	0	0	0	0	0	0	0	0	0	23	0	0	0	0	0	32	0	0	0	0	0	0	23	25	15	19	15	27	0	16	0	19	14	0
Bacteria_Cyanobacteria_Cyanobacteriia_Leptolyngbyales_Leptolyngbyaceae_JSC-12	0	0	0	0	0	0	0	0	0	0	0	0	0	0	0	0	0	0	172	0	43	24	0	39	93	25	0	0	0	33	253	0	0	0	36	71	26	28	16	31	29	17	53	24	33	0	12	25	18
Bacteria_Cyanobacteria_Cyanobacteriia_Leptolyngbyales_Leptolyngbyaceae_LB3-76	103	0	0	0	58	46	30	32	0	62	80	67	49	0	0	0	84	28	120	113	46	25	29	30	127	52	49	0	46	0	132	63	29	0	56	0	48	363	384	78	61	76	42	26	36	57	198	278	155
Bacteria_Cyanobacteria_Cyanobacteriia_Leptolyngbyales_Leptolyngbyaceae_Leptolyngbya ANT.L52.2	57	64	83	164	194	138	35	103	155	204	286	132	56	107	80	141	408	234	76	54	88	77	65	0	120	54	64	72	83	58	144	38	157	144	90	0	210	259	153	90	161	167	180	147	144	60	121	169	129
Bacteria_Cyanobacteria_Cyanobacteriia_Leptolyngbyales_Leptolyngbyaceae_Leptolyngbya ANT.L67.1	89	83	0	36	0	0	99	35	0	0	0	0	113	49	37	0	0	0	343	289	67	101	221	0	197	220	41	53	53	0	463	206	40	0	0	0	145	187	161	93	159	127	215	200	214	113	122	174	81
Bacteria_Cyanobacteria_Cyanobacteriia_Leptolyngbyales_Leptolyngbyaceae_Leptolyngbya BN43	0	51	110	80	0	0	30	51	44	38	0	0	0	44	55	63	0	0	0	0	0	0	0	0	0	0	0	0	0	0	0	0	0	0	0	0	24	20	0	0	0	0	0	0	0	0	18	16	18
Bacteria_Cyanobacteria_Cyanobacteriia_Leptolyngbyales_Leptolyngbyaceae_Leptolyngbya Es-Yyy1000	0	0	0	0	0	0	0	0	0	0	0	0	0	0	0	0	0	0	0	33	0	0	0	0	33	0	0	0	0	0	29	0	0	0	0	0	48	31	41	44	28	25	73	43	26	0	27	20	36
Bacteria_Cyanobacteria_Cyanobacteriia_Leptolyngbyales_Leptolyngbyaceae_Leptolyngbya FYG	0	0	0	0	0	0	0	0	0	0	0	0	0	0	0	0	0	0	0	0	0	0	0	0	0	0	0	0	0	0	0	0	0	0	0	0	21	0	0	0	0	0	0	0	0	0	13	0	0
Bacteria_Cyanobacteria_Cyanobacteriia_Leptolyngbyales_Leptolyngbyaceae_Leptolyngbya PCC-6306	238	190	83	90	17	0	441	90	53	31	0	20	192	262	61	64	0	0	400	282	82	54	26	28	470	292	85	53	48	0	600	378	50	0	35	0	58	77	59	63	78	87	69	27	32	29	73	108	63
Bacteria_Cyanobacteria_Cyanobacteriia_Leptolyngbyales_Leptolyngbyaceae_Leptolyngbya RV74	27	0	0	0	0	0	21	0	0	0	0	0	0	43	0	0	0	0	77	50	27	0	0	0	68	60	28	0	0	0	86	30	0	0	0	0	0	0	0	0	0	12	0	0	0	0	12	0	0
Bacteria_Cyanobacteria_Cyanobacteriia_Leptolyngbyales_Leptolyngbyaceae_Leptolyngbya SAG 2411	0	0	0	0	0	0	0	0	0	0	0	0	0	0	0	0	0	0	0	0	0	0	0	0	0	0	0	0	0	0	0	0	0	0	0	0	0	0	0	0	0	0	0	0	0	0	0	0	0
Bacteria_Cyanobacteria_Cyanobacteriia_Leptolyngbyales_Leptolyngbyaceae_Leptolyngbya VRUC 135	645	667	464	523	150	209	551	445	396	356	267	224	816	642	468	3277	334	250	862	1066	908	516	459	167	1087	645	356	256	435	153	1031	650	344	245	321	683	183026	118657	93790	90764	81434	74893	113114	62327	63562	34161	87931	96818	77063
Bacteria_Cyanobacteria_Cyanobacteriia_Leptolyngbyales_Leptolyngbyaceae_Limnolyngbya CHAB4449	127	56	29	28	0	0	64	39	31	27	0	0	148	67	45	54	0	0	0	0	0	0	0	0	0	0	0	0	0	0	30	0	0	0	0	0	111	284	148	43	19	19	23	26	13	0	117	157	43
Bacteria_Cyanobacteria_Cyanobacteriia_Leptolyngbyales_Leptolyngbyaceae_MIZ36	0	0	0	0	0	0	0	0	0	0	0	0	0	0	0	0	0	0	65	0	37	0	0	0	70	0	0	0	0	0	156	24	0	0	0	0	0	0	44	38	96	116	104	575	1228	796	0	13	25
Bacteria_Cyanobacteria_Cyanobacteriia_Leptolyngbyales_Leptolyngbyaceae_MTP1	0	0	0	0	0	0	0	0	0	0	0	0	0	0	0	0	0	0	0	0	0	0	0	0	0	0	0	0	0	0	0	0	0	0	0	0	24	0	0	0	0	0	0	0	0	0	0	0	0
Bacteria_Cyanobacteria_Cyanobacteriia_Leptolyngbyales_Leptolyngbyaceae_Oscillatoria SAG 1459-8	0	0	0	0	0	0	0	24	0	0	0	0	0	0	0	0	0	0	0	0	0	0	0	0	0	0	0	0	0	0	0	0	0	0	0	0	14	13	22	0	19	29	54	40	25	0	0	21	13
Bacteria_Cyanobacteria_Cyanobacteriia_Leptolyngbyales_Leptolyngbyaceae_Pantalinema	0	0	0	0	0	0	0	0	0	0	0	0	0	0	0	0	0	0	0	0	0	0	0	0	0	0	0	0	0	0	0	0	0	0	0	0	28	33	0	22	17	14	26	13	28	0	23	35	0
Bacteria_Cyanobacteria_Cyanobacteriia_Leptolyngbyales_Leptolyngbyaceae_Phormidesmis ANT.L52.6	61	39	0	0	0	0	39	0	0	0	0	0	48	33	0	0	0	0	76	31	27	41	0	0	69	43	0	0	25	0	83	51	0	0	0	0	148	219	189	117	165	183	245	213	227	71	155	228	136
Bacteria_Cyanobacteria_Cyanobacteriia_Leptolyngbyales_Leptolyngbyaceae_Phormidium CYN64	44	0	0	0	0	0	0	0	0	0	0	0	37	0	0	0	0	0	0	0	0	0	0	0	0	0	0	0	0	0	0	0	0	0	0	0	76	96	93	49	76	75	95	66	63	34	67	95	58
Bacteria_Cyanobacteria_Cyanobacteriia_Leptolyngbyales_Leptolyngbyaceae_Phormidium SAG 37.90	63	52	0	0	0	0	82	0	0	0	0	0	72	0	0	0	0	0	786	68	243	152	557	73	505	80	0	0	0	0	1194	37	0	0	0	195	186	176	125	83	100	204	163	141	139	63	163	156	102
Bacteria_Cyanobacteria_Cyanobacteriia_Leptolyngbyales_Leptolyngbyaceae_RD011	0	0	0	0	0	0	0	0	0	0	0	0	0	0	0	0	0	0	0	0	0	0	0	0	0	0	0	0	0	0	0	0	0	0	0	0	27	20	14	0	0	0	15	0	0	0	14	0	0
Bacteria_Cyanobacteria_Cyanobacteriia_Leptolyngbyales_Leptolyngbyaceae_YB-42	0	0	0	0	0	0	0	0	0	0	0	0	0	0	0	0	0	0	0	0	0	0	0	0	0	0	0	0	0	0	0	0	0	0	0	0	40	24	21	12	0	17	22	20	20	0	15	28	17
Bacteria_Cyanobacteria_Cyanobacteriia_Leptolyngbyales_Leptolyngbyaceae_uncultured	2240	1708	1201	1117	931	1111	1429	1371	890	891	956	1095	1621	1382	1206	1132	880	815	10438	9957	4141	3284	1559	1366	13216	9632	2855	3194	2792	1614	10112	13847	4132	1060	1172	1228	1670	2202	2140	1661	1862	1940	2283	1798	2079	1024	1453	2169	1453
Bacteria_Cyanobacteria_Cyanobacteriia_Limnotrichales_Limnotrichaceae_Limnothrix	193	65	21	43	0	0	117	50	25	24	22	26	177	141	34	30	0	0	1521	412	1139	787	600	54	1225	324	106	46	91	35	5207	235	103	47	44	0	203	300	225	183	240	234	352	219	390	88	176	268	210
Bacteria_Cyanobacteria_Cyanobacteriia_Neosynechococcales_Neosynechococcaceae_Neosynechococcus	0	0	0	0	0	0	0	0	0	0	0	0	0	0	0	0	0	0	0	0	0	0	0	0	221	0	0	0	0	0	0	0	0	0	0	0	0	0	0	0	0	0	0	0	0	0	0	0	0
Bacteria_Cyanobacteria_Cyanobacteriia_Oxyphotobacteria Incertae Sedis_Unknown Family44_Leptolyngbya EcFYyyy-00	33	0	27	0	0	0	0	22	0	0	0	0	0	0	0	107	0	0	63	0	0	29	0	0	36	0	31	0	0	0	69	35	42	0	0	0	30	32	21	28	41	40	39	15	15	0	34	28	23
Bacteria_Cyanobacteria_Cyanobacteriia_Oxyphotobacteria Incertae Sedis_Unknown Family43_uncultured	87	0	0	0	0	0	29	0	0	0	0	0	31	0	0	0	0	0	0	0	0	0	0	0	53	0	0	0	0	0	89	0	0	0	0	0	71	73	52	23	47	32	37	23	24	0	55	64	27
Bacteria_Cyanobacteria_Cyanobacteriia_Phormidesmiales_Nodosilineaceae_Halomicronema	0	0	0	0	0	0	0	0	0	0	0	0	0	0	0	0	0	74	0	0	0	0	0	0	0	0	0	0	0	0	0	0	0	0	0	0	0	0	0	0	0	0	0	0	0	0	0	0	0
Bacteria_Cyanobacteria_Cyanobacteriia_Phormidesmiales_Nodosilineaceae_Halomicronema TFEP1	223	96	0	0	0	0	167	53	0	0	0	0	195	86	0	0	0	0	1529	228	317	294	77	95	1629	235	102	27	81	0	2927	106	51	31	0	158	4974	142	37	66	29	31	60	17	26	20	847	53	106
Bacteria_Cyanobacteria_Cyanobacteriia_Phormidesmiales_Nodosilineaceae_Leptolyngbya PCC-6406	121	49	0	0	74	23	58	27	0	0	63	36	66	26	0	0	78	0	754	219	321	319	191	97	739	168	193	179	101	149	1318	132	357	256	56	33	2681	83	26	50	14	26	30	0	0	0	487	37	67
Bacteria_Cyanobacteria_Cyanobacteriia_Phormidesmiales_Nodosilineaceae_MBIC10086	168	52	26	0	0	0	114	25	0	0	0	0	130	39	0	0	0	0	78	0	42	72	96	0	121	37	0	0	0	0	242	0	0	0	0	0	37	12	0	0	0	0	0	0	0	0	0	0	0
Bacteria_Cyanobacteria_Cyanobacteriia_Phormidesmiales_Nodosilineaceae_Nodosilinea PCC-7104	2379	979	67	76	35	28	1250	586	126	85	23	0	1974	776	122	67	42	32	4561	2016	917	701	188	250	5881	1920	748	365	1949	684	9003	2070	315	79	0	177	9590	6711	4896	3841	6318	4214	3698	1734	1937	1222	4845	6289	3016
Bacteria_Cyanobacteria_Cyanobacteriia_Phormidesmiales_Nodosilineaceae_uncultured	356	252	116	123	65	34	264	176	161	124	68	43	361	210	123	156	36	32	1048	497	298	256	64	23	1125	470	183	122	116	41	1621	292	148	43	0	46	1923	381	253	209	238	237	295	198	231	125	652	310	215
Bacteria_Cyanobacteria_Cyanobacteriia_Phormidesmiales_Phormidesmiaceae_Acrophormium PCC-7375	2984	797	45	60	27	0	1625	1197	91	76	0	0	3749	749	82	71	20	0	784	172	155	249	0	0	1539	180	85	44	53	20	1851	142	47	22	0	0	1194	428	298	297	322	339	433	361	307	99	435	382	266
Bacteria_Cyanobacteria_Cyanobacteriia_Phormidesmiales_Phormidesmiaceae_Phormidesmis ANT.LACV5.1	1403	434	52	66	40	21	517	434	60	41	44	37	1112	489	63	89	33	23	633	337	295	203	248	74	821	337	198	218	114	441	1207	313	186	94	46	39	575	500	353	235	266	278	339	271	264	122	358	368	225
Bacteria_Cyanobacteria_Cyanobacteriia_Phormidesmiales_Phormidesmiaceae_Phormidium MBIC10002	93	62	0	0	0	22	48	28	0	0	31	0	81	0	0	0	0	23	0	0	0	0	0	0	113	0	0	0	0	0	97	0	0	0	0	0	0	51	41	63	52	60	56	25	22	27	22	58	71
Bacteria_Cyanobacteria_Cyanobacteriia_Phormidesmiales_Phormidesmiaceae_Phormidium MBIC10003	399	350	41	55	28	24	291	215	78	139	23	0	303	237	95	50	17	19	1019	500	163	237	224	113	1478	425	231	99	369	99	2335	363	89	112	188	75	1221	456	362	577	197	194	268	229	181	82	422	375	244
Bacteria_Cyanobacteria_Cyanobacteriia_Phormidesmiales_Phormidesmiaceae_uncultured	79	54	17	22	24	30	41	42	36	27	29	25	74	54	33	38	29	31	110	67	59	40	0	0	189	55	22	20	23	18	165	69	0	0	22	0	289	192	149	97	134	173	176	182	135	62	184	186	104
Bacteria_Cyanobacteria_Cyanobacteriia_Pseudanabaenales_Pseudanabaenaceae_Pseudanabaena PCC-6802	0	0	0	0	0	0	0	0	0	0	0	0	0	0	0	0	0	0	0	0	0	0	0	0	0	0	0	0	0	0	0	0	0	0	0	0	44	141	222	71	98	62	49	14	56	20	57	159	304
Bacteria_Cyanobacteria_Cyanobacteriia_Pseudanabaenales_Pseudanabaenaceae_Pseudanabaena PCC-7367	48	67	28	29	0	0	63	57	64	35	0	0	56	106	26	30	0	0	82	27	45	0	0	0	197	30	0	0	0	0	111	28	0	0	0	0	64	207	227	96	168	238	201	336	196	52	96	198	183
Bacteria_Cyanobacteria_Cyanobacteriia_Pseudanabaenales_Pseudanabaenaceae_Pseudanabaena PCC-7429	256	232	139	121	96	54	189	168	118	80	100	29	191	202	126	148	101	38	425	359	163	130	33	0	350	246	135	145	65	0	354	210	121	40	0	0	3157	415	257	581	184	313	388	110	189	98	563	262	199
Bacteria_Cyanobacteria_Cyanobacteriia_Pseudanabaenales_Pseudanabaenaceae_Synechococcus PCC-7502	402	435	36	31	0	0	305	231	32	26	22	0	299	290	28	30	20	21	137	119	68	88	54	27	133	93	86	80	39	38	222	146	73	54	0	0	268	253	262	130	215	270	261	247	197	109	214	278	166
Bacteria_Cyanobacteria_Cyanobacteriia_Pseudanabaenales_Pseudanabaenaceae_uncultured	145	116	114	112	109	87	117	111	98	116	92	57	85	108	114	86	85	68	230	464	425	716	105	46	463	376	843	400	395	184	320	312	286	400	69	0	627	405	505	357	316	285	261	121	182	103	394	353	498
Bacteria_Cyanobacteria_Cyanobacteriia_Synechococcales_Cyanobiaceae_Cyanobium PCC-6307	44746	33907	28901	26769	1191	710	34443	27237	20612	12608	1028	948	42455	34619	23952	16093	1609	833	239865	188816	73592	46799	12240	5513	296308	188735	60426	46024	39626	7391	216595	250022	49785	7483	607	1591	256161	503225	437445	314016	417222	467605	581620	374807	412159	190111	275120	555749	273900
Bacteria_Cyanobacteria_Cyanobacteriia_Synechococcales_Cyanobiaceae_Prochlorococcus MIT9313	2203	1919	988	947	320	168	1718	1300	837	566	201	186	1885	1858	925	858	428	186	6554	5251	1985	1199	470	422	7520	4552	1660	1177	1313	284	6409	5084	1154	430	223	432	4518	8952	8462	5316	6749	8512	9010	8185	6696	3742	4946	9565	5215
Bacteria_Cyanobacteria_Cyanobacteriia_Synechococcales_Cyanobiaceae_Synechococcus CC9902	50600	48540	3722	3787	1342	2091	48590	33948	6309	3860	3688	1725	43243	49694	5298	2811	1230	2030	70073	21166	17875	15132	3982	1727	90190	24860	16021	7188	11395	2033	121451	20792	12525	5215	276	567	5134	10431	10125	6902	9156	11725	13994	13570	10856	6501	5798	11222	6359
Bacteria_Cyanobacteria_Cyanobacteriia_Synechococcales_Cyanobiaceae_Synechococcus MBIC10613	2301	1794	1821	1931	34	0	1536	1317	1198	774	0	0	1929	1659	1463	1127	68	0	29143	27261	7234	4371	921	615	34049	22879	6498	4001	4346	864	26629	28558	3700	508	0	118	495	1721	1634	1416	2082	2409	2208	907	667	319	866	2105	1089
Bacteria_Cyanobacteria_Cyanobacteriia_Synechococcales_Cyanobiaceae_[Synechococcus] spongiarum group	417	345	216	185	33	29	302	251	151	101	60	0	361	329	144	124	55	27	2123	2021	813	465	117	48	2644	2173	643	504	447	53	2296	3030	454	80	0	0	107	294	272	199	330	479	541	431	441	223	151	318	147
Bacteria_Cyanobacteria_Cyanobacteriia_Synechococcales_Prochlorotrichaceae_Prochlorothrix PCC-9006	363	102	0	0	0	0	275	91	0	0	0	0	166	121	0	0	0	0	351	60	260	148	73	0	350	120	38	71	50	0	914	37	82	81	0	0	55	110	37	28	34	38	49	27	35	17	56	58	25
Bacteria_Cyanobacteria_Cyanobacteriia_Synechococcales_Synechococcaceae_Microcystis NIES42	0	0	0	0	0	0	0	0	0	0	0	0	0	0	0	0	0	0	0	0	0	0	0	0	17	0	0	0	0	0	0	0	0	0	0	0	38	67	51	32	42	37	43	19	23	12	43	55	28
Bacteria_Cyanobacteria_Cyanobacteriia_Synechococcales_Synechococcaceae_Synechococcus PCC-7942	0	0	0	0	129	30	22	0	0	0	81	43	0	0	0	0	57	36	140	218	172	144	0	0	105	145	190	164	78	0	148	106	42	196	0	0	36	279	489	156	79	26	28	37	34	26	88	369	468
Bacteria_Cyanobacteria_Cyanobacteriia_Synechococcales_Synechococcaceae_uncultured	0	0	0	0	0	0	0	0	0	0	0	0	0	0	0	0	0	0	0	0	0	0	0	0	0	0	0	0	0	0	0	0	0	0	0	0	0	0	10	0	0	13	14	0	11	0	0	0	0
Bacteria_Cyanobacteria_Cyanobacteriia_Synechococcales_Synechococcales Incertae Sedis_Schizothrix LEGE 07164	1721	585	0	0	0	0	635	444	18	27	0	28	1348	499	23	18	0	0	428	127	202	146	91	23	974	232	138	85	78	25	1335	70	94	86	0	48	2838	513	370	316	1470	2870	1992	504	453	165	699	417	328
Bacteria_Cyanobacteria_Cyanobacteriia_Thermosynechococcales_Acaryochloridaceae_Acaryochloris MBIC11017	406	233	75	137	140	20	209	130	96	170	24	0	356	277	124	148	143	24	78	106	84	83	19	0	198	112	69	96	59	0	218	47	51	87	0	0	275	221	101	44	50	41	62	36	36	0	124	125	75
Bacteria_Cyanobacteria_Cyanobacteriia_Thermosynechococcales_Thermosynechococcaceae_Cyanothece PCC 7425	52	47	44	50	139	59	40	41	36	69	94	88	37	60	42	62	111	44	178	116	61	61	85	43	184	155	66	64	80	70	173	78	65	41	97	74	1160	1811	785	260	102	93	67	32	44	20	737	1215	306
Bacteria_Cyanobacteria_Cyanobacteriia_Thermosynechococcales_Thermosynechococcaceae_Loriellopsis LF-B5	0	0	0	0	0	0	0	0	0	0	0	0	0	0	0	0	0	0	92	0	0	0	0	0	64	0	0	0	0	0	113	0	0	0	0	0	133	0	0	0	0	0	0	0	0	0	33	0	0
Bacteria_Cyanobacteria_Cyanobacteriia_Thermosynechococcales_Thermosynechococcaceae_Synechococcus	29	0	0	0	0	17	0	0	0	0	0	0	0	0	0	0	0	0	0	0	0	0	0	0	0	0	0	0	0	0	0	0	0	0	0	0	0	0	0	0	0	0	0	0	0	0	0	0	0
Bacteria_Cyanobacteria_Cyanobacteriia_Thermosynechococcales_Thermosynechococcaceae_Synechococcus IR11	0	0	0	0	0	0	23	0	0	0	0	0	26	24	0	0	0	0	0	0	28	0	0	0	49	0	0	0	0	0	104	0	0	0	0	0	112	178	112	124	105	83	212	93	99	24	128	131	127
Bacteria_Cyanobacteria_Cyanobacteriia_Thermosynechococcales_Thermosynechococcaceae_Synechococcus PCC-6312	24	0	0	0	0	0	0	0	0	0	0	0	0	0	0	0	0	0	0	0	0	0	0	0	0	0	0	0	0	0	18	0	0	0	0	0	0	17	0	14	0	10	0	0	0	0	0	10	0
Bacteria_Cyanobacteria_Cyanobacteriia_Thermosynechococcales_Thermosynechococcaceae_Thermosynechococcus BP-1	18	0	0	0	0	0	18	0	0	0	0	0	0	0	0	0	0	0	0	44	55	31	0	0	41	27	42	41	0	0	31	39	38	25	0	0	41	31	41	24	28	25	29	49	40	14	22	47	22
Bacteria_Cyanobacteria_Cyanobacteriia_Thermosynechococcales_Thermosynechococcaceae_uncultured	0	0	0	0	18	39	0	0	0	0	25	35	0	0	0	42	21	18	37	25	0	0	0	0	33	26	0	0	20	0	43	20	0	0	0	0	45	42	45	44	60	33	79	46	46	13	35	23	34
Bacteria_Cyanobacteria_Vampirivibrionia_Obscuribacterales_Obscuribacteraceae_Candidatus Obscuribacter	1281	1661	0	0	0	0	1156	1168	0	0	0	0	1088	1529	0	0	0	0	917	0	0	0	0	0	1378	0	0	0	0	0	926	0	0	0	0	0	573	1671	1406	566	677	645	560	298	355	0	921	1213	859
Bacteria_Cyanobacteria_Vampirivibrionia_Vampirovibrionales_Vampirovibrionaceae_Vampirovibrio	1024	1280	1516	1710	1042	583	1030	1102	1514	1840	1047	659	893	1215	1378	2268	822	762	1154	973	1068	1087	1603	597	1260	889	1015	1080	767	648	1438	676	964	1121	1455	1388	1812	1028	1439	646	796	661	567	492	513	322	724	911	775
Bacteria_Deferribacterota_Deferribacteres_Deferribacterales_Deferribacteraceae_Calditerrivibrio	254	298	59	90	51	39	200	163	112	68	50	131	180	268	141	96	0	30	367	179	108	52	89	0	90	101	75	65	47	0	149	185	73	49	104	57	0	24	29	12	0	13	0	0	0	0	17	30	14
Bacteria_Deferribacterota_Deferribacteres_Deferribacterales_Deferribacteraceae_Deferribacter	40	48	63	93	40	0	35	46	51	60	37	0	43	42	63	49	38	0	171	136	80	83	37	24	282	126	178	127	53	0	217	107	58	59	45	26	21	23	36	13	29	18	14	16	17	11	26	26	27
Bacteria_Deferribacterota_Deferribacteres_Deferribacterales_Deferribacteraceae_Denitrovibrio	37	46	39	69	46	0	25	40	75	66	0	0	24	37	79	80	73	27	1132	338	991	908	1229	284	1438	389	273	320	680	148	4274	142	382	381	719	344	562	96	145	47	58	70	53	65	78	91	130	91	55
Bacteria_Deferribacterota_Deferribacteres_Deferribacterales_Deferribacteraceae_Flexistipes	0	0	0	0	0	0	15	0	15	0	0	0	0	0	0	0	0	0	0	0	0	0	0	0	0	0	0	0	0	0	0	0	0	0	0	0	0	0	0	0	13	0	0	0	0	0	0	0	0
Bacteria_Deferribacterota_Deferribacteres_Deferribacterales_Deferribacteraceae_Geovibrio	353	266	42	72	34	25	291	167	69	51	61	36	319	236	77	73	51	32	1071	210	726	573	291	117	232	64	43	48	281	51	3322	51	45	24	27	18	25	58	84	63	88	44	62	35	47	63	34	84	53
Bacteria_Deferribacterota_Deferribacteres_Deferribacterales_Deferribacteraceae_Mucispirillum	913	826	105	172	103	50	848	667	271	99	151	59	716	721	243	230	106	109	333	233	321	250	255	279	315	165	178	194	218	59	570	134	248	247	82	122	75	146	126	117	101	125	142	241	264	95	114	93	92
Bacteria_Deferribacterota_Deferribacteres_Deferribacterales_Deferribacteraceae_Seleniivibrio	0	22	19	39	38	392	0	27	50	37	81	102	0	18	25	30	46	368	17	24	19	0	31	0	16	18	22	19	15	0	0	0	43	29	20	0	49	130	96	61	26	21	22	33	0	0	42	85	42
Bacteria_Deferribacterota_Deferribacteres_Deferribacterales_Deferribacteraceae_uncultured	629	318	254	337	85	83	519	206	381	143	119	93	473	256	255	174	147	103	6444	1277	1976	2016	600	149	4322	3043	349	181	473	119	20984	3939	474	97	41	36	87	68	57	32	31	59	56	246	211	71	66	47	41
Bacteria_Deferrisomatota_Defferrisomatia_Defferrisomatales_Defferrisomataceae_Deferrisoma	44226	103672	123984	164333	147643	37906	74672	105509	144977	149891	132095	28217	41670	111026	116458	115878	155854	36387	14548	18088	12821	10034	4554	4680	34250	20063	17483	13196	10529	7448	12998	9995	12103	10521	2952	2633	20633	15167	12819	4921	7649	7889	6293	1913	1297	1199	12300	11299	9090
Bacteria_Deinococcota_Deinococci_Deinococcales_Deinococcaceae_Deinobacterium	22	0	0	0	0	0	0	0	0	0	0	0	36	0	0	0	0	0	0	0	0	0	0	24	0	0	0	0	0	0	0	0	0	0	23	29	0	0	0	0	0	0	0	0	0	0	0	0	0
Bacteria_Deinococcota_Deinococci_Deinococcales_Deinococcaceae_Deinococcus	835	1049	767	1047	650	442	816	895	881	818	507	464	734	852	815	986	587	438	934	1024	2985	4319	891	665	982	988	3231	3364	1762	593	979	866	3626	7510	824	273	824	666	475	364	312	337	299	237	302	207	657	488	405
Bacteria_Deinococcota_Deinococci_Deinococcales_Deinococcaceae_uncultured	257	391	184	222	100	41	367	358	200	179	155	333	208	365	197	217	64	47	87	70	76	40	0	19	112	46	104	75	71	27	112	38	88	46	0	37	150	125	105	69	208	187	173	113	393	607	120	95	80
Bacteria_Deinococcota_Deinococci_Deinococcales_Trueperaceae_Truepera	10127	8980	1945	2477	1992	860	7848	5904	3094	2314	1613	1039	9168	7686	2972	2290	1359	983	3463	3641	2951	2607	1815	1304	4038	3232	3069	2718	1933	1408	4213	2364	3093	2483	1376	736	3251	8519	9016	5813	6731	7372	6367	13115	20568	18863	5065	8448	6691
Bacteria_Deinococcota_Deinococci_Thermales_Thermaceae_Marinithermus	39	37	16	31	16	0	30	22	27	0	0	0	38	33	19	21	0	0	22	16	0	0	0	0	15	0	0	0	0	0	32	0	0	0	0	0	0	0	0	0	0	0	0	0	0	0	0	0	0
Bacteria_Deinococcota_Deinococci_Thermales_Thermaceae_Meiothermus	685	941	811	997	1384	1113	727	913	923	1017	1484	573	512	847	808	847	1728	1076	245	344	264	288	161	214	227	290	217	283	128	114	154	198	501	291	103	28	347	768	711	453	331	269	171	126	112	106	487	516	493
Bacteria_Deinococcota_Deinococci_Thermales_Thermaceae_Oceanithermus	0	0	0	0	0	0	0	0	0	0	0	0	0	0	0	0	0	0	41	60	0	0	0	0	82	56	0	0	0	0	27	19	0	0	0	0	0	17	14	0	0	0	0	0	0	0	19	11	17
Bacteria_Deinococcota_Deinococci_Thermales_Thermaceae_Rhabdothermus	28	54	98	71	43	21	36	40	54	54	44	35	48	42	64	74	51	0	30	37	29	0	0	0	38	28	0	0	0	0	39	25	19	0	0	0	0	11	15	10	0	0	0	0	0	0	0	13	13
Bacteria_Deinococcota_Deinococci_Thermales_Thermaceae_Thermus	306	259	150	157	159	121	299	218	173	151	145	93	230	208	137	182	151	110	83	117	146	161	273	228	100	86	124	130	160	453	63	62	121	194	221	490	49	147	165	135	131	104	69	39	61	50	94	147	125
Bacteria_Deinococcota_Deinococci_Thermales_Thermaceae_Vulcanithermus	0	24	18	23	0	0	23	0	21	30	0	0	0	23	25	18	0	0	0	0	0	0	0	0	0	0	0	0	0	0	0	0	0	0	0	0	0	0	0	0	0	0	0	0	0	0	0	0	0
Bacteria_Dependentiae_Babeliae_Babeliales_Babeliaceae_Candidatus Babela	10030	13969	11980	16498	33009	31848	10409	13172	16356	22910	31725	24759	8080	12651	14193	16685	40582	41882	0	0	25983	27634	28819	36594	19545	17866	24197	23296	23246	21150	0	15556	21912	29605	25708	22376	0	24056	28406	23226	32325	35005	35821	21939	25331	45374	14138	26609	23355
Bacteria_Desulfobacterota_Desulfarculia_Desulfarculales_Desulfarculaceae_Desulfarculus	263	1088	555	819	97	54	628	1139	775	316	90	57	300	1057	508	366	137	33	535	241	315	304	292	300	742	410	269	150	304	264	646	155	161	268	185	133	987	436	453	397	419	234	222	71	72	106	626	372	476
Bacteria_Desulfobacterota_Desulfarculia_Desulfarculales_Desulfarculaceae_Desulfocarbo	1540	1844	1050	1538	919	644	1466	1574	1494	1037	842	534	1409	1699	1259	1151	1129	610	1646	1755	751	838	769	683	1858	1254	961	631	722	740	1456	1187	665	721	453	514	649	2496	3796	2753	1839	1443	904	479	459	470	1654	2964	3238
Bacteria_Desulfobacterota_Desulfarculia_Desulfarculales_Desulfarculaceae_Dethiosulfatarculus	173	378	302	254	263	53	284	334	275	166	363	34	106	294	314	283	285	100	107	101	90	91	0	0	165	88	78	69	0	0	140	119	85	111	0	0	55	108	242	0	0	0	0	0	0	0	0	0	0
Bacteria_Desulfobacterota_Desulfarculia_Desulfarculales_Desulfarculaceae_uncultured	495	520	398	645	777	899	501	465	671	739	751	1304	461	485	697	1021	1289	733	1781	1880	1118	890	844	870	1369	1521	1402	720	649	1656	1313	1000	1349	2012	1098	481	441	1325	1962	1353	955	600	375	115	117	105	684	1343	1813
Bacteria_Desulfobacterota_Desulfobaccia_Desulfobaccales_Desulfobaccaceae_Desulfobacca	3479	5876	7936	10884	20294	20670	5089	5834	8442	10968	30932	30354	3165	5987	6327	7318	17548	31377	1735	2676	2720	3186	12001	24316	4302	2779	3838	3075	8834	47515	1598	1781	3131	3981	11633	9455	10474	14120	19377	11731	20096	25391	22777	21465	29030	13281	10990	17788	13450
Bacteria_Desulfobacterota_Desulfobacteria_Desulfatiglandales_Desulfatiglandaceae_Desulfatiglans	130380	277871	393543	517785	1016425	734795	192208	285725	463685	660048	985221	665140	104580	248408	404239	437409	1144051	730619	274167	460235	743780	1055551	2476760	3311802	301775	367357	777533	803632	1601808	3422285	283865	327970	887879	1301372	2385541	2262274	1614757	643902	361820	197891	547185	556837	637311	574962	786336	697113	739796	303752	290845
Bacteria_Desulfobacterota_Desulfobacteria_Desulfobacterales_Desulfobacteraceae_Candidatus Desulfamplus	73	61	60	86	0	0	56	61	88	55	0	0	59	81	63	48	0	0	623	293	203	136	32	0	422	234	72	26	72	0	2004	250	88	35	0	0	1558	627	346	300	174	352	98	28	18	12	717	248	638
Bacteria_Desulfobacterota_Desulfobacteria_Desulfobacterales_Desulfobacteraceae_Desulfobacter	18322	28326	47565	65780	7074	3257	19374	26826	55983	63748	6043	2903	15283	33022	38452	47600	8777	3760	18632	11526	7978	6404	2762	1665	14901	6650	4816	3551	4664	2046	21114	6176	3121	3223	1743	1030	32109	29084	26136	28277	11717	17254	7747	2899	2480	1267	26338	19309	35501
Bacteria_Desulfobacterota_Desulfobacteria_Desulfobacterales_Desulfobacteraceae_Desulfobacterium	3604	2925	2197	2647	2723	1458	2733	2528	2902	2694	15163	3368	2764	3480	2198	2423	4490	1481	34100	9394	9973	9042	3191	1480	9726	5648	3461	2504	3220	11992	24288	3927	2305	2098	620	512	320884	90814	82674	360971	14749	6160	7736	7147	4124	3067	114048	45311	52529
Bacteria_Desulfobacterota_Desulfobacteria_Desulfobacterales_Desulfobacteraceae_Desulfobacula	5001	11352	24973	36630	2377	671	6449	11339	31899	39074	2704	946	4008	13730	18373	26395	3729	1252	11422	6420	4800	3765	1059	1105	13722	5949	2881	1138	2922	2539	13319	4413	1482	1139	365	422	175517	68822	19539	10741	6860	4781	2660	1431	633	463	104284	27944	19253
Bacteria_Desulfobacterota_Desulfobacteria_Desulfobacterales_Desulfobacteraceae_Desulfobotulus	370	717	629	731	1007	284	554	672	1000	857	1192	254	334	749	605	787	1384	368	922	631	404	412	61	106	899	676	445	306	235	193	816	401	302	250	32	0	1370	1202	780	237	203	150	115	75	101	107	994	614	380
Bacteria_Desulfobacterota_Desulfobacteria_Desulfobacterales_Desulfobacteraceae_Desulfocella	664	1270	1491	2114	3012	2228	810	1431	1969	2374	2856	1904	507	1152	1596	1841	4698	2328	932	1186	1108	1304	1510	1326	1128	1172	1679	1465	1600	1034	1351	802	1347	1803	1188	891	866	675	874	372	292	245	304	333	339	395	581	946	352
Bacteria_Desulfobacterota_Desulfobacteria_Desulfobacterales_Desulfobacteraceae_Desulfoconvexum	8790	20644	27681	44807	3225	828	13405	22207	53539	30797	4304	834	7614	53184	23764	24588	3687	1695	73400	45362	20181	21917	5903	3017	65934	30277	15738	5968	18112	6542	124518	39770	6609	3997	1724	976	560983	239221	157671	102319	49815	38067	25279	30599	5043	2941	319338	136445	109307
Bacteria_Desulfobacterota_Desulfobacteria_Desulfobacterales_Desulfobacteraceae_Desulfospira	107	299	327	560	32	0	204	307	514	2647	51	0	105	614	560	380	23	0	1266	370	345	480	156	38	1955	698	424	195	419	106	1228	226	125	197	0	0	2219	1298	1873	2874	910	637	469	30	0	13	1225	1169	838
Bacteria_Desulfobacterota_Desulfobacteria_Desulfobacterales_Desulfobacteraceae_Desulfotignum	1132	2214	2963	4397	1418	777	1543	2660	5151	3835	1760	458	931	2596	3621	3307	1804	820	8848	6904	2927	2482	720	623	9672	4283	2361	1156	2375	805	9982	5382	2043	1354	335	318	13090	10862	8696	4769	2295	1922	1622	1707	2402	7753	10367	7680	5170
Bacteria_Desulfobacterota_Desulfobacteria_Desulfobacterales_Desulfobacteraceae_uncultured	11639	31998	38495	57828	11413	4706	21004	36814	67622	57621	17739	5225	10722	44530	36170	40564	14034	5197	120301	62981	39062	33805	11729	6135	101448	44179	24188	13835	24690	13410	181857	42221	13255	10623	2899	2322	359507	165344	107411	90137	27174	18556	16507	9690	4097	3607	204470	91914	68564
Bacteria_Desulfobacterota_Desulfobacteria_Desulfobacterales_Desulfococcaceae_Desulfococcus	1088	2969	1715	1898	538	261	1756	2765	2234	1867	695	352	909	2479	1536	1432	462	236	5374	5096	3740	3663	546	311	5807	4812	2127	2065	1853	535	5567	5471	2019	1533	167	108	5305	5293	2993	1840	3590	2645	3215	1659	2260	372	6247	3094	2579
Bacteria_Desulfobacterota_Desulfobacteria_Desulfobacterales_Desulfococcaceae_Desulfonema	22931	52516	47657	56679	59096	42541	31017	54352	60579	49218	60971	35405	16780	47971	48489	46813	59629	35680	105950	78672	63995	59915	41863	28426	94777	72544	53902	49864	45423	48294	152332	60957	49570	46686	30558	22099	164070	78896	30456	14451	19108	17593	16553	9965	11455	7781	121574	37833	28097
Bacteria_Desulfobacterota_Desulfobacteria_Desulfobacterales_Desulfococcaceae_uncultured	17198	39142	37782	47775	58271	33771	24938	38464	44462	44458	51810	28621	14220	34853	37417	42445	62460	31624	76134	70310	68990	57157	30970	19449	68130	58961	58197	53830	38711	22840	74570	50154	55160	52285	27137	12416	202191	114718	71248	42187	57757	46110	42058	25455	35326	29937	133402	73614	59425
Bacteria_Desulfobacterota_Desulfobacteria_Desulfobacterales_Desulfolunaceae_Desulfatiferula	1105	2380	2525	3386	3273	1559	1798	2655	3503	3560	2954	2490	1033	2920	2739	3626	4316	1810	9513	6185	5782	4555	1825	1341	8301	8067	7949	4337	3645	1824	9464	5264	3828	2611	1097	642	67204	110066	17349	17271	8436	6270	4236	2028	1814	2385	88193	32123	21005
Bacteria_Desulfobacterota_Desulfobacteria_Desulfobacterales_Desulfolunaceae_Desulfofaba	3783	4236	5714	10361	9419	6090	3009	3856	6215	6634	25316	5958	2404	5409	5592	6125	10927	4373	6107	5836	4003	3002	1343	1218	5958	4572	3051	2081	2667	9820	5394	3281	2115	1514	697	365	18896	24999	5849	3460	3455	2637	2455	2064	2144	845	26690	7844	6208
Bacteria_Desulfobacterota_Desulfobacteria_Desulfobacterales_Desulfolunaceae_Desulfofrigus	1782	2090	1867	4267	2897	1563	1546	1900	1671	1970	4706	17347	1449	1801	1999	1747	2360	1121	11380	7466	4671	5204	2860	850	10128	11027	4482	5283	2540	1410	4529	7745	2023	2118	664	391	8920	6202	4819	8492	3735	2983	4568	6793	12396	8029	5855	4134	4495
Bacteria_Desulfobacterota_Desulfobacteria_Desulfobacterales_Desulfolunaceae_Desulfoluna	53	51	66	91	84	31	47	81	92	69	88	71	0	73	88	146	48	23	267	97	138	91	100	60	116	79	98	54	72	55	167	96	78	67	37	136	153	171	116	95	168	225	382	695	1271	936	88	108	68
Bacteria_Desulfobacterota_Desulfobacteria_Desulfobacterales_Desulfolunaceae_uncultured	3803	9006	9575	15758	12646	6682	6535	12493	17235	16888	18569	9096	3859	12535	10829	11785	13915	5312	56840	28938	23496	16992	6387	3079	35822	29199	14431	12062	9658	4523	38999	18734	8623	5324	3352	932	13879	37858	16820	7463	3827	2480	1968	1015	1666	3227	39368	10547	10309
Bacteria_Desulfobacterota_Desulfobacteria_Desulfobacterales_Desulforegulaceae_Desulforegula	85	175	108	237	100	30	94	181	319	164	71	30	71	123	178	155	125	43	128	120	55	50	19	15	117	126	65	46	39	27	190	114	48	42	16	0	1430	1025	403	264	787	269	244	99	52	551	1373	297	302
Bacteria_Desulfobacterota_Desulfobacteria_Desulfobacterales_Desulfosarcinaceae_Algorimarina	176	278	287	338	538	232	172	258	460	446	376	114	149	225	265	292	583	203	1077	1093	507	571	345	338	1409	855	532	477	441	361	1248	964	357	461	488	177	161	225	214	172	253	181	174	117	135	81	210	203	232
Bacteria_Desulfobacterota_Desulfobacteria_Desulfobacterales_Desulfosarcinaceae_Candidatus Magnetananas	1262	2136	2635	3518	4009	2584	1433	2298	3579	4162	3203	1901	1076	2026	2895	3351	4467	2415	13456	16911	7492	6727	3223	2187	16194	12550	8571	7882	5781	3096	14094	10005	6606	4881	1921	957	10909	18599	19840	6134	4233	3552	2777	1372	2547	1746	13993	15585	12586
Bacteria_Desulfobacterota_Desulfobacteria_Desulfobacterales_Desulfosarcinaceae_Candidatus Magnetoglobus	2722	3880	4599	4855	6961	6824	2941	4270	4754	5216	6056	5819	2325	3494	4593	4678	6991	5985	21502	31055	56461	64529	30306	32201	28487	31249	41879	61970	32842	23179	18654	30208	45387	61274	23692	17500	20726	17251	20380	8141	12680	10206	8193	1920	2358	1222	13768	15040	13487
Bacteria_Desulfobacterota_Desulfobacteria_Desulfobacterales_Desulfosarcinaceae_Candidatus Magnetomorum	168	205	243	203	251	232	191	279	179	217	268	212	170	203	281	322	269	208	1360	754	315	282	197	27	989	463	172	237	137	42	3376	823	195	115	51	0	69	315	654	203	630	413	346	157	154	192	165	367	409
Bacteria_Desulfobacterota_Desulfobacteria_Desulfobacterales_Desulfosarcinaceae_Desulfatibacillum	589	1107	1557	1781	1706	868	664	1028	1762	2095	1434	1085	484	1057	1434	1710	2065	790	5050	3720	2524	1768	962	6847	5586	2837	1823	1616	1838	11946	4719	1963	1494	1235	622	367	3575	3724	2903	1938	2429	2253	2006	871	1084	536	2950	2294	1969
Bacteria_Desulfobacterota_Desulfobacteria_Desulfobacterales_Desulfosarcinaceae_Desulfatirhabdium	5516	14280	20547	29277	44325	32650	8890	14630	26213	30534	40320	36295	4738	13912	21960	28375	49913	34410	55634	75360	51533	43184	23538	18084	56661	51326	50303	42023	30267	34029	58144	50827	57831	47904	20195	9594	76756	67497	41966	24770	33786	28383	27166	54904	92500	23584	64007	39823	34950
Bacteria_Desulfobacterota_Desulfobacteria_Desulfobacterales_Desulfosarcinaceae_Desulfatitalea	3801	6569	11709	15081	25386	18351	4900	7250	15880	16246	31681	15064	3405	6601	11645	14456	26192	18913	18027	18064	16481	16520	9652	5753	19753	13947	15195	14341	11286	4959	20766	13990	17059	19760	8268	4548	32305	28559	26633	24959	24516	20845	17455	5293	4515	2833	31747	19178	23295
Bacteria_Desulfobacterota_Desulfobacteria_Desulfobacterales_Desulfosarcinaceae_Desulfonatronobacter	452	718	1048	1899	929	684	448	720	823	768	738	548	390	608	752	775	876	573	962	1288	883	857	639	379	1359	1108	873	774	706	528	1088	945	750	855	431	164	718	914	708	400	467	337	281	291	333	142	845	541	777
Bacteria_Desulfobacterota_Desulfobacteria_Desulfobacterales_Desulfosarcinaceae_Desulfosalsimonas	69	85	78	83	112	78	72	92	79	99	95	72	73	55	82	116	195	71	341	520	449	617	508	290	395	318	433	360	493	204	619	394	619	658	409	215	506	566	742	486	419	423	547	559	164	67	440	603	332
Bacteria_Desulfobacterota_Desulfobacteria_Desulfobacterales_Desulfosarcinaceae_Desulfosarcina	29237	42001	53969	65569	85446	20814	31947	42399	57995	66777	74330	18610	23258	37940	50486	54296	79388	21527	310899	351403	170089	127862	41742	26144	282469	265150	124762	102435	97090	31300	246348	351711	148012	56563	24752	16306	27059	129550	147526	108777	133395	114331	101823	28077	20134	10122	74198	132220	123761
Bacteria_Desulfobacterota_Desulfobacteria_Desulfobacterales_Desulfosarcinaceae_Incertae Sedis	7474	13912	22124	26748	30155	15707	9303	14150	23895	29861	25679	14866	7000	12944	21506	26557	31653	14354	39845	27575	23028	18611	5689	3469	34584	22545	18027	16367	12050	5843	56041	19659	15099	11290	3362	1864	122497	63062	31752	23681	46040	51308	61390	32534	60357	15075	81750	42412	32112
Bacteria_Desulfobacterota_Desulfobacteria_Desulfobacterales_Desulfosarcinaceae_LCP-80	12105	21334	25559	30990	41271	23362	15551	25113	31617	33994	33220	18864	9780	20131	25891	26706	45008	21243	105495	135245	50699	43114	23195	18718	130361	94134	49115	34330	42604	22060	96436	95114	51152	34167	15093	8333	23366	92281	135842	87568	119703	84113	58433	16952	25679	16201	57223	92275	110776
Bacteria_Desulfobacterota_Desulfobacteria_Desulfobacterales_Desulfosarcinaceae_SEEP-SRB1	189414	363826	499873	627670	1313161	764189	252977	382087	588988	774046	1222752	658736	152034	337658	515405	564971	1431430	799661	477584	773862	825273	890494	1278876	1172666	592182	652683	833012	804231	1014982	1263539	438016	534513	834123	933798	1092387	827085	227758	494947	668532	368409	866920	742514	794093	479765	772996	569465	315051	467787	558998
Bacteria_Desulfobacterota_Desulfobacteria_Desulfobacterales_Desulfosarcinaceae_Sva0081 sediment group	1830228	2585274	3131339	2922956	4022723	3820532	1864661	2740842	2555887	2722039	3794106	2995343	1578960	2244923	3180766	2746981	3879742	2952742	1743275	2471140	3576223	3672953	1605436	858197	2291068	2557798	3164389	3973353	2107310	803344	1362408	2401854	3669809	3082686	1136925	685432	194638	990874	1070603	644877	908692	883238	924031	317215	321085	109571	579913	1070421	803585
Bacteria_Desulfobacterota_Desulfobacteria_Desulfobacterales_Desulfosarcinaceae_uncultured	40154	78287	119419	157548	193587	107681	55383	82718	141730	166538	165898	96755	33477	76028	120668	139852	205204	106154	397788	519208	256199	221414	119462	75947	410722	347603	229365	188528	164905	76514	394759	366753	269704	220655	102024	64103	254583	471668	497063	330220	410118	395123	357748	218452	163126	82792	341696	385263	393704
Bacteria_Desulfobacterota_Desulfobulbia_Desulfobulbales_Desulfobulbaceae_Candidatus Electronema	507	663	569	648	502	485	557	862	1132	881	401	464	398	581	816	730	405	432	418	638	791	706	966	474	533	604	710	846	953	427	460	544	916	670	249	228	10817	15339	7207	779	716	1340	451	507	429	477	2333	6352	2184
Bacteria_Desulfobacterota_Desulfobulbia_Desulfobulbales_Desulfobulbaceae_Candidatus Electrothrix	1133	748	756	827	5944	885	2079	6338	40259	34526	658	1626	886	1066	10784	3071	2254	1877	2736	4230	5903	2168	1375	2461	3404	6111	35475	52765	272586	12558	3391	9611	908	441	377	116	83117	262854	28025	3969	15307	2824	1357	585	724	543	48288	37858	5109
Bacteria_Desulfobacterota_Desulfobulbia_Desulfobulbales_Desulfobulbaceae_Desulfobulbus	13758	22291	25307	31412	34767	79068	15839	22919	39854	39628	27658	65423	11010	18789	25031	28621	40702	62533	10482	9603	8210	8097	3209	2298	9565	8324	6693	6118	8683	3219	11882	10037	7173	5646	3525	2414	26571	41508	25170	43480	40754	23380	16930	14943	7403	4062	17126	16423	18479
Bacteria_Desulfobacterota_Desulfobulbia_Desulfobulbales_Desulfobulbaceae_uncultured	229959	536192	832521	1044061	1044691	569286	366472	555655	973420	1106878	743452	596380	185157	504613	796367	900273	1189367	696115	120763	138455	80332	80156	19930	19527	162739	141554	141131	112838	74416	30719	94917	92518	79050	56369	8917	6665	85232	145126	133101	50614	148826	132825	117878	63037	94795	203607	81937	99640	76305
Bacteria_Desulfobacterota_Desulfobulbia_Desulfobulbales_Desulfocapsaceae_Desulfocapsa	11571	16170	25345	34984	40458	52284	12964	22409	45525	74967	30020	53361	9367	15994	25852	31236	63743	41510	16234	18257	13926	14616	3002	1972	18406	17064	10258	8385	25199	13573	21067	20126	9330	3919	845	1049	18034	107116	90922	99714	123886	151260	166770	78909	64776	16141	53511	121259	83974
Bacteria_Desulfobacterota_Desulfobulbia_Desulfobulbales_Desulfocapsaceae_Desulfofustis	2800	4211	4905	6817	3096	1517	3225	4307	6690	6454	3486	1467	2375	4432	5151	6100	3618	1529	3025	2564	1900	1795	620	501	2963	2227	1495	1221	2602	1563	3050	2771	1464	1118	437	182	2110	7542	5414	4034	2960	2794	2584	1387	954	363	4201	6273	4910
Bacteria_Desulfobacterota_Desulfobulbia_Desulfobulbales_Desulfocapsaceae_Desulfopila	16763	24029	21467	21032	13052	8545	17989	25333	22802	15579	19557	7070	15220	24042	21120	18376	14425	7555	23157	18773	12894	14129	4321	2220	22252	17925	13463	9161	9646	4666	26440	22825	9389	7830	4709	1149	15859	33315	27222	19326	11053	11703	8151	2251	1393	1053	19061	25601	22546
Bacteria_Desulfobacterota_Desulfobulbia_Desulfobulbales_Desulfocapsaceae_Desulfoprunum	916	1426	1991	2457	1199	526	1609	2267	2219	1835	1359	402	875	1555	2119	2025	1646	536	1204	699	492	441	68	79	1099	664	337	240	270	249	1018	601	255	181	0	0	231	493	620	631	649	378	442	281	104	43	274	466	525
Bacteria_Desulfobacterota_Desulfobulbia_Desulfobulbales_Desulfocapsaceae_Desulforhopalus	27870	26942	19572	25029	10229	5960	23648	23494	24751	16309	13170	5743	23477	31940	19282	18625	10604	6303	35992	20932	13461	11475	3067	2525	30063	18422	7001	5431	9523	4042	48852	27361	4536	2949	386	330	13129	44997	26536	18046	12240	13889	12364	4434	2526	1170	25328	33064	18337
Bacteria_Desulfobacterota_Desulfobulbia_Desulfobulbales_Desulfocapsaceae_Desulfotalea	9004	10572	8839	11149	1839	970	8440	9828	8628	5422	5444	1610	8514	12875	9172	7241	2403	1475	3839	3017	1558	1253	181	139	3558	2820	985	782	1169	652	3841	3231	600	534	22	22	9292	22108	11809	6163	3408	2197	1610	1113	385	360	13105	12307	7837
Bacteria_Desulfobacterota_Desulfobulbia_Desulfobulbales_Desulfocapsaceae_SEEP-SRB4	36039	60649	65031	69655	8244	6098	45516	60055	67868	46222	12003	5398	29879	55821	61329	64457	10813	6488	32450	20884	11881	11305	5094	4372	30195	17979	8892	6898	12211	12536	42253	25459	4989	4090	2810	1891	27050	12993	7083	4121	3735	3321	2770	1938	1512	766	14351	11613	5239
Bacteria_Desulfobacterota_Desulfobulbia_Desulfobulbales_Desulfocapsaceae_[Desulfobacterium] catecholicum group	24316	33757	37210	46232	33870	26617	26828	31909	45094	38603	92606	34449	23453	38145	40395	39475	36833	24947	28767	36695	27245	21966	3222	2992	27219	26978	18067	17784	14319	20460	18198	27783	19536	12651	337	394	42885	72117	86711	118233	89509	68567	62693	32023	10930	9859	48673	68299	102068
Bacteria_Desulfobacterota_Desulfobulbia_Desulfobulbales_Desulfocapsaceae_uncultured	134744	147289	152880	121968	33999	19159	116481	149236	126088	83146	39818	36060	119574	134921	138850	115305	30420	16577	253725	193359	89758	67415	13606	8553	277895	200616	50507	37883	69321	15543	223565	300283	31009	9828	2064	2454	45760	162690	124728	124577	64355	62822	60917	21088	14219	7457	90390	158130	127566
Bacteria_Desulfobacterota_Desulfobulbia_Desulfobulbales_Desulfurivibrionaceae_Desulfurivibrio	1820	3843	4540	7738	5805	8212	2827	4873	12417	10199	4909	14013	1525	3656	5610	5675	8792	10622	2157	1565	1259	1122	423	293	2204	1820	1255	1010	996	408	2447	979	780	703	240	170	6704	4711	1955	495	981	1044	870	396	410	391	3239	1395	1060
Bacteria_Desulfobacterota_Desulfobulbia_Desulfobulbales_Desulfurivibrionaceae_MSBL7	4155	7357	8368	12426	17620	14397	5882	8855	20321	31580	18371	52298	3878	7294	9674	9839	51481	50979	25490	17821	16351	23992	26331	42397	16939	17799	21122	14531	38249	33800	17093	15501	14515	6428	5512	4112	14914	19269	11858	19463	254158	294059	135422	7697	6089	20784	10573	13427	13708
Bacteria_Desulfobacterota_Desulfobulbia_Desulfobulbales_Desulfurivibrionaceae_uncultured	0	69	72	85	191	545	0	52	64	126	266	527	0	37	64	122	252	575	437	198	390	559	545	502	225	99	169	186	244	699	450	132	679	525	82	774	338	416	361	248	431	348	277	157	152	67	239	211	212
Bacteria_Desulfobacterota_Desulfofervidia_Desulfofervidales_Desulfofervidaceae_Candidatus Desulfofervidus	31	72	60	56	27	0	37	25	51	46	33	17	34	49	66	99	31	0	64	67	42	41	56	39	75	80	46	25	25	27	51	47	83	35	0	0	14	40	42	21	27	49	18	0	12	0	27	32	25
Bacteria_Desulfobacterota_Desulfomonilia_Desulfomonilales_Desulfomonilaceae_Desulfomonile	2766	4611	3250	4229	5714	2904	3263	3771	4261	4561	3411	2877	2335	3824	3469	3724	5174	2746	9103	9665	11431	11341	5679	2481	10200	10142	11350	10911	8016	2708	8182	8776	7094	8016	3177	1965	5075	8106	6002	3424	5219	4278	3250	3175	2090	804	6374	5530	4769
Bacteria_Desulfobacterota_Desulfovibrionia_Desulfovibrionales_Desulfohalobiaceae_Desulfohalobium	178	252	196	235	174	112	198	232	179	142	139	75	163	224	188	177	224	107	110	154	74	81	73	50	117	114	112	116	99	51	135	115	87	98	102	45	67	128	120	91	79	89	82	52	62	41	84	110	92
Bacteria_Desulfobacterota_Desulfovibrionia_Desulfovibrionales_Desulfohalobiaceae_Desulfovermiculus	2679	3987	3043	3941	3374	1601	2947	3224	3142	3272	2790	1699	2394	3477	3252	3170	3266	1642	1631	2022	1366	1370	2254	2901	2208	1658	1605	1408	2170	2496	1489	1345	1233	1425	2310	2493	1097	2555	2631	1385	2011	2014	2106	1462	3467	6730	1592	2213	1653
Bacteria_Desulfobacterota_Desulfovibrionia_Desulfovibrionales_Desulfomicrobiaceae_Desulfomicrobium	1277	1609	1568	1724	1876	1817	1244	1477	1520	1438	1996	2089	1086	1327	1534	1542	1817	1735	903	1169	998	990	1259	730	920	885	1066	1189	1143	752	763	794	1200	1201	1104	526	765	1168	1040	1255	580	569	474	1084	624	473	800	799	537
Bacteria_Desulfobacterota_Desulfovibrionia_Desulfovibrionales_Desulfonatronaceae_Desulfonatronum	163	232	138	141	112	91	181	271	242	220	91	90	143	191	156	123	145	84	197	224	141	139	108	55	260	193	151	154	243	38	241	155	72	124	63	111	181	122	84	72	64	22	40	35	26	0	104	72	81
Bacteria_Desulfobacterota_Desulfovibrionia_Desulfovibrionales_Desulfonatronovibrionaceae_Desulfonatronospira	141	162	49	34	272	28	123	65	53	52	208	0	92	100	32	49	240	32	43	101	53	41	41	21	88	109	41	61	25	0	0	61	45	28	0	0	121	81	95	50	113	84	58	51	49	95	60	78	62
Bacteria_Desulfobacterota_Desulfovibrionia_Desulfovibrionales_Desulfonatronovibrionaceae_Desulfonatronovibrio	189	277	275	331	802	2099	173	243	357	469	1068	2105	144	185	236	352	1088	1151	206	288	404	624	2439	1331	185	208	458	445	1608	1379	142	189	351	687	2545	815	69	82	99	47	62	46	49	53	84	54	63	81	55
Bacteria_Desulfobacterota_Desulfovibrionia_Desulfovibrionales_Desulfonauticaceae_Desulfonauticus	251	362	181	356	483	470	290	345	351	278	489	471	232	363	271	175	524	516	239	299	237	294	103	65	339	303	297	191	155	52	256	261	254	337	72	37	41	152	272	322	274	199	138	82	44	37	73	189	220
Bacteria_Desulfobacterota_Desulfovibrionia_Desulfovibrionales_Desulfonauticaceae_Desulfothermus	233	247	130	175	125	140	138	134	179	133	114	138	169	179	161	128	57	102	86	70	35	29	38	42	81	39	32	28	24	34	62	24	27	40	21	0	132	320	178	62	90	54	57	10	21	15	294	171	95
Bacteria_Desulfobacterota_Desulfovibrionia_Desulfovibrionales_Desulfoplanaceae_Desulfoplanes	513	998	257	585	179	42	792	815	1842	341	104	73	354	809	524	318	198	53	147	173	209	148	154	56	238	229	229	147	155	97	132	124	194	155	103	35	1742	717	331	192	246	148	128	98	122	134	821	489	270
Bacteria_Desulfobacterota_Desulfovibrionia_Desulfovibrionales_Desulfovibrionaceae_Bilophila	300	304	156	212	123	93	230	175	156	151	128	87	243	197	166	214	87	141	90	134	89	102	112	57	106	98	67	83	60	50	58	78	84	77	56	63	32	73	108	70	59	73	52	74	51	40	48	81	81
Bacteria_Desulfobacterota_Desulfovibrionia_Desulfovibrionales_Desulfovibrionaceae_Desulfobaculum	61	41	0	0	0	0	38	37	0	0	0	0	77	46	0	0	0	0	0	0	0	0	0	0	0	0	0	0	0	0	0	0	0	0	0	0	0	19	0	0	0	0	0	0	0	0	0	16	0
Bacteria_Desulfobacterota_Desulfovibrionia_Desulfovibrionales_Desulfovibrionaceae_Desulfocurvus	98	140	55	68	67	23	62	62	52	49	92	45	73	70	58	44	51	50	51	45	72	83	75	31	76	69	65	65	58	19	54	22	75	91	83	0	538	592	413	261	109	51	121	108	71	46	399	300	123
Bacteria_Desulfobacterota_Desulfovibrionia_Desulfovibrionales_Desulfovibrionaceae_Desulfovibrio	12778	18342	10172	13797	10982	7755	14047	15310	14590	12023	10104	7615	10825	16485	11665	11414	12375	7417	16987	14258	12195	13389	13092	11694	15473	11462	11498	10388	10975	11664	15978	8972	9985	11181	11507	11789	26293	23551	15206	8739	11842	11530	14775	21473	21782	7481	17169	13847	10133
Bacteria_Desulfobacterota_Desulfovibrionia_Desulfovibrionales_Desulfovibrionaceae_Halodesulfovibrio	1029	630	375	434	260	148	676	486	448	429	553	143	963	549	383	389	272	156	981	384	294	358	228	208	518	312	267	178	329	238	703	186	150	203	162	86	353	217	182	101	205	167	145	94	133	105	231	152	132
Bacteria_Desulfobacterota_Desulfovibrionia_Desulfovibrionales_Desulfovibrionaceae_Lawsonia	91	44	0	0	0	0	60	23	0	0	0	0	91	46	0	0	0	0	92	110	27	28	0	0	89	78	21	21	30	0	169	80	26	0	0	0	39	398	363	205	147	106	91	115	170	174	149	323	278
Bacteria_Desulfobacterota_Desulfovibrionia_Desulfovibrionales_Desulfovibrionaceae_Mailhella	429	423	107	151	111	41	352	260	104	88	105	54	302	289	124	88	121	55	153	98	71	70	41	32	197	73	33	46	53	20	140	57	35	32	38	0	34	57	42	23	39	41	54	0	10	0	46	47	32
Bacteria_Desulfobacterota_Desulfovibrionia_Desulfovibrionales_Desulfovibrionaceae_uncultured	2448	2982	2290	2825	3063	2772	2385	2281	2890	3106	3557	3016	1943	2664	2397	3178	2755	3572	1593	1566	1228	1217	1202	915	1758	1567	1226	976	1113	746	1568	1000	1103	1239	1098	786	1106	2084	1622	692	1212	1400	1282	511	597	532	1125	1631	947
Bacteria_Desulfobacterota_Desulfuromonadia_Bradymonadales_Bradymonadaceae_Bradymonas	17613	18229	3271	4404	2295	1278	15864	13972	4930	3579	1718	1025	13059	16178	4860	3569	2366	1233	4668	4230	2742	3014	2214	1099	4475	2947	3269	2696	7195	1418	7630	3488	2613	3429	1899	1022	3217	7727	4430	1886	2178	1773	1364	1584	1014	933	7430	3869	2681
Bacteria_Desulfobacterota_Desulfuromonadia_Desulfuromonadales_Desulfuromonadaceae_Candidatus Deferrimonas	0	0	0	0	0	0	0	0	0	0	0	0	0	202	0	0	0	0	0	0	0	0	0	0	0	0	0	0	0	0	0	0	0	0	0	0	0	0	0	0	0	0	0	0	0	0	0	0	0
Bacteria_Desulfobacterota_Desulfuromonadia_Desulfuromonadales_Desulfuromonadaceae_Desulfuromonas	51976	126030	97577	134153	8457	3974	95349	145860	153851	60905	7070	5596	53413	150150	72445	60462	9858	5022	11893	5027	3440	3515	1377	809	8707	4260	3406	2519	4496	1223	17214	3885	3015	2950	554	460	7486	7577	8487	6303	11244	4705	6719	25397	18882	13656	6211	6009	4945
Bacteria_Desulfobacterota_Desulfuromonadia_Desulfuromonadales_Desulfuromonadaceae_Trichloromonas	1169	1855	2423	2501	397	295	1673	2085	2532	1898	515	291	1116	1911	1733	2164	481	157	424	1160	675	454	180	253	775	564	579	564	1679	4995	485	451	701	526	108	0	490	3574	5602	21735	10983	8014	4492	13743	11247	2935	1542	3213	15351
Bacteria_Desulfobacterota_Desulfuromonadia_Desulfuromonadales_Geoalkalibacteraceae_Geoalkalibacter	681	1364	1219	1635	862	556	883	1355	1464	1298	703	479	1198	1960	1067	1134	624	541	536	604	359	377	255	203	702	543	399	369	392	236	503	404	389	475	110	156	112	259	389	219	380	421	352	221	210	89	135	237	306
Bacteria_Desulfobacterota_Desulfuromonadia_Desulfuromonadales_Geopsychrobacteraceae_Desulfuromusa	19767	30112	23788	33613	6906	1847	23337	31000	35764	24630	4559	3155	18177	31644	24820	20673	8992	3015	25286	6956	6770	10185	3033	2374	17724	8173	5045	3187	18760	4524	53490	4984	3052	1054	647	652	31021	40328	45989	17008	19815	8616	5138	23153	3421	1678	16445	19936	14284
Bacteria_Desulfobacterota_Desulfuromonadia_Desulfuromonadales_Geopsychrobacteraceae_Geopsychrobacter	16619	39570	57209	77124	20961	1688	27119	44196	64939	40514	17565	1319	14360	40646	35971	37502	23880	3039	16331	4706	2881	2544	909	579	18387	8678	5178	3062	3406	1406	38560	4696	3508	1223	347	237	76386	17322	11267	2561	5605	3215	2772	1355	1881	2155	23783	13742	7027
Bacteria_Desulfobacterota_Desulfuromonadia_Desulfuromonadales_Geopsychrobacteraceae_Malonomonas	3702	3954	4309	5370	852	236	3613	4551	4731	3760	498	235	3159	4390	4500	4102	1359	239	3491	1822	662	583	322	261	4123	2027	1114	659	1602	436	8496	2107	529	167	150	124	2242	5860	1690	386	483	934	861	2576	620	145	2584	1323	751
Bacteria_Desulfobacterota_Desulfuromonadia_Desulfuromonadales_Geopsychrobacteraceae_Pelobacter	527	878	380	502	111	68	649	858	433	374	102	519	401	880	527	297	120	42	246	173	226	292	271	166	553	216	301	201	219	212	524	207	333	250	320	147	246	1658	659	159	417	634	898	5311	973	700	431	438	283
Bacteria_Desulfobacterota_Desulfuromonadia_Desulfuromonadales_Geothermobacteraceae_Geothermobacter	24339	58384	43663	52864	2967	1363	44125	65714	52219	22430	2342	1448	23804	64487	37279	28816	4074	1763	7001	3729	4696	4156	1590	1023	6746	3644	3943	3679	4167	3936	11765	3222	3221	2350	1276	691	3961	11593	14306	7556	15659	22703	25245	12752	26640	4881	6925	12741	9977
Bacteria_Desulfobacterota_Desulfuromonadia_Desulfuromonadales_Syntrophotaleaceae_Syntrophotalea	5327	9087	10340	12654	2452	1334	7387	9923	9155	7639	2401	2020	5734	9392	8656	9007	2588	1513	7986	13896	8876	5674	1074	993	11763	11848	7104	5990	3586	15872	3188	9771	6022	3988	270	295	1074	4773	8442	11987	24980	2767	6130	23951	24886	17286	2577	5180	6908
Bacteria_Desulfobacterota_Desulfuromonadia_Geobacterales_Geobacteraceae_Citrifermentans	1961	2993	2081	2516	2111	2180	2018	2394	2458	1909	1916	1817	1675	2843	2080	2050	2681	2175	1853	1593	1381	1436	1553	1115	1688	1461	1282	1255	1139	1101	2049	1090	1839	1626	1602	1061	3524	2025	1742	1359	2183	1458	1502	4739	4598	2746	1685	1488	1298
Bacteria_Desulfobacterota_Desulfuromonadia_Geobacterales_Geobacteraceae_Geobacter	3315	5013	4076	4533	3234	2268	3790	4385	4649	3342	2995	2174	3137	4990	3689	3715	3347	2426	3333	3148	2985	3353	3685	2131	3905	2658	2698	2726	3124	1917	3313	2422	3363	4083	4340	1677	44420	12137	10034	5332	6408	3687	3332	8520	6966	3132	11631	10418	6173
Bacteria_Desulfobacterota_Desulfuromonadia_Geobacterales_Geobacteraceae_Geotalea	152	191	104	109	55	50	170	170	193	104	100	0	121	227	120	82	72	82	1111	418	205	185	51	66	1126	509	238	136	325	569	1635	241	102	49	132	358	223	419	389	678	1366	414	730	3778	2660	1165	244	359	311
Bacteria_Desulfobacterota_Desulfuromonadia_Geobacterales_Geobacteraceae_Trichlorobacter	363	287	277	368	352	267	243	272	422	229	316	224	252	291	237	302	345	229	376	288	237	227	178	138	326	256	304	224	194	197	569	344	299	204	264	75	950	424	448	350	446	261	327	257	239	110	384	326	351
Bacteria_Desulfobacterota_Desulfuromonadia_Geobacterales_Geobacteraceae_uncultured	3164	4690	3027	3684	3142	2103	3633	4124	3960	3587	2367	2206	2598	4710	3000	3276	2986	1886	4056	3060	2557	2022	2279	1886	3317	2762	2221	1826	1842	1678	3911	2039	2781	1843	2346	1703	8542	10417	6943	9174	13601	3810	6222	37043	23917	6931	8602	5257	5205
Bacteria_Desulfobacterota_Desulfuromonadia_Geobacterales_Pseudopelobacteraceae_Pseudopelobacter	0	0	0	0	0	0	0	0	0	0	0	0	0	0	0	0	0	0	0	0	0	0	0	0	0	0	0	0	0	0	0	0	0	0	0	0	134	373	114	97	167	133	45	0	0	0	246	150	60
Bacteria_Desulfobacterota_Dissulfuribacteria_Dissulfuribacterales_Dissulfuribacteraceae_Dissulfuribacter	49	89	82	150	322	414	41	52	148	224	321	555	28	87	91	174	381	1701	88	211	227	240	636	2496	106	140	148	189	771	765	65	90	388	356	505	1237	362	858	1022	389	736	754	755	501	632	1039	557	722	722
Bacteria_Desulfobacterota_Dissulfuribacteria_Dissulfuribacterales_Dissulfuribacteraceae_Dissulfurimicrobium	297	553	504	686	727	295	421	500	859	690	570	415	265	493	638	734	943	302	869	866	501	497	596	372	906	675	429	369	577	487	1014	521	438	579	609	403	845	891	335	171	223	168	124	70	62	60	703	395	240
Bacteria_Desulfobacterota_Dissulfuribacteria_Dissulfuribacterales_Dissulfuribacteraceae_Dissulfurirhabdus	0	30	18	28	29	0	0	34	66	30	48	0	0	38	24	26	21	0	106	141	51	55	0	20	96	109	48	47	43	17	82	74	40	45	34	22	0	0	0	0	0	0	0	0	0	0	0	0	0
Bacteria_Desulfobacterota_Dissulfuribacteria_Dissulfuribacterales_Dissulfuribacteraceae_SEEP-SRB2	788	1127	1350	1461	2030	857	901	932	1325	1477	1773	928	619	961	1154	1139	2094	1016	1604	1843	5740	12863	10517	1927	1453	1564	4482	7168	3455	1126	1568	1316	8865	13992	16906	2972	26597	50728	3751	4546	53100	22422	15586	827	626	4293	41649	9132	9720
Bacteria_Desulfobacterota_Dissulfuribacteria_Dissulfuribacterales_Dissulfuribacteraceae_uncultured	3127	5287	5506	6233	6027	3385	3775	4448	6133	6326	5046	3333	2945	5008	5821	7032	4268	2718	3517	3917	3882	3875	6350	3526	3955	4212	2876	3377	2970	4134	1964	2798	3948	3615	3708	3470	452	1074	1266	1290	7215	3472	2467	261	336	538	821	889	1614
Bacteria_Desulfobacterota_Syntrophia_Syntrophales_Smithellaceae_Smithella	1798	4757	5521	6922	11832	18827	3290	6112	5892	5043	20764	22233	1714	4259	4255	5785	21245	23217	3490	6475	11237	12749	18358	2942	2921	4608	14842	11099	9642	4011	3569	4176	14319	11009	19995	3529	3019	4709	5826	14624	40026	93592	141761	677278	614434	134911	3456	4232	6012
Bacteria_Desulfobacterota_Syntrophia_Syntrophales_Syntrophaceae_Syntrophus	3314	5048	4672	5714	7094	4149	3693	4621	6067	6277	6225	3571	2640	4576	4596	5118	7313	5885	4102	5051	5328	5160	4684	4861	4487	4538	4018	4577	4125	5470	4205	3547	5200	5230	4748	2599	7177	9421	6969	3964	15392	22776	37383	105163	149131	96759	7765	6329	4913
Bacteria_Desulfobacterota_Syntrophobacteria_Syntrophobacterales_Syntrophobacteraceae_Desulfacinum	158	338	345	420	347	323	264	346	323	297	246	240	126	280	336	442	471	297	274	185	238	185	46	66	216	239	265	184	137	72	139	95	139	171	59	24	848	441	71	43	133	182	112	168	90	37	546	199	134
Bacteria_Desulfobacterota_Syntrophobacteria_Syntrophobacterales_Syntrophobacteraceae_Desulfoglaeba	0	0	0	0	0	0	0	0	0	0	0	0	0	0	0	0	0	0	0	0	0	0	0	0	0	0	0	0	0	0	0	0	0	0	0	0	0	0	0	0	0	0	0	0	0	0	0	0	0
Bacteria_Desulfobacterota_Syntrophobacteria_Syntrophobacterales_Syntrophobacteraceae_Desulforhabdus	625	873	905	1040	1060	900	745	903	818	756	847	671	544	858	902	799	901	783	790	996	1037	850	427	436	851	868	894	946	1487	478	756	766	719	1052	3086	274	238	704	661	369	255	388	405	368	560	426	417	643	421
Bacteria_Desulfobacterota_Syntrophobacteria_Syntrophobacterales_Syntrophobacteraceae_Desulfosoma	115	245	109	273	285	106	111	191	166	237	231	98	50	175	179	172	231	163	117	157	374	404	272	158	147	141	200	279	255	134	82	79	172	543	217	138	363	351	189	107	74	89	92	136	199	27	341	204	97
Bacteria_Desulfobacterota_Syntrophobacteria_Syntrophobacterales_Syntrophobacteraceae_Desulfovirga	190	296	227	345	699	243	194	314	374	306	234	183	140	263	282	326	380	157	345	418	562	425	137	74	440	495	778	667	260	86	297	362	409	486	91	32	1364	546	249	139	95	102	76	212	101	85	644	267	196
Bacteria_Desulfobacterota_Syntrophobacteria_Syntrophobacterales_Syntrophobacteraceae_Syntrophobacter	1468	2173	1495	2054	2316	2783	1546	2064	1886	2168	2520	2979	1163	1886	1700	1994	2147	2403	1433	1731	1730	2056	4918	2148	1658	1376	1675	1632	3594	1516	1818	1172	6516	3930	4245	1303	2471	3202	1995	821	1352	1188	1211	844	1164	1170	2411	1423	1303
Bacteria_Desulfobacterota_Syntrophobacteria_Syntrophobacterales_Syntrophobacteraceae_uncultured	1427	2200	2405	2927	3303	2081	1596	2038	2644	3058	2960	2153	1254	2038	2435	2950	3099	2036	3075	3818	3956	3958	3108	2378	2647	2686	3571	3420	3060	2351	4164	3259	3276	3432	6511	2450	1546	2436	2487	1205	1587	1384	1121	831	1094	721	1797	1901	1589
Bacteria_Desulfobacterota_Syntrophobacteria_Syntrophobacterales_Thermodesulforhabdaceae_Thermodesulforhabdus	271	233	293	521	286	215	211	240	379	489	316	214	171	207	337	439	268	230	598	516	242	293	190	145	894	551	418	245	285	152	432	311	194	159	130	103	139	689	1143	334	97	58	46	23	27	18	367	757	762
Bacteria_Desulfobacterota_Syntrophorhabdia_Syntrophorhabdales_Syntrophorhabdaceae_Syntrophorhabdus	1808	2720	2491	3065	3253	2067	2132	2511	2925	3039	2406	1910	1667	2667	2558	2767	3308	1955	1810	2171	2101	1816	2498	1382	2269	1966	1958	1783	1749	1589	1536	1416	2221	2156	1840	1273	943	2119	2357	1274	2247	3109	4278	31398	29026	8504	1429	1756	1967
Bacteria_Desulfobacterota_Thermodesulfobacteria_Thermodesulfobacteriales_Thermodesulfobacteriaceae_Caldimicrobium	132	235	189	201	91	85	151	177	210	211	74	96	115	209	212	159	137	70	274	347	148	206	152	279	297	267	204	152	181	119	236	220	147	229	109	131	66	130	166	115	244	165	156	123	157	127	103	146	167
Bacteria_Desulfobacterota_Thermodesulfobacteria_Thermodesulfobacteriales_Thermodesulfobacteriaceae_Geothermobacterium	0	0	0	0	0	0	0	0	0	0	0	0	0	0	0	0	0	0	0	0	0	30	0	0	0	0	0	0	0	0	0	0	0	0	0	0	0	0	0	0	0	0	0	0	0	0	0	0	0
Bacteria_Desulfobacterota_Thermodesulfobacteria_Thermodesulfobacteriales_Thermodesulfobacteriaceae_Thermodesulfatator	0	0	0	0	0	0	0	0	0	0	0	0	0	0	0	0	0	0	0	52	0	0	0	0	0	31	0	0	0	0	0	0	0	0	0	0	0	0	0	0	0	0	0	0	0	0	0	0	0
Bacteria_Desulfobacterota_Thermodesulfobacteria_Thermodesulfobacteriales_Thermodesulfobacteriaceae_Thermodesulfobacterium	0	0	0	23	0	0	0	0	0	0	0	0	0	0	0	0	0	0	0	0	0	0	25	0	0	0	0	0	0	0	0	0	0	0	26	0	0	0	0	0	0	0	0	0	0	0	0	0	0
Bacteria_Desulfobacterota_Thermodesulfobacteria_Thermodesulfobacteriales_Thermodesulfobacteriaceae_Thermosulfurimonas	0	0	0	0	16	57	0	0	0	0	22	79	0	16	0	16	39	36	0	20	0	0	0	0	0	0	0	0	0	0	0	0	0	0	0	0	0	0	10	0	0	0	0	0	0	0	0	12	0
Bacteria_Desulfobacterota_Thermodesulfobacteria_Thermodesulfobacteriales_Thermodesulfobacteriaceae_Thermosulfuriphilus	20	0	0	27	0	0	0	0	0	0	0	0	22	17	0	0	0	0	32	142	45	17	0	0	63	122	43	33	25	0	31	56	41	17	0	0	0	15	24	10	0	0	0	0	0	0	0	12	15
Bacteria_Desulfobacterota_Thermodesulfobacteria_Thermodesulfobacteriales_Thermodesulfobacteriaceae_uncultured	146	301	314	560	594	345	221	351	440	412	434	200	136	410	356	472	544	261	340	539	775	968	1229	924	422	487	779	726	660	827	223	289	744	1289	965	953	391	236	226	163	216	122	145	77	124	119	212	146	178
Bacteria_Dictyoglomota_Dictyoglomia_Dictyoglomales_Dictyoglomaceae_Dictyoglomus	0	16	0	0	0	0	0	0	0	0	0	0	0	0	0	0	0	0	0	0	0	0	0	0	0	0	0	0	0	0	0	0	0	0	0	0	0	0	0	0	0	0	0	0	0	0	0	0	0
Bacteria_Elusimicrobiota_Elusimicrobia_Elusimicrobiales_Elusimicrobiaceae_Elusimicrobium	2797	1800	417	483	3478	1785	1552	1091	685	614	920	3007	2143	1499	438	466	2552	1040	244	278	323	277	5637	1874	232	205	521	651	1389	663	264	224	425	319	9750	9968	120	564	554	314	704	655	708	1154	1001	463	340	401	385
Bacteria_Elusimicrobiota_Endomicrobia_Endomicrobiales_Endomicrobiaceae_Endomicrobium	12973	16579	14707	15002	13841	9189	12782	13338	13057	15409	13722	9091	11453	13149	13161	84711	19718	9080	6872	12102	20018	14095	13216	10037	10129	8781	13293	13254	12061	11223	6935	9696	15032	14563	11968	8703	1132156	1456583	1317238	835588	1093044	1189387	1164485	856121	923254	693974	975519	1233045	925805
Bacteria_Entotheonellaeota_Entotheonellia_Entotheonellales_Entotheonellaceae_Candidatus Entotheonella	69034	74234	56587	57201	75924	33249	57704	70049	59232	61303	72433	28006	54448	56454	58182	49072	72669	28710	2488	2917	1650	1848	2098	1402	3998	2046	1627	1445	1828	1454	3635	1796	1302	1662	2124	1374	5989	2790	3686	2598	2455	2583	2197	1276	2034	5914	2656	2178	2326
Bacteria_Fibrobacterota_Chitinivibrionia_Chitinivibrionales_Chitinivibrionaceae_Chitinivibrio	538	1072	88	71	27	0	646	796	466	84	22	0	349	1000	162	73	0	0	270	212	170	153	83	50	820	299	260	126	193	48	405	88	113	163	30	34	215	106	76	0	62	25	0	0	0	137	114	66	76
Bacteria_Fibrobacterota_Chitinivibrionia_Chitinivibrionales_Chitinivibrionaceae_possible genus 03	8181	27258	8038	12683	616	335	16907	28578	36645	4559	778	566	8620	25865	6074	3891	632	303	6126	6164	1520	1563	915	502	10890	6339	6577	1610	5633	1010	7732	2779	663	374	620	488	3595	2129	390	186	401	421	476	202	164	110	2599	911	385
Bacteria_Fibrobacterota_Chitinivibrionia_Chitinivibrionia Incertae Sedis_Unknown Family45_possible genus 02	98	177	236	222	295	287	153	175	211	116	558	96	79	209	201	206	634	165	115	117	50	44	30	25	171	80	59	67	110	23	140	84	45	31	32	0	812	268	34	15	74	31	56	16	14	13	415	136	39
Bacteria_Fibrobacterota_Fibrobacteria_Fibrobacterales_Fibrobacteraceae_BBMC-4	0	0	0	0	0	0	0	0	0	0	0	0	0	0	0	0	0	0	0	0	0	0	0	0	0	0	0	0	0	0	0	0	0	0	0	0	7540	19797	17031	8581	13841	15051	12914	14215	9835	11542	9913	11642	10679
Bacteria_Fibrobacterota_Fibrobacteria_Fibrobacterales_Fibrobacteraceae_Chitinispirillum	0	545	602	739	0	0	0	341	744	0	0	0	120	603	600	0	311	0	125	182	500	349	0	0	0	170	201	424	0	0	0	195	525	341	121	0	387	233	870	1185	503	456	769	605	609	530	262	569	622
Bacteria_Fibrobacterota_Fibrobacteria_Fibrobacterales_Fibrobacteraceae_Fibrobacter	1373	2180	626	905	612	345	1478	1606	1381	998	381	244	1234	2043	749	721	648	294	600	947	964	943	1245	417	1041	583	696	835	538	191	804	549	634	853	1183	312	1102	967	804	460	567	548	600	726	676	589	889	798	615
Bacteria_Fibrobacterota_Fibrobacteria_Fibrobacterales_Fibrobacteraceae_possible genus 04	1574	2561	839	1450	1205	99	1982	1802	2383	1583	265	93	3487	5386	1245	1509	914	143	727	399	1112	1289	1043	219	1832	570	1167	1163	625	297	1290	197	756	1141	948	258	2985	1045	581	349	390	312	233	144	188	256	1314	906	753
Bacteria_Fibrobacterota_Fibrobacteria_Fibrobacterales_Fibrobacteraceae_possible genus 05	41	62	153	204	62	45	57	108	181	102	41	41	35	78	139	101	73	52	48	92	39	32	21	24	81	77	29	29	30	15	36	34	49	33	37	0	14	34	31	22	35	51	52	22	45	28	16	29	32
Bacteria_Fibrobacterota_Fibrobacteria_Fibrobacterales_Fibrobacteraceae_possible genus 06	109	317	34	34	23	0	246	254	129	26	0	31	114	293	52	32	0	15	80	59	44	46	38	19	84	52	42	30	0	0	186	25	0	15	0	0	287	73	51	49	45	37	68	66	23	65	94	63	114
Bacteria_Fibrobacterota_Fibrobacteria_Fibrobacterales_Fibrobacteraceae_uncultured	85524	104155	32600	54817	54527	8014	81203	86430	67107	58333	27675	6590	75317	97970	40221	42389	55133	8572	16077	15217	19314	22685	22830	7049	30943	15810	37305	25053	17935	9507	22853	8697	16901	25281	14299	3636	38108	39414	23249	8334	9834	7211	4833	4050	4215	3361	32783	19602	18946
Bacteria_Fibrobacterota_Fibrobacteria_Fibrobacterales_Unknown_Family6_BBMC-4	5296	14859	9313	15858	15776	8663	8473	13255	16794	18578	14714	12764	4519	13935	10752	16703	13018	9593	7524	9558	12793	19343	27539	14541	8702	7296	16463	16783	13573	16256	7535	5773	15886	23966	30246	16051	0	0	0	0	0	0	0	0	0	0	0	0	0
Bacteria_Firmicutes_Bacilli_Acholeplasmatales_Acholeplasmataceae_Acholeplasma	476	464	325	359	227	228	463	397	532	262	185	195	420	390	310	293	220	182	582	558	582	486	765	366	653	620	841	586	450	533	718	474	639	355	595	213	5136	14601	12522	11285	14912	14895	11248	6289	4776	1679	9367	11297	13650
Bacteria_Firmicutes_Bacilli_Acholeplasmatales_Acholeplasmataceae_Anaeroplasma	338	290	196	221	171	214	201	218	225	177	161	135	228	221	334	166	177	129	253	278	151	148	171	123	264	209	162	194	156	88	307	202	188	110	153	83	571	709	394	289	277	214	223	218	132	123	524	419	338
Bacteria_Firmicutes_Bacilli_Acholeplasmatales_Acholeplasmataceae_Candidatus Phytoplasma	751	752	507	657	735	728	566	662	651	554	1014	487	582	614	578	697	596	722	1557	3583	1291	1344	801	813	5058	3469	1541	1139	1135	568	894	2230	2111	1200	643	458	2006	3571	3260	2263	3013	3713	3070	1895	1353	998	2174	3161	2814
Bacteria_Firmicutes_Bacilli_Acholeplasmatales_Acholeplasmataceae_DMI	0	15	0	0	0	0	0	17	0	18	0	0	0	16	20	30	0	0	30	30	18	24	0	0	31	28	15	17	0	0	0	16	0	0	0	0	18	86	29	0	86	38	0	0	0	25	51	44	19
Bacteria_Firmicutes_Bacilli_Acholeplasmatales_Acholeplasmataceae_EMP-G18	0	0	0	0	0	0	0	0	0	0	0	0	0	0	0	0	0	0	0	0	0	0	0	0	0	0	0	0	0	0	0	0	0	0	0	0	16	0	0	0	0	0	0	0	0	0	12	0	0
Bacteria_Firmicutes_Bacilli_Acholeplasmatales_Acholeplasmataceae_EUB33-2	0	0	0	0	0	0	0	0	0	0	0	0	0	0	0	0	0	0	0	0	0	0	0	0	0	0	0	0	0	0	0	0	0	0	0	0	177	726	697	371	325	240	166	66	82	57	377	525	539
Bacteria_Firmicutes_Bacilli_Acholeplasmatales_Acholeplasmataceae_NED5E9	0	0	0	0	0	0	0	0	0	0	0	0	0	0	0	0	0	0	0	0	0	0	0	0	0	0	0	0	0	0	0	0	0	0	0	0	0	0	0	0	0	0	0	10	0	0	0	0	0
Bacteria_Firmicutes_Bacilli_Acholeplasmatales_Acholeplasmataceae_T2WK15B57	0	0	0	0	0	0	33	40	0	0	0	0	0	0	0	0	0	0	0	0	0	0	0	0	0	0	0	0	0	0	0	0	0	0	0	0	51	148	89	91	55	59	44	37	16	0	100	98	109
Bacteria_Firmicutes_Bacilli_Alicyclobacillales_Alicyclobacillaceae_Acidibacillus	484	503	50	52	79	58	513	512	77	50	136	62	450	468	90	22	64	55	82	112	170	170	349	181	99	114	134	231	222	105	75	87	163	180	206	121	62	227	74	51	37	55	39	44	45	34	160	88	47
Bacteria_Firmicutes_Bacilli_Alicyclobacillales_Alicyclobacillaceae_Alicyclobacillus	192	354	201	229	360	298	187	294	235	257	276	479	131	310	246	200	326	260	240	291	333	472	1077	639	286	293	268	438	794	469	206	231	257	326	645	1396	137	315	260	133	190	241	209	148	202	136	183	252	176
Bacteria_Firmicutes_Bacilli_Alicyclobacillales_Alicyclobacillaceae_Effusibacillus	339	582	55	101	40	65	482	493	88	62	38	108	341	451	54	103	0	35	165	244	322	322	450	618	231	233	462	322	213	115	154	156	55	302	388	46	112	58	34	10	31	37	13	17	23	0	44	29	28
Bacteria_Firmicutes_Bacilli_Alicyclobacillales_Alicyclobacillaceae_Tumebacillus	690	754	244	291	201	193	618	592	282	272	209	183	537	607	317	249	267	161	642	694	560	727	942	333	660	696	426	541	735	168	380	550	534	360	720	835	86	158	131	148	143	161	195	125	179	105	121	200	170
Bacteria_Firmicutes_Bacilli_Aneurinibacillales_Aneurinibacillaceae_Aneurinibacillus	159	146	173	153	129	138	95	136	108	90	101	110	123	121	132	174	112	119	151	205	374	375	269	84	240	317	218	407	198	29	190	374	337	216	170	207	67	116	164	90	122	150	105	72	61	52	78	154	115
Bacteria_Firmicutes_Bacilli_Bacillales_Bacillaceae_Aeribacillus	41	29	26	0	0	0	22	19	20	0	0	35	0	22	0	19	0	0	0	22	41	52	48	23	27	0	0	50	62	0	0	32	0	52	86	40	0	17	0	0	0	26	13	0	14	13	0	13	12
Bacteria_Firmicutes_Bacilli_Bacillales_Bacillaceae_Allobacillus	72	106	74	84	53	0	230	111	31	86	20	0	55	94	86	48	56	0	0	0	0	0	0	0	0	0	0	0	0	0	0	0	0	0	0	0	0	0	0	0	0	0	0	0	0	0	0	0	0
Bacteria_Firmicutes_Bacilli_Bacillales_Bacillaceae_Amphibacillus	0	0	0	0	0	0	0	0	0	0	0	0	0	0	0	0	0	0	0	0	38	42	47	0	0	0	0	0	36	0	0	0	34	47	75	0	0	0	0	0	20	0	0	0	0	0	0	0	0
Bacteria_Firmicutes_Bacilli_Bacillales_Bacillaceae_Anaerobacillus	38	0	46	0	0	53	0	0	0	0	0	0	0	0	0	0	0	0	0	0	77	73	217	68	0	0	65	105	137	0	0	0	65	86	159	128	88	49	31	0	29	21	37	30	0	0	47	27	35
Bacteria_Firmicutes_Bacilli_Bacillales_Bacillaceae_Anoxybacillus	2343	2434	2373	2162	2119	2313	2346	2550	1864	1653	1565	1762	1916	2261	2097	1931	1754	1324	3155	2310	2768	3769	3840	2444	3453	2472	2524	3131	4151	1656	2658	2097	2216	2904	3629	3174	1368	2033	1448	738	976	940	925	817	969	737	1651	1375	1029
Bacteria_Firmicutes_Bacilli_Bacillales_Bacillaceae_Aureibacillus	0	0	0	0	0	0	0	0	0	0	0	0	0	0	0	0	0	0	0	0	0	78	0	0	40	0	0	59	0	0	0	0	0	0	0	0	0	0	0	0	0	0	0	0	0	0	0	0	0
Bacteria_Firmicutes_Bacilli_Bacillales_Bacillaceae_Bacillus	46271	50668	50636	42959	56355	75069	39338	46544	36652	38470	58153	94350	41602	43052	45882	53899	47565	53452	57077	68842	182927	279716	491196	210177	60160	78781	121493	217910	320551	110989	46613	75951	170238	185787	411094	415743	15291	24006	22404	15430	16508	17474	15296	13604	16232	12822	18068	21114	17451
Bacteria_Firmicutes_Bacilli_Bacillales_Bacillaceae_Cerasibacillus	0	45	43	42	0	31	25	0	26	30	0	0	0	0	34	37	0	0	0	0	56	87	99	51	26	0	28	85	70	0	0	0	0	51	107	124	0	0	0	0	0	0	0	0	0	0	0	0	0
Bacteria_Firmicutes_Bacilli_Bacillales_Bacillaceae_Fictibacillus	230	463	151	142	153	170	300	339	152	106	165	139	197	320	116	144	93	138	99	129	377	580	861	520	105	139	205	466	756	351	61	95	267	414	703	636	23	88	141	85	120	95	117	62	110	34	74	139	92
Bacteria_Firmicutes_Bacilli_Bacillales_Bacillaceae_Geobacillus	1263	1440	1371	1351	1783	1719	1229	1288	1317	1398	1430	1726	1054	1105	1299	1326	2171	1402	888	1306	2855	4065	5405	3108	1109	1438	2472	3399	4898	1964	784	1373	2302	3610	4668	3664	1110	1177	1082	525	830	798	788	637	839	762	821	1097	695
Bacteria_Firmicutes_Bacilli_Bacillales_Bacillaceae_Gracilibacillus	327	452	430	439	677	606	318	416	412	393	538	396	292	377	428	366	459	530	234	344	412	438	370	216	309	405	403	510	478	291	152	312	352	527	396	368	242	253	279	118	193	188	167	122	108	130	189	176	214
Bacteria_Firmicutes_Bacilli_Bacillales_Bacillaceae_Halobacillus	452	445	291	303	326	320	311	344	363	340	245	271	359	316	286	220	266	210	348	269	600	699	870	365	362	325	376	700	790	135	530	335	630	510	955	800	89	123	98	70	105	101	135	136	240	73	97	106	84
Bacteria_Firmicutes_Bacilli_Bacillales_Bacillaceae_Halolactibacillus	220	205	0	0	0	0	162	84	59	0	0	0	140	130	0	0	0	0	103	58	101	219	287	210	154	114	0	118	230	0	115	84	0	134	367	167	29	0	0	0	0	0	0	0	0	0	0	0	0
Bacteria_Firmicutes_Bacilli_Bacillales_Bacillaceae_Lentibacillus	0	0	0	0	0	19	0	0	0	0	0	22	0	0	0	0	0	0	0	0	0	48	64	31	0	0	0	0	34	0	0	0	0	0	45	62	29	20	0	0	0	0	0	0	0	0	21	0	0
Bacteria_Firmicutes_Bacilli_Bacillales_Bacillaceae_Natronobacillus	0	0	0	0	43	53	0	0	0	0	39	57	0	0	0	0	0	54	0	0	46	41	76	201	0	0	0	36	63	77	0	0	41	100	152	46	0	0	0	0	0	0	0	0	0	0	0	0	0
Bacteria_Firmicutes_Bacilli_Bacillales_Bacillaceae_Oceanobacillus	399	376	221	182	256	332	228	306	173	181	205	460	312	406	252	231	246	225	126	273	756	1267	2775	1380	235	352	600	1014	2063	662	111	447	603	827	2254	2359	80	155	218	100	84	98	96	113	120	87	80	165	128
Bacteria_Firmicutes_Bacilli_Bacillales_Bacillaceae_Ornithinibacillus	205	291	274	196	292	454	143	293	186	216	264	361	133	255	241	220	267	371	105	165	327	439	688	310	138	219	342	447	556	263	83	170	318	501	585	418	49	28	46	16	53	39	31	45	56	60	23	38	22
Bacteria_Firmicutes_Bacilli_Bacillales_Bacillaceae_Paraliobacillus	29	28	30	24	26	50	0	34	29	48	30	0	38	27	25	30	63	0	0	0	0	41	0	80	0	0	36	58	49	0	0	0	30	54	43	0	33	44	40	18	27	45	15	25	35	19	38	32	35
Bacteria_Firmicutes_Bacilli_Bacillales_Bacillaceae_Paucisalibacillus	0	0	0	0	0	0	0	0	0	0	0	0	0	0	0	0	0	0	0	0	0	0	238	0	0	0	0	0	0	0	0	0	0	99	289	0	0	0	0	0	0	0	0	0	0	0	0	0	0
Bacteria_Firmicutes_Bacilli_Bacillales_Bacillaceae_Piscibacillus	0	0	0	0	0	0	0	0	0	0	0	0	0	0	0	0	0	0	0	0	0	0	34	0	0	0	0	0	0	0	0	0	0	0	0	0	0	0	0	0	0	0	0	0	0	0	0	0	0
Bacteria_Firmicutes_Bacilli_Bacillales_Bacillaceae_Pontibacillus	113	146	96	104	27	26	135	113	96	76	28	26	134	137	93	60	34	0	52	42	85	80	63	47	52	39	71	87	54	50	43	44	70	95	119	98	23	28	66	30	33	15	24	0	0	18	17	39	30
Bacteria_Firmicutes_Bacilli_Bacillales_Bacillaceae_Pseudogracilibacillus	0	0	23	0	0	0	0	0	0	20	0	56	0	0	0	0	23	0	0	20	103	138	262	205	33	21	49	79	179	146	0	36	82	88	207	330	0	0	0	0	0	0	0	0	0	0	0	0	0
Bacteria_Firmicutes_Bacilli_Bacillales_Bacillaceae_Salimicrobium	0	0	0	0	0	0	0	0	0	0	0	0	0	0	0	0	20	0	0	0	16	0	0	0	0	0	0	0	0	0	0	0	0	0	0	0	24	46	53	57	44	20	0	0	0	0	21	51	54
Bacteria_Firmicutes_Bacilli_Bacillales_Bacillaceae_Salinibacillus	0	0	0	0	0	0	0	0	0	0	0	0	0	0	0	0	0	0	0	0	36	41	0	0	0	0	0	37	0	37	0	0	54	0	33	0	0	0	0	0	0	0	0	0	0	0	0	0	0
Bacteria_Firmicutes_Bacilli_Bacillales_Bacillaceae_Salirhabdus	0	0	0	0	0	0	0	0	0	0	0	0	0	0	0	0	0	0	0	0	0	112	130	0	0	0	0	51	112	0	0	0	72	0	106	111	0	0	0	0	0	0	0	0	0	0	0	0	0
Bacteria_Firmicutes_Bacilli_Bacillales_Bacillaceae_Saliterribacillus	0	0	0	0	0	0	0	0	0	0	0	0	0	0	0	0	0	0	0	0	0	0	0	0	0	0	0	0	0	0	0	0	0	0	0	0	83	54	0	16	0	0	17	19	0	0	88	14	15
Bacteria_Firmicutes_Bacilli_Bacillales_Bacillaceae_Sediminibacillus	0	0	0	0	0	0	0	0	0	0	0	0	0	0	0	0	0	0	0	0	0	0	0	0	0	0	0	0	0	0	0	0	0	0	0	0	46	32	0	0	0	0	0	0	0	0	28	18	0
Bacteria_Firmicutes_Bacilli_Bacillales_Bacillaceae_Sinibacillus	0	0	0	0	0	0	0	0	0	0	0	0	0	0	0	0	0	0	0	0	70	80	53	0	0	39	37	38	51	0	0	0	49	60	0	0	0	0	0	0	0	0	0	0	0	0	0	0	0
Bacteria_Firmicutes_Bacilli_Bacillales_Bacillaceae_Tepidibacillus	46	73	0	0	0	0	32	0	28	0	0	0	33	69	0	0	0	0	0	34	0	45	0	0	41	0	0	0	0	0	0	0	0	0	0	0	0	44	62	24	32	35	35	32	55	46	34	36	43
Bacteria_Firmicutes_Bacilli_Bacillales_Bacillaceae_Terribacillus	0	0	0	0	0	0	0	0	0	0	0	0	0	0	0	0	0	0	0	0	0	0	0	0	29	0	0	0	0	0	29	0	37	0	0	0	28	32	0	0	16	16	0	16	25	18	26	17	0
Bacteria_Firmicutes_Bacilli_Bacillales_Bacillaceae_Thalassobacillus	0	0	0	0	0	0	0	0	0	0	0	0	0	0	0	0	0	0	0	0	0	0	91	0	0	0	0	0	0	0	0	0	0	0	96	0	0	0	0	0	0	0	0	0	0	0	0	0	0
Bacteria_Firmicutes_Bacilli_Bacillales_Bacillaceae_Thermolongibacillus	0	0	0	0	0	0	0	0	0	0	0	0	0	0	0	0	0	0	0	0	0	0	0	0	0	0	0	0	0	0	0	0	0	0	0	0	30	39	32	21	28	50	37	21	25	27	31	42	18
Bacteria_Firmicutes_Bacilli_Bacillales_Bacillaceae_Ureibacillus	324	275	405	226	315	606	209	295	171	137	303	693	267	226	337	133	288	302	426	517	2362	5443	2567	748	639	1076	1359	3242	2268	406	368	1216	1887	3064	1682	1310	121	142	178	87	112	88	89	94	118	101	120	122	106
Bacteria_Firmicutes_Bacilli_Bacillales_Bacillaceae_Virgibacillus	176	216	182	241	229	260	169	223	170	211	213	251	178	210	204	223	234	210	308	200	479	848	1130	831	201	233	363	625	1191	364	161	199	375	654	1018	848	297	460	473	227	381	266	335	209	160	205	199	424	301
Bacteria_Firmicutes_Bacilli_Bacillales_Bacillaceae_Vulcanibacillus	200	306	110	155	217	234	232	229	164	131	227	365	191	260	174	147	146	212	253	154	222	350	531	335	451	246	283	309	388	866	260	116	176	326	1207	375	111	471	117	69	114	103	89	45	39	31	272	227	126
Bacteria_Firmicutes_Bacilli_Bacillales_Bacillaceae_uncultured	283	282	119	108	95	107	207	233	114	98	111	155	207	274	112	76	134	85	196	137	333	479	706	371	164	108	182	326	511	185	204	98	245	352	605	744	137	173	118	65	117	102	69	44	97	59	126	101	89
Bacteria_Firmicutes_Bacilli_Bacillales_Marinococcaceae_Alteribacillus	0	64	96	116	413	101	0	57	112	198	224	56	28	36	106	120	314	66	497	615	401	391	184	227	432	348	552	339	340	36	527	476	351	291	105	111	0	20	18	0	0	12	0	0	0	0	14	15	24
Bacteria_Firmicutes_Bacilli_Bacillales_Marinococcaceae_Geomicrobium	0	25	0	0	0	0	0	0	0	0	0	0	0	0	0	17	0	0	0	0	0	0	0	0	0	0	0	0	0	0	0	0	0	0	0	0	0	0	0	0	0	0	0	26	0	0	0	0	0
Bacteria_Firmicutes_Bacilli_Bacillales_Marinococcaceae_Marinococcus	0	0	0	0	0	0	0	0	0	0	0	0	0	0	0	0	0	0	0	0	0	0	0	0	0	0	0	0	0	0	0	0	0	0	16	0	11	0	12	12	0	0	0	0	0	0	0	0	0
Bacteria_Firmicutes_Bacilli_Bacillales_Marinococcaceae_Natribacillus	337	258	69	76	0	0	306	162	61	64	0	0	251	199	80	84	0	0	65	65	51	39	24	52	62	47	29	27	54	34	59	48	23	76	33	0	46	41	33	22	20	22	30	39	24	23	21	32	10
Bacteria_Firmicutes_Bacilli_Bacillales_Marinococcaceae_Salibacterium	47	57	0	0	31	0	75	60	50	89	0	0	45	88	0	28	20	0	0	0	0	0	0	0	0	0	0	0	0	0	0	0	0	0	0	0	0	0	0	0	0	0	0	0	0	0	0	0	0
Bacteria_Firmicutes_Bacilli_Bacillales_Marinococcaceae_Salsuginibacillus	26	0	0	0	0	0	0	0	0	0	0	0	23	19	0	0	0	0	0	0	0	21	79	166	0	0	0	0	95	84	0	0	0	0	0	0	0	10	0	0	0	0	0	0	0	11	0	0	0
Bacteria_Firmicutes_Bacilli_Bacillales_Marinococcaceae_Sinobaca	0	0	0	0	0	0	0	0	0	0	0	0	0	0	0	0	0	0	0	0	0	0	0	0	0	0	0	0	0	0	0	0	21	0	0	0	0	0	0	0	0	0	0	0	0	0	0	0	0
Bacteria_Firmicutes_Bacilli_Bacillales_Planococcaceae_Bhargavaea	0	0	0	0	0	0	0	0	0	0	0	0	0	0	0	0	0	0	0	0	114	94	0	128	0	0	0	0	156	0	0	0	0	85	127	153	0	0	22	0	22	21	24	25	27	36	18	21	0
Bacteria_Firmicutes_Bacilli_Bacillales_Planococcaceae_Caryophanon	0	0	54	0	53	131	69	39	0	0	0	0	71	0	50	0	45	0	0	66	355	354	319	0	45	139	112	171	207	0	72	244	180	168	294	204	0	0	0	0	0	0	0	0	23	0	0	0	0
Bacteria_Firmicutes_Bacilli_Bacillales_Planococcaceae_Chryseomicrobium	217	239	210	204	213	312	136	223	251	219	224	188	147	198	281	225	176	234	1206	497	579	535	587	356	1147	622	562	445	613	321	798	443	309	400	306	326	44	54	60	26	72	48	57	46	35	76	36	36	56
Bacteria_Firmicutes_Bacilli_Bacillales_Planococcaceae_Chungangia	0	0	0	0	0	143	0	0	0	0	0	82	0	0	0	0	0	0	0	51	350	487	1182	400	0	74	183	327	795	150	0	106	135	284	974	1112	0	0	0	0	0	0	0	0	0	0	0	0	0
Bacteria_Firmicutes_Bacilli_Bacillales_Planococcaceae_Domibacillus	45	99	79	0	64	157	48	85	40	33	85	161	40	59	95	30	38	62	0	112	313	425	586	289	48	102	179	349	440	125	72	113	226	331	404	450	41	38	31	16	13	0	14	0	22	18	21	24	23
Bacteria_Firmicutes_Bacilli_Bacillales_Planococcaceae_Jeotgalibacillus	69	59	65	59	48	55	54	62	61	65	43	105	40	45	58	32	57	58	116	89	303	595	764	175	76	140	260	388	379	0	75	246	305	318	638	375	17	15	0	15	0	0	0	0	17	0	0	16	0
Bacteria_Firmicutes_Bacilli_Bacillales_Planococcaceae_Kurthia	1247	1393	1595	924	883	725	951	728	912	960	1164	1143	893	905	1171	7192	567	974	1087	1637	2440	1864	2485	1783	1162	1164	1058	1742	1787	899	990	1826	2487	1796	2153	1808	20	93	107	49	99	121	102	133	100	84	42	102	50
Bacteria_Firmicutes_Bacilli_Bacillales_Planococcaceae_Lysinibacillus	3042	2465	1968	1631	2154	2444	1906	2203	1478	1335	1732	2434	2537	2078	1882	1541	2101	1427	1622	2211	6871	11132	18106	8690	2448	3048	4263	8182	13492	4042	1237	3733	5764	6924	17635	18399	621	2126	2449	1004	1566	1560	673	494	551	440	1085	2368	1424
Bacteria_Firmicutes_Bacilli_Bacillales_Planococcaceae_Paenisporosarcina	66	80	77	99	0	62	0	51	0	0	0	103	56	0	76	52	0	0	0	0	151	277	308	183	0	64	76	183	251	0	0	97	121	160	417	562	18	0	0	0	0	0	22	77	93	48	0	0	0
Bacteria_Firmicutes_Bacilli_Bacillales_Planococcaceae_Planococcus	351	548	669	549	999	1176	467	600	621	516	1023	1301	330	391	577	304	952	844	580	740	1666	2853	4244	1991	1048	972	1526	2604	3329	1118	837	960	1333	1984	3434	3696	1013	3660	2096	649	1282	1374	1201	628	279	233	2132	1637	628
Bacteria_Firmicutes_Bacilli_Bacillales_Planococcaceae_Planomicrobium	530	574	589	586	603	504	419	443	600	409	382	448	417	414	430	398	436	359	430	438	986	1034	1399	828	336	398	688	876	1386	643	253	382	632	1006	1471	1022	389	428	505	245	363	269	267	305	282	296	375	452	372
Bacteria_Firmicutes_Bacilli_Bacillales_Planococcaceae_Psychrobacillus	241	179	346	187	341	574	148	243	309	250	384	645	186	180	266	170	285	304	163	473	1577	2452	4421	1556	424	587	720	1920	2593	566	173	719	1104	1374	3527	3212	24	25	40	42	46	57	79	64	100	67	32	55	37
Bacteria_Firmicutes_Bacilli_Bacillales_Planococcaceae_Rummeliibacillus	375	555	225	289	122	138	387	586	442	167	145	168	255	440	251	144	123	117	143	169	563	776	791	228	262	334	318	735	744	113	186	308	612	449	947	1098	902	399	253	143	409	361	354	36	28	19	329	259	204
Bacteria_Firmicutes_Bacilli_Bacillales_Planococcaceae_Savagea	0	0	0	0	0	0	0	0	0	0	0	0	0	0	0	0	0	0	29	0	30	39	60	29	37	21	0	39	48	23	42	20	0	28	47	44	0	0	0	0	0	11	0	0	0	0	0	0	0
Bacteria_Firmicutes_Bacilli_Bacillales_Planococcaceae_Solibacillus	1328	1262	406	248	249	403	1219	924	243	174	202	374	1583	940	392	346	288	228	494	571	1284	1491	2778	796	435	674	740	1242	1771	433	380	779	1150	1059	2338	1927	88	151	119	78	101	156	140	117	171	125	113	136	99
Bacteria_Firmicutes_Bacilli_Bacillales_Planococcaceae_Sporosarcina	993	878	1720	743	1932	3185	769	1249	729	685	2242	3549	963	662	1068	508	1641	2411	1091	1152	6130	10634	12573	5019	1565	2590	3397	8143	8410	2332	879	3110	4927	6958	11671	11923	105	305	230	183	213	290	263	213	342	238	175	259	155
Bacteria_Firmicutes_Bacilli_Bacillales_Planococcaceae_Viridibacillus	0	0	0	0	0	0	0	0	0	0	0	0	0	0	0	0	0	0	0	0	0	63	116	0	0	0	0	0	70	0	0	0	0	0	0	0	0	0	0	0	0	0	0	0	0	0	0	0	0
Bacteria_Firmicutes_Bacilli_Bacillales_Planococcaceae_[Renibacterium] salmoninarum group	0	0	0	0	0	43	0	0	0	0	0	30	0	0	0	0	0	0	0	0	31	45	81	0	0	0	0	30	74	0	0	0	0	0	31	0	0	0	0	0	0	0	0	0	0	0	0	0	0
Bacteria_Firmicutes_Bacilli_Bacillales_Planococcaceae_uncultured	184	232	306	195	219	331	153	192	159	104	166	466	174	223	198	144	147	201	225	302	730	989	2054	1065	332	318	500	990	1223	427	190	406	661	741	2593	2080	19	114	55	69	107	125	101	55	88	77	49	78	72
Bacteria_Firmicutes_Bacilli_Bacillales_Salisediminibacteriaceae_Alkalicoccus	0	67	91	155	203	513	22	65	178	101	467	825	0	66	87	106	170	553	34	151	66	113	548	224	64	81	192	150	296	261	41	54	86	206	769	295	27	132	222	177	117	104	36	20	28	17	86	101	107
Bacteria_Firmicutes_Bacilli_Bacillales_Salisediminibacteriaceae_Salipaludibacillus	39	66	78	66	201	306	46	44	37	54	347	198	29	39	66	28	54	208	32	63	144	246	284	140	41	52	101	203	233	0	0	77	164	197	194	195	15	24	23	0	25	16	20	14	29	15	0	33	12
Bacteria_Firmicutes_Bacilli_Bacillales_Salisediminibacteriaceae_Salisediminibacterium	0	0	0	0	0	0	0	0	0	0	0	0	0	0	0	0	0	0	0	28	0	24	0	0	0	0	23	0	26	0	23	0	0	0	0	0	0	26	10	21	20	0	0	0	0	0	0	0	0
Bacteria_Firmicutes_Bacilli_Bacillales_Salisediminibacteriaceae_Texcoconibacillus	0	0	0	0	0	0	0	0	0	0	0	0	0	0	0	0	0	0	0	0	0	0	0	0	0	0	0	0	0	0	0	0	0	0	0	0	0	0	0	0	20	33	19	0	0	0	0	0	0
Bacteria_Firmicutes_Bacilli_Bacillales_Sporolactobacillaceae_Pullulanibacillus	38	50	47	54	55	50	27	30	0	0	27	41	0	29	29	36	34	24	29	31	61	130	278	118	31	47	64	92	309	92	0	32	44	149	242	217	0	0	0	0	12	0	23	0	0	0	0	0	0
Bacteria_Firmicutes_Bacilli_Bacillales_Sporolactobacillaceae_Sporolactobacillus	348	136	52	55	44	42	168	100	70	54	100	72	266	121	49	120	31	49	40	47	119	74	80	42	44	66	61	58	69	41	30	44	98	92	77	71	0	18	11	0	12	0	0	0	0	0	0	0	11
Bacteria_Firmicutes_Bacilli_Bacillales_Sporolactobacillaceae_Terrilactibacillus	0	0	0	0	0	0	0	0	0	0	0	0	0	0	0	0	0	0	0	0	0	0	0	48	0	0	0	0	0	0	0	0	0	0	55	0	0	0	0	0	0	0	0	0	0	0	0	0	0
Bacteria_Firmicutes_Bacilli_Bacillales_Sporolactobacillaceae_Tuberibacillus	32	113	141	155	130	112	46	98	151	106	96	55	49	95	147	75	123	103	126	111	125	120	71	700	196	216	168	111	95	75	78	240	55	38	64	0	0	11	25	32	80	49	35	13	18	79	0	20	30
Bacteria_Firmicutes_Bacilli_Bacillales_Sporolactobacillaceae_uncultured	0	0	0	0	0	0	0	0	0	0	0	0	0	0	0	0	0	0	0	0	0	0	0	0	0	0	0	0	0	0	0	0	0	0	0	0	0	0	11	0	0	0	0	0	0	0	0	0	10
Bacteria_Firmicutes_Bacilli_Brevibacillales_Brevibacillaceae_Brevibacillus	549	697	482	584	462	375	517	600	587	533	341	374	501	526	539	786	387	344	1385	1346	1016	1025	1286	892	1746	1245	922	899	1021	489	1226	1009	744	656	1127	1156	553	986	1422	523	383	434	412	417	513	388	529	1033	826
Bacteria_Firmicutes_Bacilli_Caldalkalibacillales_Caldalkalibacillaceae_Caldalkalibacillus	105	243	44	24	0	20	156	249	59	0	0	0	114	241	51	37	0	0	0	35	78	54	45	0	24	36	28	51	28	0	21	37	48	51	24	0	0	0	0	0	0	0	0	0	13	12	0	0	0
Bacteria_Firmicutes_Bacilli_Desulfuribacillales_Desulfuribacillaceae_Desulfuribacillus	0	18	22	30	0	27	19	0	16	0	0	24	0	0	0	22	0	0	49	40	136	102	93	54	64	59	97	126	74	34	31	116	85	189	79	63	730	819	826	520	445	359	172	125	26	28	508	581	485
Bacteria_Firmicutes_Bacilli_Entomoplasmatales_Entomoplasmataceae_Candidatus Spiroplasma	32	38	0	27	23	17	45	0	25	31	16	18	52	22	34	21	37	30	57	33	56	46	30	43	72	48	61	49	37	46	92	21	26	62	53	0	0	0	0	0	0	0	0	0	0	0	0	0	0
Bacteria_Firmicutes_Bacilli_Entomoplasmatales_Entomoplasmataceae_Entomoplasma	104	117	75	119	57	0	80	96	141	102	37	0	79	85	68	84	0	19	0	21	45	19	0	0	29	0	41	26	0	0	0	0	17	0	0	0	0	10	0	17	18	21	0	0	0	0	0	15	14
Bacteria_Firmicutes_Bacilli_Entomoplasmatales_Entomoplasmataceae_Mesoplasma	119	120	141	109	58	59	87	106	95	76	42	51	105	106	151	417	68	31	19	64	69	68	102	111	54	33	68	89	67	24	41	33	49	66	47	30	43522	10321	3297	1997	3587	3827	4385	2993	3135	3306	23646	8132	3821
Bacteria_Firmicutes_Bacilli_Entomoplasmatales_Entomoplasmataceae_[Mycoplasma] group	76	64	34	42	0	40	46	54	36	44	20	34	60	44	33	116	46	27	271	260	138	83	66	24	221	130	103	71	61	37	256	179	100	73	52	52	95045	42214	7713	4638	5886	6953	7376	5457	6986	6628	71682	14141	11439
Bacteria_Firmicutes_Bacilli_Entomoplasmatales_Entomoplasmatales Incertae Sedis_Candidatus Hepatoplasma	1434	1599	421	445	174	143	1515	1294	779	275	254	174	1349	1072	482	386	281	182	402	478	400	350	123	80	249	392	524	337	348	73	446	482	324	186	115	114	244	510	416	241	388	328	361	273	257	229	294	359	281
Bacteria_Firmicutes_Bacilli_Entomoplasmatales_Entomoplasmatales Incertae Sedis_Candidatus Spiroplasma	0	0	0	0	0	0	0	0	0	0	0	0	0	0	0	0	0	0	0	0	0	0	0	0	0	0	0	0	0	0	0	0	0	0	0	0	99	56	96	86	53	45	50	29	28	19	49	69	75
Bacteria_Firmicutes_Bacilli_Entomoplasmatales_Spiroplasmataceae_Spiroplasma	373	315	215	260	339	523	362	247	228	222	546	599	326	270	301	298	387	518	834	958	518	459	284	370	1173	845	569	502	458	240	913	838	367	235	198	95	325	294	214	124	153	123	84	73	79	72	283	239	237
Bacteria_Firmicutes_Bacilli_Erysipelotrichales_Erysipelatoclostridiaceae_Asteroleplasma	179	299	181	138	225	143	176	180	131	131	149	62	126	303	137	117	135	113	45	45	70	64	92	81	66	46	65	69	66	52	66	44	54	73	52	69	28	94	147	46	76	70	86	86	124	79	46	109	77
Bacteria_Firmicutes_Bacilli_Erysipelotrichales_Erysipelatoclostridiaceae_Candidatus Stoquefichus	58	84	60	70	84	107	70	73	66	65	59	63	70	73	52	37	79	85	45	92	87	57	0	28	60	99	102	80	35	28	37	55	73	91	40	0	175	263	163	129	155	164	216	155	179	82	161	164	124
Bacteria_Firmicutes_Bacilli_Erysipelotrichales_Erysipelatoclostridiaceae_Catenibacterium	191	205	156	214	132	121	178	186	172	145	122	93	174	167	137	174	132	97	138	182	113	115	166	225	122	132	135	127	165	276	98	119	97	179	227	127	107	146	151	62	83	102	72	94	95	91	115	125	116
Bacteria_Firmicutes_Bacilli_Erysipelotrichales_Erysipelatoclostridiaceae_Eggerthia	0	0	0	0	0	0	0	0	0	0	0	0	0	0	0	0	0	0	0	0	0	0	0	0	0	0	0	0	0	0	0	0	0	0	0	0	0	0	0	0	0	0	0	0	0	0	0	0	0
Bacteria_Firmicutes_Bacilli_Erysipelotrichales_Erysipelatoclostridiaceae_Erysipelatoclostridium	186	317	169	269	225	250	202	284	259	180	222	334	160	232	243	209	132	236	191	232	250	270	448	139	176	188	228	200	252	132	222	142	253	277	378	97	192	426	411	743	231	179	151	252	154	116	199	344	395
Bacteria_Firmicutes_Bacilli_Erysipelotrichales_Erysipelatoclostridiaceae_Erysipelotrichaceae UCG-002	24	41	0	23	0	0	25	38	0	0	28	0	0	0	29	43	28	0	0	0	0	0	0	0	0	0	0	0	0	0	0	0	0	0	0	0	23	30	0	0	16	25	23	62	69	57	0	14	0
Bacteria_Firmicutes_Bacilli_Erysipelotrichales_Erysipelatoclostridiaceae_Erysipelotrichaceae UCG-003	314	385	218	244	207	177	250	262	237	263	246	390	226	346	228	204	196	139	132	102	105	130	447	309	177	164	155	115	214	252	122	118	158	109	294	257	100	147	120	72	103	110	80	129	99	72	97	149	110
Bacteria_Firmicutes_Bacilli_Erysipelotrichales_Erysipelatoclostridiaceae_Sharpea	0	21	20	19	0	0	19	18	25	16	0	0	19	33	26	27	15	0	52	20	0	0	0	0	23	0	0	0	0	0	29	21	0	0	0	0	0	42	24	18	13	15	29	11	0	0	21	57	16
Bacteria_Firmicutes_Bacilli_Erysipelotrichales_Erysipelatoclostridiaceae_UCG-004	2482	2417	652	777	800	713	2197	1467	819	656	633	777	1942	1790	821	811	503	688	1474	1261	958	955	935	835	1153	901	888	733	1156	868	1772	953	899	865	1027	1213	2462	1321	959	641	662	726	783	594	656	330	1292	979	761
Bacteria_Firmicutes_Bacilli_Erysipelotrichales_Erysipelatoclostridiaceae_uncultured	651	1021	842	1048	620	497	705	951	1080	735	404	289	480	866	783	649	514	564	419	528	422	494	480	407	602	449	531	424	430	407	437	442	400	598	423	207	233	220	249	211	157	135	96	89	77	42	138	173	181
Bacteria_Firmicutes_Bacilli_Erysipelotrichales_Erysipelotrichaceae_Allobaculum	0	29	30	33	27	22	20	29	24	24	35	79	0	22	38	41	32	28	44	44	53	29	0	0	60	78	31	70	0	0	0	29	50	35	0	0	0	0	0	0	0	0	0	0	0	0	0	0	0
Bacteria_Firmicutes_Bacilli_Erysipelotrichales_Erysipelotrichaceae_Breznakia	155	243	198	197	64	23	200	210	178	112	64	19	140	204	162	254	85	40	23	17	21	0	0	0	43	45	30	22	0	0	51	18	0	0	0	0	30	37	58	31	21	21	34	45	31	0	18	35	48
Bacteria_Firmicutes_Bacilli_Erysipelotrichales_Erysipelotrichaceae_Bulleidia	0	27	0	0	0	0	0	0	17	0	0	0	0	21	0	0	0	0	0	21	0	19	0	0	25	0	0	0	0	0	21	23	0	0	0	0	0	0	0	0	0	0	0	0	0	0	0	0	0
Bacteria_Firmicutes_Bacilli_Erysipelotrichales_Erysipelotrichaceae_Catenisphaera	151	135	73	62	0	0	130	96	74	29	0	0	126	103	50	54	37	0	70	68	25	0	0	0	129	64	31	0	26	38	110	30	0	0	0	0	85	80	16	20	27	35	62	43	54	36	42	39	15
Bacteria_Firmicutes_Bacilli_Erysipelotrichales_Erysipelotrichaceae_Dielma	111	88	35	37	17	21	67	77	38	0	0	40	50	55	24	0	23	0	41	55	109	120	80	47	44	38	67	90	58	107	20	29	46	118	71	46	99	76	115	65	184	232	236	80	65	83	37	81	80
Bacteria_Firmicutes_Bacilli_Erysipelotrichales_Erysipelotrichaceae_Dubosiella	166	303	98	162	61	81	298	270	159	105	110	59	134	335	158	170	74	0	66	89	89	73	195	91	71	75	64	86	109	62	64	0	63	92	230	181	268	232	80	61	28	54	38	91	36	29	229	61	88
Bacteria_Firmicutes_Bacilli_Erysipelotrichales_Erysipelotrichaceae_Erysipelothrix	451	477	403	464	378	295	410	418	440	390	359	382	382	443	580	414	338	297	625	599	674	749	772	623	569	535	809	675	675	894	613	431	808	748	862	755	1113	2255	2419	1393	1203	1360	1894	6119	2173	447	1342	1676	1629
Bacteria_Firmicutes_Bacilli_Erysipelotrichales_Erysipelotrichaceae_Erysipelotrichaceae UCG-006	20	17	0	0	0	0	0	0	0	0	0	0	0	0	0	0	0	0	0	0	0	0	0	0	0	0	0	0	0	0	0	0	0	0	0	0	0	86	75	54	120	61	42	14	12	0	45	92	60
Bacteria_Firmicutes_Bacilli_Erysipelotrichales_Erysipelotrichaceae_Erysipelotrichaceae UCG-007	0	0	0	20	0	0	0	19	19	19	0	0	0	18	0	0	21	25	0	0	0	23	0	0	0	0	0	0	0	0	0	0	0	0	0	0	21	0	13	39	0	11	0	0	0	0	0	0	0
Bacteria_Firmicutes_Bacilli_Erysipelotrichales_Erysipelotrichaceae_Erysipelotrichaceae UCG-008	0	0	0	0	0	0	0	0	0	0	0	0	0	0	0	0	0	0	0	0	0	0	0	0	0	0	0	0	0	0	0	0	0	0	0	0	0	0	0	64	0	0	0	0	0	0	0	0	0
Bacteria_Firmicutes_Bacilli_Erysipelotrichales_Erysipelotrichaceae_Erysipelotrichaceae UCG-009	54	68	0	17	0	0	38	41	0	22	0	0	47	34	0	0	0	0	0	27	40	42	80	20	0	0	0	27	0	0	0	0	20	53	24	0	0	34	32	26	25	18	20	17	0	0	26	19	21
Bacteria_Firmicutes_Bacilli_Erysipelotrichales_Erysipelotrichaceae_Faecalibaculum	680	692	371	522	503	463	484	585	488	479	592	874	648	540	445	663	405	486	523	483	802	808	1814	395	524	477	688	717	926	442	526	388	770	780	612	633	404	356	400	271	305	353	302	355	298	290	319	338	269
Bacteria_Firmicutes_Bacilli_Erysipelotrichales_Erysipelotrichaceae_Faecalicoccus	0	0	0	0	0	0	0	0	0	0	0	0	0	0	0	0	0	0	0	0	0	0	0	0	0	0	0	0	0	0	0	0	0	0	0	0	0	0	19	0	0	0	0	0	0	0	0	15	0
Bacteria_Firmicutes_Bacilli_Erysipelotrichales_Erysipelotrichaceae_Faecalitalea	296	355	152	172	236	185	248	252	183	213	249	130	284	344	146	140	291	145	82	162	119	136	180	270	152	127	138	141	197	281	77	91	146	260	165	163	224	318	227	150	174	232	162	128	194	167	222	295	154
Bacteria_Firmicutes_Bacilli_Erysipelotrichales_Erysipelotrichaceae_Holdemanella	321	382	196	282	293	203	296	260	284	249	240	252	252	318	265	281	192	264	303	380	225	219	263	223	280	237	229	176	155	213	372	288	228	186	213	178	981	608	578	730	644	599	576	411	395	407	488	462	491
Bacteria_Firmicutes_Bacilli_Erysipelotrichales_Erysipelotrichaceae_Holdemania	0	0	0	0	0	0	0	0	0	0	16	0	0	0	0	0	0	0	30	0	0	0	0	0	0	0	0	0	0	0	70	0	0	0	0	0	0	0	0	0	0	0	0	0	0	0	0	0	0
Bacteria_Firmicutes_Bacilli_Erysipelotrichales_Erysipelotrichaceae_Ileibacterium	15	0	0	0	0	0	0	0	0	0	0	0	0	0	0	0	0	0	0	0	0	0	0	0	0	0	0	0	0	0	0	0	0	0	0	0	0	0	0	0	0	0	0	0	0	0	0	0	0
Bacteria_Firmicutes_Bacilli_Erysipelotrichales_Erysipelotrichaceae_Merdibacter	0	0	0	0	0	0	0	0	0	0	0	0	0	0	0	0	0	0	0	0	0	0	0	0	0	0	0	0	0	0	0	0	0	0	0	0	0	0	0	0	0	0	11	0	23	0	0	0	0
Bacteria_Firmicutes_Bacilli_Erysipelotrichales_Erysipelotrichaceae_Solobacterium	376	509	193	227	232	178	392	354	219	261	187	136	239	308	155	272	205	187	198	227	193	206	174	199	218	216	226	192	247	203	257	145	166	264	179	174	319	242	134	103	82	84	80	90	91	49	195	181	136
Bacteria_Firmicutes_Bacilli_Erysipelotrichales_Erysipelotrichaceae_Turicibacter	944	1513	775	734	802	705	1097	1470	832	686	706	780	844	1397	812	605	641	643	1728	1307	2382	2949	1027	440	1181	1356	1493	2137	1085	418	1779	1540	2623	2156	760	469	1062	1354	738	275	303	329	271	233	219	192	948	744	470
Bacteria_Firmicutes_Bacilli_Erysipelotrichales_Erysipelotrichaceae_ZOR0006	667	709	490	480	734	719	478	521	381	352	557	881	567	586	820	500	363	591	422	337	386	356	206	125	452	291	338	329	246	103	612	217	287	292	165	106	215	260	284	200	208	270	209	442	217	168	192	245	287
Bacteria_Firmicutes_Bacilli_Erysipelotrichales_Erysipelotrichaceae_[Anaerorhabdus] furcosa group	158	247	69	81	40	42	232	215	77	59	34	71	135	253	90	115	38	19	97	158	87	98	229	174	106	177	47	58	100	72	86	117	78	82	351	102	104	273	288	682	210	302	394	348	332	269	148	163	224
Bacteria_Firmicutes_Bacilli_Erysipelotrichales_Erysipelotrichaceae_[Clostridium] innocuum group	663	308	88	108	243	74	420	298	154	77	66	51	678	193	91	107	67	76	70	113	74	90	210	676	102	81	108	89	356	777	162	84	71	117	122	154	223	129	108	52	75	92	68	64	63	58	117	111	100
Bacteria_Firmicutes_Bacilli_Erysipelotrichales_Erysipelotrichaceae_uncultured	1082	3220	620	755	210	151	2009	2145	1049	458	159	117	928	3146	710	455	174	119	944	594	433	327	179	165	1392	687	762	325	331	175	2286	531	276	234	157	101	870	897	680	1145	384	364	318	455	316	226	981	588	501
Bacteria_Firmicutes_Bacilli_Exiguobacterales_Exiguobacteraceae_Exiguobacterium	585	726	613	715	588	621	562	713	585	518	670	737	494	568	586	630	622	544	779	761	1427	1885	3115	1142	744	711	951	1532	1607	854	820	1043	1168	1556	2720	1260	232	409	402	305	404	389	431	282	319	216	242	414	290
Bacteria_Firmicutes_Bacilli_Haloplasmatales_Haloplasmataceae_Haloplasma	146	187	146	99	87	102	112	115	119	103	93	134	98	250	134	112	112	63	554	245	167	160	93	47	289	187	132	131	109	70	661	150	97	92	106	30	239	190	129	67	68	64	102	142	116	51	111	120	75
Bacteria_Firmicutes_Bacilli_Izemoplasmatales_Izemoplasmataceae_Izimaplasma	558	332	133	173	138	169	399	299	272	145	87	119	372	594	171	163	191	112	4082	1348	906	968	501	391	4227	1270	929	370	929	805	11109	856	338	206	259	198	6840	18099	14666	11400	14896	12405	8969	5708	6020	3995	9828	12497	14993
Bacteria_Firmicutes_Bacilli_Kyrpidiales_Kyrpidiaceae_Kyrpidia	105	169	29	43	63	23	123	134	44	41	50	75	66	134	48	66	43	20	0	33	51	53	23	0	0	31	44	75	54	29	0	17	32	125	0	0	23	29	24	21	13	17	24	75	41	0	23	22	18
Bacteria_Firmicutes_Bacilli_Lactobacillales_Aerococcaceae_Abiotrophia	27	61	35	41	0	0	29	48	46	49	44	0	22	46	37	48	0	26	0	26	29	27	37	54	40	36	27	27	54	25	38	0	28	28	110	36	29	37	40	22	18	23	27	36	33	34	39	31	18
Bacteria_Firmicutes_Bacilli_Lactobacillales_Aerococcaceae_Aerococcus	550	401	179	136	141	190	286	288	223	109	160	188	383	218	162	180	100	172	165	209	210	257	193	222	200	177	147	221	188	293	176	232	181	199	218	160	158	189	219	116	153	170	152	108	115	172	150	194	155
Bacteria_Firmicutes_Bacilli_Lactobacillales_Aerococcaceae_Eremococcus	0	0	0	0	0	0	0	0	0	0	0	0	0	0	0	0	0	0	0	0	0	0	0	0	0	0	0	0	0	0	0	0	0	0	0	0	0	0	0	0	0	0	0	0	0	0	0	0	0
Bacteria_Firmicutes_Bacilli_Lactobacillales_Aerococcaceae_Facklamia	74	55	22	25	0	63	35	41	27	32	50	45	53	47	0	36	0	67	55	33	0	42	27	36	45	47	32	29	29	24	60	55	46	81	31	0	14	43	28	0	15	0	0	15	0	19	41	29	13
Bacteria_Firmicutes_Bacilli_Lactobacillales_Aerococcaceae_Globicatella	23	0	0	0	26	0	0	21	0	0	0	0	0	0	0	0	0	0	0	0	0	35	28	0	0	26	0	27	20	0	0	0	0	36	35	0	28	65	67	101	53	13	41	13	0	0	32	21	39
Bacteria_Firmicutes_Bacilli_Lactobacillales_Aerococcaceae_Ignavigranum	75	109	100	116	95	121	92	93	94	124	108	109	77	84	99	100	141	156	419	407	236	212	143	247	165	98	142	111	189	157	591	277	125	166	43	0	20	0	19	11	19	35	28	21	11	0	0	0	14
Bacteria_Firmicutes_Bacilli_Lactobacillales_Aerococcaceae_uncultured	0	26	0	0	87	53	0	0	0	45	90	58	0	40	0	0	66	0	42	29	61	28	24	0	25	0	51	36	21	0	0	30	39	58	0	0	0	0	0	0	0	0	0	0	0	0	0	0	0
Bacteria_Firmicutes_Bacilli_Lactobacillales_Carnobacteriaceae_Alkalibacterium	51	64	39	41	51	0	32	45	55	43	43	61	36	39	47	50	37	27	52	66	56	24	37	64	74	55	39	0	35	25	156	56	34	46	34	0	0	48	50	30	21	31	42	22	21	20	32	35	33
Bacteria_Firmicutes_Bacilli_Lactobacillales_Carnobacteriaceae_Alloiococcus	57	100	48	40	95	41	41	48	56	41	72	50	48	96	43	53	100	32	57	54	45	51	46	48	60	26	22	34	32	23	66	31	48	40	40	20	245	129	113	49	86	88	90	54	68	60	132	125	78
Bacteria_Firmicutes_Bacilli_Lactobacillales_Carnobacteriaceae_Atopococcus	87	67	0	0	0	0	0	0	0	0	0	0	0	0	0	0	0	0	0	0	0	0	0	0	0	0	0	0	0	0	0	0	0	0	0	0	0	0	0	0	0	0	0	0	0	0	0	0	0
Bacteria_Firmicutes_Bacilli_Lactobacillales_Carnobacteriaceae_Atopostipes	74	91	98	81	34	37	76	72	66	77	67	130	86	69	70	90	0	53	245	186	112	84	96	38	157	130	72	91	87	30	136	113	98	84	46	50	62	126	136	39	53	54	38	62	88	130	63	87	59
Bacteria_Firmicutes_Bacilli_Lactobacillales_Carnobacteriaceae_Carnobacterium	80	90	57	103	65	83	91	83	71	46	0	71	0	73	50	72	41	94	113	150	150	153	124	59	146	105	103	143	69	0	98	100	149	123	135	65	42	97	119	83	104	109	112	138	181	195	38	93	68
Bacteria_Firmicutes_Bacilli_Lactobacillales_Carnobacteriaceae_Desemzia	0	40	0	0	0	0	0	0	0	0	0	0	0	0	0	0	0	0	0	0	0	55	0	54	0	0	0	45	50	0	0	0	0	0	0	94	0	0	16	0	0	0	0	0	0	0	0	0	15
Bacteria_Firmicutes_Bacilli_Lactobacillales_Carnobacteriaceae_Dolosigranulum	246	278	142	230	170	151	224	254	251	154	143	137	158	254	182	239	203	117	271	201	159	154	157	109	230	204	153	116	156	119	171	209	118	130	168	68	145	187	140	98	134	135	133	110	148	122	146	190	123
Bacteria_Firmicutes_Bacilli_Lactobacillales_Carnobacteriaceae_Granulicatella	217	235	147	141	173	119	149	181	169	189	137	124	164	179	143	151	105	89	490	198	298	316	310	170	193	110	143	177	243	138	1508	148	166	131	210	254	189	172	162	83	173	153	117	87	77	82	131	138	85
Bacteria_Firmicutes_Bacilli_Lactobacillales_Carnobacteriaceae_Isobaculum	0	0	0	0	0	0	0	0	0	0	0	0	0	0	0	0	0	0	0	0	0	0	62	0	0	0	0	0	0	0	0	0	0	0	0	0	0	0	0	0	0	0	0	0	0	0	0	0	0
Bacteria_Firmicutes_Bacilli_Lactobacillales_Carnobacteriaceae_Jeotgalibaca	180	120	62	65	33	72	140	83	45	28	32	68	94	114	65	71	46	35	30	50	104	229	210	154	47	53	95	132	260	79	30	50	73	155	289	149	27	100	113	94	101	82	52	22	46	27	57	141	115
Bacteria_Firmicutes_Bacilli_Lactobacillales_Carnobacteriaceae_Marinilactibacillus	0	0	0	0	0	0	0	0	0	0	0	0	30	39	0	0	0	0	41	0	0	23	0	0	48	39	0	0	0	0	0	0	0	0	0	0	43	78	21	0	0	0	0	0	0	0	64	32	36
Bacteria_Firmicutes_Bacilli_Lactobacillales_Carnobacteriaceae_Trichococcus	41	101	64	0	83	60	75	135	54	62	66	115	0	118	57	0	65	68	0	0	0	61	182	103	0	0	56	70	72	0	0	0	0	57	231	115	47	46	50	24	28	36	23	0	32	0	28	34	22
Bacteria_Firmicutes_Bacilli_Lactobacillales_Carnobacteriaceae_uncultured	192	94	60	68	36	56	94	97	51	41	47	72	121	46	53	53	28	32	36	41	152	278	603	266	69	63	91	179	424	183	31	60	132	134	415	552	20	71	113	59	70	37	30	18	41	29	42	77	67
Bacteria_Firmicutes_Bacilli_Lactobacillales_Catellicoccaceae_Catellicoccus	43	39	0	0	0	0	0	0	0	0	0	0	0	0	0	0	0	0	92	0	27	24	0	0	33	0	0	0	0	0	161	79	0	23	0	29	0	0	0	0	0	0	12	0	0	0	0	0	0
Bacteria_Firmicutes_Bacilli_Lactobacillales_Enterococcaceae_Enterococcus	5401	7817	6210	5958	5378	4908	6080	5844	4544	5170	5370	4576	4453	6932	4918	11620	4003	4602	7016	7186	6417	6312	6409	2992	7554	5997	5160	6041	5075	2983	8247	5478	6638	4783	4791	4063	1697	2093	1646	883	1211	1135	1146	1328	1025	857	1569	1575	1064
Bacteria_Firmicutes_Bacilli_Lactobacillales_Enterococcaceae_Melissococcus	0	23	0	0	0	0	0	0	0	0	0	0	26	30	0	0	0	0	0	0	0	0	0	0	0	0	0	0	0	0	0	0	0	0	0	0	0	0	0	0	0	0	0	0	0	0	0	0	0
Bacteria_Firmicutes_Bacilli_Lactobacillales_Enterococcaceae_Tetragenococcus	0	20	0	0	23	0	0	17	0	0	0	0	0	0	0	22	21	0	19	0	0	0	19	0	0	34	0	0	29	0	0	18	0	0	57	0	10	28	27	19	30	21	22	0	28	27	18	32	20
Bacteria_Firmicutes_Bacilli_Lactobacillales_Lactobacillaceae_Amylolactobacillus	31	77	66	105	139	130	17	42	97	92	269	250	17	84	71	80	84	97	61	68	410	573	557	273	46	53	525	393	327	115	60	75	660	834	435	131	0	12	27	0	11	0	0	0	0	0	0	22	15
Bacteria_Firmicutes_Bacilli_Lactobacillales_Lactobacillaceae_Apilactobacillus	59	124	152	226	631	966	75	106	274	366	830	564	72	64	197	186	735	1385	28	47	145	171	175	95	25	42	110	138	62	36	26	0	179	183	117	0	31	37	36	23	36	24	23	29	37	28	27	35	28
Bacteria_Firmicutes_Bacilli_Lactobacillales_Lactobacillaceae_Bombilactobacillus	30	49	0	0	0	41	37	21	24	19	0	0	23	36	17	0	0	0	0	19	23	24	0	0	35	23	34	17	0	0	31	0	24	0	0	0	22	22	0	0	0	0	0	0	0	0	21	11	0
Bacteria_Firmicutes_Bacilli_Lactobacillales_Lactobacillaceae_Companilactobacillus	35	38	35	44	48	50	36	45	49	30	43	73	0	39	27	36	31	32	72	144	239	293	188	125	97	100	279	264	221	236	86	85	345	391	155	115	185	134	91	33	110	130	85	30	35	25	79	86	62
Bacteria_Firmicutes_Bacilli_Lactobacillales_Lactobacillaceae_Fructilactobacillus	53	113	27	30	24	0	96	112	28	0	0	0	59	101	16	0	16	0	0	0	0	26	40	0	0	0	20	20	27	0	0	0	0	0	0	0	44	39	27	35	46	42	81	104	200	63	43	33	32
Bacteria_Firmicutes_Bacilli_Lactobacillales_Lactobacillaceae_Fructobacillus	75	221	24	49	25	0	97	148	80	48	20	0	71	263	39	46	50	0	58	83	17	17	0	0	121	82	34	20	31	0	64	31	0	0	0	0	15	22	42	0	17	14	30	19	0	0	13	18	24
Bacteria_Firmicutes_Bacilli_Lactobacillales_Lactobacillaceae_Furfurilactobacillus	0	0	0	0	18	31	0	0	0	0	36	0	0	0	0	0	0	33	0	0	0	0	0	0	0	0	0	0	0	0	0	0	0	0	0	0	0	0	0	0	0	0	0	0	0	0	0	0	0
Bacteria_Firmicutes_Bacilli_Lactobacillales_Lactobacillaceae_HT002	0	0	95	0	0	0	0	109	0	0	0	0	0	0	0	0	0	0	0	0	0	0	0	0	0	0	99	0	0	0	173	0	0	0	0	0	0	0	0	0	0	0	0	0	0	0	0	0	0
Bacteria_Firmicutes_Bacilli_Lactobacillales_Lactobacillaceae_Holzapfelia	0	25	38	77	57	30	28	55	84	74	0	0	0	22	23	58	0	0	0	0	0	60	59	41	0	0	0	0	30	0	0	0	0	34	81	150	29	26	0	0	0	0	0	0	0	0	16	0	0
Bacteria_Firmicutes_Bacilli_Lactobacillales_Lactobacillaceae_Lacticaseibacillus	1263	1452	1270	1144	1157	957	1127	1229	1035	992	1315	881	1176	1092	1059	6467	1570	746	660	909	1730	1374	1127	821	934	903	1051	1254	1150	631	554	694	1328	1241	1096	860	32868	101329	100063	60299	84693	87613	86765	100761	76831	57628	52580	101743	72212
Bacteria_Firmicutes_Bacilli_Lactobacillales_Lactobacillaceae_Lactiplantibacillus	947	1096	930	983	1019	853	854	872	883	895	1038	619	778	978	836	1494	774	636	712	811	925	1016	1512	1418	836	812	733	869	960	3275	661	583	807	1088	1147	1018	366	408	324	215	261	253	244	412	554	853	274	314	220
Bacteria_Firmicutes_Bacilli_Lactobacillales_Lactobacillaceae_Lactobacillus	3153	2802	1781	2171	2328	1749	2478	2251	2264	2021	2127	1539	2486	2362	1828	2029	2285	1581	2843	2378	1921	1769	2116	2004	3136	2129	1447	1577	1502	1796	2087	1802	1960	1551	2055	1390	1883	1918	1836	1212	1621	1648	1418	1504	1700	1884	1433	1682	1378
Bacteria_Firmicutes_Bacilli_Lactobacillales_Lactobacillaceae_Latilactobacillus	328	309	147	225	292	131	274	360	192	310	220	296	176	317	264	318	159	254	747	472	475	585	532	276	811	677	562	455	731	136	1185	328	641	320	490	374	172	140	135	91	119	151	136	104	275	238	69	142	121
Bacteria_Firmicutes_Bacilli_Lactobacillales_Lactobacillaceae_Lentilactobacillus	186	261	209	235	352	306	195	271	197	239	238	218	164	183	197	128	168	178	124	154	144	175	310	240	152	144	274	203	224	319	86	103	154	250	315	135	268	256	219	125	126	135	140	95	67	105	193	212	147
Bacteria_Firmicutes_Bacilli_Lactobacillales_Lactobacillaceae_Leuconostoc	460	501	395	445	531	509	413	490	448	405	471	342	396	516	373	507	452	342	404	563	464	548	453	417	516	456	546	523	429	372	601	429	501	694	399	234	226	533	474	275	457	456	500	401	515	359	316	434	339
Bacteria_Firmicutes_Bacilli_Lactobacillales_Lactobacillaceae_Levilactobacillus	118	130	98	108	97	84	96	98	127	92	67	58	77	90	83	130	87	44	157	231	227	165	136	85	222	220	241	234	168	79	190	182	214	158	107	115	59	108	117	76	112	107	105	89	74	70	82	112	68
Bacteria_Firmicutes_Bacilli_Lactobacillales_Lactobacillaceae_Ligilactobacillus	788	804	374	476	406	292	640	545	463	387	332	301	480	669	415	402	377	300	386	400	544	524	771	897	468	464	456	505	1116	1344	442	551	496	542	781	1250	334	535	425	226	262	312	315	296	311	237	401	460	279
Bacteria_Firmicutes_Bacilli_Lactobacillales_Lactobacillaceae_Limosilactobacillus	2185	1874	1330	1556	2256	1637	1595	1971	1711	1841	2909	1671	1738	1592	1622	1961	2337	1623	1356	1111	1372	1242	1639	840	1866	1547	1802	1509	1491	781	1734	973	976	1299	1109	1041	3538	2193	705	467	606	449	388	350	483	309	2030	895	664
Bacteria_Firmicutes_Bacilli_Lactobacillales_Lactobacillaceae_Liquorilactobacillus	20	40	28	50	44	22	31	41	23	33	0	0	23	45	33	54	26	22	25	52	32	40	28	0	28	27	24	27	0	19	18	26	24	34	18	0	11	45	58	22	20	35	10	16	0	0	22	46	48
Bacteria_Firmicutes_Bacilli_Lactobacillales_Lactobacillaceae_Loigolactobacillus	0	0	85	32	0	0	0	0	48	29	0	0	0	0	0	54	0	0	37	63	283	280	117	35	56	62	240	350	126	41	0	51	227	493	98	39	0	12	0	0	0	0	0	0	0	0	0	0	0
Bacteria_Firmicutes_Bacilli_Lactobacillales_Lactobacillaceae_Oenococcus	0	0	0	0	0	0	0	0	18	0	0	15	37	0	0	0	0	0	0	0	0	0	15	0	0	0	0	17	0	0	0	0	0	0	0	0	10	28	60	36	35	37	33	45	66	51	15	36	26
Bacteria_Firmicutes_Bacilli_Lactobacillales_Lactobacillaceae_Paucilactobacillus	0	0	0	0	0	0	0	0	0	0	0	0	0	38	0	0	0	0	0	0	0	0	0	0	0	0	0	0	0	0	0	0	0	0	0	0	0	0	0	0	11	0	0	0	0	0	0	0	0
Bacteria_Firmicutes_Bacilli_Lactobacillales_Lactobacillaceae_Pediococcus	91	113	93	86	102	80	73	67	107	111	85	113	84	90	89	102	131	49	113	149	239	280	169	146	150	119	242	304	219	156	69	120	155	249	227	123	71	71	55	62	81	56	63	176	135	75	52	58	52
Bacteria_Firmicutes_Bacilli_Lactobacillales_Lactobacillaceae_Schleiferilactobacillus	711	153	27	28	0	0	138	83	43	29	0	0	234	104	50	0	27	0	0	22	0	0	17	0	80	52	0	0	0	0	17	0	0	0	0	0	17	12	0	0	0	0	0	0	0	0	0	0	0
Bacteria_Firmicutes_Bacilli_Lactobacillales_Lactobacillaceae_Secundilactobacillus	0	0	0	0	0	0	0	0	0	0	0	0	0	0	0	0	0	0	0	0	0	0	378	485	0	0	0	0	109	421	0	0	0	0	189	466	0	0	0	0	0	0	0	15	12	0	0	0	0
Bacteria_Firmicutes_Bacilli_Lactobacillales_Lactobacillaceae_Weissella	116	220	116	128	157	174	152	173	166	124	144	171	104	180	126	146	134	106	101	109	136	150	165	77	115	96	112	141	99	30	124	84	150	105	155	145	136	356	290	99	99	84	74	67	64	62	204	269	153
Bacteria_Firmicutes_Bacilli_Lactobacillales_Lactobacillaceae_uncultured	58	45	0	0	0	38	38	39	0	0	0	0	0	45	0	0	0	0	42	0	0	0	0	0	0	0	32	0	0	0	0	0	44	42	0	0	0	0	21	0	24	0	24	0	19	26	0	19	0
Bacteria_Firmicutes_Bacilli_Lactobacillales_Listeriaceae_Brochothrix	0	0	0	0	0	0	0	0	0	0	0	0	0	0	0	24	26	0	0	0	0	31	51	0	27	0	0	27	34	0	0	0	0	35	45	56	40	42	64	39	62	41	33	33	26	18	40	25	37
Bacteria_Firmicutes_Bacilli_Lactobacillales_Listeriaceae_Listeria	150	168	152	136	131	112	141	151	147	101	106	86	113	180	186	130	101	95	93	118	164	235	247	130	126	99	142	189	192	94	93	115	147	201	274	245	82	78	73	44	53	44	38	17	39	29	66	74	43
Bacteria_Firmicutes_Bacilli_Lactobacillales_Streptococcaceae_Floricoccus	0	0	0	0	0	0	0	0	0	0	0	0	0	0	0	0	0	0	0	0	25	40	0	0	0	38	50	50	19	0	0	18	41	52	0	0	89	90	89	40	138	133	133	87	112	68	88	61	57
Bacteria_Firmicutes_Bacilli_Lactobacillales_Streptococcaceae_Lactococcus	740	989	811	709	642	718	724	1027	749	627	734	485	670	935	902	774	658	659	820	1051	1279	1626	2449	846	1177	956	1230	1670	1323	505	734	1035	1043	1264	2354	1028	565	497	588	288	404	478	498	994	733	815	334	412	482
Bacteria_Firmicutes_Bacilli_Lactobacillales_Streptococcaceae_Lactovum	107	143	130	157	165	0	89	132	96	148	96	0	73	105	109	162	184	0	26	0	0	0	0	22	18	0	16	0	0	22	15	0	0	0	0	27	14	20	11	26	29	16	23	13	29	55	17	21	22
Bacteria_Firmicutes_Bacilli_Lactobacillales_Streptococcaceae_Pilibacter	0	0	0	0	63	1463	0	0	0	0	452	425	0	0	0	0	208	1373	0	0	27	28	17	0	0	0	0	18	18	0	22	0	33	20	45	0	0	0	0	0	0	0	0	0	0	0	0	0	0
Bacteria_Firmicutes_Bacilli_Lactobacillales_Streptococcaceae_Streptococcus	16105	19058	16560	17295	12398	8243	16164	15097	13856	14843	10901	9403	15295	16670	14980	72247	13353	7860	16251	17896	23279	15948	23240	10194	16212	13503	13965	13414	14504	8603	15286	13034	16283	13168	16083	15878	426572	807599	595507	386930	403522	432776	430636	364506	363727	293501	600318	654546	409780
Bacteria_Firmicutes_Bacilli_Lactobacillales_Vagococcaceae_Vagococcus	358	1050	79	122	0	0	638	1678	451	32	0	0	441	1367	91	56	24	0	41	47	39	45	268	384	48	50	35	49	146	495	59	37	68	35	727	1660	27	46	16	12	0	0	0	0	0	0	43	23	20
Bacteria_Firmicutes_Bacilli_Mycoplasmatales_Mycoplasmataceae_Candidatus Bacilloplasma	76	74	43	24	0	50	64	52	17	34	39	20	75	228	49	31	21	129	47	84	39	38	0	0	61	36	0	17	0	0	140	74	23	31	0	23	15	27	32	17	16	0	15	22	13	0	26	23	18
Bacteria_Firmicutes_Bacilli_Mycoplasmatales_Mycoplasmataceae_Candidatus Lumbricincola	20	18	24	33	0	0	26	33	26	0	0	16	24	24	0	53	0	0	27	33	15	0	28	46	31	23	0	66	28	66	60	26	0	0	21	84	23	28	30	15	27	47	52	51	51	69	21	50	11
Bacteria_Firmicutes_Bacilli_Mycoplasmatales_Mycoplasmataceae_Mycoplasma	3433	4062	2611	2650	1649	1089	3340	3040	2535	2093	1443	1094	3121	3457	2416	9709	1887	1085	2538	2961	3098	2608	2674	1662	4106	2726	2495	2401	2574	1531	3054	2212	1863	1812	2235	1671	244880	326115	261055	198796	216830	232002	239343	177740	167977	119679	228400	251726	199171
Bacteria_Firmicutes_Bacilli_Mycoplasmatales_Mycoplasmataceae_Ureaplasma	401	575	670	771	512	333	505	561	548	570	342	284	509	548	500	3968	866	264	292	347	514	341	335	243	384	201	297	280	393	174	382	217	304	350	356	176	27424	46750	41805	25595	29901	32763	27651	21254	18704	16819	24829	40220	27181
Bacteria_Firmicutes_Bacilli_Mycoplasmatales_Mycoplasmataceae_uncultured	630	674	455	474	139	206	2012	548	436	345	328	75	560	672	388	341	117	708	222	194	115	101	145	126	3809	735	172	125	101	61	273	145	52	59	72	24	2056	1280	1113	697	1284	1510	2138	783	509	507	1292	1480	802
Bacteria_Firmicutes_Bacilli_Paenibacillales_Paenibacillaceae_Ammoniibacillus	0	0	0	0	0	0	0	0	0	0	0	0	0	0	0	0	0	0	0	0	32	44	24	0	0	0	25	46	26	0	0	0	28	25	52	0	0	0	0	0	0	0	0	0	0	0	0	0	0
Bacteria_Firmicutes_Bacilli_Paenibacillales_Paenibacillaceae_Ammoniphilus	23	48	35	28	21	0	38	34	39	21	23	25	35	21	39	34	19	0	63	22	54	49	0	0	86	59	60	30	63	0	42	37	47	46	0	0	288	1350	1591	818	1050	936	584	244	374	322	639	1213	1068
Bacteria_Firmicutes_Bacilli_Paenibacillales_Paenibacillaceae_Cohnella	417	166	199	219	426	825	156	287	163	73	795	1022	323	417	286	216	417	487	169	431	952	1300	1642	575	261	439	681	1164	1150	592	178	432	992	876	1538	1257	81	204	686	495	1056	1028	858	700	857	756	108	310	745
Bacteria_Firmicutes_Bacilli_Paenibacillales_Paenibacillaceae_Oxalophagus	837	513	72	88	0	0	607	457	136	64	0	0	744	412	157	58	0	0	0	0	0	0	0	0	0	0	0	0	0	0	0	0	0	0	0	0	0	0	0	0	0	0	0	0	0	0	0	0	0
Bacteria_Firmicutes_Bacilli_Paenibacillales_Paenibacillaceae_Paenibacillus	5686	5256	5034	3916	4414	4998	4224	5323	3840	3175	3880	5524	5168	4708	4792	3954	4282	4134	4360	5139	13237	17268	15073	6557	6129	6923	7348	13927	11415	4014	4175	8712	11230	11704	13177	12975	1783	3139	3024	2197	3316	3824	3817	3337	3791	3435	1973	3435	2222
Bacteria_Firmicutes_Bacilli_Paenibacillales_Paenibacillaceae_Saccharibacillus	0	0	0	0	0	0	0	0	0	0	25	0	0	0	0	0	0	0	35	0	0	0	44	0	57	21	24	0	18	0	123	0	0	0	37	0	73	311	468	343	499	574	512	24	0	23	158	547	325
Bacteria_Firmicutes_Bacilli_Paenibacillales_Paenibacillaceae_Thermobacillus	231	218	180	125	96	80	165	158	90	102	48	69	254	169	142	127	86	42	62	75	323	394	227	66	99	124	107	253	169	38	65	187	241	250	218	218	0	16	26	57	37	22	23	16	33	24	14	21	17
Bacteria_Firmicutes_Bacilli_Paenibacillales_Paenibacillaceae_Xylanibacillus	85	63	0	0	0	0	66	36	0	0	0	0	75	29	0	0	0	0	0	0	0	0	0	0	0	0	0	0	0	0	0	0	0	0	0	0	0	0	0	0	0	0	0	0	0	0	0	0	0
Bacteria_Firmicutes_Bacilli_Paenibacillales_Paenibacillaceae_uncultured	61	77	53	49	54	41	93	46	52	39	46	29	87	61	72	35	55	32	28	27	61	128	863	261	33	43	37	68	449	129	0	35	62	69	1450	569	0	12	12	0	27	14	12	16	12	17	0	17	0
Bacteria_Firmicutes_Bacilli_Staphylococcales_Gemellaceae_Gemella	195	485	288	317	357	299	283	338	495	238	367	361	191	407	293	436	319	274	485	370	299	364	466	336	359	368	256	293	301	252	315	262	301	379	357	457	215	255	244	179	273	240	186	160	161	185	196	204	213
Bacteria_Firmicutes_Bacilli_Staphylococcales_Staphylococcaceae_Aliicoccus	0	27	0	0	0	0	20	19	0	0	0	0	0	31	19	0	0	0	0	0	0	0	30	0	0	0	0	0	0	0	0	0	0	0	19	0	0	0	0	0	0	0	0	0	0	0	0	0	0
Bacteria_Firmicutes_Bacilli_Staphylococcales_Staphylococcaceae_Auricoccus-Abyssicoccus	0	0	0	0	0	0	0	0	0	0	0	0	0	0	0	0	0	0	0	0	0	0	0	0	0	0	0	0	0	0	0	0	30	0	0	0	0	0	0	12	0	0	13	0	0	0	0	0	0
Bacteria_Firmicutes_Bacilli_Staphylococcales_Staphylococcaceae_Jeotgalicoccus	241	533	247	271	260	171	471	710	208	213	179	97	266	351	217	227	229	140	178	369	794	657	215	200	231	339	462	495	205	137	135	229	412	758	300	52	157	172	184	113	96	121	94	105	83	41	141	159	144
Bacteria_Firmicutes_Bacilli_Staphylococcales_Staphylococcaceae_Macrococcus	0	0	0	0	0	0	0	0	0	0	0	0	0	0	0	0	0	0	0	0	0	44	0	0	0	0	0	0	52	0	0	0	0	0	50	54	0	0	16	0	0	0	0	0	0	0	0	14	0
Bacteria_Firmicutes_Bacilli_Staphylococcales_Staphylococcaceae_Nosocomiicoccus	242	287	299	247	578	493	209	269	342	325	439	262	189	184	319	446	310	310	72	111	196	235	105	62	103	129	153	259	185	41	49	86	226	232	61	26	47	87	309	115	92	85	45	62	71	59	52	116	294
Bacteria_Firmicutes_Bacilli_Staphylococcales_Staphylococcaceae_Salinicoccus	53	77	62	101	56	107	55	68	63	79	49	284	75	72	85	118	54	77	46	65	66	78	115	44	53	61	64	72	65	0	63	44	77	87	82	0	73	191	203	92	135	193	191	136	117	126	101	156	143
Bacteria_Firmicutes_Bacilli_Staphylococcales_Staphylococcaceae_Staphylococcus	18251	22230	15327	17232	16424	14885	16823	17672	16615	15598	17535	16923	15386	19945	15988	22826	14635	13959	19117	21124	19387	18886	26651	15817	19277	19423	13825	16898	18384	13244	15504	14008	20880	16918	22282	21214	47640	63754	58473	57994	48747	54268	51639	51837	49636	42724	36909	54402	49559
Bacteria_Firmicutes_Bacilli_Thermicanales_Thermicanaceae_Hydrogenibacillus	44	32	25	35	0	0	26	28	28	0	28	0	32	37	25	0	0	0	36	19	16	16	0	0	27	0	0	0	0	29	37	0	0	23	0	0	57	22	11	10	0	11	0	11	13	0	27	11	0
Bacteria_Firmicutes_Bacilli_Thermicanales_Thermicanaceae_Thermicanus	33	48	81	95	553	511	40	58	92	169	556	458	31	80	105	119	473	585	132	246	290	337	246	280	160	154	372	347	274	133	224	132	347	484	247	254	41	120	137	47	51	50	61	34	45	17	51	68	75
Bacteria_Firmicutes_Bacilli_Thermoactinomycetales_Thermoactinomycetaceae_Baia	0	15	0	0	0	0	0	0	0	0	16	17	0	0	0	0	0	0	0	0	17	41	109	37	17	18	21	39	46	21	0	20	17	84	93	88	17	21	20	0	0	0	0	0	0	0	0	18	0
Bacteria_Firmicutes_Bacilli_Thermoactinomycetales_Thermoactinomycetaceae_Geothermomicrobium	88	99	105	111	96	71	89	102	122	79	69	59	76	92	78	80	81	67	70	104	86	70	48	48	88	77	83	69	68	37	53	69	88	71	83	31	0	0	0	0	0	0	0	0	0	0	0	0	0
Bacteria_Firmicutes_Bacilli_Thermoactinomycetales_Thermoactinomycetaceae_Hazenella	0	0	0	0	0	0	0	20	15	0	0	0	0	0	0	0	0	0	0	0	0	0	0	0	0	0	0	0	0	0	0	0	0	0	0	0	0	0	11	0	0	0	0	0	0	0	0	0	0
Bacteria_Firmicutes_Bacilli_Thermoactinomycetales_Thermoactinomycetaceae_Kroppenstedtia	0	0	0	0	0	0	0	0	0	0	0	0	0	0	0	0	0	0	0	0	36	54	32	0	0	0	0	49	29	0	0	0	30	68	0	0	0	0	0	0	0	0	0	0	0	0	0	0	0
Bacteria_Firmicutes_Bacilli_Thermoactinomycetales_Thermoactinomycetaceae_Laceyella	47	102	33	83	138	29	59	81	62	72	88	49	26	110	38	30	160	28	0	44	70	57	41	50	33	59	71	69	46	33	0	25	57	60	67	58	0	27	23	0	0	0	14	0	0	21	0	21	13
Bacteria_Firmicutes_Bacilli_Thermoactinomycetales_Thermoactinomycetaceae_Lihuaxuella	0	0	0	0	0	0	0	0	0	0	0	52	0	0	0	0	0	0	0	0	39	50	264	99	0	0	0	35	148	36	0	0	0	0	183	351	0	0	0	0	0	0	0	0	0	0	0	0	0
Bacteria_Firmicutes_Bacilli_Thermoactinomycetales_Thermoactinomycetaceae_Marininema	0	0	0	0	0	0	0	0	0	0	0	0	0	0	0	0	0	0	0	0	0	0	0	0	0	0	0	0	0	0	0	0	0	0	0	38	0	0	0	0	0	0	0	0	0	0	0	0	0
Bacteria_Firmicutes_Bacilli_Thermoactinomycetales_Thermoactinomycetaceae_Mechercharimyces	0	21	22	19	19	0	0	22	23	28	0	0	0	22	0	25	23	0	18	0	0	0	0	0	21	0	0	0	0	0	0	0	0	0	0	0	0	0	0	0	0	0	0	25	21	0	0	0	0
Bacteria_Firmicutes_Bacilli_Thermoactinomycetales_Thermoactinomycetaceae_Melghirimyces	58	188	165	165	642	1129	106	141	190	329	892	1777	46	118	140	145	456	1067	31	88	810	1565	2553	3720	31	72	710	869	1646	2789	38	26	906	2047	2777	2034	0	39	17	0	96	58	94	57	141	348	0	16	0
Bacteria_Firmicutes_Bacilli_Thermoactinomycetales_Thermoactinomycetaceae_Novibacillus	0	0	15	0	0	0	0	0	0	0	0	27	0	0	0	0	0	0	0	0	37	41	30	0	0	19	15	27	31	0	0	32	36	40	29	38	0	10	15	11	0	0	0	0	0	0	0	0	0
Bacteria_Firmicutes_Bacilli_Thermoactinomycetales_Thermoactinomycetaceae_Pasteuria	524	762	309	295	213	194	424	622	351	222	181	167	460	657	313	302	218	100	709	736	775	1074	747	198	975	741	632	852	562	106	1006	913	768	532	715	184	332	266	148	100	130	197	159	299	142	104	204	207	143
Bacteria_Firmicutes_Bacilli_Thermoactinomycetales_Thermoactinomycetaceae_Planifilum	53	28	24	24	25	31	37	26	22	57	51	41	33	27	21	23	16	23	19	27	87	95	75	52	33	46	65	76	56	28	22	66	57	81	74	93	0	11	0	0	15	13	0	0	20	25	0	21	13
Bacteria_Firmicutes_Bacilli_Thermoactinomycetales_Thermoactinomycetaceae_Risungbinella	146	261	367	421	404	536	241	261	340	480	227	449	129	316	387	438	246	347	73	237	1265	1188	143	41	52	302	1192	1416	265	69	47	200	1466	1752	87	31	0	24	62	41	90	110	131	76	47	85	0	14	37
Bacteria_Firmicutes_Bacilli_Thermoactinomycetales_Thermoactinomycetaceae_Seinonella	0	0	0	0	0	0	0	0	0	0	0	0	0	0	0	0	0	0	0	0	0	0	0	0	0	0	0	0	33	0	44	0	0	16	0	0	0	45	67	40	45	21	22	0	0	0	11	46	30
Bacteria_Firmicutes_Bacilli_Thermoactinomycetales_Thermoactinomycetaceae_Shimazuella	295	187	40	38	28	28	194	120	41	40	20	26	267	151	59	43	38	18	29	23	94	100	137	39	58	68	65	80	67	23	26	44	83	53	102	94	32	55	75	89	58	75	42	56	52	66	42	44	66
Bacteria_Firmicutes_Bacilli_Thermoactinomycetales_Thermoactinomycetaceae_Thermoactinomyces	39	63	63	60	59	65	46	53	38	39	62	76	43	64	53	52	60	36	61	84	324	199	92	62	57	145	116	216	108	65	81	141	168	158	103	109	16	13	18	16	14	14	23	11	19	23	17	25	11
Bacteria_Firmicutes_Bacilli_Thermoactinomycetales_Thermoactinomycetaceae_Thermoflavimicrobium	109	135	184	201	186	253	95	144	165	167	129	354	132	112	201	197	145	170	208	287	1075	1551	3556	1218	273	549	695	1318	2437	614	182	572	804	958	3016	2825	27	173	28	16	24	33	32	35	44	36	66	56	21
Bacteria_Firmicutes_Bacilli_Thermoactinomycetales_Thermoactinomycetaceae_uncultured	430	443	152	165	162	127	482	488	202	133	141	122	353	354	254	137	182	129	63	108	246	392	307	167	101	92	147	235	175	169	62	60	328	392	337	175	156	697	842	576	1123	925	1027	627	798	1579	352	564	584
Bacteria_Firmicutes_Clostridia_Caldicoprobacterales_Caldicoprobacteraceae_Caldicoprobacter	855	845	728	870	1114	937	715	668	812	686	1184	687	577	694	738	870	1087	1199	567	800	888	1239	853	491	722	646	856	941	872	632	611	626	1230	1155	684	807	582	1727	1561	529	623	527	471	297	470	546	917	1182	900
Bacteria_Firmicutes_Clostridia_Caldicoprobacterales_Gracilibacteraceae_Gracilibacter	178	135	58	49	90	118	101	89	72	56	114	86	124	107	68	91	130	88	49	133	226	281	241	211	46	74	126	266	153	108	0	77	189	195	141	121	0	0	0	0	0	0	0	0	0	0	0	0	0
Bacteria_Firmicutes_Clostridia_Caldicoprobacterales_Gracilibacteraceae_Lutispora	643	1010	1548	1997	2900	2506	558	973	1696	2006	2630	2153	470	848	1481	1643	3637	2481	621	1302	1139	1032	558	202	822	1013	627	1031	532	149	460	879	932	610	386	448	0	0	0	0	0	0	0	0	0	0	0	0	0
Bacteria_Firmicutes_Clostridia_Caldicoprobacterales_Gracilibacteraceae_uncultured	98	125	130	293	245	98	104	118	195	264	281	232	83	146	172	355	197	153	1441	341	285	227	217	227	465	207	288	162	219	217	4011	355	253	168	162	171	0	0	0	0	0	0	0	0	0	0	0	0	0
Bacteria_Firmicutes_Clostridia_Christensenellales_Christensenellaceae_Catabacter	0	0	0	0	0	0	0	0	0	0	0	0	0	0	0	0	0	0	0	0	0	0	0	0	0	0	0	0	0	0	0	0	0	0	0	0	0	0	0	0	0	0	0	0	0	0	0	0	0
Bacteria_Firmicutes_Clostridia_Christensenellales_Christensenellaceae_Christensenella	0	49	0	0	0	0	0	0	0	0	0	0	47	63	0	0	0	0	0	0	0	0	0	0	0	0	0	0	0	73	0	0	0	0	0	95	34	0	0	0	0	0	0	0	0	0	0	0	0
Bacteria_Firmicutes_Clostridia_Christensenellales_Christensenellaceae_Christensenellaceae R-7 group	5357	7036	4278	5657	6157	4306	5351	6058	6688	6412	5586	4883	4824	6528	4652	5151	6706	4531	3563	5065	6630	6822	11469	6335	4418	4508	6352	6406	6764	5700	3719	3463	7334	7092	9315	7368	4936	8957	7741	6171	4742	4805	5574	6655	4968	2907	5818	7993	5858
Bacteria_Firmicutes_Clostridia_Christensenellales_Christensenellaceae_uncultured	805	902	754	1195	2011	1350	761	891	981	2314	1935	787	772	880	963	856	2653	783	2192	1629	1598	1749	1699	759	1803	1506	1316	1196	1443	567	1734	954	1172	1633	938	732	2060	2438	2977	2990	2419	1872	2346	2803	2221	1377	1954	2254	2500
Bacteria_Firmicutes_Clostridia_Clostridiales_Caloramatoraceae_Caloramator	480	643	536	691	808	760	511	640	608	650	779	619	374	565	603	566	722	672	469	983	698	791	1411	904	628	644	699	657	671	895	339	549	1019	894	1453	782	214	384	316	170	191	221	166	269	268	177	241	345	227
Bacteria_Firmicutes_Clostridia_Clostridiales_Caloramatoraceae_Clostridium	32	116	0	29	0	0	75	76	33	0	0	0	41	103	45	22	0	0	21	0	0	39	0	0	25	0	0	0	0	0	0	16	18	0	0	0	0	0	16	24	38	64	94	85	134	44	0	18	16
Bacteria_Firmicutes_Clostridia_Clostridiales_Caloramatoraceae_Fervidicella	0	0	0	0	0	0	0	0	0	0	0	0	0	19	0	0	0	0	217	218	306	331	841	195	226	260	369	338	243	90	267	186	226	310	565	401	0	0	0	0	0	0	0	0	0	0	0	0	0
Bacteria_Firmicutes_Clostridia_Clostridiales_Caloramatoraceae_Fonticella	456	409	292	270	429	324	345	403	226	233	311	387	432	340	279	232	279	259	225	283	982	1388	1422	496	362	435	531	1128	1013	207	221	549	880	928	1041	1104	215	239	253	122	178	223	219	311	305	143	172	219	183
Bacteria_Firmicutes_Clostridia_Clostridiales_Caloramatoraceae_Thermobrachium	150	254	243	295	242	205	151	181	249	290	225	136	124	234	227	284	226	171	96	111	146	156	143	107	94	89	110	128	126	132	0	55	125	173	151	91	33	61	59	26	41	26	23	26	37	41	44	54	39
Bacteria_Firmicutes_Clostridia_Clostridiales_Caloramatoraceae_uncultured	71	83	48	83	64	78	76	106	78	61	52	45	51	117	73	70	57	50	166	218	552	565	228	128	191	296	645	775	242	87	112	126	256	549	184	94	33	96	149	223	199	165	251	442	501	168	55	132	157
Bacteria_Firmicutes_Clostridia_Clostridiales_Clostridiaceae_Anaerobacter	0	0	0	0	0	0	0	0	0	0	0	0	0	0	0	0	0	0	0	24	27	74	117	75	0	0	25	56	88	46	0	0	40	57	70	111	0	0	15	0	12	23	27	0	0	18	0	17	0
Bacteria_Firmicutes_Clostridia_Clostridiales_Clostridiaceae_Candidatus Arthromitus	96	68	40	27	52	49	65	68	37	25	33	38	116	59	50	74	75	36	174	108	174	160	144	73	202	97	123	159	114	44	327	135	140	238	184	107	168	219	184	127	167	191	179	76	120	72	151	157	122
Bacteria_Firmicutes_Clostridia_Clostridiales_Clostridiaceae_Clostridium sensu stricto 1	10727	10430	11349	9141	15820	16807	7652	10756	8579	7977	12063	17513	10056	8705	10628	9866	15235	13522	10359	11064	27124	33245	52881	23602	11551	12787	16779	27375	33043	14377	11046	14161	29708	27522	35987	43733	12589	22557	25296	19698	20800	24188	33959	22004	31731	24470	13376	34472	14502
Bacteria_Firmicutes_Clostridia_Clostridiales_Clostridiaceae_Clostridium sensu stricto 10	152	114	100	107	121	195	61	91	59	64	71	185	102	64	129	79	85	113	81	87	420	748	1042	528	121	163	253	645	815	240	66	135	333	457	797	1135	45	64	93	72	140	202	291	116	187	138	67	120	53
Bacteria_Firmicutes_Clostridia_Clostridiales_Clostridiaceae_Clostridium sensu stricto 11	258	235	154	164	144	166	163	230	143	98	84	89	179	190	163	117	139	128	500	419	443	467	318	160	519	402	326	374	363	85	379	318	279	362	279	196	109	202	149	212	308	366	495	253	439	323	102	289	129
Bacteria_Firmicutes_Clostridia_Clostridiales_Clostridiaceae_Clostridium sensu stricto 12	1175	1073	1261	888	1688	2541	940	1194	855	897	3544	2326	1059	922	1318	1114	1961	2243	1262	1448	3968	6388	10729	5141	1913	1764	2514	4727	7243	2499	1436	2120	3607	4147	9110	10577	775	1691	1754	1666	2097	2441	2628	1624	2994	1981	1130	1714	1413
Bacteria_Firmicutes_Clostridia_Clostridiales_Clostridiaceae_Clostridium sensu stricto 13	1546	1209	1989	1130	1868	3884	1172	1539	838	982	1603	5629	1346	1131	1482	1605	1652	1939	1285	2130	9689	18848	15294	5619	1835	3175	5126	14308	9894	1902	1189	3619	8217	13664	13952	12277	1805	6232	7933	18401	10851	12237	19115	12072	18335	9617	2186	11828	4336
Bacteria_Firmicutes_Clostridia_Clostridiales_Clostridiaceae_Clostridium sensu stricto 14	0	27	32	0	64	127	0	27	0	0	93	163	0	0	0	0	63	56	0	38	204	380	529	227	48	58	109	346	341	38	0	52	190	297	549	500	0	39	31	31	48	59	84	0	48	0	18	46	19
Bacteria_Firmicutes_Clostridia_Clostridiales_Clostridiaceae_Clostridium sensu stricto 15	284	244	234	180	301	460	193	224	171	194	284	380	217	182	260	151	382	301	77	97	313	615	465	204	125	128	245	396	755	102	70	134	329	489	317	145	40	46	60	58	78	101	125	101	301	255	20	95	31
Bacteria_Firmicutes_Clostridia_Clostridiales_Clostridiaceae_Clostridium sensu stricto 16	141	50	31	0	38	61	94	68	0	0	0	86	90	38	46	0	0	38	0	40	158	334	459	223	36	56	120	241	297	102	0	84	203	217	304	513	0	20	25	52	51	89	120	135	233	180	14	30	26
Bacteria_Firmicutes_Clostridia_Clostridiales_Clostridiaceae_Clostridium sensu stricto 17	373	313	458	262	549	1142	260	497	197	261	530	1248	373	260	328	305	666	700	41	119	840	1937	3107	1542	112	179	565	1259	3979	602	63	175	739	1375	2408	2887	0	0	0	0	13	19	26	10	26	10	0	16	0
Bacteria_Firmicutes_Clostridia_Clostridiales_Clostridiaceae_Clostridium sensu stricto 18	715	577	829	642	935	1315	571	770	487	599	1083	1450	668	565	733	1251	957	761	427	517	2246	3179	2843	1111	583	594	1320	2563	2215	468	434	793	2411	2832	2387	1866	5138	16573	15386	11779	14149	15906	15475	17181	10717	7946	8051	16631	9390
Bacteria_Firmicutes_Clostridia_Clostridiales_Clostridiaceae_Clostridium sensu stricto 19	17	60	65	116	0	0	25	105	73	98	0	0	0	30	59	83	0	0	429	181	121	116	44	24	300	166	105	86	41	0	391	142	95	52	29	0	836	661	1135	734	204	197	84	61	40	25	724	796	1151
Bacteria_Firmicutes_Clostridia_Clostridiales_Clostridiaceae_Clostridium sensu stricto 2	163	87	70	57	61	98	98	60	49	55	68	51	153	47	67	124	53	69	56	70	137	173	187	115	68	116	81	150	138	32	68	113	134	149	167	127	39	120	86	109	181	309	383	192	259	123	53	166	76
Bacteria_Firmicutes_Clostridia_Clostridiales_Clostridiaceae_Clostridium sensu stricto 3	160	128	160	122	228	191	89	117	111	111	187	347	116	127	138	115	232	223	31	77	286	409	503	188	95	118	132	282	311	119	30	119	298	256	466	522	31	177	137	132	192	298	449	163	187	100	91	307	90
Bacteria_Firmicutes_Clostridia_Clostridiales_Clostridiaceae_Clostridium sensu stricto 4	78	0	0	0	0	0	52	0	0	0	0	0	72	0	0	0	0	0	0	0	0	0	0	0	0	0	0	0	0	0	0	0	0	0	0	0	0	27	0	0	35	45	40	0	0	0	19	19	0
Bacteria_Firmicutes_Clostridia_Clostridiales_Clostridiaceae_Clostridium sensu stricto 5	94	68	91	62	53	69	52	65	0	49	38	86	84	61	62	63	76	34	114	128	255	332	203	91	184	190	143	248	159	27	88	217	231	232	238	253	69	393	269	373	428	737	1080	704	609	242	152	604	232
Bacteria_Firmicutes_Clostridia_Clostridiales_Clostridiaceae_Clostridium sensu stricto 6	57	54	73	34	113	108	28	53	32	38	61	117	37	41	58	41	85	81	47	41	341	301	409	162	34	61	130	260	247	73	0	42	214	162	198	445	32	37	34	38	63	111	158	79	97	44	35	64	35
Bacteria_Firmicutes_Clostridia_Clostridiales_Clostridiaceae_Clostridium sensu stricto 7	468	361	615	302	549	982	259	528	247	255	590	1231	384	320	540	364	747	718	163	206	1206	2064	2495	1163	309	320	678	1466	1794	619	145	336	1043	1432	1911	2143	168	593	700	931	807	1125	1822	4333	3394	1098	342	1246	745
Bacteria_Firmicutes_Clostridia_Clostridiales_Clostridiaceae_Clostridium sensu stricto 8	228	220	174	119	164	239	141	207	101	161	141	282	215	100	235	111	126	174	223	337	699	1166	1342	959	349	414	445	960	1109	444	176	400	759	733	1112	1931	103	386	363	525	453	597	898	665	1091	538	167	488	231
Bacteria_Firmicutes_Clostridia_Clostridiales_Clostridiaceae_Clostridium sensu stricto 9	527	433	660	387	515	563	352	590	258	203	298	732	548	312	507	215	304	274	966	774	2277	3198	2919	828	1592	1169	1082	2477	1894	407	762	1490	1930	2139	2200	2829	154	362	675	904	1330	1460	1935	1331	2463	2194	198	695	624
Bacteria_Firmicutes_Clostridia_Clostridiales_Clostridiaceae_Haloimpatiens	115	74	89	40	71	81	74	81	29	37	61	60	39	65	57	75	86	44	45	49	65	103	75	29	42	48	49	71	73	0	82	62	93	66	38	56	24	29	39	70	69	88	164	119	302	254	27	49	38
Bacteria_Firmicutes_Clostridia_Clostridiales_Clostridiaceae_Hathewaya	144	98	133	77	172	440	74	141	61	78	201	424	103	80	159	117	240	261	76	81	391	305	204	74	70	64	157	306	116	0	54	109	580	307	210	106	441	397	124	69	49	66	135	66	129	93	574	224	85
Bacteria_Firmicutes_Clostridia_Clostridiales_Clostridiaceae_Oceanirhabdus	868	838	1222	526	1259	2131	523	902	414	485	1139	2526	966	598	1017	602	1229	1658	645	384	2111	3944	4712	2093	548	603	1245	3002	5703	735	242	710	1452	2704	2949	2846	0	0	0	0	15	13	0	15	21	20	0	0	0
Bacteria_Firmicutes_Clostridia_Clostridiales_Clostridiaceae_Proteiniclasticum	281	272	313	409	227	206	205	234	300	309	163	217	240	219	334	443	219	139	138	195	243	437	558	302	223	149	219	387	496	177	250	177	367	379	346	364	113	185	264	234	301	394	597	361	485	285	162	319	175
Bacteria_Firmicutes_Clostridia_Clostridiales_Clostridiaceae_Sarcina	391	269	303	217	192	121	209	219	181	174	120	205	328	207	246	264	182	107	327	333	485	613	424	182	299	275	228	409	239	259	230	364	569	411	521	326	211	314	300	277	279	334	387	247	301	215	208	262	269
Bacteria_Firmicutes_Clostridia_Clostridiales_Clostridiaceae_Youngiibacter	0	0	0	0	0	0	0	0	0	0	0	0	0	0	0	0	0	0	0	0	0	0	0	0	0	0	0	0	0	0	0	0	0	0	0	40	0	0	0	0	0	0	0	0	0	0	0	0	0
Bacteria_Firmicutes_Clostridia_Clostridiales_Clostridiaceae_uncultured	3287	2768	4100	2237	4436	6969	1912	3515	1732	2055	5900	7799	2998	3026	3409	2163	4214	5909	2938	1564	4831	10250	10978	3494	1502	1745	3066	6412	13580	3236	953	2229	4241	5588	6005	6180	185	1125	1414	1095	880	802	654	397	362	183	432	972	951
Bacteria_Firmicutes_Clostridia_Clostridiales_Oxobacteraceae_Oxobacter	109	134	96	119	122	675	103	93	124	287	175	670	100	105	113	137	97	562	514	628	603	619	535	281	513	405	438	541	362	180	432	397	432	458	715	249	480	423	378	128	189	166	141	165	170	117	312	302	175
Bacteria_Firmicutes_Clostridia_Eubacteriales_Alkalibacteraceae_Alkalibacter	53	93	34	38	28	29	59	65	50	27	47	22	34	67	52	32	32	19	167	165	94	76	182	72	134	137	87	83	156	264	108	111	62	46	145	46	15	16	22	13	0	21	18	11	14	0	16	31	0
Bacteria_Firmicutes_Clostridia_Eubacteriales_Anaerofustaceae_Anaerofustis	472	534	165	215	280	172	307	394	243	243	225	182	502	341	214	235	588	177	379	431	272	326	468	1349	367	310	436	491	369	1142	387	208	428	1329	585	580	721	1167	624	300	288	307	288	220	182	122	1033	707	417
Bacteria_Firmicutes_Clostridia_Eubacteriales_Eubacteriaceae_Acetobacterium	630	648	377	366	546	885	601	648	350	333	522	904	475	534	402	597	452	857	274	371	603	499	687	562	369	355	534	612	403	436	266	215	556	535	655	1186	130	317	268	2442	313	250	257	2167	350	164	176	303	263
Bacteria_Firmicutes_Clostridia_Eubacteriales_Eubacteriaceae_Eubacterium	409	517	524	597	618	1299	436	643	495	403	533	728	319	580	614	482	512	474	296	288	418	419	191	214	325	313	381	392	257	146	224	311	461	396	261	86	98	263	261	193	193	210	139	99	67	64	144	256	229
Bacteria_Firmicutes_Clostridia_Eubacteriales_Eubacteriaceae_Pseudoramibacter	17	21	0	0	0	138	0	0	0	0	71	202	19	0	0	16	0	77	26	0	47	48	35	17	24	0	23	35	0	19	37	18	18	30	34	0	26	12	15	0	15	45	19	29	10	0	12	13	0
Bacteria_Firmicutes_Clostridia_Eubacteriales_Eubacteriaceae_uncultured	116	118	33	34	55	45	88	74	55	51	42	147	116	79	34	55	86	94	61	46	47	42	47	52	75	43	73	77	60	74	111	33	49	41	43	32	59	31	21	11	18	25	20	35	39	23	34	29	17
Bacteria_Firmicutes_Clostridia_Eubacteriales_Garciellaceae_Alkalibaculum	286	1391	85	191	0	0	662	1500	486	44	0	21	358	1171	66	26	34	0	197	54	102	120	102	160	456	148	123	69	76	63	393	39	25	27	127	58	0	0	0	0	0	0	0	0	0	0	0	0	0
Bacteria_Firmicutes_Clostridia_Eubacteriales_Garciellaceae_Garciella	0	45	17	49	30	42	16	25	58	44	36	64	0	23	39	34	132	60	108	53	74	98	112	17	147	75	220	242	92	80	209	99	77	104	88	0	76	39	10	0	19	11	0	0	0	0	46	24	21
Bacteria_Firmicutes_Clostridia_Eubacteriales_Garciellaceae_Irregularibacter	52	86	72	77	62	69	56	59	96	86	59	222	49	57	79	195	86	86	48	64	86	160	146	68	73	71	57	84	79	46	76	95	95	92	150	111	161	181	53	32	36	51	24	28	30	12	128	95	32
Bacteria_Firmicutes_Clostridia_Eubacteriales_Garciellaceae_Rhabdanaerobium	0	0	0	0	0	0	0	0	0	0	0	0	0	0	0	0	0	0	0	0	0	0	0	0	0	0	0	0	0	0	0	0	0	0	0	0	24	35	0	0	0	0	0	0	0	0	100	12	0
Bacteria_Firmicutes_Clostridia_Lachnospirales_Defluviitaleaceae_Defluviitalea	99	86	87	56	78	74	77	90	76	50	58	64	65	48	68	89	35	54	59	43	173	197	174	78	87	77	81	158	163	80	50	54	104	121	151	61	166	31	23	14	19	33	32	19	20	0	55	35	19
Bacteria_Firmicutes_Clostridia_Lachnospirales_Defluviitaleaceae_Defluviitaleaceae UCG-011	1128	779	589	376	376	375	754	702	349	282	320	447	965	3243	437	370	388	268	969	899	1318	2086	813	320	1125	902	869	1327	1144	330	1673	954	1225	899	636	390	4952	4373	3971	12110	1694	1041	1468	4118	2784	1552	2838	1810	2331
Bacteria_Firmicutes_Clostridia_Lachnospirales_Lachnospiraceae_A2	255	251	168	251	169	116	219	238	254	250	154	102	170	209	174	205	198	167	121	147	155	129	94	89	249	129	142	125	126	146	233	107	136	162	78	142	153	157	122	115	142	152	156	114	89	74	92	149	127
Bacteria_Firmicutes_Clostridia_Lachnospirales_Lachnospiraceae_ASF356	60	22	0	24	0	0	30	0	0	28	0	0	30	42	0	0	0	0	0	0	0	0	0	0	24	0	0	0	0	0	0	0	0	0	0	0	0	13	0	0	11	0	0	12	0	0	14	11	0
[truncated: 1,864 more rows]
[truncated: 49 more columns]

## Sheet: Cable_bacteria_seqs
Thirteen 16S rRNA gene sequences selected on the basis of e-value < 1x10e-10, percent identity (>90%), and query cover (> 95%) by BLASTN alignment of query sequences to the SILVA_138.1_SSURef_NR99 database and augmented with 44 Ca. Electrotrix.
[truncated: 46 more rows]

[truncated: 4 more sheets: cable_bacteria_abundance, Pearson_corr_Koljö, Pearson_corr_Offshore, sulfammox]
