# Supplementary material for: Evidence for cable bacteria inhabiting deep in anoxic sediment reveals a novel ecological niche
Source: Research Square preprint supplement (doi:10.21203/rs.3.rs-6914568/v1), 2025-07-02
Supplement: Supplementary file 6 [file eb08023a90433d76dc9a32c7.xlsx]

## Sheet: stats_libraries
Raw Sequenced libraries
Place	Depth samples	Core	NGI ID	Mreads	>=Q30(%)
Kristineberg Bay	Kristineberg_0–1	1	P30612_101	122.99	93.31
Kristineberg Bay	Kristineberg_1–3	1	P30612_102	129.92	93.71
Kristineberg Bay	Kristineberg_7–9	1	P30612_103	107.15	93.4
Kristineberg Bay	Kristineberg_9–11	1	P30612_104	111.45	93.85
Kristineberg Bay	Kristineberg_20–22	1	P30612_105	116.89	93.48
Kristineberg Bay	Kristineberg_30–32	1	P30612_106	100.22	93.6
Kristineberg Bay	Kristineberg_0–2	2	P30612_107	105.55	93.9
Kristineberg Bay	Kristineberg_2–3	2	P30612_108	110.2	93.86
Kristineberg Bay	Kristineberg_7–9	2	P30612_109	105.5	93.32
Kristineberg Bay	Kristineberg_9–11	2	P30612_110	96.81	93.42
Kristineberg Bay	Kristineberg_20–22	2	P30612_111	104.94	93.51
Kristineberg Bay	Kristineberg_30–32	2	P30612_112	90.57	93.48
Kristineberg Bay	Kristineberg_0–2	3	P30612_113	101.34	93.4
Kristineberg Bay	Kristineberg_2–3	3	P30612_114	117.46	93.79
Kristineberg Bay	Kristineberg_7–9	3	P30612_115	104.83	93.58
Kristineberg Bay	Kristineberg_9–11	3	P30612_116	100.03	92.24
Kristineberg Bay	Kristineberg_20–22	3	P30612_117	113.44	93.57
Kristineberg Bay	Kristineberg_30–32	3	P30612_118	96.16	93.75
Koljö Fjord	Koljö.Fjord_0–1	1	P30612_119	95.85	93.74
Koljö Fjord	Koljö.Fjord_1–3	1	P30612_120	105.06	93.33
Koljö Fjord	Koljö.Fjord_7–9	1	P30612_121	96.83	93.27
Koljö Fjord	Koljö.Fjord_9–11	1	P30612_122	99.22	93.81
Koljö Fjord	Koljö.Fjord_20–22	1	P30612_123	105.73	93.88
Koljö Fjord	Koljö.Fjord_30–32	1	P30612_124	99.1	94.04
Koljö Fjord	Koljö.Fjord_0–1	2	P30612_125	101.71	93.5
Koljö Fjord	Koljö.Fjord_1–3	2	P30612_126	87.58	93.52
Koljö Fjord	Koljö.Fjord_7–9	2	P30612_127	90	93.62
Koljö Fjord	Koljö.Fjord_9–11	2	P30612_128	95.28	93.53
Koljö Fjord	Koljö.Fjord_20-22	2	P30612_129	97.34	93.47
Koljö Fjord	Koljö.Fjord_30-32	2	P30612_130	99.41	93.68
Koljö Fjord	Koljö.Fjord_0–1	3	P30612_131	93.48	94.19
Koljö Fjord	Koljö.Fjord_1–3	3	P30612_132	86.94	93.76
Koljö Fjord	Koljö.Fjord_7–9	3	P30612_133	94.63	93.68
Koljö Fjord	Koljö.Fjord_9–11	3	P30612_134	91.01	93.03
Koljö Fjord	Koljö.Fjord_20-22	3	P30612_135	101.72	93.81
Koljö Fjord	Koljö.Fjord_30-32	3	P30612_136	82.23	93.84

## Sheet: fastQC
Trimmed libraries (single)
FastQC
Place	Depth samples	Core	Sample Name (trimmed)	% Dups	% GC	Million Seqs
Kristineberg Bay	Kristineberg_0–1	1	P30612_101_S332_trimmed_R1.PwU.qtrim	0.773	0.51	119.8
Kristineberg Bay	Kristineberg_0–1	1	P30612_101_S332_trimmed_R2.PwU.qtrim	0.808	0.52	119.8
Kristineberg Bay	Kristineberg_1–3	1	P30612_102_S333_trimmed_R1.PwU.qtrim	0.784	0.52	127.8
Kristineberg Bay	Kristineberg_1–3	1	P30612_102_S333_trimmed_R2.PwU.qtrim	0.825	0.53	127.8
Kristineberg Bay	Kristineberg_7–9	1	P30612_103_S334_trimmed_R1.PwU.qtrim	0.812	0.53	104
Kristineberg Bay	Kristineberg_7–9	1	P30612_103_S334_trimmed_R2.PwU.qtrim	0.849	0.53	104
Kristineberg Bay	Kristineberg_9–11	1	P30612_104_S335_trimmed_R1.PwU.qtrim	0.813	0.53	109.1
Kristineberg Bay	Kristineberg_9–11	1	P30612_104_S335_trimmed_R2.PwU.qtrim	0.857	0.53	109.1
Kristineberg Bay	Kristineberg_20–22	1	P30612_105_S336_trimmed_R1.PwU.qtrim	0.832	0.53	114.5
Kristineberg Bay	Kristineberg_20–22	1	P30612_105_S336_trimmed_R2.PwU.qtrim	0.872	0.53	114.5
Kristineberg Bay	Kristineberg_30–32	1	P30612_106_S337_trimmed_R1.PwU.qtrim	0.832	0.53	98.5
Kristineberg Bay	Kristineberg_30–32	1	P30612_106_S337_trimmed_R2.PwU.qtrim	0.876	0.53	98.5
Kristineberg Bay	Kristineberg_0–2	2	P30612_107_S338_trimmed_R1.PwU.qtrim	0.766	0.52	103.9
Kristineberg Bay	Kristineberg_0–2	2	P30612_107_S338_trimmed_R2.PwU.qtrim	0.811	0.53	103.9
Kristineberg Bay	Kristineberg_2–3	2	P30612_108_S339_trimmed_R1.PwU.qtrim	0.779	0.52	109.3
Kristineberg Bay	Kristineberg_2–3	2	P30612_108_S339_trimmed_R2.PwU.qtrim	0.83	0.53	109.3
Kristineberg Bay	Kristineberg_7–9	2	P30612_109_S340_trimmed_R1.PwU.qtrim	0.794	0.52	103.6
Kristineberg Bay	Kristineberg_7–9	2	P30612_109_S340_trimmed_R2.PwU.qtrim	0.839	0.53	103.6
Kristineberg Bay	Kristineberg_9–11	2	P30612_110_S341_trimmed_R1.PwU.qtrim	0.793	0.53	94.7
Kristineberg Bay	Kristineberg_9–11	2	P30612_110_S341_trimmed_R2.PwU.qtrim	0.843	0.53	94.7
Kristineberg Bay	Kristineberg_20–22	2	P30612_111_S342_trimmed_R1.PwU.qtrim	0.83	0.53	101.7
Kristineberg Bay	Kristineberg_20–22	2	P30612_111_S342_trimmed_R2.PwU.qtrim	0.875	0.53	101.7
Kristineberg Bay	Kristineberg_30–32	2	P30612_112_S343_trimmed_R1.PwU.qtrim	0.836	0.53	87
Kristineberg Bay	Kristineberg_30–32	2	P30612_112_S343_trimmed_R2.PwU.qtrim	0.881	0.53	87
Kristineberg Bay	Kristineberg_0–2	3	P30612_113_S344_trimmed_R1.PwU.qtrim	0.755	0.52	98.1
Kristineberg Bay	Kristineberg_0–2	3	P30612_113_S344_trimmed_R2.PwU.qtrim	0.806	0.52	98.1
Kristineberg Bay	Kristineberg_2–3	3	P30612_114_S345_trimmed_R1.PwU.qtrim	0.787	0.52	115
Kristineberg Bay	Kristineberg_2–3	3	P30612_114_S345_trimmed_R2.PwU.qtrim	0.828	0.53	115
Kristineberg Bay	Kristineberg_7–9	3	P30612_115_S346_trimmed_R1.PwU.qtrim	0.805	0.53	102.4
Kristineberg Bay	Kristineberg_7–9	3	P30612_115_S346_trimmed_R2.PwU.qtrim	0.847	0.53	102.4
Kristineberg Bay	Kristineberg_9–11	3	P30612_116_S347_trimmed_R1.PwU.qtrim	0.856	0.53	97.5
Kristineberg Bay	Kristineberg_9–11	3	P30612_116_S347_trimmed_R2.PwU.qtrim	0.869	0.54	97.5
Kristineberg Bay	Kristineberg_20–22	3	P30612_117_S348_trimmed_R1.PwU.qtrim	0.889	0.53	112.6
Kristineberg Bay	Kristineberg_20–22	3	P30612_117_S348_trimmed_R2.PwU.qtrim	0.92	0.53	112.6
Kristineberg Bay	Kristineberg_30–32	3	P30612_118_S349_trimmed_R1.PwU.qtrim	0.826	0.53	94.7
Kristineberg Bay	Kristineberg_30–32	3	P30612_118_S349_trimmed_R2.PwU.qtrim	0.873	0.53	94.7
Koljö Fjord	Koljö.Fjord_0–1	1	P30612_119_S350_trimmed_R1.PwU.qtrim	0.822	0.51	91.2
Koljö Fjord	Koljö.Fjord_0–1	1	P30612_119_S350_trimmed_R2.PwU.qtrim	0.864	0.51	91.2
Koljö Fjord	Koljö.Fjord_1–3	1	P30612_120_S351_trimmed_R1.PwU.qtrim	0.813	0.52	100.7
Koljö Fjord	Koljö.Fjord_1–3	1	P30612_120_S351_trimmed_R2.PwU.qtrim	0.848	0.52	100.7
Koljö Fjord	Koljö.Fjord_7–9	1	P30612_121_S352_trimmed_R1.PwU.qtrim	0.801	0.52	93.2
Koljö Fjord	Koljö.Fjord_7–9	1	P30612_121_S352_trimmed_R2.PwU.qtrim	0.838	0.53	93.2
Koljö Fjord	Koljö.Fjord_9–11	1	P30612_122_S353_trimmed_R1.PwU.qtrim	0.798	0.52	96.7
Koljö Fjord	Koljö.Fjord_9–11	1	P30612_122_S353_trimmed_R2.PwU.qtrim	0.844	0.53	96.7
Koljö Fjord	Koljö.Fjord_20–22	1	P30612_123_S354_trimmed_R1.PwU.qtrim	0.852	0.53	102.1
Koljö Fjord	Koljö.Fjord_20–22	1	P30612_123_S354_trimmed_R2.PwU.qtrim	0.881	0.53	102.1
Koljö Fjord	Koljö.Fjord_30–32	1	P30612_124_S355_trimmed_R1.PwU.qtrim	0.84	0.53	98
Koljö Fjord	Koljö.Fjord_30–32	1	P30612_124_S355_trimmed_R2.PwU.qtrim	0.878	0.53	98
Koljö Fjord	Koljö.Fjord_0–1	2	P30612_125_S356_trimmed_R1.PwU.qtrim	0.785	0.51	98.2
Koljö Fjord	Koljö.Fjord_0–1	2	P30612_125_S356_trimmed_R2.PwU.qtrim	0.828	0.51	98.2
Koljö Fjord	Koljö.Fjord_1–3	2	P30612_126_S357_trimmed_R1.PwU.qtrim	0.79	0.52	84.4
Koljö Fjord	Koljö.Fjord_1–3	2	P30612_126_S357_trimmed_R2.PwU.qtrim	0.835	0.52	84.4
Koljö Fjord	Koljö.Fjord_7–9	2	P30612_127_S358_trimmed_R1.PwU.qtrim	0.786	0.52	87.9
Koljö Fjord	Koljö.Fjord_7–9	2	P30612_127_S358_trimmed_R2.PwU.qtrim	0.833	0.53	87.9
Koljö Fjord	Koljö.Fjord_9–11	2	P30612_128_S359_trimmed_R1.PwU.qtrim	0.806	0.52	92.5
Koljö Fjord	Koljö.Fjord_9–11	2	P30612_128_S359_trimmed_R2.PwU.qtrim	0.847	0.53	92.5
Koljö Fjord	Koljö.Fjord_20-22	2	P30612_129_S360_trimmed_R1.PwU.qtrim	0.791	0.52	95
Koljö Fjord	Koljö.Fjord_20-22	2	P30612_129_S360_trimmed_R2.PwU.qtrim	0.84	0.52	95
Koljö Fjord	Koljö.Fjord_30-32	2	P30612_130_S361_trimmed_R1.PwU.qtrim	0.854	0.53	98
Koljö Fjord	Koljö.Fjord_30-32	2	P30612_130_S361_trimmed_R2.PwU.qtrim	0.89	0.53	98
Koljö Fjord	Koljö.Fjord_0–1	3	P30612_131_S362_trimmed_R1.PwU.qtrim	0.806	0.5	90.5
Koljö Fjord	Koljö.Fjord_0–1	3	P30612_131_S362_trimmed_R2.PwU.qtrim	0.848	0.51	90.5
Koljö Fjord	Koljö.Fjord_1–3	3	P30612_132_S363_trimmed_R1.PwU.qtrim	0.817	0.51	84.7
Koljö Fjord	Koljö.Fjord_1–3	3	P30612_132_S363_trimmed_R2.PwU.qtrim	0.853	0.52	84.7
Koljö Fjord	Koljö.Fjord_7–9	3	P30612_133_S364_trimmed_R1.PwU.qtrim	0.827	0.52	90.7
Koljö Fjord	Koljö.Fjord_7–9	3	P30612_133_S364_trimmed_R2.PwU.qtrim	0.867	0.53	90.7
Koljö Fjord	Koljö.Fjord_9–11	3	P30612_134_S365_trimmed_R1.PwU.qtrim	0.795	0.52	89.8
Koljö Fjord	Koljö.Fjord_9–11	3	P30612_134_S365_trimmed_R2.PwU.qtrim	0.833	0.53	89.8
Koljö Fjord	Koljö.Fjord_20-22	3	P30612_135_S366_trimmed_R1.PwU.qtrim	0.865	0.52	99.3
Koljö Fjord	Koljö.Fjord_20-22	3	P30612_135_S366_trimmed_R2.PwU.qtrim	0.903	0.53	99.3
Koljö Fjord	Koljö.Fjord_30-32	3	P30612_136_S367_trimmed_R1.PwU.qtrim	0.886	0.53	79.2
Koljö Fjord	Koljö.Fjord_30-32	3	P30612_136_S367_trimmed_R2.PwU.qtrim	0.922	0.53	79.2

## Sheet: flash
Merged libraries with FLASH V 1.2.11
Place	Depth samples	Core	Samples	Length read	Percent combined
Kristineberg Bay	Kristineberg_0–1	1	P30612_101_S332	227.941	0.4492
Kristineberg Bay	Kristineberg_1–3	1	P30612_102_S333	237.056	0.4516
Kristineberg Bay	Kristineberg_7–9	1	P30612_103_S334	225.822	0.488
Kristineberg Bay	Kristineberg_9–11	1	P30612_104_S335	228.671	0.4998
Kristineberg Bay	Kristineberg_20–22	1	P30612_105_S336	225.847	0.463
Kristineberg Bay	Kristineberg_30–32	1	P30612_106_S337	223.95	0.4759
Kristineberg Bay	Kristineberg_0–2	2	P30612_107_S338	239.277	0.5116
Kristineberg Bay	Kristineberg_2–3	2	P30612_108_S339	246.134	0.4728
Kristineberg Bay	Kristineberg_7–9	2	P30612_109_S340	232.434	0.42
Kristineberg Bay	Kristineberg_9–11	2	P30612_110_S341	225.455	0.4953
Kristineberg Bay	Kristineberg_20–22	2	P30612_111_S342	212.742	0.552
Kristineberg Bay	Kristineberg_30–32	2	P30612_112_S343	203.698	0.6308
Kristineberg Bay	Kristineberg_0–2	3	P30612_113_S344	225.617	0.497
Kristineberg Bay	Kristineberg_2–3	3	P30612_114_S345	235.606	0.4984
Kristineberg Bay	Kristineberg_7–9	3	P30612_115_S346	224.67	0.4923
Kristineberg Bay	Kristineberg_9–11	3	P30612_116_S347	212.168	0.5391
Kristineberg Bay	Kristineberg_20–22	3	P30612_117_S348	239.385	0.4271
Kristineberg Bay	Kristineberg_30–32	3	P30612_118_S349	223.708	0.4894
Koljö Fjord	Koljö.Fjord_0–1	1	P30612_119_S350	195.327	0.7126
Koljö Fjord	Koljö.Fjord_1–3	1	P30612_120_S351	207.996	0.5787
Koljö Fjord	Koljö.Fjord_7–9	1	P30612_121_S352	205.409	0.6202
Koljö Fjord	Koljö.Fjord_9–11	1	P30612_122_S353	214.765	0.5383
Koljö Fjord	Koljö.Fjord_20–22	1	P30612_123_S354	199.128	0.6832
Koljö Fjord	Koljö.Fjord_30–32	1	P30612_124_S355	224.666	0.5473
Koljö Fjord	Koljö.Fjord_0–1	2	P30612_125_S356	216.595	0.5157
Koljö Fjord	Koljö.Fjord_1–3	2	P30612_126_S357	211.331	0.5896
Koljö Fjord	Koljö.Fjord_7–9	2	P30612_127_S358	227.302	0.5074
Koljö Fjord	Koljö.Fjord_9–11	2	P30612_128_S359	214.168	0.5448
Koljö Fjord	Koljö.Fjord_20-22	2	P30612_129_S360	219.392	0.5071
Koljö Fjord	Koljö.Fjord_30-32	2	P30612_130_S361	222.822	0.5203
Koljö Fjord	Koljö.Fjord_0–1	3	P30612_131_S362	207.25	0.7062
Koljö Fjord	Koljö.Fjord_1–3	3	P30612_132_S363	211.396	0.5669
Koljö Fjord	Koljö.Fjord_7–9	3	P30612_133_S364	194.337	0.6877
Koljö Fjord	Koljö.Fjord_9–11	3	P30612_134_S365	234.038	0.4219
Koljö Fjord	Koljö.Fjord_20-22	3	P30612_135_S366	211.225	0.5951
Koljö Fjord	Koljö.Fjord_30-32	3	P30612_136_S367	198.794	0.7329
